# Supplementary material for: The Somatic Mutation Landscape of UDP-Glycosyltransferase (UGT) Genes in Human Cancers
Source: MDPI journal article supplement (doi:10.3390/cancers14225708), 2022-11-21
Supplement: s1 [file s1]

Table S6. Mutations at 5' untranslated regions (UTRs) of *UGT* genes in TCGA tumors

| 1A8                  | 1A10                            | 1A9                  | 1A4      | 1A6                                                                                                                                    | 1A3     | 1A1                 | 2A1                                          | 2A3                 | 2B4                                         | 2B7                 | 2B10                            | 2B11               | 2B15               | 2B17    | 2B28    | 3A1                                                                                                                                                                                                      | 3A2                                                                                                     |
|----------------------|---------------------------------|----------------------|----------|----------------------------------------------------------------------------------------------------------------------------------------|---------|---------------------|----------------------------------------------|---------------------|---------------------------------------------|---------------------|---------------------------------|--------------------|--------------------|---------|---------|----------------------------------------------------------------------------------------------------------------------------------------------------------------------------------------------------------|---------------------------------------------------------------------------------------------------------|
| c.-58G>A<br>c.-17C>T | c.-17C>T<br>c.-11G>A<br>c.-1C>T | c.-39T>C<br>c.-32C>T | c.-25T>C | c.-117G>C<br>c.-101C>A<br>c.-96G>A<br>c.89A>G<br>c.-74G>A<br>c.-53G>A<br>c.-38_-37delAA<br>c.-36C>T<br>c.-34C>T<br>c.-25C>T<br>c.-4C>T | c.-3G>A | c.-10C>A<br>c.-3G>A | c.-39G>T<br>c.-25C>A<br>c.-20C>A<br>c.-11C>G | c.-25A>T<br>c.-4C>T | c.-26G>T<br>c.-26G>A<br>c.-18G>T<br>c.-8G>A | c.-27G>A<br>c.-1G>A | c.-26G>A<br>c.-17T>A<br>c.-2G>A | c.-7C>T<br>c.-1G>C | c.-7G>A<br>c.-4C>A | c.-2G>A | c.-1G>A | c.-159>A<br>c.-112C>T<br>c.-90C>A<br>c.-73C>T<br>c.-72G>A<br>c.-70G>A<br>c.-52G>A<br>c.-51G>A<br>c.-49G>A<br>c.-46G>T<br>c.-43C>T<br>c.-37G>A<br>c.-28G>C<br>c.-22C>T<br>c.-22C>A<br>c.-14C>T<br>c.-4G>T | c.-81G>C<br>c.-78C>T<br>c.-76G>C<br>c.-62C>A<br>c.-14C>T<br>c.-13C>T<br>c.-12G>C<br>c.-11T>C<br>c.-2G>A |

Table S6. Mutations at 5' untranslated regions (UTRs) of *UGT* genes in TCGA tumors
