# Supplementary material for: The Somatic Mutation Landscape of UDP-Glycosyltransferase (UGT) Genes in Human Cancers
Source: MDPI journal article supplement (doi:10.3390/cancers14225708), 2022-11-21
Supplement: s1 [file s1]

Table S10. Mutations of *UGT* genes found in both TCGA tumors and CCLE cell lines

| UGT genes | Mutations                         | TCGA tumors                      | CCLE                                                                                           |
|-----------|-----------------------------------|----------------------------------|------------------------------------------------------------------------------------------------|
| 1A1       | c.676G>A (Val226Ile)              | SKCM-Metastatic                  | Colorectal cancer (LS180)                                                                      |
| 1A4       | c.517dupT (Trp173LeufsTer7)       | STAD, UCEC                       | Colorectal cancer (CW2, SW48)                                                                  |
| 1A5       | c.850G>A (Gly284Arg)              | UCEC                             | Endometrial cancer (HEC151)                                                                    |
|           | c.725_726dupAG (Val243ArgfsTer21) | ARC                              | Endometrial cancer (HEC265)                                                                    |
| 1A6       | c.29G>T (Arg10Ile)                | HNSC                             | Colorectal cancer (SNU81)                                                                      |
|           | c.616del (Ser206ProfsTer38)       | STAD                             | Mixed cancer types (RHJT)                                                                      |
|           | c.831C>G (Ile277Met)              | STAD                             | Glioma (LN428)                                                                                 |
| 1A7       | c.8G>A (Arg3His)                  | UCS                              | Colorectal cancer (SNU407)                                                                     |
|           | c.364delT (Ser122GlnfsTer12)      | COAD, STAD                       | Colorectal cancer (KM12); Hodgkin Lymphoma (SUPHD1)                                            |
|           | c.761G>A (Arg254Gln)              | COAD, SKCM primary               | Cancer of unknown primary (HCC2998)                                                            |
|           | c.760C>T (Arg254Ter)              | OV                               | Small cell lung cancer (NCIH446)                                                               |
|           | c.577C>A (Leu193Ile)              | LUAD                             | Renal cell carcinoma (SNU1272); Mature B-cell neoplasms (KMS26); Esophagogastric cancer (SNU1) |
|           | c.719C>T (Thr240Met)              | ESCA, LUSC, PRAD                 | Non-small cell lung cancer (NCIH1355); Cancer of unknown primary (NCIH1688)                    |
| 1A8       | c.200G>A (Gly67Glu)               | SKCM-metastatic                  | Non-small cell lung cancer (NCIH2405)                                                          |
|           | c.308G>A (Arg103Gln)              | HNSC                             | T-Lymphoblastic Leukemia/Lymphoma (RPMI8402)                                                   |
|           | c.391C>T (Arg131Ter)              | LUSC, STAD                       | Endometrial cancer (HEC1A); Cancer of unknown primary (HEC1)                                   |
|           | c.677delA (Asn226MetfsTer3)       | UCEC                             | Endometrial cancer (SNGM)                                                                      |
| 1A9       | c.364delT (Ser122GlnfsTer12)      | UCEC                             | T-Lymphoblastic Leukemia/Lymphoma (MOLT4, JURKAT)                                              |
|           | c.442G>A (Asp148Asn)              | COAD, SKCM-metastatic            | Endometrial cancer (JHUEM1)                                                                    |
|           | c.685G>A (Glu229Lys)              | GBM                              | Melanoma (WM983B)                                                                              |
| 1A10      | c.511G>A (Gly171Arg)              | SKCM-metastatic                  | Melanoma (CHL1)                                                                                |
| 1A E2-5   | c.1566delA (Arg524GluTer22)       | BRCA, COAD, STAD                 | Endometrial cancer (RL952, HEC59); T-Lymphoblastic Leukemia/Lymphoma (MOLT4, MOLT3)            |
|           |                                   |                                  | Colorectal cancer (SNU1040)                                                                    |
| 2A2       | c.362G>A (Gly121Glu)              | LIHC, SKCM (Primary, Metastatic) | Melanoma (CP66MEL)                                                                             |
|           | c.557C>T (Ser186Leu)              | SKCM-metastatic                  | Bladder cancer (5637)                                                                          |
| 2A E2-6   | c.845C>A (Pro282His)              | KIRP                             | Non-small cell lung cancer (HCC827)                                                            |
| 2A3       | c.342delT (Phe114LeufsTer4)       | CESC, COAD, STAD                 | Colorectal cancer (CW2, SNU407); Cancer of unknown primary (DG75)                              |
|           | c.890C>T (Ser297Leu)              | SKCM-metastatic                  | Cancer of unknown primary (TGW)                                                                |
|           | c.1195G>A (Asp399Asn)             | SKCM-metastatic                  | Mature B-cell neoplasms (HUNS1)                                                                |
|           | c.1448G>T (Trp483Leu)             | KIRC                             | Cancer of unknown primary (LAN6)                                                               |
|           | c.1532dupT (Leu511PhefsTer8)      | THYM                             | Endometrial cancer (EN)                                                                        |
| 2B4       | c.133G>A (Glu45Lys)               | LUAD, SKCM (Primary, Metastatic) | Melanoma (IPC298)                                                                              |
|           | c.340G>T (Glu114Ter)              | UCEC                             | Endometrial cancer (JHUEM7)                                                                    |
|           | c.541G>A (Glu181Lys)              | SKCM-metastatic                  | Melanoma (IGR39, IGR37)                                                                        |
|           | c.638delA (Asn213IlefsTer2)       | STAD                             | Colorectal cancer (CW2)                                                                        |
|           | c.1160G>A (Gly387Glu)             | SKCM-metastatic                  | Cancer of unknown primary (MCC13)                                                              |
|           | c.1306C>T (Pro436Ser)             | SKCM-metastatic                  | Melanoma (COLO792)                                                                             |
|           | c.1340G>T (Arg447Ile)             | UCEC                             | Endometrial cancer (ESS1)                                                                      |

|      |                                                                                                                                                                                                          |                                                                                                                                                        |                                                                                                                                                                                                                                                                                                                                                                                                                                |
|------|----------------------------------------------------------------------------------------------------------------------------------------------------------------------------------------------------------|--------------------------------------------------------------------------------------------------------------------------------------------------------|--------------------------------------------------------------------------------------------------------------------------------------------------------------------------------------------------------------------------------------------------------------------------------------------------------------------------------------------------------------------------------------------------------------------------------|
| 2B7  | c.1405C>T (Arg469Cys)<br>c.1558A>G (Arg520Gly)<br>c.1096C>A (Pro366Thr)<br>c.1192G>A (Asp398Asn)<br>c.1340G>T (Arg447Ile)<br>c.1375C>T (Arg459Ter)<br>c.1444G>A (Asp482Asn)                              | LGG<br>LUSC<br>PRAD<br>LGG<br>UCEC<br>KICH<br>SKCM-primary                                                                                             | T-Lymphoblastic Leukemia/Lymphoma (MOLT16)<br>Blood cancer (KCL22)<br>Cancer of unknown primary (BB49HNC)                                                                                                                                                                                                                                                                                                                      |
| 2B10 | c.104G>A (Trp35Ter)<br>c.184C>A (Leu62Ile)<br>c.635delA (Asn212IlefsTer17)<br>c.1003C>A (Leu335Ile)<br>c.1300G>A (Asp434Asn)<br>c.1403G>A (Arg468His)<br>c.1412G>A (Gly471Glu)<br>c.1565G>A (Gly522Glu)  | SKCM-metastatic<br>OV<br>STAD<br>BRCA<br>SKCM-metastatic<br>HNSC<br>SKCM-metastatic<br>SKCM-metastatic                                                 | Colorectal cancer (RCM1); Blood cancer (KCL22)<br>Cancer of unknown primary (JEG3)<br>Colorectal cancer (HCT116)<br>Endometrial cancer (JHUEM7)<br>Cancer of unknown primary (HCC515)<br>Melanoma (COLO679, C32); Small cell lung cancer (NCIH2081)<br>Colorectal cancer (LS411N, SW48)<br>Endometrial cancer (ESS1)<br>Cancer of unknown primary (NCIH1688)<br>Cancer of unknown primary (HELA)<br>Mixed cancer types (MM370) |
| 2B11 | c.71G>A (Gly24Glu)<br>c.500G>A (Arg167Gln)<br>c.923C>A (Ser308Tyr)<br>c.932C>T (Ser311Leu)<br>c.1270G>T (Asp424Tyr)<br>c.1306C>T (Pro436Ser)<br>c.1567G>T (Gly523Trp)                                    | SKCM-metastatic<br>SKCM-primary<br>LUAD<br>UCEC<br>HNSC<br>LUAD<br>SKCM-metastatic                                                                     | Cancer of unknown primary (M14)<br>Cancer of unknown primary (MCC13)<br>Cancer of unknown primary (EB3)<br>Cancer of unknown primary (HCC2998)<br>Prostate cancer (LNCAPCLONEFGC)<br>Non-small cell lung cancer (EKVX)<br>Mixed cancer types (MM386)                                                                                                                                                                           |
| 2B15 | c.117G>A (Met39Ile)<br>c.283G>A (Asp95Asn)<br>c.332C>T (Ser111Leu)<br>c.521G>A (Arg174Gln)<br>c.1323G>T (Glu441Asp)<br>c.1354G>T (Asp452Tyr)<br>c.1458G>A (Trp486Ter)<br>c.790G>A (Asp264Asn)            | COAD<br>LUAD, SKCM-metastatic<br>SKCM-metastatic<br>SKCM-metastatic<br>CESC, COAD<br>STAD<br>LUAD<br>SKCM-metastatic                                   | Pancreatic cancer (HS766T)<br>Cancer of unknown primary (TASK1)<br>Melanoma (HS939T)<br>Melanoma (MEWO)<br>Colorectal cancer (SNU81)<br>Mature B-cell neoplasms (NAMALWA)<br>Non-small cell lung cancer (HCC1438)<br>Melanoma (MEWO)                                                                                                                                                                                           |
| 2B17 | c.329C>T (Ser110Leu)                                                                                                                                                                                     | SKCM-primary                                                                                                                                           | Cancer of unknown primary (MDAMB330)                                                                                                                                                                                                                                                                                                                                                                                           |
| 2B28 | c.352G>A (Glu118Lys)<br>c.462delT (Pro155Leufster33)<br>c.463C>T (Pro155Ser)<br>c.901G>A (Glu301Lys)<br>c.1198C>A (Pro400Thr)<br>c.1262C>T (Ser421Leu)<br>c.1329G>A (Met443Ile)<br>c.1375C>T (Arg459Ter) | SKCM-metastatic<br>SKCM (primary, Metastatic)<br>STAD<br>SKCM-metastatic<br>SKCM-metastatic<br>LUAD<br>GBM, LUSC<br>SKCM-metastatic<br>SKCM-metastatic | Cancer of unknown primary (SW684)<br>Cancer of unknown primary (SW684)<br>Colorectal cancer (RKO)<br>Cancer of unknown primary (NCIH1770)<br>Mixed cancer types (MM370)<br>Non-small cell lung cancer (NCIH1623)<br>Esophagogastric Cancer (KYSE140)<br>Esophagogastric Cancer (SNU1); Melanoma (MEWO)                                                                                                                         |
| 3A1  | c.37C>T (Leu13Phe)<br>c.70A>G (Lys24Glu)                                                                                                                                                                 | SKCM-metastatic<br>LUAD                                                                                                                                | Cancer of unknown primary (SW684)<br>Colorectal cancer (SNU175); Cancer of unknown primary (SW872)<br>Cancer of unknown primary (LNZTA3WT4)                                                                                                                                                                                                                                                                                    |

|      |                                                                                                                                                                                                                                               |                                                                                                                                                                     |                                                                                                                                                                                                                                                                                                                                                                                                                                                                               |
|------|-----------------------------------------------------------------------------------------------------------------------------------------------------------------------------------------------------------------------------------------------|---------------------------------------------------------------------------------------------------------------------------------------------------------------------|-------------------------------------------------------------------------------------------------------------------------------------------------------------------------------------------------------------------------------------------------------------------------------------------------------------------------------------------------------------------------------------------------------------------------------------------------------------------------------|
| 3A2  | c.211G>A (Glu71Lys)<br>c.490G>A (Ala164Thr)<br>c.1378G>A (Asp460Asn)<br>c.218C>T (Ser73Leu)<br>c.262G>T (Glu88Ter)<br>c.364A>G (Ser122Gly)<br>c.452C>T (Pro151Leu)<br>c.1091G>A (Arg364His)<br>c.1406C>T (Thr469Met)<br>c.1544G>A (Arg515His) | SKCM (primary, Metastatic)<br>COAD<br>BLCA, SKCM-metastatic<br>SKCM-metastatic<br>UCEC<br>LUSC<br>LUSC, SKCM-metastatic<br>GBM<br>BRCA, GBM, LGG, LUAD<br>COAD, GBM | Colorectal cancer (MDST8)<br>Mature B-cell neoplasms (U266B1)<br>Colorectal cancer (SNU81)<br>Cancer of unknown primary (SARC9371)<br>Colorectal cancer (HT115)<br>Cancer of unknown primary (NCIH513)<br>Melanoma (WM793)<br>Endometrial cancer (HEC1A)<br>Cancer of unknown primary (BN6)<br>Colorectal cancer (SW403)<br>B-Lymphoblastic Leukemia/Lymphoma (NAML6)<br>Cancer of unknown primary (D247MG)<br>Endometrial cancer (RL952)<br>Esophagogastric Cancer (2313287) |
| UGT8 | c.187G>A (Ala63Thr)<br>c.559C>T (Arg187Cys)<br>c.1053G>T (Lys351Asn)<br>c.1421dupT (Leu474PhefsTer36)                                                                                                                                         | STAD<br>LUSC<br>UCEC<br>COAD                                                                                                                                        |                                                                                                                                                                                                                                                                                                                                                                                                                                                                               |
