# Supplementary material for: The Somatic Mutation Landscape of UDP-Glycosyltransferase (UGT) Genes in Human Cancers
Source: MDPI journal article supplement (doi:10.3390/cancers14225708), 2022-11-21
Supplement: s1 [file s1]

Table S7. Mutations at 3' untranslated regions (UTRs) of *UGT* genes in TCGA tumors. Mutations in functional miRNA seed target sites are in bold.

| 1As                                                                                                             | 2As                                                                       | 2A3                                                                                                                                 | 2B4                                                                                                                                                                                                                                                                                           | 2B7                                                                                                                                                                                     | 2B10                                                                                                                                                                                                                                           | 2B11                                                                                        | 2B15                                                                                                                                                                                                                                                                                                                                            | 2B28                                                                                                         | 3A1                                                                                                                                                                                                                                                                                                                                                         | 3A2                                                                                                                                                                                                                                                             | UGT8                                                                   |
|-----------------------------------------------------------------------------------------------------------------|---------------------------------------------------------------------------|-------------------------------------------------------------------------------------------------------------------------------------|-----------------------------------------------------------------------------------------------------------------------------------------------------------------------------------------------------------------------------------------------------------------------------------------------|-----------------------------------------------------------------------------------------------------------------------------------------------------------------------------------------|------------------------------------------------------------------------------------------------------------------------------------------------------------------------------------------------------------------------------------------------|---------------------------------------------------------------------------------------------|-------------------------------------------------------------------------------------------------------------------------------------------------------------------------------------------------------------------------------------------------------------------------------------------------------------------------------------------------|--------------------------------------------------------------------------------------------------------------|-------------------------------------------------------------------------------------------------------------------------------------------------------------------------------------------------------------------------------------------------------------------------------------------------------------------------------------------------------------|-----------------------------------------------------------------------------------------------------------------------------------------------------------------------------------------------------------------------------------------------------------------|------------------------------------------------------------------------|
| c.*1G>C<br>c.*37T>C<br>c.*46A>G<br>c.*65G>T<br><b>c.*70A&gt;T</b><br><b>c.*74T&gt;A</b><br>c.*78A>C<br>c.*85T>C | c.*15G>A<br>c.*15G>A<br>c.*20A>G<br>c.*21T>C<br>c.*27_*28insA<br>c.*45T>C | c.*5T>A<br>c.*26G>C<br>c.*58G>A<br>c.*63dupT<br>c.*67G>T<br>c.*67G>A<br>c.*96T>C<br>c.*97C>A<br>c.*123C>G<br>c.*138C>A<br>c.*163C>A | c.*4C>T<br>c.*5G>A<br>c.*16G>A<br>c.*23G>T<br>c.*24G>A<br>c.*38G>T<br>c.*38G>T<br>c.*41C>A<br>c.*43C>T<br>c.*43C>T<br>c.*69G>T<br>c.*83G> <b>T</b><br><b>c.*83G&gt;A</b><br>c.*90T>G<br>c.*110C>T<br>c.*114C>G<br>c.*118A>T<br>c.*124C>A<br>c.*124C>A<br>c.*131A>C<br>c.*209dupA<br>c.*267T>C | c.*14T>C<br>c.*35G>T<br>c.*35G>A<br>c.*57C>T<br>c.*58C>A<br>c.*61C>T<br>c.*64G>A<br>c.*75A>G<br>c.*86C>A<br>c.*106A>G<br>c.*108A>G<br>c.*111A>G<br>c.*136T>G<br>c.*151A>C<br>c.*236delA | c.*4T>A<br>c.*8T>G<br>c.*9G>C<br>c.*11G>A<br>c.*26_*42del<br>c.*58C>A<br>c.*78C>A<br>c.*84T>G<br>c.*86C>T<br>c.*93C>T<br>c.*109dupA<br>c.*109delA<br>c.*109delA<br>c.*109delA<br>c.*116C>T<br>c.*116C>T<br>c.*117G>A<br>c.*117G>A<br>c.*120G>A | c.*5G>A<br>c.*23G>A<br>c.*64G>A<br>c.*73G>T<br>c.*73G>T<br>c.*75T>C<br>c.*86G>T<br>c.*99C>A | c.*7C>T<br>c.*7_*14dupCAAAAGCC<br>c.*16G>A<br>c.*16G>A<br>c.*29T>C<br>c.*29T>C<br>c.*30G>A<br>c.*34G>C<br>c.*46C>T<br>c.*54T>G<br>c.*62G>A<br>c.*76G>A<br>c.*76G>A<br>c.*78G>A<br>c.*79G>A<br>c.*79G>A<br>c.*84C>T<br>c.*84C>T<br>c.*84C>T<br>c.*89T>G<br>c.*91C>T<br>c.*95T>C<br>c.*109T>G<br>c.*128A>G<br>c.*136T>C<br>c.*139A>G<br>c.*233G>T | c.*8T>G<br>c.*23G>A<br>c.*31G>A<br>c.*35G>A<br>c.*122C>G<br>c.*167C>G<br>c.*171C>T<br>c.*194G>A<br>c.*205G>T | c.*7G>A<br>c.*7G>T<br>c.*17G>T<br>c.*18G>T<br>c.*23G>A<br>c.*25G>T<br>c.*26G>T<br>c.*33T>G<br>c.*34C>T<br>c.*34C>T<br>c.*35C>T<br>c.*36C>T<br>c.*37T>C<br>c.*39G>T<br>c.*41C>G<br>c.*42C>T<br>c.*50G>A<br>c.*57C>A<br>c.*58C>T<br>c.*60C>A<br>c.*61C>G<br>c.*61C>A<br>c.*62C>T<br>c.*70C>T<br>c.*78C>T<br>c.*126C>T<br>c.*135C>A<br>c.*141C>A<br>c.*190dupT | c.*6G>T<br>c.*20G>A<br>c.*20G>A<br>c.*21G>A<br>c.*23dupG<br>c.*28T>C<br>c.*35G>T<br>c.*35G>A<br>c.*37C>T<br>c.*37C>T<br>c.*38G>A<br>c.*43C>T<br>c.*56G>A<br>c.*62C>T<br>c.*91G>T<br>c.*113T>G<br>c.*118G>T<br>c.*127G>A<br>c.*132delA<br>c.*159C>A<br>c.*184A>C | c.*13G>C<br>c.*20G>T<br>c.*38C>G<br>c.*75A>G<br>c.*274G>C<br>c.*379G>T |

\*: stop codon
