# Supplementary material for: The Somatic Mutation Landscape of UDP-Glycosyltransferase (UGT) Genes in Human Cancers
Source: Cancers (Basel). 2022 Nov 21;14(22):5708. doi: 10.3390/cancers14225708 (PMC9688768; doi:10.3390/cancers14225708)
Supplement: Supplementary file 1 [file cancers-14-05708-s001.zip › Table S1.xlsx]

## Sheet: Title
Table S1: The tumors for each of the 33 different types of TCGA cancers that were included in the analysis of this study.

## Sheet: ACC
cancer type		CDR ID	Tumor_Sample_Barcode	Matched_Norm_Sample_Barcode
ACC	1	TCGA-OR-A5J1	TCGA-OR-A5J1-01A-11D-A29I-10	TCGA-OR-A5J1-10A-01D-A29L-10
ACC	1	TCGA-OR-A5J2	TCGA-OR-A5J2-01A-11D-A29I-10	TCGA-OR-A5J2-10A-01D-A29L-10
ACC	1	TCGA-OR-A5J3	TCGA-OR-A5J3-01A-11D-A29I-10	TCGA-OR-A5J3-10A-01D-A29L-10
ACC	1	TCGA-OR-A5J4	TCGA-OR-A5J4-01A-11D-A29I-10	TCGA-OR-A5J4-10A-01D-A29L-10
ACC	1	TCGA-OR-A5J5	TCGA-OR-A5J5-01A-11D-A29I-10	TCGA-OR-A5J5-10A-01D-A29L-10
ACC	1	TCGA-OR-A5J6	TCGA-OR-A5J6-01A-31D-A29I-10	TCGA-OR-A5J6-10A-01D-A29L-10
ACC	1	TCGA-OR-A5J7	TCGA-OR-A5J7-01A-11D-A29I-10	TCGA-OR-A5J7-10A-01D-A29L-10
ACC	1	TCGA-OR-A5J8	TCGA-OR-A5J8-01A-11D-A29I-10	TCGA-OR-A5J8-10A-01D-A29L-10
ACC	1	TCGA-OR-A5J9	TCGA-OR-A5J9-01A-11D-A29I-10	TCGA-OR-A5J9-10A-01D-A29L-10
ACC	1	TCGA-OR-A5JA	TCGA-OR-A5JA-01A-11D-A29I-10	TCGA-OR-A5JA-10A-01D-A29L-10
ACC	1	TCGA-OR-A5JB	TCGA-OR-A5JB-01A-11D-A29I-10	TCGA-OR-A5JB-10A-01D-A29L-10
ACC	1	TCGA-OR-A5JC	TCGA-OR-A5JC-01A-11D-A29I-10	TCGA-OR-A5JC-10A-01D-A29L-10
ACC	1	TCGA-OR-A5JD	TCGA-OR-A5JD-01A-11D-A29I-10	TCGA-OR-A5JD-10B-01D-A29L-10
ACC	1	TCGA-OR-A5JE	TCGA-OR-A5JE-01A-11D-A29I-10	TCGA-OR-A5JE-10A-01D-A29L-10
ACC	1	TCGA-OR-A5JF	TCGA-OR-A5JF-01A-11D-A29I-10	TCGA-OR-A5JF-10A-01D-A29L-10
ACC	1	TCGA-OR-A5JG	TCGA-OR-A5JG-01A-11D-A29I-10	TCGA-OR-A5JG-10A-01D-A29L-10
ACC	1	TCGA-OR-A5JH	TCGA-OR-A5JH-01A-11D-A30A-10	TCGA-OR-A5JH-10A-01D-A30A-10
ACC	1	TCGA-OR-A5JI	TCGA-OR-A5JI-01A-11D-A29I-10	TCGA-OR-A5JI-10A-01D-A29L-10
ACC	1	TCGA-OR-A5JJ	TCGA-OR-A5JJ-01A-11D-A29I-10	TCGA-OR-A5JJ-10A-01D-A29L-10
ACC	1	TCGA-OR-A5JK	TCGA-OR-A5JK-01A-11D-A29I-10	TCGA-OR-A5JK-10A-01D-A29L-10
ACC	1	TCGA-OR-A5JL	TCGA-OR-A5JL-01A-11D-A29I-10	TCGA-OR-A5JL-10A-01D-A29L-10
ACC	1	TCGA-OR-A5JM	TCGA-OR-A5JM-01A-11D-A29I-10	TCGA-OR-A5JM-10B-01D-A29L-10
ACC	1	TCGA-OR-A5JO	TCGA-OR-A5JO-01A-11D-A29I-10	TCGA-OR-A5JO-10A-01D-A29L-10
ACC	1	TCGA-OR-A5JP	TCGA-OR-A5JP-01A-11D-A29I-10	TCGA-OR-A5JP-10A-01D-A29L-10
ACC	1	TCGA-OR-A5JQ	TCGA-OR-A5JQ-01A-11D-A29I-10	TCGA-OR-A5JQ-10A-01D-A29L-10
ACC	1	TCGA-OR-A5JR	TCGA-OR-A5JR-01A-11D-A29I-10	TCGA-OR-A5JR-10A-01D-A29L-10
ACC	1	TCGA-OR-A5JS	TCGA-OR-A5JS-01A-11D-A29I-10	TCGA-OR-A5JS-10A-01D-A29L-10
ACC	1	TCGA-OR-A5JT	TCGA-OR-A5JT-01A-11D-A29I-10	TCGA-OR-A5JT-10A-01D-A29L-10
ACC	1	TCGA-OR-A5JU	TCGA-OR-A5JU-01A-11D-A30A-10	TCGA-OR-A5JU-10A-01D-A30A-10
ACC	1	TCGA-OR-A5JV	TCGA-OR-A5JV-01A-11D-A29I-10	TCGA-OR-A5JV-10A-01D-A29L-10
ACC	1	TCGA-OR-A5JW	TCGA-OR-A5JW-01A-11D-A29I-10	TCGA-OR-A5JW-10A-01D-A29L-10
ACC	1	TCGA-OR-A5JX	TCGA-OR-A5JX-01A-11D-A29I-10	TCGA-OR-A5JX-10B-01D-A29L-10
ACC	1	TCGA-OR-A5JY	TCGA-OR-A5JY-01A-31D-A29I-10	TCGA-OR-A5JY-10A-01D-A29L-10
ACC	1	TCGA-OR-A5JZ	TCGA-OR-A5JZ-01A-11D-A29I-10	TCGA-OR-A5JZ-10A-01D-A29L-10
ACC	1	TCGA-OR-A5K0	TCGA-OR-A5K0-01A-11D-A29I-10	TCGA-OR-A5K0-10B-01D-A29L-10
ACC	1	TCGA-OR-A5K1	TCGA-OR-A5K1-01A-11D-A29I-10	TCGA-OR-A5K1-10A-01D-A29L-10
ACC	1	TCGA-OR-A5K2	TCGA-OR-A5K2-01A-11D-A29I-10	TCGA-OR-A5K2-10B-01D-A29L-10
ACC	1	TCGA-OR-A5K3	TCGA-OR-A5K3-01A-11D-A29I-10	TCGA-OR-A5K3-10A-01D-A29L-10
ACC	1	TCGA-OR-A5K4	TCGA-OR-A5K4-01A-11D-A29I-10	TCGA-OR-A5K4-10A-01D-A29L-10
ACC	1	TCGA-OR-A5K5	TCGA-OR-A5K5-01A-11D-A29I-10	TCGA-OR-A5K5-10A-01D-A29L-10
ACC	1	TCGA-OR-A5K6	TCGA-OR-A5K6-01A-11D-A29I-10	TCGA-OR-A5K6-10A-01D-A29L-10
ACC	1	TCGA-OR-A5K8	TCGA-OR-A5K8-01A-11D-A29I-10	TCGA-OR-A5K8-10A-01D-A29L-10
ACC	1	TCGA-OR-A5K9	TCGA-OR-A5K9-01A-11D-A29I-10	TCGA-OR-A5K9-11A-11D-A29L-10
ACC	1	TCGA-OR-A5KB	TCGA-OR-A5KB-01A-11D-A30A-10	TCGA-OR-A5KB-11A-11D-A30A-10
ACC	1	TCGA-OR-A5KO	TCGA-OR-A5KO-01A-11D-A29I-10	TCGA-OR-A5KO-10A-01D-A29L-10
ACC	1	TCGA-OR-A5KP	TCGA-OR-A5KP-01A-11D-A30A-10	TCGA-OR-A5KP-10A-01D-A30A-10
ACC	1	TCGA-OR-A5KQ	TCGA-OR-A5KQ-01A-11D-A30A-10	TCGA-OR-A5KQ-10A-01D-A30A-10
ACC	1	TCGA-OR-A5KS	TCGA-OR-A5KS-01A-11D-A30A-10	TCGA-OR-A5KS-10A-01D-A30A-10
ACC	1	TCGA-OR-A5KT	TCGA-OR-A5KT-01A-11D-A29I-10	TCGA-OR-A5KT-10A-01D-A29L-10
ACC	1	TCGA-OR-A5KU	TCGA-OR-A5KU-01A-11D-A29I-10	TCGA-OR-A5KU-10A-01D-A29L-10
ACC	1	TCGA-OR-A5KV	TCGA-OR-A5KV-01A-11D-A29I-10	TCGA-OR-A5KV-10A-01D-A29L-10
ACC	1	TCGA-OR-A5KW	TCGA-OR-A5KW-01A-11D-A29I-10	TCGA-OR-A5KW-10A-01D-A29L-10
ACC	1	TCGA-OR-A5KX	TCGA-OR-A5KX-01A-11D-A29I-10	TCGA-OR-A5KX-10A-01D-A29L-10
ACC	1	TCGA-OR-A5KY	TCGA-OR-A5KY-01A-11D-A29I-10	TCGA-OR-A5KY-10A-01D-A29L-10
ACC	1	TCGA-OR-A5KZ	TCGA-OR-A5KZ-01A-11D-A29I-10	TCGA-OR-A5KZ-10A-01D-A29L-10
ACC	1	TCGA-OR-A5L1	TCGA-OR-A5L1-01A-11D-A30A-10	TCGA-OR-A5L1-10A-01D-A30A-10
ACC	1	TCGA-OR-A5L2	TCGA-OR-A5L2-01A-11D-A30A-10	TCGA-OR-A5L2-10A-01D-A30A-10
ACC	1	TCGA-OR-A5L3	TCGA-OR-A5L3-01A-11D-A29I-10	TCGA-OR-A5L3-10A-01D-A29L-10
ACC	1	TCGA-OR-A5L4	TCGA-OR-A5L4-01A-11D-A29I-10	TCGA-OR-A5L4-10A-01D-A29L-10
ACC	1	TCGA-OR-A5L5	TCGA-OR-A5L5-01A-11D-A29I-10	TCGA-OR-A5L5-10A-01D-A29L-10
ACC	1	TCGA-OR-A5L6	TCGA-OR-A5L6-01A-11D-A29I-10	TCGA-OR-A5L6-10C-01D-A29L-10
ACC	1	TCGA-OR-A5L8	TCGA-OR-A5L8-01A-11D-A29I-10	TCGA-OR-A5L8-10A-01D-A29L-10
ACC	1	TCGA-OR-A5L9	TCGA-OR-A5L9-01A-11D-A29I-10	TCGA-OR-A5L9-10B-01D-A29L-10
ACC	1	TCGA-OR-A5LA	TCGA-OR-A5LA-01A-11D-A29I-10	TCGA-OR-A5LA-10A-01D-A29L-10
ACC	1	TCGA-OR-A5LB	TCGA-OR-A5LB-01A-11D-A29I-10	TCGA-OR-A5LB-10A-01D-A29L-10
ACC	1	TCGA-OR-A5LC	TCGA-OR-A5LC-01A-11D-A29I-10	TCGA-OR-A5LC-10A-01D-A29L-10
ACC	1	TCGA-OR-A5LD	TCGA-OR-A5LD-01A-11D-A29I-10	TCGA-OR-A5LD-10A-01D-A29L-10
ACC	1	TCGA-OR-A5LE	TCGA-OR-A5LE-01A-11D-A29I-10	TCGA-OR-A5LE-10A-01D-A29L-10
ACC	1	TCGA-OR-A5LF	TCGA-OR-A5LF-01A-11D-A30A-10	TCGA-OR-A5LF-10A-01D-A30A-10
ACC	1	TCGA-OR-A5LG	TCGA-OR-A5LG-01A-11D-A29I-10	TCGA-OR-A5LG-10A-01D-A29L-10
ACC	1	TCGA-OR-A5LH	TCGA-OR-A5LH-01A-11D-A29I-10	TCGA-OR-A5LH-10A-01D-A29L-10
ACC	1	TCGA-OR-A5LI	TCGA-OR-A5LI-01A-11D-A30A-10	TCGA-OR-A5LI-10A-01D-A30A-10
ACC	1	TCGA-OR-A5LJ	TCGA-OR-A5LJ-01A-11D-A29I-10	TCGA-OR-A5LJ-10A-01D-A29L-10
ACC	1	TCGA-OR-A5LK	TCGA-OR-A5LK-01A-11D-A29I-10	TCGA-OR-A5LK-10A-01D-A29L-10
ACC	1	TCGA-OR-A5LL	TCGA-OR-A5LL-01A-11D-A29I-10	TCGA-OR-A5LL-10A-01D-A29L-10
ACC	1	TCGA-OR-A5LM	TCGA-OR-A5LM-01A-11D-A29I-10	TCGA-OR-A5LM-10A-01D-A29L-10
ACC	1	TCGA-OR-A5LN	TCGA-OR-A5LN-01A-11D-A29I-10	TCGA-OR-A5LN-10A-01D-A29L-10
ACC	1	TCGA-OR-A5LO	TCGA-OR-A5LO-01A-11D-A29I-10	TCGA-OR-A5LO-10A-01D-A29L-10
ACC	1	TCGA-OR-A5LP	TCGA-OR-A5LP-01A-11D-A29I-10	TCGA-OR-A5LP-10A-01D-A29L-10
ACC	1	TCGA-OR-A5LR	TCGA-OR-A5LR-01A-11D-A29I-10	TCGA-OR-A5LR-10A-01D-A29L-10
ACC	1	TCGA-OR-A5LS	TCGA-OR-A5LS-01A-11D-A29I-10	TCGA-OR-A5LS-10A-01D-A29L-10
ACC	1	TCGA-OR-A5LT	TCGA-OR-A5LT-01A-11D-A29I-10	TCGA-OR-A5LT-10A-01D-A29L-10
ACC	1	TCGA-OU-A5PI	TCGA-OU-A5PI-01A-12D-A29I-10	TCGA-OU-A5PI-10A-01D-A29L-10
ACC	1	TCGA-P6-A5OF	TCGA-P6-A5OF-01A-11D-A29I-10	TCGA-P6-A5OF-10A-01D-A29L-10
ACC	1	TCGA-P6-A5OG	TCGA-P6-A5OG-01A-22D-A29I-10	TCGA-P6-A5OG-10A-01D-A29L-10
ACC	1	TCGA-P6-A5OH	TCGA-P6-A5OH-01A-11D-A30A-10	TCGA-P6-A5OH-11A-01D-A30A-10
ACC	1	TCGA-PA-A5YG	TCGA-PA-A5YG-01A-11D-A29I-10	TCGA-PA-A5YG-10A-01D-A29L-10
ACC	1	TCGA-PK-A5H8	TCGA-PK-A5H8-01A-11D-A29I-10	TCGA-PK-A5H8-10A-01D-A29L-10
ACC	1	TCGA-PK-A5H9	TCGA-PK-A5H9-01A-11D-A29I-10	TCGA-PK-A5H9-10A-01D-A29L-10
ACC	1	TCGA-PK-A5HA	TCGA-PK-A5HA-01A-11D-A29I-10	TCGA-PK-A5HA-10A-01D-A29L-10
ACC	1	TCGA-PK-A5HB	TCGA-PK-A5HB-01A-11D-A29I-10	TCGA-PK-A5HB-11A-11D-A29L-10
ACC	1	TCGA-PK-A5HC	TCGA-PK-A5HC-01A-11D-A30A-10	TCGA-PK-A5HC-11A-11D-A30A-10

## Sheet: BLCA
cancer type	CDR list	Tumor_Sample_Barcode	Matched_Norm_Sample_Barcode
BLCA	TCGA-2F-A9KO	TCGA-2F-A9KO-01A-11D-A38G-08	TCGA-2F-A9KO-11A-12D-A38J-08
BLCA	TCGA-2F-A9KP	TCGA-2F-A9KP-01A-11D-A38G-08	TCGA-2F-A9KP-10A-01D-A38J-08
BLCA	TCGA-2F-A9KQ	TCGA-2F-A9KQ-01A-11D-A38G-08	TCGA-2F-A9KQ-11A-11D-A38J-08
BLCA	TCGA-2F-A9KR	TCGA-2F-A9KR-01A-11D-A38G-08	TCGA-2F-A9KR-10A-01D-A38J-08
BLCA	TCGA-2F-A9KT	TCGA-2F-A9KT-01A-11D-A38G-08	TCGA-2F-A9KT-10A-01D-A38J-08
BLCA	TCGA-2F-A9KW	TCGA-2F-A9KW-01A-11D-A38G-08	TCGA-2F-A9KW-10A-01D-A38J-08
BLCA	TCGA-4Z-AA7M	TCGA-4Z-AA7M-01A-11D-A391-08	TCGA-4Z-AA7M-10A-01D-A394-08
BLCA	TCGA-4Z-AA7N	TCGA-4Z-AA7N-01A-11D-A391-08	TCGA-4Z-AA7N-10A-01D-A394-08
BLCA	TCGA-4Z-AA7O	TCGA-4Z-AA7O-01A-31D-A391-08	TCGA-4Z-AA7O-10A-01D-A394-08
BLCA	TCGA-4Z-AA7Q	TCGA-4Z-AA7Q-01A-11D-A391-08	TCGA-4Z-AA7Q-10A-01D-A394-08
BLCA	TCGA-4Z-AA7R	TCGA-4Z-AA7R-01A-11D-A391-08	TCGA-4Z-AA7R-10A-01D-A394-08
BLCA	TCGA-4Z-AA7S	TCGA-4Z-AA7S-01A-11D-A391-08	TCGA-4Z-AA7S-10A-01D-A394-08
BLCA	TCGA-4Z-AA7W	TCGA-4Z-AA7W-01A-11D-A391-08	TCGA-4Z-AA7W-10A-01D-A394-08
BLCA	TCGA-4Z-AA7Y	TCGA-4Z-AA7Y-01A-11D-A391-08	TCGA-4Z-AA7Y-10A-01D-A394-08
BLCA	TCGA-4Z-AA80	TCGA-4Z-AA80-01A-11D-A391-08	TCGA-4Z-AA80-10A-01D-A394-08
BLCA	TCGA-4Z-AA81	TCGA-4Z-AA81-01A-11D-A391-08	TCGA-4Z-AA81-10A-01D-A394-08
BLCA	TCGA-4Z-AA82	TCGA-4Z-AA82-01A-11D-A391-08	TCGA-4Z-AA82-10A-01D-A394-08
BLCA	TCGA-4Z-AA83	TCGA-4Z-AA83-01A-11D-A391-08	TCGA-4Z-AA83-10A-01D-A394-08
BLCA	TCGA-4Z-AA84	TCGA-4Z-AA84-01A-11D-A391-08	TCGA-4Z-AA84-10A-01D-A394-08
BLCA	TCGA-4Z-AA86	TCGA-4Z-AA86-01A-11D-A391-08	TCGA-4Z-AA86-10A-01D-A394-08
BLCA	TCGA-4Z-AA87	TCGA-4Z-AA87-01A-11D-A391-08	TCGA-4Z-AA87-10A-01D-A394-08
BLCA	TCGA-4Z-AA89	TCGA-4Z-AA89-01A-11D-A391-08	TCGA-4Z-AA89-10A-01D-A394-08
BLCA	TCGA-5N-A9KI	TCGA-5N-A9KI-01A-31D-A42E-08	TCGA-5N-A9KI-10A-01D-A42H-08
BLCA	TCGA-5N-A9KM	TCGA-5N-A9KM-01A-11D-A42E-08	TCGA-5N-A9KM-10A-01D-A42H-08
BLCA	TCGA-BL-A0C8	TCGA-BL-A0C8-01A-11D-A271-08	TCGA-BL-A0C8-10A-01D-A271-08
BLCA	TCGA-BL-A13I	TCGA-BL-A13I-01A-11D-A271-08	TCGA-BL-A13I-10A-01D-A271-08
BLCA	TCGA-BL-A13J	TCGA-BL-A13J-01A-11D-A271-08	TCGA-BL-A13J-10A-01D-A271-08
BLCA	TCGA-BL-A3JM	TCGA-BL-A3JM-01A-12D-A21A-08	TCGA-BL-A3JM-11A-31D-A21A-08
BLCA	TCGA-BL-A5ZZ	TCGA-BL-A5ZZ-01A-31D-A30E-08	TCGA-BL-A5ZZ-10A-01D-A30H-08
BLCA	TCGA-BT-A0S7	TCGA-BT-A0S7-01A-11D-A10S-08	TCGA-BT-A0S7-10A-01D-A10S-08
BLCA	TCGA-BT-A0YX	TCGA-BT-A0YX-01A-11D-A10S-08	TCGA-BT-A0YX-10A-01D-A10S-08
BLCA	TCGA-BT-A20J	TCGA-BT-A20J-01A-11D-A14W-08	TCGA-BT-A20J-11A-11D-A14W-08
BLCA	TCGA-BT-A20N	TCGA-BT-A20N-01A-11D-A14W-08	TCGA-BT-A20N-11A-11D-A14W-08
BLCA	TCGA-BT-A20O	TCGA-BT-A20O-01A-21D-A14W-08	TCGA-BT-A20O-11A-11D-A14W-08
BLCA	TCGA-BT-A20P	TCGA-BT-A20P-01A-11D-A14W-08	TCGA-BT-A20P-11A-11D-A14W-08
BLCA	TCGA-BT-A20Q	TCGA-BT-A20Q-01A-11D-A14W-08	TCGA-BT-A20Q-11A-11D-A14W-08
BLCA	TCGA-BT-A20R	TCGA-BT-A20R-01A-12D-A16O-08	TCGA-BT-A20R-11A-11D-A16O-08
BLCA	TCGA-BT-A20T	TCGA-BT-A20T-01A-11D-A14W-08	TCGA-BT-A20T-11A-11D-A14W-08
BLCA	TCGA-BT-A20U	TCGA-BT-A20U-01A-11D-A14W-08	TCGA-BT-A20U-11A-11D-A14W-08
BLCA	TCGA-BT-A20V	TCGA-BT-A20V-01A-11D-A14W-08	TCGA-BT-A20V-11A-11D-A14W-08
BLCA	TCGA-BT-A20W	TCGA-BT-A20W-01A-21D-A14W-08	TCGA-BT-A20W-11A-11D-A14W-08
BLCA	TCGA-BT-A20X	TCGA-BT-A20X-01A-11D-A16O-08	TCGA-BT-A20X-11A-12D-A16O-08
BLCA	TCGA-BT-A2LA	TCGA-BT-A2LA-01A-11D-A18F-08	TCGA-BT-A2LA-11A-11D-A18F-08
BLCA	TCGA-BT-A2LB	TCGA-BT-A2LB-01A-11D-A18F-08	TCGA-BT-A2LB-10A-01D-A18F-08
BLCA	TCGA-BT-A2LD	TCGA-BT-A2LD-01A-12D-A20D-08	TCGA-BT-A2LD-10A-01D-A20D-08
BLCA	TCGA-BT-A3PH	TCGA-BT-A3PH-01A-11D-A21Z-08	TCGA-BT-A3PH-10A-01D-A21Z-08
BLCA	TCGA-BT-A3PJ	TCGA-BT-A3PJ-01A-21D-A21Z-08	TCGA-BT-A3PJ-10A-01D-A21Z-08
BLCA	TCGA-BT-A3PK	TCGA-BT-A3PK-01A-21D-A21Z-08	TCGA-BT-A3PK-10A-01D-A21Z-08
BLCA	TCGA-BT-A42B	TCGA-BT-A42B-01A-32D-A23M-08	TCGA-BT-A42B-10A-01D-A23K-08
BLCA	TCGA-BT-A42C	TCGA-BT-A42C-01A-11D-A23M-08	TCGA-BT-A42C-10A-01D-A23K-08
BLCA	TCGA-BT-A42E	TCGA-BT-A42E-01A-11D-A23U-08	TCGA-BT-A42E-10A-01D-A23U-08
BLCA	TCGA-BT-A42F	TCGA-BT-A42F-01A-11D-A23U-08	TCGA-BT-A42F-10A-01D-A23U-08
BLCA	TCGA-C4-A0EZ	TCGA-C4-A0EZ-01A-21D-A10S-08	TCGA-C4-A0EZ-10A-01D-A10S-08
BLCA	TCGA-C4-A0F0	TCGA-C4-A0F0-01A-12D-A10S-08	TCGA-C4-A0F0-10A-01D-A10S-08
BLCA	TCGA-C4-A0F1	TCGA-C4-A0F1-01A-11D-A10S-08	TCGA-C4-A0F1-10A-01D-A10S-08
BLCA	TCGA-C4-A0F6	TCGA-C4-A0F6-01A-11D-A10S-08	TCGA-C4-A0F6-10A-01D-A10S-08
BLCA	TCGA-C4-A0F7	TCGA-C4-A0F7-01A-11D-A10S-08	TCGA-C4-A0F7-10A-01D-A10S-08
BLCA	TCGA-CF-A1HR	TCGA-CF-A1HR-01A-11D-A13W-08	TCGA-CF-A1HR-10A-01D-A13W-08
BLCA	TCGA-CF-A1HS	TCGA-CF-A1HS-01A-11D-A13W-08	TCGA-CF-A1HS-10A-01D-A13W-08
BLCA	TCGA-CF-A27C	TCGA-CF-A27C-01A-11D-A16O-08	TCGA-CF-A27C-10A-01D-A16O-08
BLCA	TCGA-CF-A3MF	TCGA-CF-A3MF-01A-12D-A21A-08	TCGA-CF-A3MF-10A-01D-A21A-08
BLCA	TCGA-CF-A3MG	TCGA-CF-A3MG-01A-11D-A20D-08	TCGA-CF-A3MG-10A-01D-A20D-08
BLCA	TCGA-CF-A3MH	TCGA-CF-A3MH-01A-11D-A20D-08	TCGA-CF-A3MH-10A-01D-A20D-08
BLCA	TCGA-CF-A3MI	TCGA-CF-A3MI-01A-11D-A20D-08	TCGA-CF-A3MI-10A-01D-A20D-08
BLCA	TCGA-CF-A47S	TCGA-CF-A47S-01A-11D-A23U-08	TCGA-CF-A47S-10A-01D-A23U-08
BLCA	TCGA-CF-A47T	TCGA-CF-A47T-01A-11D-A23U-08	TCGA-CF-A47T-10A-01D-A23U-08
BLCA	TCGA-CF-A47V	TCGA-CF-A47V-01A-11D-A23U-08	TCGA-CF-A47V-10A-01D-A23U-08
BLCA	TCGA-CF-A47W	TCGA-CF-A47W-01A-11D-A23U-08	TCGA-CF-A47W-10A-01D-A23U-08
BLCA	TCGA-CF-A47X	TCGA-CF-A47X-01A-31D-A23U-08	TCGA-CF-A47X-10A-01D-A23U-08
BLCA	TCGA-CF-A47Y	TCGA-CF-A47Y-01A-11D-A23U-08	TCGA-CF-A47Y-10A-01D-A23U-08
BLCA	TCGA-CF-A5U8	TCGA-CF-A5U8-01A-11D-A289-08	TCGA-CF-A5U8-10A-01D-A289-08
BLCA	TCGA-CF-A5UA	TCGA-CF-A5UA-01A-11D-A289-08	TCGA-CF-A5UA-10A-01D-A289-08
BLCA	TCGA-CF-A7I0	TCGA-CF-A7I0-01A-22D-A34U-08	TCGA-CF-A7I0-10A-01D-A34X-08
BLCA	TCGA-CF-A8HX	TCGA-CF-A8HX-01A-11D-A364-08	TCGA-CF-A8HX-10A-01D-A362-08
BLCA	TCGA-CF-A8HY	TCGA-CF-A8HY-01A-11D-A364-08	TCGA-CF-A8HY-10A-01D-A362-08
BLCA	TCGA-CF-A9FF	TCGA-CF-A9FF-01A-11D-A38G-08	TCGA-CF-A9FF-10A-01D-A38J-08
BLCA	TCGA-CF-A9FH	TCGA-CF-A9FH-01A-11D-A38G-08	TCGA-CF-A9FH-10A-01D-A38J-08
BLCA	TCGA-CF-A9FL	TCGA-CF-A9FL-01A-11D-A38G-08	TCGA-CF-A9FL-10A-01D-A38J-08
BLCA	TCGA-CF-A9FM	TCGA-CF-A9FM-01A-11D-A38G-08	TCGA-CF-A9FM-10A-01D-A38J-08
BLCA	TCGA-CU-A0YN	TCGA-CU-A0YN-01A-21D-A10S-08	TCGA-CU-A0YN-11A-11D-A10S-08
BLCA	TCGA-CU-A0YO	TCGA-CU-A0YO-01A-11D-A10S-08	TCGA-CU-A0YO-10A-01D-A10S-08
BLCA	TCGA-CU-A0YR	TCGA-CU-A0YR-01A-12D-A10S-08	TCGA-CU-A0YR-10A-01D-A10S-08
BLCA	TCGA-CU-A3KJ	TCGA-CU-A3KJ-01A-11D-A21A-08	TCGA-CU-A3KJ-10A-01D-A21A-08
BLCA	TCGA-CU-A3QU	TCGA-CU-A3QU-01A-11D-A22Z-08	TCGA-CU-A3QU-10B-01D-A22Z-08
BLCA	TCGA-CU-A3YL	TCGA-CU-A3YL-01A-11D-A22Z-08	TCGA-CU-A3YL-10A-01D-A22Z-08
BLCA	TCGA-CU-A5W6	TCGA-CU-A5W6-01A-11D-A289-08	TCGA-CU-A5W6-10A-01D-A289-08
BLCA	TCGA-CU-A72E	TCGA-CU-A72E-01A-12D-A339-08	TCGA-CU-A72E-10A-01D-A339-08
BLCA	TCGA-DK-A1A3	TCGA-DK-A1A3-01A-11D-A13W-08	TCGA-DK-A1A3-10A-01D-A13W-08
BLCA	TCGA-DK-A1A5	TCGA-DK-A1A5-01A-11D-A13W-08	TCGA-DK-A1A5-10A-01D-A13W-08
BLCA	TCGA-DK-A1A6	TCGA-DK-A1A6-06A-11D-A42E-08	TCGA-DK-A1A6-10A-01D-A13W-08
BLCA	TCGA-DK-A1A7	TCGA-DK-A1A7-01A-11D-A13W-08	TCGA-DK-A1A7-10A-01D-A13W-08
BLCA	TCGA-DK-A1AA	TCGA-DK-A1AA-01A-11D-A13W-08	TCGA-DK-A1AA-10A-01D-A13W-08
BLCA	TCGA-DK-A1AB	TCGA-DK-A1AB-01A-11D-A13W-08	TCGA-DK-A1AB-10A-01D-A13W-08
BLCA	TCGA-DK-A1AC	TCGA-DK-A1AC-01A-11D-A13W-08	TCGA-DK-A1AC-10A-01D-A13W-08
BLCA	TCGA-DK-A1AD	TCGA-DK-A1AD-01A-11D-A13W-08	TCGA-DK-A1AD-10A-01D-A13W-08
BLCA	TCGA-DK-A1AE	TCGA-DK-A1AE-01A-11D-A13W-08	TCGA-DK-A1AE-10A-01D-A13W-08
BLCA	TCGA-DK-A1AF	TCGA-DK-A1AF-01A-11D-A13W-08	TCGA-DK-A1AF-10A-01D-A13W-08
BLCA	TCGA-DK-A1AG	TCGA-DK-A1AG-01A-11D-A13W-08	TCGA-DK-A1AG-10A-01D-A13W-08
BLCA	TCGA-DK-A2HX	TCGA-DK-A2HX-01A-12D-A18F-08	TCGA-DK-A2HX-10A-01D-A18F-08
BLCA	TCGA-DK-A2I1	TCGA-DK-A2I1-01A-11D-A17V-08	TCGA-DK-A2I1-10A-01D-A17V-08
BLCA	TCGA-DK-A2I2	TCGA-DK-A2I2-01A-11D-A17V-08	TCGA-DK-A2I2-10A-01D-A17V-08
BLCA	TCGA-DK-A2I4	TCGA-DK-A2I4-01A-11D-A21A-08	TCGA-DK-A2I4-10A-01D-A21A-08
BLCA	TCGA-DK-A2I6	TCGA-DK-A2I6-01A-12D-A18F-08	TCGA-DK-A2I6-10A-01D-A18F-08
BLCA	TCGA-DK-A3IK	TCGA-DK-A3IK-01A-32D-A21A-08	TCGA-DK-A3IK-10A-01D-A21A-08
BLCA	TCGA-DK-A3IL	TCGA-DK-A3IL-01A-11D-A20D-08	TCGA-DK-A3IL-10A-01D-A20D-08
BLCA	TCGA-DK-A3IM	TCGA-DK-A3IM-01A-11D-A20D-08	TCGA-DK-A3IM-10A-01D-A20D-08
BLCA	TCGA-DK-A3IN	TCGA-DK-A3IN-01A-11D-A20D-08	TCGA-DK-A3IN-10A-01D-A20D-08
BLCA	TCGA-DK-A3IQ	TCGA-DK-A3IQ-01A-31D-A20D-08	TCGA-DK-A3IQ-10A-01D-A20D-08
BLCA	TCGA-DK-A3IS	TCGA-DK-A3IS-01A-21D-A21A-08	TCGA-DK-A3IS-10A-01D-A21A-08
BLCA	TCGA-DK-A3IT	TCGA-DK-A3IT-01A-31D-A20D-08	TCGA-DK-A3IT-10A-01D-A20D-08
BLCA	TCGA-DK-A3IU	TCGA-DK-A3IU-01A-11D-A20D-08	TCGA-DK-A3IU-10A-01D-A20D-08
BLCA	TCGA-DK-A3IV	TCGA-DK-A3IV-01A-22D-A21A-08	TCGA-DK-A3IV-10A-01D-A21A-08
BLCA	TCGA-DK-A3WW	TCGA-DK-A3WW-01A-22D-A23M-08	TCGA-DK-A3WW-10A-01D-A23K-08
BLCA	TCGA-DK-A3WX	TCGA-DK-A3WX-01A-22D-A22Z-08	TCGA-DK-A3WX-10A-01D-A22Z-08
BLCA	TCGA-DK-A3WY	TCGA-DK-A3WY-01A-11D-A22Z-08	TCGA-DK-A3WY-10A-01D-A22Z-08
BLCA	TCGA-DK-A3X1	TCGA-DK-A3X1-01A-12D-A22Z-08	TCGA-DK-A3X1-10A-01D-A22Z-08
BLCA	TCGA-DK-A3X2	TCGA-DK-A3X2-01A-11D-A22Z-08	TCGA-DK-A3X2-10A-01D-A22Z-08
BLCA	TCGA-DK-A6AV	TCGA-DK-A6AV-01A-12D-A30E-08	TCGA-DK-A6AV-10A-01D-A30H-08
BLCA	TCGA-DK-A6AW	TCGA-DK-A6AW-01A-11D-A30E-08	TCGA-DK-A6AW-10A-01D-A30H-08
BLCA	TCGA-DK-A6B0	TCGA-DK-A6B0-01A-11D-A31L-08	TCGA-DK-A6B0-10A-01D-A31J-08
BLCA	TCGA-DK-A6B1	TCGA-DK-A6B1-01A-12D-A30E-08	TCGA-DK-A6B1-10A-01D-A30H-08
BLCA	TCGA-DK-A6B2	TCGA-DK-A6B2-01A-11D-A30E-08	TCGA-DK-A6B2-10A-01D-A30H-08
BLCA	TCGA-DK-A6B5	TCGA-DK-A6B5-01A-11D-A31L-08	TCGA-DK-A6B5-10A-01D-A31J-08
BLCA	TCGA-DK-A6B6	TCGA-DK-A6B6-01A-11D-A30E-08	TCGA-DK-A6B6-10A-01D-A30H-08
BLCA	TCGA-DK-AA6L	TCGA-DK-AA6L-01A-11D-A391-08	TCGA-DK-AA6L-10A-01D-A394-08
BLCA	TCGA-DK-AA6M	TCGA-DK-AA6M-01A-11D-A391-08	TCGA-DK-AA6M-10A-01D-A394-08
BLCA	TCGA-DK-AA6P	TCGA-DK-AA6P-01A-11D-A391-08	TCGA-DK-AA6P-10A-01D-A394-08
BLCA	TCGA-DK-AA6Q	TCGA-DK-AA6Q-01A-11D-A391-08	TCGA-DK-AA6Q-10A-01D-A394-08
BLCA	TCGA-DK-AA6R	TCGA-DK-AA6R-01A-11D-A42E-08	TCGA-DK-AA6R-10A-01D-A42H-08
BLCA	TCGA-DK-AA6S	TCGA-DK-AA6S-01A-21D-A391-08	TCGA-DK-AA6S-10A-01D-A394-08
BLCA	TCGA-DK-AA6T	TCGA-DK-AA6T-01A-11D-A391-08	TCGA-DK-AA6T-10A-01D-A394-08
BLCA	TCGA-DK-AA6U	TCGA-DK-AA6U-01A-11D-A391-08	TCGA-DK-AA6U-10A-01D-A394-08
BLCA	TCGA-DK-AA6W	TCGA-DK-AA6W-01A-12D-A391-08	TCGA-DK-AA6W-10A-01D-A394-08
BLCA	TCGA-DK-AA6X	TCGA-DK-AA6X-01A-12D-A42E-08	TCGA-DK-AA6X-10A-01D-A42H-08
BLCA	TCGA-DK-AA71	TCGA-DK-AA71-01A-31D-A391-08	TCGA-DK-AA71-10A-01D-A394-08
BLCA	TCGA-DK-AA74	TCGA-DK-AA74-01A-11D-A391-08	TCGA-DK-AA74-10A-01D-A394-08
BLCA	TCGA-DK-AA75	TCGA-DK-AA75-01A-11D-A391-08	TCGA-DK-AA75-10A-01D-A394-08
BLCA	TCGA-DK-AA76	TCGA-DK-AA76-01A-11D-A391-08	TCGA-DK-AA76-10A-01D-A394-08
BLCA	TCGA-DK-AA77	TCGA-DK-AA77-01A-11D-A391-08	TCGA-DK-AA77-10A-01D-A394-08
BLCA	TCGA-E5-A2PC	TCGA-E5-A2PC-01A-11D-A202-08	TCGA-E5-A2PC-10B-01D-A202-08
BLCA	TCGA-E5-A4TZ	TCGA-E5-A4TZ-01A-11D-A31L-08	TCGA-E5-A4TZ-10B-01D-A31J-08
BLCA	TCGA-E5-A4U1	TCGA-E5-A4U1-01A-11D-A31L-08	TCGA-E5-A4U1-10B-01D-A31J-08
BLCA	TCGA-E7-A3X6	TCGA-E7-A3X6-01A-12D-A22Z-08	TCGA-E7-A3X6-10A-01D-A22Z-08
BLCA	TCGA-E7-A3Y1	TCGA-E7-A3Y1-01A-11D-A22Z-08	TCGA-E7-A3Y1-10A-01D-A22Z-08
BLCA	TCGA-E7-A4IJ	TCGA-E7-A4IJ-01A-31D-A26M-08	TCGA-E7-A4IJ-10A-01D-A26K-08
BLCA	TCGA-E7-A4XJ	TCGA-E7-A4XJ-01A-11D-A26M-08	TCGA-E7-A4XJ-10A-01D-A26K-08
BLCA	TCGA-E7-A519	TCGA-E7-A519-01A-11D-A26M-08	TCGA-E7-A519-10A-01D-A26K-08
BLCA	TCGA-E7-A541	TCGA-E7-A541-01A-11D-A26M-08	TCGA-E7-A541-10A-01D-A26K-08
BLCA	TCGA-E7-A5KE	TCGA-E7-A5KE-01A-11D-A289-08	TCGA-E7-A5KE-10A-01D-A289-08
BLCA	TCGA-E7-A5KF	TCGA-E7-A5KF-01A-11D-A289-08	TCGA-E7-A5KF-10A-01D-A289-08
BLCA	TCGA-E7-A677	TCGA-E7-A677-01A-11D-A30E-08	TCGA-E7-A677-10A-01D-A30H-08
BLCA	TCGA-E7-A678	TCGA-E7-A678-01A-11D-A30E-08	TCGA-E7-A678-10A-01D-A30H-08
BLCA	TCGA-E7-A6MD	TCGA-E7-A6MD-01A-41D-A34U-08	TCGA-E7-A6MD-10B-01D-A34X-08
BLCA	TCGA-E7-A6ME	TCGA-E7-A6ME-01A-22D-A32B-08	TCGA-E7-A6ME-10B-01D-A329-08
BLCA	TCGA-E7-A6MF	TCGA-E7-A6MF-01A-12D-A32B-08	TCGA-E7-A6MF-10B-01D-A329-08
BLCA	TCGA-E7-A7DU	TCGA-E7-A7DU-01A-11D-A32B-08	TCGA-E7-A7DU-10A-01D-A329-08
BLCA	TCGA-E7-A7DV	TCGA-E7-A7DV-01A-11D-A339-08	TCGA-E7-A7DV-10A-01D-A339-08
BLCA	TCGA-E7-A7PW	TCGA-E7-A7PW-01A-11D-A34U-08	TCGA-E7-A7PW-10A-01D-A34X-08
BLCA	TCGA-E7-A7XN	TCGA-E7-A7XN-01A-11D-A34U-08	TCGA-E7-A7XN-10A-01D-A34X-08
BLCA	TCGA-E7-A85H	TCGA-E7-A85H-01A-11D-A34U-08	TCGA-E7-A85H-10B-01D-A34X-08
BLCA	TCGA-E7-A8O7	TCGA-E7-A8O7-01A-11D-A364-08	TCGA-E7-A8O7-10A-01D-A362-08
BLCA	TCGA-E7-A8O8	TCGA-E7-A8O8-01A-11D-A364-08	TCGA-E7-A8O8-10A-01D-A362-08
BLCA	TCGA-E7-A97P	TCGA-E7-A97P-01A-11D-A38G-08	TCGA-E7-A97P-10A-01D-A38J-08
BLCA	TCGA-E7-A97Q	TCGA-E7-A97Q-01A-11D-A38G-08	TCGA-E7-A97Q-10A-01D-A38J-08
BLCA	TCGA-FD-A3B3	TCGA-FD-A3B3-01A-12D-A202-08	TCGA-FD-A3B3-10A-01D-A202-08
BLCA	TCGA-FD-A3B4	TCGA-FD-A3B4-01A-12D-A202-08	TCGA-FD-A3B4-10A-01D-A202-08
BLCA	TCGA-FD-A3B5	TCGA-FD-A3B5-01A-11D-A20D-08	TCGA-FD-A3B5-10A-01D-A20D-08
BLCA	TCGA-FD-A3B6	TCGA-FD-A3B6-01A-21D-A20D-08	TCGA-FD-A3B6-10A-01D-A20D-08
BLCA	TCGA-FD-A3B7	TCGA-FD-A3B7-01A-31D-A20D-08	TCGA-FD-A3B7-10A-01D-A20D-08
BLCA	TCGA-FD-A3B8	TCGA-FD-A3B8-01A-31D-A20D-08	TCGA-FD-A3B8-10A-01D-A20D-08
BLCA	TCGA-FD-A3N5	TCGA-FD-A3N5-01A-11D-A21A-08	TCGA-FD-A3N5-10A-01D-A21A-08
BLCA	TCGA-FD-A3N6	TCGA-FD-A3N6-01A-11D-A21A-08	TCGA-FD-A3N6-10A-01D-A21A-08
BLCA	TCGA-FD-A3NA	TCGA-FD-A3NA-01A-11D-A21A-08	TCGA-FD-A3NA-10A-01D-A21A-08
BLCA	TCGA-FD-A3SJ	TCGA-FD-A3SJ-01A-12D-A22Z-08	TCGA-FD-A3SJ-10A-01D-A22Z-08
BLCA	TCGA-FD-A3SL	TCGA-FD-A3SL-01A-21D-A22Z-08	TCGA-FD-A3SL-10A-01D-A22Z-08
BLCA	TCGA-FD-A3SM	TCGA-FD-A3SM-01A-11D-A22Z-08	TCGA-FD-A3SM-10A-01D-A22Z-08
BLCA	TCGA-FD-A3SN	TCGA-FD-A3SN-01A-12D-A22Z-08	TCGA-FD-A3SN-10A-01D-A22Z-08
BLCA	TCGA-FD-A3SO	TCGA-FD-A3SO-01A-11D-A22Z-08	TCGA-FD-A3SO-10A-01D-A22Z-08
BLCA	TCGA-FD-A3SP	TCGA-FD-A3SP-01A-31D-A22Z-08	TCGA-FD-A3SP-10A-01D-A22Z-08
BLCA	TCGA-FD-A3SQ	TCGA-FD-A3SQ-01A-21D-A22Z-08	TCGA-FD-A3SQ-10A-01D-A22Z-08
BLCA	TCGA-FD-A3SR	TCGA-FD-A3SR-01A-11D-A22Z-08	TCGA-FD-A3SR-10A-01D-A22Z-08
BLCA	TCGA-FD-A3SS	TCGA-FD-A3SS-01A-12D-A22Z-08	TCGA-FD-A3SS-10A-01D-A22Z-08
BLCA	TCGA-FD-A43N	TCGA-FD-A43N-01A-11D-A23U-08	TCGA-FD-A43N-10A-01D-A23U-08
BLCA	TCGA-FD-A43P	TCGA-FD-A43P-01A-31D-A23U-08	TCGA-FD-A43P-10A-01D-A23U-08
BLCA	TCGA-FD-A43U	TCGA-FD-A43U-01A-11D-A23U-08	TCGA-FD-A43U-10A-01D-A23U-08
BLCA	TCGA-FD-A43X	TCGA-FD-A43X-01A-11D-A23U-08	TCGA-FD-A43X-10A-01D-A23U-08
BLCA	TCGA-FD-A43Y	TCGA-FD-A43Y-01A-21D-A26M-08	TCGA-FD-A43Y-10A-01D-A26K-08
BLCA	TCGA-FD-A5BR	TCGA-FD-A5BR-01A-11D-A26M-08	TCGA-FD-A5BR-10A-01D-A26K-08
BLCA	TCGA-FD-A5BS	TCGA-FD-A5BS-01A-21D-A26M-08	TCGA-FD-A5BS-10A-01D-A26K-08
BLCA	TCGA-FD-A5BT	TCGA-FD-A5BT-01A-11D-A26M-08	TCGA-FD-A5BT-10A-01D-A26K-08
BLCA	TCGA-FD-A5BU	TCGA-FD-A5BU-01A-31D-A26M-08	TCGA-FD-A5BU-10A-01D-A26K-08
BLCA	TCGA-FD-A5BV	TCGA-FD-A5BV-01A-11D-A26M-08	TCGA-FD-A5BV-10A-01D-A26K-08
BLCA	TCGA-FD-A5BX	TCGA-FD-A5BX-01A-11D-A26M-08	TCGA-FD-A5BX-10A-01D-A26K-08
BLCA	TCGA-FD-A5BY	TCGA-FD-A5BY-01A-31D-A289-08	TCGA-FD-A5BY-10A-01D-A289-08
BLCA	TCGA-FD-A5BZ	TCGA-FD-A5BZ-01A-11D-A289-08	TCGA-FD-A5BZ-10A-01D-A289-08
BLCA	TCGA-FD-A5C0	TCGA-FD-A5C0-01A-11D-A289-08	TCGA-FD-A5C0-10A-01D-A289-08
BLCA	TCGA-FD-A5C1	TCGA-FD-A5C1-01A-11D-A289-08	TCGA-FD-A5C1-10A-01D-A289-08
BLCA	TCGA-FD-A62N	TCGA-FD-A62N-01A-11D-A30E-08	TCGA-FD-A62N-10A-01D-A30H-08
BLCA	TCGA-FD-A62O	TCGA-FD-A62O-01A-11D-A30E-08	TCGA-FD-A62O-10A-01D-A30H-08
BLCA	TCGA-FD-A62P	TCGA-FD-A62P-01A-32D-A30E-08	TCGA-FD-A62P-10A-01D-A30H-08
BLCA	TCGA-FD-A62S	TCGA-FD-A62S-01A-11D-A30E-08	TCGA-FD-A62S-10A-01D-A30H-08
BLCA	TCGA-FD-A6TA	TCGA-FD-A6TA-01A-12D-A339-08	TCGA-FD-A6TA-10A-21D-A339-08
BLCA	TCGA-FD-A6TB	TCGA-FD-A6TB-01A-12D-A339-08	TCGA-FD-A6TB-10A-21D-A339-08
BLCA	TCGA-FD-A6TC	TCGA-FD-A6TC-01A-21D-A339-08	TCGA-FD-A6TC-10A-21D-A339-08
BLCA	TCGA-FD-A6TD	TCGA-FD-A6TD-01A-51D-A339-08	TCGA-FD-A6TD-10A-21D-A339-08
BLCA	TCGA-FD-A6TE	TCGA-FD-A6TE-01A-12D-A339-08	TCGA-FD-A6TE-10A-21D-A339-08
BLCA	TCGA-FD-A6TF	TCGA-FD-A6TF-01A-52D-A32B-08	TCGA-FD-A6TF-10A-21D-A329-08
BLCA	TCGA-FD-A6TG	TCGA-FD-A6TG-01A-11D-A32B-08	TCGA-FD-A6TG-10A-01D-A329-08
BLCA	TCGA-FD-A6TH	TCGA-FD-A6TH-01A-11D-A32B-08	TCGA-FD-A6TH-10A-01D-A329-08
BLCA	TCGA-FD-A6TI	TCGA-FD-A6TI-01A-11D-A32B-08	TCGA-FD-A6TI-10A-01D-A329-08
BLCA	TCGA-FD-A6TK	TCGA-FD-A6TK-01A-42D-A339-08	TCGA-FD-A6TK-10A-21D-A339-08
BLCA	TCGA-FJ-A3Z7	TCGA-FJ-A3Z7-01A-12D-A23M-08	TCGA-FJ-A3Z7-10A-01D-A23K-08
BLCA	TCGA-FJ-A3Z9	TCGA-FJ-A3Z9-01A-11D-A26M-08	TCGA-FJ-A3Z9-10A-01D-A26K-08
BLCA	TCGA-FJ-A3ZE	TCGA-FJ-A3ZE-01A-11D-A23M-08	TCGA-FJ-A3ZE-10A-01D-A23K-08
BLCA	TCGA-FJ-A3ZF	TCGA-FJ-A3ZF-01A-11D-A23M-08	TCGA-FJ-A3ZF-10A-01D-A23K-08
BLCA	TCGA-FJ-A871	TCGA-FJ-A871-01A-11D-A34U-08	TCGA-FJ-A871-10A-01D-A34X-08
BLCA	TCGA-FT-A3EE	TCGA-FT-A3EE-01A-11D-A202-08	TCGA-FT-A3EE-10A-01D-A202-08
BLCA	TCGA-FT-A61P	TCGA-FT-A61P-01A-11D-A30E-08	TCGA-FT-A61P-10A-01D-A30H-08
BLCA	TCGA-G2-A2EC	TCGA-G2-A2EC-01A-11D-A17V-08	TCGA-G2-A2EC-10A-01D-A17V-08
BLCA	TCGA-G2-A2EF	TCGA-G2-A2EF-01A-12D-A18F-08	TCGA-G2-A2EF-10A-01D-A18F-08
BLCA	TCGA-G2-A2EJ	TCGA-G2-A2EJ-01A-11D-A17V-08	TCGA-G2-A2EJ-10A-01D-A17V-08
BLCA	TCGA-G2-A2EK	TCGA-G2-A2EK-01A-22D-A18F-08	TCGA-G2-A2EK-10A-01D-A18F-08
BLCA	TCGA-G2-A2EL	TCGA-G2-A2EL-01A-12D-A18F-08	TCGA-G2-A2EL-10A-01D-A18F-08
BLCA	TCGA-G2-A2EO	TCGA-G2-A2EO-01A-11D-A17V-08	TCGA-G2-A2EO-11A-21D-A17V-08
BLCA	TCGA-G2-A2ES	TCGA-G2-A2ES-01A-11D-A17V-08	TCGA-G2-A2ES-11A-31D-A17V-08
BLCA	TCGA-G2-A3IB	TCGA-G2-A3IB-01A-11D-A20D-08	TCGA-G2-A3IB-10A-01D-A20D-08
BLCA	TCGA-G2-A3IE	TCGA-G2-A3IE-01A-11D-A20D-08	TCGA-G2-A3IE-10A-01D-A20D-08
BLCA	TCGA-G2-A3VY	TCGA-G2-A3VY-01A-11D-A22Z-08	TCGA-G2-A3VY-10A-01D-A22Z-08
BLCA	TCGA-G2-AA3B	TCGA-G2-AA3B-01A-11D-A391-08	TCGA-G2-AA3B-10A-01D-A394-08
BLCA	TCGA-G2-AA3C	TCGA-G2-AA3C-01A-21D-A391-08	TCGA-G2-AA3C-10A-01D-A394-08
BLCA	TCGA-G2-AA3D	TCGA-G2-AA3D-01A-11D-A391-08	TCGA-G2-AA3D-10A-01D-A394-08
BLCA	TCGA-G2-AA3F	TCGA-G2-AA3F-01A-12D-A42E-08	TCGA-G2-AA3F-10A-01D-A42H-08
BLCA	TCGA-GC-A3BM	TCGA-GC-A3BM-01A-11D-A22Z-08	TCGA-GC-A3BM-10A-01D-A22Z-08
BLCA	TCGA-GC-A3I6	TCGA-GC-A3I6-01A-11D-A20D-08	TCGA-GC-A3I6-10A-01D-A20D-08
BLCA	TCGA-GC-A3OO	TCGA-GC-A3OO-01A-11D-A22Z-08	TCGA-GC-A3OO-10C-01D-A22Z-08
BLCA	TCGA-GC-A3RB	TCGA-GC-A3RB-01A-12D-A21Z-08	TCGA-GC-A3RB-10A-01D-A21Z-08
BLCA	TCGA-GC-A3RC	TCGA-GC-A3RC-01A-11D-A22Z-08	TCGA-GC-A3RC-10B-01D-A22Z-08
BLCA	TCGA-GC-A3RD	TCGA-GC-A3RD-01A-12D-A22Z-08	TCGA-GC-A3RD-10B-01D-A22Z-08
BLCA	TCGA-GC-A3WC	TCGA-GC-A3WC-01A-31D-A22Z-08	TCGA-GC-A3WC-10A-01D-A22Z-08
BLCA	TCGA-GC-A3YS	TCGA-GC-A3YS-01A-11D-A23M-08	TCGA-GC-A3YS-10A-01D-A23K-08
BLCA	TCGA-GC-A4ZW	TCGA-GC-A4ZW-01A-11D-A26M-08	TCGA-GC-A4ZW-10A-01D-A26K-08
BLCA	TCGA-GC-A6I1	TCGA-GC-A6I1-01A-12D-A31L-08	TCGA-GC-A6I1-10A-01D-A31J-08
BLCA	TCGA-GC-A6I3	TCGA-GC-A6I3-01A-11D-A31L-08	TCGA-GC-A6I3-10A-01D-A31J-08
BLCA	TCGA-GD-A2C5	TCGA-GD-A2C5-01A-12D-A17V-08	TCGA-GD-A2C5-10A-01D-A17V-08
BLCA	TCGA-GD-A3OP	TCGA-GD-A3OP-01A-21D-A21Z-08	TCGA-GD-A3OP-10A-01D-A21Z-08
BLCA	TCGA-GD-A3OQ	TCGA-GD-A3OQ-01A-32D-A21Z-08	TCGA-GD-A3OQ-10A-01D-A21Z-08
BLCA	TCGA-GD-A3OS	TCGA-GD-A3OS-01A-12D-A21Z-08	TCGA-GD-A3OS-10A-01D-A21Z-08
BLCA	TCGA-GD-A6C6	TCGA-GD-A6C6-01A-21D-A31L-08	TCGA-GD-A6C6-10A-01D-A31J-08
BLCA	TCGA-GD-A76B	TCGA-GD-A76B-01A-11D-A32B-08	TCGA-GD-A76B-10A-01D-A329-08
BLCA	TCGA-GU-A42P	TCGA-GU-A42P-01A-11D-A23U-08	TCGA-GU-A42P-10A-01D-A23U-08
BLCA	TCGA-GU-A42Q	TCGA-GU-A42Q-01A-11D-A23U-08	TCGA-GU-A42Q-10A-01D-A23U-08
BLCA	TCGA-GU-A42R	TCGA-GU-A42R-01A-11D-A23M-08	TCGA-GU-A42R-10A-01D-A23K-08
BLCA	TCGA-GU-A762	TCGA-GU-A762-01A-11D-A339-08	TCGA-GU-A762-10A-01D-A339-08
BLCA	TCGA-GU-A763	TCGA-GU-A763-01A-11D-A32B-08	TCGA-GU-A763-10A-01D-A329-08
BLCA	TCGA-GU-A764	TCGA-GU-A764-01A-11D-A34U-08	TCGA-GU-A764-10B-01D-A34X-08
BLCA	TCGA-GU-A766	TCGA-GU-A766-01A-11D-A32B-08	TCGA-GU-A766-10A-01D-A329-08
BLCA	TCGA-GU-A767	TCGA-GU-A767-01A-11D-A32B-08	TCGA-GU-A767-10A-01D-A329-08
BLCA	TCGA-GU-AATO	TCGA-GU-AATO-01A-11D-A391-08	TCGA-GU-AATO-10A-01D-A394-08
BLCA	TCGA-GU-AATP	TCGA-GU-AATP-01A-11D-A391-08	TCGA-GU-AATP-10A-01D-A394-08
BLCA	TCGA-GU-AATQ	TCGA-GU-AATQ-01A-11D-A391-08	TCGA-GU-AATQ-10A-01D-A394-08
BLCA	TCGA-GV-A3JV	TCGA-GV-A3JV-01A-11D-A21Z-08	TCGA-GV-A3JV-10B-01D-A21Z-08
BLCA	TCGA-GV-A3JW	TCGA-GV-A3JW-01A-11D-A20D-08	TCGA-GV-A3JW-10A-01D-A20D-08
BLCA	TCGA-GV-A3JX	TCGA-GV-A3JX-01A-11D-A20D-08	TCGA-GV-A3JX-10A-01D-A20D-08
BLCA	TCGA-GV-A3JZ	TCGA-GV-A3JZ-01A-11D-A21A-08	TCGA-GV-A3JZ-10A-01D-A21A-08
BLCA	TCGA-GV-A3QF	TCGA-GV-A3QF-01A-31D-A22Z-08	TCGA-GV-A3QF-10A-01D-A22Z-08
BLCA	TCGA-GV-A3QG	TCGA-GV-A3QG-01A-11D-A21Z-08	TCGA-GV-A3QG-10A-01D-A21Z-08
BLCA	TCGA-GV-A3QH	TCGA-GV-A3QH-01A-11D-A21Z-08	TCGA-GV-A3QH-10A-01D-A21Z-08
BLCA	TCGA-GV-A3QI	TCGA-GV-A3QI-01A-11D-A21Z-08	TCGA-GV-A3QI-10A-01D-A21Z-08
BLCA	TCGA-GV-A3QK	TCGA-GV-A3QK-01B-11D-A23M-08	TCGA-GV-A3QK-10A-01D-A23K-08
BLCA	TCGA-GV-A40E	TCGA-GV-A40E-01A-12D-A23M-08	TCGA-GV-A40E-10A-01D-A23K-08
BLCA	TCGA-GV-A40G	TCGA-GV-A40G-01A-11D-A23M-08	TCGA-GV-A40G-10A-01D-A23K-08
BLCA	TCGA-GV-A6ZA	TCGA-GV-A6ZA-01A-12D-A339-08	TCGA-GV-A6ZA-10A-01D-A339-08
BLCA	TCGA-H4-A2HO	TCGA-H4-A2HO-01A-11D-A17V-08	TCGA-H4-A2HO-10A-01D-A17V-08
BLCA	TCGA-H4-A2HQ	TCGA-H4-A2HQ-01A-11D-A17V-08	TCGA-H4-A2HQ-10A-01D-A17V-08
BLCA	TCGA-HQ-A2OE	TCGA-HQ-A2OE-01A-11D-A202-08	TCGA-HQ-A2OE-10A-01D-A202-08
BLCA	TCGA-HQ-A2OF	TCGA-HQ-A2OF-01A-11D-A26M-08	TCGA-HQ-A2OF-10B-01D-A26K-08
BLCA	TCGA-HQ-A5ND	TCGA-HQ-A5ND-01A-11D-A26M-08	TCGA-HQ-A5ND-10A-01D-A26K-08
BLCA	TCGA-HQ-A5NE	TCGA-HQ-A5NE-01A-12D-A289-08	TCGA-HQ-A5NE-10A-01D-A289-08
BLCA	TCGA-K4-A3WS	TCGA-K4-A3WS-01A-11D-A22Z-08	TCGA-K4-A3WS-10A-01D-A22Z-08
BLCA	TCGA-K4-A3WU	TCGA-K4-A3WU-01B-11D-A23M-08	TCGA-K4-A3WU-10A-01D-A23K-08
BLCA	TCGA-K4-A3WV	TCGA-K4-A3WV-01A-11D-A22Z-08	TCGA-K4-A3WV-10A-01D-A22Z-08
BLCA	TCGA-K4-A4AB	TCGA-K4-A4AB-01B-12D-A289-08	TCGA-K4-A4AB-10A-01D-A289-08
BLCA	TCGA-K4-A4AC	TCGA-K4-A4AC-01A-21D-A26M-08	TCGA-K4-A4AC-10A-01D-A26K-08
BLCA	TCGA-K4-A54R	TCGA-K4-A54R-01A-11D-A26M-08	TCGA-K4-A54R-10A-01D-A26K-08
BLCA	TCGA-K4-A5RH	TCGA-K4-A5RH-01A-11D-A30E-08	TCGA-K4-A5RH-10A-01D-A30H-08
BLCA	TCGA-K4-A5RI	TCGA-K4-A5RI-01A-11D-A289-08	TCGA-K4-A5RI-10A-01D-A289-08
BLCA	TCGA-K4-A5RJ	TCGA-K4-A5RJ-01A-11D-A289-08	TCGA-K4-A5RJ-10A-01D-A289-08
BLCA	TCGA-K4-A6FZ	TCGA-K4-A6FZ-01A-11D-A31L-08	TCGA-K4-A6FZ-10A-01D-A31J-08
BLCA	TCGA-K4-A6MB	TCGA-K4-A6MB-01A-11D-A31L-08	TCGA-K4-A6MB-10A-01D-A31J-08
BLCA	TCGA-K4-A83P	TCGA-K4-A83P-01A-11D-A34U-08	TCGA-K4-A83P-10A-01D-A34X-08
BLCA	TCGA-K4-AAQO	TCGA-K4-AAQO-01A-11D-A38G-08	TCGA-K4-AAQO-10A-01D-A38J-08
BLCA	TCGA-KQ-A41N	TCGA-KQ-A41N-01A-11D-A339-08	TCGA-KQ-A41N-10D-01D-A339-08
BLCA	TCGA-KQ-A41O	TCGA-KQ-A41O-01A-12D-A34U-08	TCGA-KQ-A41O-10D-01D-A34X-08
BLCA	TCGA-KQ-A41P	TCGA-KQ-A41P-01A-12D-A339-08	TCGA-KQ-A41P-10F-01D-A339-08
BLCA	TCGA-KQ-A41Q	TCGA-KQ-A41Q-01A-11D-A339-08	TCGA-KQ-A41Q-10D-01D-A339-08
BLCA	TCGA-KQ-A41R	TCGA-KQ-A41R-01A-21D-A34U-08	TCGA-KQ-A41R-10G-01D-A34X-08
BLCA	TCGA-KQ-A41S	TCGA-KQ-A41S-01A-12D-A339-08	TCGA-KQ-A41S-10C-01D-A339-08
BLCA	TCGA-LC-A66R	TCGA-LC-A66R-01A-41D-A30E-08	TCGA-LC-A66R-10A-01D-A30H-08
BLCA	TCGA-LT-A5Z6	TCGA-LT-A5Z6-01A-11D-A289-08	TCGA-LT-A5Z6-10A-01D-A289-08
BLCA	TCGA-LT-A8JT	TCGA-LT-A8JT-01A-11D-A364-08	TCGA-LT-A8JT-10A-01D-A362-08
BLCA	TCGA-MV-A51V	TCGA-MV-A51V-01A-11D-A26M-08	TCGA-MV-A51V-10A-01D-A26K-08
BLCA	TCGA-PQ-A6FI	TCGA-PQ-A6FI-01A-11D-A31L-08	TCGA-PQ-A6FI-10A-01D-A31J-08
BLCA	TCGA-PQ-A6FN	TCGA-PQ-A6FN-01A-11D-A31L-08	TCGA-PQ-A6FN-10A-01D-A31J-08
BLCA	TCGA-R3-A69X	TCGA-R3-A69X-01A-22D-A30E-08	TCGA-R3-A69X-10A-01D-A30H-08
BLCA	TCGA-S5-A6DX	TCGA-S5-A6DX-01A-11D-A31L-08	TCGA-S5-A6DX-10A-01D-A31J-08
BLCA	TCGA-S5-AA26	TCGA-S5-AA26-01A-11D-A38G-08	TCGA-S5-AA26-10A-01D-A38J-08
BLCA	TCGA-SY-A9G0	TCGA-SY-A9G0-01A-12D-A38G-08	TCGA-SY-A9G0-10A-01D-A38J-08
BLCA	TCGA-SY-A9G5	TCGA-SY-A9G5-01A-11D-A38G-08	TCGA-SY-A9G5-10A-01D-A38J-08
BLCA	TCGA-UY-A78K	TCGA-UY-A78K-01A-11D-A339-08	TCGA-UY-A78K-10A-01D-A339-08
BLCA	TCGA-UY-A78L	TCGA-UY-A78L-01A-12D-A339-08	TCGA-UY-A78L-10A-01D-A339-08
BLCA	TCGA-UY-A78M	TCGA-UY-A78M-01A-21D-A34U-08	TCGA-UY-A78M-10A-01D-A34X-08
BLCA	TCGA-UY-A78N	TCGA-UY-A78N-01A-12D-A339-08	TCGA-UY-A78N-10A-01D-A339-08
BLCA	TCGA-UY-A78O	TCGA-UY-A78O-01A-12D-A339-08	TCGA-UY-A78O-10A-01D-A339-08
BLCA	TCGA-UY-A78P	TCGA-UY-A78P-01A-12D-A364-08	TCGA-UY-A78P-11A-11D-A362-08
BLCA	TCGA-UY-A8OB	TCGA-UY-A8OB-01A-12D-A42E-08	TCGA-UY-A8OB-11A-12D-A42H-08
BLCA	TCGA-UY-A8OC	TCGA-UY-A8OC-01A-11D-A364-08	TCGA-UY-A8OC-10A-01D-A362-08
BLCA	TCGA-UY-A8OD	TCGA-UY-A8OD-01A-11D-A364-08	TCGA-UY-A8OD-10A-01D-A362-08
BLCA	TCGA-UY-A9PA	TCGA-UY-A9PA-01A-11D-A38G-08	TCGA-UY-A9PA-10A-01D-A38J-08
BLCA	TCGA-UY-A9PB	TCGA-UY-A9PB-01A-11D-A38G-08	TCGA-UY-A9PB-10A-01D-A38J-08
BLCA	TCGA-UY-A9PD	TCGA-UY-A9PD-01A-11D-A38G-08	TCGA-UY-A9PD-10A-01D-A38J-08
BLCA	TCGA-UY-A9PE	TCGA-UY-A9PE-01A-11D-A38G-08	TCGA-UY-A9PE-10A-01D-A38J-08
BLCA	TCGA-UY-A9PF	TCGA-UY-A9PF-01A-11D-A38G-08	TCGA-UY-A9PF-10A-01D-A38J-08
BLCA	TCGA-UY-A9PH	TCGA-UY-A9PH-01A-11D-A38G-08	TCGA-UY-A9PH-10A-01D-A38J-08
BLCA	TCGA-XF-A8HB	TCGA-XF-A8HB-01A-11D-A364-08	TCGA-XF-A8HB-10A-01D-A362-08
BLCA	TCGA-XF-A8HC	TCGA-XF-A8HC-01A-11D-A364-08	TCGA-XF-A8HC-10A-01D-A362-08
BLCA	TCGA-XF-A8HD	TCGA-XF-A8HD-01A-11D-A364-08	TCGA-XF-A8HD-10A-01D-A362-08
BLCA	TCGA-XF-A8HE	TCGA-XF-A8HE-01A-11D-A364-08	TCGA-XF-A8HE-10A-01D-A362-08
BLCA	TCGA-XF-A8HF	TCGA-XF-A8HF-01A-11D-A364-08	TCGA-XF-A8HF-10A-01D-A362-08
BLCA	TCGA-XF-A8HG	TCGA-XF-A8HG-01A-11D-A364-08	TCGA-XF-A8HG-10A-01D-A362-08
BLCA	TCGA-XF-A8HH	TCGA-XF-A8HH-01A-11D-A38G-08	TCGA-XF-A8HH-10A-01D-A38J-08
BLCA	TCGA-XF-A8HI	TCGA-XF-A8HI-01A-11D-A38G-08	TCGA-XF-A8HI-10A-01D-A38J-08
BLCA	TCGA-XF-A9SG	TCGA-XF-A9SG-01A-12D-A42E-08	TCGA-XF-A9SG-10A-01D-A42H-08
BLCA	TCGA-XF-A9SH	TCGA-XF-A9SH-01A-11D-A391-08	TCGA-XF-A9SH-10A-01D-A394-08
BLCA	TCGA-XF-A9SI	TCGA-XF-A9SI-01A-11D-A391-08	TCGA-XF-A9SI-10A-01D-A394-08
BLCA	TCGA-XF-A9SJ	TCGA-XF-A9SJ-01A-11D-A391-08	TCGA-XF-A9SJ-10A-01D-A394-08
BLCA	TCGA-XF-A9SK	TCGA-XF-A9SK-01A-11D-A42E-08	TCGA-XF-A9SK-10A-01D-A42H-08
BLCA	TCGA-XF-A9SL	TCGA-XF-A9SL-01A-11D-A391-08	TCGA-XF-A9SL-10A-01D-A394-08
BLCA	TCGA-XF-A9SM	TCGA-XF-A9SM-01A-11D-A42E-08	TCGA-XF-A9SM-10A-01D-A42H-08
BLCA	TCGA-XF-A9SP	TCGA-XF-A9SP-01A-11D-A391-08	TCGA-XF-A9SP-10A-01D-A394-08
BLCA	TCGA-XF-A9ST	TCGA-XF-A9ST-01A-11D-A42E-08	TCGA-XF-A9ST-10A-01D-A42H-08
BLCA	TCGA-XF-A9SU	TCGA-XF-A9SU-01A-31D-A391-08	TCGA-XF-A9SU-10A-01D-A394-08
BLCA	TCGA-XF-A9SV	TCGA-XF-A9SV-01A-21D-A42E-08	TCGA-XF-A9SV-10A-01D-A42H-08
BLCA	TCGA-XF-A9SW	TCGA-XF-A9SW-01A-11D-A42E-08	TCGA-XF-A9SW-10A-01D-A42H-08
BLCA	TCGA-XF-A9SX	TCGA-XF-A9SX-01A-21D-A391-08	TCGA-XF-A9SX-10A-01D-A394-08
BLCA	TCGA-XF-A9SY	TCGA-XF-A9SY-01A-21D-A42E-08	TCGA-XF-A9SY-10A-01D-A42H-08
BLCA	TCGA-XF-A9SZ	TCGA-XF-A9SZ-01A-11D-A391-08	TCGA-XF-A9SZ-10A-01D-A394-08
BLCA	TCGA-XF-A9T0	TCGA-XF-A9T0-01A-11D-A391-08	TCGA-XF-A9T0-10A-01D-A394-08
BLCA	TCGA-XF-A9T2	TCGA-XF-A9T2-01A-11D-A42E-08	TCGA-XF-A9T2-10A-01D-A42H-08
BLCA	TCGA-XF-A9T3	TCGA-XF-A9T3-01A-11D-A42E-08	TCGA-XF-A9T3-10A-01D-A42H-08
BLCA	TCGA-XF-A9T4	TCGA-XF-A9T4-01A-11D-A391-08	TCGA-XF-A9T4-10A-01D-A394-08
BLCA	TCGA-XF-A9T5	TCGA-XF-A9T5-01A-11D-A42E-08	TCGA-XF-A9T5-10A-01D-A42H-08
BLCA	TCGA-XF-A9T6	TCGA-XF-A9T6-01A-11D-A42E-08	TCGA-XF-A9T6-10A-01D-A42H-08
BLCA	TCGA-XF-A9T8	TCGA-XF-A9T8-01A-11D-A391-08	TCGA-XF-A9T8-10A-01D-A394-08
BLCA	TCGA-XF-AAME	TCGA-XF-AAME-01A-12D-A42E-08	TCGA-XF-AAME-10A-01D-A42H-08
BLCA	TCGA-XF-AAMF	TCGA-XF-AAMF-01A-21D-A42E-08	TCGA-XF-AAMF-10A-01D-A42H-08
BLCA	TCGA-XF-AAMG	TCGA-XF-AAMG-01A-11D-A42E-08	TCGA-XF-AAMG-10A-01D-A42H-08
BLCA	TCGA-XF-AAMH	TCGA-XF-AAMH-01A-11D-A42E-08	TCGA-XF-AAMH-10A-01D-A42H-08
BLCA	TCGA-XF-AAMJ	TCGA-XF-AAMJ-01A-11D-A42E-08	TCGA-XF-AAMJ-10A-01D-A42H-08
BLCA	TCGA-XF-AAML	TCGA-XF-AAML-01A-11D-A42E-08	TCGA-XF-AAML-10A-01D-A42H-08
BLCA	TCGA-XF-AAMQ	TCGA-XF-AAMQ-01A-11D-A42E-08	TCGA-XF-AAMQ-10A-01D-A42H-08
BLCA	TCGA-XF-AAMR	TCGA-XF-AAMR-01A-31D-A42E-08	TCGA-XF-AAMR-10A-01D-A42H-08
BLCA	TCGA-XF-AAMT	TCGA-XF-AAMT-01A-11D-A42E-08	TCGA-XF-AAMT-10A-01D-A42H-08
BLCA	TCGA-XF-AAMW	TCGA-XF-AAMW-01A-11D-A42E-08	TCGA-XF-AAMW-10A-01D-A42H-08
BLCA	TCGA-XF-AAMX	TCGA-XF-AAMX-01A-11D-A42E-08	TCGA-XF-AAMX-10A-01D-A42H-08
BLCA	TCGA-XF-AAMY	TCGA-XF-AAMY-01A-11D-A42E-08	TCGA-XF-AAMY-10A-01D-A42H-08
BLCA	TCGA-XF-AAMZ	TCGA-XF-AAMZ-01A-11D-A42E-08	TCGA-XF-AAMZ-10A-01D-A42H-08
BLCA	TCGA-XF-AAN0	TCGA-XF-AAN0-01A-11D-A42E-08	TCGA-XF-AAN0-10A-01D-A42H-08
BLCA	TCGA-XF-AAN1	TCGA-XF-AAN1-01A-31D-A42E-08	TCGA-XF-AAN1-10A-01D-A42H-08
BLCA	TCGA-XF-AAN2	TCGA-XF-AAN2-01A-11D-A42E-08	TCGA-XF-AAN2-10A-01D-A42H-08
BLCA	TCGA-XF-AAN3	TCGA-XF-AAN3-01A-11D-A42E-08	TCGA-XF-AAN3-10A-01D-A42H-08
BLCA	TCGA-XF-AAN4	TCGA-XF-AAN4-01A-11D-A42E-08	TCGA-XF-AAN4-10A-01D-A42H-08
BLCA	TCGA-XF-AAN5	TCGA-XF-AAN5-01A-11D-A42E-08	TCGA-XF-AAN5-10A-01D-A42H-08
BLCA	TCGA-XF-AAN7	TCGA-XF-AAN7-01A-11D-A42E-08	TCGA-XF-AAN7-10A-01D-A42H-08
BLCA	TCGA-XF-AAN8	TCGA-XF-AAN8-01A-11D-A42E-08	TCGA-XF-AAN8-10A-01D-A42H-08
BLCA	TCGA-YC-A89H	TCGA-YC-A89H-01A-11D-A364-08	TCGA-YC-A89H-10A-01D-A362-08
BLCA	TCGA-YC-A8S6	TCGA-YC-A8S6-01A-31D-A38G-08	TCGA-YC-A8S6-10A-01D-A38J-08
BLCA	TCGA-YC-A9TC	TCGA-YC-A9TC-01A-22D-A391-08	TCGA-YC-A9TC-10A-01D-A394-08
BLCA	TCGA-YF-AA3L	TCGA-YF-AA3L-01A-11D-A38G-08	TCGA-YF-AA3L-10A-01D-A38J-08
BLCA	TCGA-YF-AA3M	TCGA-YF-AA3M-01A-11D-A42E-08	TCGA-YF-AA3M-10D-01D-A42H-08
BLCA	TCGA-ZF-A9R0	TCGA-ZF-A9R0-01A-11D-A38G-08	TCGA-ZF-A9R0-10A-01D-A38J-08
BLCA	TCGA-ZF-A9R1	TCGA-ZF-A9R1-01A-11D-A391-08	TCGA-ZF-A9R1-10A-01D-A394-08
BLCA	TCGA-ZF-A9R2	TCGA-ZF-A9R2-01A-11D-A391-08	TCGA-ZF-A9R2-10A-01D-A394-08
BLCA	TCGA-ZF-A9R3	TCGA-ZF-A9R3-01A-11D-A38G-08	TCGA-ZF-A9R3-10A-01D-A38J-08
BLCA	TCGA-ZF-A9R4	TCGA-ZF-A9R4-01A-11D-A38G-08	TCGA-ZF-A9R4-10A-01D-A38J-08
BLCA	TCGA-ZF-A9R5	TCGA-ZF-A9R5-01A-12D-A42E-08	TCGA-ZF-A9R5-10A-01D-A42H-08
BLCA	TCGA-ZF-A9R7	TCGA-ZF-A9R7-01A-11D-A38G-08	TCGA-ZF-A9R7-10A-01D-A38J-08
BLCA	TCGA-ZF-A9R9	TCGA-ZF-A9R9-01A-11D-A38G-08	TCGA-ZF-A9R9-10A-01D-A38J-08
BLCA	TCGA-ZF-A9RC	TCGA-ZF-A9RC-01A-11D-A38G-08	TCGA-ZF-A9RC-10A-01D-A38J-08
BLCA	TCGA-ZF-A9RD	TCGA-ZF-A9RD-01A-11D-A42E-08	TCGA-ZF-A9RD-10A-01D-A42H-08
BLCA	TCGA-ZF-A9RE	TCGA-ZF-A9RE-01A-11D-A38G-08	TCGA-ZF-A9RE-10A-01D-A38J-08
BLCA	TCGA-ZF-A9RF	TCGA-ZF-A9RF-01A-11D-A38G-08	TCGA-ZF-A9RF-10A-01D-A38J-08
BLCA	TCGA-ZF-A9RG	TCGA-ZF-A9RG-01A-21D-A42E-08	TCGA-ZF-A9RG-10A-01D-A42H-08
BLCA	TCGA-ZF-A9RL	TCGA-ZF-A9RL-01A-11D-A38G-08	TCGA-ZF-A9RL-10A-01D-A38J-08
BLCA	TCGA-ZF-A9RM	TCGA-ZF-A9RM-01A-11D-A38G-08	TCGA-ZF-A9RM-10A-01D-A38J-08
BLCA	TCGA-ZF-A9RN	TCGA-ZF-A9RN-01A-11D-A42E-08	TCGA-ZF-A9RN-10A-01D-A42H-08
BLCA	TCGA-ZF-AA4N	TCGA-ZF-AA4N-01A-11D-A38G-08	TCGA-ZF-AA4N-10A-01D-A38J-08
BLCA	TCGA-ZF-AA4R	TCGA-ZF-AA4R-01A-11D-A38G-08	TCGA-ZF-AA4R-10A-01D-A38J-08
BLCA	TCGA-ZF-AA4T	TCGA-ZF-AA4T-01A-11D-A38G-08	TCGA-ZF-AA4T-10A-01D-A38J-08
BLCA	TCGA-ZF-AA4U	TCGA-ZF-AA4U-01A-11D-A38G-08	TCGA-ZF-AA4U-10A-01D-A38J-08
BLCA	TCGA-ZF-AA4V	TCGA-ZF-AA4V-01A-11D-A38G-08	TCGA-ZF-AA4V-10A-01D-A38J-08
BLCA	TCGA-ZF-AA4W	TCGA-ZF-AA4W-01A-12D-A38G-08	TCGA-ZF-AA4W-10A-01D-A38J-08
BLCA	TCGA-ZF-AA4X	TCGA-ZF-AA4X-01A-11D-A38G-08	TCGA-ZF-AA4X-10A-01D-A38J-08
BLCA	TCGA-ZF-AA51	TCGA-ZF-AA51-01A-21D-A391-08	TCGA-ZF-AA51-10A-01D-A394-08
BLCA	TCGA-ZF-AA52	TCGA-ZF-AA52-01A-12D-A391-08	TCGA-ZF-AA52-10A-01D-A394-08
BLCA	TCGA-ZF-AA53	TCGA-ZF-AA53-01A-11D-A391-08	TCGA-ZF-AA53-10A-01D-A394-08
BLCA	TCGA-ZF-AA54	TCGA-ZF-AA54-01A-11D-A391-08	TCGA-ZF-AA54-10A-01D-A394-08
BLCA	TCGA-ZF-AA56	TCGA-ZF-AA56-01A-31D-A391-08	TCGA-ZF-AA56-10A-01D-A394-08
BLCA	TCGA-ZF-AA58	TCGA-ZF-AA58-01A-12D-A42E-08	TCGA-ZF-AA58-10A-01D-A42H-08
BLCA	TCGA-ZF-AA5H	TCGA-ZF-AA5H-01A-11D-A391-08	TCGA-ZF-AA5H-10A-01D-A394-08
BLCA	TCGA-ZF-AA5N	TCGA-ZF-AA5N-01A-11D-A42E-08	TCGA-ZF-AA5N-10A-01D-A42H-08
BLCA	TCGA-ZF-AA5P	TCGA-ZF-AA5P-01A-11D-A391-08	TCGA-ZF-AA5P-10A-01D-A394-08

## Sheet: BRCA
TCGA Cancer type	CDR list	Tumor_Sample_Barcode	Matched_Norm_Sample_Barcode
BRCA	TCGA-3C-AAAU	TCGA-3C-AAAU-01A-11D-A41F-09	TCGA-3C-AAAU-10A-01D-A41F-09
BRCA	TCGA-3C-AALI	TCGA-3C-AALI-01A-11D-A41F-09	TCGA-3C-AALI-10A-01D-A41F-09
BRCA	TCGA-3C-AALJ	TCGA-3C-AALJ-01A-31D-A41F-09	TCGA-3C-AALJ-10A-01D-A41F-09
BRCA	TCGA-3C-AALK	TCGA-3C-AALK-01A-11D-A41F-09	TCGA-3C-AALK-10A-01D-A41F-09
BRCA	TCGA-4H-AAAK	TCGA-4H-AAAK-01A-12D-A41F-09	TCGA-4H-AAAK-10A-01D-A41F-09
BRCA	TCGA-5L-AAT0	TCGA-5L-AAT0-01A-12D-A41F-09	TCGA-5L-AAT0-10A-01D-A41F-09
BRCA	TCGA-5L-AAT1	TCGA-5L-AAT1-01A-12D-A41F-09	TCGA-5L-AAT1-10A-01D-A41F-09
BRCA	TCGA-5T-A9QA	TCGA-5T-A9QA-01A-11D-A41F-09	TCGA-5T-A9QA-10A-01D-A41F-09
BRCA	TCGA-A1-A0SB	TCGA-A1-A0SB-01A-11D-A142-09	TCGA-A1-A0SB-10B-01D-A142-09
BRCA	TCGA-A1-A0SD	TCGA-A1-A0SD-01A-11D-A10Y-09	TCGA-A1-A0SD-10A-01D-A110-09
BRCA	TCGA-A1-A0SE	TCGA-A1-A0SE-01A-11D-A099-09	TCGA-A1-A0SE-10A-03D-A099-09
BRCA	TCGA-A1-A0SF	TCGA-A1-A0SF-01A-11D-A142-09	TCGA-A1-A0SF-10B-01D-A142-09
BRCA	TCGA-A1-A0SG	TCGA-A1-A0SG-01A-11D-A142-09	TCGA-A1-A0SG-10B-01D-A17G-09
BRCA	TCGA-A1-A0SH	TCGA-A1-A0SH-01A-11D-A099-09	TCGA-A1-A0SH-10A-03D-A099-09
BRCA	TCGA-A1-A0SI	TCGA-A1-A0SI-01A-11D-A142-09	TCGA-A1-A0SI-10B-01D-A142-09
BRCA	TCGA-A1-A0SJ	TCGA-A1-A0SJ-01A-11D-A099-09	TCGA-A1-A0SJ-10A-02D-A099-09
BRCA	TCGA-A1-A0SK	TCGA-A1-A0SK-01A-12D-A099-09	TCGA-A1-A0SK-10A-03D-A099-09
BRCA	TCGA-A1-A0SM	TCGA-A1-A0SM-01A-11D-A099-09	TCGA-A1-A0SM-10A-02D-A10G-09
BRCA	TCGA-A1-A0SN	TCGA-A1-A0SN-01A-11D-A142-09	TCGA-A1-A0SN-10B-01D-A142-09
BRCA	TCGA-A1-A0SO	TCGA-A1-A0SO-01A-22D-A099-09	TCGA-A1-A0SO-10A-03D-A099-09
BRCA	TCGA-A1-A0SP	TCGA-A1-A0SP-01A-11D-A099-09	TCGA-A1-A0SP-10A-02D-A099-09
BRCA	TCGA-A1-A0SQ	TCGA-A1-A0SQ-01A-21D-A142-09	TCGA-A1-A0SQ-10B-01W-A187-09
BRCA	TCGA-A2-A04N	TCGA-A2-A04N-01A-11D-A10Y-09	TCGA-A2-A04N-10A-01D-A110-09
BRCA	TCGA-A2-A04P	TCGA-A2-A04P-01A-31D-A128-09	TCGA-A2-A04P-10A-01W-A055-09
BRCA	TCGA-A2-A04Q	TCGA-A2-A04Q-01A-21W-A050-09	TCGA-A2-A04Q-10A-01W-A055-09
BRCA	TCGA-A2-A04R	TCGA-A2-A04R-01A-41D-A117-09	TCGA-A2-A04R-10B-01D-A10G-09
BRCA	TCGA-A2-A04T	TCGA-A2-A04T-01A-21W-A050-09	TCGA-A2-A04T-10A-01W-A055-09
BRCA	TCGA-A2-A04U	TCGA-A2-A04U-01A-11D-A10Y-09	TCGA-A2-A04U-10A-01D-A110-09
BRCA	TCGA-A2-A04V	TCGA-A2-A04V-01A-21W-A050-09	TCGA-A2-A04V-10A-01W-A055-09
BRCA	TCGA-A2-A04W	TCGA-A2-A04W-01A-31D-A10Y-09	TCGA-A2-A04W-10A-01D-A110-09
BRCA	TCGA-A2-A04X	TCGA-A2-A04X-01A-21W-A050-09	TCGA-A2-A04X-10A-01W-A055-09
BRCA	TCGA-A2-A04Y	TCGA-A2-A04Y-01A-21W-A050-09	TCGA-A2-A04Y-10A-01W-A055-09
BRCA	TCGA-A2-A0CK	TCGA-A2-A0CK-01A-11D-A228-09	TCGA-A2-A0CK-10A-01D-A22A-09
BRCA	TCGA-A2-A0CL	TCGA-A2-A0CL-01A-11D-A10Y-09	TCGA-A2-A0CL-10A-01D-A110-09
BRCA	TCGA-A2-A0CM	TCGA-A2-A0CM-01A-31W-A050-09	TCGA-A2-A0CM-10A-01W-A055-09
BRCA	TCGA-A2-A0CP	TCGA-A2-A0CP-01A-11W-A050-09	TCGA-A2-A0CP-10A-01W-A055-09
BRCA	TCGA-A2-A0CQ	TCGA-A2-A0CQ-01A-21W-A050-09	TCGA-A2-A0CQ-10A-01W-A055-09
BRCA	TCGA-A2-A0CR	TCGA-A2-A0CR-01A-11D-A228-09	TCGA-A2-A0CR-10A-01D-A22A-09
BRCA	TCGA-A2-A0CS	TCGA-A2-A0CS-01A-11D-A10Y-09	TCGA-A2-A0CS-10A-01D-A110-09
BRCA	TCGA-A2-A0CT	TCGA-A2-A0CT-01A-31W-A071-09	TCGA-A2-A0CT-10A-01W-A071-09
BRCA	TCGA-A2-A0CU	TCGA-A2-A0CU-01A-12W-A050-09	TCGA-A2-A0CU-10A-01W-A055-09
BRCA	TCGA-A2-A0CV	TCGA-A2-A0CV-01A-31D-A10Y-09	TCGA-A2-A0CV-10A-01D-A110-09
BRCA	TCGA-A2-A0CW	TCGA-A2-A0CW-01A-21D-A10Y-09	TCGA-A2-A0CW-10A-01D-A110-09
BRCA	TCGA-A2-A0CX	TCGA-A2-A0CX-01A-21W-A019-09	TCGA-A2-A0CX-10A-01W-A021-09
BRCA	TCGA-A2-A0CZ	TCGA-A2-A0CZ-01A-11W-A050-09	TCGA-A2-A0CZ-10A-01W-A055-09
BRCA	TCGA-A2-A0D0	TCGA-A2-A0D0-01A-11W-A019-09	TCGA-A2-A0D0-10A-01W-A021-09
BRCA	TCGA-A2-A0D1	TCGA-A2-A0D1-01A-11W-A050-09	TCGA-A2-A0D1-10A-01W-A055-09
BRCA	TCGA-A2-A0D2	TCGA-A2-A0D2-01A-21W-A050-09	TCGA-A2-A0D2-10A-01W-A055-09
BRCA	TCGA-A2-A0D3	TCGA-A2-A0D3-01A-11D-A10Y-09	TCGA-A2-A0D3-10A-01D-A110-09
BRCA	TCGA-A2-A0D4	TCGA-A2-A0D4-01A-11W-A019-09	TCGA-A2-A0D4-10A-01W-A021-09
BRCA	TCGA-A2-A0EM	TCGA-A2-A0EM-01A-11W-A050-09	TCGA-A2-A0EM-10A-01W-A055-09
BRCA	TCGA-A2-A0EN	TCGA-A2-A0EN-01A-13D-A099-09	TCGA-A2-A0EN-10A-01D-A099-09
BRCA	TCGA-A2-A0EO	TCGA-A2-A0EO-01A-11W-A050-09	TCGA-A2-A0EO-10A-01W-A055-09
BRCA	TCGA-A2-A0EP	TCGA-A2-A0EP-01A-52D-A22X-09	TCGA-A2-A0EP-10A-01D-A22X-09
BRCA	TCGA-A2-A0EQ	TCGA-A2-A0EQ-01A-11W-A050-09	TCGA-A2-A0EQ-10A-01W-A055-09
BRCA	TCGA-A2-A0ER	TCGA-A2-A0ER-01A-21W-A050-09	TCGA-A2-A0ER-10A-01W-A055-09
BRCA	TCGA-A2-A0ES	TCGA-A2-A0ES-01A-11D-A10Y-09	TCGA-A2-A0ES-10A-01D-A110-09
BRCA	TCGA-A2-A0ET	TCGA-A2-A0ET-01A-31D-A045-09	TCGA-A2-A0ET-10A-01W-A055-09
BRCA	TCGA-A2-A0EU	TCGA-A2-A0EU-01A-22W-A071-09	TCGA-A2-A0EU-10A-01W-A071-09
BRCA	TCGA-A2-A0EV	TCGA-A2-A0EV-01A-11W-A050-09	TCGA-A2-A0EV-10A-01W-A055-09
BRCA	TCGA-A2-A0EW	TCGA-A2-A0EW-01A-21D-A10Y-09	TCGA-A2-A0EW-10A-01D-A110-09
BRCA	TCGA-A2-A0EX	TCGA-A2-A0EX-01A-21W-A050-09	TCGA-A2-A0EX-10A-01W-A055-09
BRCA	TCGA-A2-A0EY	TCGA-A2-A0EY-01A-11W-A050-09	TCGA-A2-A0EY-10A-01W-A055-09
BRCA	TCGA-A2-A0ST	TCGA-A2-A0ST-01A-12D-A099-09	TCGA-A2-A0ST-10A-01D-A099-09
BRCA	TCGA-A2-A0SU	TCGA-A2-A0SU-01A-11D-A099-09	TCGA-A2-A0SU-10A-01D-A099-09
BRCA	TCGA-A2-A0SV	TCGA-A2-A0SV-01A-11D-A099-09	TCGA-A2-A0SV-10A-01W-A097-09
BRCA	TCGA-A2-A0SW	TCGA-A2-A0SW-01A-11D-A099-09	TCGA-A2-A0SW-10A-01W-A097-09
BRCA	TCGA-A2-A0SX	TCGA-A2-A0SX-01A-12D-A099-09	TCGA-A2-A0SX-10A-01D-A099-09
BRCA	TCGA-A2-A0SY	TCGA-A2-A0SY-01A-31D-A099-09	TCGA-A2-A0SY-10A-01D-A099-09
BRCA	TCGA-A2-A0T0	TCGA-A2-A0T0-01A-22D-A099-09	TCGA-A2-A0T0-10A-01D-A099-09
BRCA	TCGA-A2-A0T1	TCGA-A2-A0T1-01A-21D-A099-09	TCGA-A2-A0T1-10A-01D-A099-09
BRCA	TCGA-A2-A0T2	TCGA-A2-A0T2-01A-11W-A097-09	TCGA-A2-A0T2-10A-01D-A099-09
BRCA	TCGA-A2-A0T3	TCGA-A2-A0T3-01A-21D-A10Y-09	TCGA-A2-A0T3-10A-01D-A110-09
BRCA	TCGA-A2-A0T4	TCGA-A2-A0T4-01A-31D-A099-09	TCGA-A2-A0T4-10A-01D-A099-09
BRCA	TCGA-A2-A0T5	TCGA-A2-A0T5-01A-21D-A099-09	TCGA-A2-A0T5-10A-01D-A099-09
BRCA	TCGA-A2-A0T6	TCGA-A2-A0T6-01A-11D-A099-09	TCGA-A2-A0T6-10A-01D-A099-09
BRCA	TCGA-A2-A0T7	TCGA-A2-A0T7-01A-21D-A099-09	TCGA-A2-A0T7-10A-01D-A099-09
BRCA	TCGA-A2-A0YC	TCGA-A2-A0YC-01A-11D-A117-09	TCGA-A2-A0YC-10A-01D-A10G-09
BRCA	TCGA-A2-A0YD	TCGA-A2-A0YD-01A-11D-A10G-09	TCGA-A2-A0YD-10A-01D-A10G-09
BRCA	TCGA-A2-A0YE	TCGA-A2-A0YE-01A-11D-A10G-09	TCGA-A2-A0YE-10A-01D-A10G-09
BRCA	TCGA-A2-A0YF	TCGA-A2-A0YF-01A-21D-A10G-09	TCGA-A2-A0YF-10A-01D-A10G-09
BRCA	TCGA-A2-A0YG	TCGA-A2-A0YG-01A-21D-A10G-09	TCGA-A2-A0YG-10A-01D-A10G-09
BRCA	TCGA-A2-A0YH	TCGA-A2-A0YH-01A-11D-A10G-09	TCGA-A2-A0YH-10A-01D-A10G-09
BRCA	TCGA-A2-A0YI	TCGA-A2-A0YI-01A-31D-A10M-09	TCGA-A2-A0YI-10A-01D-A10M-09
BRCA	TCGA-A2-A0YJ	TCGA-A2-A0YJ-01A-11D-A10G-09	TCGA-A2-A0YJ-10A-01D-A10G-09
BRCA	TCGA-A2-A0YK	TCGA-A2-A0YK-01A-22D-A117-09	TCGA-A2-A0YK-10A-01D-A117-09
BRCA	TCGA-A2-A0YL	TCGA-A2-A0YL-01A-21D-A10G-09	TCGA-A2-A0YL-10A-01D-A10G-09
BRCA	TCGA-A2-A0YM	TCGA-A2-A0YM-01A-11D-A10G-09	TCGA-A2-A0YM-10A-01D-A10G-09
BRCA	TCGA-A2-A0YT	TCGA-A2-A0YT-01A-11D-A10G-09	TCGA-A2-A0YT-10A-01D-A10G-09
BRCA	TCGA-A2-A1FV	TCGA-A2-A1FV-01A-11D-A13L-09	TCGA-A2-A1FV-10A-01D-A13O-09
BRCA	TCGA-A2-A1FW	TCGA-A2-A1FW-01A-11D-A13L-09	TCGA-A2-A1FW-10A-01D-A13O-09
BRCA	TCGA-A2-A1FX	TCGA-A2-A1FX-01A-11D-A13L-09	TCGA-A2-A1FX-10A-01D-A13O-09
BRCA	TCGA-A2-A1FZ	TCGA-A2-A1FZ-01A-51D-A17G-09	TCGA-A2-A1FZ-10A-01D-A14G-09
BRCA	TCGA-A2-A1G0	TCGA-A2-A1G0-01A-11D-A13L-09	TCGA-A2-A1G0-10A-01D-A13O-09
BRCA	TCGA-A2-A1G1	TCGA-A2-A1G1-01A-21D-A13L-09	TCGA-A2-A1G1-10A-01D-A13O-09
BRCA	TCGA-A2-A1G4	TCGA-A2-A1G4-01A-11D-A13L-09	TCGA-A2-A1G4-10A-01W-A14R-09
BRCA	TCGA-A2-A1G6	TCGA-A2-A1G6-01A-11D-A13L-09	TCGA-A2-A1G6-10A-01D-A13O-09
BRCA	TCGA-A2-A259	TCGA-A2-A259-01A-11D-A16D-09	TCGA-A2-A259-10A-01D-A16D-09
BRCA	TCGA-A2-A25A	TCGA-A2-A25A-01A-12D-A16D-09	TCGA-A2-A25A-10A-01D-A16D-09
BRCA	TCGA-A2-A25B	TCGA-A2-A25B-01A-11D-A167-09	TCGA-A2-A25B-10A-01D-A167-09
BRCA	TCGA-A2-A25C	TCGA-A2-A25C-01A-11D-A167-09	TCGA-A2-A25C-10A-01D-A167-09
BRCA	TCGA-A2-A25D	TCGA-A2-A25D-01A-12D-A16D-09	TCGA-A2-A25D-10A-01D-A16D-09
BRCA	TCGA-A2-A25E	TCGA-A2-A25E-01A-11D-A167-09	TCGA-A2-A25E-10A-01D-A167-09
BRCA	TCGA-A2-A25F	TCGA-A2-A25F-01A-11D-A167-09	TCGA-A2-A25F-10A-01D-A167-09
BRCA	TCGA-A2-A3KD	TCGA-A2-A3KD-01A-12D-A20S-09	TCGA-A2-A3KD-10A-01D-A20S-09
BRCA	TCGA-A2-A3XT	TCGA-A2-A3XT-01A-11D-A22X-09	TCGA-A2-A3XT-10A-01D-A22X-09
BRCA	TCGA-A2-A3XU	TCGA-A2-A3XU-01A-12D-A22X-09	TCGA-A2-A3XU-10A-01D-A22X-09
BRCA	TCGA-A2-A3XV	TCGA-A2-A3XV-01A-21D-A23C-09	TCGA-A2-A3XV-10A-01D-A23C-09
BRCA	TCGA-A2-A3XW	TCGA-A2-A3XW-01A-11D-A23C-09	TCGA-A2-A3XW-10A-01D-A23C-09
BRCA	TCGA-A2-A3XX	TCGA-A2-A3XX-01A-21D-A23C-09	TCGA-A2-A3XX-10A-01D-A23C-09
BRCA	TCGA-A2-A3XZ	TCGA-A2-A3XZ-01A-42D-A23C-09	TCGA-A2-A3XZ-10A-01D-A23C-09
BRCA	TCGA-A2-A3Y0	TCGA-A2-A3Y0-01A-11D-A23C-09	TCGA-A2-A3Y0-10A-01D-A23C-09
BRCA	TCGA-A2-A4S1	TCGA-A2-A4S1-01A-21D-A25Q-09	TCGA-A2-A4S1-10A-01D-A25Q-09
BRCA	TCGA-A2-A4S2	TCGA-A2-A4S2-01A-12D-A25Q-09	TCGA-A2-A4S2-10A-01D-A25Q-09
BRCA	TCGA-A2-A4S3	TCGA-A2-A4S3-01A-21D-A25Q-09	TCGA-A2-A4S3-10A-01D-A25Q-09
BRCA	TCGA-A7-A0CD	TCGA-A7-A0CD-01A-11W-A019-09	TCGA-A7-A0CD-10A-01W-A021-09
BRCA	TCGA-A7-A0CE	TCGA-A7-A0CE-01A-11W-A019-09	TCGA-A7-A0CE-10A-01W-A021-09
BRCA	TCGA-A7-A0CG	TCGA-A7-A0CG-01A-11W-A019-09	TCGA-A7-A0CG-10A-01W-A021-09
BRCA	TCGA-A7-A0CH	TCGA-A7-A0CH-01A-21W-A019-09	TCGA-A7-A0CH-10A-01W-A021-09
BRCA	TCGA-A7-A0CJ	TCGA-A7-A0CJ-01A-21W-A019-09	TCGA-A7-A0CJ-10A-01W-A021-09
BRCA	TCGA-A7-A0D9	TCGA-A7-A0D9-01A-31W-A071-09	TCGA-A7-A0D9-10A-01W-A071-09
BRCA	TCGA-A7-A0DA	TCGA-A7-A0DA-01A-31D-A10Y-09	TCGA-A7-A0DA-10A-01D-A110-09
BRCA	TCGA-A7-A0DB	TCGA-A7-A0DB-01A-11D-A272-09	TCGA-A7-A0DB-10A-02D-A272-09
BRCA	TCGA-A7-A13D	TCGA-A7-A13D-01A-13D-A272-09	TCGA-A7-A13D-10A-02D-A272-09
BRCA	TCGA-A7-A13E	TCGA-A7-A13E-01A-11D-A272-09	TCGA-A7-A13E-10A-02D-A272-09
BRCA	TCGA-A7-A13F	TCGA-A7-A13F-01A-11D-A12Q-09	TCGA-A7-A13F-10A-01D-A12Q-09
BRCA	TCGA-A7-A13G	TCGA-A7-A13G-01A-11D-A13L-09	TCGA-A7-A13G-11A-51D-A13O-09
BRCA	TCGA-A7-A26E	TCGA-A7-A26E-01A-11D-A272-09	TCGA-A7-A26E-10A-01D-A272-09
BRCA	TCGA-A7-A26F	TCGA-A7-A26F-01A-21D-A167-09	TCGA-A7-A26F-10A-01D-A167-09
BRCA	TCGA-A7-A26G	TCGA-A7-A26G-01A-21D-A167-09	TCGA-A7-A26G-10A-01D-A167-09
BRCA	TCGA-A7-A26H	TCGA-A7-A26H-01A-11D-A167-09	TCGA-A7-A26H-10A-01D-A167-09
BRCA	TCGA-A7-A26I	TCGA-A7-A26I-01A-11D-A167-09	TCGA-A7-A26I-10A-01D-A167-09
BRCA	TCGA-A7-A26J	TCGA-A7-A26J-01A-11D-A272-09	TCGA-A7-A26J-10A-01D-A272-09
BRCA	TCGA-A7-A2KD	TCGA-A7-A2KD-01A-31D-A21Q-09	TCGA-A7-A2KD-10A-01D-A21Q-09
BRCA	TCGA-A7-A3RF	TCGA-A7-A3RF-01A-11D-A228-09	TCGA-A7-A3RF-10A-01D-A22A-09
BRCA	TCGA-A7-A425	TCGA-A7-A425-01A-11D-A243-09	TCGA-A7-A425-10A-01D-A243-09
BRCA	TCGA-A7-A4SC	TCGA-A7-A4SC-01A-12D-A25Q-09	TCGA-A7-A4SC-10A-01D-A25Q-09
BRCA	TCGA-A7-A4SD	TCGA-A7-A4SD-01A-11D-A25Q-09	TCGA-A7-A4SD-10A-01D-A25Q-09
BRCA	TCGA-A7-A4SE	TCGA-A7-A4SE-01A-11D-A25Q-09	TCGA-A7-A4SE-10A-01D-A25Q-09
BRCA	TCGA-A7-A56D	TCGA-A7-A56D-01A-11D-A27P-09	TCGA-A7-A56D-10A-01D-A27P-09
BRCA	TCGA-A7-A5ZV	TCGA-A7-A5ZV-01A-11D-A28B-09	TCGA-A7-A5ZV-10A-01D-A28E-09
BRCA	TCGA-A7-A5ZW	TCGA-A7-A5ZW-01A-12D-A29N-09	TCGA-A7-A5ZW-10A-01D-A29N-09
BRCA	TCGA-A7-A5ZX	TCGA-A7-A5ZX-01A-12D-A29N-09	TCGA-A7-A5ZX-10A-01D-A29N-09
BRCA	TCGA-A7-A6VV	TCGA-A7-A6VV-01A-22D-A33E-09	TCGA-A7-A6VV-10A-01D-A33H-09
BRCA	TCGA-A7-A6VW	TCGA-A7-A6VW-01A-21D-A33E-09	TCGA-A7-A6VW-10A-01D-A33H-09
BRCA	TCGA-A7-A6VX	TCGA-A7-A6VX-01A-12D-A33E-09	TCGA-A7-A6VX-10A-01D-A33H-09
BRCA	TCGA-A7-A6VY	TCGA-A7-A6VY-01A-12D-A33E-09	TCGA-A7-A6VY-10A-01D-A33H-09
BRCA	TCGA-A8-A06N	TCGA-A8-A06N-01A-11W-A019-09	TCGA-A8-A06N-10A-01W-A021-09
BRCA	TCGA-A8-A06O	TCGA-A8-A06O-01A-11W-A019-09	TCGA-A8-A06O-10A-01W-A021-09
BRCA	TCGA-A8-A06P	TCGA-A8-A06P-01A-11W-A019-09	TCGA-A8-A06P-10A-01W-A021-09
BRCA	TCGA-A8-A06Q	TCGA-A8-A06Q-01A-11W-A050-09	TCGA-A8-A06Q-10A-01W-A055-09
BRCA	TCGA-A8-A06R	TCGA-A8-A06R-01A-11D-A015-09	TCGA-A8-A06R-10A-01W-A021-09
BRCA	TCGA-A8-A06T	TCGA-A8-A06T-01A-11W-A019-09	TCGA-A8-A06T-10A-01W-A021-09
BRCA	TCGA-A8-A06U	TCGA-A8-A06U-01A-11W-A019-09	TCGA-A8-A06U-10A-01W-A021-09
BRCA	TCGA-A8-A06X	TCGA-A8-A06X-01A-21W-A019-09	TCGA-A8-A06X-10A-01W-A021-09
BRCA	TCGA-A8-A06Y	TCGA-A8-A06Y-01A-21W-A019-09	TCGA-A8-A06Y-10A-01W-A021-09
BRCA	TCGA-A8-A06Z	TCGA-A8-A06Z-01A-11W-A019-09	TCGA-A8-A06Z-10A-01W-A021-09
BRCA	TCGA-A8-A075	TCGA-A8-A075-01A-11D-A099-09	TCGA-A8-A075-10B-01D-A099-09
BRCA	TCGA-A8-A076	TCGA-A8-A076-01A-21W-A019-09	TCGA-A8-A076-10A-01W-A021-09
BRCA	TCGA-A8-A079	TCGA-A8-A079-01A-21W-A019-09	TCGA-A8-A079-10A-01W-A021-09
BRCA	TCGA-A8-A07B	TCGA-A8-A07B-01A-11W-A019-09	TCGA-A8-A07B-10A-01W-A021-09
BRCA	TCGA-A8-A07C	TCGA-A8-A07C-01A-11D-A045-09	TCGA-A8-A07C-10A-01W-A055-09
BRCA	TCGA-A8-A07E	TCGA-A8-A07E-01A-11W-A050-09	TCGA-A8-A07E-10A-01W-A055-09
BRCA	TCGA-A8-A07F	TCGA-A8-A07F-01A-11W-A019-09	TCGA-A8-A07F-10A-01W-A021-09
BRCA	TCGA-A8-A07G	TCGA-A8-A07G-01A-11W-A050-09	TCGA-A8-A07G-10A-01W-A055-09
BRCA	TCGA-A8-A07I	TCGA-A8-A07I-01A-11W-A019-09	TCGA-A8-A07I-10A-01W-A021-09
BRCA	TCGA-A8-A07J	TCGA-A8-A07J-01A-11W-A019-09	TCGA-A8-A07J-10A-01W-A021-09
BRCA	TCGA-A8-A07L	TCGA-A8-A07L-01A-11W-A019-09	TCGA-A8-A07L-10A-01W-A021-09
BRCA	TCGA-A8-A07O	TCGA-A8-A07O-01A-11W-A019-09	TCGA-A8-A07O-10A-01W-A021-09
BRCA	TCGA-A8-A07P	TCGA-A8-A07P-01A-11W-A019-09	TCGA-A8-A07P-10A-01W-A021-09
BRCA	TCGA-A8-A07U	TCGA-A8-A07U-01A-11W-A050-09	TCGA-A8-A07U-10A-01W-A055-09
BRCA	TCGA-A8-A07W	TCGA-A8-A07W-01A-11W-A019-09	TCGA-A8-A07W-10A-01W-A021-09
BRCA	TCGA-A8-A07Z	TCGA-A8-A07Z-01A-11W-A019-09	TCGA-A8-A07Z-10A-01W-A021-09
BRCA	TCGA-A8-A081	TCGA-A8-A081-01A-11W-A019-09	TCGA-A8-A081-10A-01W-A021-09
BRCA	TCGA-A8-A082	TCGA-A8-A082-01A-11W-A019-09	TCGA-A8-A082-10A-01W-A021-09
BRCA	TCGA-A8-A083	TCGA-A8-A083-01A-21W-A019-09	TCGA-A8-A083-10A-01W-A021-09
BRCA	TCGA-A8-A084	TCGA-A8-A084-01A-21W-A019-09	TCGA-A8-A084-10A-01W-A021-09
BRCA	TCGA-A8-A085	TCGA-A8-A085-01A-11W-A019-09	TCGA-A8-A085-10A-01W-A021-09
BRCA	TCGA-A8-A086	TCGA-A8-A086-01A-11W-A019-09	TCGA-A8-A086-10A-01W-A021-09
BRCA	TCGA-A8-A08A	TCGA-A8-A08A-01A-11W-A019-09	TCGA-A8-A08A-10A-01W-A021-09
BRCA	TCGA-A8-A08B	TCGA-A8-A08B-01A-11W-A019-09	TCGA-A8-A08B-10A-01W-A021-09
BRCA	TCGA-A8-A08F	TCGA-A8-A08F-01A-11W-A019-09	TCGA-A8-A08F-10A-01W-A021-09
BRCA	TCGA-A8-A08G	TCGA-A8-A08G-01A-11W-A019-09	TCGA-A8-A08G-10A-01W-A021-09
BRCA	TCGA-A8-A08H	TCGA-A8-A08H-01A-21W-A019-09	TCGA-A8-A08H-10A-01W-A021-09
BRCA	TCGA-A8-A08I	TCGA-A8-A08I-01A-11W-A019-09	TCGA-A8-A08I-10A-01W-A021-09
BRCA	TCGA-A8-A08J	TCGA-A8-A08J-01A-11W-A019-09	TCGA-A8-A08J-10A-01W-A021-09
BRCA	TCGA-A8-A08L	TCGA-A8-A08L-01A-11W-A019-09	TCGA-A8-A08L-10A-01W-A021-09
BRCA	TCGA-A8-A08O	TCGA-A8-A08O-01A-21W-A071-09	TCGA-A8-A08O-10A-01W-A071-09
BRCA	TCGA-A8-A08P	TCGA-A8-A08P-01A-11W-A019-09	TCGA-A8-A08P-10A-01W-A021-09
BRCA	TCGA-A8-A08R	TCGA-A8-A08R-01A-11W-A050-09	TCGA-A8-A08R-10A-01W-A055-09
BRCA	TCGA-A8-A08S	TCGA-A8-A08S-01A-11W-A050-09	TCGA-A8-A08S-10A-01W-A055-09
BRCA	TCGA-A8-A08T	TCGA-A8-A08T-01A-21W-A019-09	TCGA-A8-A08T-10A-01W-A021-09
BRCA	TCGA-A8-A08X	TCGA-A8-A08X-01A-21W-A019-09	TCGA-A8-A08X-10A-01W-A021-09
BRCA	TCGA-A8-A08Z	TCGA-A8-A08Z-01A-21W-A019-09	TCGA-A8-A08Z-10A-01W-A021-09
BRCA	TCGA-A8-A090	TCGA-A8-A090-01A-11W-A019-09	TCGA-A8-A090-10A-01W-A021-09
BRCA	TCGA-A8-A091	TCGA-A8-A091-01A-11W-A019-09	TCGA-A8-A091-10A-01W-A021-09
BRCA	TCGA-A8-A092	TCGA-A8-A092-01A-11W-A019-09	TCGA-A8-A092-10A-01W-A021-09
BRCA	TCGA-A8-A093	TCGA-A8-A093-01A-11W-A019-09	TCGA-A8-A093-10A-01W-A021-09
BRCA	TCGA-A8-A094	TCGA-A8-A094-01A-11W-A019-09	TCGA-A8-A094-10A-01W-A021-09
BRCA	TCGA-A8-A095	TCGA-A8-A095-01A-11W-A019-09	TCGA-A8-A095-10A-01W-A021-09
BRCA	TCGA-A8-A096	TCGA-A8-A096-01A-11W-A019-09	TCGA-A8-A096-10A-01W-A021-09
BRCA	TCGA-A8-A097	TCGA-A8-A097-01A-11W-A050-09	TCGA-A8-A097-10A-01D-A047-09
BRCA	TCGA-A8-A099	TCGA-A8-A099-01A-11W-A019-09	TCGA-A8-A099-10A-01W-A021-09
BRCA	TCGA-A8-A09A	TCGA-A8-A09A-01A-11W-A019-09	TCGA-A8-A09A-10A-01W-A062-09
BRCA	TCGA-A8-A09B	TCGA-A8-A09B-01A-11W-A019-09	TCGA-A8-A09B-10A-01W-A021-09
BRCA	TCGA-A8-A09C	TCGA-A8-A09C-01A-11W-A019-09	TCGA-A8-A09C-10A-01W-A021-09
BRCA	TCGA-A8-A09D	TCGA-A8-A09D-01A-11W-A019-09	TCGA-A8-A09D-10A-01W-A021-09
BRCA	TCGA-A8-A09E	TCGA-A8-A09E-01A-11W-A019-09	TCGA-A8-A09E-10A-01W-A021-09
BRCA	TCGA-A8-A09G	TCGA-A8-A09G-01A-21W-A019-09	TCGA-A8-A09G-10A-01W-A021-09
BRCA	TCGA-A8-A09I	TCGA-A8-A09I-01A-22W-A050-09	TCGA-A8-A09I-10A-01W-A055-09
BRCA	TCGA-A8-A09K	TCGA-A8-A09K-01A-11W-A019-09	TCGA-A8-A09K-10A-01W-A021-09
BRCA	TCGA-A8-A09M	TCGA-A8-A09M-01A-11W-A019-09	TCGA-A8-A09M-10A-01W-A021-09
BRCA	TCGA-A8-A09N	TCGA-A8-A09N-01A-11W-A019-09	TCGA-A8-A09N-10A-01W-A021-09
BRCA	TCGA-A8-A09Q	TCGA-A8-A09Q-01A-11W-A019-09	TCGA-A8-A09Q-10A-01W-A021-09
BRCA	TCGA-A8-A09R	TCGA-A8-A09R-01A-11W-A019-09	TCGA-A8-A09R-10A-01W-A021-09
BRCA	TCGA-A8-A09T	TCGA-A8-A09T-01A-11W-A019-09	TCGA-A8-A09T-10A-01W-A021-09
BRCA	TCGA-A8-A09V	TCGA-A8-A09V-01A-11D-A045-09	TCGA-A8-A09V-10A-01W-A055-09
BRCA	TCGA-A8-A09W	TCGA-A8-A09W-01A-11W-A019-09	TCGA-A8-A09W-10A-01W-A021-09
BRCA	TCGA-A8-A09X	TCGA-A8-A09X-01A-11W-A019-09	TCGA-A8-A09X-10A-01W-A021-09
BRCA	TCGA-A8-A09Z	TCGA-A8-A09Z-01A-11W-A019-09	TCGA-A8-A09Z-10A-01W-A021-09
BRCA	TCGA-A8-A0A1	TCGA-A8-A0A1-01A-11W-A019-09	TCGA-A8-A0A1-10A-01W-A021-09
BRCA	TCGA-A8-A0A2	TCGA-A8-A0A2-01A-11W-A050-09	TCGA-A8-A0A2-10A-01W-A055-09
BRCA	TCGA-A8-A0A4	TCGA-A8-A0A4-01A-11W-A019-09	TCGA-A8-A0A4-10A-01W-A021-09
BRCA	TCGA-A8-A0A6	TCGA-A8-A0A6-01A-12W-A071-09	TCGA-A8-A0A6-10A-01W-A071-09
BRCA	TCGA-A8-A0A7	TCGA-A8-A0A7-01A-11W-A019-09	TCGA-A8-A0A7-10A-01W-A021-09
BRCA	TCGA-A8-A0A9	TCGA-A8-A0A9-01A-11W-A019-09	TCGA-A8-A0A9-10A-01W-A021-09
BRCA	TCGA-A8-A0AB	TCGA-A8-A0AB-01A-11W-A050-09	TCGA-A8-A0AB-10A-01W-A055-09
BRCA	TCGA-A8-A0AD	TCGA-A8-A0AD-01A-11W-A071-09	TCGA-A8-A0AD-10A-01W-A071-09
BRCA	TCGA-AC-A23C	TCGA-AC-A23C-01A-12D-A167-09	TCGA-AC-A23C-10A-01D-A167-09
BRCA	TCGA-AC-A23E	TCGA-AC-A23E-01A-11D-A159-09	TCGA-AC-A23E-10A-01D-A159-09
BRCA	TCGA-AC-A23H	TCGA-AC-A23H-01A-11D-A159-09	TCGA-AC-A23H-11A-12D-A17G-09
BRCA	TCGA-AC-A2B8	TCGA-AC-A2B8-01A-11D-A17D-09	TCGA-AC-A2B8-10A-01D-A17D-09
BRCA	TCGA-AC-A2BK	TCGA-AC-A2BK-01A-11D-A21Q-09	TCGA-AC-A2BK-11A-13D-A21Q-09
BRCA	TCGA-AC-A2BM	TCGA-AC-A2BM-01A-11D-A21Q-09	TCGA-AC-A2BM-11A-13D-A21Q-09
BRCA	TCGA-AC-A2FB	TCGA-AC-A2FB-01A-11D-A17D-09	TCGA-AC-A2FB-11A-13D-A19T-09
BRCA	TCGA-AC-A2FF	TCGA-AC-A2FF-01A-11D-A17D-09	TCGA-AC-A2FF-11A-13D-A17D-09
BRCA	TCGA-AC-A2FG	TCGA-AC-A2FG-01A-11D-A17D-09	TCGA-AC-A2FG-11A-22D-A17D-09
BRCA	TCGA-AC-A2FO	TCGA-AC-A2FO-01A-11D-A17W-09	TCGA-AC-A2FO-11A-12D-A17W-09
BRCA	TCGA-AC-A2QH	TCGA-AC-A2QH-01A-11D-A18P-09	TCGA-AC-A2QH-10A-01D-A18P-09
BRCA	TCGA-AC-A3HN	TCGA-AC-A3HN-01A-11D-A20S-09	TCGA-AC-A3HN-10A-01D-A20S-09
BRCA	TCGA-AC-A3OD	TCGA-AC-A3OD-01A-11D-A21Q-09	TCGA-AC-A3OD-10A-01D-A21Q-09
BRCA	TCGA-AC-A3QP	TCGA-AC-A3QP-01A-11D-A22X-09	TCGA-AC-A3QP-10B-01D-A22X-09
BRCA	TCGA-AC-A3QQ	TCGA-AC-A3QQ-01A-11D-A228-09	TCGA-AC-A3QQ-10A-01D-A22A-09
BRCA	TCGA-AC-A3W5	TCGA-AC-A3W5-01A-11D-A228-09	TCGA-AC-A3W5-10A-01D-A22A-09
BRCA	TCGA-AC-A3YI	TCGA-AC-A3YI-01A-21D-A23C-09	TCGA-AC-A3YI-10A-01D-A23C-09
BRCA	TCGA-AC-A3YJ	TCGA-AC-A3YJ-01A-11D-A22X-09	TCGA-AC-A3YJ-10A-01D-A22X-09
BRCA	TCGA-AC-A4ZE	TCGA-AC-A4ZE-01A-11D-A41F-09	TCGA-AC-A4ZE-10B-01D-A41F-09
BRCA	TCGA-AC-A5EH	TCGA-AC-A5EH-01A-11D-A28B-09	TCGA-AC-A5EH-10A-01D-A28E-09
BRCA	TCGA-AC-A5EI	TCGA-AC-A5EI-01A-11D-A27P-09	TCGA-AC-A5EI-10A-01D-A27P-09
BRCA	TCGA-AC-A5XS	TCGA-AC-A5XS-01A-11D-A29N-09	TCGA-AC-A5XS-10A-01D-A29N-09
BRCA	TCGA-AC-A5XU	TCGA-AC-A5XU-01A-11D-A28B-09	TCGA-AC-A5XU-10A-01D-A28E-09
BRCA	TCGA-AC-A62V	TCGA-AC-A62V-01A-11D-A31U-09	TCGA-AC-A62V-10A-01D-A31U-09
BRCA	TCGA-AC-A62X	TCGA-AC-A62X-01A-11D-A29N-09	TCGA-AC-A62X-10A-01D-A29N-09
BRCA	TCGA-AC-A62Y	TCGA-AC-A62Y-01A-11D-A29N-09	TCGA-AC-A62Y-10A-01D-A29N-09
BRCA	TCGA-AC-A6IV	TCGA-AC-A6IV-01A-12D-A33E-09	TCGA-AC-A6IV-10A-01D-A33H-09
BRCA	TCGA-AC-A6IW	TCGA-AC-A6IW-01A-12D-A33E-09	TCGA-AC-A6IW-10A-01D-A33H-09
BRCA	TCGA-AC-A6IX	TCGA-AC-A6IX-01A-12D-A32I-09	TCGA-AC-A6IX-10A-01D-A32I-09
BRCA	TCGA-AC-A6NO	TCGA-AC-A6NO-01A-12D-A33E-09	TCGA-AC-A6NO-10A-01D-A33H-09
BRCA	TCGA-AC-A7VB	TCGA-AC-A7VB-01A-11D-A351-09	TCGA-AC-A7VB-10A-01D-A351-09
BRCA	TCGA-AC-A7VC	TCGA-AC-A7VC-01A-11D-A351-09	TCGA-AC-A7VC-10A-01D-A351-09
BRCA	TCGA-AC-A8OP	TCGA-AC-A8OP-01A-11D-A36J-09	TCGA-AC-A8OP-10A-01D-A36M-09
BRCA	TCGA-AC-A8OQ	TCGA-AC-A8OQ-01A-11D-A41F-09	TCGA-AC-A8OQ-10A-01D-A41F-09
BRCA	TCGA-AC-A8OR	TCGA-AC-A8OR-01A-21D-A41F-09	TCGA-AC-A8OR-10A-01D-A41F-09
BRCA	TCGA-AC-A8OS	TCGA-AC-A8OS-01A-12D-A41F-09	TCGA-AC-A8OS-10A-01D-A41F-09
BRCA	TCGA-AN-A03X	TCGA-AN-A03X-01A-21W-A019-09	TCGA-AN-A03X-10A-01W-A021-09
BRCA	TCGA-AN-A03Y	TCGA-AN-A03Y-01A-21W-A019-09	TCGA-AN-A03Y-10A-01W-A021-09
BRCA	TCGA-AN-A041	TCGA-AN-A041-01A-11W-A050-09	TCGA-AN-A041-10A-01W-A055-09
BRCA	TCGA-AN-A046	TCGA-AN-A046-01A-21W-A050-09	TCGA-AN-A046-10A-01W-A055-09
BRCA	TCGA-AN-A049	TCGA-AN-A049-01A-21W-A019-09	TCGA-AN-A049-10A-01W-A021-09
BRCA	TCGA-AN-A04A	TCGA-AN-A04A-01A-21W-A050-09	TCGA-AN-A04A-10A-01W-A055-09
BRCA	TCGA-AN-A04C	TCGA-AN-A04C-01A-21W-A050-09	TCGA-AN-A04C-10A-01D-A047-09
BRCA	TCGA-AN-A04D	TCGA-AN-A04D-01A-21W-A050-09	TCGA-AN-A04D-10A-01W-A055-09
BRCA	TCGA-AN-A0AJ	TCGA-AN-A0AJ-01A-11W-A019-09	TCGA-AN-A0AJ-10A-01W-A021-09
BRCA	TCGA-AN-A0AK	TCGA-AN-A0AK-01A-21W-A019-09	TCGA-AN-A0AK-10A-01W-A021-09
BRCA	TCGA-AN-A0AL	TCGA-AN-A0AL-01A-11W-A019-09	TCGA-AN-A0AL-10A-01W-A021-09
BRCA	TCGA-AN-A0AM	TCGA-AN-A0AM-01A-11W-A050-09	TCGA-AN-A0AM-10A-01W-A055-09
BRCA	TCGA-AN-A0AR	TCGA-AN-A0AR-01A-11W-A019-09	TCGA-AN-A0AR-10A-01W-A021-09
BRCA	TCGA-AN-A0AS	TCGA-AN-A0AS-01A-11W-A019-09	TCGA-AN-A0AS-10A-01W-A021-09
BRCA	TCGA-AN-A0AT	TCGA-AN-A0AT-01A-11D-A045-09	TCGA-AN-A0AT-10A-01W-A055-09
BRCA	TCGA-AN-A0FD	TCGA-AN-A0FD-01A-11W-A050-09	TCGA-AN-A0FD-10A-01W-A055-09
BRCA	TCGA-AN-A0FF	TCGA-AN-A0FF-01A-11W-A050-09	TCGA-AN-A0FF-10A-01W-A055-09
BRCA	TCGA-AN-A0FJ	TCGA-AN-A0FJ-01A-11W-A019-09	TCGA-AN-A0FJ-10A-01W-A021-09
BRCA	TCGA-AN-A0FK	TCGA-AN-A0FK-01A-11W-A050-09	TCGA-AN-A0FK-10A-01W-A055-09
BRCA	TCGA-AN-A0FL	TCGA-AN-A0FL-01A-11W-A050-09	TCGA-AN-A0FL-10A-01W-A055-09
BRCA	TCGA-AN-A0FN	TCGA-AN-A0FN-01A-11W-A050-09	TCGA-AN-A0FN-10A-01W-A055-09
BRCA	TCGA-AN-A0FS	TCGA-AN-A0FS-01A-11W-A050-09	TCGA-AN-A0FS-10A-01W-A055-09
BRCA	TCGA-AN-A0FT	TCGA-AN-A0FT-01A-11W-A050-09	TCGA-AN-A0FT-10A-01W-A055-09
BRCA	TCGA-AN-A0FV	TCGA-AN-A0FV-01A-11W-A019-09	TCGA-AN-A0FV-10A-01W-A021-09
BRCA	TCGA-AN-A0FW	TCGA-AN-A0FW-01A-11W-A050-09	TCGA-AN-A0FW-10A-01W-A055-09
BRCA	TCGA-AN-A0FX	TCGA-AN-A0FX-01A-11W-A050-09	TCGA-AN-A0FX-10A-01W-A055-09
BRCA	TCGA-AN-A0FY	TCGA-AN-A0FY-01A-11W-A050-09	TCGA-AN-A0FY-10A-01D-A047-09
BRCA	TCGA-AN-A0FZ	TCGA-AN-A0FZ-01A-11W-A050-09	TCGA-AN-A0FZ-10A-01W-A055-09
BRCA	TCGA-AN-A0G0	TCGA-AN-A0G0-01A-11W-A050-09	TCGA-AN-A0G0-10A-01W-A055-09
BRCA	TCGA-AN-A0XL	TCGA-AN-A0XL-01A-11D-A10M-09	TCGA-AN-A0XL-10A-01D-A10M-09
BRCA	TCGA-AN-A0XN	TCGA-AN-A0XN-01A-21D-A10G-09	TCGA-AN-A0XN-10A-01D-A10G-09
BRCA	TCGA-AN-A0XO	TCGA-AN-A0XO-01A-11D-A10G-09	TCGA-AN-A0XO-10A-01D-A10G-09
BRCA	TCGA-AN-A0XP	TCGA-AN-A0XP-01A-11D-A117-09	TCGA-AN-A0XP-10A-01D-A10G-09
BRCA	TCGA-AN-A0XR	TCGA-AN-A0XR-01A-11D-A10G-09	TCGA-AN-A0XR-10A-01D-A117-09
BRCA	TCGA-AN-A0XS	TCGA-AN-A0XS-01A-22D-A10G-09	TCGA-AN-A0XS-10A-01D-A10G-09
BRCA	TCGA-AN-A0XT	TCGA-AN-A0XT-01A-11D-A10G-09	TCGA-AN-A0XT-10A-01D-A10G-09
BRCA	TCGA-AN-A0XU	TCGA-AN-A0XU-01A-11D-A10G-09	TCGA-AN-A0XU-10A-01D-A10G-09
BRCA	TCGA-AN-A0XV	TCGA-AN-A0XV-01A-11D-A10G-09	TCGA-AN-A0XV-10A-01D-A10G-09
BRCA	TCGA-AN-A0XW	TCGA-AN-A0XW-01A-11D-A10G-09	TCGA-AN-A0XW-10A-01D-A10G-09
BRCA	TCGA-AO-A03L	TCGA-AO-A03L-01A-41W-A071-09	TCGA-AO-A03L-10A-01W-A071-09
BRCA	TCGA-AO-A03M	TCGA-AO-A03M-01B-11D-A10M-09	TCGA-AO-A03M-10A-01D-A10M-09
BRCA	TCGA-AO-A03N	TCGA-AO-A03N-01B-11D-A10M-09	TCGA-AO-A03N-10A-01D-A10M-09
BRCA	TCGA-AO-A03O	TCGA-AO-A03O-01A-11W-A019-09	TCGA-AO-A03O-10A-01W-A021-09
BRCA	TCGA-AO-A03P	TCGA-AO-A03P-01A-11W-A019-09	TCGA-AO-A03P-10A-01W-A021-09
BRCA	TCGA-AO-A03R	TCGA-AO-A03R-01A-21W-A050-09	TCGA-AO-A03R-10A-01W-A055-09
BRCA	TCGA-AO-A03T	TCGA-AO-A03T-01A-21W-A050-09	TCGA-AO-A03T-10A-01W-A055-09
BRCA	TCGA-AO-A03U	TCGA-AO-A03U-01B-21D-A10M-09	TCGA-AO-A03U-10A-01D-A10M-09
BRCA	TCGA-AO-A03V	TCGA-AO-A03V-01A-11D-A10Y-09	TCGA-AO-A03V-10A-01D-A110-09
BRCA	TCGA-AO-A0J2	TCGA-AO-A0J2-01A-11W-A050-09	TCGA-AO-A0J2-10A-01W-A055-09
BRCA	TCGA-AO-A0J3	TCGA-AO-A0J3-01A-11W-A050-09	TCGA-AO-A0J3-10A-01W-A055-09
BRCA	TCGA-AO-A0J4	TCGA-AO-A0J4-01A-11W-A050-09	TCGA-AO-A0J4-10A-01W-A055-09
BRCA	TCGA-AO-A0J5	TCGA-AO-A0J5-01A-11W-A050-09	TCGA-AO-A0J5-10A-01W-A055-09
BRCA	TCGA-AO-A0J6	TCGA-AO-A0J6-01A-11W-A050-09	TCGA-AO-A0J6-10A-01W-A055-09
BRCA	TCGA-AO-A0J7	TCGA-AO-A0J7-01A-11W-A050-09	TCGA-AO-A0J7-10A-01W-A055-09
BRCA	TCGA-AO-A0J8	TCGA-AO-A0J8-01A-21D-A045-09	TCGA-AO-A0J8-10A-01W-A055-09
BRCA	TCGA-AO-A0J9	TCGA-AO-A0J9-01A-11W-A050-09	TCGA-AO-A0J9-10A-01W-A055-09
BRCA	TCGA-AO-A0JA	TCGA-AO-A0JA-01A-11W-A071-09	TCGA-AO-A0JA-10A-01W-A071-09
BRCA	TCGA-AO-A0JB	TCGA-AO-A0JB-01A-11W-A071-09	TCGA-AO-A0JB-10A-01W-A071-09
BRCA	TCGA-AO-A0JC	TCGA-AO-A0JC-01A-11W-A071-09	TCGA-AO-A0JC-10A-01W-A071-09
BRCA	TCGA-AO-A0JD	TCGA-AO-A0JD-01A-11W-A071-09	TCGA-AO-A0JD-10A-01W-A071-09
BRCA	TCGA-AO-A0JE	TCGA-AO-A0JE-01A-11W-A071-09	TCGA-AO-A0JE-10A-01W-A071-09
BRCA	TCGA-AO-A0JF	TCGA-AO-A0JF-01A-11W-A071-09	TCGA-AO-A0JF-10A-01W-A071-09
BRCA	TCGA-AO-A0JG	TCGA-AO-A0JG-01A-31D-A099-09	TCGA-AO-A0JG-10A-01D-A099-09
BRCA	TCGA-AO-A0JI	TCGA-AO-A0JI-01A-21W-A100-09	TCGA-AO-A0JI-10A-01W-A100-09
BRCA	TCGA-AO-A0JJ	TCGA-AO-A0JJ-01A-11W-A071-09	TCGA-AO-A0JJ-10A-01W-A071-09
BRCA	TCGA-AO-A0JM	TCGA-AO-A0JM-01A-21W-A071-09	TCGA-AO-A0JM-10A-01W-A071-09
BRCA	TCGA-AO-A124	TCGA-AO-A124-01A-11D-A10M-09	TCGA-AO-A124-10A-01D-A10M-09
BRCA	TCGA-AO-A125	TCGA-AO-A125-01A-11D-A10M-09	TCGA-AO-A125-10A-01D-A10M-09
BRCA	TCGA-AO-A126	TCGA-AO-A126-01A-11D-A10M-09	TCGA-AO-A126-10A-01D-A10M-09
BRCA	TCGA-AO-A128	TCGA-AO-A128-01A-11D-A10M-09	TCGA-AO-A128-10A-01D-A10M-09
BRCA	TCGA-AO-A129	TCGA-AO-A129-01A-21D-A10M-09	TCGA-AO-A129-10A-01D-A10M-09
BRCA	TCGA-AO-A12A	TCGA-AO-A12A-01A-21D-A10Y-09	TCGA-AO-A12A-10A-01D-A110-09
BRCA	TCGA-AO-A12B	TCGA-AO-A12B-01A-11D-A10M-09	TCGA-AO-A12B-10A-01D-A10M-09
BRCA	TCGA-AO-A12D	TCGA-AO-A12D-01A-11D-A10Y-09	TCGA-AO-A12D-10A-01D-A110-09
BRCA	TCGA-AO-A12E	TCGA-AO-A12E-01A-11D-A10M-09	TCGA-AO-A12E-10A-01D-A10M-09
BRCA	TCGA-AO-A12F	TCGA-AO-A12F-01A-11D-A10Y-09	TCGA-AO-A12F-10A-01D-A110-09
BRCA	TCGA-AO-A12G	TCGA-AO-A12G-01A-11D-A10M-09	TCGA-AO-A12G-10A-01D-A10M-09
BRCA	TCGA-AO-A12H	TCGA-AO-A12H-01A-11D-A10Y-09	TCGA-AO-A12H-10A-01D-A110-09
BRCA	TCGA-AO-A1KO	TCGA-AO-A1KO-01A-31D-A188-09	TCGA-AO-A1KO-10A-01D-A13O-09
BRCA	TCGA-AO-A1KP	TCGA-AO-A1KP-01A-11D-A13L-09	TCGA-AO-A1KP-10A-01W-A14R-09
BRCA	TCGA-AO-A1KR	TCGA-AO-A1KR-01A-12D-A142-09	TCGA-AO-A1KR-10A-01D-A142-09
BRCA	TCGA-AO-A1KS	TCGA-AO-A1KS-01A-11D-A13L-09	TCGA-AO-A1KS-10A-01W-A14R-09
BRCA	TCGA-AO-A1KT	TCGA-AO-A1KT-01A-11D-A13L-09	TCGA-AO-A1KT-10A-01D-A188-09
BRCA	TCGA-AQ-A04H	TCGA-AQ-A04H-01B-11D-A10M-09	TCGA-AQ-A04H-10A-01D-A10M-09
BRCA	TCGA-AQ-A04J	TCGA-AQ-A04J-01A-02W-A050-09	TCGA-AQ-A04J-10A-01W-A055-09
BRCA	TCGA-AQ-A0Y5	TCGA-AQ-A0Y5-01A-11D-A14K-09	TCGA-AQ-A0Y5-10A-01D-A17G-09
BRCA	TCGA-AQ-A1H2	TCGA-AQ-A1H2-01A-11D-A13L-09	TCGA-AQ-A1H2-10A-01D-A13O-09
BRCA	TCGA-AQ-A1H3	TCGA-AQ-A1H3-01A-31D-A13L-09	TCGA-AQ-A1H3-10A-01D-A188-09
BRCA	TCGA-AQ-A54O	TCGA-AQ-A54O-01A-11D-A25Q-09	TCGA-AQ-A54O-10A-01D-A25Q-09
BRCA	TCGA-AQ-A7U7	TCGA-AQ-A7U7-01A-22D-A351-09	TCGA-AQ-A7U7-10A-01D-A351-09
BRCA	TCGA-AR-A0TP	TCGA-AR-A0TP-01A-11D-A099-09	TCGA-AR-A0TP-10A-01D-A099-09
BRCA	TCGA-AR-A0TQ	TCGA-AR-A0TQ-01A-11D-A099-09	TCGA-AR-A0TQ-10A-01D-A099-09
BRCA	TCGA-AR-A0TR	TCGA-AR-A0TR-01A-11D-A099-09	TCGA-AR-A0TR-10A-01D-A099-09
BRCA	TCGA-AR-A0TS	TCGA-AR-A0TS-01A-11D-A10Y-09	TCGA-AR-A0TS-10A-01D-A110-09
BRCA	TCGA-AR-A0TT	TCGA-AR-A0TT-01A-31D-A099-09	TCGA-AR-A0TT-10A-01D-A099-09
BRCA	TCGA-AR-A0TU	TCGA-AR-A0TU-01A-31D-A10G-09	TCGA-AR-A0TU-10A-01D-A10G-09
BRCA	TCGA-AR-A0TV	TCGA-AR-A0TV-01A-21D-A099-09	TCGA-AR-A0TV-10A-01D-A099-09
BRCA	TCGA-AR-A0TW	TCGA-AR-A0TW-01A-11D-A099-09	TCGA-AR-A0TW-10A-01D-A099-09
BRCA	TCGA-AR-A0TX	TCGA-AR-A0TX-01A-11D-A099-09	TCGA-AR-A0TX-10A-01D-A099-09
BRCA	TCGA-AR-A0TY	TCGA-AR-A0TY-01A-12W-A12T-09	TCGA-AR-A0TY-10A-01D-A110-09
BRCA	TCGA-AR-A0TZ	TCGA-AR-A0TZ-01A-12D-A099-09	TCGA-AR-A0TZ-10A-01D-A099-09
BRCA	TCGA-AR-A0U0	TCGA-AR-A0U0-01A-11D-A10G-09	TCGA-AR-A0U0-10A-01D-A10G-09
BRCA	TCGA-AR-A0U1	TCGA-AR-A0U1-01A-11D-A10Y-09	TCGA-AR-A0U1-10A-01D-A110-09
BRCA	TCGA-AR-A0U2	TCGA-AR-A0U2-01A-11D-A10G-09	TCGA-AR-A0U2-10A-01D-A10G-09
BRCA	TCGA-AR-A0U3	TCGA-AR-A0U3-01A-11D-A10G-09	TCGA-AR-A0U3-10A-01D-A10G-09
BRCA	TCGA-AR-A0U4	TCGA-AR-A0U4-01A-11D-A117-09	TCGA-AR-A0U4-10A-01D-A10G-09
BRCA	TCGA-AR-A1AH	TCGA-AR-A1AH-01A-11D-A12B-09	TCGA-AR-A1AH-10A-01D-A12B-09
BRCA	TCGA-AR-A1AI	TCGA-AR-A1AI-01A-11D-A12Q-09	TCGA-AR-A1AI-10A-01D-A12Q-09
BRCA	TCGA-AR-A1AJ	TCGA-AR-A1AJ-01A-21D-A12Q-09	TCGA-AR-A1AJ-10A-01D-A12Q-09
BRCA	TCGA-AR-A1AK	TCGA-AR-A1AK-01A-21D-A12Q-09	TCGA-AR-A1AK-10A-01D-A12Q-09
BRCA	TCGA-AR-A1AL	TCGA-AR-A1AL-01A-21D-A12Q-09	TCGA-AR-A1AL-10A-01D-A12Q-09
BRCA	TCGA-AR-A1AN	TCGA-AR-A1AN-01A-11D-A12Q-09	TCGA-AR-A1AN-10A-01D-A12Q-09
BRCA	TCGA-AR-A1AO	TCGA-AR-A1AO-01A-11D-A12Q-09	TCGA-AR-A1AO-10A-01D-A12Q-09
BRCA	TCGA-AR-A1AP	TCGA-AR-A1AP-01A-11D-A12Q-09	TCGA-AR-A1AP-10A-01D-A12Q-09
BRCA	TCGA-AR-A1AQ	TCGA-AR-A1AQ-01A-11D-A12Q-09	TCGA-AR-A1AQ-10A-01D-A12Q-09
BRCA	TCGA-AR-A1AR	TCGA-AR-A1AR-01A-31D-A135-09	TCGA-AR-A1AR-10A-01D-A135-09
BRCA	TCGA-AR-A1AS	TCGA-AR-A1AS-01A-11D-A12Q-09	TCGA-AR-A1AS-10A-01D-A12Q-09
BRCA	TCGA-AR-A1AT	TCGA-AR-A1AT-01A-11D-A12Q-09	TCGA-AR-A1AT-10A-01D-A12Q-09
BRCA	TCGA-AR-A1AU	TCGA-AR-A1AU-01A-11D-A12Q-09	TCGA-AR-A1AU-10A-01D-A12Q-09
BRCA	TCGA-AR-A1AV	TCGA-AR-A1AV-01A-21D-A12Q-09	TCGA-AR-A1AV-10A-01D-A12Q-09
BRCA	TCGA-AR-A1AW	TCGA-AR-A1AW-01A-21D-A12Q-09	TCGA-AR-A1AW-10A-01D-A12Q-09
BRCA	TCGA-AR-A1AX	TCGA-AR-A1AX-01A-11D-A12Q-09	TCGA-AR-A1AX-10A-01D-A12Q-09
BRCA	TCGA-AR-A1AY	TCGA-AR-A1AY-01A-21D-A12Q-09	TCGA-AR-A1AY-10A-01D-A12Q-09
BRCA	TCGA-AR-A24H	TCGA-AR-A24H-01A-11D-A167-09	TCGA-AR-A24H-10A-01D-A167-09
BRCA	TCGA-AR-A24K	TCGA-AR-A24K-01A-11D-A167-09	TCGA-AR-A24K-10A-01D-A167-09
BRCA	TCGA-AR-A24L	TCGA-AR-A24L-01A-11D-A167-09	TCGA-AR-A24L-10A-01D-A167-09
BRCA	TCGA-AR-A24M	TCGA-AR-A24M-01A-11D-A167-09	TCGA-AR-A24M-10A-01D-A167-09
BRCA	TCGA-AR-A24N	TCGA-AR-A24N-01A-11D-A167-09	TCGA-AR-A24N-10A-01D-A167-09
BRCA	TCGA-AR-A24O	TCGA-AR-A24O-01A-11D-A167-09	TCGA-AR-A24O-10A-01D-A167-09
BRCA	TCGA-AR-A24P	TCGA-AR-A24P-01A-11D-A167-09	TCGA-AR-A24P-10A-01D-A167-09
BRCA	TCGA-AR-A24Q	TCGA-AR-A24Q-01A-12D-A167-09	TCGA-AR-A24Q-10A-01D-A167-09
BRCA	TCGA-AR-A24R	TCGA-AR-A24R-01A-11D-A167-09	TCGA-AR-A24R-10A-01D-A167-09
BRCA	TCGA-AR-A24S	TCGA-AR-A24S-01A-11D-A167-09	TCGA-AR-A24S-10A-01D-A167-09
BRCA	TCGA-AR-A24T	TCGA-AR-A24T-01A-11D-A167-09	TCGA-AR-A24T-10A-01D-A167-09
BRCA	TCGA-AR-A24U	TCGA-AR-A24U-01A-11D-A167-09	TCGA-AR-A24U-10A-01D-A167-09
BRCA	TCGA-AR-A24V	TCGA-AR-A24V-01A-21D-A167-09	TCGA-AR-A24V-10A-01D-A167-09
BRCA	TCGA-AR-A24W	TCGA-AR-A24W-01A-11D-A17G-09	TCGA-AR-A24W-10A-01D-A167-09
BRCA	TCGA-AR-A24X	TCGA-AR-A24X-01A-11D-A167-09	TCGA-AR-A24X-10A-01D-A167-09
BRCA	TCGA-AR-A24Z	TCGA-AR-A24Z-01A-11D-A167-09	TCGA-AR-A24Z-10A-01D-A167-09
BRCA	TCGA-AR-A250	TCGA-AR-A250-01A-31D-A167-09	TCGA-AR-A250-10A-01D-A167-09
BRCA	TCGA-AR-A251	TCGA-AR-A251-01A-12D-A167-09	TCGA-AR-A251-10A-01D-A167-09
BRCA	TCGA-AR-A252	TCGA-AR-A252-01A-11D-A167-09	TCGA-AR-A252-10A-01D-A167-09
BRCA	TCGA-AR-A254	TCGA-AR-A254-01A-21D-A167-09	TCGA-AR-A254-10A-01D-A167-09
BRCA	TCGA-AR-A255	TCGA-AR-A255-01A-11D-A167-09	TCGA-AR-A255-10A-01D-A167-09
BRCA	TCGA-AR-A256	TCGA-AR-A256-01A-11D-A167-09	TCGA-AR-A256-10A-01D-A167-09
BRCA	TCGA-AR-A2LE	TCGA-AR-A2LE-01A-11D-A17W-09	TCGA-AR-A2LE-10A-01D-A17W-09
BRCA	TCGA-AR-A2LH	TCGA-AR-A2LH-01A-31D-A18P-09	TCGA-AR-A2LH-10A-01D-A18P-09
BRCA	TCGA-AR-A2LK	TCGA-AR-A2LK-01A-11D-A17W-09	TCGA-AR-A2LK-10A-01D-A17W-09
BRCA	TCGA-AR-A2LL	TCGA-AR-A2LL-01A-11D-A17W-09	TCGA-AR-A2LL-10A-01D-A17W-09
	TCGA-AR-A2LM	TCGA-AR-A2LM-01A-11D-A17W-09	TCGA-AR-A2LM-10A-01D-A17W-09
BRCA	TCGA-AR-A2LN	TCGA-AR-A2LN-01A-21D-A18P-09	TCGA-AR-A2LN-10A-01D-A18P-09
BRCA	TCGA-AR-A2LO	TCGA-AR-A2LO-01A-31D-A18P-09	TCGA-AR-A2LO-10A-01D-A18P-09
BRCA	TCGA-AR-A2LQ	TCGA-AR-A2LQ-01A-22D-A18P-09	TCGA-AR-A2LQ-10A-01D-A18P-09
BRCA	TCGA-AR-A2LR	TCGA-AR-A2LR-01A-12D-A18P-09	TCGA-AR-A2LR-10A-01D-A18P-09
BRCA	TCGA-AR-A5QM	TCGA-AR-A5QM-01A-11D-A27P-09	TCGA-AR-A5QM-10A-01D-A27P-09
BRCA	TCGA-AR-A5QN	TCGA-AR-A5QN-01A-12D-A28B-09	TCGA-AR-A5QN-10A-01D-A28E-09
BRCA	TCGA-AR-A5QP	TCGA-AR-A5QP-01A-11D-A28B-09	TCGA-AR-A5QP-10A-01D-A28E-09
BRCA	TCGA-AR-A5QQ	TCGA-AR-A5QQ-01A-11D-A28B-09	TCGA-AR-A5QQ-10A-01D-A28E-09
BRCA	TCGA-B6-A0I1	TCGA-B6-A0I1-01A-11D-A21Q-09	TCGA-B6-A0I1-10A-01D-A21Q-09
BRCA	TCGA-B6-A0I2	TCGA-B6-A0I2-01A-11W-A050-09	TCGA-B6-A0I2-10A-01W-A055-09
BRCA	TCGA-B6-A0I5	TCGA-B6-A0I5-01A-11W-A100-09	TCGA-B6-A0I5-10A-01W-A055-09
BRCA	TCGA-B6-A0I8	TCGA-B6-A0I8-01A-11W-A050-09	TCGA-B6-A0I8-10A-01W-A055-09
BRCA	TCGA-B6-A0I9	TCGA-B6-A0I9-01A-11W-A050-09	TCGA-B6-A0I9-10A-01W-A055-09
BRCA	TCGA-B6-A0IA	TCGA-B6-A0IA-01A-11W-A050-09	TCGA-B6-A0IA-10A-01W-A055-09
BRCA	TCGA-B6-A0IB	TCGA-B6-A0IB-01A-11W-A050-09	TCGA-B6-A0IB-10A-01W-A055-09
BRCA	TCGA-B6-A0IC	TCGA-B6-A0IC-01A-11W-A050-09	TCGA-B6-A0IC-10A-01W-A055-09
BRCA	TCGA-B6-A0IE	TCGA-B6-A0IE-01A-11W-A050-09	TCGA-B6-A0IE-10A-01W-A055-09
BRCA	TCGA-B6-A0IG	TCGA-B6-A0IG-01A-11W-A050-09	TCGA-B6-A0IG-10A-01W-A055-09
BRCA	TCGA-B6-A0IH	TCGA-B6-A0IH-01A-11D-A10Y-09	TCGA-B6-A0IH-10A-01D-A110-09
BRCA	TCGA-B6-A0IJ	TCGA-B6-A0IJ-01A-11W-A050-09	TCGA-B6-A0IJ-10A-01W-A055-09
BRCA	TCGA-B6-A0IK	TCGA-B6-A0IK-01A-12W-A071-09	TCGA-B6-A0IK-10A-01W-A071-09
BRCA	TCGA-B6-A0IM	TCGA-B6-A0IM-01A-11W-A050-09	TCGA-B6-A0IM-10A-01W-A055-09
BRCA	TCGA-B6-A0IN	TCGA-B6-A0IN-01A-11W-A050-09	TCGA-B6-A0IN-10A-01W-A055-09
BRCA	TCGA-B6-A0IO	TCGA-B6-A0IO-01A-11W-A050-09	TCGA-B6-A0IO-10A-01W-A055-09
BRCA	TCGA-B6-A0IP	TCGA-B6-A0IP-01A-11D-A045-09	TCGA-B6-A0IP-10A-01W-A055-09
BRCA	TCGA-B6-A0IQ	TCGA-B6-A0IQ-01A-11W-A050-09	TCGA-B6-A0IQ-10A-01W-A055-09
BRCA	TCGA-B6-A0RE	TCGA-B6-A0RE-01A-11W-A071-09	TCGA-B6-A0RE-10A-01W-A071-09
BRCA	TCGA-B6-A0RG	TCGA-B6-A0RG-01A-11W-A071-09	TCGA-B6-A0RG-10A-01W-A071-09
BRCA	TCGA-B6-A0RH	TCGA-B6-A0RH-01A-21D-A10Y-09	TCGA-B6-A0RH-10A-01D-A110-09
BRCA	TCGA-B6-A0RI	TCGA-B6-A0RI-01A-11W-A071-09	TCGA-B6-A0RI-10A-01W-A071-09
BRCA	TCGA-B6-A0RL	TCGA-B6-A0RL-01A-11D-A099-09	TCGA-B6-A0RL-10A-01D-A099-09
BRCA	TCGA-B6-A0RM	TCGA-B6-A0RM-01A-11D-A099-09	TCGA-B6-A0RM-10A-01D-A099-09
BRCA	TCGA-B6-A0RN	TCGA-B6-A0RN-01A-12D-A099-09	TCGA-B6-A0RN-10A-01D-A099-09
BRCA	TCGA-B6-A0RO	TCGA-B6-A0RO-01A-22D-A099-09	TCGA-B6-A0RO-10A-01D-A099-09
BRCA	TCGA-B6-A0RP	TCGA-B6-A0RP-01A-21D-A099-09	TCGA-B6-A0RP-10A-01D-A099-09
BRCA	TCGA-B6-A0RQ	TCGA-B6-A0RQ-01A-11D-A10Y-09	TCGA-B6-A0RQ-10A-01D-A110-09
BRCA	TCGA-B6-A0RS	TCGA-B6-A0RS-01A-11D-A099-09	TCGA-B6-A0RS-10A-01W-A097-09
BRCA	TCGA-B6-A0RT	TCGA-B6-A0RT-01A-21D-A099-09	TCGA-B6-A0RT-10A-01D-A099-09
BRCA	TCGA-B6-A0RU	TCGA-B6-A0RU-01A-11D-A099-09	TCGA-B6-A0RU-10A-01D-A099-09
BRCA	TCGA-B6-A0RV	TCGA-B6-A0RV-01A-11D-A099-09	TCGA-B6-A0RV-10A-01D-A099-09
BRCA	TCGA-B6-A0WS	TCGA-B6-A0WS-01A-11D-A10Y-09	TCGA-B6-A0WS-10A-01D-A110-09
BRCA	TCGA-B6-A0WT	TCGA-B6-A0WT-01A-11D-A10G-09	TCGA-B6-A0WT-10A-01D-A10G-09
BRCA	TCGA-B6-A0WV	TCGA-B6-A0WV-01A-11D-A10G-09	TCGA-B6-A0WV-10A-01D-A10G-09
BRCA	TCGA-B6-A0WW	TCGA-B6-A0WW-01A-11D-A10G-09	TCGA-B6-A0WW-10A-01D-A10G-09
BRCA	TCGA-B6-A0WX	TCGA-B6-A0WX-01A-11D-A10G-09	TCGA-B6-A0WX-10A-01D-A10G-09
BRCA	TCGA-B6-A0WY	TCGA-B6-A0WY-01A-11D-A10G-09	TCGA-B6-A0WY-10A-01D-A10G-09
BRCA	TCGA-B6-A0WZ	TCGA-B6-A0WZ-01A-11D-A10G-09	TCGA-B6-A0WZ-10A-01D-A10G-09
BRCA	TCGA-B6-A0X0	TCGA-B6-A0X0-01A-21D-A10Y-09	TCGA-B6-A0X0-10A-01D-A110-09
BRCA	TCGA-B6-A0X1	TCGA-B6-A0X1-01A-11D-A10G-09	TCGA-B6-A0X1-10A-01D-A117-09
BRCA	TCGA-B6-A0X4	TCGA-B6-A0X4-01A-11D-A10G-09	TCGA-B6-A0X4-10A-01D-A10G-09
BRCA	TCGA-B6-A0X5	TCGA-B6-A0X5-01A-21D-A10G-09	TCGA-B6-A0X5-10A-01D-A10G-09
BRCA	TCGA-B6-A0X7	TCGA-B6-A0X7-01A-11D-A10M-09	TCGA-B6-A0X7-10A-01D-A10M-09
BRCA	TCGA-B6-A1KC	TCGA-B6-A1KC-01B-11D-A159-09	TCGA-B6-A1KC-10A-01W-A14R-09
BRCA	TCGA-B6-A1KF	TCGA-B6-A1KF-01A-11D-A13L-09	TCGA-B6-A1KF-10A-01W-A14R-09
BRCA	TCGA-B6-A1KI	TCGA-B6-A1KI-01A-11D-A14K-09	TCGA-B6-A1KI-10A-01W-A16I-09
BRCA	TCGA-B6-A1KN	TCGA-B6-A1KN-01A-11D-A13L-09	TCGA-B6-A1KN-10A-01D-A188-09
BRCA	TCGA-B6-A2IU	TCGA-B6-A2IU-01A-32D-A19T-09	TCGA-B6-A2IU-10A-01D-A18P-09
BRCA	TCGA-B6-A401	TCGA-B6-A401-01A-11D-A23C-09	TCGA-B6-A401-10A-01D-A23C-09
BRCA	TCGA-B6-A409	TCGA-B6-A409-01A-11D-A243-09	TCGA-B6-A409-10A-01D-A243-09
BRCA	TCGA-B6-A40B	TCGA-B6-A40B-01A-11D-A23C-09	TCGA-B6-A40B-10A-01D-A23C-09
BRCA	TCGA-B6-A40C	TCGA-B6-A40C-01A-11D-A23C-09	TCGA-B6-A40C-10A-01D-A23C-09
BRCA	TCGA-BH-A0AU	TCGA-BH-A0AU-01A-11D-A12Q-09	TCGA-BH-A0AU-11A-11D-A12Q-09
BRCA	TCGA-BH-A0AV	TCGA-BH-A0AV-01A-31D-A10Y-09	TCGA-BH-A0AV-10A-01D-A110-09
BRCA	TCGA-BH-A0AW	TCGA-BH-A0AW-01A-11W-A071-09	TCGA-BH-A0AW-10A-01W-A071-09
BRCA	TCGA-BH-A0AY	TCGA-BH-A0AY-01A-21W-A019-09	TCGA-BH-A0AY-10A-01W-A021-09
BRCA	TCGA-BH-A0AZ	TCGA-BH-A0AZ-01A-21D-A12Q-09	TCGA-BH-A0AZ-11A-22D-A12Q-09
BRCA	TCGA-BH-A0B0	TCGA-BH-A0B0-01A-21D-A10Y-09	TCGA-BH-A0B0-10A-01D-A110-09
BRCA	TCGA-BH-A0B1	TCGA-BH-A0B1-01A-12W-A071-09	TCGA-BH-A0B1-10A-01W-A071-09
BRCA	TCGA-BH-A0B3	TCGA-BH-A0B3-01A-11W-A071-09	TCGA-BH-A0B3-10A-01W-A071-09
BRCA	TCGA-BH-A0B4	TCGA-BH-A0B4-01A-11W-A019-09	TCGA-BH-A0B4-10A-01W-A021-09
BRCA	TCGA-BH-A0B5	TCGA-BH-A0B5-01A-11D-A12Q-09	TCGA-BH-A0B5-11A-23W-A14O-09
BRCA	TCGA-BH-A0B6	TCGA-BH-A0B6-01A-11D-A19Y-09	TCGA-BH-A0B6-10A-01D-A19Y-09
BRCA	TCGA-BH-A0B7	TCGA-BH-A0B7-01A-12D-A10Y-09	TCGA-BH-A0B7-11A-34D-A10Y-09
BRCA	TCGA-BH-A0B8	TCGA-BH-A0B8-01A-21W-A071-09	TCGA-BH-A0B8-10A-01W-A071-09
BRCA	TCGA-BH-A0B9	TCGA-BH-A0B9-01A-11W-A071-09	TCGA-BH-A0B9-10A-01W-A071-09
BRCA	TCGA-BH-A0BA	TCGA-BH-A0BA-01A-11W-A071-09	TCGA-BH-A0BA-10A-01W-A071-09
BRCA	TCGA-BH-A0BC	TCGA-BH-A0BC-01A-22D-A099-09	TCGA-BH-A0BC-10A-01D-A099-09
BRCA	TCGA-BH-A0BD	TCGA-BH-A0BD-01A-11W-A050-09	TCGA-BH-A0BD-10A-01W-A055-09
BRCA	TCGA-BH-A0BF	TCGA-BH-A0BF-01A-21D-A12Q-09	TCGA-BH-A0BF-11A-31D-A12Q-09
BRCA	TCGA-BH-A0BG	TCGA-BH-A0BG-01A-11D-A10Y-09	TCGA-BH-A0BG-10A-01D-A110-09
BRCA	TCGA-BH-A0BJ	TCGA-BH-A0BJ-01A-11W-A071-09	TCGA-BH-A0BJ-10A-01W-A071-09
BRCA	TCGA-BH-A0BL	TCGA-BH-A0BL-01A-11D-A10Y-09	TCGA-BH-A0BL-10A-01D-A110-09
BRCA	TCGA-BH-A0BM	TCGA-BH-A0BM-01A-11W-A071-09	TCGA-BH-A0BM-10A-01W-A071-09
BRCA	TCGA-BH-A0BO	TCGA-BH-A0BO-01A-23D-A12B-09	TCGA-BH-A0BO-10A-01D-A12B-09
BRCA	TCGA-BH-A0BP	TCGA-BH-A0BP-01A-11D-A10Y-09	TCGA-BH-A0BP-10A-01D-A110-09
BRCA	TCGA-BH-A0BQ	TCGA-BH-A0BQ-01A-21D-A10Y-09	TCGA-BH-A0BQ-10A-01D-A110-09
BRCA	TCGA-BH-A0BR	TCGA-BH-A0BR-01A-21W-A12T-09	TCGA-BH-A0BR-10A-01D-A110-09
BRCA	TCGA-BH-A0BS	TCGA-BH-A0BS-01A-11D-A12Q-09	TCGA-BH-A0BS-11A-11D-A12Q-09
BRCA	TCGA-BH-A0BT	TCGA-BH-A0BT-01A-11D-A12Q-09	TCGA-BH-A0BT-11A-21D-A12Q-09
BRCA	TCGA-BH-A0BV	TCGA-BH-A0BV-01A-11W-A019-09	TCGA-BH-A0BV-10A-01W-A021-09
BRCA	TCGA-BH-A0BW	TCGA-BH-A0BW-01A-11D-A10Y-09	TCGA-BH-A0BW-10A-01D-A110-09
BRCA	TCGA-BH-A0BZ	TCGA-BH-A0BZ-01A-31D-A12Q-09	TCGA-BH-A0BZ-11A-61D-A12Q-09
BRCA	TCGA-BH-A0C0	TCGA-BH-A0C0-01A-21W-A071-09	TCGA-BH-A0C0-10A-01W-A071-09
BRCA	TCGA-BH-A0C1	TCGA-BH-A0C1-01B-11D-A12B-09	TCGA-BH-A0C1-10A-01D-A12B-09
BRCA	TCGA-BH-A0C3	TCGA-BH-A0C3-01A-21D-A12Q-09	TCGA-BH-A0C3-11A-23D-A12Q-09
BRCA	TCGA-BH-A0C7	TCGA-BH-A0C7-01B-11D-A10Y-09	TCGA-BH-A0C7-10A-01D-A110-09
BRCA	TCGA-BH-A0DD	TCGA-BH-A0DD-01A-31D-A12Q-09	TCGA-BH-A0DD-11A-23D-A12Q-09
BRCA	TCGA-BH-A0DE	TCGA-BH-A0DE-01A-11D-A10Y-09	TCGA-BH-A0DE-10A-02D-A110-09
BRCA	TCGA-BH-A0DG	TCGA-BH-A0DG-01A-21D-A12Q-09	TCGA-BH-A0DG-11A-43D-A12Q-09
BRCA	TCGA-BH-A0DH	TCGA-BH-A0DH-01A-11D-A099-09	TCGA-BH-A0DH-10A-01D-A099-09
BRCA	TCGA-BH-A0DI	TCGA-BH-A0DI-01A-21D-A12Q-09	TCGA-BH-A0DI-11A-32D-A12Q-09
BRCA	TCGA-BH-A0DK	TCGA-BH-A0DK-01A-21W-A071-09	TCGA-BH-A0DK-10A-01W-A071-09
BRCA	TCGA-BH-A0DL	TCGA-BH-A0DL-01A-11D-A10Y-09	TCGA-BH-A0DL-10A-01D-A110-09
BRCA	TCGA-BH-A0DO	TCGA-BH-A0DO-01B-11D-A12B-09	TCGA-BH-A0DO-11A-22D-A12B-09
BRCA	TCGA-BH-A0DP	TCGA-BH-A0DP-01A-21W-A071-09	TCGA-BH-A0DP-10A-01W-A071-09
BRCA	TCGA-BH-A0DQ	TCGA-BH-A0DQ-01A-11D-A099-09	TCGA-BH-A0DQ-10A-01D-A099-09
BRCA	TCGA-BH-A0DS	TCGA-BH-A0DS-01A-11W-A071-09	TCGA-BH-A0DS-10A-01W-A071-09
BRCA	TCGA-BH-A0DT	TCGA-BH-A0DT-01A-21D-A12B-09	TCGA-BH-A0DT-11A-12D-A12B-09
BRCA	TCGA-BH-A0DV	TCGA-BH-A0DV-01A-21D-A12Q-09	TCGA-BH-A0DV-11A-22D-A12Q-09
BRCA	TCGA-BH-A0DX	TCGA-BH-A0DX-01A-11D-A10Y-09	TCGA-BH-A0DX-10A-02D-A110-09
BRCA	TCGA-BH-A0DZ	TCGA-BH-A0DZ-01A-11W-A019-09	TCGA-BH-A0DZ-10A-01W-A021-09
BRCA	TCGA-BH-A0E0	TCGA-BH-A0E0-01A-11W-A071-09	TCGA-BH-A0E0-10A-01W-A071-09
BRCA	TCGA-BH-A0E1	TCGA-BH-A0E1-01A-11W-A071-09	TCGA-BH-A0E1-10A-01W-A071-09
BRCA	TCGA-BH-A0E2	TCGA-BH-A0E2-01A-11W-A071-09	TCGA-BH-A0E2-10A-01W-A071-09
BRCA	TCGA-BH-A0E6	TCGA-BH-A0E6-01A-11W-A050-09	TCGA-BH-A0E6-10A-01W-A055-09
BRCA	TCGA-BH-A0E7	TCGA-BH-A0E7-01A-11W-A050-09	TCGA-BH-A0E7-10A-01W-A055-09
BRCA	TCGA-BH-A0E9	TCGA-BH-A0E9-01B-11D-A10Y-09	TCGA-BH-A0E9-10A-01D-A110-09
BRCA	TCGA-BH-A0EA	TCGA-BH-A0EA-01A-11D-A10Y-09	TCGA-BH-A0EA-10A-01D-A110-09
BRCA	TCGA-BH-A0EB	TCGA-BH-A0EB-01A-11W-A050-09	TCGA-BH-A0EB-10A-01W-A055-09
BRCA	TCGA-BH-A0EE	TCGA-BH-A0EE-01A-11W-A050-09	TCGA-BH-A0EE-10A-01W-A055-09
BRCA	TCGA-BH-A0EI	TCGA-BH-A0EI-01A-11D-A10Y-09	TCGA-BH-A0EI-10A-01D-A110-09
BRCA	TCGA-BH-A0GY	TCGA-BH-A0GY-01A-11W-A071-09	TCGA-BH-A0GY-10A-01W-A071-09
BRCA	TCGA-BH-A0GZ	TCGA-BH-A0GZ-01A-11W-A071-09	TCGA-BH-A0GZ-10A-01W-A071-09
BRCA	TCGA-BH-A0H0	TCGA-BH-A0H0-01A-11W-A071-09	TCGA-BH-A0H0-10A-01W-A071-09
BRCA	TCGA-BH-A0H3	TCGA-BH-A0H3-01A-11D-A12Q-09	TCGA-BH-A0H3-11A-12D-A12Q-09
BRCA	TCGA-BH-A0H5	TCGA-BH-A0H5-01A-21D-A10Y-09	TCGA-BH-A0H5-10A-01D-A110-09
BRCA	TCGA-BH-A0H6	TCGA-BH-A0H6-01A-21W-A071-09	TCGA-BH-A0H6-10A-01W-A071-09
BRCA	TCGA-BH-A0H7	TCGA-BH-A0H7-01A-13W-A071-09	TCGA-BH-A0H7-10A-01W-A071-09
BRCA	TCGA-BH-A0H9	TCGA-BH-A0H9-01A-11W-A071-09	TCGA-BH-A0H9-10A-01W-A071-09
BRCA	TCGA-BH-A0HA	TCGA-BH-A0HA-01A-11D-A12Q-09	TCGA-BH-A0HA-11A-31D-A12Q-09
BRCA	TCGA-BH-A0HB	TCGA-BH-A0HB-01A-11W-A071-09	TCGA-BH-A0HB-10A-01W-A071-09
BRCA	TCGA-BH-A0HF	TCGA-BH-A0HF-01A-11W-A071-09	TCGA-BH-A0HF-10A-01W-A071-09
BRCA	TCGA-BH-A0HI	TCGA-BH-A0HI-01A-11D-A099-09	TCGA-BH-A0HI-10A-01D-A099-09
BRCA	TCGA-BH-A0HK	TCGA-BH-A0HK-01A-11W-A071-09	TCGA-BH-A0HK-10A-01W-A071-09
BRCA	TCGA-BH-A0HL	TCGA-BH-A0HL-01A-11W-A050-09	TCGA-BH-A0HL-10A-11W-A055-09
BRCA	TCGA-BH-A0HN	TCGA-BH-A0HN-01A-11D-A099-09	TCGA-BH-A0HN-10A-01D-A099-09
BRCA	TCGA-BH-A0HO	TCGA-BH-A0HO-01A-11W-A050-09	TCGA-BH-A0HO-10A-01W-A055-09
BRCA	TCGA-BH-A0HP	TCGA-BH-A0HP-01A-12D-A099-09	TCGA-BH-A0HP-10A-01D-A099-09
BRCA	TCGA-BH-A0HQ	TCGA-BH-A0HQ-01A-11W-A050-09	TCGA-BH-A0HQ-10A-01W-A055-09
BRCA	TCGA-BH-A0HU	TCGA-BH-A0HU-01A-11W-A050-09	TCGA-BH-A0HU-10A-01W-A055-09
BRCA	TCGA-BH-A0HW	TCGA-BH-A0HW-01A-11W-A050-09	TCGA-BH-A0HW-10A-01W-A055-09
BRCA	TCGA-BH-A0HX	TCGA-BH-A0HX-01A-21W-A071-09	TCGA-BH-A0HX-10A-02W-A071-09
BRCA	TCGA-BH-A0HY	TCGA-BH-A0HY-01A-11W-A071-09	TCGA-BH-A0HY-10A-02W-A071-09
BRCA	TCGA-BH-A0RX	TCGA-BH-A0RX-01A-21D-A099-09	TCGA-BH-A0RX-10A-01D-A099-09
BRCA	TCGA-BH-A0W3	TCGA-BH-A0W3-01A-11D-A10G-09	TCGA-BH-A0W3-10A-01X-A10H-09
BRCA	TCGA-BH-A0W4	TCGA-BH-A0W4-01A-11D-A10G-09	TCGA-BH-A0W4-10A-01D-A10G-09
	TCGA-BH-A0W5	TCGA-BH-A0W5-01A-11D-A10G-09	TCGA-BH-A0W5-10A-01D-A117-09
BRCA	TCGA-BH-A0W7	TCGA-BH-A0W7-01A-11D-A10Y-09	TCGA-BH-A0W7-10A-01D-A110-09									TCGA-BH-A0W5
BRCA	TCGA-BH-A0WA	TCGA-BH-A0WA-01A-11D-A10G-09	TCGA-BH-A0WA-10A-01D-A117-09
BRCA	TCGA-BH-A18F	TCGA-BH-A18F-01A-11D-A12B-09	TCGA-BH-A18F-11A-22D-A12B-09
BRCA	TCGA-BH-A18G	TCGA-BH-A18G-01A-11D-A12B-09	TCGA-BH-A18G-10A-01D-A12B-09
BRCA	TCGA-BH-A18H	TCGA-BH-A18H-01A-11D-A12B-09	TCGA-BH-A18H-10A-01D-A12B-09
BRCA	TCGA-BH-A18I	TCGA-BH-A18I-01A-11D-A12B-09	TCGA-BH-A18I-10A-01D-A12B-09
BRCA	TCGA-BH-A18J	TCGA-BH-A18J-01A-11D-A12B-09	TCGA-BH-A18J-11A-31D-A12B-09
BRCA	TCGA-BH-A18K	TCGA-BH-A18K-01A-11D-A12B-09	TCGA-BH-A18K-11A-13D-A12B-09
BRCA	TCGA-BH-A18L	TCGA-BH-A18L-01A-32D-A12B-09	TCGA-BH-A18L-11A-42D-A12B-09
BRCA	TCGA-BH-A18M	TCGA-BH-A18M-01A-11D-A12B-09	TCGA-BH-A18M-11A-33D-A12B-09
BRCA	TCGA-BH-A18N	TCGA-BH-A18N-01A-11D-A12B-09	TCGA-BH-A18N-11A-43D-A12B-09
BRCA	TCGA-BH-A18P	TCGA-BH-A18P-01A-11D-A12B-09	TCGA-BH-A18P-11A-43D-A12B-09
BRCA	TCGA-BH-A18Q	TCGA-BH-A18Q-01A-12D-A12B-09	TCGA-BH-A18Q-11A-34D-A12B-09
BRCA	TCGA-BH-A18R	TCGA-BH-A18R-01A-11D-A12B-09	TCGA-BH-A18R-11A-42D-A12B-09
BRCA	TCGA-BH-A18S	TCGA-BH-A18S-01A-11D-A12B-09	TCGA-BH-A18S-11A-43D-A12B-09
BRCA	TCGA-BH-A18T	TCGA-BH-A18T-01A-11D-A12B-09	TCGA-BH-A18T-11A-42D-A12B-09
BRCA	TCGA-BH-A18U	TCGA-BH-A18U-01A-21D-A12B-09	TCGA-BH-A18U-11A-23D-A12B-09
BRCA	TCGA-BH-A18V	TCGA-BH-A18V-01A-11D-A12B-09	TCGA-BH-A18V-11A-52D-A12B-09
BRCA	TCGA-BH-A1EN	TCGA-BH-A1EN-01A-11D-A17G-09	TCGA-BH-A1EN-11A-23W-A14R-09
BRCA	TCGA-BH-A1EO	TCGA-BH-A1EO-01A-11D-A135-09	TCGA-BH-A1EO-11A-31D-A135-09
BRCA	TCGA-BH-A1ET	TCGA-BH-A1ET-01A-11D-A135-09	TCGA-BH-A1ET-11B-23D-A135-09
BRCA	TCGA-BH-A1EU	TCGA-BH-A1EU-01A-11D-A135-09	TCGA-BH-A1EU-11A-23D-A135-09
BRCA	TCGA-BH-A1EV	TCGA-BH-A1EV-01A-11D-A135-09	TCGA-BH-A1EV-11A-24D-A135-09
BRCA	TCGA-BH-A1EW	TCGA-BH-A1EW-01A-11D-A135-09	TCGA-BH-A1EW-11B-33D-A135-09
BRCA	TCGA-BH-A1EX	TCGA-BH-A1EX-01A-11D-A13L-09	TCGA-BH-A1EX-11A-21D-A13O-09
BRCA	TCGA-BH-A1EY	TCGA-BH-A1EY-01A-11D-A13L-09	TCGA-BH-A1EY-11B-21D-A188-09
BRCA	TCGA-BH-A1F0	TCGA-BH-A1F0-01A-11D-A135-09	TCGA-BH-A1F0-11B-23D-A135-09
BRCA	TCGA-BH-A1F2	TCGA-BH-A1F2-01A-31D-A13L-09	TCGA-BH-A1F2-11A-32D-A188-09
BRCA	TCGA-BH-A1F5	TCGA-BH-A1F5-01A-12D-A13L-09	TCGA-BH-A1F5-11A-43D-A13O-09
BRCA	TCGA-BH-A1F6	TCGA-BH-A1F6-01A-11D-A13L-09	TCGA-BH-A1F6-11B-94D-A13O-09
BRCA	TCGA-BH-A1F8	TCGA-BH-A1F8-01A-11D-A13L-09	TCGA-BH-A1F8-11B-21D-A188-09
BRCA	TCGA-BH-A1FC	TCGA-BH-A1FC-01A-11D-A13L-09	TCGA-BH-A1FC-11A-32D-A188-09
BRCA	TCGA-BH-A1FD	TCGA-BH-A1FD-01A-11W-A14Q-09	TCGA-BH-A1FD-11B-21D-A13O-09
BRCA		TCGA-BH-A1FE-01A-11D-A13L-09	TCGA-BH-A1FE-11B-14D-A13O-09
BRCA	TCGA-BH-A1FG	TCGA-BH-A1FG-01A-11D-A13L-09	TCGA-BH-A1FG-11B-12D-A13O-09
BRCA	TCGA-BH-A1FH	TCGA-BH-A1FH-01A-12D-A13L-09	TCGA-BH-A1FH-11B-42D-A13O-09
BRCA	TCGA-BH-A1FJ	TCGA-BH-A1FJ-01A-11D-A13L-09	TCGA-BH-A1FJ-11B-42D-A188-09
BRCA	TCGA-BH-A1FL	TCGA-BH-A1FL-01A-11D-A13L-09	TCGA-BH-A1FL-11A-13D-A13O-09
BRCA	TCGA-BH-A1FM	TCGA-BH-A1FM-01A-11D-A13L-09	TCGA-BH-A1FM-11B-23D-A188-09
BRCA	TCGA-BH-A1FN	TCGA-BH-A1FN-01A-11D-A13L-09	TCGA-BH-A1FN-11A-34D-A13O-09
BRCA	TCGA-BH-A1FR	TCGA-BH-A1FR-01A-11D-A13L-09	TCGA-BH-A1FR-11B-42D-A13O-09
BRCA	TCGA-BH-A1FU	TCGA-BH-A1FU-01A-11D-A14G-09	TCGA-BH-A1FU-11A-23D-A14G-09
BRCA	TCGA-BH-A201	TCGA-BH-A201-01A-11D-A14K-09	TCGA-BH-A201-10A-01D-A14K-09
BRCA	TCGA-BH-A202	TCGA-BH-A202-01A-11D-A14K-09	TCGA-BH-A202-10A-01D-A14K-09
BRCA	TCGA-BH-A203	TCGA-BH-A203-01A-12D-A167-09	TCGA-BH-A203-11A-42D-A167-09
BRCA	TCGA-BH-A204	TCGA-BH-A204-01A-11D-A159-09	TCGA-BH-A204-11A-53D-A159-09
BRCA	TCGA-BH-A208	TCGA-BH-A208-01A-11D-A159-09	TCGA-BH-A208-11A-51D-A159-09
BRCA	TCGA-BH-A209	TCGA-BH-A209-01A-11D-A17G-09	TCGA-BH-A209-11A-42D-A17G-09
BRCA	TCGA-BH-A28Q	TCGA-BH-A28Q-01A-11D-A16D-09	TCGA-BH-A28Q-10A-01D-A16D-09
BRCA	TCGA-BH-A2L8	TCGA-BH-A2L8-01A-11D-A18P-09	TCGA-BH-A2L8-10A-01D-A18P-09
BRCA	TCGA-BH-A42U	TCGA-BH-A42U-01A-12D-A243-09	TCGA-BH-A42U-10A-01D-A243-09
BRCA	TCGA-BH-A42V	TCGA-BH-A42V-01A-11D-A243-09	TCGA-BH-A42V-10A-01D-A243-09
BRCA	TCGA-BH-A5IZ	TCGA-BH-A5IZ-01A-11D-A27P-09	TCGA-BH-A5IZ-10A-01D-A27P-09
BRCA	TCGA-BH-A5J0	TCGA-BH-A5J0-01A-11D-A27P-09	TCGA-BH-A5J0-10A-01D-A27P-09
BRCA	TCGA-BH-A6R8	TCGA-BH-A6R8-01A-21D-A33E-09	TCGA-BH-A6R8-10A-01D-A33H-09
BRCA	TCGA-BH-A6R9	TCGA-BH-A6R9-01A-21D-A32I-09	TCGA-BH-A6R9-10A-01D-A32I-09
BRCA	TCGA-BH-A8FY	TCGA-BH-A8FY-01A-11D-A36J-09	TCGA-BH-A8FY-10A-01D-A36M-09
BRCA	TCGA-BH-A8FZ	TCGA-BH-A8FZ-01A-11D-A351-09	TCGA-BH-A8FZ-10A-01D-A351-09
BRCA	TCGA-BH-A8G0	TCGA-BH-A8G0-01A-11D-A351-09	TCGA-BH-A8G0-10A-01D-A351-09
BRCA	TCGA-BH-AB28	TCGA-BH-AB28-01A-31D-A41F-09	TCGA-BH-AB28-10A-01D-A41F-09
BRCA	TCGA-C8-A12K	TCGA-C8-A12K-01A-21D-A10Y-09	TCGA-C8-A12K-10A-01D-A110-09
BRCA	TCGA-C8-A12L	TCGA-C8-A12L-01A-11D-A10Y-09	TCGA-C8-A12L-10A-01D-A110-09
BRCA	TCGA-C8-A12M	TCGA-C8-A12M-01A-11D-A135-09	TCGA-C8-A12M-10A-01D-A110-09
BRCA	TCGA-C8-A12N	TCGA-C8-A12N-01A-11D-A10Y-09	TCGA-C8-A12N-10A-01D-A110-09
BRCA	TCGA-C8-A12O	TCGA-C8-A12O-01A-11D-A10Y-09	TCGA-C8-A12O-10A-01D-A110-09
BRCA	TCGA-C8-A12P	TCGA-C8-A12P-01A-11D-A10Y-09	TCGA-C8-A12P-10A-01D-A110-09
BRCA	TCGA-C8-A12Q	TCGA-C8-A12Q-01A-11D-A10Y-09	TCGA-C8-A12Q-10A-01D-A110-09
BRCA	TCGA-C8-A12T	TCGA-C8-A12T-01A-11D-A10Y-09	TCGA-C8-A12T-10A-01D-A110-09
BRCA	TCGA-C8-A12U	TCGA-C8-A12U-01A-11D-A10Y-09	TCGA-C8-A12U-10A-01D-A110-09
BRCA	TCGA-C8-A12V	TCGA-C8-A12V-01A-11D-A10Y-09	TCGA-C8-A12V-10A-01D-A110-09
BRCA	TCGA-C8-A12W	TCGA-C8-A12W-01A-11D-A10Y-09	TCGA-C8-A12W-10A-01D-A110-09
BRCA	TCGA-C8-A12X	TCGA-C8-A12X-01A-11D-A10Y-09	TCGA-C8-A12X-10A-01D-A110-09
BRCA	TCGA-C8-A12Y	TCGA-C8-A12Y-01A-11D-A12B-09	TCGA-C8-A12Y-10A-01D-A12B-09
BRCA	TCGA-C8-A12Z	TCGA-C8-A12Z-01A-11D-A10Y-09	TCGA-C8-A12Z-10A-01D-A110-09
BRCA	TCGA-C8-A130	TCGA-C8-A130-01A-31D-A10Y-09	TCGA-C8-A130-10A-01D-A110-09
BRCA	TCGA-C8-A131	TCGA-C8-A131-01A-11D-A10Y-09	TCGA-C8-A131-10A-01D-A110-09
BRCA	TCGA-C8-A132	TCGA-C8-A132-01A-31D-A10Y-09	TCGA-C8-A132-10A-01D-A110-09
BRCA	TCGA-C8-A133	TCGA-C8-A133-01A-32D-A12B-09	TCGA-C8-A133-10A-01D-A12B-09
BRCA	TCGA-C8-A134	TCGA-C8-A134-01A-11D-A10Y-09	TCGA-C8-A134-10A-01D-A110-09
BRCA	TCGA-C8-A135	TCGA-C8-A135-01A-11D-A10Y-09	TCGA-C8-A135-10A-02D-A110-09
BRCA	TCGA-C8-A137	TCGA-C8-A137-01A-11D-A10Y-09	TCGA-C8-A137-10A-02D-A110-09
BRCA	TCGA-C8-A138	TCGA-C8-A138-01A-11D-A10Y-09	TCGA-C8-A138-10A-01D-A110-09
BRCA	TCGA-C8-A1HE	TCGA-C8-A1HE-01A-11D-A188-09	TCGA-C8-A1HE-10A-01D-A13O-09
BRCA	TCGA-C8-A1HF	TCGA-C8-A1HF-01A-11D-A135-09	TCGA-C8-A1HF-10A-01D-A135-09
BRCA	TCGA-C8-A1HG	TCGA-C8-A1HG-01A-11D-A135-09	TCGA-C8-A1HG-10A-01D-A135-09
BRCA	TCGA-C8-A1HI	TCGA-C8-A1HI-01A-11D-A135-09	TCGA-C8-A1HI-10A-01D-A135-09
BRCA	TCGA-C8-A1HJ	TCGA-C8-A1HJ-01A-11D-A13L-09	TCGA-C8-A1HJ-10A-01D-A13O-09
BRCA	TCGA-C8-A1HK	TCGA-C8-A1HK-01A-21D-A13L-09	TCGA-C8-A1HK-10A-01D-A13O-09
BRCA	TCGA-C8-A1HL	TCGA-C8-A1HL-01A-11D-A135-09	TCGA-C8-A1HL-10A-01D-A135-09
BRCA	TCGA-C8-A1HM	TCGA-C8-A1HM-01A-12D-A135-09	TCGA-C8-A1HM-10A-01D-A135-09
BRCA	TCGA-C8-A1HN	TCGA-C8-A1HN-01A-11D-A135-09	TCGA-C8-A1HN-10A-01D-A135-09
BRCA	TCGA-C8-A1HO	TCGA-C8-A1HO-01A-11D-A13L-09	TCGA-C8-A1HO-10A-01D-A188-09
BRCA	TCGA-C8-A26V	TCGA-C8-A26V-01A-11D-A16D-09	TCGA-C8-A26V-10A-01D-A16D-09
BRCA	TCGA-C8-A26W	TCGA-C8-A26W-01A-11D-A16D-09	TCGA-C8-A26W-10A-01D-A16D-09
BRCA	TCGA-C8-A26X	TCGA-C8-A26X-01A-31D-A16D-09	TCGA-C8-A26X-10A-01D-A16D-09
BRCA	TCGA-C8-A26Y	TCGA-C8-A26Y-01A-11D-A16D-09	TCGA-C8-A26Y-10A-01D-A16D-09						TCGA-C8-A273
BRCA	TCGA-C8-A26Z	TCGA-C8-A26Z-01A-11D-A16D-09	TCGA-C8-A26Z-10A-01D-A16D-09
	TCGA-C8-A273	TCGA-C8-A273-01A-11D-A16D-09	TCGA-C8-A273-10A-01D-A16D-09
BRCA	TCGA-C8-A274	TCGA-C8-A274-01A-11D-A16D-09	TCGA-C8-A274-10A-01D-A16D-09
BRCA	TCGA-C8-A275	TCGA-C8-A275-01A-21D-A16D-09	TCGA-C8-A275-10A-01D-A16D-09
BRCA	TCGA-C8-A278	TCGA-C8-A278-01A-11D-A167-09	TCGA-C8-A278-10A-01D-A167-09
BRCA	TCGA-C8-A27A	TCGA-C8-A27A-01A-11D-A167-09	TCGA-C8-A27A-10B-01D-A167-09
BRCA	TCGA-C8-A27B	TCGA-C8-A27B-01A-11D-A167-09	TCGA-C8-A27B-10A-01D-A167-09
BRCA	TCGA-C8-A3M7	TCGA-C8-A3M7-01A-12D-A21Q-09	TCGA-C8-A3M7-10A-01D-A21Q-09
BRCA	TCGA-C8-A3M8	TCGA-C8-A3M8-01A-11D-A20S-09	TCGA-C8-A3M8-10A-01D-A20S-09
BRCA	TCGA-C8-A8HP	TCGA-C8-A8HP-01A-11D-A36J-09	TCGA-C8-A8HP-10A-01D-A36M-09
BRCA	TCGA-C8-A8HQ	TCGA-C8-A8HQ-01A-11D-A36J-09	TCGA-C8-A8HQ-10A-01D-A36M-09
BRCA	TCGA-C8-A8HR	TCGA-C8-A8HR-01A-11D-A36J-09	TCGA-C8-A8HR-10A-01D-A36M-09
BRCA	TCGA-C8-A9FZ	TCGA-C8-A9FZ-01A-11D-A41F-09	TCGA-C8-A9FZ-10A-01D-A41F-09
BRCA	TCGA-D8-A13Y	TCGA-D8-A13Y-01A-11D-A10Y-09	TCGA-D8-A13Y-10A-01D-A110-09
BRCA	TCGA-D8-A13Z	TCGA-D8-A13Z-01A-11D-A10Y-09	TCGA-D8-A13Z-10A-01D-A110-09
BRCA	TCGA-D8-A140	TCGA-D8-A140-01A-11D-A10Y-09	TCGA-D8-A140-10A-01D-A110-09
BRCA	TCGA-D8-A141	TCGA-D8-A141-01A-11D-A10Y-09	TCGA-D8-A141-10A-01D-A110-09
BRCA	TCGA-D8-A142	TCGA-D8-A142-01A-11D-A10Y-09	TCGA-D8-A142-10A-01D-A110-09
BRCA	TCGA-D8-A143	TCGA-D8-A143-01A-11D-A10Y-09	TCGA-D8-A143-10A-01D-A110-09
BRCA	TCGA-D8-A145	TCGA-D8-A145-01A-11D-A10Y-09	TCGA-D8-A145-10A-01D-A110-09
BRCA	TCGA-D8-A146	TCGA-D8-A146-01A-31D-A10Y-09	TCGA-D8-A146-10A-01D-A110-09
BRCA	TCGA-D8-A147	TCGA-D8-A147-01A-11D-A10Y-09	TCGA-D8-A147-10A-01D-A110-09
BRCA	TCGA-D8-A1J8	TCGA-D8-A1J8-01A-11D-A13L-09	TCGA-D8-A1J8-10A-01D-A13O-09
BRCA	TCGA-D8-A1J9	TCGA-D8-A1J9-01A-11D-A13L-09	TCGA-D8-A1J9-10A-01D-A13O-09
BRCA	TCGA-D8-A1JA	TCGA-D8-A1JA-01A-11D-A13L-09	TCGA-D8-A1JA-10A-01W-A14R-09
BRCA	TCGA-D8-A1JB	TCGA-D8-A1JB-01A-11D-A13L-09	TCGA-D8-A1JB-10A-01D-A13O-09
	TCGA-D8-A1JC	TCGA-D8-A1JC-01A-11D-A13L-09	TCGA-D8-A1JC-10A-01D-A13O-09
BRCA	TCGA-D8-A1JD	TCGA-D8-A1JD-01A-11D-A13L-09	TCGA-D8-A1JD-10A-01D-A13O-09
BRCA	TCGA-D8-A1JE	TCGA-D8-A1JE-01A-11D-A13L-09	TCGA-D8-A1JE-10A-01D-A188-09
BRCA	TCGA-D8-A1JF	TCGA-D8-A1JF-01A-11D-A13L-09	TCGA-D8-A1JF-10A-01D-A17G-09
BRCA	TCGA-D8-A1JG	TCGA-D8-A1JG-01B-11D-A13L-09	TCGA-D8-A1JG-10A-01D-A13O-09
BRCA	TCGA-D8-A1JH	TCGA-D8-A1JH-01A-11D-A188-09	TCGA-D8-A1JH-10A-01D-A13O-09
BRCA	TCGA-D8-A1JI	TCGA-D8-A1JI-01A-11D-A13L-09	TCGA-D8-A1JI-10A-01D-A13O-09
BRCA	TCGA-D8-A1JJ	TCGA-D8-A1JJ-01A-31D-A14K-09	TCGA-D8-A1JJ-10A-01D-A14K-09
BRCA	TCGA-D8-A1JK	TCGA-D8-A1JK-01A-11D-A13L-09	TCGA-D8-A1JK-10A-01D-A13O-09
BRCA	TCGA-D8-A1JL	TCGA-D8-A1JL-01A-11D-A13L-09	TCGA-D8-A1JL-10A-01D-A188-09
BRCA	TCGA-D8-A1JM	TCGA-D8-A1JM-01A-11D-A13L-09	TCGA-D8-A1JM-10A-01D-A188-09
BRCA	TCGA-D8-A1JN	TCGA-D8-A1JN-01A-11D-A13L-09	TCGA-D8-A1JN-10A-01D-A13O-09
BRCA	TCGA-D8-A1JP	TCGA-D8-A1JP-01A-11D-A13L-09	TCGA-D8-A1JP-10A-01D-A13O-09
BRCA	TCGA-D8-A1JS	TCGA-D8-A1JS-01A-11D-A13L-09	TCGA-D8-A1JS-10A-01D-A13O-09
BRCA	TCGA-D8-A1JT	TCGA-D8-A1JT-01A-31D-A13L-09	TCGA-D8-A1JT-10A-01D-A13O-09
BRCA	TCGA-D8-A1JU	TCGA-D8-A1JU-01A-11D-A13L-09	TCGA-D8-A1JU-10A-01D-A188-09
BRCA	TCGA-D8-A1X5	TCGA-D8-A1X5-01A-11D-A14G-09	TCGA-D8-A1X5-10A-01D-A14G-09
BRCA	TCGA-D8-A1X6	TCGA-D8-A1X6-01A-11D-A14K-09	TCGA-D8-A1X6-10A-01D-A14K-09
BRCA	TCGA-D8-A1X7	TCGA-D8-A1X7-01A-11D-A14K-09	TCGA-D8-A1X7-10A-01D-A14K-09
BRCA	TCGA-D8-A1X8	TCGA-D8-A1X8-01A-11D-A14K-09	TCGA-D8-A1X8-10A-01W-A16I-09
BRCA	TCGA-D8-A1X9	TCGA-D8-A1X9-01A-12D-A159-09	TCGA-D8-A1X9-10A-01D-A17G-09
BRCA	TCGA-D8-A1XA	TCGA-D8-A1XA-01A-11D-A14G-09	TCGA-D8-A1XA-10A-01D-A14G-09
BRCA	TCGA-D8-A1XB	TCGA-D8-A1XB-01A-11D-A14G-09	TCGA-D8-A1XB-10A-01D-A14G-09
BRCA	TCGA-D8-A1XC	TCGA-D8-A1XC-01A-11D-A14G-09	TCGA-D8-A1XC-10A-01D-A14G-09
BRCA	TCGA-D8-A1XF	TCGA-D8-A1XF-01A-11D-A14G-09	TCGA-D8-A1XF-10A-01D-A14G-09
BRCA	TCGA-D8-A1XG	TCGA-D8-A1XG-01A-11D-A14G-09	TCGA-D8-A1XG-10A-01D-A14G-09
BRCA	TCGA-D8-A1XJ	TCGA-D8-A1XJ-01A-11D-A14K-09	TCGA-D8-A1XJ-10A-01W-A16I-09
BRCA	TCGA-D8-A1XK	TCGA-D8-A1XK-01A-21D-A14K-09	TCGA-D8-A1XK-10A-01D-A14K-09
BRCA	TCGA-D8-A1XL	TCGA-D8-A1XL-01A-11D-A14K-09	TCGA-D8-A1XL-10A-01D-A14K-09
BRCA	TCGA-D8-A1XM	TCGA-D8-A1XM-01A-21D-A14K-09	TCGA-D8-A1XM-10A-01D-A14K-09
BRCA	TCGA-D8-A1XO	TCGA-D8-A1XO-01A-11D-A14K-09	TCGA-D8-A1XO-10A-01D-A14K-09
BRCA	TCGA-D8-A1XQ	TCGA-D8-A1XQ-01A-11D-A14K-09	TCGA-D8-A1XQ-10A-01D-A14K-09
BRCA	TCGA-D8-A1XR	TCGA-D8-A1XR-01A-11D-A14K-09	TCGA-D8-A1XR-10A-01D-A14K-09
BRCA	TCGA-D8-A1XS	TCGA-D8-A1XS-01A-11D-A14K-09	TCGA-D8-A1XS-10A-01D-A14K-09
BRCA	TCGA-D8-A1XT	TCGA-D8-A1XT-01A-11D-A14K-09	TCGA-D8-A1XT-10A-01D-A14K-09
BRCA	TCGA-D8-A1XU	TCGA-D8-A1XU-01A-11D-A14K-09	TCGA-D8-A1XU-10A-01D-A14K-09
BRCA	TCGA-D8-A1XV	TCGA-D8-A1XV-01A-11D-A14K-09	TCGA-D8-A1XV-10A-01D-A14K-09
BRCA	TCGA-D8-A1XW	TCGA-D8-A1XW-01A-11D-A14K-09	TCGA-D8-A1XW-10A-01D-A14K-09
BRCA	TCGA-D8-A1XY	TCGA-D8-A1XY-01A-11D-A14K-09	TCGA-D8-A1XY-10A-01D-A14K-09
BRCA	TCGA-D8-A1XZ	TCGA-D8-A1XZ-01A-11D-A14K-09	TCGA-D8-A1XZ-10A-01D-A14K-09
BRCA	TCGA-D8-A1Y0	TCGA-D8-A1Y0-01A-11D-A14K-09	TCGA-D8-A1Y0-10A-01D-A14K-09
BRCA	TCGA-D8-A1Y1	TCGA-D8-A1Y1-01A-21D-A14K-09	TCGA-D8-A1Y1-10A-01D-A14K-09
BRCA	TCGA-D8-A1Y2	TCGA-D8-A1Y2-01A-11D-A159-09	TCGA-D8-A1Y2-10A-01D-A159-09
BRCA	TCGA-D8-A1Y3	TCGA-D8-A1Y3-01A-11D-A159-09	TCGA-D8-A1Y3-10A-01D-A159-09
BRCA	TCGA-D8-A27E	TCGA-D8-A27E-01A-11D-A16D-09	TCGA-D8-A27E-10A-01D-A16D-09
BRCA	TCGA-D8-A27F	TCGA-D8-A27F-01A-11D-A16D-09	TCGA-D8-A27F-10A-01D-A16D-09
BRCA	TCGA-D8-A27G	TCGA-D8-A27G-01A-11D-A16D-09	TCGA-D8-A27G-10A-01D-A16D-09
BRCA	TCGA-D8-A27H	TCGA-D8-A27H-01A-11D-A16D-09	TCGA-D8-A27H-10A-01D-A16D-09
BRCA	TCGA-D8-A27I	TCGA-D8-A27I-01A-11D-A16D-09	TCGA-D8-A27I-10A-02D-A16D-09
BRCA	TCGA-D8-A27K	TCGA-D8-A27K-01A-11D-A16D-09	TCGA-D8-A27K-10A-01D-A16D-09
BRCA	TCGA-D8-A27L	TCGA-D8-A27L-01A-11D-A16D-09	TCGA-D8-A27L-10A-01D-A16D-09
BRCA	TCGA-D8-A27M	TCGA-D8-A27M-01A-11D-A16D-09	TCGA-D8-A27M-10A-01D-A16D-09
BRCA	TCGA-D8-A27N	TCGA-D8-A27N-01A-11D-A16D-09	TCGA-D8-A27N-10A-01D-A16D-09
BRCA	TCGA-D8-A27P	TCGA-D8-A27P-01A-11D-A16D-09	TCGA-D8-A27P-10A-01D-A16D-09
BRCA	TCGA-D8-A27R	TCGA-D8-A27R-01A-11D-A16D-09	TCGA-D8-A27R-10A-01D-A16D-09
BRCA	TCGA-D8-A27T	TCGA-D8-A27T-01A-11D-A16D-09	TCGA-D8-A27T-10A-01D-A16D-09
BRCA	TCGA-D8-A27V	TCGA-D8-A27V-01A-12D-A17D-09	TCGA-D8-A27V-10A-01D-A17D-09
BRCA	TCGA-D8-A27W	TCGA-D8-A27W-01A-11D-A16D-09	TCGA-D8-A27W-10A-01D-A16D-09
BRCA	TCGA-D8-A3Z6	TCGA-D8-A3Z6-01A-11D-A23C-09	TCGA-D8-A3Z6-10A-01D-A23C-09
BRCA	TCGA-D8-A4Z1	TCGA-D8-A4Z1-01A-21D-A25Q-09	TCGA-D8-A4Z1-10A-01D-A25Q-09
BRCA	TCGA-D8-A73U	TCGA-D8-A73U-01A-11D-A33E-09	TCGA-D8-A73U-10A-21D-A33H-09
BRCA	TCGA-D8-A73W	TCGA-D8-A73W-01A-22D-A351-09	TCGA-D8-A73W-10A-21D-A351-09
BRCA	TCGA-D8-A73X	TCGA-D8-A73X-01A-11D-A32I-09	TCGA-D8-A73X-10A-21D-A32I-09
BRCA	TCGA-E2-A105	TCGA-E2-A105-01A-11D-A10M-09	TCGA-E2-A105-10A-01D-A10M-09
BRCA	TCGA-E2-A107	TCGA-E2-A107-01A-11D-A10M-09	TCGA-E2-A107-10A-01D-A10M-09
BRCA	TCGA-E2-A108	TCGA-E2-A108-01A-13D-A10M-09	TCGA-E2-A108-10A-01D-A10M-09
BRCA	TCGA-E2-A109	TCGA-E2-A109-01A-11D-A10M-09	TCGA-E2-A109-10A-01D-A10M-09
BRCA	TCGA-E2-A10A	TCGA-E2-A10A-01A-21D-A10Y-09	TCGA-E2-A10A-10A-01D-A110-09
BRCA	TCGA-E2-A10B	TCGA-E2-A10B-01A-11D-A10M-09	TCGA-E2-A10B-10A-01D-A10M-09
BRCA	TCGA-E2-A10C	TCGA-E2-A10C-01A-21D-A10M-09	TCGA-E2-A10C-10A-01D-A10M-09
BRCA	TCGA-E2-A10F	TCGA-E2-A10F-01A-11D-A10M-09	TCGA-E2-A10F-10A-01D-A10M-09
BRCA	TCGA-E2-A14N	TCGA-E2-A14N-01A-31D-A135-09	TCGA-E2-A14N-10A-01D-A135-09
BRCA	TCGA-E2-A14O	TCGA-E2-A14O-01A-31D-A10Y-09	TCGA-E2-A14O-10A-01D-A110-09
BRCA	TCGA-E2-A14P	TCGA-E2-A14P-01A-31D-A12B-09	TCGA-E2-A14P-10A-01D-A12B-09
BRCA	TCGA-E2-A14Q	TCGA-E2-A14Q-01A-11D-A12B-09	TCGA-E2-A14Q-10A-01D-A12B-09
BRCA	TCGA-E2-A14R	TCGA-E2-A14R-01A-11D-A10Y-09	TCGA-E2-A14R-10A-01D-A110-09
BRCA	TCGA-E2-A14T	TCGA-E2-A14T-01A-11D-A10Y-09	TCGA-E2-A14T-10A-01D-A110-09
BRCA	TCGA-E2-A14V	TCGA-E2-A14V-01A-11D-A12B-09	TCGA-E2-A14V-10A-01D-A12B-09
BRCA	TCGA-E2-A14W	TCGA-E2-A14W-01A-11D-A12B-09	TCGA-E2-A14W-10A-01D-A12B-09
BRCA	TCGA-E2-A14X	TCGA-E2-A14X-01A-11D-A10Y-09	TCGA-E2-A14X-10A-01D-A110-09
BRCA	TCGA-E2-A14Y	TCGA-E2-A14Y-01A-21D-A12B-09	TCGA-E2-A14Y-10A-01D-A12B-09
BRCA	TCGA-E2-A14Z	TCGA-E2-A14Z-01A-11D-A10Y-09	TCGA-E2-A14Z-10A-01D-A110-09
BRCA	TCGA-E2-A150	TCGA-E2-A150-01A-11D-A12B-09	TCGA-E2-A150-10A-01D-A12B-09
BRCA	TCGA-E2-A152	TCGA-E2-A152-01A-11D-A12B-09	TCGA-E2-A152-10A-01D-A12B-09
BRCA	TCGA-E2-A153	TCGA-E2-A153-01A-12D-A12B-09	TCGA-E2-A153-11A-31D-A12B-09
BRCA	TCGA-E2-A154	TCGA-E2-A154-01A-11D-A10Y-09	TCGA-E2-A154-10A-01D-A110-09
BRCA	TCGA-E2-A155	TCGA-E2-A155-01A-11D-A12B-09	TCGA-E2-A155-10A-01D-A12B-09
BRCA	TCGA-E2-A156	TCGA-E2-A156-01A-11D-A12B-09	TCGA-E2-A156-10A-01D-A12B-09
BRCA	TCGA-E2-A158	TCGA-E2-A158-01A-11D-A12B-09	TCGA-E2-A158-10A-01D-A12B-09
BRCA	TCGA-E2-A159	TCGA-E2-A159-01A-11D-A10Y-09	TCGA-E2-A159-10A-01D-A110-09
BRCA	TCGA-E2-A15A	TCGA-E2-A15A-01A-11D-A12B-09	TCGA-E2-A15A-10A-01D-A12B-09
BRCA	TCGA-E2-A15C	TCGA-E2-A15C-01A-31D-A12B-09	TCGA-E2-A15C-10A-01D-A12B-09
BRCA	TCGA-E2-A15D	TCGA-E2-A15D-01A-11D-A10Y-09	TCGA-E2-A15D-10A-01D-A110-09
BRCA	TCGA-E2-A15E	TCGA-E2-A15E-01A-11D-A12B-09	TCGA-E2-A15E-10A-01D-A12B-09
BRCA	TCGA-E2-A15F	TCGA-E2-A15F-01A-11D-A10Y-09	TCGA-E2-A15F-10A-01D-A110-09
BRCA	TCGA-E2-A15G	TCGA-E2-A15G-01A-11D-A12B-09	TCGA-E2-A15G-10A-01D-A12B-09
BRCA	TCGA-E2-A15H	TCGA-E2-A15H-01A-11D-A12B-09	TCGA-E2-A15H-10A-01D-A12B-09
BRCA	TCGA-E2-A15I	TCGA-E2-A15I-01A-21D-A135-09	TCGA-E2-A15I-10A-01D-A135-09
BRCA	TCGA-E2-A15J	TCGA-E2-A15J-01A-11D-A12Q-09	TCGA-E2-A15J-10A-01D-A12Q-09
BRCA	TCGA-E2-A15K	TCGA-E2-A15K-01A-11D-A12Q-09	TCGA-E2-A15K-10A-01D-A12Q-09
BRCA	TCGA-E2-A15L	TCGA-E2-A15L-01A-11D-A12B-09	TCGA-E2-A15L-10A-01D-A12B-09
BRCA	TCGA-E2-A15M	TCGA-E2-A15M-01A-11D-A12B-09	TCGA-E2-A15M-10A-01D-A12B-09
BRCA	TCGA-E2-A15O	TCGA-E2-A15O-01A-11D-A10Y-09	TCGA-E2-A15O-10A-01D-A110-09
BRCA	TCGA-E2-A15P	TCGA-E2-A15P-01A-11D-A10Y-09	TCGA-E2-A15P-10A-01D-A110-09
BRCA	TCGA-E2-A15R	TCGA-E2-A15R-01A-11D-A10Y-09	TCGA-E2-A15R-10A-01D-A110-09
BRCA	TCGA-E2-A15S	TCGA-E2-A15S-01A-11D-A10Y-09	TCGA-E2-A15S-10A-01D-A110-09
BRCA	TCGA-E2-A15T	TCGA-E2-A15T-01A-11D-A10Y-09	TCGA-E2-A15T-10A-01D-A110-09
BRCA	TCGA-E2-A1AZ	TCGA-E2-A1AZ-01A-11D-A12Q-09	TCGA-E2-A1AZ-10A-01D-A12Q-09
BRCA	TCGA-E2-A1B0	TCGA-E2-A1B0-01A-11D-A12Q-09	TCGA-E2-A1B0-10A-01D-A12Q-09
BRCA	TCGA-E2-A1B1	TCGA-E2-A1B1-01A-21D-A12Q-09	TCGA-E2-A1B1-10A-01D-A12Q-09
BRCA	TCGA-E2-A1B4	TCGA-E2-A1B4-01A-11D-A12Q-09	TCGA-E2-A1B4-10A-01D-A12Q-09
BRCA	TCGA-E2-A1B5	TCGA-E2-A1B5-01A-21D-A12Q-09	TCGA-E2-A1B5-10A-01D-A12Q-09
BRCA	TCGA-E2-A1B6	TCGA-E2-A1B6-01A-31D-A12Q-09	TCGA-E2-A1B6-10A-01D-A12Q-09
BRCA	TCGA-E2-A1BC	TCGA-E2-A1BC-01A-11D-A14G-09	TCGA-E2-A1BC-11A-32D-A12Q-09
BRCA	TCGA-E2-A1BD	TCGA-E2-A1BD-01A-11D-A12Q-09	TCGA-E2-A1BD-10A-01D-A12Q-09
BRCA	TCGA-E2-A1IE	TCGA-E2-A1IE-01A-11D-A188-09	TCGA-E2-A1IE-10A-01D-A13O-09
BRCA	TCGA-E2-A1IF	TCGA-E2-A1IF-01A-11D-A142-09	TCGA-E2-A1IF-10A-01D-A142-09
BRCA	TCGA-E2-A1IG	TCGA-E2-A1IG-01A-11D-A142-09	TCGA-E2-A1IG-10A-01D-A142-09
BRCA	TCGA-E2-A1IH	TCGA-E2-A1IH-01A-11D-A188-09	TCGA-E2-A1IH-10A-01D-A13O-09
BRCA	TCGA-E2-A1II	TCGA-E2-A1II-01A-11D-A142-09	TCGA-E2-A1II-10A-01D-A142-09
BRCA	TCGA-E2-A1IJ	TCGA-E2-A1IJ-01A-11D-A142-09	TCGA-E2-A1IJ-10A-01D-A142-09
BRCA	TCGA-E2-A1IK	TCGA-E2-A1IK-01A-11D-A17G-09	TCGA-E2-A1IK-10A-01D-A142-09
BRCA	TCGA-E2-A1IL	TCGA-E2-A1IL-01A-11D-A14G-09	TCGA-E2-A1IL-10A-01D-A14G-09
BRCA	TCGA-E2-A1IN	TCGA-E2-A1IN-01A-11D-A13L-09	TCGA-E2-A1IN-10A-01D-A188-09
BRCA	TCGA-E2-A1IO	TCGA-E2-A1IO-01A-11D-A142-09	TCGA-E2-A1IO-10A-01D-A142-09
BRCA	TCGA-E2-A1IU	TCGA-E2-A1IU-01A-11D-A14G-09	TCGA-E2-A1IU-11A-61D-A14G-09
BRCA	TCGA-E2-A1L6	TCGA-E2-A1L6-01A-11D-A13L-09	TCGA-E2-A1L6-10A-01D-A13O-09
BRCA	TCGA-E2-A1L7	TCGA-E2-A1L7-01A-11D-A142-09	TCGA-E2-A1L7-10A-01D-A142-09
BRCA	TCGA-E2-A1L8	TCGA-E2-A1L8-01A-11D-A13L-09	TCGA-E2-A1L8-10A-01D-A13O-09
BRCA	TCGA-E2-A1L9	TCGA-E2-A1L9-01A-11D-A13L-09	TCGA-E2-A1L9-10A-01D-A188-09
BRCA	TCGA-E2-A1LA	TCGA-E2-A1LA-01A-11D-A142-09	TCGA-E2-A1LA-10A-01D-A142-09
BRCA	TCGA-E2-A1LB	TCGA-E2-A1LB-01A-11D-A142-09	TCGA-E2-A1LB-11A-22D-A142-09
BRCA	TCGA-E2-A1LG	TCGA-E2-A1LG-01A-21D-A14K-09	TCGA-E2-A1LG-11A-42D-A14K-09
BRCA	TCGA-E2-A1LH	TCGA-E2-A1LH-01A-11D-A14G-09	TCGA-E2-A1LH-11A-22D-A14G-09
BRCA	TCGA-E2-A1LI	TCGA-E2-A1LI-01A-12D-A159-09	TCGA-E2-A1LI-11A-23D-A17G-09
BRCA	TCGA-E2-A1LK	TCGA-E2-A1LK-01A-21D-A14G-09	TCGA-E2-A1LK-11A-12D-A14G-09
BRCA	TCGA-E2-A1LL	TCGA-E2-A1LL-01A-11D-A142-09	TCGA-E2-A1LL-11A-21D-A142-09
BRCA	TCGA-E2-A1LS	TCGA-E2-A1LS-01A-12D-A159-09	TCGA-E2-A1LS-11A-32W-A16L-09
BRCA	TCGA-E2-A2P6	TCGA-E2-A2P6-01A-11D-A19Y-09	TCGA-E2-A2P6-10B-01D-A19Y-09
BRCA	TCGA-E2-A56Z	TCGA-E2-A56Z-01A-12D-A29N-09	TCGA-E2-A56Z-10A-01D-A29N-09
BRCA	TCGA-E2-A570	TCGA-E2-A570-01A-11D-A29N-09	TCGA-E2-A570-10A-01D-A29N-09
BRCA	TCGA-E2-A572	TCGA-E2-A572-01A-13D-A31U-09	TCGA-E2-A572-10B-01D-A31U-09
BRCA	TCGA-E2-A573	TCGA-E2-A573-01A-11D-A29N-09	TCGA-E2-A573-10A-01D-A29N-09
BRCA	TCGA-E2-A574	TCGA-E2-A574-01A-11D-A29N-09	TCGA-E2-A574-10A-01D-A29N-09
BRCA	TCGA-E2-A576	TCGA-E2-A576-01A-11D-A31U-09	TCGA-E2-A576-10B-01D-A31U-09
BRCA	TCGA-E2-A9RU	TCGA-E2-A9RU-01A-11D-A41F-09	TCGA-E2-A9RU-10A-01D-A41F-09
BRCA	TCGA-E9-A1N3	TCGA-E9-A1N3-01A-12D-A159-09	TCGA-E9-A1N3-10A-01D-A159-09
BRCA	TCGA-E9-A1N4	TCGA-E9-A1N4-01A-11D-A14K-09	TCGA-E9-A1N4-10A-01D-A14K-09
BRCA	TCGA-E9-A1N5	TCGA-E9-A1N5-01A-11D-A14G-09	TCGA-E9-A1N5-10A-01D-A14G-09
BRCA	TCGA-E9-A1N8	TCGA-E9-A1N8-01A-11D-A142-09	TCGA-E9-A1N8-10A-01D-A142-09
BRCA	TCGA-E9-A1N9	TCGA-E9-A1N9-01A-11D-A14G-09	TCGA-E9-A1N9-10A-01D-A14G-09
BRCA	TCGA-E9-A1NA	TCGA-E9-A1NA-01A-11D-A142-09	TCGA-E9-A1NA-10A-01D-A142-09
BRCA	TCGA-E9-A1NC	TCGA-E9-A1NC-01A-12W-A16L-09	TCGA-E9-A1NC-10A-01D-A159-09
BRCA	TCGA-E9-A1ND	TCGA-E9-A1ND-01A-11D-A142-09	TCGA-E9-A1ND-10A-01W-A187-09
BRCA	TCGA-E9-A1NE	TCGA-E9-A1NE-01A-21D-A14K-09	TCGA-E9-A1NE-10A-01D-A14K-09
BRCA	TCGA-E9-A1NF	TCGA-E9-A1NF-01A-11D-A14G-09	TCGA-E9-A1NF-10A-01D-A14G-09
BRCA	TCGA-E9-A1NG	TCGA-E9-A1NG-01A-21D-A14K-09	TCGA-E9-A1NG-10A-01D-A14K-09
BRCA	TCGA-E9-A1NH	TCGA-E9-A1NH-01A-11D-A14G-09	TCGA-E9-A1NH-11A-33D-A14G-09
BRCA	TCGA-E9-A1NI	TCGA-E9-A1NI-01A-11W-A16H-09	TCGA-E9-A1NI-10A-01D-A17G-09
BRCA	TCGA-E9-A1QZ	TCGA-E9-A1QZ-01A-21D-A167-09	TCGA-E9-A1QZ-10A-01D-A167-09
BRCA	TCGA-E9-A1R0	TCGA-E9-A1R0-01A-22D-A16D-09	TCGA-E9-A1R0-10A-01D-A16D-09
BRCA	TCGA-E9-A1R2	TCGA-E9-A1R2-01A-11D-A14G-09	TCGA-E9-A1R2-10A-01D-A14G-09
BRCA	TCGA-E9-A1R3	TCGA-E9-A1R3-01A-31D-A14K-09	TCGA-E9-A1R3-10A-01D-A14K-09
BRCA	TCGA-E9-A1R4	TCGA-E9-A1R4-01A-21D-A14G-09	TCGA-E9-A1R4-10A-01D-A14G-09
BRCA	TCGA-E9-A1R5	TCGA-E9-A1R5-01A-11D-A14K-09	TCGA-E9-A1R5-10A-01D-A14K-09
BRCA	TCGA-E9-A1R6	TCGA-E9-A1R6-01A-11D-A14G-09	TCGA-E9-A1R6-10A-01D-A14G-09
BRCA	TCGA-E9-A1R7	TCGA-E9-A1R7-01A-11D-A14K-09	TCGA-E9-A1R7-10A-01D-A14K-09
BRCA	TCGA-E9-A1RA	TCGA-E9-A1RA-01A-11D-A14G-09	TCGA-E9-A1RA-10A-01D-A14G-09
BRCA	TCGA-E9-A1RB	TCGA-E9-A1RB-01A-11D-A17G-09	TCGA-E9-A1RB-10A-01D-A159-09
BRCA	TCGA-E9-A1RC	TCGA-E9-A1RC-01A-11D-A159-09	TCGA-E9-A1RC-10A-01D-A159-09
BRCA	TCGA-E9-A1RD	TCGA-E9-A1RD-01A-11D-A159-09	TCGA-E9-A1RD-10A-01D-A159-09
BRCA	TCGA-E9-A1RE	TCGA-E9-A1RE-01A-11D-A159-09	TCGA-E9-A1RE-10A-01D-A159-09
BRCA	TCGA-E9-A1RF	TCGA-E9-A1RF-01A-11D-A159-09	TCGA-E9-A1RF-10A-01D-A159-09
BRCA	TCGA-E9-A1RG	TCGA-E9-A1RG-01A-11D-A14G-09	TCGA-E9-A1RG-10A-01D-A14G-09
BRCA	TCGA-E9-A1RH	TCGA-E9-A1RH-01A-21D-A167-09	TCGA-E9-A1RH-10A-01D-A167-09
BRCA	TCGA-E9-A1RI	TCGA-E9-A1RI-01A-11D-A167-09	TCGA-E9-A1RI-10A-01D-A167-09
BRCA	TCGA-E9-A226	TCGA-E9-A226-01A-21D-A159-09	TCGA-E9-A226-10A-01D-A159-09
BRCA	TCGA-E9-A227	TCGA-E9-A227-01A-11D-A159-09	TCGA-E9-A227-10A-01D-A159-09
BRCA	TCGA-E9-A228	TCGA-E9-A228-01A-31D-A159-09	TCGA-E9-A228-10A-01D-A159-09
BRCA	TCGA-E9-A229	TCGA-E9-A229-01A-31D-A17G-09	TCGA-E9-A229-10B-01D-A159-09
BRCA	TCGA-E9-A22A	TCGA-E9-A22A-01A-11D-A159-09	TCGA-E9-A22A-10A-01D-A159-09
BRCA	TCGA-E9-A22B	TCGA-E9-A22B-01A-11D-A159-09	TCGA-E9-A22B-10A-01D-A159-09
BRCA	TCGA-E9-A22D	TCGA-E9-A22D-01A-11D-A159-09	TCGA-E9-A22D-10A-01D-A159-09
BRCA	TCGA-E9-A22E	TCGA-E9-A22E-01A-11D-A159-09	TCGA-E9-A22E-10A-01D-A159-09
BRCA	TCGA-E9-A22G	TCGA-E9-A22G-01A-11D-A159-09	TCGA-E9-A22G-10A-01D-A159-09
BRCA	TCGA-E9-A22H	TCGA-E9-A22H-01A-11D-A159-09	TCGA-E9-A22H-10A-01D-A17G-09
BRCA	TCGA-E9-A243	TCGA-E9-A243-01A-21D-A167-09	TCGA-E9-A243-10A-01D-A17G-09
BRCA	TCGA-E9-A244	TCGA-E9-A244-01A-11D-A167-09	TCGA-E9-A244-10A-01D-A167-09
BRCA	TCGA-E9-A245	TCGA-E9-A245-01A-22D-A16D-09	TCGA-E9-A245-10A-01D-A16D-09
BRCA	TCGA-E9-A247	TCGA-E9-A247-01A-11D-A167-09	TCGA-E9-A247-10A-01D-A167-09
BRCA	TCGA-E9-A248	TCGA-E9-A248-01A-11D-A167-09	TCGA-E9-A248-10A-01D-A167-09
BRCA	TCGA-E9-A249	TCGA-E9-A249-01A-11D-A167-09	TCGA-E9-A249-10A-01D-A167-09
BRCA	TCGA-E9-A24A	TCGA-E9-A24A-01A-11D-A167-09	TCGA-E9-A24A-10A-01D-A167-09
BRCA	TCGA-E9-A295	TCGA-E9-A295-01A-11D-A16D-09	TCGA-E9-A295-10A-01D-A16D-09
BRCA	TCGA-E9-A2JS	TCGA-E9-A2JS-01A-11D-A17W-09	TCGA-E9-A2JS-10A-01D-A17W-09
BRCA	TCGA-E9-A2JT	TCGA-E9-A2JT-01A-22D-A18P-09	TCGA-E9-A2JT-10A-01D-A18P-09
BRCA	TCGA-E9-A3HO	TCGA-E9-A3HO-01A-11D-A20S-09	TCGA-E9-A3HO-10A-02D-A20S-09
BRCA	TCGA-E9-A3QA	TCGA-E9-A3QA-01A-61D-A228-09	TCGA-E9-A3QA-10A-01D-A22A-09
BRCA	TCGA-E9-A3X8	TCGA-E9-A3X8-01A-31D-A22X-09	TCGA-E9-A3X8-10B-01D-A22X-09
BRCA	TCGA-E9-A54Y	TCGA-E9-A54Y-01A-11D-A25Q-09	TCGA-E9-A54Y-10A-01D-A25Q-09
BRCA	TCGA-E9-A5FK	TCGA-E9-A5FK-01A-11D-A27P-09	TCGA-E9-A5FK-10A-01D-A27P-09
BRCA	TCGA-E9-A5FL	TCGA-E9-A5FL-01A-11D-A27P-09	TCGA-E9-A5FL-10A-01D-A27P-09
BRCA	TCGA-E9-A5UO	TCGA-E9-A5UO-01A-11D-A28B-09	TCGA-E9-A5UO-10A-01D-A28E-09
BRCA	TCGA-E9-A6HE	TCGA-E9-A6HE-01A-11D-A31U-09	TCGA-E9-A6HE-10A-01D-A31U-09
BRCA	TCGA-EW-A1IW	TCGA-EW-A1IW-01A-11D-A13L-09	TCGA-EW-A1IW-10A-01D-A13O-09
BRCA	TCGA-EW-A1IX	TCGA-EW-A1IX-01A-12D-A142-09	TCGA-EW-A1IX-10A-01D-A142-09
BRCA	TCGA-EW-A1IY	TCGA-EW-A1IY-01A-11D-A188-09	TCGA-EW-A1IY-10A-01D-A13O-09
BRCA	TCGA-EW-A1IZ	TCGA-EW-A1IZ-01A-11D-A188-09	TCGA-EW-A1IZ-10A-01D-A13O-09
BRCA	TCGA-EW-A1J1	TCGA-EW-A1J1-01A-11D-A188-09	TCGA-EW-A1J1-10A-01D-A13O-09
BRCA	TCGA-EW-A1J2	TCGA-EW-A1J2-01A-21D-A13L-09	TCGA-EW-A1J2-10A-01W-A14R-09
BRCA	TCGA-EW-A1J3	TCGA-EW-A1J3-01A-11D-A13L-09	TCGA-EW-A1J3-10A-01D-A13O-09
BRCA	TCGA-EW-A1J5	TCGA-EW-A1J5-01A-11D-A13L-09	TCGA-EW-A1J5-10A-01D-A13O-09
BRCA	TCGA-EW-A1J6	TCGA-EW-A1J6-01A-11D-A188-09	TCGA-EW-A1J6-10A-01D-A13O-09
BRCA	TCGA-EW-A1OV	TCGA-EW-A1OV-01A-11D-A142-09	TCGA-EW-A1OV-10A-01D-A142-09
BRCA	TCGA-EW-A1OX	TCGA-EW-A1OX-01A-11D-A142-09	TCGA-EW-A1OX-10A-01D-A142-09
BRCA	TCGA-EW-A1OY	TCGA-EW-A1OY-01A-11D-A142-09	TCGA-EW-A1OY-10A-01W-A187-09
BRCA	TCGA-EW-A1OZ	TCGA-EW-A1OZ-01A-11D-A142-09	TCGA-EW-A1OZ-10A-01D-A142-09
BRCA	TCGA-EW-A1P0	TCGA-EW-A1P0-01A-11D-A142-09	TCGA-EW-A1P0-10A-01D-A142-09
BRCA	TCGA-EW-A1P1	TCGA-EW-A1P1-01A-31D-A14G-09	TCGA-EW-A1P1-10A-01D-A14G-09
BRCA	TCGA-EW-A1P3	TCGA-EW-A1P3-01A-11D-A142-09	TCGA-EW-A1P3-10A-01D-A142-09
BRCA	TCGA-EW-A1P4	TCGA-EW-A1P4-01A-21D-A142-09	TCGA-EW-A1P4-10A-01D-A142-09
BRCA	TCGA-EW-A1P5	TCGA-EW-A1P5-01A-11D-A142-09	TCGA-EW-A1P5-10A-01D-A142-09
BRCA	TCGA-EW-A1P6	TCGA-EW-A1P6-01A-11D-A142-09	TCGA-EW-A1P6-10A-01D-A142-09
BRCA	TCGA-EW-A1P7	TCGA-EW-A1P7-01A-21D-A142-09	TCGA-EW-A1P7-10A-01D-A142-09
BRCA	TCGA-EW-A1P8	TCGA-EW-A1P8-01A-11D-A142-09	TCGA-EW-A1P8-10A-01D-A142-09
BRCA	TCGA-EW-A1PA	TCGA-EW-A1PA-01A-11D-A142-09	TCGA-EW-A1PA-10A-01D-A142-09
BRCA	TCGA-EW-A1PB	TCGA-EW-A1PB-01A-11D-A142-09	TCGA-EW-A1PB-10A-01D-A142-09
BRCA	TCGA-EW-A1PD	TCGA-EW-A1PD-01A-11D-A142-09	TCGA-EW-A1PD-10A-01D-A142-09
BRCA	TCGA-EW-A1PE	TCGA-EW-A1PE-01A-11D-A142-09	TCGA-EW-A1PE-10A-01D-A142-09
BRCA	TCGA-EW-A1PG	TCGA-EW-A1PG-01A-11D-A142-09	TCGA-EW-A1PG-10A-01D-A142-09
BRCA	TCGA-EW-A1PH	TCGA-EW-A1PH-01A-11D-A14K-09	TCGA-EW-A1PH-10A-01D-A14K-09
BRCA	TCGA-EW-A2FR	TCGA-EW-A2FR-01A-11D-A21Q-09	TCGA-EW-A2FR-10A-01D-A21Q-09
BRCA	TCGA-EW-A2FS	TCGA-EW-A2FS-01A-11D-A17D-09	TCGA-EW-A2FS-10A-01D-A17D-09
BRCA	TCGA-EW-A2FV	TCGA-EW-A2FV-01A-11D-A17D-09	TCGA-EW-A2FV-10A-01D-A17D-09
BRCA	TCGA-EW-A2FW	TCGA-EW-A2FW-01A-11D-A17D-09	TCGA-EW-A2FW-10A-01D-A17D-09
BRCA	TCGA-EW-A423	TCGA-EW-A423-01A-11D-A243-09	TCGA-EW-A423-10A-01D-A243-09
BRCA	TCGA-EW-A6S9	TCGA-EW-A6S9-01A-22D-A33E-09	TCGA-EW-A6S9-10A-01D-A33H-09
BRCA	TCGA-EW-A6SA	TCGA-EW-A6SA-01A-21D-A32I-09	TCGA-EW-A6SA-10A-01D-A32I-09
BRCA	TCGA-EW-A6SB	TCGA-EW-A6SB-01A-12D-A32I-09	TCGA-EW-A6SB-10A-01D-A32I-09
BRCA	TCGA-EW-A6SC	TCGA-EW-A6SC-01A-12D-A32I-09	TCGA-EW-A6SC-10A-01D-A32I-09
BRCA	TCGA-EW-A6SD	TCGA-EW-A6SD-01A-12D-A33E-09	TCGA-EW-A6SD-10A-01D-A33H-09
BRCA	TCGA-GI-A2C8	TCGA-GI-A2C8-01A-11D-A16D-09	TCGA-GI-A2C8-11A-22D-A16D-09
BRCA	TCGA-GM-A2D9	TCGA-GM-A2D9-01A-11D-A18P-09	TCGA-GM-A2D9-11A-42D-A18P-09
BRCA	TCGA-GM-A2DA	TCGA-GM-A2DA-01A-11D-A18P-09	TCGA-GM-A2DA-10C-01D-A18P-09
BRCA	TCGA-GM-A2DB	TCGA-GM-A2DB-01A-31D-A19Y-09	TCGA-GM-A2DB-10C-01D-A18P-09
BRCA	TCGA-GM-A2DC	TCGA-GM-A2DC-01A-11D-A18P-09	TCGA-GM-A2DC-10C-01D-A18P-09
BRCA	TCGA-GM-A2DD	TCGA-GM-A2DD-01A-11D-A17W-09	TCGA-GM-A2DD-10C-01D-A17W-09
BRCA	TCGA-GM-A2DF	TCGA-GM-A2DF-01A-11D-A17W-09	TCGA-GM-A2DF-10C-01D-A17W-09
BRCA	TCGA-GM-A2DH	TCGA-GM-A2DH-01A-11D-A17W-09	TCGA-GM-A2DH-10C-01D-A17W-09
BRCA	TCGA-GM-A2DI	TCGA-GM-A2DI-01A-31D-A18P-09	TCGA-GM-A2DI-11A-13D-A18P-09
BRCA	TCGA-GM-A2DK	TCGA-GM-A2DK-01A-21D-A17W-09	TCGA-GM-A2DK-10C-01D-A17W-09
BRCA	TCGA-GM-A2DL	TCGA-GM-A2DL-01A-11D-A18P-09	TCGA-GM-A2DL-10C-01D-A18P-09
BRCA	TCGA-GM-A2DM	TCGA-GM-A2DM-01A-11D-A17W-09	TCGA-GM-A2DM-10C-01D-A17W-09
BRCA	TCGA-GM-A2DN	TCGA-GM-A2DN-01A-11D-A17W-09	TCGA-GM-A2DN-10C-01D-A17W-09
BRCA	TCGA-GM-A2DO	TCGA-GM-A2DO-01A-11D-A19Y-09	TCGA-GM-A2DO-10D-01D-A18P-09
BRCA	TCGA-GM-A3NW	TCGA-GM-A3NW-01A-21D-A228-09	TCGA-GM-A3NW-10A-01D-A22A-09
BRCA	TCGA-GM-A3XL	TCGA-GM-A3XL-01A-11D-A22X-09	TCGA-GM-A3XL-10A-01D-A22X-09
BRCA	TCGA-GM-A4E0	TCGA-GM-A4E0-01A-12D-A25Q-09	TCGA-GM-A4E0-10A-01D-A25Q-09
BRCA	TCGA-GM-A5PV	TCGA-GM-A5PV-01A-11D-A28B-09	TCGA-GM-A5PV-10A-01D-A28E-09
BRCA	TCGA-GM-A5PX	TCGA-GM-A5PX-01A-12D-A28B-09	TCGA-GM-A5PX-10A-01D-A28E-09
BRCA	TCGA-HN-A2NL	TCGA-HN-A2NL-01A-11D-A18P-09	TCGA-HN-A2NL-10A-01D-A18P-09
BRCA	TCGA-HN-A2OB	TCGA-HN-A2OB-01A-21D-A27P-09	TCGA-HN-A2OB-10B-01D-A27P-09
BRCA	TCGA-JL-A3YX	TCGA-JL-A3YX-01A-11D-A22X-09	TCGA-JL-A3YX-10A-01D-A22X-09
BRCA	TCGA-LD-A66U	TCGA-LD-A66U-01A-11D-A31U-09	TCGA-LD-A66U-10A-01D-A31U-09
BRCA	TCGA-LD-A74U	TCGA-LD-A74U-01A-13D-A33E-09	TCGA-LD-A74U-10A-01D-A33H-09
BRCA	TCGA-LD-A7W5	TCGA-LD-A7W5-01A-22D-A351-09	TCGA-LD-A7W5-10A-01D-A351-09
BRCA	TCGA-LD-A7W6	TCGA-LD-A7W6-01A-81D-A351-09	TCGA-LD-A7W6-10A-01D-A351-09
BRCA	TCGA-LD-A9QF	TCGA-LD-A9QF-01A-32D-A41F-09	TCGA-LD-A9QF-10A-01D-A41F-09
BRCA	TCGA-LL-A440	TCGA-LL-A440-01A-11D-A243-09	TCGA-LL-A440-10A-01D-A243-09
BRCA	TCGA-LL-A50Y	TCGA-LL-A50Y-01A-11D-A25Q-09	TCGA-LL-A50Y-10A-01D-A25Q-09
BRCA	TCGA-LL-A5YL	TCGA-LL-A5YL-01A-12D-A29N-09	TCGA-LL-A5YL-10A-01D-A29N-09
BRCA	TCGA-LL-A5YM	TCGA-LL-A5YM-01A-11D-A28B-09	TCGA-LL-A5YM-10A-01D-A28E-09
BRCA	TCGA-LL-A5YN	TCGA-LL-A5YN-01A-11D-A28B-09	TCGA-LL-A5YN-10A-01D-A28E-09
BRCA	TCGA-LL-A5YO	TCGA-LL-A5YO-01A-21D-A28B-09	TCGA-LL-A5YO-10A-01D-A28E-09
BRCA	TCGA-LL-A5YP	TCGA-LL-A5YP-01A-21D-A28B-09	TCGA-LL-A5YP-10A-01D-A28E-09
BRCA	TCGA-LL-A6FP	TCGA-LL-A6FP-01A-11D-A31U-09	TCGA-LL-A6FP-10A-01D-A31U-09
BRCA	TCGA-LL-A6FQ	TCGA-LL-A6FQ-01A-11D-A31U-09	TCGA-LL-A6FQ-10A-01D-A31U-09
BRCA	TCGA-LL-A6FR	TCGA-LL-A6FR-01A-12D-A31U-09	TCGA-LL-A6FR-10B-01D-A31U-09
BRCA	TCGA-LL-A73Y	TCGA-LL-A73Y-01A-11D-A33E-09	TCGA-LL-A73Y-10B-01D-A33H-09
BRCA	TCGA-LL-A73Z	TCGA-LL-A73Z-01A-11D-A32I-09	TCGA-LL-A73Z-10B-01D-A32I-09
BRCA	TCGA-LL-A740	TCGA-LL-A740-01A-21D-A32I-09	TCGA-LL-A740-10B-01D-A32I-09
BRCA	TCGA-LL-A7SZ	TCGA-LL-A7SZ-01A-32D-A351-09	TCGA-LL-A7SZ-10A-01D-A351-09
BRCA	TCGA-LL-A7T0	TCGA-LL-A7T0-01A-31D-A351-09	TCGA-LL-A7T0-10A-01D-A351-09
BRCA	TCGA-LL-A8F5	TCGA-LL-A8F5-01A-11D-A36J-09	TCGA-LL-A8F5-10A-01D-A36M-09
BRCA	TCGA-LL-A9Q3	TCGA-LL-A9Q3-01A-11D-A41F-09	TCGA-LL-A9Q3-10A-01D-A41F-09
BRCA	TCGA-OK-A5Q2	TCGA-OK-A5Q2-01A-11D-A27P-09	TCGA-OK-A5Q2-10A-01D-A27P-09
BRCA	TCGA-OL-A5D6	TCGA-OL-A5D6-01A-21D-A27P-09	TCGA-OL-A5D6-10A-01D-A27P-09
BRCA	TCGA-OL-A5D7	TCGA-OL-A5D7-01A-11D-A27P-09	TCGA-OL-A5D7-10A-01D-A27P-09
BRCA	TCGA-OL-A5D8	TCGA-OL-A5D8-01A-11D-A27P-09	TCGA-OL-A5D8-10A-01D-A27P-09
BRCA	TCGA-OL-A5DA	TCGA-OL-A5DA-01A-11D-A27P-09	TCGA-OL-A5DA-10A-01D-A27P-09
BRCA	TCGA-OL-A5RU	TCGA-OL-A5RU-01A-11D-A28B-09	TCGA-OL-A5RU-10A-01D-A28E-09
BRCA	TCGA-OL-A5RV	TCGA-OL-A5RV-01A-12D-A28B-09	TCGA-OL-A5RV-10A-01D-A28E-09
BRCA	TCGA-OL-A5RW	TCGA-OL-A5RW-01A-11D-A28B-09	TCGA-OL-A5RW-10A-01D-A28E-09
BRCA	TCGA-OL-A5RX	TCGA-OL-A5RX-01A-11D-A28B-09	TCGA-OL-A5RX-10A-01D-A28E-09
BRCA	TCGA-OL-A5RY	TCGA-OL-A5RY-01A-21D-A28B-09	TCGA-OL-A5RY-10A-01D-A28E-09
BRCA	TCGA-OL-A5RZ	TCGA-OL-A5RZ-01A-11D-A28B-09	TCGA-OL-A5RZ-10A-01D-A28E-09
BRCA	TCGA-OL-A5S0	TCGA-OL-A5S0-01A-11D-A28B-09	TCGA-OL-A5S0-10A-01D-A28E-09
BRCA	TCGA-OL-A66H	TCGA-OL-A66H-01A-11D-A29N-09	TCGA-OL-A66H-10A-01D-A29N-09
BRCA	TCGA-OL-A66I	TCGA-OL-A66I-01A-21D-A29N-09	TCGA-OL-A66I-10A-01D-A29N-09
BRCA	TCGA-OL-A66J	TCGA-OL-A66J-01A-11D-A29N-09	TCGA-OL-A66J-10A-01D-A29N-09
BRCA	TCGA-OL-A66K	TCGA-OL-A66K-01A-11D-A29N-09	TCGA-OL-A66K-10A-01D-A29N-09
BRCA	TCGA-OL-A66L	TCGA-OL-A66L-01A-12D-A31U-09	TCGA-OL-A66L-10A-01D-A31U-09
BRCA	TCGA-OL-A66N	TCGA-OL-A66N-01A-12D-A31U-09	TCGA-OL-A66N-10A-01D-A31U-09
BRCA	TCGA-OL-A66O	TCGA-OL-A66O-01A-11D-A31U-09	TCGA-OL-A66O-10A-01D-A31U-09
BRCA	TCGA-OL-A66P	TCGA-OL-A66P-01A-11D-A31U-09	TCGA-OL-A66P-10A-01D-A31U-09
BRCA	TCGA-OL-A6VO	TCGA-OL-A6VO-01A-12D-A33E-09	TCGA-OL-A6VO-10A-01D-A33H-09
BRCA	TCGA-OL-A6VQ	TCGA-OL-A6VQ-01A-12D-A41F-09	TCGA-OL-A6VQ-10B-01D-A41F-09
BRCA	TCGA-OL-A6VR	TCGA-OL-A6VR-01A-32D-A33E-09	TCGA-OL-A6VR-10A-01D-A33H-09
BRCA	TCGA-OL-A97C	TCGA-OL-A97C-01A-32D-A41F-09	TCGA-OL-A97C-10A-01D-A41F-09
BRCA	TCGA-PE-A5DC	TCGA-PE-A5DC-01A-12D-A27P-09	TCGA-PE-A5DC-10A-01D-A27P-09
BRCA	TCGA-PE-A5DD	TCGA-PE-A5DD-01A-12D-A27P-09	TCGA-PE-A5DD-10A-01D-A27P-09
BRCA	TCGA-PE-A5DE	TCGA-PE-A5DE-01A-11D-A27P-09	TCGA-PE-A5DE-10A-01D-A27P-09
BRCA	TCGA-PL-A8LV	TCGA-PL-A8LV-01A-21D-A41F-09	TCGA-PL-A8LV-10A-01D-A41F-09
BRCA	TCGA-PL-A8LX	TCGA-PL-A8LX-01A-11D-A41F-09	TCGA-PL-A8LX-10A-01D-A41F-09
BRCA	TCGA-PL-A8LY	TCGA-PL-A8LY-01A-11D-A41F-09	TCGA-PL-A8LY-10A-01D-A41F-09
BRCA	TCGA-PL-A8LZ	TCGA-PL-A8LZ-01A-31D-A36J-09	TCGA-PL-A8LZ-10A-01D-A36M-09
BRCA	TCGA-S3-A6ZF	TCGA-S3-A6ZF-01A-32D-A32I-09	TCGA-S3-A6ZF-10B-01D-A32I-09
BRCA	TCGA-S3-A6ZG	TCGA-S3-A6ZG-01A-22D-A32I-09	TCGA-S3-A6ZG-10B-01D-A32I-09
BRCA	TCGA-S3-A6ZH	TCGA-S3-A6ZH-01A-22D-A32I-09	TCGA-S3-A6ZH-10B-01D-A32I-09
BRCA	TCGA-S3-AA0Z	TCGA-S3-AA0Z-01A-11D-A41F-09	TCGA-S3-AA0Z-10A-01D-A41F-09
BRCA	TCGA-S3-AA10	TCGA-S3-AA10-01A-21D-A41F-09	TCGA-S3-AA10-10A-01D-A41F-09
BRCA	TCGA-S3-AA11	TCGA-S3-AA11-01A-31D-A41F-09	TCGA-S3-AA11-10B-01D-A41F-09
BRCA	TCGA-S3-AA12	TCGA-S3-AA12-01A-11D-A41F-09	TCGA-S3-AA12-10A-01D-A41F-09
BRCA	TCGA-S3-AA14	TCGA-S3-AA14-01A-11D-A41F-09	TCGA-S3-AA14-10A-01D-A41F-09
BRCA	TCGA-S3-AA15	TCGA-S3-AA15-01A-11D-A41F-09	TCGA-S3-AA15-10A-01D-A41F-09
BRCA	TCGA-S3-AA17	TCGA-S3-AA17-01A-11D-A41F-09	TCGA-S3-AA17-10A-01D-A41F-09
BRCA		TCGA-UL-AAZ6-01A-11D-A41F-09	TCGA-UL-AAZ6-10A-01D-A41F-09
BRCA		TCGA-UU-A93S-01A-21D-A41F-09	TCGA-UU-A93S-10A-01D-A41F-09
BRCA		TCGA-V7-A7HQ-01A-11D-A33E-09	TCGA-V7-A7HQ-10A-01D-A33H-09
BRCA		TCGA-W8-A86G-01A-21D-A36J-09	TCGA-W8-A86G-10A-01D-A36M-09
BRCA		TCGA-WT-AB41-01A-11D-A41F-09	TCGA-WT-AB41-10A-01D-A41F-09
BRCA		TCGA-WT-AB44-01A-11D-A41F-09	TCGA-WT-AB44-10A-01D-A41F-09
BRCA		TCGA-XX-A899-01A-11D-A36J-09	TCGA-XX-A899-10A-01D-A36M-09
BRCA		TCGA-XX-A89A-01A-11D-A36J-09	TCGA-XX-A89A-10A-01D-A36M-09
BRCA		TCGA-Z7-A8R5-01A-42D-A41F-09	TCGA-Z7-A8R5-10A-01D-A41F-09
BRCA		TCGA-Z7-A8R6-01A-11D-A41F-09	TCGA-Z7-A8R6-10A-01D-A41F-09
	TCGA-UL-AAZ6
	TCGA-UU-A93S
	TCGA-V7-A7HQ
	TCGA-W8-A86G
	TCGA-WT-AB41
	TCGA-WT-AB44
	TCGA-XX-A899
	TCGA-XX-A89A
	TCGA-Z7-A8R5
	TCGA-Z7-A8R6

## Sheet: CESC
Cancer type	CDR list	Tumor_Sample_Barcode	Matched_Norm_Sample_Barcode
CESC	TCGA-4J-AA1J	TCGA-4J-AA1J-01A-21D-A387-09	TCGA-4J-AA1J-10A-01D-A38A-09
CESC	TCGA-BI-A0VR	TCGA-BI-A0VR-01A-11D-A10S-08	TCGA-BI-A0VR-10A-01D-A10S-08
CESC	TCGA-BI-A0VS	TCGA-BI-A0VS-01A-11D-A10S-08	TCGA-BI-A0VS-10A-01D-A10S-08
CESC	TCGA-BI-A20A	TCGA-BI-A20A-01A-11D-A14W-08	TCGA-BI-A20A-10A-01D-A14W-08
CESC	TCGA-C5-A0TN	TCGA-C5-A0TN-01A-21D-A14W-08	TCGA-C5-A0TN-10B-01D-A14W-08
CESC	TCGA-C5-A1BE	TCGA-C5-A1BE-01B-11D-A13W-08	TCGA-C5-A1BE-10A-01D-A13W-08
CESC	TCGA-C5-A1BF	TCGA-C5-A1BF-01B-11D-A13W-08	TCGA-C5-A1BF-10A-01D-A13W-08
CESC	TCGA-C5-A1BI	TCGA-C5-A1BI-01B-11D-A13W-08	TCGA-C5-A1BI-10A-01D-A13W-08
CESC	TCGA-C5-A1BJ	TCGA-C5-A1BJ-01A-11D-A13W-08	TCGA-C5-A1BJ-10A-01D-A13W-08
CESC	TCGA-C5-A1BK	TCGA-C5-A1BK-01B-11D-A13W-08	TCGA-C5-A1BK-10A-01D-A13W-08
CESC	TCGA-C5-A1BL	TCGA-C5-A1BL-01A-11D-A13W-08	TCGA-C5-A1BL-10A-01D-A13W-08
CESC	TCGA-C5-A1BM	TCGA-C5-A1BM-01A-11D-A13W-08	TCGA-C5-A1BM-10A-01D-A13W-08
CESC	TCGA-C5-A1BN	TCGA-C5-A1BN-01B-11D-A14W-08	TCGA-C5-A1BN-10A-01D-A14W-08
CESC	TCGA-C5-A1M5	TCGA-C5-A1M5-01A-11D-A13W-08	TCGA-C5-A1M5-10A-01D-A13W-08
CESC	TCGA-C5-A1M6	TCGA-C5-A1M6-01A-11D-A13W-08	TCGA-C5-A1M6-10A-01D-A13W-08
CESC	TCGA-C5-A1M7	TCGA-C5-A1M7-01A-11D-A13W-08	TCGA-C5-A1M7-10A-01D-A13W-08
CESC	TCGA-C5-A1M8	TCGA-C5-A1M8-01A-21D-A13W-08	TCGA-C5-A1M8-10A-01D-A13W-08
CESC	TCGA-C5-A1M9	TCGA-C5-A1M9-01A-11D-A13W-08	TCGA-C5-A1M9-10A-01D-A13W-08
CESC	TCGA-C5-A1ME	TCGA-C5-A1ME-01A-11D-A13W-08	TCGA-C5-A1ME-10A-01D-A13W-08
CESC	TCGA-C5-A1MF	TCGA-C5-A1MF-01A-11D-A13W-08	TCGA-C5-A1MF-10A-01D-A13W-08
CESC	TCGA-C5-A1MH	TCGA-C5-A1MH-01A-11D-A14W-08	TCGA-C5-A1MH-10A-01D-A14W-08
CESC	TCGA-C5-A1MI	TCGA-C5-A1MI-01A-11D-A14W-08	TCGA-C5-A1MI-10A-01D-A14W-08
CESC	TCGA-C5-A1MJ	TCGA-C5-A1MJ-01A-11D-A14W-08	TCGA-C5-A1MJ-10A-01D-A14W-08
CESC	TCGA-C5-A1MK	TCGA-C5-A1MK-01A-11D-A14W-08	TCGA-C5-A1MK-10A-01D-A14W-08
CESC	TCGA-C5-A1ML	TCGA-C5-A1ML-01A-11D-A14W-08	TCGA-C5-A1ML-10A-01D-A14W-08
CESC	TCGA-C5-A1MN	TCGA-C5-A1MN-01A-11D-A14W-08	TCGA-C5-A1MN-10A-01D-A14W-08
CESC	TCGA-C5-A1MP	TCGA-C5-A1MP-01A-11D-A14W-08	TCGA-C5-A1MP-10A-01D-A14W-08
CESC	TCGA-C5-A1MQ	TCGA-C5-A1MQ-01A-11D-A14W-08	TCGA-C5-A1MQ-10A-01D-A14W-08
CESC	TCGA-C5-A2LS	TCGA-C5-A2LS-01A-22D-A22X-09	TCGA-C5-A2LS-10A-01D-A22X-09
CESC	TCGA-C5-A2LT	TCGA-C5-A2LT-01A-11D-A18J-09	TCGA-C5-A2LT-10A-01D-A18J-09
CESC	TCGA-C5-A2LV	TCGA-C5-A2LV-01A-11D-A18J-09	TCGA-C5-A2LV-10A-01D-A18J-09
CESC	TCGA-C5-A2LX	TCGA-C5-A2LX-01A-11D-A18J-09	TCGA-C5-A2LX-10A-01D-A18J-09
CESC	TCGA-C5-A2LY	TCGA-C5-A2LY-01A-31D-A18J-09	TCGA-C5-A2LY-10A-01D-A18J-09
CESC	TCGA-C5-A2M1	TCGA-C5-A2M1-01A-11D-A18J-09	TCGA-C5-A2M1-10A-01D-A18J-09
CESC	TCGA-C5-A2M2	TCGA-C5-A2M2-01A-21D-A18J-09	TCGA-C5-A2M2-10A-01D-A18J-09
CESC	TCGA-C5-A3HF	TCGA-C5-A3HF-01A-11D-A20U-09	TCGA-C5-A3HF-10A-01D-A20U-09
CESC	TCGA-C5-A7CG	TCGA-C5-A7CG-01A-11D-A32I-09	TCGA-C5-A7CG-10A-01D-A32I-09
CESC	TCGA-C5-A7CH	TCGA-C5-A7CH-01A-11D-A33O-09	TCGA-C5-A7CH-10A-01D-A33O-09
CESC	TCGA-C5-A7CJ	TCGA-C5-A7CJ-01A-11D-A32I-09	TCGA-C5-A7CJ-10A-01D-A32I-09
CESC	TCGA-C5-A7CK	TCGA-C5-A7CK-01A-11D-A32I-09	TCGA-C5-A7CK-10A-01D-A32I-09
CESC	TCGA-C5-A7CL	TCGA-C5-A7CL-01A-11D-A32I-09	TCGA-C5-A7CL-10A-01D-A32I-09
CESC	TCGA-C5-A7CM	TCGA-C5-A7CM-01A-11D-A33O-09	TCGA-C5-A7CM-10A-01D-A33O-09
CESC	TCGA-C5-A7CO	TCGA-C5-A7CO-01A-11D-A351-09	TCGA-C5-A7CO-10A-01D-A351-09
CESC	TCGA-C5-A7UC	TCGA-C5-A7UC-01A-11D-A351-09	TCGA-C5-A7UC-10A-01D-A351-09
CESC	TCGA-C5-A7UE	TCGA-C5-A7UE-01A-11D-A33O-09	TCGA-C5-A7UE-10A-01D-A33O-09
CESC	TCGA-C5-A7UH	TCGA-C5-A7UH-01A-11D-A351-09	TCGA-C5-A7UH-10A-01D-A351-09
CESC	TCGA-C5-A7UI	TCGA-C5-A7UI-01A-11D-A36J-09	TCGA-C5-A7UI-10B-01D-A36M-09
CESC	TCGA-C5-A7X3	TCGA-C5-A7X3-01A-11D-A351-09	TCGA-C5-A7X3-10A-01D-A351-09
CESC	TCGA-C5-A7X5	TCGA-C5-A7X5-01A-11D-A36J-09	TCGA-C5-A7X5-10A-01D-A36M-09
CESC	TCGA-C5-A7X8	TCGA-C5-A7X8-01A-11D-A36J-09	TCGA-C5-A7X8-10A-01D-A36M-09
CESC	TCGA-C5-A7XC	TCGA-C5-A7XC-01A-11D-A387-09	TCGA-C5-A7XC-10A-01D-A38A-09
CESC	TCGA-C5-A8XH	TCGA-C5-A8XH-01A-11D-A37N-09	TCGA-C5-A8XH-10A-01D-A37N-09
CESC	TCGA-C5-A8XI	TCGA-C5-A8XI-01A-11D-A37N-09	TCGA-C5-A8XI-10A-01D-A37N-09
CESC	TCGA-C5-A8XJ	TCGA-C5-A8XJ-01A-11D-A37N-09	TCGA-C5-A8XJ-10A-01D-A37N-09
CESC	TCGA-C5-A8XK	TCGA-C5-A8XK-01A-11D-A37N-09	TCGA-C5-A8XK-10A-01D-A37N-09
CESC	TCGA-C5-A8YQ	TCGA-C5-A8YQ-01A-11D-A37N-09	TCGA-C5-A8YQ-10A-01D-A37N-09
CESC	TCGA-C5-A8YR	TCGA-C5-A8YR-01A-12D-A37N-09	TCGA-C5-A8YR-10A-01D-A37N-09
CESC	TCGA-C5-A8YT	TCGA-C5-A8YT-01A-11D-A37N-09	TCGA-C5-A8YT-10A-01D-A37N-09
CESC	TCGA-C5-A8ZZ	TCGA-C5-A8ZZ-01A-11D-A37N-09	TCGA-C5-A8ZZ-10A-01D-A37N-09
CESC	TCGA-C5-A901	TCGA-C5-A901-01A-11D-A37N-09	TCGA-C5-A901-10A-01D-A37N-09
CESC	TCGA-C5-A902	TCGA-C5-A902-01A-11D-A37N-09	TCGA-C5-A902-10A-01D-A37N-09
CESC	TCGA-C5-A905	TCGA-C5-A905-01A-11D-A37N-09	TCGA-C5-A905-10A-01D-A37N-09
CESC	TCGA-C5-A907	TCGA-C5-A907-01A-11D-A37N-09	TCGA-C5-A907-10A-01D-A37N-09
CESC	TCGA-DG-A2KH	TCGA-DG-A2KH-01A-21D-A22X-09	TCGA-DG-A2KH-10A-01D-A22X-09
CESC	TCGA-DG-A2KJ	TCGA-DG-A2KJ-01A-11D-A18J-09	TCGA-DG-A2KJ-10A-01D-A18J-09
CESC	TCGA-DG-A2KK	TCGA-DG-A2KK-01A-11D-A17W-09	TCGA-DG-A2KK-10A-01D-A17W-09
CESC	TCGA-DG-A2KL	TCGA-DG-A2KL-01A-11D-A17W-09	TCGA-DG-A2KL-10A-01D-A17W-09
CESC	TCGA-DG-A2KM	TCGA-DG-A2KM-01A-11D-A17W-09	TCGA-DG-A2KM-10A-01D-A17W-09
CESC	TCGA-DR-A0ZL	TCGA-DR-A0ZL-01A-11D-A10S-08	TCGA-DR-A0ZL-10A-01D-A10S-08
CESC	TCGA-DR-A0ZM	TCGA-DR-A0ZM-01A-12D-A10S-08	TCGA-DR-A0ZM-10A-01D-A10S-08
CESC	TCGA-DS-A0VK	TCGA-DS-A0VK-01A-21D-A10S-08	TCGA-DS-A0VK-10A-01D-A10S-08
CESC	TCGA-DS-A0VL	TCGA-DS-A0VL-01A-21D-A10S-08	TCGA-DS-A0VL-10A-01D-A10S-08
CESC	TCGA-DS-A0VM	TCGA-DS-A0VM-01A-11D-A10S-08	TCGA-DS-A0VM-10A-01D-A10S-08
CESC	TCGA-DS-A0VN	TCGA-DS-A0VN-01A-21D-A10S-08	TCGA-DS-A0VN-10A-01D-A10S-08
CESC	TCGA-DS-A1OA	TCGA-DS-A1OA-01A-11D-A16Y-08	TCGA-DS-A1OA-10A-01D-A16Y-08
CESC	TCGA-DS-A1OB	TCGA-DS-A1OB-01A-11D-A16Y-08	TCGA-DS-A1OB-10A-01D-A14W-08
CESC	TCGA-DS-A1OC	TCGA-DS-A1OC-01A-11D-A14W-08	TCGA-DS-A1OC-10A-01D-A14W-08
CESC	TCGA-DS-A1OD	TCGA-DS-A1OD-01A-11D-A14W-08	TCGA-DS-A1OD-10A-01D-A14W-08
CESC	TCGA-DS-A3LQ	TCGA-DS-A3LQ-01A-21D-A21Q-09	TCGA-DS-A3LQ-10A-01D-A21Q-09
CESC	TCGA-DS-A5RQ	TCGA-DS-A5RQ-01A-11D-A28B-09	TCGA-DS-A5RQ-10A-01D-A28E-09
CESC	TCGA-DS-A7WF	TCGA-DS-A7WF-01A-11D-A351-09	TCGA-DS-A7WF-10A-01D-A351-09
CESC	TCGA-DS-A7WH	TCGA-DS-A7WH-01A-22D-A351-09	TCGA-DS-A7WH-10A-01D-A351-09
CESC	TCGA-DS-A7WI	TCGA-DS-A7WI-01A-12D-A351-09	TCGA-DS-A7WI-10A-01D-A351-09
CESC	TCGA-EA-A1QS	TCGA-EA-A1QS-01A-61D-A22X-09	TCGA-EA-A1QS-10A-01D-A22X-09
CESC	TCGA-EA-A1QT	TCGA-EA-A1QT-01A-11D-A14W-08	TCGA-EA-A1QT-10A-01D-A14W-08
CESC	TCGA-EA-A3HQ	TCGA-EA-A3HQ-01A-11D-A20U-09	TCGA-EA-A3HQ-10A-01D-A20U-09
CESC	TCGA-EA-A3HR	TCGA-EA-A3HR-01A-11D-A20U-09	TCGA-EA-A3HR-10A-01D-A20U-09
CESC	TCGA-EA-A3HS	TCGA-EA-A3HS-01A-11D-A20U-09	TCGA-EA-A3HS-10B-01D-A20U-09
CESC	TCGA-EA-A3HT	TCGA-EA-A3HT-01A-61D-A21Q-09	TCGA-EA-A3HT-10A-01D-A21Q-09
CESC	TCGA-EA-A3HU	TCGA-EA-A3HU-01A-11D-A20U-09	TCGA-EA-A3HU-10B-01D-A20U-09
CESC	TCGA-EA-A3QD	TCGA-EA-A3QD-01A-32D-A22X-09	TCGA-EA-A3QD-10A-01D-A22X-09
CESC	TCGA-EA-A3QE	TCGA-EA-A3QE-01A-21D-A21Q-09	TCGA-EA-A3QE-10A-01D-A21Q-09
CESC	TCGA-EA-A3Y4	TCGA-EA-A3Y4-01A-51D-A243-09	TCGA-EA-A3Y4-10A-01D-A243-09
CESC	TCGA-EA-A410	TCGA-EA-A410-01A-11D-A243-09	TCGA-EA-A410-10A-01D-A243-09
CESC	TCGA-EA-A411	TCGA-EA-A411-01A-11D-A243-09	TCGA-EA-A411-10A-01D-A243-09
CESC	TCGA-EA-A439	TCGA-EA-A439-01A-11D-A243-09	TCGA-EA-A439-10A-01D-A243-09
CESC	TCGA-EA-A43B	TCGA-EA-A43B-01A-81D-A243-09	TCGA-EA-A43B-10A-01D-A243-09
CESC	TCGA-EA-A5FO	TCGA-EA-A5FO-01A-21D-A28B-09	TCGA-EA-A5FO-10A-01D-A28E-09
CESC	TCGA-EA-A5O9	TCGA-EA-A5O9-01A-11D-A28B-09	TCGA-EA-A5O9-10A-01D-A28E-09
CESC	TCGA-EA-A5ZD	TCGA-EA-A5ZD-01A-11D-A28B-09	TCGA-EA-A5ZD-10A-01D-A28E-09
CESC	TCGA-EA-A5ZE	TCGA-EA-A5ZE-01A-11D-A28B-09	TCGA-EA-A5ZE-10A-01D-A28E-09
CESC	TCGA-EA-A5ZF	TCGA-EA-A5ZF-01A-11D-A28B-09	TCGA-EA-A5ZF-10A-01D-A28E-09
CESC	TCGA-EA-A6QX	TCGA-EA-A6QX-01A-12D-A33O-09	TCGA-EA-A6QX-10B-01D-A33O-09
CESC	TCGA-EA-A78R	TCGA-EA-A78R-01A-11D-A32I-09	TCGA-EA-A78R-10A-01D-A32I-09
CESC	TCGA-EA-A97N	TCGA-EA-A97N-01A-11D-A387-09	TCGA-EA-A97N-10A-01D-A38A-09
CESC	TCGA-EK-A2GZ	TCGA-EK-A2GZ-01A-11D-A17W-09	TCGA-EK-A2GZ-10A-01D-A17W-09
CESC	TCGA-EK-A2H0	TCGA-EK-A2H0-01A-11D-A17W-09	TCGA-EK-A2H0-10A-01D-A17W-09
CESC	TCGA-EK-A2H1	TCGA-EK-A2H1-01A-11D-A17W-09	TCGA-EK-A2H1-10A-01D-A17W-09
CESC	TCGA-EK-A2IP	TCGA-EK-A2IP-01A-11D-A17W-09	TCGA-EK-A2IP-10A-01D-A17W-09
CESC	TCGA-EK-A2PG	TCGA-EK-A2PG-01A-11D-A18J-09	TCGA-EK-A2PG-10A-01D-A18J-09
CESC	TCGA-EK-A2PI	TCGA-EK-A2PI-01A-11D-A18J-09	TCGA-EK-A2PI-10A-01D-A18J-09
CESC	TCGA-EK-A2PK	TCGA-EK-A2PK-01A-11D-A18J-09	TCGA-EK-A2PK-10A-01D-A18J-09
CESC	TCGA-EK-A2PL	TCGA-EK-A2PL-01A-11D-A18J-09	TCGA-EK-A2PL-10A-01D-A18J-09
CESC	TCGA-EK-A2PM	TCGA-EK-A2PM-01A-11D-A18J-09	TCGA-EK-A2PM-10A-01D-A18J-09
CESC	TCGA-EK-A2R7	TCGA-EK-A2R7-01A-11D-A18J-09	TCGA-EK-A2R7-10A-01D-A18J-09
CESC	TCGA-EK-A2R8	TCGA-EK-A2R8-01A-21D-A18J-09	TCGA-EK-A2R8-10A-01D-A18J-09
CESC	TCGA-EK-A2R9	TCGA-EK-A2R9-01A-11D-A18J-09	TCGA-EK-A2R9-10A-01D-A18J-09
CESC	TCGA-EK-A2RA	TCGA-EK-A2RA-01A-11D-A18J-09	TCGA-EK-A2RA-10A-01D-A18J-09
CESC	TCGA-EK-A2RB	TCGA-EK-A2RB-01A-11D-A18J-09	TCGA-EK-A2RB-10A-01D-A18J-09
CESC	TCGA-EK-A2RC	TCGA-EK-A2RC-01A-11D-A18J-09	TCGA-EK-A2RC-10A-01D-A18J-09
CESC	TCGA-EK-A2RD	TCGA-EK-A2RD-01A-12D-A20U-09	TCGA-EK-A2RD-10A-01D-A20U-09
CESC	TCGA-EK-A2RE	TCGA-EK-A2RE-01A-11D-A18J-09	TCGA-EK-A2RE-10A-01D-A18J-09
CESC	TCGA-EK-A2RJ	TCGA-EK-A2RJ-01A-11D-A18J-09	TCGA-EK-A2RJ-10A-01D-A18J-09
CESC	TCGA-EK-A2RK	TCGA-EK-A2RK-01A-11D-A18J-09	TCGA-EK-A2RK-10A-01D-A18J-09
CESC	TCGA-EK-A2RL	TCGA-EK-A2RL-01A-11D-A18J-09	TCGA-EK-A2RL-10A-01D-A18J-09
CESC	TCGA-EK-A2RM	TCGA-EK-A2RM-01A-21D-A18J-09	TCGA-EK-A2RM-10A-01D-A18J-09
CESC	TCGA-EK-A2RN	TCGA-EK-A2RN-01A-12D-A20U-09	TCGA-EK-A2RN-10A-01D-A20U-09
CESC	TCGA-EK-A2RO	TCGA-EK-A2RO-01A-11D-A18J-09	TCGA-EK-A2RO-10A-01D-A18J-09
CESC	TCGA-EK-A3GJ	TCGA-EK-A3GJ-01A-21D-A20U-09	TCGA-EK-A3GJ-11A-11D-A20U-09
CESC	TCGA-EK-A3GK	TCGA-EK-A3GK-01A-11D-A20U-09	TCGA-EK-A3GK-10A-01D-A20U-09
CESC	TCGA-EK-A3GM	TCGA-EK-A3GM-01A-11D-A20U-09	TCGA-EK-A3GM-10A-01D-A20U-09
CESC	TCGA-EK-A3GN	TCGA-EK-A3GN-01A-11D-A20U-09	TCGA-EK-A3GN-10A-01D-A20U-09
CESC	TCGA-EX-A1H5	TCGA-EX-A1H5-01A-31D-A13W-08	TCGA-EX-A1H5-10A-01D-A13W-08
CESC	TCGA-EX-A1H6	TCGA-EX-A1H6-01B-11D-A22X-09	TCGA-EX-A1H6-10A-01D-A22X-09
CESC	TCGA-EX-A3L1	TCGA-EX-A3L1-01A-11D-A21Q-09	TCGA-EX-A3L1-10A-01D-A21Q-09
CESC	TCGA-EX-A449	TCGA-EX-A449-01A-11D-A243-09	TCGA-EX-A449-10A-01D-A243-09
CESC	TCGA-EX-A69L	TCGA-EX-A69L-01A-11D-A32I-09	TCGA-EX-A69L-10A-01D-A32I-09
CESC	TCGA-EX-A69M	TCGA-EX-A69M-01A-11D-A32I-09	TCGA-EX-A69M-10A-01D-A32I-09
CESC	TCGA-EX-A8YF	TCGA-EX-A8YF-01A-11D-A37N-09	TCGA-EX-A8YF-10A-01D-A37N-09
CESC	TCGA-FU-A23K	TCGA-FU-A23K-01A-11D-A16O-08	TCGA-FU-A23K-10A-01D-A16O-08
CESC	TCGA-FU-A23L	TCGA-FU-A23L-01A-11D-A16O-08	TCGA-FU-A23L-10A-01D-A16O-08
CESC	TCGA-FU-A2QG	TCGA-FU-A2QG-01A-11D-A18J-09	TCGA-FU-A2QG-10A-01D-A18J-09
CESC	TCGA-FU-A3EO	TCGA-FU-A3EO-01A-11D-A20U-09	TCGA-FU-A3EO-11A-13D-A20U-09
CESC	TCGA-FU-A3HY	TCGA-FU-A3HY-01A-11D-A21Q-09	TCGA-FU-A3HY-10A-01D-A21Q-09
CESC	TCGA-FU-A3HZ	TCGA-FU-A3HZ-01A-11D-A20U-09	TCGA-FU-A3HZ-10A-01D-A20U-09
CESC	TCGA-FU-A3NI	TCGA-FU-A3NI-01A-11D-A21Q-09	TCGA-FU-A3NI-10A-01D-A21Q-09
CESC	TCGA-FU-A3TQ	TCGA-FU-A3TQ-01A-11D-A22X-09	TCGA-FU-A3TQ-10A-01D-A22X-09
CESC	TCGA-FU-A3TX	TCGA-FU-A3TX-01A-11D-A22X-09	TCGA-FU-A3TX-10A-01D-A22X-09
CESC	TCGA-FU-A3WB	TCGA-FU-A3WB-01A-11D-A22X-09	TCGA-FU-A3WB-10A-01D-A22X-09
CESC	TCGA-FU-A3YQ	TCGA-FU-A3YQ-01A-11D-A22X-09	TCGA-FU-A3YQ-10A-01D-A22X-09
CESC	TCGA-FU-A40J	TCGA-FU-A40J-01A-11D-A243-09	TCGA-FU-A40J-10A-01D-A243-09
CESC	TCGA-FU-A57G	TCGA-FU-A5XV-01A-11D-A28B-09	TCGA-FU-A5XV-10A-01D-A28E-09
CESC	TCGA-FU-A5XV	TCGA-FU-A770-01A-11D-A33O-09	TCGA-FU-A770-10A-01D-A33O-09
CESC	TCGA-FU-A770	TCGA-FU-A770-01A-11D-A33O-09	TCGA-FU-A770-10A-01D-A33O-09
CESC	TCGA-GH-A9DA	TCGA-GH-A9DA-01A-21D-A37N-09	TCGA-GH-A9DA-10A-01D-A37N-09
CESC	TCGA-HG-A2PA	TCGA-HG-A2PA-01A-11D-A20U-09	TCGA-HG-A2PA-10B-01D-A20U-09
CESC	TCGA-HG-A9SC	TCGA-HG-A9SC-01A-21D-A42O-09	TCGA-HG-A9SC-10A-01D-A42R-09
CESC	TCGA-HM-A3JJ	TCGA-HM-A3JJ-01A-21D-A21Q-09	TCGA-HM-A3JJ-10A-01D-A21Q-09
CESC	TCGA-HM-A3JK	TCGA-HM-A3JK-01A-11D-A21Q-09	TCGA-HM-A3JK-10A-01D-A21Q-09
CESC	TCGA-HM-A6W2	TCGA-HM-A6W2-01A-21D-A33O-09	TCGA-HM-A6W2-10A-01D-A33O-09
CESC	TCGA-IR-A3L7	TCGA-IR-A3L7-01A-21D-A20U-09	TCGA-IR-A3L7-10A-01D-A20U-09
CESC	TCGA-IR-A3LA	TCGA-IR-A3LA-01A-11D-A22X-09	TCGA-IR-A3LA-10A-01D-A22X-09
CESC	TCGA-IR-A3LB	TCGA-IR-A3LB-01A-11D-A243-09	TCGA-IR-A3LB-10A-01D-A243-09
CESC	TCGA-IR-A3LC	TCGA-IR-A3LC-01A-11D-A20U-09	TCGA-IR-A3LC-10A-01D-A20U-09
CESC	TCGA-IR-A3LF	TCGA-IR-A3LF-01A-21D-A22X-09	TCGA-IR-A3LF-10A-01D-A22X-09
CESC	TCGA-IR-A3LH	TCGA-IR-A3LH-01A-21D-A20U-09	TCGA-IR-A3LH-10A-01D-A20U-09
CESC	TCGA-IR-A3LI	TCGA-IR-A3LI-01A-11D-A20U-09	TCGA-IR-A3LI-10A-01D-A20U-09
CESC	TCGA-IR-A3LK	TCGA-IR-A3LK-01A-12D-A20U-09	TCGA-IR-A3LK-10A-01D-A20U-09
CESC	TCGA-IR-A3LL	TCGA-IR-A3LL-01A-11D-A20U-09	TCGA-IR-A3LL-10A-01D-A20U-09
CESC	TCGA-JW-A5VG	TCGA-JW-A5VG-01A-11D-A28B-09	TCGA-JW-A5VG-10A-01D-A28E-09
CESC	TCGA-JW-A5VH	TCGA-JW-A5VH-01A-11D-A28B-09	TCGA-JW-A5VH-10A-01D-A28E-09
CESC	TCGA-JW-A5VI	TCGA-JW-A5VI-01A-11D-A28B-09	TCGA-JW-A5VI-10A-01D-A28E-09
CESC	TCGA-JW-A5VJ	TCGA-JW-A5VJ-01A-11D-A28B-09	TCGA-JW-A5VJ-10A-01D-A28E-09
CESC	TCGA-JW-A5VK	TCGA-JW-A5VK-01A-11D-A28B-09	TCGA-JW-A5VK-10A-01D-A28E-09
CESC	TCGA-JW-A5VL	TCGA-JW-A5VL-01A-11D-A28B-09	TCGA-JW-A5VL-10A-01D-A28E-09
CESC	TCGA-JW-A69B	TCGA-JW-A69B-01A-11D-A32I-09	TCGA-JW-A69B-10A-01D-A32I-09
CESC	TCGA-JW-A852	TCGA-JW-A852-01A-11D-A351-09	TCGA-JW-A852-10A-01D-A351-09
CESC	TCGA-JW-AAVH	TCGA-JW-AAVH-01A-11D-A387-09	TCGA-JW-AAVH-10A-01D-A38A-09
CESC	TCGA-JX-A3PZ	TCGA-JX-A3PZ-01A-11D-A21Q-09	TCGA-JX-A3PZ-10A-01D-A21Q-09
CESC	TCGA-JX-A3Q0	TCGA-JX-A3Q0-01A-11D-A21Q-09	TCGA-JX-A3Q0-10A-01D-A21Q-09
CESC	TCGA-JX-A3Q8	TCGA-JX-A3Q8-01A-11D-A21Q-09	TCGA-JX-A3Q8-10A-01D-A21Q-09
CESC	TCGA-JX-A5QV	TCGA-JX-A5QV-01A-22D-A28B-09	TCGA-JX-A5QV-10A-01D-A28E-09
CESC	TCGA-LP-A4AU	TCGA-LP-A4AU-01A-32D-A243-09	TCGA-LP-A4AU-10A-01D-A243-09
CESC	TCGA-LP-A4AV	TCGA-LP-A4AV-01A-11D-A243-09	TCGA-LP-A4AV-10A-01D-A243-09
CESC	TCGA-LP-A4AW	TCGA-LP-A4AW-01A-11D-A243-09	TCGA-LP-A4AW-10A-01D-A243-09
CESC	TCGA-LP-A4AX	TCGA-LP-A4AX-01A-12D-A243-09	TCGA-LP-A4AX-10A-01D-A243-09
CESC	TCGA-LP-A5U2	TCGA-LP-A5U2-01A-11D-A28B-09	TCGA-LP-A5U2-10A-01D-A28E-09
CESC	TCGA-LP-A5U3	TCGA-LP-A5U3-01A-11D-A28B-09	TCGA-LP-A5U3-10A-01D-A28E-09
CESC	TCGA-LP-A7HU	TCGA-LP-A7HU-01A-11D-A33O-09	TCGA-LP-A7HU-10A-01D-A33O-09
CESC	TCGA-MA-AA3W	TCGA-MA-AA3W-01A-11D-A387-09	TCGA-MA-AA3W-10A-01D-A38A-09
CESC	TCGA-MA-AA3X	TCGA-MA-AA3X-01A-22D-A42O-09	TCGA-MA-AA3X-10A-01D-A42R-09
CESC	TCGA-MA-AA3Y	TCGA-MA-AA3Y-01A-11D-A387-09	TCGA-MA-AA3Y-10A-01D-A38A-09
CESC	TCGA-MA-AA3Z	TCGA-MA-AA3Z-01A-11D-A387-09	TCGA-MA-AA3Z-10A-01D-A38A-09
CESC	TCGA-MA-AA41	TCGA-MA-AA41-01A-11D-A387-09	TCGA-MA-AA41-10A-01D-A38A-09
CESC	TCGA-MA-AA42	TCGA-MA-AA42-01A-12D-A387-09	TCGA-MA-AA42-10A-01D-A38A-09
CESC	TCGA-MA-AA43	TCGA-MA-AA43-01A-11D-A42O-09	TCGA-MA-AA43-10A-01D-A45U-09
CESC	TCGA-MU-A5YI	TCGA-MU-A5YI-01A-11D-A32I-09	TCGA-MU-A5YI-10A-01D-A32I-09
CESC	TCGA-MU-A8JM	TCGA-MU-A8JM-01A-11D-A36J-09	TCGA-MU-A8JM-10A-01D-A36M-09
CESC	TCGA-MY-A913	TCGA-MY-A913-01A-11D-A37N-09	TCGA-MY-A913-10A-01D-A37N-09
CESC	TCGA-PN-A8MA	TCGA-PN-A8MA-01A-11D-A36J-09	TCGA-PN-A8MA-10A-01D-A36M-09
CESC	TCGA-Q1-A5R1	TCGA-Q1-A5R1-01A-11D-A28B-09	TCGA-Q1-A5R1-10A-01D-A28E-09
CESC	TCGA-Q1-A5R2	TCGA-Q1-A5R2-01A-11D-A28B-09	TCGA-Q1-A5R2-10A-01D-A28E-09
CESC	TCGA-Q1-A5R3	TCGA-Q1-A5R3-01A-11D-A28B-09	TCGA-Q1-A5R3-10B-01D-A28E-09
CESC	TCGA-Q1-A6DT	TCGA-Q1-A6DT-01A-11D-A32I-09	TCGA-Q1-A6DT-10A-01D-A32I-09
CESC	TCGA-Q1-A6DV	TCGA-Q1-A6DV-01A-11D-A32I-09	TCGA-Q1-A6DV-10A-01D-A32I-09
CESC	TCGA-Q1-A6DW	TCGA-Q1-A6DW-01A-11D-A32I-09	TCGA-Q1-A6DW-10B-01D-A32I-09
CESC	TCGA-Q1-A73O	TCGA-Q1-A73O-01A-11D-A32I-09	TCGA-Q1-A73O-10B-01D-A32I-09
CESC	TCGA-Q1-A73P	TCGA-Q1-A73P-01A-11D-A32I-09	TCGA-Q1-A73P-10B-01D-A32I-09
CESC	TCGA-Q1-A73Q	TCGA-Q1-A73Q-01A-21D-A32I-09	TCGA-Q1-A73Q-10B-01D-A32I-09
CESC	TCGA-Q1-A73R	TCGA-Q1-A73R-01A-11D-A33O-09	TCGA-Q1-A73R-10B-01D-A33O-09
CESC	TCGA-Q1-A73S	TCGA-Q1-A73S-01A-11D-A33O-09	TCGA-Q1-A73S-10B-01D-A33O-09
CESC	TCGA-R2-A69V	TCGA-R2-A69V-01A-11D-A32I-09	TCGA-R2-A69V-10A-01D-A32I-09
CESC	TCGA-RA-A741	TCGA-RA-A741-01A-11D-A33O-09	TCGA-RA-A741-10B-01D-A33O-09
CESC	TCGA-UC-A7PD	TCGA-UC-A7PD-01A-11D-A351-09	TCGA-UC-A7PD-11A-12D-A351-09
CESC	TCGA-UC-A7PF	TCGA-UC-A7PF-01A-11D-A351-09	TCGA-UC-A7PF-11A-31D-A351-09
CESC	TCGA-UC-A7PG	TCGA-UC-A7PG-01A-11D-A42O-09	TCGA-UC-A7PG-11C-11D-A42R-09
CESC	TCGA-UC-A7PI	TCGA-UC-A7PI-01A-11D-A42O-09	TCGA-UC-A7PI-10A-01D-A42R-09
CESC	TCGA-VS-A8EB	TCGA-VS-A8EB-01A-11D-A36J-09	TCGA-VS-A8EB-10A-01D-A36M-09
CESC	TCGA-VS-A8EC	TCGA-VS-A8EC-01A-11D-A36J-09	TCGA-VS-A8EC-10A-01D-A36M-09
CESC	TCGA-VS-A8EG	TCGA-VS-A8EG-01A-11D-A36J-09	TCGA-VS-A8EG-10A-01D-A36M-09
CESC	TCGA-VS-A8EH	TCGA-VS-A8EH-01A-11D-A36J-09	TCGA-VS-A8EH-10A-01D-A36M-09
CESC	TCGA-VS-A8EI	TCGA-VS-A8EI-01A-11D-A37N-09	TCGA-VS-A8EI-10A-01D-A37N-09
CESC	TCGA-VS-A8EJ	TCGA-VS-A8EJ-01A-11D-A37N-09	TCGA-VS-A8EJ-10A-01D-A37N-09
CESC	TCGA-VS-A8EK	TCGA-VS-A8EK-01A-12D-A37N-09	TCGA-VS-A8EK-10A-01D-A37N-09
CESC	TCGA-VS-A8EL	TCGA-VS-A8EL-01A-11D-A37N-09	TCGA-VS-A8EL-10A-01D-A37N-09
CESC	TCGA-VS-A8Q8	TCGA-VS-A8Q8-01A-11D-A37N-09	TCGA-VS-A8Q8-10A-01D-A37N-09
CESC	TCGA-VS-A8Q9	TCGA-VS-A8Q9-01A-12D-A37N-09	TCGA-VS-A8Q9-10A-01D-A37N-09
CESC	TCGA-VS-A8QA	TCGA-VS-A8QA-01A-11D-A37N-09	TCGA-VS-A8QA-10A-01D-A37N-09
CESC	TCGA-VS-A8QC	TCGA-VS-A8QC-01A-11D-A37N-09	TCGA-VS-A8QC-10A-01D-A37N-09
CESC	TCGA-VS-A8QF	TCGA-VS-A8QF-01A-21D-A37N-09	TCGA-VS-A8QF-10A-01D-A37N-09
CESC	TCGA-VS-A8QH	TCGA-VS-A8QH-01A-11D-A37N-09	TCGA-VS-A8QH-10A-01D-A37N-09
CESC	TCGA-VS-A8QM	TCGA-VS-A8QM-01A-11D-A37N-09	TCGA-VS-A8QM-10A-01D-A37N-09
CESC	TCGA-VS-A94W	TCGA-VS-A94W-01A-12D-A37N-09	TCGA-VS-A94W-10A-01D-A37N-09
CESC	TCGA-VS-A94X	TCGA-VS-A94X-01A-11D-A387-09	TCGA-VS-A94X-10A-01D-A38A-09
CESC	TCGA-VS-A94Y	TCGA-VS-A94Y-01A-11D-A387-09	TCGA-VS-A94Y-10A-01D-A38A-09
CESC	TCGA-VS-A94Z	TCGA-VS-A94Z-01A-11D-A387-09	TCGA-VS-A94Z-10A-01D-A38A-09
CESC	TCGA-VS-A950	TCGA-VS-A950-01A-11D-A42O-09	TCGA-VS-A950-10B-01D-A42R-09
CESC	TCGA-VS-A952	TCGA-VS-A952-01A-11D-A387-09	TCGA-VS-A952-10A-01D-A38A-09
CESC	TCGA-VS-A953	TCGA-VS-A953-01A-11D-A387-09	TCGA-VS-A953-10A-01D-A38A-09
CESC	TCGA-VS-A954	TCGA-VS-A954-01A-11D-A387-09	TCGA-VS-A954-10A-01D-A38A-09
CESC	TCGA-VS-A957	TCGA-VS-A957-01A-11D-A42O-09	TCGA-VS-A957-10A-01D-A42R-09
CESC	TCGA-VS-A958	TCGA-VS-A958-01A-11D-A42O-09	TCGA-VS-A958-10A-01D-A42R-09
CESC	TCGA-VS-A959	TCGA-VS-A959-01A-11D-A42O-09	TCGA-VS-A959-10A-01D-A42R-09
CESC	TCGA-VS-A9U5	TCGA-VS-A9U5-01A-11D-A42O-09	TCGA-VS-A9U5-10A-01D-A42R-09
CESC	TCGA-VS-A9U6	TCGA-VS-A9U6-01A-11D-A42O-09	TCGA-VS-A9U6-10A-01D-A42R-09
CESC	TCGA-VS-A9U7	TCGA-VS-A9U7-01A-11D-A42O-09	TCGA-VS-A9U7-10A-01D-A42R-09
CESC	TCGA-VS-A9UA	TCGA-VS-A9UA-01A-11D-A42O-09	TCGA-VS-A9UA-10A-01D-A42R-09
CESC	TCGA-VS-A9UB	TCGA-VS-A9UB-01A-22D-A42O-09	TCGA-VS-A9UB-10A-01D-A42R-09
CESC	TCGA-VS-A9UC	TCGA-VS-A9UC-01A-11D-A42O-09	TCGA-VS-A9UC-10A-01D-A42R-09
CESC	TCGA-VS-A9UD	TCGA-VS-A9UD-01A-11D-A42O-09	TCGA-VS-A9UD-10A-01D-A42R-09
CESC	TCGA-VS-A9UH	TCGA-VS-A9UH-01A-11D-A42O-09	TCGA-VS-A9UH-10A-01D-A42R-09
CESC	TCGA-VS-A9UI	TCGA-VS-A9UI-01A-11D-A42O-09	TCGA-VS-A9UI-10A-01D-A42R-09
CESC	TCGA-VS-A9UJ	TCGA-VS-A9UJ-01A-11D-A42O-09	TCGA-VS-A9UJ-10A-01D-A42R-09
CESC	TCGA-VS-A9UL	TCGA-VS-A9UL-01A-11D-A42O-09	TCGA-VS-A9UL-10A-01D-A42R-09
CESC	TCGA-VS-A9UM	TCGA-VS-A9UM-01A-11D-A42O-09	TCGA-VS-A9UM-10A-01D-A42R-09
CESC	TCGA-VS-A9UO	TCGA-VS-A9UO-01A-11D-A42O-09	TCGA-VS-A9UO-10A-01D-A42R-09
CESC	TCGA-VS-A9UP	TCGA-VS-A9UP-01A-11D-A42O-09	TCGA-VS-A9UP-10A-01D-A42R-09
CESC	TCGA-VS-A9UQ	TCGA-VS-A9UQ-01A-21D-A42O-09	TCGA-VS-A9UQ-10A-01D-A42R-09
CESC	TCGA-VS-A9UR	TCGA-VS-A9UR-01A-11D-A42O-09	TCGA-VS-A9UR-10A-01D-A42R-09
CESC	TCGA-VS-A9UT	TCGA-VS-A9UT-01A-11D-A42O-09	TCGA-VS-A9UT-10A-01D-A42R-09
CESC	TCGA-VS-A9UU	TCGA-VS-A9UU-01A-11D-A42O-09	TCGA-VS-A9UU-10B-01D-A42R-09
CESC	TCGA-VS-A9UV	TCGA-VS-A9UV-01A-11D-A42O-09	TCGA-VS-A9UV-10A-01D-A42R-09
CESC	TCGA-VS-A9UY	TCGA-VS-A9UY-01A-11D-A42O-09	TCGA-VS-A9UY-10A-01D-A42R-09
CESC	TCGA-VS-A9UZ	TCGA-VS-A9UZ-01A-11D-A42O-09	TCGA-VS-A9UZ-10A-01D-A42R-09
CESC	TCGA-VS-A9V0	TCGA-VS-A9V0-01A-11D-A42O-09	TCGA-VS-A9V0-10A-01D-A42R-09
CESC	TCGA-VS-A9V1	TCGA-VS-A9V1-01A-11D-A42O-09	TCGA-VS-A9V1-10A-01D-A42R-09
CESC	TCGA-VS-A9V2	TCGA-VS-A9V2-01A-11D-A42O-09	TCGA-VS-A9V2-10A-01D-A42R-09
CESC	TCGA-VS-A9V3	TCGA-VS-A9V3-01A-11D-A42O-09	TCGA-VS-A9V3-10A-01D-A42R-09
CESC	TCGA-VS-A9V4	TCGA-VS-A9V4-01A-12D-A42O-09	TCGA-VS-A9V4-10A-01D-A42R-09
CESC	TCGA-VS-A9V5	TCGA-VS-A9V5-01A-11D-A42O-09	TCGA-VS-A9V5-10A-01D-A42R-09
CESC	TCGA-VS-AA62	TCGA-VS-AA62-01A-11D-A42O-09	TCGA-VS-AA62-10A-01D-A42R-09
CESC	TCGA-WL-A834	TCGA-WL-A834-01A-11D-A351-09	TCGA-WL-A834-10A-01D-A351-09
CESC	TCGA-XS-A8TJ	TCGA-XS-A8TJ-01A-11D-A36J-09	TCGA-XS-A8TJ-10A-01D-A36M-09
CESC	TCGA-ZJ-A8QO	TCGA-ZJ-A8QO-01A-11D-A37N-09	TCGA-ZJ-A8QO-10A-01D-A37N-09
CESC	TCGA-ZJ-A8QR	TCGA-ZJ-A8QR-01A-11D-A37N-09	TCGA-ZJ-A8QR-10A-01D-A37N-09
CESC	TCGA-ZJ-AAX4	TCGA-ZJ-AAX4-01A-11D-A42O-09	TCGA-ZJ-AAX4-10B-01D-A42R-09
CESC	TCGA-ZJ-AAX8	TCGA-ZJ-AAX8-01A-11D-A42O-09	TCGA-ZJ-AAX8-10A-01D-A42R-09
CESC	TCGA-ZJ-AAXA	TCGA-ZJ-AAXA-01A-11D-A42O-09	TCGA-ZJ-AAXA-10A-01D-A42R-09
CESC	TCGA-ZJ-AAXB	TCGA-ZJ-AAXB-01A-11D-A42O-09	TCGA-ZJ-AAXB-10A-01D-A42R-09
CESC	TCGA-ZJ-AAXD	TCGA-ZJ-AAXD-01A-21D-A42O-09	TCGA-ZJ-AAXD-10A-01D-A42R-09
CESC	TCGA-ZJ-AAXF	TCGA-ZJ-AAXF-01A-31D-A42O-09	TCGA-ZJ-AAXF-10A-01D-A42R-09
CESC	TCGA-ZJ-AAXI	TCGA-ZJ-AAXI-01A-11D-A42O-09	TCGA-ZJ-AAXI-10A-01D-A42R-09
CESC	TCGA-ZJ-AAXJ	TCGA-ZJ-AAXJ-01A-11D-A42O-09	TCGA-ZJ-AAXJ-10A-01D-A42R-09
CESC	TCGA-ZJ-AAXN	TCGA-ZJ-AAXN-01A-11D-A42O-09	TCGA-ZJ-AAXN-10A-01D-A42R-09
CESC	TCGA-ZJ-AAXT	TCGA-ZJ-AAXT-01A-11D-A42O-09	TCGA-ZJ-AAXT-10A-01D-A42R-09
CESC	TCGA-ZJ-AAXU	TCGA-ZJ-AAXU-01A-11D-A42O-09	TCGA-ZJ-AAXU-10A-01D-A42R-09
CESC	TCGA-ZJ-AB0H	TCGA-ZJ-AB0H-01A-11D-A42O-09	TCGA-ZJ-AB0H-10A-01D-A42R-09
CESC	TCGA-ZJ-AB0I	TCGA-ZJ-AB0I-01A-11D-A42O-09	TCGA-ZJ-AB0I-10A-01D-A42R-09
CESC	TCGA-ZX-AA5X	TCGA-ZX-AA5X-01A-11D-A42O-09	TCGA-ZX-AA5X-10A-01D-A42R-09

## Sheet: CHOL
TCGA Cancer type	CDR list	Tumor_Sample_Barcode	Matched_Norm_Sample_Barcode
CHOL	TCGA-3X-AAV9	TCGA-3X-AAV9-01A-72D-A417-09	TCGA-3X-AAV9-10A-01D-A41A-09
CHOL	TCGA-3X-AAVA	TCGA-3X-AAVA-01A-11D-A417-09	TCGA-3X-AAVA-10A-01D-A41A-09
CHOL	TCGA-3X-AAVB	TCGA-3X-AAVB-01A-31D-A417-09	TCGA-3X-AAVB-10A-01D-A41A-09
CHOL	TCGA-3X-AAVC	TCGA-3X-AAVC-01A-21D-A417-09	TCGA-3X-AAVC-10A-01D-A41A-09
CHOL	TCGA-3X-AAVE	TCGA-3X-AAVE-01A-11D-A417-09	TCGA-3X-AAVE-10A-01D-A41A-09
CHOL	TCGA-4G-AAZO	TCGA-4G-AAZO-01A-12D-A417-09	TCGA-4G-AAZO-11A-11D-A41A-09
CHOL	TCGA-4G-AAZT	TCGA-4G-AAZT-01A-11D-A417-09	TCGA-4G-AAZT-10A-01D-A41A-09
CHOL	TCGA-W5-AA2G	TCGA-W5-AA2G-01A-11D-A417-09	TCGA-W5-AA2G-10A-01D-A41A-09
CHOL	TCGA-W5-AA2H	TCGA-W5-AA2H-01A-31D-A417-09	TCGA-W5-AA2H-10A-01D-A41A-09
CHOL	TCGA-W5-AA2I	TCGA-W5-AA2I-01A-32D-A417-09	TCGA-W5-AA2I-10A-01D-A41A-09
CHOL	TCGA-W5-AA2O	TCGA-W5-AA2O-01A-11D-A417-09	TCGA-W5-AA2O-10A-01D-A41A-09
CHOL	TCGA-W5-AA2Q	TCGA-W5-AA2Q-01A-11D-A417-09	TCGA-W5-AA2Q-10A-01D-A41A-09
CHOL	TCGA-W5-AA2R	TCGA-W5-AA2R-01A-11D-A417-09	TCGA-W5-AA2R-10A-01D-A41A-09
CHOL	TCGA-W5-AA2T	TCGA-W5-AA2T-01A-12D-A417-09	TCGA-W5-AA2T-10A-01D-A41A-09
CHOL	TCGA-W5-AA2U	TCGA-W5-AA2U-01A-11D-A417-09	TCGA-W5-AA2U-10A-01D-A41A-09
CHOL	TCGA-W5-AA2W	TCGA-W5-AA2W-01A-11D-A417-09	TCGA-W5-AA2W-10A-01D-A41A-09
CHOL	TCGA-W5-AA2X	TCGA-W5-AA2X-01A-11D-A417-09	TCGA-W5-AA2X-10A-01D-A41A-09
CHOL	TCGA-W5-AA2Z	TCGA-W5-AA2Z-01A-11D-A417-09	TCGA-W5-AA2Z-11A-11D-A41A-09
CHOL	TCGA-W5-AA30	TCGA-W5-AA30-01A-31D-A417-09	TCGA-W5-AA30-10A-01D-A41A-09
CHOL	TCGA-W5-AA31	TCGA-W5-AA31-01A-11D-A417-09	TCGA-W5-AA31-10A-01D-A41A-09
CHOL	TCGA-W5-AA33	TCGA-W5-AA33-01A-11D-A417-09	TCGA-W5-AA33-10A-01D-A41A-09
CHOL	TCGA-W5-AA34	TCGA-W5-AA34-01A-11D-A417-09	TCGA-W5-AA34-10A-01D-A41A-09
CHOL	TCGA-W5-AA36	TCGA-W5-AA36-01A-11D-A417-09	TCGA-W5-AA36-10A-01D-A41A-09
CHOL	TCGA-W5-AA38	TCGA-W5-AA38-01A-11D-A417-09	TCGA-W5-AA38-10A-01D-A41A-09
CHOL	TCGA-W5-AA39	TCGA-W5-AA39-01A-11D-A417-09	TCGA-W5-AA39-10A-01D-A41A-09
CHOL	TCGA-W6-AA0S	TCGA-W6-AA0S-01A-11D-A417-09	TCGA-W6-AA0S-10A-01D-A41A-09
CHOL	TCGA-WD-A7RX	TCGA-WD-A7RX-01A-12D-A417-09	TCGA-WD-A7RX-10A-01D-A41A-09
CHOL	TCGA-YR-A95A	TCGA-YR-A95A-01A-12D-A417-09	TCGA-YR-A95A-10A-01D-A41A-09
CHOL	TCGA-ZD-A8I3	TCGA-ZD-A8I3-01A-11D-A417-09	TCGA-ZD-A8I3-10A-01D-A41A-09
CHOL	TCGA-ZH-A8Y1	TCGA-ZH-A8Y1-01A-11D-A417-09	TCGA-ZH-A8Y1-10A-01D-A41A-09
CHOL	TCGA-ZH-A8Y2	TCGA-ZH-A8Y2-01A-11D-A417-09	TCGA-ZH-A8Y2-10A-01D-A41A-09
CHOL	TCGA-ZH-A8Y4	TCGA-ZH-A8Y4-01A-11D-A417-09	TCGA-ZH-A8Y4-10A-01D-A41A-09
CHOL	TCGA-ZH-A8Y5	TCGA-ZH-A8Y5-01A-11D-A417-09	TCGA-ZH-A8Y5-10A-01D-A41A-09
CHOL	TCGA-ZH-A8Y6	TCGA-ZH-A8Y6-01A-11D-A417-09	TCGA-ZH-A8Y6-10A-01D-A41A-09
CHOL	TCGA-ZH-A8Y8	TCGA-ZH-A8Y8-01A-51D-A417-09	TCGA-ZH-A8Y8-10A-01D-A41A-09
CHOL	TCGA-ZU-A8S4	TCGA-ZU-A8S4-01A-11D-A417-09	TCGA-ZU-A8S4-10A-01D-A41A-09

## Sheet: COAD
TCGA Cancer type	list	Tumor_Sample_Barcode	Matched_Norm_Sample_Barcode
COAD	TCGA-3L-AA1B	TCGA-3L-AA1B-01A-11D-A36X-10	TCGA-3L-AA1B-10A-01D-A370-10
COAD	TCGA-4N-A93T	TCGA-4N-A93T-01A-11D-A36X-10	TCGA-4N-A93T-10A-01D-A370-10
COAD	TCGA-4T-AA8H	TCGA-4T-AA8H-01A-11D-A40P-10	TCGA-4T-AA8H-10B-01D-A40P-10
COAD	TCGA-5M-AAT4	TCGA-5M-AAT4-01A-11D-A40P-10	TCGA-5M-AAT4-10A-01D-A40P-10
COAD		TCGA-5M-AAT5-01A-21D-A40P-10	TCGA-5M-AAT5-10A-01D-A40P-10
COAD	TCGA-5M-AAT6	TCGA-5M-AAT6-01A-11D-A40P-10	TCGA-5M-AAT6-10A-01D-A40P-10
COAD		TCGA-5M-AATA-01A-31D-A40P-10	TCGA-5M-AATA-10A-01D-A40P-10
COAD	TCGA-5M-AATE	TCGA-5M-AATE-01A-11D-A40P-10	TCGA-5M-AATE-10A-01D-A40P-10
COAD	TCGA-A6-2671	TCGA-A6-2671-01A-01D-1408-10	TCGA-A6-2671-10A-01D-1408-10
COAD	TCGA-A6-2674	TCGA-A6-2674-01A-02D-A270-10	TCGA-A6-2674-10A-01D-A270-10
COAD	TCGA-A6-2675	TCGA-A6-2675-01A-02D-1719-10	TCGA-A6-2675-10A-01D-1719-10
COAD	TCGA-A6-2677	TCGA-A6-2677-01A-01D-A270-10	TCGA-A6-2677-10A-01D-A270-10
COAD	TCGA-A6-2678	TCGA-A6-2678-01A-01D-1953-10	TCGA-A6-2678-11A-01D-1554-10
COAD	TCGA-A6-2681	TCGA-A6-2681-01A-01D-1408-10	TCGA-A6-2681-10A-01D-2188-10
COAD	TCGA-A6-2683	TCGA-A6-2683-01A-01D-1953-10	TCGA-A6-2683-10A-01D-1953-10
COAD	TCGA-A6-2684	TCGA-A6-2684-01A-01D-A270-10	TCGA-A6-2684-10A-01D-A270-10
COAD	TCGA-A6-2685	TCGA-A6-2685-01A-01D-1408-10	TCGA-A6-2685-11A-01D-1554-10
COAD	TCGA-A6-2686	TCGA-A6-2686-01A-01D-1408-10	TCGA-A6-2686-10A-01D-2188-10
COAD	TCGA-A6-3807	TCGA-A6-3807-01A-01W-0995-10	TCGA-A6-3807-11A-01W-0995-10
COAD	TCGA-A6-3808	TCGA-A6-3808-01A-01W-0995-10	TCGA-A6-3808-10A-01D-1459-10
COAD	TCGA-A6-3809	TCGA-A6-3809-01A-01D-A270-10	TCGA-A6-3809-10A-01D-A270-10
COAD	TCGA-A6-3810	TCGA-A6-3810-01A-01D-A270-10	TCGA-A6-3810-10A-01D-A270-10
COAD	TCGA-A6-4105	TCGA-A6-4105-01A-02D-1771-10	TCGA-A6-4105-10A-01D-1771-10
COAD	TCGA-A6-4107	TCGA-A6-4107-01A-02D-1408-10	TCGA-A6-4107-10A-01D-2188-10
COAD	TCGA-A6-5656	TCGA-A6-5656-01A-21D-A270-10	TCGA-A6-5656-10A-01D-A270-10
COAD	TCGA-A6-5657	TCGA-A6-5657-01A-01D-1650-10	TCGA-A6-5657-10A-01D-1650-10
COAD	TCGA-A6-5659	TCGA-A6-5659-01A-01D-A270-10	TCGA-A6-5659-10A-01D-A270-10
COAD	TCGA-A6-5660	TCGA-A6-5660-01A-01D-1650-10	TCGA-A6-5660-10A-01D-1650-10
COAD	TCGA-A6-5661	TCGA-A6-5661-01A-01D-1650-10	TCGA-A6-5661-10A-01D-1650-10
COAD	TCGA-A6-5662	TCGA-A6-5662-01A-01D-1650-10	TCGA-A6-5662-11A-01D-1650-10
COAD	TCGA-A6-5664	TCGA-A6-5664-01A-21D-1835-10	TCGA-A6-5664-10A-01D-1835-10
COAD	TCGA-A6-5665	TCGA-A6-5665-01A-01D-1650-10	TCGA-A6-5665-10A-01D-1650-10
COAD	TCGA-A6-5666	TCGA-A6-5666-01A-01D-1650-10	TCGA-A6-5666-10A-01D-1650-10
COAD	TCGA-A6-5667	TCGA-A6-5667-01A-21D-1719-10	TCGA-A6-5667-10A-01D-1719-10
COAD	TCGA-A6-6137	TCGA-A6-6137-01A-11D-1771-10	TCGA-A6-6137-10A-01D-1806-10
COAD	TCGA-A6-6138	TCGA-A6-6138-01A-11D-1771-10	TCGA-A6-6138-10A-01D-1771-10
COAD	TCGA-A6-6142	TCGA-A6-6142-01A-11D-1771-10	TCGA-A6-6142-10A-01D-1771-10
COAD	TCGA-A6-6648	TCGA-A6-6648-01A-11D-1771-10	TCGA-A6-6648-10A-01D-1771-10
COAD	TCGA-A6-6649	TCGA-A6-6649-01A-11D-1771-10	TCGA-A6-6649-10A-01D-1771-10
COAD	TCGA-A6-6651	TCGA-A6-6651-01A-21D-1835-10	TCGA-A6-6651-10A-01D-1835-10
COAD	TCGA-A6-6652	TCGA-A6-6652-01A-11D-1771-10	TCGA-A6-6652-10A-01D-1771-10
COAD	TCGA-A6-6653	TCGA-A6-6653-01A-11D-1771-10	TCGA-A6-6653-10A-01D-1771-10
COAD	TCGA-A6-6654	TCGA-A6-6654-01A-21D-1835-10	TCGA-A6-6654-10A-01D-1835-10
COAD	TCGA-A6-6780	TCGA-A6-6780-01A-11D-A270-10	TCGA-A6-6780-10A-01D-A270-10
COAD	TCGA-A6-6781	TCGA-A6-6781-01A-22D-A270-10	TCGA-A6-6781-10A-01D-A270-10
COAD	TCGA-A6-6782	TCGA-A6-6782-01A-11D-1835-10	TCGA-A6-6782-10A-01D-1835-10
COAD	TCGA-A6-A565	TCGA-A6-A565-01A-31D-A28G-10	TCGA-A6-A565-10A-01D-A28G-10
COAD	TCGA-A6-A566	TCGA-A6-A566-01A-11D-A28G-10	TCGA-A6-A566-10A-01D-A28G-10
COAD	TCGA-A6-A567	TCGA-A6-A567-01A-31D-A28G-10	TCGA-A6-A567-10A-01D-A28G-10
COAD	TCGA-A6-A56B	TCGA-A6-A56B-01A-31D-A28G-10	TCGA-A6-A56B-10A-01D-A28G-10
COAD	TCGA-AA-3489	TCGA-AA-3489-01A-21D-1835-10	TCGA-AA-3489-11A-01D-1835-10
COAD	TCGA-AA-3492	TCGA-AA-3492-01A-01D-1408-10	TCGA-AA-3492-11A-01D-1408-10
COAD	TCGA-AA-3496	TCGA-AA-3496-01A-21D-1835-10	TCGA-AA-3496-11A-01D-1835-10
COAD	TCGA-AA-3502	TCGA-AA-3502-01A-01D-1408-10	TCGA-AA-3502-11A-01D-1408-10
COAD	TCGA-AA-3506	TCGA-AA-3506-01A-01D-2188-10	TCGA-AA-3506-11A-01D-2188-10
COAD	TCGA-AA-3510	TCGA-AA-3510-01A-01D-1408-10	TCGA-AA-3510-11A-01D-1408-10
COAD	TCGA-AA-3511	TCGA-AA-3511-01A-21D-1835-10	TCGA-AA-3511-11A-01D-1835-10
COAD	TCGA-AA-3514	TCGA-AA-3514-01A-02D-1953-10	TCGA-AA-3514-10A-01D-1953-10
COAD	TCGA-AA-3517	TCGA-AA-3517-01A-01D-1953-10	TCGA-AA-3517-10A-01D-1953-10
COAD	TCGA-AA-3519	TCGA-AA-3519-01A-02D-1953-10	TCGA-AA-3519-10A-01D-1953-10
COAD	TCGA-AA-3520	TCGA-AA-3520-01A-01D-1953-10	TCGA-AA-3520-11A-01D-1554-10
COAD	TCGA-AA-3521	TCGA-AA-3521-01A-01D-1953-10	TCGA-AA-3521-11A-01D-1554-10
COAD	TCGA-AA-3522	TCGA-AA-3522-01A-01W-0831-10	TCGA-AA-3522-11A-01D-1554-10
COAD	TCGA-AA-3524	TCGA-AA-3524-01A-02D-1953-10	TCGA-AA-3524-11A-01D-1554-10
COAD	TCGA-AA-3526	TCGA-AA-3526-01A-02D-1953-10	TCGA-AA-3526-11A-01D-1554-10
COAD	TCGA-AA-3527	TCGA-AA-3527-01A-01D-1953-10	TCGA-AA-3527-10A-01D-1953-10
COAD	TCGA-AA-3529	TCGA-AA-3529-01A-02D-1953-10	TCGA-AA-3529-11A-01D-1554-10
COAD	TCGA-AA-3530	TCGA-AA-3530-01A-01W-0995-10	TCGA-AA-3530-10A-01W-0995-10
COAD	TCGA-AA-3531	TCGA-AA-3531-01A-01D-1953-10	TCGA-AA-3531-11A-01D-1554-10
COAD	TCGA-AA-3532	TCGA-AA-3532-01A-01D-1953-10	TCGA-AA-3532-11A-01D-1554-10
COAD	TCGA-AA-3534	TCGA-AA-3534-01A-01D-1953-10	TCGA-AA-3534-11A-01D-1554-10
COAD	TCGA-AA-3538	TCGA-AA-3538-01A-01D-1953-10	TCGA-AA-3538-10A-01D-1953-10
COAD	TCGA-AA-3544	TCGA-AA-3544-01A-01D-1953-10	TCGA-AA-3544-10A-01D-1953-10
COAD	TCGA-AA-3548	TCGA-AA-3548-01A-01D-1953-10	TCGA-AA-3548-10A-01D-1953-10
COAD	TCGA-AA-3549	TCGA-AA-3549-01A-02D-1953-10	TCGA-AA-3549-10A-01D-1953-10
COAD	TCGA-AA-3556	TCGA-AA-3556-01A-01D-1953-10	TCGA-AA-3556-10A-01D-1953-10
COAD	TCGA-AA-3558	TCGA-AA-3558-01A-01D-1953-10	TCGA-AA-3558-10A-01D-1953-10
COAD	TCGA-AA-3560	TCGA-AA-3560-01A-01D-1953-10	TCGA-AA-3560-10A-01D-1953-10
COAD	TCGA-AA-3561	TCGA-AA-3561-01A-01D-1953-10	TCGA-AA-3561-10A-01W-0831-10
COAD	TCGA-AA-3655	TCGA-AA-3655-01A-02D-1719-10	TCGA-AA-3655-11A-01D-1719-10
COAD	TCGA-AA-3660	TCGA-AA-3660-01A-01D-1719-10	TCGA-AA-3660-11A-01D-1719-10
COAD	TCGA-AA-3662	TCGA-AA-3662-01A-01D-1719-10	TCGA-AA-3662-11A-01D-1719-10
COAD	TCGA-AA-3663	TCGA-AA-3663-01A-01D-1719-10	TCGA-AA-3663-11A-01D-1719-10
COAD	TCGA-AA-3664	TCGA-AA-3664-01A-01W-0900-09	TCGA-AA-3664-10A-01W-0900-09
COAD	TCGA-AA-3666	TCGA-AA-3666-01A-02W-0900-09	TCGA-AA-3666-10A-01W-0900-09
COAD	TCGA-AA-3667	TCGA-AA-3667-01A-01W-0900-09	TCGA-AA-3667-10A-01W-0900-09
COAD	TCGA-AA-3672	TCGA-AA-3672-01A-01W-0900-09	TCGA-AA-3672-10A-01W-0900-09
COAD	TCGA-AA-3673	TCGA-AA-3673-01A-01W-0900-09	TCGA-AA-3673-10A-01W-0900-09
COAD	TCGA-AA-3675	TCGA-AA-3675-01A-02W-0900-09	TCGA-AA-3675-10A-01W-0900-09
COAD	TCGA-AA-3678	TCGA-AA-3678-01A-01W-0900-09	TCGA-AA-3678-10A-01W-0900-09
COAD	TCGA-AA-3679	TCGA-AA-3679-01A-02W-0900-09	TCGA-AA-3679-10A-01W-0900-09
COAD	TCGA-AA-3680	TCGA-AA-3680-01A-01W-0900-09	TCGA-AA-3680-10A-01W-0900-09
COAD	TCGA-AA-3681	TCGA-AA-3681-01A-01W-0900-09	TCGA-AA-3681-10A-01W-0900-09
COAD	TCGA-AA-3684	TCGA-AA-3684-01A-02W-0900-09	TCGA-AA-3684-10A-01W-0900-09
COAD	TCGA-AA-3685	TCGA-AA-3685-01A-02W-0900-09	TCGA-AA-3685-10A-01W-0900-09
COAD	TCGA-AA-3688	TCGA-AA-3688-01A-01W-0900-09	TCGA-AA-3688-10A-01W-0900-09
COAD	TCGA-AA-3692	TCGA-AA-3692-01A-01W-0900-09	TCGA-AA-3692-10A-01W-0900-09
COAD	TCGA-AA-3693	TCGA-AA-3693-01A-01W-0900-09	TCGA-AA-3693-10A-01W-0900-09
COAD	TCGA-AA-3695	TCGA-AA-3695-01A-01W-0900-09	TCGA-AA-3695-10A-01W-0900-09
COAD	TCGA-AA-3696	TCGA-AA-3696-01A-01W-0900-09	TCGA-AA-3696-10A-01W-0900-09
COAD	TCGA-AA-3697	TCGA-AA-3697-01A-01D-1719-10	TCGA-AA-3697-11A-01D-1719-10
COAD	TCGA-AA-3712	TCGA-AA-3712-01A-21D-1719-10	TCGA-AA-3712-11A-01D-1719-10
COAD	TCGA-AA-3713	TCGA-AA-3713-01A-21D-1719-10	TCGA-AA-3713-11A-01D-1719-10
COAD	TCGA-AA-3715	TCGA-AA-3715-01A-01W-0900-09	TCGA-AA-3715-10A-01W-0900-09
COAD	TCGA-AA-3811	TCGA-AA-3811-01A-01W-0995-10	TCGA-AA-3811-10A-01W-0995-10
COAD	TCGA-AA-3812	TCGA-AA-3812-01A-01W-0900-09	TCGA-AA-3812-10A-01W-0900-09
COAD	TCGA-AA-3814	TCGA-AA-3814-01A-01W-0900-09	TCGA-AA-3814-10A-01W-0900-09
COAD	TCGA-AA-3815	TCGA-AA-3815-01A-01W-0995-10	TCGA-AA-3815-10A-01W-0995-10
COAD	TCGA-AA-3818	TCGA-AA-3818-01A-01W-0900-09	TCGA-AA-3818-10A-01W-0900-09
COAD	TCGA-AA-3819	TCGA-AA-3819-01A-01W-0900-09	TCGA-AA-3819-10A-01W-0900-09
COAD	TCGA-AA-3821	TCGA-AA-3821-01A-01W-0995-10	TCGA-AA-3821-10A-01W-0995-10
COAD	TCGA-AA-3831	TCGA-AA-3831-01A-01W-0900-09	TCGA-AA-3831-10A-01W-0900-09
COAD	TCGA-AA-3833	TCGA-AA-3833-01A-01W-0900-09	TCGA-AA-3833-10A-01W-0900-09
COAD	TCGA-AA-3837	TCGA-AA-3837-01A-01W-0900-09	TCGA-AA-3837-10A-01W-0900-09
COAD	TCGA-AA-3841	TCGA-AA-3841-01A-01W-0900-09	TCGA-AA-3841-10A-01W-0900-09
COAD	TCGA-AA-3842	TCGA-AA-3842-01A-01W-0995-10	TCGA-AA-3842-10A-01W-0995-10
COAD	TCGA-AA-3844	TCGA-AA-3844-01A-01W-0995-10	TCGA-AA-3844-10A-01W-0995-10
COAD	TCGA-AA-3845	TCGA-AA-3845-01A-01W-0995-10	TCGA-AA-3845-10A-01W-0995-10
COAD	TCGA-AA-3846	TCGA-AA-3846-01A-01W-0995-10	TCGA-AA-3846-10A-01W-0995-10
COAD	TCGA-AA-3848	TCGA-AA-3848-01A-01W-0900-09	TCGA-AA-3848-10A-01W-0900-09
COAD	TCGA-AA-3850	TCGA-AA-3850-01A-01W-0995-10	TCGA-AA-3850-10A-01W-0995-10
COAD	TCGA-AA-3851	TCGA-AA-3851-01A-01W-0995-10	TCGA-AA-3851-10A-01W-0995-10
COAD	TCGA-AA-3852	TCGA-AA-3852-01A-01W-0900-09	TCGA-AA-3852-10A-01W-0900-09
COAD	TCGA-AA-3854	TCGA-AA-3854-01A-01W-0900-09	TCGA-AA-3854-10A-01W-0900-09
COAD	TCGA-AA-3855	TCGA-AA-3855-01A-01W-0995-10	TCGA-AA-3855-10A-01W-0995-10
COAD	TCGA-AA-3856	TCGA-AA-3856-01A-01W-0900-09	TCGA-AA-3856-10A-01W-0900-09
COAD	TCGA-AA-3858	TCGA-AA-3858-01A-01W-0900-09	TCGA-AA-3858-10A-01W-0900-09
COAD	TCGA-AA-3860	TCGA-AA-3860-01A-02W-0900-09	TCGA-AA-3860-10A-01W-0902-09
COAD	TCGA-AA-3861	TCGA-AA-3861-01A-01W-0995-10	TCGA-AA-3861-10A-01W-0995-10
COAD	TCGA-AA-3862	TCGA-AA-3862-01A-01W-0995-10	TCGA-AA-3862-10A-01W-0995-10
COAD	TCGA-AA-3864	TCGA-AA-3864-01A-01D-1981-10	TCGA-AA-3864-10A-01W-0995-10
COAD	TCGA-AA-3866	TCGA-AA-3866-01A-01W-0995-10	TCGA-AA-3866-10A-01W-0995-10
COAD	TCGA-AA-3867	TCGA-AA-3867-01A-01W-0995-10	TCGA-AA-3867-10A-01W-0995-10
COAD	TCGA-AA-3875	TCGA-AA-3875-01A-01W-0900-09	TCGA-AA-3875-10A-01W-0902-09
COAD	TCGA-AA-3877	TCGA-AA-3877-01A-01W-0995-10	TCGA-AA-3877-10A-01W-1982-10
COAD	TCGA-AA-3947	TCGA-AA-3947-01A-01D-1981-10	TCGA-AA-3947-10A-01D-1982-10
COAD	TCGA-AA-3949	TCGA-AA-3949-01A-01W-0995-10	TCGA-AA-3949-10A-01W-1982-10
COAD	TCGA-AA-3950	TCGA-AA-3950-01A-02W-0995-10	TCGA-AA-3950-10A-01W-0995-10
COAD	TCGA-AA-3952	TCGA-AA-3952-01A-01W-0995-10	TCGA-AA-3952-10A-01W-0995-10
COAD	TCGA-AA-3955	TCGA-AA-3955-01A-02W-0995-10	TCGA-AA-3955-10A-01W-0995-10
COAD	TCGA-AA-3956	TCGA-AA-3956-01A-02W-0995-10	TCGA-AA-3956-10A-01W-0995-10
COAD	TCGA-AA-3966	TCGA-AA-3966-01A-01W-1073-09	TCGA-AA-3966-10A-01W-1073-09
COAD	TCGA-AA-3967	TCGA-AA-3967-01A-01W-1073-09	TCGA-AA-3967-10A-01W-1073-09
COAD	TCGA-AA-3968	TCGA-AA-3968-01A-01W-0995-10	TCGA-AA-3968-10A-01W-0995-10
COAD	TCGA-AA-3971	TCGA-AA-3971-01A-01W-0995-10	TCGA-AA-3971-10A-01W-0999-10
COAD	TCGA-AA-3973	TCGA-AA-3973-01A-01W-0995-10	TCGA-AA-3973-10A-01W-0999-10
COAD	TCGA-AA-3975	TCGA-AA-3975-01A-01W-0995-10	TCGA-AA-3975-10A-01W-0999-10
COAD	TCGA-AA-3976	TCGA-AA-3976-01A-01W-0995-10	TCGA-AA-3976-10A-01W-0999-10
COAD	TCGA-AA-3977	TCGA-AA-3977-01A-01W-0995-10	TCGA-AA-3977-10A-01W-1982-10
COAD	TCGA-AA-3979	TCGA-AA-3979-01A-01W-0995-10	TCGA-AA-3979-10A-01W-0999-10
COAD	TCGA-AA-3980	TCGA-AA-3980-01A-02W-0995-10	TCGA-AA-3980-10A-01W-0999-10
COAD	TCGA-AA-3982	TCGA-AA-3982-01A-02W-0995-10	TCGA-AA-3982-10A-01W-0999-10
COAD	TCGA-AA-3984	TCGA-AA-3984-01A-02D-1981-10	TCGA-AA-3984-10A-01D-1982-10
COAD	TCGA-AA-3986	TCGA-AA-3986-01A-02W-0995-10	TCGA-AA-3986-10A-01W-0999-10
COAD	TCGA-AA-3989	TCGA-AA-3989-01A-01W-0995-10	TCGA-AA-3989-10A-01W-0999-10
COAD	TCGA-AA-3994	TCGA-AA-3994-01A-01W-1073-09	TCGA-AA-3994-10A-01W-1073-09
COAD	TCGA-AA-A004	TCGA-AA-A004-01A-01W-A00E-09	TCGA-AA-A004-10A-01W-A00E-09
COAD	TCGA-AA-A00N	TCGA-AA-A00N-01A-02D-A17O-10	TCGA-AA-A00N-10A-01D-A17O-10
COAD	TCGA-AA-A010	TCGA-AA-A010-01A-01D-A17O-10	TCGA-AA-A010-10A-01D-A17O-10
COAD	TCGA-AA-A017	TCGA-AA-A017-01A-01W-A00E-09	TCGA-AA-A017-10A-01W-A00E-09
COAD	TCGA-AA-A01C	TCGA-AA-A01C-01A-01W-A00E-09	TCGA-AA-A01C-10A-01W-A00E-09
COAD	TCGA-AA-A01I	TCGA-AA-A01I-01A-02W-A00E-09	TCGA-AA-A01I-10A-01W-A00E-09
COAD	TCGA-AA-A01P	TCGA-AA-A01P-01A-21D-A17O-10	TCGA-AA-A01P-11A-11D-A17O-10
COAD	TCGA-AA-A01R	TCGA-AA-A01R-01A-21D-A17O-10	TCGA-AA-A01R-11A-12D-A17O-10
COAD	TCGA-AA-A01S	TCGA-AA-A01S-01A-21W-A096-10	TCGA-AA-A01S-11A-21W-A096-10
COAD	TCGA-AA-A01T	TCGA-AA-A01T-01A-21W-A096-10	TCGA-AA-A01T-11A-11W-A096-10
COAD	TCGA-AA-A01V	TCGA-AA-A01V-01A-23W-A096-10	TCGA-AA-A01V-11A-11W-A096-10
COAD	TCGA-AA-A01X	TCGA-AA-A01X-01A-21W-A096-10	TCGA-AA-A01X-11A-11W-A096-10
COAD	TCGA-AA-A01Z	TCGA-AA-A01Z-01A-11W-A096-10	TCGA-AA-A01Z-11A-11W-A096-10
COAD	TCGA-AA-A022	TCGA-AA-A022-01A-21D-A17O-10	TCGA-AA-A022-11A-11D-A17O-10
COAD	TCGA-AA-A024	TCGA-AA-A024-01A-02W-A00E-09	TCGA-AA-A024-10A-01W-A00E-09
COAD	TCGA-AA-A02E	TCGA-AA-A02E-01A-01W-A00E-09	TCGA-AA-A02E-10A-01W-A00E-09
COAD	TCGA-AA-A02F	TCGA-AA-A02F-01A-01W-A00E-09	TCGA-AA-A02F-10A-01W-A00E-09
COAD	TCGA-AA-A02H	TCGA-AA-A02H-01A-01W-A00E-09	TCGA-AA-A02H-10A-01W-A00E-09
COAD	TCGA-AA-A02K	TCGA-AA-A02K-01A-21W-A096-10	TCGA-AA-A02K-10A-01W-A096-10
COAD	TCGA-AA-A02O	TCGA-AA-A02O-01A-21W-A096-10	TCGA-AA-A02O-11A-11W-A096-10
COAD	TCGA-AA-A02R	TCGA-AA-A02R-01A-01W-A00E-09	TCGA-AA-A02R-10A-01W-A00E-09
COAD	TCGA-AA-A02W	TCGA-AA-A02W-01A-01W-A00E-09	TCGA-AA-A02W-10A-01W-A00E-09
COAD	TCGA-AA-A02Y	TCGA-AA-A02Y-01A-43W-A096-10	TCGA-AA-A02Y-10A-01W-A096-10
COAD	TCGA-AA-A03F	TCGA-AA-A03F-01A-11W-A096-10	TCGA-AA-A03F-11A-12W-A096-10
COAD	TCGA-AA-A03J	TCGA-AA-A03J-01A-21W-A096-10	TCGA-AA-A03J-11A-11W-A096-10
COAD	TCGA-AD-5900	TCGA-AD-5900-01A-11D-1650-10	TCGA-AD-5900-10A-01D-1650-10
COAD	TCGA-AD-6548	TCGA-AD-6548-01A-11D-1835-10	TCGA-AD-6548-10A-01D-1835-10
COAD	TCGA-AD-6888	TCGA-AD-6888-01A-11D-1924-10	TCGA-AD-6888-10A-01D-1924-10
COAD	TCGA-AD-6889	TCGA-AD-6889-01A-11D-1924-10	TCGA-AD-6889-10A-01D-1924-10
COAD	TCGA-AD-6890	TCGA-AD-6890-01A-11D-1924-10	TCGA-AD-6890-10A-01D-1924-10
COAD	TCGA-AD-6895	TCGA-AD-6895-01A-11D-1924-10	TCGA-AD-6895-10A-01D-1924-10
COAD	TCGA-AD-6899	TCGA-AD-6899-01A-11D-1924-10	TCGA-AD-6899-10A-01D-1924-10
COAD	TCGA-AD-6901	TCGA-AD-6901-01A-11D-1924-10	TCGA-AD-6901-10A-01D-1924-10
COAD	TCGA-AD-6963	TCGA-AD-6963-01A-11D-1924-10	TCGA-AD-6963-10A-01D-1924-10
COAD	TCGA-AD-6964	TCGA-AD-6964-01A-11D-1924-10	TCGA-AD-6964-10A-01D-1924-10
COAD	TCGA-AD-6965	TCGA-AD-6965-01A-11D-1924-10	TCGA-AD-6965-10A-01D-1924-10
COAD	TCGA-AD-A5EJ	TCGA-AD-A5EJ-01A-11D-A28G-10	TCGA-AD-A5EJ-10A-01D-A28G-10
COAD	TCGA-AD-A5EK	TCGA-AD-A5EK-01A-11D-A28G-10	TCGA-AD-A5EK-10A-01D-A28G-10
COAD	TCGA-AM-5820	TCGA-AM-5820-01A-01D-1650-10	TCGA-AM-5820-10A-01D-1650-10
COAD	TCGA-AM-5821	TCGA-AM-5821-01A-01D-1650-10	TCGA-AM-5821-10A-01D-1650-10
COAD	TCGA-AU-3779	TCGA-AU-3779-01A-01D-1719-10	TCGA-AU-3779-10A-01D-1719-10
COAD	TCGA-AU-6004	TCGA-AU-6004-01A-11D-1719-10	TCGA-AU-6004-10A-01D-1719-10
COAD	TCGA-AY-4070	TCGA-AY-4070-01A-01W-1073-09	TCGA-AY-4070-10A-01W-1073-09
COAD	TCGA-AY-4071	TCGA-AY-4071-01A-01W-1073-09	TCGA-AY-4071-10A-01W-1073-09
COAD	TCGA-AY-5543	TCGA-AY-5543-01A-01D-1650-10	TCGA-AY-5543-10A-01D-1650-10
COAD	TCGA-AY-6196	TCGA-AY-6196-01A-11D-1719-10	TCGA-AY-6196-10A-01D-1719-10
COAD	TCGA-AY-6197	TCGA-AY-6197-01A-11D-1719-10	TCGA-AY-6197-10A-01D-1719-10
COAD	TCGA-AY-6386	TCGA-AY-6386-01A-21D-1719-10	TCGA-AY-6386-10A-01D-1719-10
COAD	TCGA-AY-A54L	TCGA-AY-A54L-01A-11D-A28G-10	TCGA-AY-A54L-10A-01D-A28G-10
COAD	TCGA-AY-A69D	TCGA-AY-A69D-01A-11D-A36X-10	TCGA-AY-A69D-10A-01D-A370-10
COAD	TCGA-AY-A71X	TCGA-AY-A71X-01A-12D-A36X-10	TCGA-AY-A71X-10A-01D-A370-10
COAD	TCGA-AY-A8YK	TCGA-AY-A8YK-01A-11D-A40P-10	TCGA-AY-A8YK-10A-01D-A40P-10
COAD	TCGA-AZ-4308	TCGA-AZ-4308-01A-01D-1408-10	TCGA-AZ-4308-10A-01D-2188-10
COAD	TCGA-AZ-4323	TCGA-AZ-4323-01A-21D-1835-10	TCGA-AZ-4323-10A-01D-1835-10
COAD	TCGA-AZ-4614	TCGA-AZ-4614-01A-01D-1408-10	TCGA-AZ-4614-10A-01D-2188-10
COAD	TCGA-AZ-4615	TCGA-AZ-4615-01A-01D-1408-10	TCGA-AZ-4615-10A-01D-1408-10
COAD	TCGA-AZ-4616	TCGA-AZ-4616-01A-21D-1835-10	TCGA-AZ-4616-10A-01D-1835-10
COAD	TCGA-AZ-4681	TCGA-AZ-4681-01A-01D-1408-10	TCGA-AZ-4681-10A-01D-1408-10
COAD	TCGA-AZ-4682	TCGA-AZ-4682-01B-01D-1408-10	TCGA-AZ-4682-10A-01D-1408-10
COAD	TCGA-AZ-5403	TCGA-AZ-5403-01A-01D-1650-10	TCGA-AZ-5403-10A-01D-1650-10
COAD	TCGA-AZ-5407	TCGA-AZ-5407-01A-01D-1719-10	TCGA-AZ-5407-10A-01D-1719-10
COAD	TCGA-AZ-6598	TCGA-AZ-6598-01A-11D-1771-10	TCGA-AZ-6598-11A-01D-1771-10
COAD	TCGA-AZ-6599	TCGA-AZ-6599-01A-11D-1771-10	TCGA-AZ-6599-11A-01D-1771-10
COAD	TCGA-AZ-6600	TCGA-AZ-6600-01A-11D-1771-10	TCGA-AZ-6600-11A-01D-1771-10
COAD	TCGA-AZ-6601	TCGA-AZ-6601-01A-11D-1771-10	TCGA-AZ-6601-11A-01D-1771-10
COAD	TCGA-AZ-6603	TCGA-AZ-6603-01A-11D-1835-10	TCGA-AZ-6603-11A-02D-1835-10
COAD	TCGA-AZ-6605	TCGA-AZ-6605-01A-11D-1835-10	TCGA-AZ-6605-11A-01D-1835-10
COAD	TCGA-AZ-6606	TCGA-AZ-6606-01A-11D-1835-10	TCGA-AZ-6606-11A-01D-1835-10
COAD	TCGA-AZ-6607	TCGA-AZ-6607-01A-11D-1835-10	TCGA-AZ-6607-11A-01D-1835-10
COAD	TCGA-AZ-6608	TCGA-AZ-6608-01A-11D-1835-10	TCGA-AZ-6608-11A-01D-1835-10
COAD	TCGA-CA-5254	TCGA-CA-5254-01A-21D-1835-10	TCGA-CA-5254-10A-01D-1835-10
COAD	TCGA-CA-5255	TCGA-CA-5255-01A-11D-1835-10	TCGA-CA-5255-10A-01D-1835-10
COAD	TCGA-CA-5256	TCGA-CA-5256-01A-01D-1408-10	TCGA-CA-5256-10A-01D-2188-10
COAD	TCGA-CA-5796	TCGA-CA-5796-01A-01D-1650-10	TCGA-CA-5796-10A-01D-1650-10
COAD	TCGA-CA-5797	TCGA-CA-5797-01A-01D-1650-10	TCGA-CA-5797-10A-01D-1650-10
COAD	TCGA-CA-6715	TCGA-CA-6715-01A-21D-1835-10	TCGA-CA-6715-10A-01D-1835-10
COAD	TCGA-CA-6716	TCGA-CA-6716-01A-11D-1835-10	TCGA-CA-6716-10A-01D-1835-10
COAD	TCGA-CA-6718	TCGA-CA-6718-01A-11D-1835-10	TCGA-CA-6718-10A-01D-1835-10
COAD	TCGA-CA-6719	TCGA-CA-6719-01A-11D-1835-10	TCGA-CA-6719-10A-01D-1835-10
COAD	TCGA-CK-4947	TCGA-CK-4947-01B-11D-1650-10	TCGA-CK-4947-10A-01D-1650-10
COAD	TCGA-CK-4948	TCGA-CK-4948-01B-11D-1650-10	TCGA-CK-4948-10A-01D-1650-10
COAD	TCGA-CK-4950	TCGA-CK-4950-01A-01D-1719-10	TCGA-CK-4950-10A-01D-1719-10
COAD	TCGA-CK-4951	TCGA-CK-4951-01A-01D-1408-10	TCGA-CK-4951-10A-01D-2188-10
COAD	TCGA-CK-4952	TCGA-CK-4952-01A-01D-1719-10	TCGA-CK-4952-10A-01D-1719-10
COAD	TCGA-CK-5912	TCGA-CK-5912-01A-11D-1650-10	TCGA-CK-5912-10A-01D-1650-10
COAD	TCGA-CK-5913	TCGA-CK-5913-01A-11D-1650-10	TCGA-CK-5913-10A-01D-1650-10
COAD	TCGA-CK-5914	TCGA-CK-5914-01A-11D-1650-10	TCGA-CK-5914-10A-01D-1650-10
COAD	TCGA-CK-5915	TCGA-CK-5915-01A-11D-1650-10	TCGA-CK-5915-10A-01D-1650-10
COAD	TCGA-CK-5916	TCGA-CK-5916-01A-11D-1650-10	TCGA-CK-5916-10A-01D-1650-10
COAD	TCGA-CK-6746	TCGA-CK-6746-01A-11D-1835-10	TCGA-CK-6746-10A-01D-1835-10
COAD	TCGA-CK-6747	TCGA-CK-6747-01A-11D-1835-10	TCGA-CK-6747-10A-01D-1835-10
COAD	TCGA-CK-6748	TCGA-CK-6748-01A-11D-1835-10	TCGA-CK-6748-10A-01D-1835-10
COAD	TCGA-CK-6751	TCGA-CK-6751-01A-11D-1835-10	TCGA-CK-6751-10A-01D-1835-10
COAD	TCGA-CM-4743	TCGA-CM-4743-01A-01D-1719-10	TCGA-CM-4743-10A-01D-1719-10
COAD	TCGA-CM-4744	TCGA-CM-4744-01A-01D-1408-10	TCGA-CM-4744-10A-01D-1408-10
COAD	TCGA-CM-4746	TCGA-CM-4746-01A-01D-1408-10	TCGA-CM-4746-10A-01D-1408-10
COAD	TCGA-CM-4747	TCGA-CM-4747-01A-01D-1408-10	TCGA-CM-4747-10A-01D-1408-10
COAD	TCGA-CM-4748	TCGA-CM-4748-01A-01D-1408-10	TCGA-CM-4748-10A-01D-1408-10
COAD	TCGA-CM-4750	TCGA-CM-4750-01A-01D-1408-10	TCGA-CM-4750-10A-01D-1408-10
COAD	TCGA-CM-4751	TCGA-CM-4751-01A-02D-1835-10	TCGA-CM-4751-10A-01D-1835-10
COAD	TCGA-CM-4752	TCGA-CM-4752-01A-01D-1408-10	TCGA-CM-4752-10A-01D-1408-10
COAD	TCGA-CM-5341	TCGA-CM-5341-01A-01D-1408-10	TCGA-CM-5341-10A-01D-1408-10
COAD	TCGA-CM-5344	TCGA-CM-5344-01A-21D-1719-10	TCGA-CM-5344-10A-01D-1719-10
COAD	TCGA-CM-5348	TCGA-CM-5348-01A-21D-1719-10	TCGA-CM-5348-10A-01D-1719-10
COAD	TCGA-CM-5349	TCGA-CM-5349-01A-21D-1719-10	TCGA-CM-5349-10A-01D-1719-10
COAD	TCGA-CM-5860	TCGA-CM-5860-01A-01D-1650-10	TCGA-CM-5860-10A-01D-1650-10
COAD	TCGA-CM-5861	TCGA-CM-5861-01A-01D-1650-10	TCGA-CM-5861-10A-01D-1650-10
COAD	TCGA-CM-5862	TCGA-CM-5862-01A-01D-1650-10	TCGA-CM-5862-10A-01D-1650-10
COAD	TCGA-CM-5863	TCGA-CM-5863-01A-21D-1835-10	TCGA-CM-5863-10A-01D-1835-10
COAD	TCGA-CM-5864	TCGA-CM-5864-01A-01D-1650-10	TCGA-CM-5864-10A-01D-1650-10
COAD	TCGA-CM-5868	TCGA-CM-5868-01A-01D-1650-10	TCGA-CM-5868-10A-01D-1650-10
COAD	TCGA-CM-6161	TCGA-CM-6161-01A-11D-1650-10	TCGA-CM-6161-10A-01D-1650-10
COAD	TCGA-CM-6162	TCGA-CM-6162-01A-11D-1650-10	TCGA-CM-6162-10A-01W-1727-10
COAD	TCGA-CM-6163	TCGA-CM-6163-01A-11D-1650-10	TCGA-CM-6163-10A-01D-1650-10
COAD	TCGA-CM-6164	TCGA-CM-6164-01A-11D-1650-10	TCGA-CM-6164-10A-01D-1650-10
COAD	TCGA-CM-6165	TCGA-CM-6165-01A-11D-1650-10	TCGA-CM-6165-10A-01D-1650-10
COAD	TCGA-CM-6166	TCGA-CM-6166-01A-11D-1650-10	TCGA-CM-6166-10A-01D-1650-10
COAD	TCGA-CM-6167	TCGA-CM-6167-01A-11D-1650-10	TCGA-CM-6167-10A-01D-1650-10
COAD	TCGA-CM-6168	TCGA-CM-6168-01A-11D-1650-10	TCGA-CM-6168-10A-01D-1650-10
COAD	TCGA-CM-6169	TCGA-CM-6169-01A-11D-1650-10	TCGA-CM-6169-10A-01D-1650-10
COAD	TCGA-CM-6170	TCGA-CM-6170-01A-11D-1650-10	TCGA-CM-6170-10A-01D-1650-10
COAD	TCGA-CM-6171	TCGA-CM-6171-01A-11D-1650-10	TCGA-CM-6171-10A-01D-1650-10
COAD	TCGA-CM-6172	TCGA-CM-6172-01A-11D-1650-10	TCGA-CM-6172-10A-01D-1650-10
COAD	TCGA-CM-6674	TCGA-CM-6674-01A-11D-1835-10	TCGA-CM-6674-10A-01D-1835-10
COAD	TCGA-CM-6675	TCGA-CM-6675-01A-11D-1835-10	TCGA-CM-6675-10A-01D-1835-10
COAD	TCGA-CM-6676	TCGA-CM-6676-01A-11D-1835-10	TCGA-CM-6676-10A-01D-1835-10
COAD	TCGA-CM-6677	TCGA-CM-6677-01A-11D-1835-10	TCGA-CM-6677-10A-01D-1835-10
COAD	TCGA-CM-6678	TCGA-CM-6678-01A-11D-1835-10	TCGA-CM-6678-10A-01D-1835-10
COAD	TCGA-CM-6679	TCGA-CM-6679-01A-11D-1835-10	TCGA-CM-6679-10A-01D-1835-10
COAD	TCGA-CM-6680	TCGA-CM-6680-01A-11D-1835-10	TCGA-CM-6680-10A-01D-1835-10
COAD	TCGA-D5-5537	TCGA-D5-5537-01A-21D-1924-10	TCGA-D5-5537-10A-01D-1924-10
COAD	TCGA-D5-5538	TCGA-D5-5538-01A-01D-1650-10	TCGA-D5-5538-10A-02D-1650-10
COAD	TCGA-D5-5539	TCGA-D5-5539-01A-01D-1650-10	TCGA-D5-5539-10A-01D-1650-10
COAD	TCGA-D5-5540	TCGA-D5-5540-01A-01D-1650-10	TCGA-D5-5540-10A-01D-1650-10
COAD	TCGA-D5-5541	TCGA-D5-5541-01A-01D-1650-10	TCGA-D5-5541-10A-02D-1650-10
COAD	TCGA-D5-6529	TCGA-D5-6529-01A-11D-1771-10	TCGA-D5-6529-10A-01D-1771-10
COAD	TCGA-D5-6530	TCGA-D5-6530-01A-11D-1719-10	TCGA-D5-6530-10A-01D-1719-10
COAD	TCGA-D5-6531	TCGA-D5-6531-01A-11D-1719-10	TCGA-D5-6531-10A-01D-1719-10
COAD	TCGA-D5-6532	TCGA-D5-6532-01A-11D-1719-10	TCGA-D5-6532-10A-01D-1719-10
COAD	TCGA-D5-6533	TCGA-D5-6533-01A-11D-1719-10	TCGA-D5-6533-10A-01D-1719-10
COAD	TCGA-D5-6534	TCGA-D5-6534-01A-21D-1924-10	TCGA-D5-6534-10A-01D-1924-10
COAD	TCGA-D5-6535	TCGA-D5-6535-01A-11D-1719-10	TCGA-D5-6535-10A-01D-1719-10
COAD	TCGA-D5-6536	TCGA-D5-6536-01A-11D-1719-10	TCGA-D5-6536-10A-01D-1719-10
COAD	TCGA-D5-6537	TCGA-D5-6537-01A-11D-1719-10	TCGA-D5-6537-10A-01D-1719-10
COAD	TCGA-D5-6538	TCGA-D5-6538-01A-11D-1719-10	TCGA-D5-6538-10A-01D-1719-10
COAD	TCGA-D5-6539	TCGA-D5-6539-01A-11D-1719-10	TCGA-D5-6539-10A-01D-1719-10
COAD	TCGA-D5-6540	TCGA-D5-6540-01A-11D-1719-10	TCGA-D5-6540-10A-01D-1719-10
COAD	TCGA-D5-6541	TCGA-D5-6541-01A-11D-1719-10	TCGA-D5-6541-10A-01D-1719-10
COAD	TCGA-D5-6898	TCGA-D5-6898-01A-11D-1924-10	TCGA-D5-6898-10A-01D-1924-10
COAD	TCGA-D5-6920	TCGA-D5-6920-01A-11D-1924-10	TCGA-D5-6920-10A-01D-1924-10
COAD	TCGA-D5-6922	TCGA-D5-6922-01A-11D-1924-10	TCGA-D5-6922-10A-01D-1924-10
COAD	TCGA-D5-6924	TCGA-D5-6924-01A-11D-1924-10	TCGA-D5-6924-10A-01D-1924-10
COAD	TCGA-D5-6926	TCGA-D5-6926-01A-11D-1924-10	TCGA-D5-6926-10A-01D-1924-10
COAD	TCGA-D5-6927	TCGA-D5-6927-01A-21D-1924-10	TCGA-D5-6927-10A-01D-1924-10
COAD	TCGA-D5-6928	TCGA-D5-6928-01A-11D-1924-10	TCGA-D5-6928-10A-01D-1924-10
COAD	TCGA-D5-6929	TCGA-D5-6929-01A-31D-1924-10	TCGA-D5-6929-10A-01D-1924-10
COAD	TCGA-D5-6930	TCGA-D5-6930-01A-11D-1924-10	TCGA-D5-6930-10A-01D-1924-10
COAD	TCGA-D5-6931	TCGA-D5-6931-01A-11D-1924-10	TCGA-D5-6931-10A-01D-1924-10
COAD	TCGA-D5-6932	TCGA-D5-6932-01A-11D-1924-10	TCGA-D5-6932-10A-01D-1924-10
COAD	TCGA-D5-7000	TCGA-D5-7000-01A-11D-1924-10	TCGA-D5-7000-10A-01D-1924-10
COAD	TCGA-DM-A0X9	TCGA-DM-A0X9-01A-11D-A152-10	TCGA-DM-A0X9-10A-01D-A152-10
COAD	TCGA-DM-A0XD	TCGA-DM-A0XD-01A-12D-A152-10	TCGA-DM-A0XD-10A-01D-A152-10
COAD	TCGA-DM-A0XF	TCGA-DM-A0XF-01A-11D-A152-10	TCGA-DM-A0XF-10A-01D-A152-10
COAD	TCGA-DM-A1D0	TCGA-DM-A1D0-01A-11D-A152-10	TCGA-DM-A1D0-10A-01D-A152-10
COAD	TCGA-DM-A1D4	TCGA-DM-A1D4-01A-21D-A152-10	TCGA-DM-A1D4-10A-01D-A152-10
COAD	TCGA-DM-A1D6	TCGA-DM-A1D6-01A-21D-A152-10	TCGA-DM-A1D6-10A-01D-A152-10
COAD	TCGA-DM-A1D7	TCGA-DM-A1D7-01A-11D-A152-10	TCGA-DM-A1D7-10A-01D-A152-10
COAD	TCGA-DM-A1D8	TCGA-DM-A1D8-01A-11D-A152-10	TCGA-DM-A1D8-10A-01D-A152-10
COAD	TCGA-DM-A1D9	TCGA-DM-A1D9-01A-11D-A152-10	TCGA-DM-A1D9-10A-01D-A152-10
COAD	TCGA-DM-A1DA	TCGA-DM-A1DA-01A-11D-A152-10	TCGA-DM-A1DA-10A-01D-A152-10
COAD	TCGA-DM-A1DB	TCGA-DM-A1DB-01A-11D-A152-10	TCGA-DM-A1DB-10A-01D-A152-10
COAD	TCGA-DM-A1HA	TCGA-DM-A1HA-01A-11D-A152-10	TCGA-DM-A1HA-10A-01D-A152-10
COAD	TCGA-DM-A1HB	TCGA-DM-A1HB-01A-21D-A183-10	TCGA-DM-A1HB-10A-01D-A183-10
COAD	TCGA-DM-A280	TCGA-DM-A280-01A-12D-A16V-10	TCGA-DM-A280-10A-01D-A16V-10
COAD	TCGA-DM-A282	TCGA-DM-A282-01A-12D-A16V-10	TCGA-DM-A282-10A-01D-A16V-10
COAD	TCGA-DM-A285	TCGA-DM-A285-01A-11D-A16V-10	TCGA-DM-A285-10A-01D-A16V-10
COAD	TCGA-DM-A288	TCGA-DM-A288-01A-11D-A16V-10	TCGA-DM-A288-10A-01D-A16V-10
COAD	TCGA-DM-A28A	TCGA-DM-A28A-01A-21D-A16V-10	TCGA-DM-A28A-10A-01D-A16V-10
COAD	TCGA-DM-A28C	TCGA-DM-A28C-01A-11D-A16V-10	TCGA-DM-A28C-10A-01D-A16V-10
COAD	TCGA-DM-A28E	TCGA-DM-A28E-01A-11D-A16V-10	TCGA-DM-A28E-10A-01D-A16V-10
COAD	TCGA-DM-A28F	TCGA-DM-A28F-01A-11D-A16V-10	TCGA-DM-A28F-10A-01D-A16V-10
COAD	TCGA-DM-A28G	TCGA-DM-A28G-01A-11D-A16V-10	TCGA-DM-A28G-10A-01D-A16V-10
COAD	TCGA-DM-A28H	TCGA-DM-A28H-01A-11D-A16V-10	TCGA-DM-A28H-10A-01D-A16V-10
COAD	TCGA-DM-A28K	TCGA-DM-A28K-01A-21D-A16V-10	TCGA-DM-A28K-10A-01D-A16V-10
COAD	TCGA-DM-A28M	TCGA-DM-A28M-01A-12D-A16V-10	TCGA-DM-A28M-10A-01D-A16V-10
COAD	TCGA-F4-6459	TCGA-F4-6459-01A-11D-1771-10	TCGA-F4-6459-10A-01D-1771-10
COAD	TCGA-F4-6460	TCGA-F4-6460-01A-11D-1771-10	TCGA-F4-6460-10B-01D-1771-10
COAD	TCGA-F4-6461	TCGA-F4-6461-01A-11D-1771-10	TCGA-F4-6461-10A-01D-1806-10
COAD	TCGA-F4-6463	TCGA-F4-6463-01A-11D-1719-10	TCGA-F4-6463-10A-01D-1719-10
COAD	TCGA-F4-6569	TCGA-F4-6569-01A-11D-1771-10	TCGA-F4-6569-10A-01D-1771-10
COAD	TCGA-F4-6570	TCGA-F4-6570-01A-11D-1771-10	TCGA-F4-6570-10A-01D-1771-10
COAD	TCGA-F4-6703	TCGA-F4-6703-01A-11D-1835-10	TCGA-F4-6703-10A-01D-1835-10
COAD	TCGA-F4-6704	TCGA-F4-6704-01A-11D-1835-10	TCGA-F4-6704-11A-01D-1835-10
COAD	TCGA-F4-6805	TCGA-F4-6805-01A-11D-1835-10	TCGA-F4-6805-10A-01D-1835-10
COAD	TCGA-F4-6806	TCGA-F4-6806-01A-11D-1835-10	TCGA-F4-6806-10A-01D-1835-10
COAD	TCGA-F4-6807	TCGA-F4-6807-01A-11D-1835-10	TCGA-F4-6807-10A-01D-1835-10
COAD	TCGA-F4-6808	TCGA-F4-6808-01A-11D-1835-10	TCGA-F4-6808-10A-01D-1835-10
COAD	TCGA-F4-6809	TCGA-F4-6809-01A-11D-1835-10	TCGA-F4-6809-10A-01D-1835-10
COAD	TCGA-F4-6854	TCGA-F4-6854-01A-11D-1924-10	TCGA-F4-6854-10A-01D-1924-10
COAD	TCGA-F4-6855	TCGA-F4-6855-01A-11D-1924-10	TCGA-F4-6855-10A-01D-1924-10
COAD	TCGA-F4-6856	TCGA-F4-6856-01A-11D-1924-10	TCGA-F4-6856-10A-01D-1924-10
COAD	TCGA-G4-6293	TCGA-G4-6293-01A-11D-1719-10	TCGA-G4-6293-10A-01D-1719-10
COAD	TCGA-G4-6294	TCGA-G4-6294-01A-11D-1806-10	TCGA-G4-6294-10A-01D-1771-10
COAD	TCGA-G4-6295	TCGA-G4-6295-01A-11D-1719-10	TCGA-G4-6295-10A-01D-1719-10
COAD	TCGA-G4-6297	TCGA-G4-6297-01A-11D-1719-10	TCGA-G4-6297-10A-01D-1719-10
COAD	TCGA-G4-6298	TCGA-G4-6298-01A-11D-1719-10	TCGA-G4-6298-10A-01D-1719-10
COAD	TCGA-G4-6299	TCGA-G4-6299-01A-11D-1771-10	TCGA-G4-6299-10A-01D-1771-10
COAD	TCGA-G4-6302	TCGA-G4-6302-01A-11D-1719-10	TCGA-G4-6302-10A-01D-1719-10
COAD	TCGA-G4-6303	TCGA-G4-6303-01A-11D-1771-10	TCGA-G4-6303-10A-01D-1771-10
COAD	TCGA-G4-6304	TCGA-G4-6304-01A-11D-1924-10	TCGA-G4-6304-10A-01D-1924-10
COAD	TCGA-G4-6306	TCGA-G4-6306-01A-11D-1771-10	TCGA-G4-6306-10A-01D-1771-10
COAD	TCGA-G4-6307	TCGA-G4-6307-01A-11D-1719-10	TCGA-G4-6307-10A-01D-1720-10
COAD	TCGA-G4-6309	TCGA-G4-6309-01A-21D-1835-10	TCGA-G4-6309-10A-01D-1835-10
COAD	TCGA-G4-6310	TCGA-G4-6310-01A-11D-1719-10	TCGA-G4-6310-10A-01D-1720-10
COAD	TCGA-G4-6311	TCGA-G4-6311-01A-11D-1719-10	TCGA-G4-6311-10A-01D-1720-10
COAD	TCGA-G4-6314	TCGA-G4-6314-01A-11D-1719-10	TCGA-G4-6314-10A-01D-1720-10
COAD	TCGA-G4-6315	TCGA-G4-6315-01A-11D-1719-10	TCGA-G4-6315-10A-01D-1720-10
COAD	TCGA-G4-6317	TCGA-G4-6317-01A-11D-1719-10	TCGA-G4-6317-10A-01D-1720-10
COAD	TCGA-G4-6320	TCGA-G4-6320-01A-11D-1719-10	TCGA-G4-6320-10A-01D-1720-10
COAD	TCGA-G4-6321	TCGA-G4-6321-01A-11D-1719-10	TCGA-G4-6321-10A-01D-1720-10
COAD	TCGA-G4-6322	TCGA-G4-6322-01A-11D-1719-10	TCGA-G4-6322-10A-01D-1720-10
COAD	TCGA-G4-6323	TCGA-G4-6323-01A-11D-1719-10	TCGA-G4-6323-10A-01D-1720-10
COAD	TCGA-G4-6586	TCGA-G4-6586-01A-11D-1771-10	TCGA-G4-6586-10A-01D-1771-10
COAD	TCGA-G4-6588	TCGA-G4-6588-01A-11D-1771-10	TCGA-G4-6588-10A-01D-1771-10
COAD	TCGA-G4-6625	TCGA-G4-6625-01A-21D-1771-10	TCGA-G4-6625-11A-01D-1771-10
COAD	TCGA-G4-6626	TCGA-G4-6626-01A-11D-1771-10	TCGA-G4-6626-10A-01D-1771-10
COAD	TCGA-G4-6627	TCGA-G4-6627-01A-11D-2188-10	TCGA-G4-6627-10A-01D-1771-10
COAD	TCGA-G4-6628	TCGA-G4-6628-01A-11D-1835-10	TCGA-G4-6628-10A-01D-1835-10
COAD	TCGA-NH-A50T	TCGA-NH-A50T-01A-11D-A28G-10	TCGA-NH-A50T-10A-01D-A28G-10
COAD	TCGA-NH-A50U	TCGA-NH-A50U-01A-33D-A36X-10	TCGA-NH-A50U-10A-01D-A370-10
COAD	TCGA-NH-A50V	TCGA-NH-A50V-01A-11D-A28G-10	TCGA-NH-A50V-10A-01D-A28G-10
COAD	TCGA-NH-A5IV	TCGA-NH-A5IV-01A-42D-A36X-10	TCGA-NH-A5IV-10A-01D-A370-10
COAD	TCGA-NH-A6GA	TCGA-NH-A6GA-01A-11D-A36X-10	TCGA-NH-A6GA-10A-01D-A370-10
COAD	TCGA-NH-A6GB	TCGA-NH-A6GB-01A-11D-A36X-10	TCGA-NH-A6GB-10A-01D-A370-10
COAD	TCGA-NH-A6GC	TCGA-NH-A6GC-01A-12D-A40P-10	TCGA-NH-A6GC-10A-01D-A40P-10
COAD	TCGA-NH-A8F7	TCGA-NH-A8F7-01A-11D-A40P-10	TCGA-NH-A8F7-10A-01D-A40P-10
COAD	TCGA-NH-A8F8	TCGA-NH-A8F8-01A-72D-A40P-10	TCGA-NH-A8F8-10A-01D-A40P-10
COAD	TCGA-QG-A5YV	TCGA-QG-A5YV-01A-11D-A28G-10	TCGA-QG-A5YV-10A-01D-A28G-10
COAD	TCGA-QG-A5YW	TCGA-QG-A5YW-01A-11D-A28G-10	TCGA-QG-A5YW-10A-01D-A28G-10
COAD	TCGA-QG-A5YX	TCGA-QG-A5YW-01A-11D-A28G-10	TCGA-QG-A5YW-10A-01D-A28G-10
COAD	TCGA-QG-A5Z1	TCGA-QG-A5Z1-01A-11D-A28G-10	TCGA-QG-A5Z1-10A-01D-A28G-10
COAD	TCGA-QG-A5Z2	TCGA-QG-A5Z2-01A-11D-A28G-10	TCGA-QG-A5Z2-10A-01D-A28G-10
COAD	TCGA-QL-A97D	TCGA-QL-A97D-01A-12D-A40P-10	TCGA-QL-A97D-10A-01D-A40P-10
COAD	TCGA-RU-A8FL	TCGA-RU-A8FL-01A-11D-A36X-10	TCGA-RU-A8FL-10A-01D-A370-10
COAD	TCGA-SS-A7HO	TCGA-SS-A7HO-01A-21D-A36X-10	TCGA-SS-A7HO-10A-01D-A370-10
COAD	TCGA-T9-A92H	TCGA-T9-A92H-01A-11D-A36X-10	TCGA-T9-A92H-10A-01D-A370-10
COAD	TCGA-WS-AB45	TCGA-WS-AB45-01A-11D-A40P-10	TCGA-WS-AB45-10A-01D-A40P-10

## Sheet: DLBC
TCGA Cancer type	CDR list	Tumor_Sample_Barcode	Matched_Norm_Sample_Barcode
DLBC	TCGA-FA-8693	TCGA-FA-8693-01A-11D-2397-10	TCGA-FA-8693-10A-01D-2397-10
DLBC	TCGA-FA-A4BB	TCGA-FA-A4BB-01A-11D-A31X-10	TCGA-FA-A4BB-10A-01D-A31X-10
DLBC	TCGA-FA-A4XK	TCGA-FA-A4XK-01A-11D-A31X-10	TCGA-FA-A4XK-10A-01D-A31X-10
DLBC	TCGA-FA-A6HN	TCGA-FA-A6HN-01A-11D-A31X-10	TCGA-FA-A6HN-10A-01D-A31X-10
DLBC	TCGA-FA-A6HO	TCGA-FA-A6HO-01A-11D-A31X-10	TCGA-FA-A6HO-10A-01D-A31X-10
DLBC	TCGA-FA-A7DS	TCGA-FA-A7DS-01A-11D-A382-10	TCGA-FA-A7DS-10A-01D-A385-10
DLBC	TCGA-FA-A7Q1	TCGA-FA-A7Q1-01A-11D-A382-10	TCGA-FA-A7Q1-10A-01D-A385-10
DLBC	TCGA-FA-A82F	TCGA-FA-A82F-01A-11D-A382-10	TCGA-FA-A82F-10A-01D-A385-10
DLBC	TCGA-FA-A86F	TCGA-FA-A86F-01A-11D-A382-10	TCGA-FA-A86F-10A-01D-A385-10
DLBC	TCGA-FF-8041	TCGA-FF-8041-01A-11D-2210-10	TCGA-FF-8041-10A-01D-2210-10
DLBC	TCGA-FF-8042	TCGA-FF-8042-01A-11D-2210-10	TCGA-FF-8042-10A-01D-2210-10
DLBC	TCGA-FF-8043	TCGA-FF-8043-01A-11D-2210-10	TCGA-FF-8043-10A-01D-2210-10
DLBC	TCGA-FF-8046	TCGA-FF-8046-01A-11D-2210-10	TCGA-FF-8046-10A-01D-2210-10
DLBC	TCGA-FF-8047	TCGA-FF-8047-01A-11D-2210-10	TCGA-FF-8047-10A-01D-2210-10
DLBC	TCGA-FF-8061	TCGA-FF-8061-01A-11D-2210-10	TCGA-FF-8061-10A-01D-2210-10
DLBC	TCGA-FF-A7CQ	TCGA-FF-A7CQ-01A-11D-A382-10	TCGA-FF-A7CQ-10A-01D-A385-10
DLBC	TCGA-FF-A7CR	TCGA-FF-A7CR-01A-11D-A382-10	TCGA-FF-A7CR-10A-01D-A385-10
DLBC	TCGA-FF-A7CW	TCGA-FF-A7CW-01A-11D-A382-10	TCGA-FF-A7CW-10A-01D-A385-10
DLBC	TCGA-FF-A7CX	TCGA-FF-A7CX-01A-12D-A382-10	TCGA-FF-A7CX-10A-01D-A385-10
DLBC	TCGA-GR-A4D4	TCGA-GR-A4D4-01A-11D-A31X-10	TCGA-GR-A4D4-10A-01D-A31X-10
DLBC	TCGA-GR-A4D5	TCGA-GR-A4D5-01A-11D-A31X-10	TCGA-GR-A4D5-10A-01D-A31X-10
DLBC	TCGA-GR-A4D6	TCGA-GR-A4D6-01A-11D-A31X-10	TCGA-GR-A4D6-10A-01D-A31X-10
DLBC	TCGA-GR-A4D9	TCGA-GR-A4D9-01B-11D-A31X-10	TCGA-GR-A4D9-10A-01D-A31X-10
DLBC	TCGA-GS-A9TQ	TCGA-GS-A9TQ-01A-11D-A382-10	TCGA-GS-A9TQ-10A-01D-A385-10
DLBC	TCGA-GS-A9TT	TCGA-GS-A9TT-01A-11D-A382-10	TCGA-GS-A9TT-10A-01D-A385-10
DLBC	TCGA-GS-A9TU	TCGA-GS-A9TU-01A-11D-A382-10	TCGA-GS-A9TU-10A-01D-A385-10
DLBC	TCGA-GS-A9TV	TCGA-GS-A9TV-01A-11D-A382-10	TCGA-GS-A9TV-10A-01D-A385-10
DLBC	TCGA-GS-A9TW	TCGA-GS-A9TW-01A-11D-A382-10	TCGA-GS-A9TW-10A-01D-A385-10
DLBC	TCGA-GS-A9TX	TCGA-GS-A9TX-01A-11D-A382-10	TCGA-GS-A9TX-10A-01D-A385-10
DLBC	TCGA-GS-A9TY	TCGA-GS-A9TY-01A-11D-A38X-10	TCGA-GS-A9TY-10A-01D-A38X-10
DLBC	TCGA-GS-A9TZ	TCGA-GS-A9TZ-01A-11D-A38X-10	TCGA-GS-A9TZ-10A-01D-A38X-10
DLBC	TCGA-GS-A9U3	TCGA-GS-A9U3-01A-11D-A38X-10	TCGA-GS-A9U3-10A-01D-A38X-10
DLBC	TCGA-GS-A9U4	TCGA-GS-A9U4-01A-11D-A38X-10	TCGA-GS-A9U4-10A-01D-A38X-10
DLBC	TCGA-RQ-A68N	TCGA-RQ-A68N-01A-11D-A31X-10	TCGA-RQ-A68N-10A-01D-A31X-10
DLBC	TCGA-RQ-A6JB	TCGA-RQ-A6JB-01A-11D-A31X-10	TCGA-RQ-A6JB-10A-01D-A31X-10
DLBC	TCGA-RQ-AAAT	TCGA-RQ-AAAT-01A-11D-A38X-10	TCGA-RQ-AAAT-10A-01D-A38X-10
DLBC	TCGA-VB-A8QN	TCGA-VB-A8QN-01A-11D-A382-10	TCGA-VB-A8QN-10A-01D-A385-10

## Sheet: ESCA
TCGA Cancer type	CDR list	Tumor_Sample_Barcode	Matched_Norm_Sample_Barcode
ESCA	TCGA-2H-A9GF	TCGA-2H-A9GF-01A-11D-A37C-09	TCGA-2H-A9GF-11A-11D-A37F-09
ESCA	TCGA-2H-A9GH	TCGA-2H-A9GH-01A-11D-A37C-09	TCGA-2H-A9GH-11A-11D-A37F-09
ESCA	TCGA-2H-A9GI	TCGA-2H-A9GI-01A-11D-A37C-09	TCGA-2H-A9GI-11A-11D-A37F-09
ESCA	TCGA-2H-A9GJ	TCGA-2H-A9GJ-01A-11D-A37C-09	TCGA-2H-A9GJ-11A-11D-A37F-09
ESCA	TCGA-2H-A9GK	TCGA-2H-A9GK-01A-11D-A37C-09	TCGA-2H-A9GK-11A-11D-A37F-09
ESCA	TCGA-2H-A9GL	TCGA-2H-A9GL-01A-12D-A37C-09	TCGA-2H-A9GL-11A-11D-A37F-09
ESCA	TCGA-2H-A9GM	TCGA-2H-A9GM-01A-11D-A37C-09	TCGA-2H-A9GM-11A-11D-A37F-09
ESCA	TCGA-2H-A9GN	TCGA-2H-A9GN-01A-11D-A37C-09	TCGA-2H-A9GN-11A-11D-A37F-09
ESCA	TCGA-2H-A9GO	TCGA-2H-A9GO-01A-11D-A37C-09	TCGA-2H-A9GO-11A-11D-A37F-09
ESCA	TCGA-2H-A9GQ	TCGA-2H-A9GQ-01A-11D-A37C-09	TCGA-2H-A9GQ-11A-11D-A37F-09
ESCA	TCGA-2H-A9GR	TCGA-2H-A9GR-01A-12D-A37C-09	TCGA-2H-A9GR-11A-11D-A37F-09
ESCA	TCGA-IC-A6RE	TCGA-IC-A6RE-01A-11D-A33E-09	TCGA-IC-A6RE-10A-01D-A33H-09
ESCA	TCGA-IC-A6RF	TCGA-IC-A6RF-01A-13D-A33E-09	TCGA-IC-A6RF-10A-21D-A33H-09
ESCA	TCGA-IG-A3I8	TCGA-IG-A3I8-01A-11D-A247-09	TCGA-IG-A3I8-10A-01D-A247-09
ESCA	TCGA-IG-A3QL	TCGA-IG-A3QL-01A-11D-A247-09	TCGA-IG-A3QL-10A-01D-A247-09
ESCA	TCGA-IG-A3Y9	TCGA-IG-A3Y9-01A-12D-A247-09	TCGA-IG-A3Y9-10A-01D-A247-09
ESCA	TCGA-IG-A3YA	TCGA-IG-A3YA-01A-11D-A247-09	TCGA-IG-A3YA-10A-01D-A247-09
ESCA	TCGA-IG-A3YB	TCGA-IG-A3YB-01A-11D-A247-09	TCGA-IG-A3YB-10A-01D-A247-09
ESCA	TCGA-IG-A3YC	TCGA-IG-A3YC-01A-11D-A247-09	TCGA-IG-A3YC-10A-01D-A247-09
ESCA	TCGA-IG-A4P3	TCGA-IG-A4P3-01A-11D-A27G-09	TCGA-IG-A4P3-10A-01D-A27G-09
ESCA	TCGA-IG-A4QS	TCGA-IG-A4QS-01A-11D-A27G-09	TCGA-IG-A4QS-10A-01D-A27G-09
ESCA	TCGA-IG-A4QT	TCGA-IG-A4QT-01A-21D-A27G-09	TCGA-IG-A4QT-10A-02D-A27G-09
ESCA	TCGA-IG-A50L	TCGA-IG-A50L-01A-11D-A27G-09	TCGA-IG-A50L-10A-01D-A27G-09
ESCA	TCGA-IG-A51D	TCGA-IG-A51D-01A-11D-A27G-09	TCGA-IG-A51D-10A-01D-A27G-09
ESCA	TCGA-IG-A5B8	TCGA-IG-A5B8-01A-11D-A28B-09	TCGA-IG-A5B8-10A-01D-A28E-09
ESCA	TCGA-IG-A5S3	TCGA-IG-A5S3-01A-11D-A28B-09	TCGA-IG-A5S3-10A-01D-A28E-09
ESCA	TCGA-IG-A625	TCGA-IG-A625-01A-11D-A31U-09	TCGA-IG-A625-10A-01D-A31U-09
ESCA	TCGA-IG-A6QS	TCGA-IG-A6QS-01A-12D-A33E-09	TCGA-IG-A6QS-10B-01D-A33H-09
ESCA	TCGA-IG-A7DP	TCGA-IG-A7DP-01A-31D-A33E-09	TCGA-IG-A7DP-10A-01D-A33H-09
ESCA	TCGA-IG-A8O2	TCGA-IG-A8O2-01A-11D-A36J-09	TCGA-IG-A8O2-10A-01D-A36M-09
ESCA	TCGA-IG-A97H	TCGA-IG-A97H-01A-11D-A387-09	TCGA-IG-A97H-10A-01D-A38A-09
ESCA	TCGA-IG-A97I	TCGA-IG-A97I-01A-11D-A387-09	TCGA-IG-A97I-10A-01D-A38A-09
ESCA	TCGA-JY-A6F8	TCGA-JY-A6F8-01A-11D-A33E-09	TCGA-JY-A6F8-10A-01D-A33H-09
ESCA	TCGA-JY-A6FA	TCGA-JY-A6FA-01A-11D-A33E-09	TCGA-JY-A6FA-10A-01D-A33H-09
ESCA	TCGA-JY-A6FB	TCGA-JY-A6FB-01A-11D-A33E-09	TCGA-JY-A6FB-10A-01D-A33H-09
ESCA	TCGA-JY-A6FD	TCGA-JY-A6FD-01A-11D-A33E-09	TCGA-JY-A6FD-10A-01D-A33H-09
ESCA	TCGA-JY-A6FE	TCGA-JY-A6FE-01A-11D-A33E-09	TCGA-JY-A6FE-10A-01D-A33H-09
ESCA	TCGA-JY-A6FG	TCGA-JY-A6FG-01A-11D-A33E-09	TCGA-JY-A6FG-10A-01D-A33H-09
ESCA	TCGA-JY-A6FH	TCGA-JY-A6FH-01A-11D-A33E-09	TCGA-JY-A6FH-10A-01D-A33H-09
ESCA	TCGA-JY-A938	TCGA-JY-A938-01A-11D-A37C-09	TCGA-JY-A938-10A-01D-A37F-09
ESCA	TCGA-JY-A939	TCGA-JY-A939-01A-12D-A37C-09	TCGA-JY-A939-10A-01D-A37F-09
ESCA	TCGA-JY-A93C	TCGA-JY-A93C-01A-11D-A387-09	TCGA-JY-A93C-10A-01D-A38A-09
ESCA	TCGA-JY-A93D	TCGA-JY-A93D-01A-11D-A387-09	TCGA-JY-A93D-10A-01D-A38A-09
ESCA	TCGA-JY-A93E	TCGA-JY-A93E-01A-11D-A37C-09	TCGA-JY-A93E-10A-01D-A37F-09
ESCA	TCGA-JY-A93F	TCGA-JY-A93F-01A-21D-A37C-09	TCGA-JY-A93F-10A-01D-A37F-09
ESCA	TCGA-KH-A6WC	TCGA-KH-A6WC-01A-11D-A33E-09	TCGA-KH-A6WC-10B-01D-A33H-09
ESCA	TCGA-L5-A43C	TCGA-L5-A43C-01A-11D-A247-09	TCGA-L5-A43C-11A-11D-A247-09
ESCA	TCGA-L5-A43E	TCGA-L5-A43E-01A-11D-A247-09	TCGA-L5-A43E-10A-01D-A247-09
ESCA	TCGA-L5-A43H	TCGA-L5-A43H-01A-11D-A247-09	TCGA-L5-A43H-11A-11D-A247-09
ESCA	TCGA-L5-A43I	TCGA-L5-A43I-01A-11D-A247-09	TCGA-L5-A43I-11A-11D-A247-09
ESCA	TCGA-L5-A43J	TCGA-L5-A43J-01A-12D-A247-09	TCGA-L5-A43J-11A-11D-A247-09
ESCA	TCGA-L5-A43M	TCGA-L5-A43M-01A-11D-A247-09	TCGA-L5-A43M-11A-11D-A247-09
ESCA	TCGA-L5-A4OE	TCGA-L5-A4OE-01A-11D-A27G-09	TCGA-L5-A4OE-11A-11D-A27G-09
ESCA	TCGA-L5-A4OF	TCGA-L5-A4OF-01A-11D-A27G-09	TCGA-L5-A4OF-11A-12D-A27G-09
ESCA	TCGA-L5-A4OG	TCGA-L5-A4OG-01A-11D-A27G-09	TCGA-L5-A4OG-11A-12D-A27G-09
ESCA	TCGA-L5-A4OH	TCGA-L5-A4OH-01A-11D-A27G-09	TCGA-L5-A4OH-11A-11D-A27G-09
ESCA	TCGA-L5-A4OI	TCGA-L5-A4OI-01A-11D-A27G-09	TCGA-L5-A4OI-11A-11D-A27G-09
ESCA	TCGA-L5-A4OJ	TCGA-L5-A4OJ-01A-11D-A27G-09	TCGA-L5-A4OJ-11A-12D-A27G-09
ESCA	TCGA-L5-A4OM	TCGA-L5-A4OM-01A-11D-A27G-09	TCGA-L5-A4OM-11A-11D-A27G-09
ESCA	TCGA-L5-A4ON	TCGA-L5-A4ON-01A-11D-A27G-09	TCGA-L5-A4ON-11A-21D-A27G-09
ESCA	TCGA-L5-A4OO	TCGA-L5-A4OO-01A-11D-A27G-09	TCGA-L5-A4OO-11A-12D-A27G-09
ESCA	TCGA-L5-A4OP	TCGA-L5-A4OP-01A-11D-A27G-09	TCGA-L5-A4OP-11A-11D-A27G-09
ESCA	TCGA-L5-A4OQ	TCGA-L5-A4OQ-01A-11D-A27G-09	TCGA-L5-A4OQ-11A-12D-A27G-09
ESCA	TCGA-L5-A4OR	TCGA-L5-A4OR-01A-11D-A27G-09	TCGA-L5-A4OR-11A-11D-A27G-09
ESCA	TCGA-L5-A4OS	TCGA-L5-A4OS-01A-11D-A28B-09	TCGA-L5-A4OS-11A-11D-A28E-09
ESCA	TCGA-L5-A4OT	TCGA-L5-A4OT-01A-11D-A28B-09	TCGA-L5-A4OT-11A-11D-A28E-09
ESCA	TCGA-L5-A4OU	TCGA-L5-A4OU-01A-11D-A28B-09	TCGA-L5-A4OU-11A-11D-A28E-09
ESCA	TCGA-L5-A4OW	TCGA-L5-A4OW-01A-11D-A28B-09	TCGA-L5-A4OW-11A-11D-A28E-09
ESCA	TCGA-L5-A4OX	TCGA-L5-A4OX-01A-21D-A28B-09	TCGA-L5-A4OX-11A-13D-A28E-09
ESCA	TCGA-L5-A88S	TCGA-L5-A88S-01A-11D-A36J-09	TCGA-L5-A88S-11A-21D-A36M-09
ESCA	TCGA-L5-A88T	TCGA-L5-A88T-01A-11D-A351-09	TCGA-L5-A88T-11A-11D-A351-09
ESCA	TCGA-L5-A88V	TCGA-L5-A88V-01A-11D-A351-09	TCGA-L5-A88V-11A-11D-A351-09
ESCA	TCGA-L5-A88W	TCGA-L5-A88W-01A-11D-A351-09	TCGA-L5-A88W-11A-11D-A351-09
ESCA	TCGA-L5-A88Y	TCGA-L5-A88Y-01A-11D-A351-09	TCGA-L5-A88Y-11A-11D-A351-09
ESCA	TCGA-L5-A88Z	TCGA-L5-A88Z-01A-11D-A36J-09	TCGA-L5-A88Z-11A-11D-A36M-09
ESCA	TCGA-L5-A891	TCGA-L5-A891-01A-11D-A36J-09	TCGA-L5-A891-11A-21D-A36M-09
ESCA	TCGA-L5-A893	TCGA-L5-A893-01A-11D-A36J-09	TCGA-L5-A893-11A-21D-A36M-09
ESCA	TCGA-L5-A8NE	TCGA-L5-A8NE-01A-11D-A37C-09	TCGA-L5-A8NE-11A-11D-A37F-09
ESCA	TCGA-L5-A8NF	TCGA-L5-A8NF-01A-11D-A37C-09	TCGA-L5-A8NF-11A-11D-A37F-09
ESCA	TCGA-L5-A8NG	TCGA-L5-A8NG-01A-11D-A37C-09	TCGA-L5-A8NG-11A-11D-A37F-09
ESCA	TCGA-L5-A8NH	TCGA-L5-A8NH-01A-11D-A37C-09	TCGA-L5-A8NH-11A-11D-A37F-09
ESCA	TCGA-L5-A8NI	TCGA-L5-A8NI-01A-11D-A37C-09	TCGA-L5-A8NI-11A-11D-A37F-09
ESCA	TCGA-L5-A8NJ	TCGA-L5-A8NJ-01A-11D-A36J-09	TCGA-L5-A8NJ-11A-11D-A36M-09
ESCA	TCGA-L5-A8NK	TCGA-L5-A8NK-01A-21D-A37C-09	TCGA-L5-A8NK-11A-11D-A37F-09
ESCA	TCGA-L5-A8NL	TCGA-L5-A8NL-01A-12D-A37C-09	TCGA-L5-A8NL-11A-12D-A37F-09
ESCA	TCGA-L5-A8NM	TCGA-L5-A8NM-01A-11D-A37C-09	TCGA-L5-A8NM-11A-12D-A37F-09
ESCA	TCGA-L5-A8NN	TCGA-L5-A8NN-01A-11D-A37C-09	TCGA-L5-A8NN-11A-11D-A37F-09
ESCA	TCGA-L5-A8NQ	TCGA-L5-A8NQ-01A-11D-A36J-09	TCGA-L5-A8NQ-11A-11D-A36M-09
ESCA	TCGA-L5-A8NR	TCGA-L5-A8NR-01A-11D-A37C-09	TCGA-L5-A8NR-11A-11D-A37F-09
ESCA	TCGA-L5-A8NS	TCGA-L5-A8NS-01A-12D-A37C-09	TCGA-L5-A8NS-11A-11D-A37F-09
ESCA	TCGA-L5-A8NT	TCGA-L5-A8NT-01A-11D-A37C-09	TCGA-L5-A8NT-11A-11D-A37F-09
ESCA	TCGA-L5-A8NU	TCGA-L5-A8NU-01A-11D-A36J-09	TCGA-L5-A8NU-11A-11D-A36M-09
ESCA	TCGA-L5-A8NV	TCGA-L5-A8NV-01A-11D-A37C-09	TCGA-L5-A8NV-11A-11D-A37F-09
ESCA	TCGA-L5-A8NW	TCGA-L5-A8NW-01A-11D-A37C-09	TCGA-L5-A8NW-11A-11D-A37F-09
ESCA	TCGA-L7-A56G	TCGA-L7-A56G-01A-21D-A27G-09	TCGA-L7-A56G-10A-01D-A27G-09
ESCA	TCGA-L7-A6VZ	TCGA-L7-A6VZ-01A-12D-A33E-09	TCGA-L7-A6VZ-10A-01D-A33H-09
ESCA	TCGA-LN-A49K	TCGA-LN-A49K-01A-11D-A247-09	TCGA-LN-A49K-10A-01D-A247-09
ESCA	TCGA-LN-A49L	TCGA-LN-A49L-01A-11D-A247-09	TCGA-LN-A49L-10A-01D-A247-09
ESCA	TCGA-LN-A49M	TCGA-LN-A49M-01A-21D-A27G-09	TCGA-LN-A49M-10A-01D-A27G-09
ESCA	TCGA-LN-A49N	TCGA-LN-A49N-01A-11D-A247-09	TCGA-LN-A49N-10A-01D-A247-09
ESCA	TCGA-LN-A49O	TCGA-LN-A49O-01A-11D-A247-09	TCGA-LN-A49O-10A-01D-A247-09
ESCA	TCGA-LN-A49P	TCGA-LN-A49P-01A-11D-A247-09	TCGA-LN-A49P-10A-01D-A247-09
ESCA	TCGA-LN-A49R	TCGA-LN-A49R-01A-11D-A247-09	TCGA-LN-A49R-10A-01D-A247-09
ESCA	TCGA-LN-A49S	TCGA-LN-A49S-01A-11D-A247-09	TCGA-LN-A49S-10A-01D-A247-09
ESCA	TCGA-LN-A49U	TCGA-LN-A49U-01A-31D-A27G-09	TCGA-LN-A49U-10A-01D-A27G-09
ESCA	TCGA-LN-A49V	TCGA-LN-A49V-01A-11D-A247-09	TCGA-LN-A49V-10A-01D-A247-09
ESCA	TCGA-LN-A49W	TCGA-LN-A49W-01A-11D-A27G-09	TCGA-LN-A49W-10A-01D-A27G-09
ESCA	TCGA-LN-A49X	TCGA-LN-A49X-01A-31D-A27G-09	TCGA-LN-A49X-10A-01D-A27G-09
ESCA	TCGA-LN-A49Y	TCGA-LN-A49Y-01A-11D-A27G-09	TCGA-LN-A49Y-10A-01D-A27G-09
ESCA	TCGA-LN-A4A1	TCGA-LN-A4A1-01A-21D-A27G-09	TCGA-LN-A4A1-10A-01D-A27G-09
ESCA	TCGA-LN-A4A2	TCGA-LN-A4A2-01A-31D-A27G-09	TCGA-LN-A4A2-10A-01D-A27G-09
ESCA	TCGA-LN-A4A3	TCGA-LN-A4A3-01A-11D-A27G-09	TCGA-LN-A4A3-10A-01D-A27G-09
ESCA	TCGA-LN-A4A4	TCGA-LN-A4A4-01A-11D-A27G-09	TCGA-LN-A4A4-10A-01D-A27G-09
ESCA	TCGA-LN-A4A5	TCGA-LN-A4A5-01A-21D-A27G-09	TCGA-LN-A4A5-10A-01D-A27G-09
ESCA	TCGA-LN-A4A6	TCGA-LN-A4A6-01A-11D-A27G-09	TCGA-LN-A4A6-10A-01D-A27G-09
ESCA	TCGA-LN-A4A8	TCGA-LN-A4A8-01A-32D-A27G-09	TCGA-LN-A4A8-10A-01D-A27G-09
ESCA	TCGA-LN-A4A9	TCGA-LN-A4A9-01A-11D-A28B-09	TCGA-LN-A4A9-10A-01D-A28E-09
ESCA	TCGA-LN-A4MQ	TCGA-LN-A4MQ-01A-11D-A28B-09	TCGA-LN-A4MQ-10A-01D-A28E-09
ESCA	TCGA-LN-A4MR	TCGA-LN-A4MR-01A-11D-A28B-09	TCGA-LN-A4MR-10A-01D-A28E-09
ESCA	TCGA-LN-A5U5	TCGA-LN-A5U5-01A-21D-A28B-09	TCGA-LN-A5U5-10A-01D-A28E-09
ESCA	TCGA-LN-A5U6	TCGA-LN-A5U6-01A-11D-A28B-09	TCGA-LN-A5U6-10A-01D-A28E-09
ESCA	TCGA-LN-A5U7	TCGA-LN-A5U7-01A-11D-A31U-09	TCGA-LN-A5U7-10A-01D-A31U-09
ESCA	TCGA-LN-A7HV	TCGA-LN-A7HV-01A-21D-A351-09	TCGA-LN-A7HV-10A-01D-A351-09
ESCA	TCGA-LN-A7HW	TCGA-LN-A7HW-01A-22D-A351-09	TCGA-LN-A7HW-10A-01D-A351-09
ESCA	TCGA-LN-A7HX	TCGA-LN-A7HX-01A-11D-A33E-09	TCGA-LN-A7HX-10A-01D-A33H-09
ESCA	TCGA-LN-A7HY	TCGA-LN-A7HY-01A-12D-A351-09	TCGA-LN-A7HY-10A-01D-A351-09
ESCA	TCGA-LN-A7HZ	TCGA-LN-A7HZ-01A-31D-A351-09	TCGA-LN-A7HZ-10A-01D-A351-09
ESCA	TCGA-LN-A8HZ	TCGA-LN-A8HZ-01A-11D-A36J-09	TCGA-LN-A8HZ-10A-01D-A36M-09
ESCA	TCGA-LN-A8I0	TCGA-LN-A8I0-01A-11D-A36J-09	TCGA-LN-A8I0-10A-01D-A36M-09
ESCA	TCGA-LN-A8I1	TCGA-LN-A8I1-01A-11D-A36J-09	TCGA-LN-A8I1-10A-01D-A36M-09
ESCA	TCGA-LN-A9FO	TCGA-LN-A9FO-01A-11D-A387-09	TCGA-LN-A9FO-10A-01D-A38A-09
ESCA	TCGA-LN-A9FP	TCGA-LN-A9FP-01A-31D-A387-09	TCGA-LN-A9FP-10A-01D-A38A-09
ESCA	TCGA-LN-A9FQ	TCGA-LN-A9FQ-01A-31D-A387-09	TCGA-LN-A9FQ-10A-01D-A38A-09
ESCA	TCGA-LN-A9FR	TCGA-LN-A9FR-01A-11D-A387-09	TCGA-LN-A9FR-10A-01D-A38A-09
ESCA	TCGA-M9-A5M8	TCGA-M9-A5M8-01A-11D-A28B-09	TCGA-M9-A5M8-10A-01D-A28E-09
ESCA	TCGA-Q9-A6FU	TCGA-Q9-A6FU-01A-11D-A31U-09	TCGA-Q9-A6FU-10A-01D-A31U-09
ESCA	TCGA-Q9-A6FW	TCGA-Q9-A6FW-01A-31D-A31U-09	TCGA-Q9-A6FW-10A-01D-A31U-09
ESCA	TCGA-R6-A6DN	TCGA-R6-A6DN-01B-11D-A31U-09	TCGA-R6-A6DN-10A-01D-A31U-09
ESCA	TCGA-R6-A6DQ	TCGA-R6-A6DQ-01B-11D-A31U-09	TCGA-R6-A6DQ-10A-01D-A31U-09
ESCA	TCGA-R6-A6KZ	TCGA-R6-A6KZ-01A-11D-A31U-09	TCGA-R6-A6KZ-10A-01D-A31U-09
ESCA	TCGA-R6-A6L4	TCGA-R6-A6L4-01A-11D-A31U-09	TCGA-R6-A6L4-10A-01D-A31U-09
ESCA	TCGA-R6-A6L6	TCGA-R6-A6L6-01B-11D-A33E-09	TCGA-R6-A6L6-10A-01D-A33H-09
ESCA	TCGA-R6-A6XG	TCGA-R6-A6XG-01B-11D-A33E-09	TCGA-R6-A6XG-10A-01D-A33H-09
ESCA	TCGA-R6-A6XQ	TCGA-R6-A6XQ-01B-11D-A33E-09	TCGA-R6-A6XQ-10A-01D-A33H-09
ESCA	TCGA-R6-A6Y0	TCGA-R6-A6Y0-01B-11D-A33E-09	TCGA-R6-A6Y0-10A-01D-A33H-09
ESCA	TCGA-R6-A6Y2	TCGA-R6-A6Y2-01B-11D-A33E-09	TCGA-R6-A6Y2-10A-01D-A33H-09
ESCA	TCGA-R6-A8W5	TCGA-R6-A8W5-01B-11D-A37C-09	TCGA-R6-A8W5-10A-01D-A37F-09
ESCA	TCGA-R6-A8W8	TCGA-R6-A8W8-01B-11D-A37C-09	TCGA-R6-A8W8-10A-01D-A37F-09
ESCA	TCGA-R6-A8WC	TCGA-R6-A8WC-01A-11D-A37C-09	TCGA-R6-A8WC-10A-01D-A37F-09
ESCA	TCGA-R6-A8WG	TCGA-R6-A8WG-01A-11D-A37C-09	TCGA-R6-A8WG-10A-01D-A37F-09
ESCA	TCGA-RE-A7BO	TCGA-RE-A7BO-01A-11D-A33E-09	TCGA-RE-A7BO-10A-01D-A33H-09
ESCA	TCGA-S8-A6BV	TCGA-S8-A6BV-01A-21D-A31U-09	TCGA-S8-A6BV-10A-01D-A31U-09
ESCA	TCGA-S8-A6BW	TCGA-S8-A6BW-01A-11D-A31U-09	TCGA-S8-A6BW-10A-01D-A31U-09
ESCA	TCGA-V5-A7RB	TCGA-V5-A7RB-01A-11D-A351-09	TCGA-V5-A7RB-10A-01D-A351-09
ESCA	TCGA-V5-A7RE	TCGA-V5-A7RE-01A-11D-A351-09	TCGA-V5-A7RE-10A-01D-A351-09
ESCA	TCGA-V5-AASV	TCGA-V5-AASV-01A-11D-A387-09	TCGA-V5-AASV-10A-01D-A38A-09
ESCA	TCGA-V5-AASW	TCGA-V5-AASW-01A-11D-A403-09	TCGA-V5-AASW-10A-01D-A403-09
ESCA	TCGA-V5-AASX	TCGA-V5-AASX-01A-11D-A387-09	TCGA-V5-AASX-10A-01D-A38A-09
ESCA	TCGA-VR-A8EO	TCGA-VR-A8EO-01A-11D-A36J-09	TCGA-VR-A8EO-10A-01D-A36M-09
ESCA	TCGA-VR-A8EP	TCGA-VR-A8EP-01A-31D-A403-09	TCGA-VR-A8EP-10B-01D-A403-09
ESCA	TCGA-VR-A8EQ	TCGA-VR-A8EQ-01A-11D-A36J-09	TCGA-VR-A8EQ-10A-01D-A36M-09
ESCA	TCGA-VR-A8ER	TCGA-VR-A8ER-01A-11D-A36J-09	TCGA-VR-A8ER-10A-01D-A36M-09
ESCA	TCGA-VR-A8ET	TCGA-VR-A8ET-01A-11D-A403-09	TCGA-VR-A8ET-10B-01D-A403-09
ESCA	TCGA-VR-A8EU	TCGA-VR-A8EU-01A-11D-A36J-09	TCGA-VR-A8EU-10A-01D-A36M-09
ESCA	TCGA-VR-A8EW	TCGA-VR-A8EW-01A-11D-A36J-09	TCGA-VR-A8EW-10A-01D-A36M-09
ESCA	TCGA-VR-A8EX	TCGA-VR-A8EX-01A-11D-A36J-09	TCGA-VR-A8EX-10A-01D-A36M-09
ESCA	TCGA-VR-A8EY	TCGA-VR-A8EY-01A-11D-A36J-09	TCGA-VR-A8EY-10A-01D-A36M-09
ESCA	TCGA-VR-A8EZ	TCGA-VR-A8EZ-01A-11D-A36J-09	TCGA-VR-A8EZ-10A-01D-A36M-09
ESCA	TCGA-VR-A8Q7	TCGA-VR-A8Q7-01A-11D-A37C-09	TCGA-VR-A8Q7-10A-01D-A37F-09
ESCA	TCGA-VR-AA4D	TCGA-VR-AA4D-01A-11D-A37C-09	TCGA-VR-AA4D-10A-01D-A37F-09
ESCA	TCGA-VR-AA4G	TCGA-VR-AA4G-01A-11D-A37C-09	TCGA-VR-AA4G-10A-01D-A37F-09
ESCA	TCGA-VR-AA7B	TCGA-VR-AA7B-01A-31D-A403-09	TCGA-VR-AA7B-10A-01D-A403-09
ESCA	TCGA-VR-AA7D	TCGA-VR-AA7D-01A-11D-A403-09	TCGA-VR-AA7D-10A-01D-A403-09
ESCA	TCGA-VR-AA7I	TCGA-VR-AA7I-01A-11D-A403-09	TCGA-VR-AA7I-10A-01D-A403-09
ESCA	TCGA-X8-AAAR	TCGA-X8-AAAR-01A-11D-A403-09	TCGA-X8-AAAR-10A-01D-A403-09
ESCA	TCGA-XP-A8T6	TCGA-XP-A8T6-01A-11D-A36J-09	TCGA-XP-A8T6-10A-01D-A36M-09
ESCA	TCGA-XP-A8T7	TCGA-XP-A8T7-01A-11D-A36J-09	TCGA-XP-A8T7-10A-01D-A36M-09
ESCA	TCGA-XP-A8T8	TCGA-XP-A8T8-01A-11D-A36J-09	TCGA-XP-A8T8-10A-01D-A36M-09
ESCA	TCGA-Z6-A8JD	TCGA-Z6-A8JD-01A-11D-A36J-09	TCGA-Z6-A8JD-10A-01D-A36M-09
ESCA	TCGA-Z6-A8JE	TCGA-Z6-A8JE-01A-11D-A37C-09	TCGA-Z6-A8JE-10A-01D-A37F-09
ESCA	TCGA-Z6-A9VB	TCGA-Z6-A9VB-01A-21D-A37C-09	TCGA-Z6-A9VB-10A-01D-A37F-09
ESCA	TCGA-Z6-AAPN	TCGA-Z6-AAPN-01A-11D-A403-09	TCGA-Z6-AAPN-10A-01D-A403-09
ESCA	TCGA-ZR-A9CJ	TCGA-ZR-A9CJ-01B-11D-A387-09	TCGA-ZR-A9CJ-10A-01D-A38A-09

## Sheet: GBM
cancer type	CDR list	Tumor_Sample_Barcode	Matched_Norm_Sample_Barcode
GBM	TCGA-02-0003	TCGA-02-0003-01A-01D-1490-08	TCGA-02-0003-10A-01D-1490-08
GBM	TCGA-02-0033	TCGA-02-0033-01A-01D-1490-08	TCGA-02-0033-10A-01D-1490-08
GBM	TCGA-02-0047	TCGA-02-0047-01A-01D-1490-08	TCGA-02-0047-10A-01D-1490-08
GBM	TCGA-02-0055	TCGA-02-0055-01A-01D-1490-08	TCGA-02-0055-10A-01D-1490-08
GBM	TCGA-02-2466	TCGA-02-2466-01A-01W-0837-08	TCGA-02-2466-10A-01W-0837-08
GBM	TCGA-02-2470	TCGA-02-2470-01A-01D-1494-08	TCGA-02-2470-10A-01D-1494-08
GBM	TCGA-02-2483	TCGA-02-2483-01A-01D-1494-08	TCGA-02-2483-10A-01D-1494-08
GBM	TCGA-02-2485	TCGA-02-2485-01A-01D-1494-08	TCGA-02-2485-10A-01D-1494-08
GBM	TCGA-02-2486	TCGA-02-2486-01A-01D-1494-08	TCGA-02-2486-10A-01D-1494-08
GBM	TCGA-06-0119	TCGA-06-0119-01A-08D-1490-08	TCGA-06-0119-10A-01D-1490-08
GBM	TCGA-06-0122	TCGA-06-0122-01A-01D-1490-08	TCGA-06-0122-10A-01D-1490-08
GBM	TCGA-06-0124	TCGA-06-0124-01A-01D-1490-08	TCGA-06-0124-10A-01D-1490-08
GBM	TCGA-06-0125	TCGA-06-0125-01A-01D-1490-08	TCGA-06-0125-10A-01D-1490-08
GBM	TCGA-06-0126	TCGA-06-0126-01A-01D-1490-08	TCGA-06-0126-10A-01D-1490-08
GBM	TCGA-06-0128	TCGA-06-0128-01A-01D-1490-08	TCGA-06-0128-10A-01D-1490-08
GBM	TCGA-06-0129	TCGA-06-0129-01A-01D-1490-08	TCGA-06-0129-10A-01D-1490-08
GBM	TCGA-06-0130	TCGA-06-0130-01A-01D-1490-08	TCGA-06-0130-10A-01D-1490-08
GBM	TCGA-06-0132	TCGA-06-0132-01A-02D-1491-08	TCGA-06-0132-10A-01D-1491-08
GBM	TCGA-06-0137	TCGA-06-0137-01A-01D-1490-08	TCGA-06-0137-10A-01D-1490-08
GBM	TCGA-06-0139	TCGA-06-0139-01A-01D-1490-08	TCGA-06-0139-10A-01D-1490-08
GBM	TCGA-06-0140	TCGA-06-0140-01A-01D-1490-08	TCGA-06-0140-10A-01D-1490-08
GBM	TCGA-06-0141	TCGA-06-0141-01A-01D-1490-08	TCGA-06-0141-10A-01D-1490-08
GBM	TCGA-06-0142	TCGA-06-0142-01A-01D-1490-08	TCGA-06-0142-10A-01D-1490-08
GBM	TCGA-06-0145	TCGA-06-0145-01A-01D-1490-08	TCGA-06-0145-10A-01D-1490-08
GBM	TCGA-06-0151	TCGA-06-0151-01A-01D-1491-08	TCGA-06-0151-10A-01D-1491-08
GBM	TCGA-06-0152	TCGA-06-0152-01A-02D-1492-08	TCGA-06-0152-10A-01D-1492-08
GBM	TCGA-06-0154	TCGA-06-0154-01A-03D-1491-08	TCGA-06-0154-10A-01D-1491-08
GBM	TCGA-06-0155	TCGA-06-0155-01B-01D-1492-08	TCGA-06-0155-10A-01D-1492-08
GBM	TCGA-06-0157	TCGA-06-0157-01A-01D-1491-08	TCGA-06-0157-10A-01D-1491-08
GBM	TCGA-06-0158	TCGA-06-0158-01A-01D-1491-08	TCGA-06-0158-10A-01D-1491-08
GBM	TCGA-06-0166	TCGA-06-0166-01A-01D-1491-08	TCGA-06-0166-10A-01D-1491-08
GBM	TCGA-06-0167	TCGA-06-0167-01A-01D-1491-08	TCGA-06-0167-10A-01D-1491-08
GBM	TCGA-06-0168	TCGA-06-0168-01A-01D-1491-08	TCGA-06-0168-10A-01D-1491-08
GBM	TCGA-06-0169	TCGA-06-0169-01A-01D-1490-08	TCGA-06-0169-10A-01D-1490-08
GBM	TCGA-06-0171	TCGA-06-0171-01A-02D-1491-08	TCGA-06-0171-10A-01D-1491-08
GBM	TCGA-06-0173	TCGA-06-0173-01A-01D-1491-08	TCGA-06-0173-10B-01D-1491-08
GBM	TCGA-06-0174	TCGA-06-0174-01A-01D-1491-08	TCGA-06-0174-10B-01D-1491-08
GBM	TCGA-06-0184	TCGA-06-0184-01A-01D-1491-08	TCGA-06-0184-10B-01D-1491-08
GBM	TCGA-06-0185	TCGA-06-0185-01A-01D-1491-08	TCGA-06-0185-10B-01D-1491-08
GBM	TCGA-06-0187	TCGA-06-0187-01A-01D-1491-08	TCGA-06-0187-10B-01D-1491-08
GBM	TCGA-06-0188	TCGA-06-0188-01A-01D-1491-08	TCGA-06-0188-10B-01D-1491-08
GBM	TCGA-06-0189	TCGA-06-0189-01A-01D-1491-08	TCGA-06-0189-10A-01D-1491-08
GBM	TCGA-06-0190	TCGA-06-0190-01A-01D-1491-08	TCGA-06-0190-10B-01D-1491-08
GBM	TCGA-06-0192	TCGA-06-0192-01B-01D-1492-08	TCGA-06-0192-10A-01D-1492-08
GBM	TCGA-06-0195	TCGA-06-0195-01B-01D-1491-08	TCGA-06-0195-10A-01D-1491-08
GBM	TCGA-06-0210	TCGA-06-0210-01B-01D-1491-08	TCGA-06-0210-10A-01D-1491-08
GBM	TCGA-06-0211	TCGA-06-0211-01B-01D-1491-08	TCGA-06-0211-10A-01D-1491-08
GBM	TCGA-06-0213	TCGA-06-0213-01A-01D-1491-08	TCGA-06-0213-10A-01D-1491-08
GBM	TCGA-06-0214	TCGA-06-0214-01A-02D-1491-08	TCGA-06-0214-10A-01D-1491-08
GBM	TCGA-06-0216	TCGA-06-0216-01B-01D-1492-08	TCGA-06-0216-10A-01D-1492-08
GBM	TCGA-06-0219	TCGA-06-0219-01A-01D-1491-08	TCGA-06-0219-10A-01D-1491-08
GBM	TCGA-06-0221	TCGA-06-0221-01A-01D-1491-08	TCGA-06-0221-10A-01D-1491-08
GBM	TCGA-06-0237	TCGA-06-0237-01A-02D-1491-08	TCGA-06-0237-10A-01D-1491-08
GBM	TCGA-06-0238	TCGA-06-0238-01A-02D-1492-08	TCGA-06-0238-10A-01D-1492-08
GBM	TCGA-06-0240	TCGA-06-0240-01A-03D-1491-08	TCGA-06-0240-10A-01D-1491-08
GBM	TCGA-06-0241	TCGA-06-0241-01A-02D-1491-08	TCGA-06-0241-10A-01D-1491-08
GBM	TCGA-06-0644	TCGA-06-0644-01A-02D-1492-08	TCGA-06-0644-10A-01D-1492-08
GBM	TCGA-06-0645	TCGA-06-0645-01A-01D-1492-08	TCGA-06-0645-10A-01D-1492-08
GBM	TCGA-06-0646	TCGA-06-0646-01A-01D-1492-08	TCGA-06-0646-10A-01D-1492-08
GBM	TCGA-06-0648	TCGA-06-0648-01A-01D-1492-08	TCGA-06-0648-10A-01D-1492-08
GBM	TCGA-06-0649	TCGA-06-0649-01B-01D-1492-08	TCGA-06-0649-10A-01D-1492-08
GBM	TCGA-06-0650	TCGA-06-0650-01A-02D-1696-08	TCGA-06-0650-10A-01D-1696-08
GBM	TCGA-06-0686	TCGA-06-0686-01A-01D-1492-08	TCGA-06-0686-10A-01D-1492-08
GBM	TCGA-06-0743	TCGA-06-0743-01A-01D-1492-08	TCGA-06-0743-10A-01D-1492-08
GBM	TCGA-06-0744	TCGA-06-0744-01A-01D-1492-08	TCGA-06-0744-10A-01D-1492-08
GBM	TCGA-06-0745	TCGA-06-0745-01A-01D-1492-08	TCGA-06-0745-10A-01D-1492-08
GBM	TCGA-06-0747	TCGA-06-0747-01A-01D-1492-08	TCGA-06-0747-10A-01D-1492-08
GBM	TCGA-06-0749	TCGA-06-0749-01A-01D-1492-08	TCGA-06-0749-10A-01D-1492-08
GBM	TCGA-06-0750	TCGA-06-0750-01A-01D-1492-08	TCGA-06-0750-10A-01D-1492-08
GBM	TCGA-06-0875	TCGA-06-0875-01A-01D-1492-08	TCGA-06-0875-10A-01D-1492-08
GBM	TCGA-06-0876	TCGA-06-0876-01A-01D-1492-08	TCGA-06-0876-10A-01D-1492-08
GBM	TCGA-06-0877	TCGA-06-0877-01A-01D-1492-08	TCGA-06-0877-10A-01D-1492-08
GBM	TCGA-06-0878	TCGA-06-0878-01A-01D-1492-08	TCGA-06-0878-10A-01D-1492-08
GBM	TCGA-06-0879	TCGA-06-0879-01A-01D-1492-08	TCGA-06-0879-10A-01D-1492-08
GBM	TCGA-06-0881	TCGA-06-0881-01A-02D-1492-08	TCGA-06-0881-10A-01D-1492-08
GBM	TCGA-06-0882	TCGA-06-0882-01A-01D-1492-08	TCGA-06-0882-10A-01D-1492-08
GBM	TCGA-06-0939	TCGA-06-0939-01A-01D-1353-08	TCGA-06-0939-10A-01D-1353-08
GBM	TCGA-06-1084	TCGA-06-1084-01A-01W-0611-08	TCGA-06-1084-10A-01W-0611-08
GBM	TCGA-06-1087	TCGA-06-1087-01A-02W-0611-08	TCGA-06-1087-10A-01W-0611-08
GBM	TCGA-06-1800	TCGA-06-1800-01A-01W-0643-08	TCGA-06-1800-10A-01W-0643-08
GBM	TCGA-06-1801	TCGA-06-1801-01A-02W-0643-08	TCGA-06-1801-10A-01W-0643-08
GBM	TCGA-06-1802	TCGA-06-1802-01A-01W-0643-08	TCGA-06-1802-10A-01W-0643-08
GBM	TCGA-06-1804	TCGA-06-1804-01A-01D-1696-08	TCGA-06-1804-10A-01D-1696-08
GBM	TCGA-06-1805	TCGA-06-1805-01A-01W-0643-08	TCGA-06-1805-10A-01W-0644-08
GBM	TCGA-06-2557	TCGA-06-2557-01A-01D-1494-08	TCGA-06-2557-10A-01D-1494-08
GBM	TCGA-06-2558	TCGA-06-2558-01A-01D-1494-08	TCGA-06-2558-10A-01D-1494-08
GBM	TCGA-06-2559	TCGA-06-2559-01A-01D-1494-08	TCGA-06-2559-10A-01D-1494-08
GBM	TCGA-06-2561	TCGA-06-2561-01A-02D-1494-08	TCGA-06-2561-10A-01D-1494-08
GBM	TCGA-06-2562	TCGA-06-2562-01A-01D-1494-08	TCGA-06-2562-10A-01D-1494-08
GBM	TCGA-06-2563	TCGA-06-2563-01A-01D-1494-08	TCGA-06-2563-10A-01D-1494-08
GBM	TCGA-06-2564	TCGA-06-2564-01A-01D-1494-08	TCGA-06-2564-10A-01D-1494-08
GBM	TCGA-06-2565	TCGA-06-2565-01A-01D-1494-08	TCGA-06-2565-10A-01D-1494-08
GBM	TCGA-06-2566	TCGA-06-2566-01A-01W-0837-08	TCGA-06-2566-10A-01W-0837-08
GBM	TCGA-06-2567	TCGA-06-2567-01A-01D-1494-08	TCGA-06-2567-10A-01D-1494-08
GBM	TCGA-06-2569	TCGA-06-2569-01A-01D-1494-08	TCGA-06-2569-10A-01D-1494-08
GBM	TCGA-06-2570	TCGA-06-2570-01A-01D-1495-08	TCGA-06-2570-10A-01D-1495-08
GBM	TCGA-06-5408	TCGA-06-5408-01A-01D-1696-08	TCGA-06-5408-10A-01D-1696-08
GBM	TCGA-06-5410	TCGA-06-5410-01A-01D-1696-08	TCGA-06-5410-10A-01D-1696-08
GBM	TCGA-06-5411	TCGA-06-5411-01A-01D-1696-08	TCGA-06-5411-10A-01D-1696-08
GBM	TCGA-06-5412	TCGA-06-5412-01A-01D-1696-08	TCGA-06-5412-10A-01D-1696-08
GBM	TCGA-06-5413	TCGA-06-5413-01A-01D-1696-08	TCGA-06-5413-10A-01D-1696-08
GBM	TCGA-06-5414	TCGA-06-5414-01A-01D-1486-08	TCGA-06-5414-10A-01D-1486-08
GBM	TCGA-06-5415	TCGA-06-5415-01A-01D-1486-08	TCGA-06-5415-10A-01D-1486-08
GBM	TCGA-06-5417	TCGA-06-5417-01A-01D-1486-08	TCGA-06-5417-10A-01D-1486-08
GBM	TCGA-06-5418	TCGA-06-5418-01A-01D-1486-08	TCGA-06-5418-10A-01D-1486-08
GBM	TCGA-06-5856	TCGA-06-5856-01A-01D-1696-08	TCGA-06-5856-10A-01D-1696-08
GBM	TCGA-06-5858	TCGA-06-5858-01A-01D-1696-08	TCGA-06-5858-10A-01D-1696-08
GBM	TCGA-06-5859	TCGA-06-5859-01A-01D-1696-08	TCGA-06-5859-10A-01D-1696-08
GBM	TCGA-06-6389	TCGA-06-6389-01A-11D-1696-08	TCGA-06-6389-10A-01D-1696-08
GBM	TCGA-06-6390	TCGA-06-6390-01A-11D-1696-08	TCGA-06-6390-10A-01D-1696-08
GBM	TCGA-06-6693	TCGA-06-6693-01A-11D-1845-08	TCGA-06-6693-10A-01D-1845-08
GBM	TCGA-06-6694	TCGA-06-6694-01A-12D-1845-08	TCGA-06-6694-10A-01D-1845-08
GBM	TCGA-06-6695	TCGA-06-6695-01A-11D-1845-08	TCGA-06-6695-10A-01D-1845-08
GBM	TCGA-06-6697	TCGA-06-6697-01A-11D-1845-08	TCGA-06-6697-10A-01D-1845-08
GBM	TCGA-06-6698	TCGA-06-6698-01A-11D-1845-08	TCGA-06-6698-10A-01D-1845-08
GBM	TCGA-06-6699	TCGA-06-6699-01A-11D-1845-08	TCGA-06-6699-10A-01D-1845-08
GBM	TCGA-06-6700	TCGA-06-6700-01A-12D-1845-08	TCGA-06-6700-10A-01D-1845-08
GBM	TCGA-06-6701	TCGA-06-6701-01A-11D-1845-08	TCGA-06-6701-10A-01D-1845-08
GBM	TCGA-06-A5U0	TCGA-06-A5U0-01A-11D-A33T-08	TCGA-06-A5U0-10A-01D-A33W-08
GBM	TCGA-06-A5U1	TCGA-06-A5U1-01A-11D-A33T-08	TCGA-06-A5U1-10A-01D-A33W-08
GBM	TCGA-06-A6S0	TCGA-06-A6S0-01A-11D-A33T-08	TCGA-06-A6S0-10A-01D-A33W-08
GBM	TCGA-06-A6S1	TCGA-06-A6S1-01A-11D-A33T-08	TCGA-06-A6S1-10A-01D-A33W-08
GBM	TCGA-06-A7TK	TCGA-06-A7TK-01A-21D-A391-08	TCGA-06-A7TK-10A-01D-A394-08
GBM	TCGA-06-A7TL	TCGA-06-A7TL-01A-11D-A391-08	TCGA-06-A7TL-10A-01D-A394-08
GBM	TCGA-08-0386	TCGA-08-0386-01A-01D-1492-08	TCGA-08-0386-11A-01D-1492-08
GBM	TCGA-12-0615	TCGA-12-0615-01A-01D-1492-08	TCGA-12-0615-10A-01D-1492-08
GBM	TCGA-12-0616	TCGA-12-0616-01A-01D-1492-08	TCGA-12-0616-10A-01D-1492-08
GBM	TCGA-12-0618	TCGA-12-0618-01A-01D-1492-08	TCGA-12-0618-10A-01D-1492-08
GBM	TCGA-12-0619	TCGA-12-0619-01A-01D-1492-08	TCGA-12-0619-10A-01D-1492-08
GBM	TCGA-12-0656	TCGA-12-0656-01A-03W-0348-08	TCGA-12-0656-10A-01W-0348-08
GBM	TCGA-12-0657	TCGA-12-0657-01A-01W-0348-08	TCGA-12-0657-10A-01W-0348-08
GBM	TCGA-12-0662	TCGA-12-0662-01A-01W-0348-08	TCGA-12-0662-10A-01W-0348-08
GBM	TCGA-12-0670	TCGA-12-0670-01B-01W-0424-08	TCGA-12-0670-10B-01W-0424-08
GBM	TCGA-12-0688	TCGA-12-0688-01A-02D-1492-08	TCGA-12-0688-10A-01D-1492-08
GBM	TCGA-12-0691	TCGA-12-0691-01A-01W-0348-08	TCGA-12-0691-10A-01W-0348-08
GBM	TCGA-12-0692	TCGA-12-0692-01A-01D-1492-08	TCGA-12-0692-10A-01D-1492-08
GBM	TCGA-12-0707	TCGA-12-0707-01A-01W-0348-08	TCGA-12-0707-10A-01W-0348-08
GBM	TCGA-12-0773	TCGA-12-0773-01A-01W-0348-08	TCGA-12-0773-10A-01W-0348-08
GBM	TCGA-12-0775	TCGA-12-0775-01A-01W-0348-08	TCGA-12-0775-10A-01W-0348-08
GBM	TCGA-12-0778	TCGA-12-0778-01A-01W-0348-08	TCGA-12-0778-10A-01W-0348-08
GBM	TCGA-12-0818	TCGA-12-0818-01A-01W-0424-08	TCGA-12-0818-10A-01W-0424-08
GBM	TCGA-12-0819	TCGA-12-0819-01A-01W-0424-08	TCGA-12-0819-10A-01W-0424-08
GBM	TCGA-12-0820	TCGA-12-0820-01A-01W-0424-08	TCGA-12-0820-10A-01W-0424-08
GBM	TCGA-12-0821	TCGA-12-0821-01A-01D-1492-08	TCGA-12-0821-10A-01D-1492-08
GBM	TCGA-12-0822	TCGA-12-0822-01A-01W-0424-08	TCGA-12-0822-10A-01W-0424-08
GBM	TCGA-12-0826	TCGA-12-0826-01A-01W-0424-08	TCGA-12-0826-10A-01W-0424-08
GBM	TCGA-12-0827	TCGA-12-0827-01A-01W-0424-08	TCGA-12-0827-10A-01W-0424-08
GBM	TCGA-12-0828	TCGA-12-0828-01A-01W-0424-08	TCGA-12-0828-10A-01W-0424-08
GBM	TCGA-12-0829	TCGA-12-0829-01A-01W-0424-08	TCGA-12-0829-10A-01W-0424-08
GBM	TCGA-12-1088	TCGA-12-1088-01A-01W-0611-08	TCGA-12-1088-10C-01W-0611-08
GBM	TCGA-12-1089	TCGA-12-1089-01A-01W-0611-08	TCGA-12-1089-10C-01W-0611-08
GBM	TCGA-12-1092	TCGA-12-1092-01B-01W-0611-08	TCGA-12-1092-10A-01W-0611-08
GBM	TCGA-12-1093	TCGA-12-1093-01A-01W-0611-08	TCGA-12-1093-10A-01W-0611-08
GBM	TCGA-12-1597	TCGA-12-1597-01B-01D-1495-08	TCGA-12-1597-10A-01D-1495-08
GBM	TCGA-12-1598	TCGA-12-1598-01A-01W-0643-08	TCGA-12-1598-10A-01W-0643-08
GBM	TCGA-12-1599	TCGA-12-1599-01A-01W-0643-08	TCGA-12-1599-10A-01W-0643-08
GBM	TCGA-12-1600	TCGA-12-1600-01A-01W-0643-08	TCGA-12-1600-10A-01W-0643-08
GBM	TCGA-12-1602	TCGA-12-1602-01A-01W-0643-08	TCGA-12-1602-10A-01W-0643-08
GBM	TCGA-12-3644	TCGA-12-3644-01A-01W-0922-08	TCGA-12-3644-10A-01W-0922-08
GBM	TCGA-12-3646	TCGA-12-3646-01A-01W-0922-08	TCGA-12-3646-10A-01W-0922-08
GBM	TCGA-12-3648	TCGA-12-3648-01A-01W-0922-08	TCGA-12-3648-10A-01W-0922-08
GBM	TCGA-12-3649	TCGA-12-3649-01A-01D-1495-08	TCGA-12-3649-10A-01D-1495-08
GBM	TCGA-12-3650	TCGA-12-3650-01A-01D-1495-08	TCGA-12-3650-10A-01D-1495-08
GBM	TCGA-12-3651	TCGA-12-3651-01A-01W-0922-08	TCGA-12-3651-10A-01W-0922-08
GBM	TCGA-12-3652	TCGA-12-3652-01A-01D-1495-08	TCGA-12-3652-10A-01D-1495-08
GBM	TCGA-12-3653	TCGA-12-3653-01A-01D-1495-08	TCGA-12-3653-10A-01D-1495-08
GBM	TCGA-12-5295	TCGA-12-5295-01A-01D-1486-08	TCGA-12-5295-10A-01D-1486-08
GBM	TCGA-12-5299	TCGA-12-5299-01A-02D-1486-08	TCGA-12-5299-10A-01D-1486-08
GBM	TCGA-12-5301	TCGA-12-5301-01A-01D-1486-08	TCGA-12-5301-10A-01D-1486-08
GBM	TCGA-14-0736	TCGA-14-0736-01A-01D-2280-08	TCGA-14-0736-10C-01D-2280-08
GBM	TCGA-14-0740	TCGA-14-0740-01B-01D-1845-08	TCGA-14-0740-10B-01D-1845-08
GBM	TCGA-14-0781	TCGA-14-0781-01B-01D-1696-08	TCGA-14-0781-10A-01D-1696-08
GBM	TCGA-14-0786	TCGA-14-0786-01B-01D-1492-08	TCGA-14-0786-10A-01D-1492-08
GBM	TCGA-14-0787	TCGA-14-0787-01A-01D-1492-08	TCGA-14-0787-10A-01D-1492-08
GBM	TCGA-14-0789	TCGA-14-0789-01A-01D-1492-08	TCGA-14-0789-10A-01D-1492-08
GBM	TCGA-14-0790	TCGA-14-0790-01B-01D-1494-08	TCGA-14-0790-10A-01D-1494-08
GBM	TCGA-14-0812	TCGA-14-0812-01B-01W-0643-08	TCGA-14-0812-10A-01W-0643-08
GBM	TCGA-14-0813	TCGA-14-0813-01A-01D-1492-08	TCGA-14-0813-10A-01D-1492-08
GBM	TCGA-14-0817	TCGA-14-0817-01A-01D-1492-08	TCGA-14-0817-10A-01D-1492-08
GBM	TCGA-14-0862	TCGA-14-0862-01B-01D-1845-08	TCGA-14-0862-10C-01D-1845-08
GBM	TCGA-14-0865	TCGA-14-0865-01B-01W-0643-08	TCGA-14-0865-10A-01W-0643-08
GBM	TCGA-14-0866	TCGA-14-0866-01B-01W-0643-08	TCGA-14-0866-10A-01W-0643-08
GBM	TCGA-14-0867	TCGA-14-0867-01A-01W-0424-08	TCGA-14-0867-10A-01W-0424-08
GBM	TCGA-14-0871	TCGA-14-0871-01A-01D-1492-08	TCGA-14-0871-10A-01D-1492-08
GBM	TCGA-14-1034	TCGA-14-1034-01A-01D-1492-08	TCGA-14-1034-10A-01D-1492-08
GBM	TCGA-14-1037	TCGA-14-1037-01A-01W-0643-08	TCGA-14-1037-10B-01W-0644-08
GBM	TCGA-14-1043	TCGA-14-1043-01B-11D-1845-08	TCGA-14-1043-10A-01D-1845-08
GBM	TCGA-14-1396	TCGA-14-1396-01A-01W-0611-08	TCGA-14-1396-10A-01W-0611-08
GBM	TCGA-14-1450	TCGA-14-1450-01B-01D-1845-08	TCGA-14-1450-10B-01D-1845-08
GBM	TCGA-14-1451	TCGA-14-1451-01A-01W-0611-08	TCGA-14-1451-10A-01W-0612-08
GBM	TCGA-14-1453	TCGA-14-1453-01A-01W-0611-08	TCGA-14-1453-10A-01W-0612-08
GBM	TCGA-14-1455	TCGA-14-1455-01A-01W-0643-08	TCGA-14-1455-10A-01W-0643-08
GBM	TCGA-14-1456	TCGA-14-1456-01B-01D-1494-08	TCGA-14-1456-10A-01D-1494-08
GBM	TCGA-14-1458	TCGA-14-1458-01A-01W-0643-08	TCGA-14-1458-10A-01W-0643-08
GBM	TCGA-14-1794	TCGA-14-1794-01A-01W-0643-08	TCGA-14-1794-10A-01W-0643-08
GBM	TCGA-14-1795	TCGA-14-1795-01A-01W-0643-08	TCGA-14-1795-10A-01W-0643-08
GBM	TCGA-14-1821	TCGA-14-1821-01A-01W-0643-08	TCGA-14-1821-10A-01W-0644-08
GBM	TCGA-14-1823	TCGA-14-1823-01A-01D-1494-08	TCGA-14-1823-10A-01D-1494-08
GBM	TCGA-14-1825	TCGA-14-1825-01A-01D-1494-08	TCGA-14-1825-10A-01D-1494-08
GBM	TCGA-14-1827	TCGA-14-1827-01A-01W-0643-08	TCGA-14-1827-10A-01W-0644-08
GBM	TCGA-14-1829	TCGA-14-1829-01A-01D-1494-08	TCGA-14-1829-10A-01D-1494-08
GBM	TCGA-14-2554	TCGA-14-2554-01A-01D-1494-08	TCGA-14-2554-10A-01D-1494-08
GBM	TCGA-14-3476	TCGA-14-3476-01B-01D-1353-08	TCGA-14-3476-10A-01D-1353-08
GBM	TCGA-14-3477	TCGA-14-3477-01A-01W-0922-08	TCGA-14-3477-10A-01W-0922-08
GBM	TCGA-15-0742	TCGA-15-0742-01A-01D-1492-08	TCGA-15-0742-10A-01D-1492-08
GBM	TCGA-15-1446	TCGA-15-1446-01A-01W-0611-08	TCGA-15-1446-10A-01W-0612-08
GBM	TCGA-16-0846	TCGA-16-0846-01A-01D-1492-08	TCGA-16-0846-10A-01D-1492-08
GBM	TCGA-16-0848	TCGA-16-0848-01A-01D-1492-08	TCGA-16-0848-10A-01D-1492-08
GBM	TCGA-16-0849	TCGA-16-0849-01A-01W-0424-08	TCGA-16-0849-10A-01W-0424-08
GBM	TCGA-16-0850	TCGA-16-0850-01A-01W-0424-08	TCGA-16-0850-10A-01W-0424-08
GBM	TCGA-16-0861	TCGA-16-0861-01A-01D-1492-08	TCGA-16-0861-10A-01D-1492-08
GBM	TCGA-16-1045	TCGA-16-1045-01B-01D-1492-08	TCGA-16-1045-10B-01D-1492-08
GBM		TCGA-16-1048-01B-01D-1353-08	TCGA-16-1048-10A-01D-1353-08
GBM	TCGA-16-1060	TCGA-16-1460-01A-01W-0643-08	TCGA-16-1460-10A-01W-0643-08
GBM	TCGA-19-0957	TCGA-19-0957-01C-01W-0643-08	TCGA-19-0957-10A-01W-0643-08
GBM	TCGA-19-1385	TCGA-19-1385-01A-02W-0643-08	TCGA-19-1385-10C-01W-0643-08
GBM	TCGA-19-1386	TCGA-19-1386-01A-01W-0643-08	TCGA-19-1386-10C-01W-0643-08
GBM	TCGA-19-1387	TCGA-19-1387-01A-01W-0643-08	TCGA-19-1387-10C-01W-0643-08
GBM	TCGA-19-1388	TCGA-19-1388-01A-01W-0643-08	TCGA-19-1388-10C-01W-0643-08
GBM	TCGA-19-1389	TCGA-19-1389-01A-01W-0643-08	TCGA-19-1389-10C-01W-0643-08
GBM	TCGA-19-1390	TCGA-19-1390-01A-01D-1495-08	TCGA-19-1390-10C-01D-1495-08
GBM	TCGA-19-1786	TCGA-19-1786-01A-01W-0643-08	TCGA-19-1786-10A-01W-0643-08
GBM	TCGA-19-1787	TCGA-19-1787-01B-01D-1495-08	TCGA-19-1787-10A-01D-1495-08
GBM	TCGA-19-1788	TCGA-19-1788-01A-01W-0643-08	TCGA-19-1788-10A-01W-0643-08
GBM	TCGA-19-1789	TCGA-19-1789-01A-01W-0643-08	TCGA-19-1789-10A-01W-0643-08
GBM	TCGA-19-1790	TCGA-19-1790-01B-01D-1353-08	TCGA-19-1790-10B-01D-1353-08
GBM	TCGA-19-1791	TCGA-19-1791-01A-01W-0643-08	TCGA-19-1791-10A-01W-0643-08
GBM	TCGA-19-2619	TCGA-19-2619-01A-01D-1495-08	TCGA-19-2619-10A-01D-1495-08
GBM	TCGA-19-2620	TCGA-19-2620-01A-01D-1495-08	TCGA-19-2620-10A-01D-1495-08
GBM	TCGA-19-2621	TCGA-19-2621-01B-01W-0922-08	TCGA-19-2621-10A-01W-0922-08
GBM	TCGA-19-2623	TCGA-19-2623-01A-01D-1495-08	TCGA-19-2623-10A-01D-1495-08
GBM	TCGA-19-2624	TCGA-19-2624-01A-01D-1495-08	TCGA-19-2624-10A-01D-1495-08
GBM	TCGA-19-2625	TCGA-19-2625-01A-01D-1495-08	TCGA-19-2625-10A-01D-1495-08
GBM	TCGA-19-2629	TCGA-19-2629-01A-01D-1495-08	TCGA-19-2629-10A-01D-1495-08
GBM	TCGA-19-2631	TCGA-19-2631-01A-01D-1353-08	TCGA-19-2631-10B-01D-1353-08
GBM	TCGA-19-4065	TCGA-19-4065-01A-01D-2280-08	TCGA-19-4065-10A-01D-2280-08
GBM	TCGA-19-4068	TCGA-19-4068-01A-01D-1353-08	TCGA-19-4068-10A-01D-1353-08
GBM	TCGA-19-5947	TCGA-19-5947-01A-11D-1696-08	TCGA-19-5947-10A-01D-1696-08
GBM	TCGA-19-5950	TCGA-19-5950-01A-11D-1696-08	TCGA-19-5950-10A-01D-1696-08
GBM	TCGA-19-5951	TCGA-19-5951-01A-11D-1696-08	TCGA-19-5951-10A-01D-1696-08
GBM	TCGA-19-5952	TCGA-19-5952-01A-11D-1696-08	TCGA-19-5952-10A-01D-1696-08
GBM	TCGA-19-5953	TCGA-19-5953-01B-12D-1845-08	TCGA-19-5953-10A-01D-1845-08
GBM	TCGA-19-5954	TCGA-19-5954-01A-11D-1696-08	TCGA-19-5954-10A-01D-1696-08
GBM	TCGA-19-5955	TCGA-19-5955-01A-11D-1696-08	TCGA-19-5955-10A-01D-1696-08
GBM	TCGA-19-5958	TCGA-19-5958-01A-11D-1696-08	TCGA-19-5958-10A-01D-1696-08
GBM	TCGA-19-5959	TCGA-19-5959-01A-11D-1696-08	TCGA-19-5959-10A-01D-1696-08
GBM	TCGA-19-5960	TCGA-19-5960-01A-11D-1696-08	TCGA-19-5960-10A-01D-1696-08
GBM	TCGA-19-A60I	TCGA-19-A60I-01A-12D-A33T-08	TCGA-19-A60I-10A-01D-A33W-08
GBM	TCGA-19-A6J4	TCGA-19-A6J4-01A-11D-A33T-08	TCGA-19-A6J4-10A-01D-A33W-08
GBM	TCGA-19-A6J5	TCGA-19-A6J5-01A-21D-A33T-08	TCGA-19-A6J5-10A-01D-A33W-08
GBM	TCGA-26-1439	TCGA-26-1439-01A-01D-1353-08	TCGA-26-1439-10A-01D-1353-08
GBM	TCGA-26-1442	TCGA-26-1442-01A-01D-1696-08	TCGA-26-1442-10A-01D-1696-08
GBM	TCGA-26-1799	TCGA-26-1799-01A-02W-0643-08	TCGA-26-1799-10A-01W-0643-08
GBM	TCGA-26-5132	TCGA-26-5132-01A-01D-1486-08	TCGA-26-5132-10A-01D-1486-08
GBM	TCGA-26-5133	TCGA-26-5133-01A-01D-1486-08	TCGA-26-5133-10A-01D-1486-08
GBM	TCGA-26-5134	TCGA-26-5134-01A-01D-1486-08	TCGA-26-5134-10A-01D-1486-08
GBM	TCGA-26-5135	TCGA-26-5135-01A-01D-1486-08	TCGA-26-5135-10A-01D-1486-08
GBM	TCGA-26-5136	TCGA-26-5136-01B-01D-1486-08	TCGA-26-5136-10A-01D-1486-08
GBM	TCGA-26-5139	TCGA-26-5139-01A-01D-1486-08	TCGA-26-5139-10A-01D-1486-08
GBM	TCGA-26-6173	TCGA-26-6173-01A-11D-1845-08	TCGA-26-6173-10A-01D-1845-08
GBM	TCGA-26-6174	TCGA-26-6174-01A-21D-1845-08	TCGA-26-6174-10A-01D-1845-08
GBM	TCGA-26-A7UX	TCGA-26-A7UX-01B-11D-A391-08	TCGA-26-A7UX-10A-01D-A394-08
GBM	TCGA-27-1830	TCGA-27-1830-01A-01D-1494-08	TCGA-27-1830-10A-01D-1494-08
GBM	TCGA-27-1831	TCGA-27-1831-01A-01D-1494-08	TCGA-27-1831-10A-01D-1494-08
GBM	TCGA-27-1832	TCGA-27-1832-01A-01D-1494-08	TCGA-27-1832-10A-01D-1494-08
GBM	TCGA-27-1833	TCGA-27-1833-01A-01D-1494-08	TCGA-27-1833-10A-01D-1494-08
GBM	TCGA-27-1834	TCGA-27-1834-01A-01D-1494-08	TCGA-27-1834-10A-01D-1494-08
GBM	TCGA-27-1835	TCGA-27-1835-01A-01D-1494-08	TCGA-27-1835-10A-01D-1494-08
GBM	TCGA-27-1836	TCGA-27-1836-01A-01D-1494-08	TCGA-27-1836-10A-01D-1494-08
GBM	TCGA-27-1837	TCGA-27-1837-01A-01D-1494-08	TCGA-27-1837-10A-01D-1494-08
GBM	TCGA-27-1838	TCGA-27-1838-01A-01D-1494-08	TCGA-27-1838-10A-01D-1494-08
GBM	TCGA-27-2518	TCGA-27-2518-01A-01D-1494-08	TCGA-27-2518-10A-01D-1494-08
GBM	TCGA-27-2519	TCGA-27-2519-01A-01D-1494-08	TCGA-27-2519-10A-01D-1494-08
GBM	TCGA-27-2521	TCGA-27-2521-01A-01D-1494-08	TCGA-27-2521-10A-01D-1494-08
GBM	TCGA-27-2523	TCGA-27-2523-01A-01D-1494-08	TCGA-27-2523-10A-01D-1494-08
GBM	TCGA-27-2524	TCGA-27-2524-01A-01D-1494-08	TCGA-27-2524-10A-01D-1494-08
GBM	TCGA-27-2526	TCGA-27-2526-01A-01D-1494-08	TCGA-27-2526-10A-01D-1494-08
GBM	TCGA-27-2527	TCGA-27-2527-01A-01D-1494-08	TCGA-27-2527-10A-01D-1494-08
GBM	TCGA-27-2528	TCGA-27-2528-01A-01D-1494-08	TCGA-27-2528-10A-01D-1494-08
GBM	TCGA-28-1745	TCGA-28-1745-01B-01W-0643-08	TCGA-28-1745-10A-01W-0643-08
GBM	TCGA-28-1746	TCGA-28-1746-01A-01W-0643-08	TCGA-28-1746-10A-01W-0643-08
GBM	TCGA-28-1749	TCGA-28-1749-01A-01W-0643-08	TCGA-28-1749-10A-01W-0643-08
GBM	TCGA-28-1750	TCGA-28-1750-01A-01W-0643-08	TCGA-28-1750-10A-01W-0643-08
GBM	TCGA-28-1751	TCGA-28-1751-01A-02W-0643-08	TCGA-28-1751-10A-01W-0643-08
GBM	TCGA-28-1752	TCGA-28-1752-01A-01W-0643-08	TCGA-28-1752-10A-01W-0643-08
GBM	TCGA-28-1753	TCGA-28-1753-01A-01D-1494-08	TCGA-28-1753-10B-01D-1494-08
GBM	TCGA-28-1755	TCGA-28-1755-01A-01W-0643-08	TCGA-28-1755-10A-01W-0643-08
GBM	TCGA-28-1757	TCGA-28-1757-01A-02W-0643-08	TCGA-28-1757-10A-01W-0643-08
GBM	TCGA-28-1760	TCGA-28-1760-01A-01W-0643-08	TCGA-28-1760-10A-01W-0643-08
GBM	TCGA-28-2499	TCGA-28-2499-01A-01D-1494-08	TCGA-28-2499-10A-01D-1494-08
GBM		TCGA-28-2501-01A-01D-1696-08	TCGA-28-2501-10A-01D-1696-08
GBM	TCGA-28-2502	TCGA-28-2502-01B-01D-1494-08	TCGA-28-2502-10A-01D-1494-08
GBM	TCGA-28-2506	TCGA-28-2506-01A-02W-0837-08	TCGA-28-2506-10A-01W-0838-08
GBM	TCGA-28-2509	TCGA-28-2509-01A-01D-1494-08	TCGA-28-2509-10A-01D-1494-08
GBM		TCGA-28-2510-01A-01D-1696-08	TCGA-28-2510-10A-01D-1696-08
GBM	TCGA-28-2513	TCGA-28-2513-01A-01D-1494-08	TCGA-28-2513-10A-01D-1494-08
GBM	TCGA-28-2514	TCGA-28-2514-01A-02D-1494-08	TCGA-28-2514-10A-01D-1494-08
GBM	TCGA-28-5204	TCGA-28-5204-01A-01D-1486-08	TCGA-28-5204-10A-01D-1486-08
GBM	TCGA-28-5207	TCGA-28-5207-01A-01D-1486-08	TCGA-28-5207-10A-01D-1486-08
GBM	TCGA-28-5208	TCGA-28-5208-01A-01D-1486-08	TCGA-28-5208-10A-01D-1486-08
GBM	TCGA-28-5209	TCGA-28-5209-01A-01D-1486-08	TCGA-28-5209-10A-01D-1486-08
GBM	TCGA-28-5211	TCGA-28-5211-01C-11D-1845-08	TCGA-28-5211-10B-01D-1845-08
GBM	TCGA-28-5213	TCGA-28-5213-01A-01D-1486-08	TCGA-28-5213-10A-01D-1486-08
GBM	TCGA-28-5214	TCGA-28-5214-01A-01D-1486-08	TCGA-28-5214-10A-01D-1486-08
GBM	TCGA-28-5215	TCGA-28-5215-01A-01D-1486-08	TCGA-28-5215-10A-01D-1486-08
GBM	TCGA-28-5216	TCGA-28-5216-01A-01D-1486-08	TCGA-28-5216-10A-01D-1486-08
GBM	TCGA-28-5218	TCGA-28-5218-01A-01D-1486-08	TCGA-28-5218-10A-01D-1486-08
GBM	TCGA-28-5219	TCGA-28-5219-01A-01D-1486-08	TCGA-28-5219-10A-01D-1486-08
GBM	TCGA-28-5220	TCGA-28-5220-01A-01D-1486-08	TCGA-28-5220-10A-01D-1486-08
GBM	TCGA-28-6450	TCGA-28-6450-01A-11D-1696-08	TCGA-28-6450-10A-01D-1696-08
GBM	TCGA-32-1970	TCGA-32-1970-01A-01D-1494-08	TCGA-32-1970-10A-01D-1494-08
GBM	TCGA-32-1976	TCGA-32-1976-01A-01W-0837-08	TCGA-32-1976-10A-01W-0838-08
GBM	TCGA-32-1977	TCGA-32-1977-01A-01D-1353-08	TCGA-32-1977-10C-01D-1353-08
GBM	TCGA-32-1979	TCGA-32-1979-01A-01D-1696-08	TCGA-32-1979-10A-01D-1696-08
GBM	TCGA-32-1980	TCGA-32-1980-01A-01D-1696-08	TCGA-32-1980-10A-01D-1696-08
GBM	TCGA-32-1986	TCGA-32-1986-01A-01D-1494-08	TCGA-32-1986-10A-01D-1494-08
GBM	TCGA-32-1991	TCGA-32-1991-01A-01D-1353-08	TCGA-32-1991-10C-01D-1353-08
GBM	TCGA-32-2494	TCGA-32-2494-01A-01D-1353-08	TCGA-32-2494-10A-01D-1353-08
GBM	TCGA-32-2495	TCGA-32-2495-01A-01D-1353-08	TCGA-32-2495-10B-01D-1353-08
GBM	TCGA-32-2615	TCGA-32-2615-01A-01D-1495-08	TCGA-32-2615-10A-01D-1495-08
GBM	TCGA-32-2616	TCGA-32-2616-01A-01D-1495-08	TCGA-32-2616-10A-01D-1495-08
GBM	TCGA-32-2632	TCGA-32-2632-01A-01D-1495-08	TCGA-32-2632-10A-01D-1495-08
GBM	TCGA-32-2634	TCGA-32-2634-01A-01D-1495-08	TCGA-32-2634-10A-01D-1495-08
GBM	TCGA-32-2638	TCGA-32-2638-01A-01D-1495-08	TCGA-32-2638-10A-01D-1495-08
GBM	TCGA-32-4208	TCGA-32-4208-01A-01D-1353-08	TCGA-32-4208-10A-01D-1353-08
GBM	TCGA-32-4209	TCGA-32-4209-01A-01D-1353-08	TCGA-32-4209-10A-01D-1353-08
GBM	TCGA-32-4210	TCGA-32-4210-01A-01D-1353-08	TCGA-32-4210-10A-01D-1353-08
GBM	TCGA-32-4211	TCGA-32-4211-01A-01D-1353-08	TCGA-32-4211-10A-01D-1353-08
GBM	TCGA-32-4213	TCGA-32-4213-01A-01D-1353-08	TCGA-32-4213-10A-01D-1353-08
GBM	TCGA-32-4719	TCGA-32-4719-01A-01D-1353-08	TCGA-32-4719-10A-01D-1353-08
GBM	TCGA-32-5222	TCGA-32-5222-01A-01D-1486-08	TCGA-32-5222-10A-01D-1486-08
GBM	TCGA-41-2571	TCGA-41-2571-01A-01D-1495-08	TCGA-41-2571-10A-01D-1495-08
GBM	TCGA-41-2572	TCGA-41-2572-01A-01D-1353-08	TCGA-41-2572-10A-01D-1353-08
GBM	TCGA-41-2573	TCGA-41-2573-01A-01D-1495-08	TCGA-41-2573-10A-01D-1495-08
GBM	TCGA-41-2575	TCGA-41-2575-01A-01D-1495-08	TCGA-41-2575-10A-01D-1495-08
GBM	TCGA-41-3392	TCGA-41-3392-01A-01D-1495-08	TCGA-41-3392-10A-01D-1495-08
GBM	TCGA-41-3393	TCGA-41-3393-01A-01D-1353-08	TCGA-41-3393-10A-01D-1353-08
GBM	TCGA-41-3915	TCGA-41-3915-01A-01D-1353-08	TCGA-41-3915-10A-01D-1353-08
GBM	TCGA-41-4097	TCGA-41-4097-01A-01D-1353-08	TCGA-41-4097-10A-01D-1353-08
GBM	TCGA-41-5651	TCGA-41-5651-01A-01D-1696-08	TCGA-41-5651-10A-01D-1696-08
GBM	TCGA-41-6646	TCGA-41-6646-01A-11D-1845-08	TCGA-41-6646-10A-01D-1845-08
GBM	TCGA-4W-AA9R	TCGA-4W-AA9R-01A-11D-A391-08	TCGA-4W-AA9R-10A-01D-A394-08
GBM	TCGA-4W-AA9S	TCGA-4W-AA9S-01A-11D-A391-08	TCGA-4W-AA9S-10A-01D-A394-08
GBM	TCGA-4W-AA9T	TCGA-4W-AA9T-01A-11D-A391-08	TCGA-4W-AA9T-10A-01D-A394-08
GBM	TCGA-74-6573	TCGA-74-6573-01A-12D-1845-08	TCGA-74-6573-11A-02D-1845-08
GBM	TCGA-74-6575	TCGA-74-6575-01A-11D-1845-08	TCGA-74-6575-10A-01D-1845-08
GBM	TCGA-74-6577	TCGA-74-6577-01A-11D-1845-08	TCGA-74-6577-10A-01D-1845-08
GBM	TCGA-74-6578	TCGA-74-6578-01A-11D-1845-08	TCGA-74-6578-10A-01D-1845-08
GBM	TCGA-74-6581	TCGA-74-6581-01A-11D-1845-08	TCGA-74-6581-10A-01D-1845-08
GBM	TCGA-74-6584	TCGA-74-6584-01A-11D-1845-08	TCGA-74-6584-10A-01D-1845-08
GBM	TCGA-76-4925	TCGA-76-4925-01A-01D-1486-08	TCGA-76-4925-10A-01D-1486-08
GBM	TCGA-76-4926	TCGA-76-4926-01B-01D-1486-08	TCGA-76-4926-10A-01D-1486-08
GBM	TCGA-76-4927	TCGA-76-4927-01A-01D-1486-08	TCGA-76-4927-10A-01D-1486-08
GBM	TCGA-76-4928	TCGA-76-4928-01B-01D-1486-08	TCGA-76-4928-10A-01D-1486-08
GBM	TCGA-76-4929	TCGA-76-4929-01A-01D-1486-08	TCGA-76-4929-10A-01D-1486-08
GBM	TCGA-76-4931	TCGA-76-4931-01A-01D-1486-08	TCGA-76-4931-10A-01D-1486-08
GBM	TCGA-76-4932	TCGA-76-4932-01A-01D-1486-08	TCGA-76-4932-10A-01D-1486-08
GBM	TCGA-76-4934	TCGA-76-4934-01A-01D-1486-08	TCGA-76-4934-10A-01D-1486-08
GBM	TCGA-76-4935	TCGA-76-4935-01A-01D-1486-08	TCGA-76-4935-10A-01D-1486-08
GBM	TCGA-76-6191	TCGA-76-6191-01A-12D-1696-08	TCGA-76-6191-10A-01D-1696-08
GBM	TCGA-76-6192	TCGA-76-6192-01A-11D-1696-08	TCGA-76-6192-10A-01D-1696-08
GBM	TCGA-76-6193	TCGA-76-6193-01A-11D-1696-08	TCGA-76-6193-10A-01D-1696-08
GBM	TCGA-76-6280	TCGA-76-6280-01A-21D-1845-08	TCGA-76-6280-10A-01D-1845-08
GBM	TCGA-76-6282	TCGA-76-6282-01A-11D-1696-08	TCGA-76-6282-10A-01D-1696-08
GBM	TCGA-76-6283	TCGA-76-6283-01A-11D-1845-08	TCGA-76-6283-10A-01D-1845-08
GBM	TCGA-76-6285	TCGA-76-6285-01A-11D-1696-08	TCGA-76-6285-10A-01D-1696-08
GBM	TCGA-76-6286	TCGA-76-6286-01A-11D-1845-08	TCGA-76-6286-10A-01D-1845-08
GBM	TCGA-76-6657	TCGA-76-6657-01A-11D-1845-08	TCGA-76-6657-10A-01D-1845-08
GBM	TCGA-76-6660	TCGA-76-6660-01A-11D-1845-08	TCGA-76-6660-10A-01D-1845-08
GBM	TCGA-76-6661	TCGA-76-6661-01B-11D-1845-08	TCGA-76-6661-10A-01D-1845-08
GBM	TCGA-76-6662	TCGA-76-6662-01A-11D-1845-08	TCGA-76-6662-10A-01D-1845-08
GBM	TCGA-76-6663	TCGA-76-6663-01A-11D-1845-08	TCGA-76-6663-10A-01D-1845-08
GBM	TCGA-76-6664	TCGA-76-6664-01A-11D-1845-08	TCGA-76-6664-10A-01D-1845-08
GBM	TCGA-81-5910	TCGA-81-5910-01A-11D-1696-08	TCGA-81-5910-10A-01D-1696-08
GBM	TCGA-81-5911	TCGA-81-5911-01A-12D-1845-08	TCGA-81-5911-10A-01D-1845-08
GBM	TCGA-87-5896	TCGA-87-5896-01A-01D-1696-08	TCGA-87-5896-10A-01D-1696-08
GBM	TCGA-OX-A56R	TCGA-OX-A56R-01A-11D-A33T-08	TCGA-OX-A56R-10A-01D-A33W-08
GBM	TCGA-RR-A6KA	TCGA-RR-A6KA-01A-21D-A33T-08	TCGA-RR-A6KA-10A-01D-A33W-08
GBM	TCGA-RR-A6KB	TCGA-RR-A6KB-01A-12D-A33T-08	TCGA-RR-A6KB-10A-01D-A33W-08
GBM	TCGA-RR-A6KC	TCGA-RR-A6KC-01A-31D-A33T-08	TCGA-RR-A6KC-10A-01D-A33W-08

[truncated: 28 more sheets: HNSC, KICH, KIRC, KIRP, LAML, LGG, LIHC, LUAD, LUSC, MESO, OV, PCPG, PAAD, PRAD, READ, SARC, SKCM primary, SKCM metastatic, STAD, TGCT …]
