# Supplementary material for: The Somatic Mutation Landscape of UDP-Glycosyltransferase (UGT) Genes in Human Cancers
Source: Cancers (Basel). 2022 Nov 21;14(22):5708. doi: 10.3390/cancers14225708 (PMC9688768; doi:10.3390/cancers14225708)
Supplement: Supplementary file 1 [file cancers-14-05708-s001.zip › Table S2.xlsx]

## Sheet: Title
Table S2: The tumors for each of the 33 different types of TCGA cancers that had somatic mutations at UGT genes

## Sheet: ACC
Tumor_Sample_Barcode	Matched_Norm_Sample_Barcode
TCGA-OR-A5J8-01A-11D-A29I-10	TCGA-OR-A5J8-10A-01D-A29L-10
TCGA-OR-A5JA-01A-11D-A29I-10	TCGA-OR-A5JA-10A-01D-A29L-10
TCGA-OR-A5JB-01A-11D-A29I-10	TCGA-OR-A5JB-10A-01D-A29L-10
TCGA-OR-A5JJ-01A-11D-A29I-10	TCGA-OR-A5JJ-10A-01D-A29L-10
TCGA-OR-A5K9-01A-11D-A29I-10	TCGA-OR-A5K9-11A-11D-A29L-10
TCGA-OR-A5KB-01A-11D-A30A-10	TCGA-OR-A5KB-11A-11D-A30A-10
TCGA-OR-A5L6-01A-11D-A29I-10	TCGA-OR-A5L6-10C-01D-A29L-10
TCGA-PK-A5HB-01A-11D-A29I-10	TCGA-PK-A5HB-11A-11D-A29L-10
TCGA-PK-A5HC-01A-11D-A30A-10	TCGA-PK-A5HC-11A-11D-A30A-10

## Sheet: BLCA
Tumor_Sample_Barcode	Matched_Norm_Sample_Barcode
TCGA-2F-A9KO-01A-11D-A38G-08	TCGA-2F-A9KO-11A-12D-A38J-08
TCGA-2F-A9KP-01A-11D-A38G-08	TCGA-2F-A9KP-10A-01D-A38J-08
TCGA-2F-A9KQ-01A-11D-A38G-08	TCGA-2F-A9KQ-11A-11D-A38J-08
TCGA-2F-A9KW-01A-11D-A38G-08	TCGA-2F-A9KW-10A-01D-A38J-08
TCGA-4Z-AA7R-01A-11D-A391-08	TCGA-4Z-AA7R-10A-01D-A394-08
TCGA-4Z-AA7Y-01A-11D-A391-08	TCGA-4Z-AA7Y-10A-01D-A394-08
TCGA-4Z-AA82-01A-11D-A391-08	TCGA-4Z-AA82-10A-01D-A394-08
TCGA-4Z-AA83-01A-11D-A391-08	TCGA-4Z-AA83-10A-01D-A394-08
TCGA-4Z-AA86-01A-11D-A391-08	TCGA-4Z-AA86-10A-01D-A394-08
TCGA-BT-A20J-01A-11D-A14W-08	TCGA-BT-A20J-11A-11D-A14W-08
TCGA-BT-A20O-01A-21D-A14W-08	TCGA-BT-A20O-11A-11D-A14W-08
TCGA-BT-A20U-01A-11D-A14W-08	TCGA-BT-A20U-11A-11D-A14W-08
TCGA-BT-A2LA-01A-11D-A18F-08	TCGA-BT-A2LA-11A-11D-A18F-08
TCGA-BT-A2LB-01A-11D-A18F-08	TCGA-BT-A2LB-11A-11D-A18F-08
TCGA-BT-A2LD-01A-12D-A20D-08	TCGA-BT-A2LD-10A-01D-A20D-08
TCGA-BT-A3PJ-01A-21D-A21Z-08	TCGA-BT-A3PJ-10A-01D-A21Z-08
TCGA-C4-A0F1-01A-11D-A10S-08	TCGA-C4-A0F1-10A-01D-A10S-08
TCGA-C4-A0F7-01A-11D-A10S-08	TCGA-C4-A0F7-10A-01D-A10S-08
TCGA-CU-A0YR-01A-12D-A10S-08	TCGA-CU-A0YR-11A-13D-A10S-08
TCGA-CU-A3KJ-01A-11D-A21A-08	TCGA-CU-A3KJ-10A-01D-A21A-08
TCGA-DK-A1A7-01A-11D-A13W-08	TCGA-DK-A1A7-10A-01D-A13W-08
TCGA-DK-A1AC-01A-11D-A13W-08	TCGA-DK-A1AC-10A-01D-A13W-08
TCGA-DK-A2I4-01A-11D-A21A-08	TCGA-DK-A2I4-10A-01D-A21A-08
TCGA-DK-A2I6-01A-12D-A18F-08	TCGA-DK-A2I6-10A-01D-A18F-08
TCGA-DK-A3IK-01A-32D-A21A-08	TCGA-DK-A3IK-10A-01D-A21A-08
TCGA-DK-A3IQ-01A-31D-A20D-08	TCGA-DK-A3IQ-10A-01D-A20D-08
TCGA-DK-A3IT-01A-31D-A20D-08	TCGA-DK-A3IT-10A-01D-A20D-08
TCGA-DK-A3IV-01A-22D-A21A-08	TCGA-DK-A3IV-10A-01D-A21A-08
TCGA-DK-A3WW-01A-22D-A23M-08	TCGA-DK-A3WW-10A-01D-A23K-08
TCGA-DK-A3X1-01A-12D-A22Z-08	TCGA-DK-A3X1-10A-01D-A22Z-08
TCGA-DK-A6AW-01A-11D-A30E-08	TCGA-DK-A6AW-10A-01D-A30H-08
TCGA-DK-A6B1-01A-12D-A30E-08	TCGA-DK-A6B1-10A-01D-A30H-08
TCGA-DK-A6B6-01A-11D-A30E-08	TCGA-DK-A6B6-10A-01D-A30H-08
TCGA-DK-AA6L-01A-11D-A391-08	TCGA-DK-AA6L-10A-01D-A394-08
TCGA-DK-AA6S-01A-21D-A391-08	TCGA-DK-AA6S-10A-01D-A394-08
TCGA-DK-AA6U-01A-11D-A391-08	TCGA-DK-AA6U-10A-01D-A394-08
TCGA-DK-AA6W-01A-12D-A391-08	TCGA-DK-AA6W-10A-01D-A394-08
TCGA-DK-AA6X-01A-12D-A42E-08	TCGA-DK-AA6X-10A-01D-A42H-08
TCGA-DK-AA74-01A-11D-A391-08	TCGA-DK-AA74-10A-01D-A394-08
TCGA-E5-A4U1-01A-11D-A31L-08	TCGA-E5-A4U1-10B-01D-A31J-08
TCGA-E7-A541-01A-11D-A26M-08	TCGA-E7-A541-10A-01D-A26K-08
TCGA-E7-A6ME-01A-22D-A32B-08	TCGA-E7-A6ME-10B-01D-A329-08
TCGA-E7-A7DV-01A-11D-A339-08	TCGA-E7-A7DV-10A-01D-A339-08
TCGA-E7-A7XN-01A-11D-A34U-08	TCGA-E7-A7XN-10A-01D-A34X-08
TCGA-E7-A85H-01A-11D-A34U-08	TCGA-E7-A85H-10B-01D-A34X-08
TCGA-FD-A3N6-01A-11D-A21A-08	TCGA-FD-A3N6-10A-01D-A21A-08
TCGA-FD-A3SL-01A-21D-A22Z-08	TCGA-FD-A3SL-10A-01D-A22Z-08
TCGA-FD-A3SQ-01A-21D-A22Z-08	TCGA-FD-A3SQ-10A-01D-A22Z-08
TCGA-FD-A3SR-01A-11D-A22Z-08	TCGA-FD-A3SR-10A-01D-A22Z-08
TCGA-FD-A3SS-01A-12D-A22Z-08	TCGA-FD-A3SS-10A-01D-A22Z-08
TCGA-FD-A43P-01A-31D-A23U-08	TCGA-FD-A43P-10A-01D-A23U-08
TCGA-FD-A5C1-01A-11D-A289-08	TCGA-FD-A5C1-10A-01D-A289-08
TCGA-FD-A6TB-01A-12D-A339-08	TCGA-FD-A6TB-10A-21D-A339-08
TCGA-FD-A6TC-01A-21D-A339-08	TCGA-FD-A6TC-10A-21D-A339-08
TCGA-FD-A6TG-01A-11D-A32B-08	TCGA-FD-A6TG-10A-01D-A329-08
TCGA-FD-A6TI-01A-11D-A32B-08	TCGA-FD-A6TI-10A-01D-A329-08
TCGA-G2-A2EJ-01A-11D-A17V-08	TCGA-G2-A2EJ-10A-01D-A17V-08
TCGA-G2-A3IB-01A-11D-A20D-08	TCGA-G2-A3IB-10A-01D-A20D-08
TCGA-G2-AA3B-01A-11D-A391-08	TCGA-G2-AA3B-10A-01D-A394-08
TCGA-GC-A3RB-01A-12D-A21Z-08	TCGA-GC-A3RB-10A-01D-A21Z-08
TCGA-GC-A3RC-01A-11D-A22Z-08	TCGA-GC-A3RC-10B-01D-A22Z-08
TCGA-GC-A3RD-01A-12D-A22Z-08	TCGA-GC-A3RD-10B-01D-A22Z-08
TCGA-GC-A4ZW-01A-11D-A26M-08	TCGA-GC-A4ZW-10A-01D-A26K-08
TCGA-GU-A766-01A-11D-A32B-08	TCGA-GU-A766-10A-01D-A329-08
TCGA-GU-AATO-01A-11D-A391-08	TCGA-GU-AATO-10A-01D-A394-08
TCGA-K4-A3WU-01B-11D-A23M-08	TCGA-K4-A3WU-10A-01D-A23K-08
TCGA-K4-A54R-01A-11D-A26M-08	TCGA-K4-A54R-11A-11D-A26M-08
TCGA-K4-A5RJ-01A-11D-A289-08	TCGA-K4-A5RJ-10A-01D-A289-08
TCGA-K4-A6MB-01A-11D-A31L-08	TCGA-K4-A6MB-10A-01D-A31J-08
TCGA-KQ-A41N-01A-11D-A339-08	TCGA-KQ-A41N-10D-01D-A339-08
TCGA-KQ-A41P-01A-12D-A339-08	TCGA-KQ-A41P-10F-01D-A339-08
TCGA-KQ-A41Q-01A-11D-A339-08	TCGA-KQ-A41Q-10D-01D-A339-08
TCGA-KQ-A41R-01A-21D-A34U-08	TCGA-KQ-A41R-10G-01D-A34X-08
TCGA-LT-A5Z6-01A-11D-A289-08	TCGA-LT-A5Z6-10A-01D-A289-08
TCGA-MV-A51V-01A-11D-A26M-08	TCGA-MV-A51V-10A-01D-A26K-08
TCGA-SY-A9G5-01A-11D-A38G-08	TCGA-SY-A9G5-10A-01D-A38J-08
TCGA-UY-A78K-01A-11D-A339-08	TCGA-UY-A78K-10A-01D-A339-08
TCGA-UY-A78O-01A-12D-A339-08	TCGA-UY-A78O-10A-01D-A339-08
TCGA-XF-A8HD-01A-11D-A364-08	TCGA-XF-A8HD-10A-01D-A362-08
TCGA-XF-A8HG-01A-11D-A364-08	TCGA-XF-A8HG-10A-01D-A362-08
TCGA-XF-A9SG-01A-12D-A42E-08	TCGA-XF-A9SG-10A-01D-A42H-08
TCGA-XF-A9SJ-01A-11D-A391-08	TCGA-XF-A9SJ-10A-01D-A394-08
TCGA-XF-A9SP-01A-11D-A391-08	TCGA-XF-A9SP-10A-01D-A394-08
TCGA-XF-A9ST-01A-11D-A42E-08	TCGA-XF-A9ST-10A-01D-A42H-08
TCGA-XF-A9T0-01A-11D-A391-08	TCGA-XF-A9T0-10A-01D-A394-08
TCGA-XF-A9T5-01A-11D-A42E-08	TCGA-XF-A9T5-10A-01D-A42H-08
TCGA-XF-A9T8-01A-11D-A391-08	TCGA-XF-A9T8-10A-01D-A394-08
TCGA-XF-AAMG-01A-11D-A42E-08	TCGA-XF-AAMG-10A-01D-A42H-08
TCGA-XF-AAN2-01A-11D-A42E-08	TCGA-XF-AAN2-10A-01D-A42H-08
TCGA-XF-AAN5-01A-11D-A42E-08	TCGA-XF-AAN5-10A-01D-A42H-08
TCGA-YC-A89H-01A-11D-A364-08	TCGA-YC-A89H-10A-01D-A362-08
TCGA-YC-A9TC-01A-22D-A391-08	TCGA-YC-A9TC-10A-01D-A394-08
TCGA-YF-AA3L-01A-11D-A38G-08	TCGA-YF-AA3L-10A-01D-A38J-08
TCGA-ZF-A9R4-01A-11D-A38G-08	TCGA-ZF-A9R4-10A-01D-A38J-08
TCGA-ZF-A9R7-01A-11D-A38G-08	TCGA-ZF-A9R7-10A-01D-A38J-08
TCGA-ZF-A9RC-01A-11D-A38G-08	TCGA-ZF-A9RC-10A-01D-A38J-08
TCGA-ZF-A9RL-01A-11D-A38G-08	TCGA-ZF-A9RL-10A-01D-A38J-08
TCGA-ZF-A9RN-01A-11D-A42E-08	TCGA-ZF-A9RN-10A-01D-A42H-08
TCGA-ZF-AA4V-01A-11D-A38G-08	TCGA-ZF-AA4V-10A-01D-A38J-08
TCGA-ZF-AA4W-01A-12D-A38G-08	TCGA-ZF-AA4W-10A-01D-A38J-08
TCGA-ZF-AA4X-01A-11D-A38G-08	TCGA-ZF-AA4X-10A-01D-A38J-08
TCGA-ZF-AA51-01A-21D-A391-08	TCGA-ZF-AA51-10A-01D-A394-08

## Sheet: BRCA
Tumor_Sample_Barcode	Matched_Norm_Sample_Barcode
TCGA-3C-AALI-01A-11D-A41F-09	TCGA-3C-AALI-10A-01D-A41F-09
TCGA-5L-AAT0-01A-12D-A41F-09	TCGA-5L-AAT0-10A-01D-A41F-09
TCGA-5L-AAT1-01A-12D-A41F-09	TCGA-5L-AAT1-10A-01D-A41F-09
TCGA-A1-A0SK-01A-12D-A099-09	TCGA-A1-A0SK-10A-03D-A099-09
TCGA-A2-A04T-01A-21W-A050-09	TCGA-A2-A04T-10A-01W-A055-09
TCGA-A2-A0CR-01A-11D-A228-09	TCGA-A2-A0CR-10A-01D-A22A-09
TCGA-A2-A0CX-01A-21W-A019-09	TCGA-A2-A0CX-10A-01W-A021-09
TCGA-A2-A0EQ-01A-11W-A050-09	TCGA-A2-A0EQ-10A-01W-A055-09
TCGA-A2-A0SU-01A-11D-A099-09	TCGA-A2-A0SU-10A-01D-A099-09
TCGA-A2-A0T0-01A-22D-A099-09	TCGA-A2-A0T0-10A-01D-A099-09
TCGA-A2-A0YL-01A-21D-A10G-09	TCGA-A2-A0YL-10A-01D-A10G-09
TCGA-A2-A25E-01A-11D-A167-09	TCGA-A2-A25E-10A-01D-A167-09
TCGA-A2-A3Y0-01A-11D-A23C-09	TCGA-A2-A3Y0-10A-01D-A23C-09
TCGA-A7-A13D-01A-13D-A272-09	TCGA-A7-A13D-10A-02D-A272-09
TCGA-A7-A56D-01A-11D-A27P-09	TCGA-A7-A56D-10A-01D-A27P-09
TCGA-A8-A06Q-01A-11W-A050-09	TCGA-A8-A06Q-10A-01W-A055-09
TCGA-A8-A084-01A-21W-A019-09	TCGA-A8-A084-10A-01W-A021-09
TCGA-A8-A08B-01A-11W-A019-09	TCGA-A8-A08B-10A-01W-A021-09
TCGA-A8-A08R-01A-11W-A050-09	TCGA-A8-A08R-10A-01W-A055-09
TCGA-A8-A09A-01A-11W-A019-09	TCGA-A8-A09A-10A-01W-A062-09
TCGA-A8-A09Q-01A-11W-A019-09	TCGA-A8-A09Q-10A-01W-A021-09
TCGA-A8-A09T-01A-11W-A019-09	TCGA-A8-A09T-10A-01W-A021-09
TCGA-A8-A09Z-01A-11W-A019-09	TCGA-A8-A09Z-10A-01W-A021-09
TCGA-AC-A23C-01A-12D-A167-09	TCGA-AC-A23C-10A-01D-A167-09
TCGA-AC-A23H-01A-11D-A159-09	TCGA-AC-A23H-11A-12D-A17G-09
TCGA-AC-A3W5-01A-11D-A228-09	TCGA-AC-A3W5-10A-01D-A22A-09
TCGA-AC-A5XS-01A-11D-A29N-09	TCGA-AC-A5XS-10A-01D-A29N-09
TCGA-AC-A8OP-01A-11D-A36J-09	TCGA-AC-A8OP-10A-01D-A36M-09
TCGA-AN-A046-01A-21W-A050-09	TCGA-AN-A046-10A-01W-A055-09
TCGA-AN-A0AK-01A-21W-A019-09	TCGA-AN-A0AK-10A-01W-A021-09
TCGA-AN-A0AL-01A-11W-A019-09	TCGA-AN-A0AL-10A-01W-A021-09
TCGA-AN-A0FL-01A-11W-A050-09	TCGA-AN-A0FL-10A-01W-A055-09
TCGA-AO-A0J4-01A-11W-A050-09	TCGA-AO-A0J4-10A-01W-A055-09
TCGA-AO-A1KR-01A-12D-A142-09	TCGA-AO-A1KR-10A-01D-A142-09
TCGA-AO-A1KT-01A-11D-A13L-09	TCGA-AO-A1KT-10A-01D-A188-09
TCGA-AR-A1AH-01A-11D-A12B-09	TCGA-AR-A1AH-10A-01D-A12B-09
TCGA-AR-A256-01A-11D-A167-09	TCGA-AR-A256-10A-01D-A167-09
TCGA-B6-A0I9-01A-11W-A050-09	TCGA-B6-A0I9-10A-01W-A055-09
TCGA-B6-A0IK-01A-12W-A071-09	TCGA-B6-A0IK-10A-01W-A071-09
TCGA-B6-A1KF-01A-11D-A13L-09	TCGA-B6-A1KF-10A-01W-A14R-09
TCGA-BH-A0B6-01A-11D-A19Y-09	TCGA-BH-A0B6-10A-01D-A19Y-09
TCGA-BH-A0DZ-01A-11W-A019-09	TCGA-BH-A0DZ-10A-01W-A021-09
TCGA-BH-A0EE-01A-11W-A050-09	TCGA-BH-A0EE-10A-01W-A055-09
TCGA-BH-A0H6-01A-21W-A071-09	TCGA-BH-A0H6-10A-01W-A071-09
TCGA-BH-A0HA-01A-11D-A12Q-09	TCGA-BH-A0HA-11A-31D-A12Q-09
TCGA-BH-A18G-01A-11D-A12B-09	TCGA-BH-A18G-10A-01D-A12B-09
TCGA-BH-A18P-01A-11D-A12B-09	TCGA-BH-A18P-11A-43D-A12B-09
TCGA-BH-A18V-01A-11D-A12B-09	TCGA-BH-A18V-11A-52D-A12B-09
TCGA-BH-A1EW-01A-11D-A135-09	TCGA-BH-A1EW-11B-33D-A135-09
TCGA-BH-A1F8-01A-11D-A13L-09	TCGA-BH-A1F8-11B-21D-A188-09
TCGA-BH-A1FJ-01A-11D-A13L-09	TCGA-BH-A1FJ-11B-42D-A188-09
TCGA-BH-AB28-01A-31D-A41F-09	TCGA-BH-AB28-10A-01D-A41F-09
TCGA-C8-A1HK-01A-21D-A13L-09	TCGA-C8-A1HK-10A-01D-A13O-09
TCGA-C8-A26Y-01A-11D-A16D-09	TCGA-C8-A26Y-10A-01D-A16D-09
TCGA-C8-A274-01A-11D-A16D-09	TCGA-C8-A274-10A-01D-A16D-09
TCGA-C8-A27A-01A-11D-A167-09	TCGA-C8-A27A-10B-01D-A167-09
TCGA-C8-A3M7-01A-12D-A21Q-09	TCGA-C8-A3M7-10A-01D-A21Q-09
TCGA-D8-A13Y-01A-11D-A10Y-09	TCGA-D8-A13Y-10A-01D-A110-09
TCGA-D8-A142-01A-11D-A10Y-09	TCGA-D8-A142-10A-01D-A110-09
TCGA-D8-A146-01A-31D-A10Y-09	TCGA-D8-A146-10A-01D-A110-09
TCGA-D8-A1JA-01A-11D-A13L-09	TCGA-D8-A1JA-10A-01W-A14R-09
TCGA-D8-A1JD-01A-11D-A13L-09	TCGA-D8-A1JD-10A-01D-A13O-09
TCGA-D8-A1JH-01A-11D-A188-09	TCGA-D8-A1JH-10A-01D-A13O-09
TCGA-D8-A1X6-01A-11D-A14K-09	TCGA-D8-A1X6-10A-01D-A14K-09
TCGA-D8-A1X9-01A-12D-A159-09	TCGA-D8-A1X9-10A-01D-A17G-09
TCGA-D8-A1XK-01A-21D-A14K-09	TCGA-D8-A1XK-10A-01D-A14K-09
TCGA-D8-A1XQ-01A-11D-A14K-09	TCGA-D8-A1XQ-10A-01D-A14K-09
TCGA-D8-A1XY-01A-11D-A14K-09	TCGA-D8-A1XY-10A-01D-A14K-09
TCGA-D8-A1Y1-01A-21D-A14K-09	TCGA-D8-A1Y1-10A-01D-A14K-09
TCGA-D8-A27V-01A-12D-A17D-09	TCGA-D8-A27V-10A-01D-A17D-09
TCGA-E2-A109-01A-11D-A10M-09	TCGA-E2-A109-10A-01D-A10M-09
TCGA-E2-A14N-01A-31D-A135-09	TCGA-E2-A14N-10A-01D-A135-09
TCGA-E2-A152-01A-11D-A12B-09	TCGA-E2-A152-10A-01D-A12B-09
TCGA-E2-A15T-01A-11D-A10Y-09	TCGA-E2-A15T-10A-01D-A110-09
TCGA-E2-A1B0-01A-11D-A12Q-09	TCGA-E2-A1B0-10A-01D-A12Q-09
TCGA-E2-A1LG-01A-21D-A14K-09	TCGA-E2-A1LG-11A-42D-A14K-09
TCGA-E2-A1LH-01A-11D-A14G-09	TCGA-E2-A1LH-11A-22D-A14G-09
TCGA-E9-A1N3-01A-12D-A159-09	TCGA-E9-A1N3-10A-01D-A159-09
TCGA-E9-A1RF-01A-11D-A159-09	TCGA-E9-A1RF-10A-01D-A159-09
TCGA-E9-A54Y-01A-11D-A25Q-09	TCGA-E9-A54Y-10A-01D-A25Q-09
TCGA-EW-A1P4-01A-21D-A142-09	TCGA-EW-A1P4-10A-01D-A142-09
TCGA-EW-A1PB-01A-11D-A142-09	TCGA-EW-A1PB-10A-01D-A142-09
TCGA-GM-A2DC-01A-11D-A18P-09	TCGA-GM-A2DC-10C-01D-A18P-09
TCGA-GM-A2DO-01A-11D-A19Y-09	TCGA-GM-A2DO-10D-01D-A18P-09
TCGA-PE-A5DC-01A-12D-A27P-09	TCGA-PE-A5DC-10A-01D-A27P-09
TCGA-XX-A899-01A-11D-A36J-09	TCGA-XX-A899-10A-01D-A36M-09

## Sheet: CESC
Tumor_Sample_Barcode	Matched_Norm_Sample_Barcode
TCGA-2W-A8YY-01A-11D-A37N-09	TCGA-2W-A8YY-10A-01D-A37N-09
TCGA-C5-A1BI-01B-11D-A13W-08	TCGA-C5-A1BI-10A-01D-A13W-08
TCGA-C5-A1M6-01A-11D-A13W-08	TCGA-C5-A1M6-10A-01D-A13W-08
TCGA-C5-A1MP-01A-11D-A14W-08	TCGA-C5-A1MP-10A-01D-A14W-08
TCGA-C5-A7CL-01A-11D-A32I-09	TCGA-C5-A7CL-10A-01D-A32I-09
TCGA-C5-A7UE-01A-11D-A33O-09	TCGA-C5-A7UE-10A-01D-A33O-09
TCGA-C5-A8YQ-01A-11D-A37N-09	TCGA-C5-A8YQ-10A-01D-A37N-09
TCGA-C5-A8ZZ-01A-11D-A37N-09	TCGA-C5-A8ZZ-10A-01D-A37N-09
TCGA-C5-A902-01A-11D-A37N-09	TCGA-C5-A902-10A-01D-A37N-09
TCGA-C5-A907-01A-11D-A37N-09	TCGA-C5-A907-10A-01D-A37N-09
TCGA-DG-A2KK-01A-11D-A17W-09	TCGA-DG-A2KK-10A-01D-A17W-09
TCGA-DR-A0ZM-01A-12D-A10S-08	TCGA-DR-A0ZM-10A-01D-A10S-08
TCGA-DS-A0VM-01A-11D-A10S-08	TCGA-DS-A0VM-10A-01D-A10S-08
TCGA-EA-A3HS-01A-11D-A20U-09	TCGA-EA-A3HS-10B-01D-A20U-09
TCGA-EA-A3HT-01A-61D-A21Q-09	TCGA-EA-A3HT-10A-01D-A21Q-09
TCGA-EA-A3QD-01A-32D-A22X-09	TCGA-EA-A3QD-10A-01D-A22X-09
TCGA-EK-A2PG-01A-11D-A18J-09	TCGA-EK-A2PG-10A-01D-A18J-09
TCGA-EK-A2PL-01A-11D-A18J-09	TCGA-EK-A2PL-10A-01D-A18J-09
TCGA-EK-A2RD-01A-12D-A20U-09	TCGA-EK-A2RD-10A-01D-A20U-09
TCGA-EK-A3GK-01A-11D-A20U-09	TCGA-EK-A3GK-10A-01D-A20U-09
TCGA-FU-A3HZ-01A-11D-A20U-09	TCGA-FU-A3HZ-10A-01D-A20U-09
TCGA-FU-A5XV-01A-11D-A28B-09	TCGA-FU-A5XV-10A-01D-A28E-09
TCGA-FU-A770-01A-11D-A33O-09	TCGA-FU-A770-10A-01D-A33O-09
TCGA-HG-A9SC-01A-21D-A42O-09	TCGA-HG-A9SC-10A-01D-A42R-09
TCGA-IR-A3LH-01A-21D-A20U-09	TCGA-IR-A3LH-10A-01D-A20U-09
TCGA-IR-A3LK-01A-12D-A20U-09	TCGA-IR-A3LK-10A-01D-A20U-09
TCGA-IR-A3LL-01A-11D-A20U-09	TCGA-IR-A3LL-10A-01D-A20U-09
TCGA-JW-A5VL-01A-11D-A28B-09	TCGA-JW-A5VL-10A-01D-A28E-09
TCGA-JW-A852-01A-11D-A351-09	TCGA-JW-A852-10A-01D-A351-09
TCGA-JW-AAVH-01A-11D-A387-09	TCGA-JW-AAVH-10A-01D-A38A-09
TCGA-JX-A3Q0-01A-11D-A21Q-09	TCGA-JX-A3Q0-10A-01D-A21Q-09
TCGA-MA-AA3X-01A-22D-A42O-09	TCGA-MA-AA3X-10A-01D-A42R-09
TCGA-MA-AA41-01A-11D-A387-09	TCGA-MA-AA41-10A-01D-A38A-09
TCGA-MU-A8JM-01A-11D-A36J-09	TCGA-MU-A8JM-10A-01D-A36M-09
TCGA-Q1-A73O-01A-11D-A32I-09	TCGA-Q1-A73O-10B-01D-A32I-09
TCGA-Q1-A73P-01A-11D-A32I-09	TCGA-Q1-A73P-10B-01D-A32I-09
TCGA-R2-A69V-01A-11D-A32I-09	TCGA-R2-A69V-10A-01D-A32I-09
TCGA-RA-A741-01A-11D-A33O-09	TCGA-RA-A741-10B-01D-A33O-09
TCGA-UC-A7PD-01A-11D-A351-09	TCGA-UC-A7PD-11A-12D-A351-09
TCGA-VS-A94Z-01A-11D-A387-09	TCGA-VS-A94Z-10A-01D-A38A-09
TCGA-VS-A959-01A-11D-A42O-09	TCGA-VS-A959-10A-01D-A42R-09
TCGA-VS-A9U6-01A-11D-A42O-09	TCGA-VS-A9U6-10A-01D-A42R-09
TCGA-VS-A9U7-01A-11D-A42O-09	TCGA-VS-A9U7-10A-01D-A42R-09
TCGA-VS-A9UH-01A-11D-A42O-09	TCGA-VS-A9UH-10A-01D-A42R-09
TCGA-VS-A9UJ-01A-11D-A42O-09	TCGA-VS-A9UJ-10A-01D-A42R-09
TCGA-VS-A9V1-01A-11D-A42O-09	TCGA-VS-A9V1-10A-01D-A42R-09
TCGA-ZJ-AAXA-01A-11D-A42O-09	TCGA-ZJ-AAXA-10A-01D-A42R-09
TCGA-ZJ-AB0H-01A-11D-A42O-09	TCGA-ZJ-AB0H-10A-01D-A42R-09

## Sheet: CHOL
Tumor_Sample_Barcode	Matched_Norm_Sample_Barcode
TCGA-W5-AA39-01A-11D-A417-09	TCGA-W5-AA39-10A-01D-A41A-09
TCGA-ZH-A8Y5-01A-11D-A417-09	TCGA-ZH-A8Y5-10A-01D-A41A-09
TCGA-W5-AA2Q-01A-11D-A417-09	TCGA-W5-AA2Q-10A-01D-A41A-09

## Sheet: COAD
Tumor_Sample_Barcode	Matched_Norm_Sample_Barcode
TCGA-5M-AAT6-01A-11D-A40P-10	TCGA-5M-AAT6-10A-01D-A40P-10
TCGA-5M-AATE-01A-11D-A40P-10	TCGA-5M-AATE-10A-01D-A40P-10
TCGA-A6-2686-01A-01D-1408-10	TCGA-A6-2686-10A-01D-2188-10
TCGA-A6-5661-01A-01D-1650-10	TCGA-A6-5661-10A-01D-1650-10
TCGA-A6-5665-01A-01D-1650-10	TCGA-A6-5665-11A-01D-1650-10
TCGA-A6-6648-01A-11D-1771-10	TCGA-A6-6648-10A-01D-1771-10
TCGA-A6-6653-01A-11D-1771-10	TCGA-A6-6653-10A-01D-1771-10
TCGA-A6-6780-01A-11D-A270-10	TCGA-A6-6780-10A-01D-A270-10
TCGA-A6-6781-01A-22D-A270-10	TCGA-A6-6781-10A-01D-A270-10
TCGA-A6-6782-01A-11D-1835-10	TCGA-A6-6782-10A-01D-1835-10
TCGA-A6-A565-01A-31D-A28G-10	TCGA-A6-A565-10A-01D-A28G-10
TCGA-AA-3492-01A-01D-1408-10	TCGA-AA-3492-11A-01D-1408-10
TCGA-AA-3510-01A-01D-1408-10	TCGA-AA-3510-11A-01D-1408-10
TCGA-AA-3663-01A-01D-1719-10	TCGA-AA-3663-11A-01D-1719-10
TCGA-AA-3672-01A-01W-0900-09	TCGA-AA-3672-10A-01W-0900-09
TCGA-AA-3693-01A-01W-0900-09	TCGA-AA-3693-10A-01W-0900-09
TCGA-AA-3712-01A-21D-1719-10	TCGA-AA-3712-11A-01D-1719-10
TCGA-AA-3715-01A-01W-0900-09	TCGA-AA-3715-10A-01W-0900-09
TCGA-AA-3811-01A-01W-0995-10	TCGA-AA-3811-10A-01W-0995-10
TCGA-AA-3818-01A-01W-0900-09	TCGA-AA-3818-10A-01W-0900-09
TCGA-AA-3821-01A-01W-0995-10	TCGA-AA-3821-10A-01W-0995-10
TCGA-AA-3831-01A-01W-0900-09	TCGA-AA-3831-10A-01W-0900-09
TCGA-AA-3848-01A-01W-0900-09	TCGA-AA-3848-10A-01W-0900-09
TCGA-AA-3852-01A-01W-0900-09	TCGA-AA-3852-10A-01W-0900-09
TCGA-AA-3861-01A-01W-0995-10	TCGA-AA-3861-10A-01W-0995-10
TCGA-AA-3864-01A-01D-1981-10	TCGA-AA-3864-10A-01W-0995-10
TCGA-AA-3877-01A-01W-0995-10	TCGA-AA-3877-10A-01W-1982-10
TCGA-AA-3947-01A-01D-1981-10	TCGA-AA-3947-10A-01D-1982-10
TCGA-AA-3949-01A-01W-0995-10	TCGA-AA-3949-10A-01W-1982-10
TCGA-AA-3952-01A-01W-0995-10	TCGA-AA-3952-10A-01W-0995-10
TCGA-AA-3966-01A-01W-1073-09	TCGA-AA-3966-10A-01W-1073-09
TCGA-AA-3971-01A-01W-0995-10	TCGA-AA-3971-10A-01W-0999-10
TCGA-AA-3977-01A-01W-0995-10	TCGA-AA-3977-10A-01W-1982-10
TCGA-AA-3982-01A-02W-0995-10	TCGA-AA-3982-10A-01W-0999-10
TCGA-AA-3984-01A-02D-1981-10	TCGA-AA-3984-10A-01D-1982-10
TCGA-AA-3989-01A-01W-0995-10	TCGA-AA-3989-10A-01W-0999-10
TCGA-AA-A00N-01A-02D-A17O-10	TCGA-AA-A00N-10A-01D-A17O-10
TCGA-AA-A017-01A-01W-A00E-09	TCGA-AA-A017-10A-01W-A00E-09
TCGA-AA-A01P-01A-21D-A17O-10	TCGA-AA-A01P-11A-11D-A17O-10
TCGA-AA-A01R-01A-21D-A17O-10	TCGA-AA-A01R-11A-12D-A17O-10
TCGA-AA-A022-01A-21D-A17O-10	TCGA-AA-A022-11A-11D-A17O-10
TCGA-AA-A02E-01A-01W-A00E-09	TCGA-AA-A02E-10A-01W-A00E-09
TCGA-AA-A02K-01A-21W-A096-10	TCGA-AA-A02K-10A-01W-A096-10
TCGA-AA-A02O-01A-21W-A096-10	TCGA-AA-A02O-11A-11W-A096-10
TCGA-AA-A02W-01A-01W-A00E-09	TCGA-AA-A02W-10A-01W-A00E-09
TCGA-AD-5900-01A-11D-1650-10	TCGA-AD-5900-10A-01D-1650-10
TCGA-AD-6895-01A-11D-1924-10	TCGA-AD-6895-10A-01D-1924-10
TCGA-AD-6964-01A-11D-1924-10	TCGA-AD-6964-10A-01D-1924-10
TCGA-AD-A5EJ-01A-11D-A28G-10	TCGA-AD-A5EJ-10A-01D-A28G-10
TCGA-AM-5821-01A-01D-1650-10	TCGA-AM-5821-10A-01D-1650-10
TCGA-AY-4070-01A-01W-1073-09	TCGA-AY-4070-10A-01W-1073-09
TCGA-AY-6197-01A-11D-1719-10	TCGA-AY-6197-10A-01D-1719-10
TCGA-AZ-4614-01A-01D-1408-10	TCGA-AZ-4614-10A-01D-2188-10
TCGA-AZ-4615-01A-01D-1408-10	TCGA-AZ-4615-10A-01D-1408-10
TCGA-AZ-6598-01A-11D-1771-10	TCGA-AZ-6598-11A-01D-1771-10
TCGA-AZ-6601-01A-11D-1771-10	TCGA-AZ-6601-11A-01D-1771-10
TCGA-CA-5797-01A-01D-1650-10	TCGA-CA-5797-10A-01D-1650-10
TCGA-CA-6715-01A-21D-1835-10	TCGA-CA-6715-10A-01D-1835-10
TCGA-CA-6718-01A-11D-1835-10	TCGA-CA-6718-10A-01D-1835-10
TCGA-CK-4951-01A-01D-1408-10	TCGA-CK-4951-10A-01D-2188-10
TCGA-CK-5912-01A-11D-1650-10	TCGA-CK-5912-10A-01D-1650-10
TCGA-CK-5913-01A-11D-1650-10	TCGA-CK-5913-10A-01D-1650-10
TCGA-CK-5915-01A-11D-1650-10	TCGA-CK-5915-10A-01D-1650-10
TCGA-CK-5916-01A-11D-1650-10	TCGA-CK-5916-10A-01D-1650-10
TCGA-CK-6746-01A-11D-1835-10	TCGA-CK-6746-10A-01D-1835-10
TCGA-CM-4743-01A-01D-1719-10	TCGA-CM-4743-10A-01D-1719-10
TCGA-CM-4746-01A-01D-1408-10	TCGA-CM-4746-10A-01D-1408-10
TCGA-CM-4752-01A-01D-1408-10	TCGA-CM-4752-10A-01D-1408-10
TCGA-CM-5349-01A-21D-1719-10	TCGA-CM-5349-10A-01D-1719-10
TCGA-CM-5864-01A-01D-1650-10	TCGA-CM-5864-10A-01D-1650-10
TCGA-CM-6168-01A-11D-1650-10	TCGA-CM-6168-10A-01D-1650-10
TCGA-CM-6171-01A-11D-1650-10	TCGA-CM-6171-10A-01D-1650-10
TCGA-CM-6674-01A-11D-1835-10	TCGA-CM-6674-10A-01D-1835-10
TCGA-CM-6675-01A-11D-1835-10	TCGA-CM-6675-10A-01D-1835-10
TCGA-D5-5540-01A-01D-1650-10	TCGA-D5-5540-10A-01D-1650-10
TCGA-D5-6530-01A-11D-1719-10	TCGA-D5-6530-10A-01D-1719-10
TCGA-D5-6537-01A-11D-1719-10	TCGA-D5-6537-10A-01D-1719-10
TCGA-D5-6538-01A-11D-1719-10	TCGA-D5-6538-10A-01D-1719-10
TCGA-D5-6540-01A-11D-1719-10	TCGA-D5-6540-10A-01D-1719-10
TCGA-D5-6920-01A-11D-1924-10	TCGA-D5-6920-10A-01D-1924-10
TCGA-D5-6927-01A-21D-1924-10	TCGA-D5-6927-10A-01D-1924-10
TCGA-D5-6928-01A-11D-1924-10	TCGA-D5-6928-10A-01D-1924-10
TCGA-D5-6930-01A-11D-1924-10	TCGA-D5-6930-10A-01D-1924-10
TCGA-D5-6931-01A-11D-1924-10	TCGA-D5-6931-10A-01D-1924-10
TCGA-DM-A1D8-01A-11D-A152-10	TCGA-DM-A1D8-10A-01D-A152-10
TCGA-DM-A1HB-01A-21D-A183-10	TCGA-DM-A1HB-10A-01D-A183-10
TCGA-DM-A285-01A-11D-A16V-10	TCGA-DM-A285-10A-01D-A16V-10
TCGA-DM-A28K-01A-21D-A16V-10	TCGA-DM-A28K-10A-01D-A16V-10
TCGA-F4-6569-01A-11D-1771-10	TCGA-F4-6569-10A-01D-1771-10
TCGA-F4-6570-01A-11D-1771-10	TCGA-F4-6570-10A-01D-1771-10
TCGA-F4-6704-01A-11D-1835-10	TCGA-F4-6704-11A-01D-1835-10
TCGA-G4-6298-01A-11D-1719-10	TCGA-G4-6298-10A-01D-1719-10
TCGA-G4-6302-01A-11D-1719-10	TCGA-G4-6302-10A-01D-1719-10
TCGA-G4-6304-01A-11D-1924-10	TCGA-G4-6304-10A-01D-1924-10
TCGA-G4-6320-01A-11D-1719-10	TCGA-G4-6320-10A-01D-1720-10
TCGA-G4-6586-01A-11D-1771-10	TCGA-G4-6586-10A-01D-1771-10
TCGA-G4-6625-01A-21D-1771-10	TCGA-G4-6625-11A-01D-1771-10
TCGA-G4-6626-01A-11D-1771-10	TCGA-G4-6626-10A-01D-1771-10
TCGA-G4-6628-01A-11D-1835-10	TCGA-G4-6628-10A-01D-1835-10
TCGA-NH-A5IV-01A-42D-A36X-10	TCGA-NH-A5IV-10A-01D-A370-10
TCGA-RU-A8FL-01A-11D-A36X-10	TCGA-RU-A8FL-10A-01D-A370-10
TCGA-WS-AB45-01A-11D-A40P-10	TCGA-WS-AB45-10A-01D-A40P-10

## Sheet: DLBC
Tumor_Sample_Barcode	Matched_Norm_Sample_Barcode
TCGA-FF-8042-01A-11D-2210-10	TCGA-FF-8042-10A-01D-2210-10
TCGA-FF-A7CQ-01A-11D-A382-10	TCGA-FF-A7CQ-10A-01D-A385-10
TCGA-FF-A7CR-01A-11D-A382-10	TCGA-FF-A7CR-10A-01D-A385-10
TCGA-FF-A7CW-01A-11D-A382-10	TCGA-FF-A7CW-10A-01D-A385-10
TCGA-VB-A8QN-01A-11D-A382-10	TCGA-VB-A8QN-10A-01D-A385-10

## Sheet: ESCA
Tumor_Sample_Barcode	Matched_Norm_Sample_Barcode
TCGA-2H-A9GF-01A-11D-A37C-09	TCGA-2H-A9GF-11A-11D-A37F-09
TCGA-2H-A9GH-01A-11D-A37C-09	TCGA-2H-A9GH-11A-11D-A37F-09
TCGA-2H-A9GQ-01A-11D-A37C-09	TCGA-2H-A9GQ-11A-11D-A37F-09
TCGA-2H-A9GR-01A-12D-A37C-09	TCGA-2H-A9GR-11A-11D-A37F-09
TCGA-IC-A6RE-01A-11D-A33E-09	TCGA-IC-A6RE-10A-01D-A33H-09
TCGA-JY-A939-01A-12D-A37C-09	TCGA-JY-A939-10A-01D-A37F-09
TCGA-JY-A93D-01A-11D-A387-09	TCGA-JY-A93D-10A-01D-A38A-09
TCGA-JY-A93E-01A-11D-A37C-09	TCGA-JY-A93E-10A-01D-A37F-09
TCGA-L5-A43J-01A-12D-A247-09	TCGA-L5-A43J-11A-11D-A247-09
TCGA-L5-A4OJ-01A-11D-A27G-09	TCGA-L5-A4OJ-11A-12D-A27G-09
TCGA-L5-A4OT-01A-11D-A28B-09	TCGA-L5-A4OT-11A-11D-A28E-09
TCGA-L5-A88T-01A-11D-A351-09	TCGA-L5-A88T-11A-11D-A351-09
TCGA-L5-A8NF-01A-11D-A37C-09	TCGA-L5-A8NF-11A-11D-A37F-09
TCGA-LN-A49S-01A-11D-A247-09	TCGA-LN-A49S-10A-01D-A247-09
TCGA-LN-A49Y-01A-11D-A27G-09	TCGA-LN-A49Y-10A-01D-A27G-09
TCGA-LN-A7HY-01A-12D-A351-09	TCGA-LN-A7HY-10A-01D-A351-09
TCGA-R6-A6DQ-01B-11D-A31U-09	TCGA-R6-A6DQ-10A-01D-A31U-09
TCGA-R6-A6L6-01B-11D-A33E-09	TCGA-R6-A6L6-10A-01D-A33H-09
TCGA-R6-A6XG-01B-11D-A33E-09	TCGA-R6-A6XG-10A-01D-A33H-09
TCGA-V5-AASV-01A-11D-A387-09	TCGA-V5-AASV-10A-01D-A38A-09
TCGA-V5-AASW-01A-11D-A403-09	TCGA-V5-AASW-10A-01D-A403-09
TCGA-V5-AASX-01A-11D-A387-09	TCGA-V5-AASX-11A-11D-A387-09
TCGA-VR-AA4D-01A-11D-A37C-09	TCGA-VR-AA4D-10A-01D-A37F-09
TCGA-VR-AA7I-01A-11D-A403-09	TCGA-VR-AA7I-10A-01D-A403-09
TCGA-XP-A8T7-01A-11D-A36J-09	TCGA-XP-A8T7-10A-01D-A36M-09
TCGA-Z6-A8JE-01A-11D-A37C-09	TCGA-Z6-A8JE-10A-01D-A37F-09
TCGA-Z6-A9VB-01A-21D-A37C-09	TCGA-Z6-A9VB-10A-01D-A37F-09

## Sheet: GBM
Tumor_Sample_Barcode	Matched_Norm_Sample_Barcode
TCGA-02-0003-01A-01D-1490-08	TCGA-02-0003-10A-01D-1490-08
TCGA-02-2483-01A-01D-1494-08	TCGA-02-2483-10A-01D-1494-08
TCGA-06-0122-01A-01D-1490-08	TCGA-06-0122-10A-01D-1490-08
TCGA-06-0125-02A-11D-2280-08	TCGA-06-0125-10A-01D-1490-08
TCGA-06-0126-01A-01D-1490-08	TCGA-06-0126-10A-01D-1490-08
TCGA-06-0137-01A-01D-1490-08	TCGA-06-0137-10A-01D-1490-08
TCGA-06-0145-01A-01D-1490-08	TCGA-06-0145-10A-01D-1490-08
TCGA-06-0154-01A-03D-1491-08	TCGA-06-0154-10A-01D-1491-08
TCGA-06-0157-01A-01D-1491-08	TCGA-06-0157-10A-01D-1491-08
TCGA-06-0184-01A-01D-1491-08	TCGA-06-0184-10B-01D-1491-08
TCGA-06-0187-01A-01D-1491-08	TCGA-06-0187-10B-01D-1491-08
TCGA-06-0188-01A-01D-1491-08	TCGA-06-0188-10B-01D-1491-08
TCGA-06-0189-01A-01D-1491-08	TCGA-06-0189-10A-01D-1491-08
TCGA-06-0211-01B-01D-1491-08	TCGA-06-0211-10A-01D-1491-08
TCGA-06-0214-01A-02D-1491-08	TCGA-06-0214-10A-01D-1491-08
TCGA-06-0649-01B-01D-1492-08	TCGA-06-0649-10A-01D-1492-08
TCGA-06-0877-01A-01D-1492-08	TCGA-06-0877-10A-01D-1492-08
TCGA-06-1084-01A-01W-0611-08	TCGA-06-1084-10A-01W-0611-08
TCGA-06-1087-01A-02W-0611-08	TCGA-06-1087-10A-01W-0611-08
TCGA-06-1800-01A-01W-0643-08	TCGA-06-1800-10A-01W-0643-08
TCGA-06-1802-01A-01W-0643-08	TCGA-06-1802-10A-01W-0643-08
TCGA-06-1805-01A-01W-0643-08	TCGA-06-1805-10A-01W-0644-08
TCGA-06-2557-01A-01D-1494-08	TCGA-06-2557-10A-01D-1494-08
TCGA-06-2561-01A-02D-1494-08	TCGA-06-2561-10A-01D-1494-08
TCGA-06-5418-01A-01D-1486-08	TCGA-06-5418-10A-01D-1486-08
TCGA-06-5858-01A-01D-1696-08	TCGA-06-5858-10A-01D-1696-08
TCGA-06-6700-01A-12D-1845-08	TCGA-06-6700-10A-01D-1845-08
TCGA-12-0615-01A-01D-1492-08	TCGA-12-0615-10A-01D-1492-08
TCGA-12-0662-01A-01W-0348-08	TCGA-12-0662-10A-01W-0348-08
TCGA-12-0773-01A-01W-0348-08	TCGA-12-0773-10A-01W-0348-08
TCGA-12-0775-01A-01W-0348-08	TCGA-12-0775-10A-01W-0348-08
TCGA-12-0819-01A-01W-0424-08	TCGA-12-0819-10A-01W-0424-08
TCGA-12-0828-01A-01W-0424-08	TCGA-12-0828-10A-01W-0424-08
TCGA-12-1089-01A-01W-0611-08	TCGA-12-1089-10C-01W-0611-08
TCGA-14-0789-01A-01D-1492-08	TCGA-14-0789-10A-01D-1492-08
TCGA-14-1037-01A-01W-0643-08	TCGA-14-1037-10B-01W-0644-08
TCGA-14-1395-01B-11D-1845-08	TCGA-14-1395-10A-01D-1845-08
TCGA-14-1396-01A-01W-0611-08	TCGA-14-1396-10A-01W-0611-08
TCGA-14-1795-01A-01W-0643-08	TCGA-14-1795-10A-01W-0643-08
TCGA-14-1823-01A-01D-1494-08	TCGA-14-1823-10A-01D-1494-08
TCGA-15-1446-01A-01W-0611-08	TCGA-15-1446-10A-01W-0612-08
TCGA-16-0849-01A-01W-0424-08	TCGA-16-0849-10A-01W-0424-08
TCGA-16-0850-01A-01W-0424-08	TCGA-16-0850-10A-01W-0424-08
TCGA-16-1460-01A-01W-0643-08	TCGA-16-1460-10A-01W-0643-08
TCGA-19-1786-01A-01W-0643-08	TCGA-19-1786-10A-01W-0643-08
TCGA-19-1787-01B-01D-1495-08	TCGA-19-1787-10A-01D-1495-08
TCGA-19-2623-01A-01D-1495-08	TCGA-19-2623-10A-01D-1495-08
TCGA-19-2625-01A-01D-1495-08	TCGA-19-2625-10A-01D-1495-08
TCGA-19-2629-01A-01D-1495-08	TCGA-19-2629-10A-01D-1495-08
TCGA-19-5951-01A-11D-1696-08	TCGA-19-5951-10A-01D-1696-08
TCGA-19-5959-01A-11D-1696-08	TCGA-19-5959-10A-01D-1696-08
TCGA-26-1799-01A-02W-0643-08	TCGA-26-1799-10A-01W-0643-08
TCGA-26-5135-01A-01D-1486-08	TCGA-26-5135-10A-01D-1486-08
TCGA-26-5136-01B-01D-1486-08	TCGA-26-5136-10A-01D-1486-08
TCGA-26-A7UX-01B-11D-A391-08	TCGA-26-A7UX-10A-01D-A394-08
TCGA-27-1836-01A-01D-1494-08	TCGA-27-1836-10A-01D-1494-08
TCGA-27-1837-01A-01D-1494-08	TCGA-27-1837-10A-01D-1494-08
TCGA-27-2527-01A-01D-1494-08	TCGA-27-2527-10A-01D-1494-08
TCGA-27-2528-01A-01D-1494-08	TCGA-27-2528-10A-01D-1494-08
TCGA-28-2502-01B-01D-1494-08	TCGA-28-2502-10A-01D-1494-08
TCGA-28-2506-01A-02W-0837-08	TCGA-28-2506-10A-01W-0838-08
TCGA-28-5213-01A-01D-1486-08	TCGA-28-5213-10A-01D-1486-08
TCGA-28-5214-01A-01D-1486-08	TCGA-28-5214-10A-01D-1486-08
TCGA-28-5219-01A-01D-1486-08	TCGA-28-5219-10A-01D-1486-08
TCGA-28-6450-01A-11D-1696-08	TCGA-28-6450-10A-01D-1696-08
TCGA-32-1977-01A-01D-1353-08	TCGA-32-1977-10C-01D-1353-08
TCGA-32-1979-01A-01D-1696-08	TCGA-32-1979-10A-01D-1696-08
TCGA-32-2495-01A-01D-1353-08	TCGA-32-2495-10B-01D-1353-08
TCGA-32-2616-01A-01D-1495-08	TCGA-32-2616-10A-01D-1495-08
TCGA-32-5222-01A-01D-1486-08	TCGA-32-5222-10A-01D-1486-08
TCGA-41-2573-01A-01D-1495-08	TCGA-41-2573-10A-01D-1495-08
TCGA-41-5651-01A-01D-1696-08	TCGA-41-5651-10A-01D-1696-08
TCGA-74-6575-01A-11D-1845-08	TCGA-74-6575-10A-01D-1845-08
TCGA-74-6577-01A-11D-1845-08	TCGA-74-6577-10A-01D-1845-08
TCGA-74-6578-01A-11D-1845-08	TCGA-74-6578-10A-01D-1845-08
TCGA-76-6192-01A-11D-1696-08	TCGA-76-6192-10A-01D-1696-08
TCGA-76-6657-01A-11D-1845-08	TCGA-76-6657-10A-01D-1845-08
TCGA-76-6662-01A-11D-1845-08	TCGA-76-6662-10A-01D-1845-08
TCGA-76-6663-01A-11D-1845-08	TCGA-76-6663-10A-01D-1845-08
TCGA-87-5896-01A-01D-1696-08	TCGA-87-5896-10A-01D-1696-08
TCGA-OX-A56R-01A-11D-A33T-08	TCGA-OX-A56R-10A-01D-A33W-08
TCGA-RR-A6KB-01A-12D-A33T-08	TCGA-RR-A6KB-10A-01D-A33W-08

[truncated: 26 more sheets: HNSC, KICH, KIRC, KIRP, LAML, LGG, LIHC, LUAD, LUSC, MESO, OV, PCPG, PAAD, PRAD, READ, SARC, SKCM primary, SKCM metastatic , STAD, TGCT …]
