# Supplementary material for: The Somatic Mutation Landscape of UDP-Glycosyltransferase (UGT) Genes in Human Cancers
Source: Cancers (Basel). 2022 Nov 21;14(22):5708. doi: 10.3390/cancers14225708 (PMC9688768; doi:10.3390/cancers14225708)
Supplement: Supplementary file 1 [file cancers-14-05708-s001.zip › Table S3.xlsx]

## Sheet: Title 
Table S3: Somatic mutations at UGT genes for each of the 33 different types of TCGA cancers

## Sheet: ACC
Hugo_Symbol	Entrez_Gene_Id	Center	NCBI_Build	Chromosome	Start_Position	End_Position	Strand	Variant_Classification	Variant_Type	Reference_Allele	Tumor_Seq_Allele1	Tumor_Seq_Allele2	dbSNP_RS	dbSNP_Val_Status	TCGA Cancer type		Tumor_Sample_Barcode	Matched_Norm_Sample_Barcode	Match_Norm_Seq_Allele1	Match_Norm_Seq_Allele2	Tumor_Validation_Allele1	Tumor_Validation_Allele2	Match_Norm_Validation_Allele1	Match_Norm_Validation_Allele2	Verification_Status	Validation_Status	Mutation_Status	Sequencing_Phase	Sequence_Source	Validation_Method	Score	BAM_File	Sequencer	Tumor_Sample_UUID	Matched_Norm_Sample_UUID	HGVSc	HGVSp	HGVSp_Short	Transcript_ID	Exon_Number	t_depth	t_ref_count	t_alt_count	n_depth	n_ref_count	n_alt_count	all_effects	Allele	Gene
UGT1A3	0	.	GRCh37	2	234638397	234638397	+	Missense_Mutation	SNP	C	C	A	novel	.	ACC		TCGA-OR-A5JA-01A-11D-A29I-10	TCGA-OR-A5JA-10A-01D-A29L-10	C	C	.	.	.	.	.	.	.	.	.	.	.	.	.	.	.	c.625C>A	p.Gln209Lys	p.Q209K	ENST00000482026	1/5	198	154	44	259	259	0	UGT1A3,missense_variant,p.Gln209Lys,ENST00000482026,;UGT1A8,missense_variant,p.Gln209Lys,ENST00000609767,;UGT1A10,intron_variant,,ENST00000373445,;UGT1A4,intron_variant,,ENST00000373409,;UGT1A6,intron_variant,,ENST00000305139,;UGT1A6,intron_variant,,ENST00000373424,;UGT1A8,intron_variant,,ENST00000608381,;UGT1A7,intron_variant,,ENST00000373426,;UGT1A8,intron_variant,,ENST00000609637,;UGT1A5,intro…	A	ENSG00000243135
UGT1A5	0	.	GRCh37	2	234621950	234621950	+	Missense_Mutation	SNP	C	C	A	rs200200998	.	ACC		TCGA-OR-A5KB-01A-11D-A30A-10	TCGA-OR-A5KB-11A-11D-A30A-10	C	C	.	.	.	.	.	.	.	.	.	.	.	.	.	.	.	c.313C>A	p.His105Asn	p.H105N	ENST00000373414	1/5	111	76	34	123	123	0	UGT1A8,missense_variant,p.His105Asn,ENST00000608381,;UGT1A5,missense_variant,p.His105Asn,ENST00000373414,;UGT1A10,intron_variant,,ENST00000373445,;UGT1A6,intron_variant,,ENST00000305139,;UGT1A6,intron_variant,,ENST00000373424,;UGT1A7,intron_variant,,ENST00000373426,;UGT1A8,intron_variant,,ENST00000609637,;UGT1A6,intron_variant,,ENST00000406651,;UGT1A10,intron_variant,,ENST00000344644,;UGT1A8,intr…	A	ENSG00000240224
UGT1A5	0	.	GRCh37	2	234621931	234621931	+	Missense_Mutation	SNP	A	A	T	rs762192447	.	ACC		TCGA-OR-A5L6-01A-11D-A29I-10	TCGA-OR-A5L6-10C-01D-A29L-10	A	A	.	.	.	.	.	.	.	.	.	.	.	.	.	.	.	c.294A>T	p.Gln98His	p.Q98H	ENST00000373414	1/5	143	118	25	112	112	0	UGT1A8,missense_variant,p.Gln98His,ENST00000608381,;UGT1A5,missense_variant,p.Gln98His,ENST00000373414,;UGT1A10,intron_variant,,ENST00000373445,;UGT1A6,intron_variant,,ENST00000305139,;UGT1A6,intron_variant,,ENST00000373424,;UGT1A7,intron_variant,,ENST00000373426,;UGT1A8,intron_variant,,ENST00000609637,;UGT1A6,intron_variant,,ENST00000406651,;UGT1A10,intron_variant,,ENST00000344644,;UGT1A8,intron…	T	ENSG00000240224
UGT2A3	0	.	GRCh37	4	69817028	69817028	+	Missense_Mutation	SNP	C	C	A	novel	.	ACC		TCGA-OR-A5JB-01A-11D-A29I-10	TCGA-OR-A5JB-10A-01D-A29L-10	C	C	.	.	.	.	.	.	.	.	.	.	.	.	.	.	.	c.451G>T	p.Val151Leu	p.V151L	ENST00000251566	1/6	130	66	64	213	213	0	UGT2A3,missense_variant,p.Val151Leu,ENST00000251566,;UGT2A3,5_prime_UTR_variant,,ENST00000420231,;UGT2A3,missense_variant,p.Val17Leu,ENST00000503012,;	A	ENSG00000135220
UGT2A3	0	.	GRCh37	4	69817434	69817434	+	Silent	SNP	G	G	C	novel	.	ACC		TCGA-OR-A5K9-01A-11D-A29I-10	TCGA-OR-A5K9-11A-11D-A29L-10	G	G	.	.	.	.	.	.	.	.	.	.	.	.	.	.	.	c.45C>G	p.%3D	p.L15L	ENST00000251566	1/6	79	52	27	53	53	0	UGT2A3,synonymous_variant,p.%3D,ENST00000251566,;UGT2A3,upstream_gene_variant,,ENST00000420231,;UGT2A3,upstream_gene_variant,,ENST00000503012,;	C	ENSG00000135220
UGT2A3	0	.	GRCh37	4	69817435	69817435	+	Missense_Mutation	SNP	A	A	T	novel	.	ACC		TCGA-OR-A5K9-01A-11D-A29I-10	TCGA-OR-A5K9-11A-11D-A29L-10	A	A	.	.	.	.	.	.	.	.	.	.	.	.	.	.	.	c.44T>A	p.Leu15His	p.L15H	ENST00000251566	1/6	79	52	27	52	52	0	UGT2A3,missense_variant,p.Leu15His,ENST00000251566,;UGT2A3,upstream_gene_variant,,ENST00000420231,;UGT2A3,upstream_gene_variant,,ENST00000503012,;	T	ENSG00000135220
UGT2A3	0	.	GRCh37	4	69795545	69795545	+	Missense_Mutation	SNP	C	C	G	novel	.	ACC		TCGA-OR-A5KB-01A-11D-A30A-10	TCGA-OR-A5KB-11A-11D-A30A-10	C	C	.	.	.	.	.	.	.	.	.	.	.	.	.	.	.	c.1570G>C	p.Glu524Gln	p.E524Q	ENST00000251566	6/6	52	29	23	82	82	0	UGT2A3,missense_variant,p.Glu524Gln,ENST00000251566,;UGT2A3,missense_variant,p.Glu235Gln,ENST00000420231,;UGT2A3,3_prime_UTR_variant,,ENST00000503012,;	G	ENSG00000135220
UGT2B10	0	.	GRCh37	4	69696697	69696698	+	3'UTR	INS	-	-	A	rs537486832	.	ACC		TCGA-OR-A5JJ-01A-11D-A29I-10	TCGA-OR-A5JJ-10A-01D-A29L-10	-	-	.	.	.	.	.	.	.	.	.	.	.	.	.	.	.	c.*109dupA	.	.	ENST00000265403	6/6	15	7	8	11	11	0	UGT2B10,3_prime_UTR_variant,,ENST00000265403,;UGT2B10,downstream_gene_variant,,ENST00000458688,;RP11-468N14.3,downstream_gene_variant,,ENST00000512503,;	A	ENSG00000109181
UGT2B10	0	.	GRCh37	4	69682216	69682216	+	Missense_Mutation	SNP	C	C	T	novel	.	ACC		TCGA-PK-A5HB-01A-11D-A29I-10	TCGA-PK-A5HB-11A-11D-A29L-10	C	C	.	.	.	.	.	.	.	.	.	.	.	.	.	.	.	c.479C>T	p.Ala160Val	p.A160V	ENST00000265403	1/6	365	204	161	272	270	1	UGT2B10,missense_variant,p.Ala160Val,ENST00000265403,;UGT2B10,intron_variant,,ENST00000458688,;RP11-468N14.1,downstream_gene_variant,,ENST00000507455,;	T	ENSG00000109181
UGT2B17	0	.	GRCh37	4	69417567	69417567	+	Silent	SNP	C	C	T	novel	.	ACC		TCGA-OR-A5J8-01A-11D-A29I-10	TCGA-OR-A5J8-10A-01D-A29L-10	C	C	.	.	.	.	.	.	.	.	.	.	.	.	.	.	.	c.1068G>A	p.%3D	p.K356K	ENST00000317746	4/6	262	253	9	315	315	0	UGT2B17,synonymous_variant,p.%3D,ENST00000317746,;	T	ENSG00000197888
UGT3A1	0	.	GRCh37	5	35968210	35968210	+	Nonsense_Mutation	SNP	G	G	C	novel	.	ACC		TCGA-OR-A5KB-01A-11D-A30A-10	TCGA-OR-A5KB-11A-11D-A30A-10	G	G	.	.	.	.	.	.	.	.	.	.	.	.	.	.	.	c.222C>G	p.Tyr74Ter	p.Y74*	ENST00000274278	3/7	60	37	23	51	51	0	UGT3A1,stop_gained,p.Tyr74Ter,ENST00000274278,;UGT3A1,stop_gained,p.Tyr40Ter,ENST00000507113,;UGT3A1,stop_gained,p.Tyr20Ter,ENST00000333811,;UGT3A1,stop_gained,p.Tyr74Ter,ENST00000503189,;UGT3A1,intron_variant,,ENST00000513233,;UGT3A1,3_prime_UTR_variant,,ENST00000515801,;	C	ENSG00000145626
UGT3A2	0	.	GRCh37	5	36035641	36035641	+	3'UTR	SNP	G	G	T	novel	.	ACC		TCGA-OR-A5KB-01A-11D-A30A-10	TCGA-OR-A5KB-11A-11D-A30A-10	G	G	.	.	.	.	.	.	.	.	.	.	.	.	.	.	.	c.*159C>A	.	.	ENST00000282507	7/7	21	10	10	34	34	0	UGT3A2,3_prime_UTR_variant,,ENST00000513300,;UGT3A2,3_prime_UTR_variant,,ENST00000545528,;UGT3A2,3_prime_UTR_variant,,ENST00000282507,;UGT3A2,downstream_gene_variant,,ENST00000504954,;UGT3A2,3_prime_UTR_variant,,ENST00000504685,;	T	ENSG00000168671
UGT8	0	.	GRCh37	4	115544819	115544819	+	Silent	SNP	A	A	T	rs766943194	.	ACC		TCGA-OR-A5KB-01A-11D-A30A-10	TCGA-OR-A5KB-11A-11D-A30A-10	A	A	.	.	.	.	.	.	.	.	.	.	.	.	.	.	.	c.783A>T	p.%3D	p.V261V	ENST00000310836	2/6	150	65	84	111	111	0	UGT8,synonymous_variant,p.%3D,ENST00000310836,;UGT8,synonymous_variant,p.%3D,ENST00000394511,;UGT8,downstream_gene_variant,,ENST00000507710,;	T	ENSG00000174607
UGT8	0	.	GRCh37	4	115544026	115544026	+	Intron	SNP	T	T	C	novel	.	ACC		TCGA-PK-A5HC-01A-11D-A30A-10	TCGA-PK-A5HC-11A-11D-A30A-10	T	T	.	.	.	.	.	.	.	.	.	.	.	.	.	.	.	c.-2-9T>C	.	.	ENST00000310836	.	147	140	7	110	109	1	UGT8,5_prime_UTR_variant,,ENST00000394511,;UGT8,intron_variant,,ENST00000507710,;UGT8,intron_variant,,ENST00000310836,;	C	ENSG00000174607
[truncated: 66 more columns]

## Sheet: BLCA
Hugo_Symbol	Entrez_Gene_Id	Center	NCBI_Build	Chromosome	Start_Position	End_Position	Strand	Variant_Classification	Variant_Type	Reference_Allele	Tumor_Seq_Allele1	Tumor_Seq_Allele2	dbSNP_RS	dbSNP_Val_Status	cancer type		Tumor_Sample_Barcode	Matched_Norm_Sample_Barcode	Match_Norm_Seq_Allele1	Match_Norm_Seq_Allele2	Tumor_Validation_Allele1	Tumor_Validation_Allele2	Match_Norm_Validation_Allele1	Match_Norm_Validation_Allele2	Verification_Status	Validation_Status	Mutation_Status	Sequencing_Phase	Sequence_Source	Validation_Method	Score	BAM_File	Sequencer	Tumor_Sample_UUID	Matched_Norm_Sample_UUID	HGVSc	HGVSp	HGVSp_Short	Transcript_ID	Exon_Number	t_depth	t_ref_count	t_alt_count	n_depth	n_ref_count	n_alt_count	all_effects	Allele	Gene
UGT1A10	0	.	GRCh37	2	234545564	234545564	+	Missense_Mutation	SNP	A	A	T	novel	.	BLCA		TCGA-E7-A541-01A-11D-A26M-08	TCGA-E7-A541-10A-01D-A26K-08	A	A	.	.	.	.	.	.	.	.	.	.	.	.	.	.	.	c.396A>T	p.Lys132Asn	p.K132N	ENST00000344644	1/5	56	51	5	87	87	0	UGT1A10,missense_variant,p.Lys132Asn,ENST00000373445,;UGT1A10,missense_variant,p.Lys132Asn,ENST00000344644,;UGT1A8,intron_variant,,ENST00000373450,;	T	ENSG00000242515
UGT1A10	0	.	GRCh37	2	234676526	234676526	+	Missense_Mutation	SNP	C	C	T	rs144978321	.	BLCA		TCGA-FD-A3N6-01A-11D-A21A-08	TCGA-FD-A3N6-10A-01D-A21A-08	C	C	.	.	.	.	.	.	.	.	.	.	.	.	.	.	.	c.1019C>T	p.Ser340Leu	p.S340L	ENST00000344644	3/5	246	144	101	133	133	0	UGT1A10,missense_variant,p.Ser340Leu,ENST00000373445,;UGT1A4,missense_variant,p.Ser344Leu,ENST00000373409,;UGT1A6,missense_variant,p.Ser342Leu,ENST00000305139,;UGT1A3,missense_variant,p.Ser344Leu,ENST00000482026,;UGT1A6,missense_variant,p.Ser75Leu,ENST00000373424,;UGT1A8,missense_variant,p.Ser343Leu,ENST00000608383,;UGT1A8,missense_variant,p.Ser344Leu,ENST00000608381,;UGT1A7,missense_variant,p.Se…	T	ENSG00000242515
UGT1A10	0	.	GRCh37	2	234545237	234545237	+	Silent	SNP	C	C	T	rs538561016	.	BLCA		TCGA-FD-A3SQ-01A-21D-A22Z-08	TCGA-FD-A3SQ-10A-01D-A22Z-08	C	C	.	.	.	.	.	.	.	.	.	.	.	.	.	.	.	c.69C>T	p.%3D	p.A23A	ENST00000344644	1/5	119	93	26	169	169	0	UGT1A10,synonymous_variant,p.%3D,ENST00000373445,;UGT1A10,synonymous_variant,p.%3D,ENST00000344644,;UGT1A8,intron_variant,,ENST00000373450,;	T	ENSG00000242515
UGT1A10	0	.	GRCh37	2	234545740	234545740	+	Missense_Mutation	SNP	C	C	T	novel	.	BLCA		TCGA-FD-A5C1-01A-11D-A289-08	TCGA-FD-A5C1-10A-01D-A289-08	C	C	.	.	.	.	.	.	.	.	.	.	.	.	.	.	.	c.572C>T	p.Pro191Leu	p.P191L	ENST00000344644	1/5	185	170	15	179	179	0	UGT1A10,missense_variant,p.Pro191Leu,ENST00000373445,;UGT1A10,missense_variant,p.Pro191Leu,ENST00000344644,;UGT1A8,intron_variant,,ENST00000373450,;	T	ENSG00000242515
UGT1A10	0	.	GRCh37	2	234545152	234545152	+	5'UTR	SNP	C	C	T	rs761750698	.	BLCA		TCGA-FD-A6TI-01A-11D-A32B-08	TCGA-FD-A6TI-10A-01D-A329-08	C	C	.	.	.	.	.	.	.	.	.	.	.	.	.	.	.	c.-17C>T	.	.	ENST00000344644	1/5	42	36	5	60	60	0	UGT1A10,5_prime_UTR_variant,,ENST00000373445,;UGT1A10,5_prime_UTR_variant,,ENST00000344644,;UGT1A8,intron_variant,,ENST00000373450,;	T	ENSG00000242515
UGT1A10	0	.	GRCh37	2	234545777	234545777	+	Missense_Mutation	SNP	C	C	G	novel	.	BLCA		TCGA-G2-AA3B-01A-11D-A391-08	TCGA-G2-AA3B-10A-01D-A394-08	C	C	.	.	.	.	.	.	.	.	.	.	.	.	.	.	.	c.609C>G	p.Phe203Leu	p.F203L	ENST00000344644	1/5	163	138	25	196	195	0	UGT1A10,missense_variant,p.Phe203Leu,ENST00000373445,;UGT1A10,missense_variant,p.Phe203Leu,ENST00000344644,;UGT1A8,intron_variant,,ENST00000373450,;	G	ENSG00000242515
UGT1A10	0	.	GRCh37	2	234545483	234545483	+	Silent	SNP	A	A	C	rs45580232	.	BLCA		TCGA-GC-A3RC-01A-11D-A22Z-08	TCGA-GC-A3RC-10B-01D-A22Z-08	A	A	.	.	.	.	.	.	.	.	.	.	.	.	.	.	.	c.315A>C	p.%3D	p.I105I	ENST00000344644	1/5	91	73	18	127	127	0	UGT1A10,synonymous_variant,p.%3D,ENST00000373445,;UGT1A10,synonymous_variant,p.%3D,ENST00000344644,;UGT1A8,intron_variant,,ENST00000373450,;	C	ENSG00000242515
UGT1A10	0	.	GRCh37	2	234676536	234676536	+	Silent	SNP	G	G	T	rs770433443	.	BLCA		TCGA-KQ-A41N-01A-11D-A339-08	TCGA-KQ-A41N-10D-01D-A339-08	G	G	.	.	.	.	.	.	.	.	.	.	.	.	.	.	.	c.1029G>T	p.%3D	p.A343A	ENST00000344644	3/5	87	78	9	77	77	0	UGT1A10,synonymous_variant,p.%3D,ENST00000373445,;UGT1A4,synonymous_variant,p.%3D,ENST00000373409,;UGT1A6,synonymous_variant,p.%3D,ENST00000305139,;UGT1A3,synonymous_variant,p.%3D,ENST00000482026,;UGT1A6,synonymous_variant,p.%3D,ENST00000373424,;UGT1A8,synonymous_variant,p.%3D,ENST00000608383,;UGT1A8,synonymous_variant,p.%3D,ENST00000608381,;UGT1A7,synonymous_variant,p.%3D,ENST00000373426,;UGT1A8…	T	ENSG00000242515
UGT1A10	0	.	GRCh37	2	234545662	234545662	+	Missense_Mutation	SNP	C	C	G	novel	.	BLCA		TCGA-MV-A51V-01A-11D-A26M-08	TCGA-MV-A51V-10A-01D-A26K-08	C	C	.	.	.	.	.	.	.	.	.	.	.	.	.	.	.	c.494C>G	p.Ser165Cys	p.S165C	ENST00000344644	1/5	109	77	32	78	78	0	UGT1A10,missense_variant,p.Ser165Cys,ENST00000373445,;UGT1A10,missense_variant,p.Ser165Cys,ENST00000344644,;UGT1A8,intron_variant,,ENST00000373450,;	G	ENSG00000242515
UGT1A10	0	.	GRCh37	2	234545378	234545378	+	Silent	SNP	G	G	A	novel	.	BLCA		TCGA-YC-A89H-01A-11D-A364-08	TCGA-YC-A89H-10A-01D-A362-08	G	G	.	.	.	.	.	.	.	.	.	.	.	.	.	.	.	c.210G>A	p.%3D	p.L70L	ENST00000344644	1/5	107	76	31	118	118	0	UGT1A10,synonymous_variant,p.%3D,ENST00000373445,;UGT1A10,synonymous_variant,p.%3D,ENST00000344644,;UGT1A8,intron_variant,,ENST00000373450,;	A	ENSG00000242515
UGT1A10	0	.	GRCh37	2	234545731	234545731	+	Missense_Mutation	SNP	C	C	T	.	.	BLCA		TCGA-YC-A89H-01A-11D-A364-08	TCGA-YC-A89H-10A-01D-A362-08	C	C	.	.	.	.	.	.	.	.	.	.	.	.	.	.	.	c.563C>T	p.Ser188Phe	p.S188F	ENST00000344644	1/5	195	130	64	221	221	0	UGT1A10,missense_variant,p.Ser188Phe,ENST00000373445,;UGT1A10,missense_variant,p.Ser188Phe,ENST00000344644,;UGT1A8,intron_variant,,ENST00000373450,;	T	ENSG00000242515
UGT1A10	0	.	GRCh37	2	234545946	234545946	+	Missense_Mutation	SNP	G	G	A	novel	.	BLCA		TCGA-YC-A89H-01A-11D-A364-08	TCGA-YC-A89H-10A-01D-A362-08	G	G	.	.	.	.	.	.	.	.	.	.	.	.	.	.	.	c.778G>A	p.Asp260Asn	p.D260N	ENST00000344644	1/5	287	201	85	353	353	0	UGT1A10,missense_variant,p.Asp260Asn,ENST00000373445,;UGT1A10,missense_variant,p.Asp260Asn,ENST00000344644,;UGT1A8,intron_variant,,ENST00000373450,;	A	ENSG00000242515
UGT1A10	0	.	GRCh37	2	234546003	234546003	+	Nonsense_Mutation	SNP	C	C	T	novel	.	BLCA		TCGA-YC-A89H-01A-11D-A364-08	TCGA-YC-A89H-10A-01D-A362-08	C	C	.	.	.	.	.	.	.	.	.	.	.	.	.	.	.	c.835C>T	p.Gln279Ter	p.Q279*	ENST00000344644	1/5	246	169	77	323	323	0	UGT1A10,stop_gained,p.Gln279Ter,ENST00000373445,;UGT1A10,stop_gained,p.Gln279Ter,ENST00000344644,;UGT1A8,intron_variant,,ENST00000373450,;	T	ENSG00000242515
UGT1A10	0	.	GRCh37	2	234676951	234676951	+	Missense_Mutation	SNP	G	G	A	novel	.	BLCA		TCGA-ZF-AA4V-01A-11D-A38G-08	TCGA-ZF-AA4V-10A-01D-A38J-08	G	G	.	.	.	.	.	.	.	.	.	.	.	.	.	.	.	c.1161G>A	p.Met387Ile	p.M387I	ENST00000344644	4/5	93	58	35	143	143	0	UGT1A10,missense_variant,p.Met387Ile,ENST00000373445,;UGT1A4,missense_variant,p.Met391Ile,ENST00000373409,;UGT1A6,missense_variant,p.Met389Ile,ENST00000305139,;UGT1A3,missense_variant,p.Met391Ile,ENST00000482026,;UGT1A6,missense_variant,p.Met122Ile,ENST00000373424,;UGT1A8,missense_variant,p.Met390Ile,ENST00000608383,;UGT1A8,missense_variant,p.Met391Ile,ENST00000608381,;UGT1A7,missense_variant,p.M…	A	ENSG00000242515
UGT1A3	0	.	GRCh37	2	234638607	234638607	+	Missense_Mutation	SNP	A	A	G	novel	.	BLCA		TCGA-DK-AA6X-01A-12D-A42E-08	TCGA-DK-AA6X-10A-01D-A42H-08	A	A	.	.	.	.	.	.	.	.	.	.	.	.	.	.	.	c.835A>G	p.Ile279Val	p.I279V	ENST00000482026	1/5	123	84	39	153	153	0	UGT1A3,missense_variant,p.Ile279Val,ENST00000482026,;UGT1A8,missense_variant,p.Ile279Val,ENST00000609767,;UGT1A10,intron_variant,,ENST00000373445,;UGT1A4,intron_variant,,ENST00000373409,;UGT1A6,intron_variant,,ENST00000305139,;UGT1A6,intron_variant,,ENST00000373424,;UGT1A8,intron_variant,,ENST00000608381,;UGT1A7,intron_variant,,ENST00000373426,;UGT1A8,intron_variant,,ENST00000609637,;UGT1A5,intro…	G	ENSG00000243135
UGT1A3	0	.	GRCh37	2	234637770	234637770	+	5'UTR	SNP	G	G	A	novel	.	BLCA		TCGA-E7-A7XN-01A-11D-A34U-08	TCGA-E7-A7XN-10A-01D-A34X-08	G	G	.	.	.	.	.	.	.	.	.	.	.	.	.	.	.	c.-3G>A	.	.	ENST00000482026	1/5	88	71	16	47	47	0	UGT1A3,5_prime_UTR_variant,,ENST00000482026,;UGT1A10,intron_variant,,ENST00000373445,;UGT1A4,intron_variant,,ENST00000373409,;UGT1A6,intron_variant,,ENST00000305139,;UGT1A6,intron_variant,,ENST00000373424,;UGT1A8,intron_variant,,ENST00000608381,;UGT1A7,intron_variant,,ENST00000373426,;UGT1A8,intron_variant,,ENST00000609637,;UGT1A5,intron_variant,,ENST00000373414,;UGT1A6,intron_variant,,ENST000004…	A	ENSG00000243135
UGT1A3	0	.	GRCh37	2	234638530	234638530	+	Missense_Mutation	SNP	C	C	T	rs771925903	.	BLCA		TCGA-GC-A3RB-01A-12D-A21Z-08	TCGA-GC-A3RB-10A-01D-A21Z-08	C	C	.	.	.	.	.	.	.	.	.	.	.	.	.	.	.	c.758C>T	p.Ser253Phe	p.S253F	ENST00000482026	1/5	293	258	35	409	409	0	UGT1A3,missense_variant,p.Ser253Phe,ENST00000482026,;UGT1A8,missense_variant,p.Ser253Phe,ENST00000609767,;UGT1A10,intron_variant,,ENST00000373445,;UGT1A4,intron_variant,,ENST00000373409,;UGT1A6,intron_variant,,ENST00000305139,;UGT1A6,intron_variant,,ENST00000373424,;UGT1A8,intron_variant,,ENST00000608381,;UGT1A7,intron_variant,,ENST00000373426,;UGT1A8,intron_variant,,ENST00000609637,;UGT1A5,intro…	T	ENSG00000243135
UGT1A3	0	.	GRCh37	2	234638033	234638034	+	Frame_Shift_Ins	INS	-	-	GA	novel	.	BLCA		TCGA-XF-A9SG-01A-12D-A42E-08	TCGA-XF-A9SG-10A-01D-A42H-08	-	-	.	.	.	.	.	.	.	.	.	.	.	.	.	.	.	c.262_263dupGA	p.Phe89AsnfsTer20	p.F89Nfs*20	ENST00000482026	1/5	147	117	30	114	114	0	UGT1A3,frameshift_variant,p.Phe89AsnfsTer20,ENST00000482026,;UGT1A8,frameshift_variant,p.Phe89AsnfsTer20,ENST00000609767,;UGT1A10,intron_variant,,ENST00000373445,;UGT1A4,intron_variant,,ENST00000373409,;UGT1A6,intron_variant,,ENST00000305139,;UGT1A6,intron_variant,,ENST00000373424,;UGT1A8,intron_variant,,ENST00000608381,;UGT1A7,intron_variant,,ENST00000373426,;UGT1A8,intron_variant,,ENST000006096…	GA	ENSG00000243135
UGT1A3	0	.	GRCh37	2	234638460	234638460	+	Missense_Mutation	SNP	C	C	A	rs776482922	.	LIHC		TCGA-C4-A0F1-01A-11D-A10S-08	TCGA-C4-A0F1-10A-01D-A10S-08	C	C	.	.	.	.	.	.	.	.	.	.	.	.	.	.	.	c.688C>A	p.Pro230Thr	p.P230T	ENST00000482026	1/5	363	275	88	410	410	0	UGT1A3,missense_variant,p.Pro230Thr,ENST00000482026,;UGT1A8,missense_variant,p.Pro230Thr,ENST00000609767,;UGT1A10,intron_variant,,ENST00000373445,;UGT1A4,intron_variant,,ENST00000373409,;UGT1A6,intron_variant,,ENST00000305139,;UGT1A6,intron_variant,,ENST00000373424,;UGT1A8,intron_variant,,ENST00000608381,;UGT1A7,intron_variant,,ENST00000373426,;UGT1A8,intron_variant,,ENST00000609637,;UGT1A5,intro…	A	ENSG00000243135
UGT1A4	0	.	GRCh37	2	234628118	234628118	+	Missense_Mutation	SNP	C	C	G	.	.	BLCA		TCGA-E7-A541-01A-11D-A26M-08	TCGA-E7-A541-10A-01D-A26K-08	C	C	.	.	.	.	.	.	.	.	.	.	.	.	.	.	.	c.652C>G	p.Leu218Val	p.L218V	ENST00000373409	1/5	95	90	5	130	130	0	UGT1A4,missense_variant,p.Leu218Val,ENST00000373409,;UGT1A10,intron_variant,,ENST00000373445,;UGT1A6,intron_variant,,ENST00000305139,;UGT1A6,intron_variant,,ENST00000373424,;UGT1A8,intron_variant,,ENST00000608381,;UGT1A7,intron_variant,,ENST00000373426,;UGT1A8,intron_variant,,ENST00000609637,;UGT1A5,intron_variant,,ENST00000373414,;UGT1A6,intron_variant,,ENST00000406651,;UGT1A10,intron_variant,,E…	G	ENSG00000244474
UGT1A4	0	.	GRCh37	2	234680956	234680956	+	Silent	SNP	G	G	A	rs368860136	.	BLCA		TCGA-KQ-A41Q-01A-11D-A339-08	TCGA-KQ-A41Q-10D-01D-A339-08	G	G	.	.	.	.	.	.	.	.	.	.	.	.	.	.	.	c.1356G>A	p.%3D	p.P452P	ENST00000373409	5/5	67	55	11	61	61	0	UGT1A4,synonymous_variant,p.%3D,ENST00000373409,;UGT1A6,synonymous_variant,p.%3D,ENST00000305139,;UGT1A3,synonymous_variant,p.%3D,ENST00000482026,;UGT1A6,synonymous_variant,p.%3D,ENST00000373424,;UGT1A8,synonymous_variant,p.%3D,ENST00000608383,;UGT1A8,synonymous_variant,p.%3D,ENST00000608381,;UGT1A7,synonymous_variant,p.%3D,ENST00000373426,;UGT1A8,synonymous_variant,p.%3D,ENST00000609637,;UGT1A8,…	A	ENSG00000244474
UGT1A4	0	.	GRCh37	2	234628108	234628108	+	Missense_Mutation	SNP	G	G	T	novel	.	BLCA		TCGA-YC-A89H-01A-11D-A364-08	TCGA-YC-A89H-10A-01D-A362-08	G	G	.	.	.	.	.	.	.	.	.	.	.	.	.	.	.	c.642G>T	p.Met214Ile	p.M214I	ENST00000373409	1/5	157	104	52	184	184	0	UGT1A4,missense_variant,p.Met214Ile,ENST00000373409,;UGT1A10,intron_variant,,ENST00000373445,;UGT1A6,intron_variant,,ENST00000305139,;UGT1A6,intron_variant,,ENST00000373424,;UGT1A8,intron_variant,,ENST00000608381,;UGT1A7,intron_variant,,ENST00000373426,;UGT1A8,intron_variant,,ENST00000609637,;UGT1A5,intron_variant,,ENST00000373414,;UGT1A6,intron_variant,,ENST00000406651,;UGT1A10,intron_variant,,E…	T	ENSG00000244474
UGT1A5	0	.	GRCh37	2	234622344	234622344	+	Missense_Mutation	SNP	C	C	G	.	.	BLCA		TCGA-BT-A20J-01A-11D-A14W-08	TCGA-BT-A20J-11A-11D-A14W-08	C	C	.	.	.	.	.	.	.	.	.	.	.	.	.	.	.	c.707C>G	p.Ser236Cys	p.S236C	ENST00000373414	1/5	215	174	41	271	271	0	UGT1A8,missense_variant,p.Ser236Cys,ENST00000608381,;UGT1A5,missense_variant,p.Ser236Cys,ENST00000373414,;UGT1A10,intron_variant,,ENST00000373445,;UGT1A6,intron_variant,,ENST00000305139,;UGT1A6,intron_variant,,ENST00000373424,;UGT1A7,intron_variant,,ENST00000373426,;UGT1A8,intron_variant,,ENST00000609637,;UGT1A6,intron_variant,,ENST00000406651,;UGT1A10,intron_variant,,ENST00000344644,;UGT1A8,intr…	G	ENSG00000240224
UGT1A5	0	.	GRCh37	2	234621763	234621763	+	Silent	SNP	C	C	G	.	.	BLCA		TCGA-DK-A3WW-01A-22D-A23M-08	TCGA-DK-A3WW-10A-01D-A23K-08	C	C	.	.	.	.	.	.	.	.	.	.	.	.	.	.	.	c.126C>G	p.%3D	p.L42L	ENST00000373414	1/5	111	85	25	89	89	0	UGT1A8,synonymous_variant,p.%3D,ENST00000608381,;UGT1A5,synonymous_variant,p.%3D,ENST00000373414,;UGT1A10,intron_variant,,ENST00000373445,;UGT1A6,intron_variant,,ENST00000305139,;UGT1A6,intron_variant,,ENST00000373424,;UGT1A7,intron_variant,,ENST00000373426,;UGT1A8,intron_variant,,ENST00000609637,;UGT1A6,intron_variant,,ENST00000406651,;UGT1A10,intron_variant,,ENST00000344644,;UGT1A8,intron_varia…	G	ENSG00000240224
UGT1A5	0	.	GRCh37	2	234622089	234622089	+	Missense_Mutation	SNP	C	C	G	novel	.	BLCA		TCGA-E7-A85H-01A-11D-A34U-08	TCGA-E7-A85H-10B-01D-A34X-08	C	C	.	.	.	.	.	.	.	.	.	.	.	.	.	.	.	c.452C>G	p.Thr151Arg	p.T151R	ENST00000373414	1/5	345	221	123	270	270	0	UGT1A8,missense_variant,p.Thr151Arg,ENST00000608381,;UGT1A5,missense_variant,p.Thr151Arg,ENST00000373414,;UGT1A10,intron_variant,,ENST00000373445,;UGT1A6,intron_variant,,ENST00000305139,;UGT1A6,intron_variant,,ENST00000373424,;UGT1A7,intron_variant,,ENST00000373426,;UGT1A8,intron_variant,,ENST00000609637,;UGT1A6,intron_variant,,ENST00000406651,;UGT1A10,intron_variant,,ENST00000344644,;UGT1A8,intr…	G	ENSG00000240224
UGT1A5	0	.	GRCh37	2	234622085	234622085	+	Silent	SNP	C	C	T	rs28946886	.	BLCA		TCGA-K4-A6MB-01A-11D-A31L-08	TCGA-K4-A6MB-10A-01D-A31J-08	C	C	.	.	.	.	.	.	.	.	.	.	.	.	.	.	.	c.448C>T	p.%3D	p.L150L	ENST00000373414	1/5	156	98	57	210	210	0	UGT1A8,synonymous_variant,p.%3D,ENST00000608381,;UGT1A5,synonymous_variant,p.%3D,ENST00000373414,;UGT1A10,intron_variant,,ENST00000373445,;UGT1A6,intron_variant,,ENST00000305139,;UGT1A6,intron_variant,,ENST00000373424,;UGT1A7,intron_variant,,ENST00000373426,;UGT1A8,intron_variant,,ENST00000609637,;UGT1A6,intron_variant,,ENST00000406651,;UGT1A10,intron_variant,,ENST00000344644,;UGT1A8,intron_varia…	T	ENSG00000240224
UGT1A5	0	.	GRCh37	2	234622135	234622135	+	Silent	SNP	G	G	C	rs17868332	.	BLCA		TCGA-KQ-A41R-01A-21D-A34U-08	TCGA-KQ-A41R-10G-01D-A34X-08	G	G	.	.	.	.	.	.	.	.	.	.	.	.	.	.	.	c.498G>C	p.%3D	p.S166S	ENST00000373414	1/5	161	49	111	250	250	0	UGT1A8,synonymous_variant,p.%3D,ENST00000608381,;UGT1A5,synonymous_variant,p.%3D,ENST00000373414,;UGT1A10,intron_variant,,ENST00000373445,;UGT1A6,intron_variant,,ENST00000305139,;UGT1A6,intron_variant,,ENST00000373424,;UGT1A7,intron_variant,,ENST00000373426,;UGT1A8,intron_variant,,ENST00000609637,;UGT1A6,intron_variant,,ENST00000406651,;UGT1A10,intron_variant,,ENST00000344644,;UGT1A8,intron_varia…	C	ENSG00000240224
UGT1A6	0	.	GRCh37	2	234602440	234602440	+	Missense_Mutation	SNP	C	C	T	.	.	BLCA		TCGA-DK-A3IK-01A-32D-A21A-08	TCGA-DK-A3IK-10A-01D-A21A-08	C	C	.	.	.	.	.	.	.	.	.	.	.	.	.	.	.	c.790C>T	p.Pro264Ser	p.P264S	ENST00000305139	1/5	404	311	93	361	361	0	UGT1A6,missense_variant,p.Pro264Ser,ENST00000305139,;UGT1A6,splice_region_variant,,ENST00000373424,;UGT1A6,5_prime_UTR_variant,,ENST00000406651,;UGT1A10,intron_variant,,ENST00000373445,;UGT1A7,intron_variant,,ENST00000373426,;UGT1A8,intron_variant,,ENST00000609637,;UGT1A10,intron_variant,,ENST00000344644,;UGT1A8,intron_variant,,ENST00000373450,;UGT1A9,intron_variant,,ENST00000354728,;UGT1A6,downs…	T	ENSG00000167165
UGT1A6	0	.	GRCh37	2	234601626	234601626	+	5'UTR	SNP	C	C	T	rs777378989	.	BLCA		TCGA-FD-A3SL-01A-21D-A22Z-08	TCGA-FD-A3SL-10A-01D-A22Z-08	C	C	.	.	.	.	.	.	.	.	.	.	.	.	.	.	.	c.-25C>T	.	.	ENST00000305139	1/5	50	24	25	59	59	0	UGT1A6,5_prime_UTR_variant,,ENST00000305139,;UGT1A10,intron_variant,,ENST00000373445,;UGT1A6,intron_variant,,ENST00000441351,;UGT1A6,intron_variant,,ENST00000373424,;UGT1A7,intron_variant,,ENST00000373426,;UGT1A8,intron_variant,,ENST00000609637,;UGT1A10,intron_variant,,ENST00000344644,;UGT1A8,intron_variant,,ENST00000373450,;UGT1A9,intron_variant,,ENST00000354728,;UGT1A7,downstream_gene_variant,,…	T	ENSG00000167165
UGT1A6	0	.	GRCh37	2	234601975	234601975	+	Missense_Mutation	SNP	C	C	G	novel	.	BLCA		TCGA-XF-A9SP-01A-11D-A391-08	TCGA-XF-A9SP-10A-01D-A394-08	C	C	.	.	.	.	.	.	.	.	.	.	.	.	.	.	.	c.325C>G	p.Gln109Glu	p.Q109E	ENST00000305139	1/5	36	29	7	51	51	0	UGT1A6,missense_variant,p.Gln109Glu,ENST00000441351,;UGT1A6,missense_variant,p.Gln109Glu,ENST00000305139,;UGT1A10,intron_variant,,ENST00000373445,;UGT1A6,intron_variant,,ENST00000373424,;UGT1A7,intron_variant,,ENST00000373426,;UGT1A8,intron_variant,,ENST00000609637,;UGT1A10,intron_variant,,ENST00000344644,;UGT1A8,intron_variant,,ENST00000373450,;UGT1A9,intron_variant,,ENST00000354728,;UGT1A7,down…	G	ENSG00000167165
UGT1A6	0	.	GRCh37	2	234601550	234601550	+	5'UTR	SNP	C	C	A	novel	.	BLCA		TCGA-XF-A9T5-01A-11D-A42E-08	TCGA-XF-A9T5-10A-01D-A42H-08	C	C	.	.	.	.	.	.	.	.	.	.	.	.	.	.	.	c.-101C>A	.	.	ENST00000305139	1/5	14	11	3	15	15	0	UGT1A6,5_prime_UTR_variant,,ENST00000305139,;UGT1A10,intron_variant,,ENST00000373445,;UGT1A6,intron_variant,,ENST00000441351,;UGT1A6,intron_variant,,ENST00000373424,;UGT1A7,intron_variant,,ENST00000373426,;UGT1A8,intron_variant,,ENST00000609637,;UGT1A10,intron_variant,,ENST00000344644,;UGT1A8,intron_variant,,ENST00000373450,;UGT1A9,intron_variant,,ENST00000354728,;UGT1A7,downstream_gene_variant,,…	A	ENSG00000167165
UGT1A7	0	.	GRCh37	2	234591029	234591029	+	Missense_Mutation	SNP	C	C	T	rs368625224	.	BLCA		TCGA-4Z-AA83-01A-11D-A391-08	TCGA-4Z-AA83-10A-01D-A394-08	C	C	.	.	.	.	.	.	.	.	.	.	.	.	.	.	.	c.446C>T	p.Pro149Leu	p.P149L	ENST00000373426	1/5	161	89	72	164	164	0	UGT1A7,missense_variant,p.Pro149Leu,ENST00000373426,;UGT1A7,missense_variant,p.Pro6Leu,ENST00000485022,;UGT1A10,intron_variant,,ENST00000373445,;UGT1A10,intron_variant,,ENST00000344644,;UGT1A8,intron_variant,,ENST00000373450,;UGT1A8,intron_variant,,ENST00000609637,;UGT1A9,intron_variant,,ENST00000354728,;	T	ENSG00000244122
UGT1A8	0	.	GRCh37	2	234526524	234526524	+	Silent	SNP	A	A	T	rs781508993	.	BLCA		TCGA-4Z-AA86-01A-11D-A391-08	TCGA-4Z-AA86-10A-01D-A394-08	A	A	.	.	.	.	.	.	.	.	.	.	.	.	.	.	.	c.171A>T	p.%3D	p.V57V	ENST00000373450	1/5	84	79	5	101	101	0	UGT1A8,synonymous_variant,p.%3D,ENST00000373450,;	T	ENSG00000241635
UGT1A8	0	.	GRCh37	2	234669219	234669219	+	Intron	SNP	G	G	C	.	.	BLCA		TCGA-DK-A1A7-01A-11D-A13W-08	TCGA-DK-A1A7-10A-01D-A13W-08	G	G	.	.	.	.	.	.	.	.	.	.	.	.	.	.	.	c.868-6461G>C	.	.	ENST00000609767	.	210	142	67	237	237	0	UGT1A8,missense_variant,p.Gly96Arg,ENST00000608383,;UGT1A8,missense_variant,p.Gly96Arg,ENST00000360418,;UGT1A1,missense_variant,p.Gly96Arg,ENST00000305208,;UGT1A10,intron_variant,,ENST00000373445,;UGT1A4,intron_variant,,ENST00000373409,;UGT1A6,intron_variant,,ENST00000305139,;UGT1A3,intron_variant,,ENST00000482026,;UGT1A6,intron_variant,,ENST00000373424,;UGT1A8,intron_variant,,ENST00000608381,;UG…	C	ENSG00000241635
UGT1A8	0	.	GRCh37	2	234669236	234669236	+	Intron	SNP	G	G	T	.	.	BLCA		TCGA-DK-A1A7-01A-11D-A13W-08	TCGA-DK-A1A7-10A-01D-A13W-08	G	G	.	.	.	.	.	.	.	.	.	.	.	.	.	.	.	c.868-6444G>T	.	.	ENST00000609767	.	182	84	97	221	221	0	UGT1A8,missense_variant,p.Glu101Asp,ENST00000608383,;UGT1A8,missense_variant,p.Glu101Asp,ENST00000360418,;UGT1A1,missense_variant,p.Glu101Asp,ENST00000305208,;UGT1A10,intron_variant,,ENST00000373445,;UGT1A4,intron_variant,,ENST00000373409,;UGT1A6,intron_variant,,ENST00000305139,;UGT1A3,intron_variant,,ENST00000482026,;UGT1A6,intron_variant,,ENST00000373424,;UGT1A8,intron_variant,,ENST00000608381,…	T	ENSG00000241635
UGT1A8	0	.	GRCh37	2	234669682	234669682	+	Intron	SNP	C	C	G	.	.	BLCA		TCGA-DK-A1AC-01A-11D-A13W-08	TCGA-DK-A1AC-10A-01D-A13W-08	C	C	.	.	.	.	.	.	.	.	.	.	.	.	.	.	.	c.868-5998C>G	.	.	ENST00000609767	.	98	68	30	278	278	0	UGT1A8,missense_variant,p.Ser250Cys,ENST00000608383,;UGT1A8,missense_variant,p.Ser250Cys,ENST00000360418,;UGT1A1,missense_variant,p.Ser250Cys,ENST00000305208,;UGT1A10,intron_variant,,ENST00000373445,;UGT1A4,intron_variant,,ENST00000373409,;UGT1A6,intron_variant,,ENST00000305139,;UGT1A3,intron_variant,,ENST00000482026,;UGT1A6,intron_variant,,ENST00000373424,;UGT1A8,intron_variant,,ENST00000608381,…	G	ENSG00000241635
UGT1A8	0	.	GRCh37	2	234669201	234669201	+	Intron	SNP	G	G	T	novel	.	BLCA		TCGA-DK-A3IQ-01A-31D-A20D-08	TCGA-DK-A3IQ-10A-01D-A20D-08	G	G	.	.	.	.	.	.	.	.	.	.	.	.	.	.	.	c.868-6479G>T	.	.	ENST00000609767	.	188	175	12	135	135	0	UGT1A8,stop_gained,p.Glu90Ter,ENST00000608383,;UGT1A8,stop_gained,p.Glu90Ter,ENST00000360418,;UGT1A1,stop_gained,p.Glu90Ter,ENST00000305208,;UGT1A10,intron_variant,,ENST00000373445,;UGT1A4,intron_variant,,ENST00000373409,;UGT1A6,intron_variant,,ENST00000305139,;UGT1A3,intron_variant,,ENST00000482026,;UGT1A6,intron_variant,,ENST00000373424,;UGT1A8,intron_variant,,ENST00000608381,;UGT1A7,intron_var…	T	ENSG00000241635
UGT1A8	0	.	GRCh37	2	234526745	234526758	+	Frame_Shift_Del	DEL	GAAAATTAGTAGAA	GAAAATTAGTAGAA	-	novel	.	BLCA		TCGA-DK-A6AW-01A-11D-A30E-08	TCGA-DK-A6AW-10A-01D-A30H-08	GAAAATTAGTAGAA	GAAAATTAGTAGAA	.	.	.	.	.	.	.	.	.	.	.	.	.	.	.	c.392_405delGAAAATTAGTAGAA	p.Arg131LeufsTer8	p.R131Lfs*8	ENST00000373450	1/5	65	13	52	168	168	0	UGT1A8,frameshift_variant,p.Arg131LeufsTer8,ENST00000373450,;	-	ENSG00000241635
UGT1A8	0	.	GRCh37	2	234669392	234669392	+	Intron	SNP	C	C	T	rs772315032	.	BLCA		TCGA-DK-A6B6-01A-11D-A30E-08	TCGA-DK-A6B6-10A-01D-A30H-08	C	C	.	.	.	.	.	.	.	.	.	.	.	.	.	.	.	c.868-6288C>T	.	.	ENST00000609767	.	105	45	60	148	148	0	UGT1A8,synonymous_variant,p.%3D,ENST00000608383,;UGT1A8,synonymous_variant,p.%3D,ENST00000360418,;UGT1A1,synonymous_variant,p.%3D,ENST00000305208,;UGT1A10,intron_variant,,ENST00000373445,;UGT1A4,intron_variant,,ENST00000373409,;UGT1A6,intron_variant,,ENST00000305139,;UGT1A3,intron_variant,,ENST00000482026,;UGT1A6,intron_variant,,ENST00000373424,;UGT1A8,intron_variant,,ENST00000608381,;UGT1A7,intr…	T	ENSG00000241635
UGT1A8	0	.	GRCh37	2	234669122	234669122	+	Intron	SNP	C	C	T	rs191471887	.	BLCA		TCGA-DK-AA6W-01A-12D-A391-08	TCGA-DK-AA6W-10A-01D-A394-08	C	C	.	.	.	.	.	.	.	.	.	.	.	.	.	.	.	c.868-6558C>T	.	.	ENST00000609767	.	101	34	67	129	129	0	UGT1A8,synonymous_variant,p.%3D,ENST00000608383,;UGT1A8,synonymous_variant,p.%3D,ENST00000360418,;UGT1A1,synonymous_variant,p.%3D,ENST00000305208,;UGT1A10,intron_variant,,ENST00000373445,;UGT1A4,intron_variant,,ENST00000373409,;UGT1A6,intron_variant,,ENST00000305139,;UGT1A3,intron_variant,,ENST00000482026,;UGT1A6,intron_variant,,ENST00000373424,;UGT1A8,intron_variant,,ENST00000608381,;UGT1A7,intr…	T	ENSG00000241635
UGT1A8	0	.	GRCh37	2	234526713	234526713	+	Missense_Mutation	SNP	T	T	G	novel	.	BLCA		TCGA-GU-A766-01A-11D-A32B-08	TCGA-GU-A766-10A-01D-A329-08	T	T	.	.	.	.	.	.	.	.	.	.	.	.	.	.	.	c.360T>G	p.Phe120Leu	p.F120L	ENST00000373450	1/5	163	154	9	184	183	0	UGT1A8,missense_variant,p.Phe120Leu,ENST00000373450,;	G	ENSG00000241635
UGT1A8	0	.	GRCh37	2	234669649	234669650	+	Intron	DEL	AG	AG	-	rs774744039	.	BLCA		TCGA-XF-AAN5-01A-11D-A42E-08	TCGA-XF-AAN5-10A-01D-A42H-08	AG	AG	.	.	.	.	.	.	.	.	.	.	.	.	.	.	.	c.868-6025_868-6024delAG	.	.	ENST00000609767	.	92	69	23	101	101	0	UGT1A8,frameshift_variant,p.Glu241GlyfsTer16,ENST00000608383,;UGT1A8,frameshift_variant,p.Glu241GlyfsTer16,ENST00000360418,;UGT1A1,frameshift_variant,p.Glu241GlyfsTer16,ENST00000305208,;UGT1A10,intron_variant,,ENST00000373445,;UGT1A4,intron_variant,,ENST00000373409,;UGT1A6,intron_variant,,ENST00000305139,;UGT1A3,intron_variant,,ENST00000482026,;UGT1A6,intron_variant,,ENST00000373424,;UGT1A8,intro…	-	ENSG00000241635
UGT1A8	0	.	GRCh37	2	234527160	234527160	+	Missense_Mutation	SNP	G	G	A	rs772518837	.	BLCA		TCGA-YC-A89H-01A-11D-A364-08	TCGA-YC-A89H-10A-01D-A362-08	G	G	.	.	.	.	.	.	.	.	.	.	.	.	.	.	.	c.807G>A	p.Met269Ile	p.M269I	ENST00000373450	1/5	272	185	87	353	353	0	UGT1A8,missense_variant,p.Met269Ile,ENST00000373450,;	A	ENSG00000241635
UGT1A8	0	.	GRCh37	2	234526407	234526407	+	Silent	SNP	G	G	C	novel	.	BLCA		TCGA-ZF-AA4X-01A-11D-A38G-08	TCGA-ZF-AA4X-10A-01D-A38J-08	G	G	.	.	.	.	.	.	.	.	.	.	.	.	.	.	.	c.54G>C	p.%3D	p.L18L	ENST00000373450	1/5	53	44	9	82	82	0	UGT1A8,synonymous_variant,p.%3D,ENST00000373450,;	C	ENSG00000241635
UGT1A8	0	.	GRCh37	2	234669410	234669410	+	Intron	SNP	C	C	G	rs199766420	.	BLCA		TCGA-ZF-AA51-01A-21D-A391-08	TCGA-ZF-AA51-10A-01D-A394-08	C	C	.	.	.	.	.	.	.	.	.	.	.	.	.	.	.	c.868-6270C>G	.	.	ENST00000609767	.	135	110	25	108	108	0	UGT1A8,missense_variant,p.Ile159Met,ENST00000608383,;UGT1A8,missense_variant,p.Ile159Met,ENST00000360418,;UGT1A1,missense_variant,p.Ile159Met,ENST00000305208,;UGT1A10,intron_variant,,ENST00000373445,;UGT1A4,intron_variant,,ENST00000373409,;UGT1A6,intron_variant,,ENST00000305139,;UGT1A3,intron_variant,,ENST00000482026,;UGT1A6,intron_variant,,ENST00000373424,;UGT1A8,intron_variant,,ENST00000608381,…	G	ENSG00000241635
UGT1A9	0	.	GRCh37	2	234580786	234580786	+	Nonsense_Mutation	SNP	C	C	A	.	.	BLCA		TCGA-DK-A2I6-01A-12D-A18F-08	TCGA-DK-A2I6-10A-01D-A18F-08	C	C	.	.	.	.	.	.	.	.	.	.	.	.	.	.	.	c.206C>A	p.Ser69Ter	p.S69*	ENST00000354728	1/5	108	95	13	50	50	0	UGT1A8,stop_gained,p.Ser69Ter,ENST00000609637,;UGT1A9,stop_gained,p.Ser69Ter,ENST00000354728,;UGT1A10,intron_variant,,ENST00000373445,;UGT1A10,intron_variant,,ENST00000344644,;UGT1A8,intron_variant,,ENST00000373450,;	A	ENSG00000241119
UGT1A9	0	.	GRCh37	2	234581244	234581244	+	Missense_Mutation	SNP	C	C	T	rs762262088	.	BLCA		TCGA-DK-A3IK-01A-32D-A21A-08	TCGA-DK-A3IK-10A-01D-A21A-08	C	C	.	.	.	.	.	.	.	.	.	.	.	.	.	.	.	c.664C>T	p.Arg222Cys	p.R222C	ENST00000354728	1/5	202	146	55	93	92	0	UGT1A8,missense_variant,p.Arg222Cys,ENST00000609637,;UGT1A9,missense_variant,p.Arg222Cys,ENST00000354728,;UGT1A10,intron_variant,,ENST00000373445,;UGT1A10,intron_variant,,ENST00000344644,;UGT1A8,intron_variant,,ENST00000373450,;	T	ENSG00000241119
UGT1A9	0	.	GRCh37	2	234581254	234581254	+	Missense_Mutation	SNP	A	A	G	novel	.	BLCA		TCGA-ZF-A9R4-01A-11D-A38G-08	TCGA-ZF-A9R4-10A-01D-A38J-08	A	A	.	.	.	.	.	.	.	.	.	.	.	.	.	.	.	c.674A>G	p.Lys225Arg	p.K225R	ENST00000354728	1/5	228	90	137	193	193	0	UGT1A8,missense_variant,p.Lys225Arg,ENST00000609637,;UGT1A9,missense_variant,p.Lys225Arg,ENST00000354728,;UGT1A10,intron_variant,,ENST00000373445,;UGT1A10,intron_variant,,ENST00000344644,;UGT1A8,intron_variant,,ENST00000373450,;	G	ENSG00000241119
UGT2A1	0	.	GRCh37	4	70513304	70513304	+	Missense_Mutation	SNP	C	C	A	.	.	BLCA		TCGA-BT-A3PJ-01A-21D-A21Z-08	TCGA-BT-A3PJ-10A-01D-A21Z-08	C	C	.	.	.	.	.	.	.	.	.	.	.	.	.	.	.	c.59G>T	p.Gly20Val	p.G20V	ENST00000514019	2/7	22	14	8	45	45	0	UGT2A1,missense_variant,p.Gly20Val,ENST00000505512,;UGT2A1,missense_variant,p.Gly20Val,ENST00000286604,;UGT2A1,missense_variant,p.Gly20Val,ENST00000514019,;UGT2A1,missense_variant,p.Gly20Val,ENST00000512704,;UGT2A1,missense_variant,p.Gly20Val,ENST00000503640,;	A	ENSG00000270386
UGT2A1	0	.	GRCh37	4	70455266	70455266	+	Nonsense_Mutation	SNP	C	C	A	rs199765285	.	BLCA		TCGA-DK-A6AW-01A-11D-A30E-08	TCGA-DK-A6AW-10A-01D-A30H-08	C	C	.	.	.	.	.	.	.	.	.	.	.	.	.	.	.	c.1906G>T	p.Gly636Ter	p.G636*	ENST00000514019	7/7	167	85	81	210	210	0	UGT2A1,stop_gained,p.Gly470Ter,ENST00000286604,;UGT2A1,stop_gained,p.Gly636Ter,ENST00000514019,;UGT2A1,stop_gained,p.Gly470Ter,ENST00000503640,;UGT2A2,stop_gained,p.Gly436Ter,ENST00000604021,;UGT2A2,stop_gained,p.Gly479Ter,ENST00000457664,;UGT2A1,stop_gained,p.Gly426Ter,ENST00000512704,;UGT2A2,stop_gained,p.Gly480Ter,ENST00000604629,;UGT2A1,downstream_gene_variant,,ENST00000502343,;RP11-401E5.2,u…	A	ENSG00000270386
UGT2A1	0	.	GRCh37	4	70513237	70513237	+	Silent	SNP	C	C	T	rs374662759	.	BLCA		TCGA-DK-A6AW-01A-11D-A30E-08	TCGA-DK-A6AW-10A-01D-A30H-08	C	C	.	.	.	.	.	.	.	.	.	.	.	.	.	.	.	c.126G>A	p.%3D	p.E42E	ENST00000514019	2/7	38	17	20	56	56	0	UGT2A1,synonymous_variant,p.%3D,ENST00000505512,;UGT2A1,synonymous_variant,p.%3D,ENST00000286604,;UGT2A1,synonymous_variant,p.%3D,ENST00000514019,;UGT2A1,synonymous_variant,p.%3D,ENST00000512704,;UGT2A1,synonymous_variant,p.%3D,ENST00000503640,;	T	ENSG00000270386
UGT2A1	0	.	GRCh37	4	70462006	70462006	+	Missense_Mutation	SNP	T	T	C	novel	.	BLCA		TCGA-DK-AA6L-01A-11D-A391-08	TCGA-DK-AA6L-10A-01D-A394-08	T	T	.	.	.	.	.	.	.	.	.	.	.	.	.	.	.	c.958A>G	p.Asn320Asp	p.N320D	ENST00000503640	3/6	62	33	29	71	71	0	UGT2A1,missense_variant,p.Asn320Asp,ENST00000503640,;UGT2A2,missense_variant,p.Asn329Asp,ENST00000457664,;UGT2A2,missense_variant,p.Asn330Asp,ENST00000604629,;UGT2A1,intron_variant,,ENST00000286604,;UGT2A1,intron_variant,,ENST00000514019,;UGT2A2,intron_variant,,ENST00000604021,;UGT2A1,intron_variant,,ENST00000512704,;UGT2A1,intron_variant,,ENST00000502343,;UGT2A1,downstream_gene_variant,,ENST0000…	C	ENSG00000173610
UGT2A1	0	.	GRCh37	4	70465092	70465092	+	Missense_Mutation	SNP	C	C	G	novel	.	BLCA		TCGA-DK-AA6S-01A-21D-A391-08	TCGA-DK-AA6S-10A-01D-A394-08	C	C	.	.	.	.	.	.	.	.	.	.	.	.	.	.	.	c.1366G>C	p.Glu456Gln	p.E456Q	ENST00000514019	4/7	66	46	20	92	92	0	UGT2A1,missense_variant,p.Glu290Gln,ENST00000286604,;UGT2A1,missense_variant,p.Glu456Gln,ENST00000514019,;UGT2A1,missense_variant,p.Glu246Gln,ENST00000503640,;UGT2A2,missense_variant,p.Glu256Gln,ENST00000604021,;UGT2A2,missense_variant,p.Glu255Gln,ENST00000457664,;UGT2A1,missense_variant,p.Glu246Gln,ENST00000512704,;UGT2A2,missense_variant,p.Glu256Gln,ENST00000604629,;UGT2A1,non_coding_transcript…	G	ENSG00000270386
UGT2A1	0	.	GRCh37	4	70464968	70464968	+	Missense_Mutation	SNP	G	G	T	novel	.	BLCA		TCGA-KQ-A41N-01A-11D-A339-08	TCGA-KQ-A41N-10D-01D-A339-08	G	G	.	.	.	.	.	.	.	.	.	.	.	.	.	.	.	c.1490C>A	p.Pro497His	p.P497H	ENST00000514019	4/7	30	26	3	32	32	0	UGT2A1,missense_variant,p.Pro331His,ENST00000286604,;UGT2A1,missense_variant,p.Pro497His,ENST00000514019,;UGT2A1,missense_variant,p.Pro287His,ENST00000503640,;UGT2A2,missense_variant,p.Pro297His,ENST00000604021,;UGT2A2,missense_variant,p.Pro296His,ENST00000457664,;UGT2A1,missense_variant,p.Pro287His,ENST00000512704,;UGT2A2,missense_variant,p.Pro297His,ENST00000604629,;UGT2A1,non_coding_transcript…	T	ENSG00000270386
UGT2A3	0	.	GRCh37	4	69796299	69796299	+	Missense_Mutation	SNP	T	T	G	.	.	BLCA		TCGA-BT-A2LB-01A-11D-A18F-08	TCGA-BT-A2LB-11A-11D-A18F-08	T	T	.	.	.	.	.	.	.	.	.	.	.	.	.	.	.	c.1269A>C	p.Leu423Phe	p.L423F	ENST00000251566	5/6	94	80	13	140	140	0	UGT2A3,missense_variant,p.Leu423Phe,ENST00000251566,;UGT2A3,missense_variant,p.Leu134Phe,ENST00000420231,;UGT2A3,3_prime_UTR_variant,,ENST00000503012,;	G	ENSG00000135220
UGT2A3	0	.	GRCh37	4	69817427	69817427	+	Missense_Mutation	SNP	C	C	T	rs771394781	.	BLCA		TCGA-CU-A0YR-01A-12D-A10S-08	TCGA-CU-A0YR-11A-13D-A10S-08	C	C	.	.	.	.	.	.	.	.	.	.	.	.	.	.	.	c.52G>A	p.Val18Ile	p.V18I	ENST00000251566	1/6	106	74	31	140	140	0	UGT2A3,missense_variant,p.Val18Ile,ENST00000251566,;UGT2A3,upstream_gene_variant,,ENST00000420231,;UGT2A3,upstream_gene_variant,,ENST00000503012,;	T	ENSG00000135220
UGT2A3	0	.	GRCh37	4	69816788	69816788	+	Missense_Mutation	SNP	C	C	T	novel	.	BLCA		TCGA-FD-A6TC-01A-21D-A339-08	TCGA-FD-A6TC-10A-21D-A339-08	C	C	.	.	.	.	.	.	.	.	.	.	.	.	.	.	.	c.691G>A	p.Glu231Lys	p.E231K	ENST00000251566	1/6	40	34	5	60	60	0	UGT2A3,missense_variant,p.Glu231Lys,ENST00000251566,;UGT2A3,5_prime_UTR_variant,,ENST00000420231,;UGT2A3,missense_variant,p.Glu97Lys,ENST00000503012,;	T	ENSG00000135220
UGT2A3	0	.	GRCh37	4	69817286	69817286	+	Missense_Mutation	SNP	C	C	A	novel	.	BLCA		TCGA-FD-A6TG-01A-11D-A32B-08	TCGA-FD-A6TG-10A-01D-A329-08	C	C	.	.	.	.	.	.	.	.	.	.	.	.	.	.	.	c.193G>T	p.Asp65Tyr	p.D65Y	ENST00000251566	1/6	47	28	18	85	85	0	UGT2A3,missense_variant,p.Asp65Tyr,ENST00000251566,;UGT2A3,upstream_gene_variant,,ENST00000420231,;UGT2A3,upstream_gene_variant,,ENST00000503012,;	A	ENSG00000135220
UGT2A3	0	.	GRCh37	4	69811101	69811101	+	Missense_Mutation	SNP	C	C	G	.	.	BLCA		TCGA-GC-A3RD-01A-12D-A22Z-08	TCGA-GC-A3RD-10B-01D-A22Z-08	C	C	.	.	.	.	.	.	.	.	.	.	.	.	.	.	.	c.787G>C	p.Glu263Gln	p.E263Q	ENST00000251566	2/6	49	38	11	61	61	0	UGT2A3,missense_variant,p.Glu263Gln,ENST00000251566,;UGT2A3,5_prime_UTR_variant,,ENST00000420231,;UGT2A3,missense_variant,p.Glu129Gln,ENST00000503012,;	G	ENSG00000135220
UGT2A3	0	.	GRCh37	4	69798423	69798423	+	Silent	SNP	G	G	A	novel	.	BLCA		TCGA-K4-A5RJ-01A-11D-A289-08	TCGA-K4-A5RJ-10A-01D-A289-08	G	G	.	.	.	.	.	.	.	.	.	.	.	.	.	.	.	c.919C>T	p.%3D	p.L307L	ENST00000251566	3/6	180	158	22	134	134	0	UGT2A3,synonymous_variant,p.%3D,ENST00000251566,;UGT2A3,synonymous_variant,p.%3D,ENST00000420231,;UGT2A3,3_prime_UTR_variant,,ENST00000503012,;	A	ENSG00000135220
UGT2A3	0	.	GRCh37	4	69817335	69817335	+	Silent	SNP	C	C	T	.	.	BLCA		TCGA-XF-A9SJ-01A-11D-A391-08	TCGA-XF-A9SJ-10A-01D-A394-08	C	C	.	.	.	.	.	.	.	.	.	.	.	.	.	.	.	c.144G>A	p.%3D	p.V48V	ENST00000251566	1/6	56	50	6	96	96	0	UGT2A3,synonymous_variant,p.%3D,ENST00000251566,;UGT2A3,upstream_gene_variant,,ENST00000420231,;UGT2A3,upstream_gene_variant,,ENST00000503012,;	T	ENSG00000135220
UGT2B10	0	.	GRCh37	4	69692212	69692212	+	Silent	SNP	C	C	T	.	.	BLCA		TCGA-BT-A20O-01A-21D-A14W-08	TCGA-BT-A20O-11A-11D-A14W-08	C	C	.	.	.	.	.	.	.	.	.	.	.	.	.	.	.	c.1084C>T	p.%3D	p.L362L	ENST00000265403	4/6	71	65	5	92	92	0	UGT2B10,synonymous_variant,p.%3D,ENST00000265403,;UGT2B10,synonymous_variant,p.%3D,ENST00000458688,;	T	ENSG00000109181
UGT2B10	0	.	GRCh37	4	69696436	69696436	+	Nonsense_Mutation	SNP	C	C	T	rs754651977	.	BLCA		TCGA-BT-A2LA-01A-11D-A18F-08	TCGA-BT-A2LA-11A-11D-A18F-08	C	C	.	.	.	.	.	.	.	.	.	.	.	.	.	.	.	c.1426C>T	p.Arg476Ter	p.R476*	ENST00000265403	6/6	192	131	61	190	190	0	UGT2B10,stop_gained,p.Arg476Ter,ENST00000265403,;UGT2B10,stop_gained,p.Arg392Ter,ENST00000458688,;RP11-468N14.3,downstream_gene_variant,,ENST00000512503,;	T	ENSG00000109181
UGT2B10	0	.	GRCh37	4	69687995	69687995	+	Missense_Mutation	SNP	G	G	A	novel	.	BLCA		TCGA-DK-A6AW-01A-11D-A30E-08	TCGA-DK-A6AW-10A-01D-A30H-08	G	G	.	.	.	.	.	.	.	.	.	.	.	.	.	.	.	c.874G>A	p.Glu292Lys	p.E292K	ENST00000265403	3/6	198	103	95	228	228	0	UGT2B10,missense_variant,p.Glu292Lys,ENST00000265403,;UGT2B10,missense_variant,p.Glu208Lys,ENST00000458688,;	A	ENSG00000109181
UGT2B10	0	.	GRCh37	4	69683744	69683744	+	Intron	SNP	C	C	G	novel	.	BLCA		TCGA-K4-A54R-01A-11D-A26M-08	TCGA-K4-A54R-11A-11D-A26M-08	C	C	.	.	.	.	.	.	.	.	.	.	.	.	.	.	.	c.719-3C>G	.	.	ENST00000265403	.	50	40	10	54	54	0	UGT2B10,splice_region_variant,,ENST00000265403,;UGT2B10,splice_region_variant,,ENST00000458688,;RP11-468N14.1,downstream_gene_variant,,ENST00000507455,;	G	ENSG00000109181
UGT2B10	0	.	GRCh37	4	69683848	69683848	+	Missense_Mutation	SNP	G	G	T	novel	.	BLCA		TCGA-KQ-A41N-01A-11D-A339-08	TCGA-KQ-A41N-10D-01D-A339-08	G	G	.	.	.	.	.	.	.	.	.	.	.	.	.	.	.	c.820G>T	p.Asp274Tyr	p.D274Y	ENST00000265403	2/6	172	157	14	200	200	0	UGT2B10,missense_variant,p.Asp274Tyr,ENST00000265403,;UGT2B10,missense_variant,p.Asp190Tyr,ENST00000458688,;RP11-468N14.1,downstream_gene_variant,,ENST00000507455,;	T	ENSG00000109181
UGT2B10	0	.	GRCh37	4	69696470	69696470	+	Missense_Mutation	SNP	A	A	C	novel	.	BLCA		TCGA-XF-A8HG-01A-11D-A364-08	TCGA-XF-A8HG-10A-01D-A362-08	A	A	.	.	.	.	.	.	.	.	.	.	.	.	.	.	.	c.1460A>C	p.Tyr487Ser	p.Y487S	ENST00000265403	6/6	175	120	54	155	155	0	UGT2B10,missense_variant,p.Tyr487Ser,ENST00000265403,;UGT2B10,missense_variant,p.Tyr403Ser,ENST00000458688,;RP11-468N14.3,downstream_gene_variant,,ENST00000512503,;	C	ENSG00000109181
UGT2B10	0	.	GRCh37	4	69682209	69682209	+	Missense_Mutation	SNP	C	C	G	rs552800373	.	BLCA		TCGA-XF-A9ST-01A-11D-A42E-08	TCGA-XF-A9ST-10A-01D-A42H-08	C	C	.	.	.	.	.	.	.	.	.	.	.	.	.	.	.	c.472C>G	p.Leu158Val	p.L158V	ENST00000265403	1/6	105	82	23	130	130	0	UGT2B10,missense_variant,p.Leu158Val,ENST00000265403,;UGT2B10,splice_region_variant,,ENST00000458688,;RP11-468N14.1,downstream_gene_variant,,ENST00000507455,;	G	ENSG00000109181
UGT2B11	0	.	GRCh37	4	70066403	70066403	+	Nonsense_Mutation	SNP	G	G	A	rs202195427	.	BLCA		TCGA-2F-A9KW-01A-11D-A38G-08	TCGA-2F-A9KW-10A-01D-A38J-08	G	G	.	.	.	.	.	.	.	.	.	.	.	.	.	.	.	c.1345C>T	p.Gln449Ter	p.Q449*	ENST00000446444	6/6	162	111	50	137	137	0	UGT2B11,stop_gained,p.Gln449Ter,ENST00000446444,;RP11-704M14.1,intron_variant,,ENST00000504301,;RP11-704M14.1,intron_variant,,ENST00000505646,;UGT2B11,downstream_gene_variant,,ENST00000513315,;	A	ENSG00000213759
UGT2B11	0	.	GRCh37	4	70080532	70080532	+	5'Flank	SNP	C	C	T	novel	.	BLCA		TCGA-4Z-AA7Y-01A-11D-A391-08	TCGA-4Z-AA7Y-10A-01D-A394-08	C	C	.	.	.	.	.	.	.	.	.	.	.	.	.	.	.	.	.	.	ENST00000446444	.	49	28	21	32	32	0	UGT2B11,upstream_gene_variant,,ENST00000446444,;RP11-704M14.1,non_coding_transcript_exon_variant,,ENST00000505646,;RP11-704M14.1,downstream_gene_variant,,ENST00000504301,;RP11-704M14.2,downstream_gene_variant,,ENST00000514003,;	T	ENSG00000213759
UGT2B11	0	.	GRCh37	4	70080466	70080466	+	5'Flank	SNP	C	C	G	novel	.	BLCA		TCGA-BT-A20U-01A-11D-A14W-08	TCGA-BT-A20U-11A-11D-A14W-08	C	C	.	.	.	.	.	.	.	.	.	.	.	.	.	.	.	.	.	.	ENST00000446444	.	60	49	11	147	147	0	UGT2B11,upstream_gene_variant,,ENST00000446444,;RP11-704M14.1,non_coding_transcript_exon_variant,,ENST00000505646,;RP11-704M14.1,downstream_gene_variant,,ENST00000504301,;RP11-704M14.2,downstream_gene_variant,,ENST00000514003,;	G	ENSG00000213759
UGT2B11	0	.	GRCh37	4	70071201	70071201	+	Missense_Mutation	SNP	G	G	C	.	.	BLCA		TCGA-CU-A3KJ-01A-11D-A21A-08	TCGA-CU-A3KJ-10A-01D-A21A-08	G	G	.	.	.	.	.	.	.	.	.	.	.	.	.	.	.	c.1087C>G	p.Leu363Val	p.L363V	ENST00000446444	4/6	105	80	25	138	138	0	UGT2B11,missense_variant,p.Leu363Val,ENST00000446444,;RP11-704M14.1,intron_variant,,ENST00000504301,;RP11-704M14.1,intron_variant,,ENST00000505646,;UGT2B11,non_coding_transcript_exon_variant,,ENST00000513315,;	C	ENSG00000213759
UGT2B11	0	.	GRCh37	4	70071251	70071251	+	Missense_Mutation	SNP	G	G	A	rs143304000	.	BLCA		TCGA-DK-A6AW-01A-11D-A30E-08	TCGA-DK-A6AW-10A-01D-A30H-08	G	G	.	.	.	.	.	.	.	.	.	.	.	.	.	.	.	c.1037C>T	p.Ala346Val	p.A346V	ENST00000446444	4/6	116	62	53	132	132	0	UGT2B11,missense_variant,p.Ala346Val,ENST00000446444,;RP11-704M14.1,intron_variant,,ENST00000504301,;RP11-704M14.1,intron_variant,,ENST00000505646,;UGT2B11,non_coding_transcript_exon_variant,,ENST00000513315,;	A	ENSG00000213759
UGT2B11	0	.	GRCh37	4	70066216	70066216	+	Missense_Mutation	SNP	A	A	G	novel	.	BLCA		TCGA-KQ-A41R-01A-21D-A34U-08	TCGA-KQ-A41R-10G-01D-A34X-08	A	A	.	.	.	.	.	.	.	.	.	.	.	.	.	.	.	c.1532T>C	p.Phe511Ser	p.F511S	ENST00000446444	6/6	186	117	69	143	143	0	UGT2B11,missense_variant,p.Phe511Ser,ENST00000446444,;RP11-704M14.1,non_coding_transcript_exon_variant,,ENST00000504301,;RP11-704M14.1,non_coding_transcript_exon_variant,,ENST00000505646,;UGT2B11,downstream_gene_variant,,ENST00000513315,;	G	ENSG00000213759
UGT2B11	0	.	GRCh37	4	70074116	70074116	+	Missense_Mutation	SNP	C	C	G	.	.	BLCA		TCGA-YC-A9TC-01A-22D-A391-08	TCGA-YC-A9TC-10A-01D-A394-08	C	C	.	.	.	.	.	.	.	.	.	.	.	.	.	.	.	c.955G>C	p.Glu319Gln	p.E319Q	ENST00000446444	3/6	247	145	102	204	204	0	UGT2B11,missense_variant,p.Glu319Gln,ENST00000446444,;RP11-704M14.1,intron_variant,,ENST00000504301,;RP11-704M14.1,intron_variant,,ENST00000505646,;UGT2B11,upstream_gene_variant,,ENST00000513315,;	G	ENSG00000213759
UGT2B11	0	.	GRCh37	4	70080566	70080566	+	5'Flank	SNP	G	G	A	novel	.	BLCA		TCGA-ZF-AA4V-01A-11D-A38G-08	TCGA-ZF-AA4V-10A-01D-A38J-08	G	G	.	.	.	.	.	.	.	.	.	.	.	.	.	.	.	.	.	.	ENST00000446444	.	17	10	7	29	29	0	UGT2B11,upstream_gene_variant,,ENST00000446444,;RP11-704M14.1,non_coding_transcript_exon_variant,,ENST00000505646,;RP11-704M14.1,downstream_gene_variant,,ENST00000504301,;RP11-704M14.2,downstream_gene_variant,,ENST00000514003,;	A	ENSG00000213759
UGT2B15	0	.	GRCh37	4	69535709	69535709	+	Nonsense_Mutation	SNP	C	C	A	novel	.	BLCA		TCGA-4Z-AA82-01A-11D-A391-08	TCGA-4Z-AA82-10A-01D-A394-08	C	C	.	.	.	.	.	.	.	.	.	.	.	.	.	.	.	c.628G>T	p.Glu210Ter	p.E210*	ENST00000338206	1/6	117	80	36	159	159	0	UGT2B15,stop_gained,p.Glu210Ter,ENST00000338206,;	A	ENSG00000196620
UGT2B15	0	.	GRCh37	4	69536086	69536086	+	Missense_Mutation	SNP	T	T	A	rs754137691	.	BLCA		TCGA-DK-A6AW-01A-11D-A30E-08	TCGA-DK-A6AW-10A-01D-A30H-08	T	T	.	.	.	.	.	.	.	.	.	.	.	.	.	.	.	c.251A>T	p.Asn84Ile	p.N84I	ENST00000338206	1/6	159	82	77	167	167	0	UGT2B15,missense_variant,p.Asn84Ile,ENST00000338206,;	A	ENSG00000196620
UGT2B15	0	.	GRCh37	4	69512827	69512827	+	Missense_Mutation	SNP	C	C	G	novel	.	BLCA		TCGA-DK-A6B6-01A-11D-A30E-08	TCGA-DK-A6B6-10A-01D-A30H-08	C	C	.	.	.	.	.	.	.	.	.	.	.	.	.	.	.	c.1588G>C	p.Asp530His	p.D530H	ENST00000338206	6/6	126	90	35	153	153	0	UGT2B15,missense_variant,p.Asp530His,ENST00000338206,;	G	ENSG00000196620
UGT2B15	0	.	GRCh37	4	69512743	69512743	+	3'UTR	SNP	C	C	T	rs572290060	.	BLCA		TCGA-G2-AA3B-01A-11D-A391-08	TCGA-G2-AA3B-10A-01D-A394-08	C	C	.	.	.	.	.	.	.	.	.	.	.	.	.	.	.	c.*79G>A	.	.	ENST00000338206	6/6	29	23	6	46	46	0	UGT2B15,3_prime_UTR_variant,,ENST00000338206,;	T	ENSG00000196620
UGT2B15	0	.	GRCh37	4	69512806	69512806	+	3'UTR	SNP	C	C	T	rs753306291	.	BLCA		TCGA-G2-AA3B-01A-11D-A391-08	TCGA-G2-AA3B-10A-01D-A394-08	C	C	.	.	.	.	.	.	.	.	.	.	.	.	.	.	.	c.*16G>A	.	.	ENST00000338206	6/6	99	84	15	111	111	0	UGT2B15,3_prime_UTR_variant,,ENST00000338206,;	T	ENSG00000196620
UGT2B15	0	.	GRCh37	4	69519769	69519769	+	Silent	SNP	G	G	C	novel	.	BLCA		TCGA-GC-A4ZW-01A-11D-A26M-08	TCGA-GC-A4ZW-10A-01D-A26K-08	G	G	.	.	.	.	.	.	.	.	.	.	.	.	.	.	.	c.1299C>G	p.%3D	p.V433V	ENST00000338206	5/6	160	136	23	127	127	0	UGT2B15,synonymous_variant,p.%3D,ENST00000338206,;	C	ENSG00000196620
UGT2B15	0	.	GRCh37	4	69512792	69512792	+	3'UTR	SNP	C	C	T	rs370951770	.	BLCA		TCGA-K4-A54R-01A-11D-A26M-08	TCGA-K4-A54R-11A-11D-A26M-08	C	C	.	.	.	.	.	.	.	.	.	.	.	.	.	.	.	c.*30G>A	.	.	ENST00000338206	6/6	59	38	20	58	58	0	UGT2B15,3_prime_UTR_variant,,ENST00000338206,;	T	ENSG00000196620
UGT2B15	0	.	GRCh37	4	69520865	69520865	+	Silent	SNP	A	A	C	novel	.	BLCA		TCGA-KQ-A41P-01A-12D-A339-08	TCGA-KQ-A41P-10F-01D-A339-08	A	A	.	.	.	.	.	.	.	.	.	.	.	.	.	.	.	c.1041T>G	p.%3D	p.T347T	ENST00000338206	4/6	114	80	34	146	146	0	UGT2B15,synonymous_variant,p.%3D,ENST00000338206,;	C	ENSG00000196620
UGT2B15	0	.	GRCh37	4	69535910	69535910	+	Missense_Mutation	SNP	C	C	G	novel	.	BLCA		TCGA-UY-A78K-01A-11D-A339-08	TCGA-UY-A78K-10A-01D-A339-08	C	C	.	.	.	.	.	.	.	.	.	.	.	.	.	.	.	c.427G>C	p.Glu143Gln	p.E143Q	ENST00000338206	1/6	341	310	31	231	231	0	UGT2B15,missense_variant,p.Glu143Gln,ENST00000338206,;	G	ENSG00000196620
UGT2B15	0	.	GRCh37	4	69533876	69533876	+	Missense_Mutation	SNP	C	C	T	novel	.	BLCA		TCGA-XF-A9T0-01A-11D-A391-08	TCGA-XF-A9T0-10A-01D-A394-08	C	C	.	.	.	.	.	.	.	.	.	.	.	.	.	.	.	c.755G>A	p.Gly252Glu	p.G252E	ENST00000338206	2/6	136	92	43	153	152	0	UGT2B15,missense_variant,p.Gly252Glu,ENST00000338206,;	T	ENSG00000196620
UGT2B15	0	.	GRCh37	4	69535850	69535850	+	Missense_Mutation	SNP	C	C	T	rs199566996	.	BLCA		TCGA-YC-A89H-01A-11D-A364-08	TCGA-YC-A89H-10A-01D-A362-08	C	C	.	.	.	.	.	.	.	.	.	.	.	.	.	.	.	c.487G>A	p.Glu163Lys	p.E163K	ENST00000338206	1/6	267	185	81	395	394	0	UGT2B15,missense_variant,p.Glu163Lys,ENST00000338206,;	T	ENSG00000196620
UGT2B15	0	.	GRCh37	4	69535849	69535849	+	Missense_Mutation	SNP	T	T	A	novel	.	BLCA		TCGA-ZF-A9RC-01A-11D-A38G-08	TCGA-ZF-A9RC-10A-01D-A38J-08	T	T	.	.	.	.	.	.	.	.	.	.	.	.	.	.	.	c.488A>T	p.Glu163Val	p.E163V	ENST00000338206	1/6	237	180	57	336	336	0	UGT2B15,missense_variant,p.Glu163Val,ENST00000338206,;	A	ENSG00000196620
UGT2B17	0	.	GRCh37	4	69403585	69403585	+	Missense_Mutation	SNP	G	G	C	.	.	BLCA		TCGA-2F-A9KP-01A-11D-A38G-08	TCGA-2F-A9KP-10A-01D-A38J-08	G	G	.	.	.	.	.	.	.	.	.	.	.	.	.	.	.	c.1351C>G	p.His451Asp	p.H451D	ENST00000317746	6/6	177	111	65	149	149	0	UGT2B17,missense_variant,p.His451Asp,ENST00000317746,;	C	ENSG00000197888
UGT2B17	0	.	GRCh37	4	69403579	69403579	+	Missense_Mutation	SNP	G	G	C	novel	.	BLCA		TCGA-4Z-AA7R-01A-11D-A391-08	TCGA-4Z-AA7R-10A-01D-A394-08	G	G	.	.	.	.	.	.	.	.	.	.	.	.	.	.	.	c.1357C>G	p.Gln453Glu	p.Q453E	ENST00000317746	6/6	142	87	54	210	210	0	UGT2B17,missense_variant,p.Gln453Glu,ENST00000317746,;	C	ENSG00000197888
UGT2B17	0	.	GRCh37	4	69426321	69426321	+	Missense_Mutation	SNP	C	C	T	novel	.	BLCA		TCGA-BT-A2LB-01A-11D-A18F-08	TCGA-BT-A2LB-11A-11D-A18F-08	C	C	.	.	.	.	.	.	.	.	.	.	.	.	.	.	.	c.939G>A	p.Met313Ile	p.M313I	ENST00000317746	3/6	109	81	27	151	150	0	UGT2B17,missense_variant,p.Met313Ile,ENST00000317746,;	T	ENSG00000197888
UGT2B17	0	.	GRCh37	4	69434194	69434194	+	Silent	SNP	C	C	T	novel	.	BLCA		TCGA-DK-A1AC-01A-11D-A13W-08	TCGA-DK-A1AC-10A-01D-A13W-08	C	C	.	.	.	.	.	.	.	.	.	.	.	.	.	.	.	c.9G>A	p.%3D	p.L3L	ENST00000317746	1/6	497	308	188	201	201	0	UGT2B17,synonymous_variant,p.%3D,ENST00000317746,;	T	ENSG00000197888
UGT2B17	0	.	GRCh37	4	69403562	69403562	+	Silent	SNP	C	C	T	novel	.	BLCA		TCGA-DK-A6B1-01A-12D-A30E-08	TCGA-DK-A6B1-10A-01D-A30H-08	C	C	.	.	.	.	.	.	.	.	.	.	.	.	.	.	.	c.1374G>A	p.%3D	p.L458L	ENST00000317746	6/6	221	121	100	197	197	0	UGT2B17,synonymous_variant,p.%3D,ENST00000317746,;	T	ENSG00000197888
UGT2B17	0	.	GRCh37	4	69433695	69433695	+	Missense_Mutation	SNP	G	G	C	novel	.	BLCA		TCGA-FD-A6TB-01A-12D-A339-08	TCGA-FD-A6TB-10A-21D-A339-08	G	G	.	.	.	.	.	.	.	.	.	.	.	.	.	.	.	c.508C>G	p.Leu170Val	p.L170V	ENST00000317746	1/6	423	402	21	261	261	0	UGT2B17,missense_variant,p.Leu170Val,ENST00000317746,;	C	ENSG00000197888
UGT2B17	0	.	GRCh37	4	69433695	69433695	+	Missense_Mutation	SNP	G	G	C	novel	.	BLCA		TCGA-FD-A6TC-01A-21D-A339-08	TCGA-FD-A6TC-10A-21D-A339-08	G	G	.	.	.	.	.	.	.	.	.	.	.	.	.	.	.	c.508C>G	p.Leu170Val	p.L170V	ENST00000317746	1/6	92	39	53	174	174	0	UGT2B17,missense_variant,p.Leu170Val,ENST00000317746,;	C	ENSG00000197888
UGT2B17	0	.	GRCh37	4	69431361	69431361	+	Missense_Mutation	SNP	G	G	A	novel	.	BLCA		TCGA-G2-AA3B-01A-11D-A391-08	TCGA-G2-AA3B-10A-01D-A394-08	G	G	.	.	.	.	.	.	.	.	.	.	.	.	.	.	.	c.802C>T	p.Pro268Ser	p.P268S	ENST00000317746	2/6	91	16	75	78	78	0	UGT2B17,missense_variant,p.Pro268Ser,ENST00000317746,;	A	ENSG00000197888
UGT2B17	0	.	GRCh37	4	69434021	69434021	+	Missense_Mutation	SNP	G	G	T	novel	.	BLCA		TCGA-ZF-AA4W-01A-12D-A38G-08	TCGA-ZF-AA4W-10A-01D-A38J-08	G	G	.	.	.	.	.	.	.	.	.	.	.	.	.	.	.	c.182C>A	p.Ser61Tyr	p.S61Y	ENST00000317746	1/6	308	262	46	412	412	0	UGT2B17,missense_variant,p.Ser61Tyr,ENST00000317746,;	T	ENSG00000197888
UGT2B28	0	.	GRCh37	4	70160324	70160324	+	Missense_Mutation	SNP	T	T	A	.	.	BLCA		TCGA-DK-A3IV-01A-22D-A21A-08	TCGA-DK-A3IV-10A-01D-A21A-08	T	T	.	.	.	.	.	.	.	.	.	.	.	.	.	.	.	c.1387T>A	p.Trp463Arg	p.W463R	ENST00000335568	6/6	131	91	40	36	36	0	UGT2B28,missense_variant,p.Trp463Arg,ENST00000335568,;UGT2B28,3_prime_UTR_variant,,ENST00000511240,;	A	ENSG00000135226
UGT2B28	0	.	GRCh37	4	70160649	70160649	+	3'UTR	SNP	C	C	G	novel	.	BLCA		TCGA-DK-A3WW-01A-22D-A23M-08	TCGA-DK-A3WW-10A-01D-A23K-08	C	C	.	.	.	.	.	.	.	.	.	.	.	.	.	.	.	c.*122C>G	.	.	ENST00000335568	6/6	16	13	3	15	15	0	UGT2B28,3_prime_UTR_variant,,ENST00000511240,;UGT2B28,3_prime_UTR_variant,,ENST00000335568,;	G	ENSG00000135226
UGT2B28	0	.	GRCh37	4	70146759	70146759	+	Missense_Mutation	SNP	G	G	A	.	.	BLCA		TCGA-DK-A3X1-01A-12D-A22Z-08	TCGA-DK-A3X1-10A-01D-A22Z-08	G	G	.	.	.	.	.	.	.	.	.	.	.	.	.	.	.	c.541G>A	p.Glu181Lys	p.E181K	ENST00000335568	1/6	80	32	48	64	64	0	UGT2B28,missense_variant,p.Glu181Lys,ENST00000511240,;UGT2B28,missense_variant,p.Glu181Lys,ENST00000335568,;	A	ENSG00000135226
UGT2B28	0	.	GRCh37	4	70155417	70155417	+	Missense_Mutation	SNP	C	C	T	rs770422617	.	BLCA		TCGA-DK-A6AW-01A-11D-A30E-08	TCGA-DK-A6AW-10A-01D-A30H-08	C	C	.	.	.	.	.	.	.	.	.	.	.	.	.	.	.	c.1037C>T	p.Ala346Val	p.A346V	ENST00000335568	4/6	156	143	13	171	171	0	UGT2B28,missense_variant,p.Ala346Val,ENST00000335568,;UGT2B28,intron_variant,,ENST00000511240,;	T	ENSG00000135226
UGT2B28	0	.	GRCh37	4	70146227	70146227	+	Silent	SNP	G	G	A	novel	.	BLCA		TCGA-E5-A4U1-01A-11D-A31L-08	TCGA-E5-A4U1-10B-01D-A31J-08	G	G	.	.	.	.	.	.	.	.	.	.	.	.	.	.	.	c.9G>A	p.%3D	p.L3L	ENST00000335568	1/6	396	259	137	264	264	0	UGT2B28,synonymous_variant,p.%3D,ENST00000511240,;UGT2B28,synonymous_variant,p.%3D,ENST00000335568,;	A	ENSG00000135226
UGT2B28	0	.	GRCh37	4	70146246	70146246	+	Missense_Mutation	SNP	C	C	G	.	.	BLCA		TCGA-FD-A6TC-01A-21D-A339-08	TCGA-FD-A6TC-10A-21D-A339-08	C	C	.	.	.	.	.	.	.	.	.	.	.	.	.	.	.	c.28C>G	p.Leu10Val	p.L10V	ENST00000335568	1/6	205	175	30	320	320	0	UGT2B28,missense_variant,p.Leu10Val,ENST00000511240,;UGT2B28,missense_variant,p.Leu10Val,ENST00000335568,;	G	ENSG00000135226
UGT2B28	0	.	GRCh37	4	70160521	70160521	+	Silent	SNP	A	A	G	novel	.	BLCA		TCGA-K4-A3WU-01B-11D-A23M-08	TCGA-K4-A3WU-10A-01D-A23K-08	A	A	.	.	.	.	.	.	.	.	.	.	.	.	.	.	.	c.1584A>G	p.%3D	p.R528R	ENST00000335568	6/6	100	88	12	54	54	0	UGT2B28,synonymous_variant,p.%3D,ENST00000335568,;UGT2B28,3_prime_UTR_variant,,ENST00000511240,;	G	ENSG00000135226
UGT2B28	0	.	GRCh37	4	70156432	70156432	+	Missense_Mutation	SNP	C	C	T	novel	.	BLCA		TCGA-XF-AAMG-01A-11D-A42E-08	TCGA-XF-AAMG-10A-01D-A42H-08	C	C	.	.	.	.	.	.	.	.	.	.	.	.	.	.	.	c.1213C>T	p.His405Tyr	p.H405Y	ENST00000335568	5/6	112	83	29	170	170	0	UGT2B28,missense_variant,p.His405Tyr,ENST00000335568,;UGT2B28,intron_variant,,ENST00000511240,;	T	ENSG00000135226
UGT2B4	0	.	GRCh37	4	70361469	70361469	+	Missense_Mutation	SNP	C	C	T	.	.	BLCA		TCGA-DK-A2I6-01A-12D-A18F-08	TCGA-DK-A2I6-10A-01D-A18F-08	C	C	.	.	.	.	.	.	.	.	.	.	.	.	.	.	.	c.111G>A	p.Met37Ile	p.M37I	ENST00000305107	1/6	115	77	38	92	92	0	UGT2B4,missense_variant,p.Met37Ile,ENST00000510114,;UGT2B4,missense_variant,p.Met37Ile,ENST00000305107,;UGT2B4,missense_variant,p.Met37Ile,ENST00000512583,;UGT2B4,intron_variant,,ENST00000381096,;UGT2B4,non_coding_transcript_exon_variant,,ENST00000506580,;UGT2B4,intron_variant,,ENST00000503836,;UGT2B4,intron_variant,,ENST00000502655,;	T	ENSG00000156096
UGT2B4	0	.	GRCh37	4	70346409	70346409	+	Silent	SNP	T	T	C	novel	.	BLCA		TCGA-DK-A6AW-01A-11D-A30E-08	TCGA-DK-A6AW-10A-01D-A30H-08	T	T	.	.	.	.	.	.	.	.	.	.	.	.	.	.	.	c.1530A>G	p.%3D	p.K510K	ENST00000305107	6/6	164	89	75	175	175	0	UGT2B4,synonymous_variant,p.%3D,ENST00000305107,;UGT2B4,synonymous_variant,p.%3D,ENST00000381096,;UGT2B4,3_prime_UTR_variant,,ENST00000512583,;AC108078.1,downstream_gene_variant,,ENST00000583573,;UGT2B4,non_coding_transcript_exon_variant,,ENST00000506580,;UGT2B4,downstream_gene_variant,,ENST00000502655,;	C	ENSG00000156096
UGT2B4	0	.	GRCh37	4	70359471	70359471	+	Silent	SNP	G	G	C	.	.	BLCA		TCGA-FD-A3SS-01A-12D-A22Z-08	TCGA-FD-A3SS-10A-01D-A22Z-08	G	G	.	.	.	.	.	.	.	.	.	.	.	.	.	.	.	c.810C>G	p.%3D	p.L270L	ENST00000305107	2/6	163	154	9	162	162	0	UGT2B4,synonymous_variant,p.%3D,ENST00000305107,;UGT2B4,synonymous_variant,p.%3D,ENST00000512583,;UGT2B4,synonymous_variant,p.%3D,ENST00000381096,;UGT2B4,downstream_gene_variant,,ENST00000510114,;UGT2B4,non_coding_transcript_exon_variant,,ENST00000506580,;UGT2B4,non_coding_transcript_exon_variant,,ENST00000503836,;UGT2B4,non_coding_transcript_exon_variant,,ENST00000502655,;	C	ENSG00000156096
UGT2B4	0	.	GRCh37	4	70355258	70355258	+	Missense_Mutation	SNP	C	C	T	.	.	BLCA		TCGA-G2-A3IB-01A-11D-A20D-08	TCGA-G2-A3IB-10A-01D-A20D-08	C	C	.	.	.	.	.	.	.	.	.	.	.	.	.	.	.	c.901G>A	p.Glu301Lys	p.E301K	ENST00000305107	3/6	101	21	80	148	148	0	UGT2B4,missense_variant,p.Glu301Lys,ENST00000305107,;UGT2B4,missense_variant,p.Glu301Lys,ENST00000512583,;UGT2B4,missense_variant,p.Glu165Lys,ENST00000381096,;UGT2B4,non_coding_transcript_exon_variant,,ENST00000506580,;UGT2B4,non_coding_transcript_exon_variant,,ENST00000503836,;UGT2B4,non_coding_transcript_exon_variant,,ENST00000502655,;	T	ENSG00000156096
UGT2B4	0	.	GRCh37	4	70346538	70346538	+	Silent	SNP	G	G	T	novel	.	BLCA		TCGA-KQ-A41N-01A-11D-A339-08	TCGA-KQ-A41N-10D-01D-A339-08	G	G	.	.	.	.	.	.	.	.	.	.	.	.	.	.	.	c.1401C>A	p.%3D	p.V467V	ENST00000305107	6/6	135	123	12	116	116	0	UGT2B4,synonymous_variant,p.%3D,ENST00000305107,;UGT2B4,synonymous_variant,p.%3D,ENST00000381096,;UGT2B4,3_prime_UTR_variant,,ENST00000512583,;AC108078.1,downstream_gene_variant,,ENST00000583573,;UGT2B4,non_coding_transcript_exon_variant,,ENST00000506580,;UGT2B4,downstream_gene_variant,,ENST00000502655,;	T	ENSG00000156096
UGT2B4	0	.	GRCh37	4	70355279	70355279	+	Missense_Mutation	SNP	C	C	G	.	.	BLCA		TCGA-SY-A9G5-01A-11D-A38G-08	TCGA-SY-A9G5-10A-01D-A38J-08	C	C	.	.	.	.	.	.	.	.	.	.	.	.	.	.	.	c.880G>C	p.Glu294Gln	p.E294Q	ENST00000305107	3/6	158	129	29	182	182	0	UGT2B4,missense_variant,p.Glu294Gln,ENST00000305107,;UGT2B4,missense_variant,p.Glu294Gln,ENST00000512583,;UGT2B4,missense_variant,p.Glu158Gln,ENST00000381096,;UGT2B4,non_coding_transcript_exon_variant,,ENST00000506580,;UGT2B4,non_coding_transcript_exon_variant,,ENST00000503836,;UGT2B4,non_coding_transcript_exon_variant,,ENST00000502655,;	G	ENSG00000156096
UGT2B4	0	.	GRCh37	4	70361310	70361310	+	Silent	SNP	G	G	A	novel	.	BLCA		TCGA-XF-A9T8-01A-11D-A391-08	TCGA-XF-A9T8-10A-01D-A394-08	G	G	.	.	.	.	.	.	.	.	.	.	.	.	.	.	.	c.270C>T	p.%3D	p.I90I	ENST00000305107	1/6	29	25	4	51	51	0	UGT2B4,synonymous_variant,p.%3D,ENST00000305107,;UGT2B4,synonymous_variant,p.%3D,ENST00000512583,;UGT2B4,intron_variant,,ENST00000381096,;UGT2B4,downstream_gene_variant,,ENST00000510114,;UGT2B4,non_coding_transcript_exon_variant,,ENST00000506580,;UGT2B4,intron_variant,,ENST00000503836,;UGT2B4,intron_variant,,ENST00000502655,;	A	ENSG00000156096
UGT2B4	0	.	GRCh37	4	70361046	70361046	+	Silent	SNP	G	G	A	rs370531105	.	BLCA		TCGA-ZF-A9R7-01A-11D-A38G-08	TCGA-ZF-A9R7-10A-01D-A38J-08	G	G	.	.	.	.	.	.	.	.	.	.	.	.	.	.	.	c.534C>T	p.%3D	p.Y178Y	ENST00000305107	1/6	72	64	8	78	78	0	UGT2B4,synonymous_variant,p.%3D,ENST00000305107,;UGT2B4,synonymous_variant,p.%3D,ENST00000512583,;UGT2B4,synonymous_variant,p.%3D,ENST00000381096,;UGT2B4,downstream_gene_variant,,ENST00000510114,;UGT2B4,non_coding_transcript_exon_variant,,ENST00000502655,;UGT2B4,intron_variant,,ENST00000506580,;UGT2B4,intron_variant,,ENST00000503836,;	A	ENSG00000156096
UGT2B7	0	.	GRCh37	4	69962754	69962754	+	Silent	SNP	C	C	T	.	.	BLCA		TCGA-BT-A2LB-01A-11D-A18F-08	TCGA-BT-A2LB-11A-11D-A18F-08	C	C	.	.	.	.	.	.	.	.	.	.	.	.	.	.	.	c.516C>T	p.%3D	p.L172L	ENST00000305231	1/6	87	67	19	144	143	0	UGT2B7,synonymous_variant,p.%3D,ENST00000305231,;UGT2B7,synonymous_variant,p.%3D,ENST00000508661,;UGT2B7,intron_variant,,ENST00000502942,;UGT2B7,intron_variant,,ENST00000509763,;	T	ENSG00000171234
UGT2B7	0	.	GRCh37	4	69962362	69962362	+	Missense_Mutation	SNP	A	A	G	rs569411321	.	BLCA		TCGA-CU-A0YR-01A-12D-A10S-08	TCGA-CU-A0YR-11A-13D-A10S-08	A	A	.	.	.	.	.	.	.	.	.	.	.	.	.	.	.	c.124A>G	p.Ile42Val	p.I42V	ENST00000305231	1/6	215	150	64	192	192	0	UGT2B7,missense_variant,p.Ile42Val,ENST00000305231,;UGT2B7,missense_variant,p.Ile42Val,ENST00000508661,;UGT2B7,intron_variant,,ENST00000502942,;UGT2B7,intron_variant,,ENST00000509763,;	G	ENSG00000171234
UGT2B7	0	.	GRCh37	4	69962531	69962531	+	Missense_Mutation	SNP	C	C	T	novel	.	BLCA		TCGA-KQ-A41R-01A-21D-A34U-08	TCGA-KQ-A41R-10G-01D-A34X-08	C	C	.	.	.	.	.	.	.	.	.	.	.	.	.	.	.	c.293C>T	p.Ser98Leu	p.S98L	ENST00000305231	1/6	95	69	25	50	50	0	UGT2B7,missense_variant,p.Ser98Leu,ENST00000305231,;UGT2B7,missense_variant,p.Ser98Leu,ENST00000508661,;UGT2B7,intron_variant,,ENST00000502942,;UGT2B7,intron_variant,,ENST00000509763,;	T	ENSG00000171234
UGT2B7	0	.	GRCh37	4	69978565	69978565	+	3'UTR	SNP	A	A	G	novel	.	BLCA		TCGA-XF-AAN2-01A-11D-A42E-08	TCGA-XF-AAN2-10A-01D-A42H-08	A	A	.	.	.	.	.	.	.	.	.	.	.	.	.	.	.	c.*111A>G	.	.	ENST00000305231	6/6	12	9	3	10	10	0	UGT2B7,3_prime_UTR_variant,,ENST00000305231,;UGT2B7,3_prime_UTR_variant,,ENST00000508661,;UGT2B7,downstream_gene_variant,,ENST00000502942,;UGT2B7,downstream_gene_variant,,ENST00000509763,;	G	ENSG00000171234
UGT3A1	0	.	GRCh37	5	35957445	35957445	+	Missense_Mutation	SNP	T	T	C	.	.	BLCA		TCGA-BT-A2LD-01A-12D-A20D-08	TCGA-BT-A2LD-10A-01D-A20D-08	T	T	.	.	.	.	.	.	.	.	.	.	.	.	.	.	.	c.920A>G	p.His307Arg	p.H307R	ENST00000274278	5/7	67	60	6	82	82	0	UGT3A1,missense_variant,p.His307Arg,ENST00000274278,;UGT3A1,missense_variant,p.His273Arg,ENST00000507113,;UGT3A1,missense_variant,p.His307Arg,ENST00000503189,;UGT3A1,downstream_gene_variant,,ENST00000333811,;UGT3A1,non_coding_transcript_exon_variant,,ENST00000513233,;UGT3A1,3_prime_UTR_variant,,ENST00000515801,;	C	ENSG00000145626
UGT3A1	0	.	GRCh37	5	35965895	35965895	+	Missense_Mutation	SNP	C	C	T	rs752166325	.	BLCA		TCGA-DK-A3IT-01A-31D-A20D-08	TCGA-DK-A3IT-10A-01D-A20D-08	C	C	.	.	.	.	.	.	.	.	.	.	.	.	.	.	.	c.436G>A	p.Ala146Thr	p.A146T	ENST00000274278	4/7	65	41	24	49	49	0	UGT3A1,missense_variant,p.Ala146Thr,ENST00000274278,;UGT3A1,missense_variant,p.Ala112Thr,ENST00000507113,;UGT3A1,missense_variant,p.Ala92Thr,ENST00000333811,;UGT3A1,missense_variant,p.Ala146Thr,ENST00000503189,;UGT3A1,intron_variant,,ENST00000513233,;UGT3A1,3_prime_UTR_variant,,ENST00000515801,;	T	ENSG00000145626
UGT3A1	0	.	GRCh37	5	35954498	35954498	+	Missense_Mutation	SNP	C	C	T	rs529749983	.	BLCA		TCGA-DK-A6AW-01A-11D-A30E-08	TCGA-DK-A6AW-10A-01D-A30H-08	C	C	.	.	.	.	.	.	.	.	.	.	.	.	.	.	.	c.1378G>A	p.Asp460Asn	p.D460N	ENST00000274278	7/7	55	21	34	58	58	0	UGT3A1,missense_variant,p.Asp460Asn,ENST00000274278,;UGT3A1,downstream_gene_variant,,ENST00000507113,;UGT3A1,downstream_gene_variant,,ENST00000503189,;UGT3A1,downstream_gene_variant,,ENST00000513233,;UGT3A1,3_prime_UTR_variant,,ENST00000515801,;	T	ENSG00000145626
UGT3A1	0	.	GRCh37	5	35988620	35988620	+	Missense_Mutation	SNP	G	G	C	novel	.	BLCA		TCGA-DK-AA74-01A-11D-A391-08	TCGA-DK-AA74-10A-01D-A394-08	G	G	.	.	.	.	.	.	.	.	.	.	.	.	.	.	.	c.128C>G	p.Ser43Cys	p.S43C	ENST00000274278	2/7	54	46	7	73	73	0	UGT3A1,missense_variant,p.Ser43Cys,ENST00000274278,;UGT3A1,missense_variant,p.Ser43Cys,ENST00000503189,;UGT3A1,5_prime_UTR_variant,,ENST00000333811,;UGT3A1,intron_variant,,ENST00000507113,;UGT3A1,intron_variant,,ENST00000513233,;UGT3A1,3_prime_UTR_variant,,ENST00000515801,;	C	ENSG00000145626
UGT3A1	0	.	GRCh37	5	35955898	35955898	+	Missense_Mutation	SNP	C	C	T	rs762872593	.	BLCA		TCGA-E7-A541-01A-11D-A26M-08	TCGA-E7-A541-10A-01D-A26K-08	C	C	.	.	.	.	.	.	.	.	.	.	.	.	.	.	.	c.1144G>A	p.Gly382Ser	p.G382S	ENST00000274278	6/7	144	113	30	59	59	0	UGT3A1,missense_variant,p.Gly382Ser,ENST00000274278,;UGT3A1,missense_variant,p.Gly348Ser,ENST00000507113,;UGT3A1,missense_variant,p.Gly382Ser,ENST00000503189,;UGT3A1,downstream_gene_variant,,ENST00000333811,;UGT3A1,non_coding_transcript_exon_variant,,ENST00000513233,;UGT3A1,3_prime_UTR_variant,,ENST00000515801,;	T	ENSG00000145626
UGT3A1	0	.	GRCh37	5	35955945	35955945	+	Missense_Mutation	SNP	A	A	G	novel	.	BLCA		TCGA-E7-A6ME-01A-22D-A32B-08	TCGA-E7-A6ME-10B-01D-A329-08	A	A	.	.	.	.	.	.	.	.	.	.	.	.	.	.	.	c.1097T>C	p.Phe366Ser	p.F366S	ENST00000274278	6/7	58	28	30	82	82	0	UGT3A1,missense_variant,p.Phe366Ser,ENST00000274278,;UGT3A1,missense_variant,p.Phe332Ser,ENST00000507113,;UGT3A1,missense_variant,p.Phe366Ser,ENST00000503189,;UGT3A1,downstream_gene_variant,,ENST00000333811,;UGT3A1,non_coding_transcript_exon_variant,,ENST00000513233,;UGT3A1,3_prime_UTR_variant,,ENST00000515801,;	G	ENSG00000145626
UGT3A1	0	.	GRCh37	5	35957426	35957426	+	Silent	SNP	G	G	C	.	.	BLCA		TCGA-FD-A3SO-01A-11D-A22Z-08	TCGA-FD-A3SO-10A-01D-A22Z-08	G	G	.	.	.	.	.	.	.	.	.	.	.	.	.	.	.	c.939C>G	p.%3D	p.L313L	ENST00000274278	5/7	94	88	6	64	64	0	UGT3A1,synonymous_variant,p.%3D,ENST00000274278,;UGT3A1,synonymous_variant,p.%3D,ENST00000507113,;UGT3A1,synonymous_variant,p.%3D,ENST00000503189,;UGT3A1,downstream_gene_variant,,ENST00000333811,;UGT3A1,non_coding_transcript_exon_variant,,ENST00000513233,;UGT3A1,3_prime_UTR_variant,,ENST00000515801,;	C	ENSG00000145626
UGT3A1	0	.	GRCh37	5	35954391	35954391	+	Silent	SNP	G	G	A	rs377507437	.	BLCA		TCGA-G2-A2EJ-01A-11D-A17V-08	TCGA-G2-A2EJ-10A-01D-A17V-08	G	G	.	.	.	.	.	.	.	.	.	.	.	.	.	.	.	c.1485C>T	p.%3D	p.L495L	ENST00000274278	7/7	33	27	5	46	46	0	UGT3A1,synonymous_variant,p.%3D,ENST00000274278,;UGT3A1,downstream_gene_variant,,ENST00000507113,;UGT3A1,downstream_gene_variant,,ENST00000503189,;UGT3A1,downstream_gene_variant,,ENST00000513233,;UGT3A1,3_prime_UTR_variant,,ENST00000515801,;	A	ENSG00000145626
UGT3A1	0	.	GRCh37	5	35991299	35991299	+	Missense_Mutation	SNP	G	G	C	rs141973992	.	BLCA		TCGA-LT-A5Z6-01A-11D-A289-08	TCGA-LT-A5Z6-10A-01D-A289-08	G	G	.	.	.	.	.	.	.	.	.	.	.	.	.	.	.	c.44C>G	p.Ser15Cys	p.S15C	ENST00000274278	1/7	173	122	51	173	173	0	UGT3A1,missense_variant,p.Ser15Cys,ENST00000274278,;UGT3A1,missense_variant,p.Ser15Cys,ENST00000507113,;UGT3A1,missense_variant,p.Ser15Cys,ENST00000503189,;UGT3A1,intron_variant,,ENST00000333811,;UGT3A1,non_coding_transcript_exon_variant,,ENST00000513233,;UGT3A1,missense_variant,p.Ser15Cys,ENST00000515801,;	C	ENSG00000145626
UGT3A2	0	.	GRCh37	5	36035978	36035978	+	Missense_Mutation	SNP	G	G	C	novel	.	BLCA		TCGA-2F-A9KQ-01A-11D-A38G-08	TCGA-2F-A9KQ-11A-11D-A38J-08	G	G	.	.	.	.	.	.	.	.	.	.	.	.	.	.	.	c.1394C>G	p.Thr465Arg	p.T465R	ENST00000282507	7/7	31	21	10	42	42	0	UGT3A2,missense_variant,p.Thr431Arg,ENST00000513300,;UGT3A2,missense_variant,p.Thr163Arg,ENST00000545528,;UGT3A2,missense_variant,p.Thr465Arg,ENST00000282507,;UGT3A2,downstream_gene_variant,,ENST00000504954,;UGT3A2,3_prime_UTR_variant,,ENST00000504685,;	C	ENSG00000168671
UGT3A2	0	.	GRCh37	5	36035959	36035959	+	Silent	SNP	G	G	A	.	.	BLCA		TCGA-DK-A2I4-01A-11D-A21A-08	TCGA-DK-A2I4-10A-01D-A21A-08	G	G	.	.	.	.	.	.	.	.	.	.	.	.	.	.	.	c.1413C>T	p.%3D	p.L471L	ENST00000282507	7/7	75	59	16	36	36	0	UGT3A2,synonymous_variant,p.%3D,ENST00000513300,;UGT3A2,synonymous_variant,p.%3D,ENST00000545528,;UGT3A2,synonymous_variant,p.%3D,ENST00000282507,;UGT3A2,downstream_gene_variant,,ENST00000504954,;UGT3A2,3_prime_UTR_variant,,ENST00000504685,;	A	ENSG00000168671
UGT3A2	0	.	GRCh37	5	36049133	36049133	+	Missense_Mutation	SNP	C	C	G	.	.	BLCA		TCGA-DK-A3IQ-01A-31D-A20D-08	TCGA-DK-A3IQ-10A-01D-A20D-08	C	C	.	.	.	.	.	.	.	.	.	.	.	.	.	.	.	c.701G>C	p.Arg234Thr	p.R234T	ENST00000282507	4/7	123	98	24	71	71	0	UGT3A2,missense_variant,p.Arg200Thr,ENST00000513300,;UGT3A2,missense_variant,p.Arg234Thr,ENST00000282507,;UGT3A2,intron_variant,,ENST00000545528,;UGT3A2,downstream_gene_variant,,ENST00000515131,;UGT3A2,intron_variant,,ENST00000504954,;UGT3A2,intron_variant,,ENST00000504685,;	G	ENSG00000168671
UGT3A2	0	.	GRCh37	5	36049523	36049523	+	Splice_Site	SNP	C	C	T	.	.	BLCA		TCGA-DK-A3IQ-01A-31D-A20D-08	TCGA-DK-A3IQ-10A-01D-A20D-08	C	C	.	.	.	.	.	.	.	.	.	.	.	.	.	.	.	c.312-1G>A	.	p.X104_splice	ENST00000282507	.	29	24	5	14	14	0	UGT3A2,splice_acceptor_variant,,ENST00000513300,;UGT3A2,splice_acceptor_variant,,ENST00000515131,;UGT3A2,splice_acceptor_variant,,ENST00000282507,;UGT3A2,intron_variant,,ENST00000545528,;UGT3A2,intron_variant,,ENST00000504954,;UGT3A2,intron_variant,,ENST00000504685,;	T	ENSG00000168671
UGT3A2	0	.	GRCh37	5	36038078	36038078	+	Silent	SNP	C	C	T	novel	.	BLCA		TCGA-E7-A7DV-01A-11D-A339-08	TCGA-E7-A7DV-10A-01D-A339-08	C	C	.	.	.	.	.	.	.	.	.	.	.	.	.	.	.	c.1116G>A	p.%3D	p.Q372Q	ENST00000282507	6/7	83	59	24	85	85	0	UGT3A2,synonymous_variant,p.%3D,ENST00000513300,;UGT3A2,synonymous_variant,p.%3D,ENST00000545528,;UGT3A2,synonymous_variant,p.%3D,ENST00000282507,;UGT3A2,downstream_gene_variant,,ENST00000504954,;UGT3A2,3_prime_UTR_variant,,ENST00000504685,;	T	ENSG00000168671
UGT3A2	0	.	GRCh37	5	36049520	36049520	+	Missense_Mutation	SNP	C	C	G	.	.	BLCA		TCGA-E7-A7XN-01A-11D-A34U-08	TCGA-E7-A7XN-10A-01D-A34X-08	C	C	.	.	.	.	.	.	.	.	.	.	.	.	.	.	.	c.314G>C	p.Gly105Ala	p.G105A	ENST00000282507	4/7	75	67	7	69	69	0	UGT3A2,missense_variant,p.Gly71Ala,ENST00000513300,;UGT3A2,missense_variant,p.Gly105Ala,ENST00000515131,;UGT3A2,missense_variant,p.Gly105Ala,ENST00000282507,;UGT3A2,intron_variant,,ENST00000545528,;UGT3A2,intron_variant,,ENST00000504954,;UGT3A2,intron_variant,,ENST00000504685,;	G	ENSG00000168671
UGT3A2	0	.	GRCh37	5	36035780	36035780	+	3'UTR	SNP	C	C	T	novel	.	BLCA		TCGA-FD-A43P-01A-31D-A23U-08	TCGA-FD-A43P-10A-01D-A23U-08	C	C	.	.	.	.	.	.	.	.	.	.	.	.	.	.	.	c.*20G>A	.	.	ENST00000282507	7/7	26	18	8	38	38	0	UGT3A2,3_prime_UTR_variant,,ENST00000513300,;UGT3A2,3_prime_UTR_variant,,ENST00000545528,;UGT3A2,3_prime_UTR_variant,,ENST00000282507,;UGT3A2,downstream_gene_variant,,ENST00000504954,;UGT3A2,3_prime_UTR_variant,,ENST00000504685,;	T	ENSG00000168671
UGT3A2	0	.	GRCh37	5	36049368	36049368	+	Missense_Mutation	SNP	C	C	T	novel	.	BLCA		TCGA-GU-AATO-01A-11D-A391-08	TCGA-GU-AATO-10A-01D-A394-08	C	C	.	.	.	.	.	.	.	.	.	.	.	.	.	.	.	c.466G>A	p.Glu156Lys	p.E156K	ENST00000282507	4/7	71	56	14	61	61	0	UGT3A2,missense_variant,p.Glu122Lys,ENST00000513300,;UGT3A2,missense_variant,p.Glu156Lys,ENST00000282507,;UGT3A2,intron_variant,,ENST00000545528,;UGT3A2,downstream_gene_variant,,ENST00000515131,;UGT3A2,intron_variant,,ENST00000504954,;UGT3A2,intron_variant,,ENST00000504685,;	T	ENSG00000168671
UGT3A2	0	.	GRCh37	5	36066905	36066905	+	5'UTR	SNP	G	G	A	novel	.	BLCA		TCGA-UY-A78O-01A-12D-A339-08	TCGA-UY-A78O-10A-01D-A339-08	G	G	.	.	.	.	.	.	.	.	.	.	.	.	.	.	.	c.-14C>T	.	.	ENST00000282507	1/7	112	92	20	99	99	0	UGT3A2,5_prime_UTR_variant,,ENST00000513300,;UGT3A2,5_prime_UTR_variant,,ENST00000545528,;UGT3A2,5_prime_UTR_variant,,ENST00000515131,;UGT3A2,5_prime_UTR_variant,,ENST00000282507,;UGT3A2,intron_variant,,ENST00000504954,;UGT3A2,5_prime_UTR_variant,,ENST00000504685,;CTD-2197M16.1,downstream_gene_variant,,ENST00000505367,;	A	ENSG00000168671
UGT3A2	0	.	GRCh37	5	36066806	36066806	+	Missense_Mutation	SNP	G	G	C	novel	.	BLCA		TCGA-XF-A8HD-01A-11D-A364-08	TCGA-XF-A8HD-10A-01D-A362-08	G	G	.	.	.	.	.	.	.	.	.	.	.	.	.	.	.	c.86C>G	p.Ser29Cys	p.S29C	ENST00000282507	1/7	189	151	37	177	177	0	UGT3A2,missense_variant,p.Ser29Cys,ENST00000513300,;UGT3A2,missense_variant,p.Ser29Cys,ENST00000515131,;UGT3A2,missense_variant,p.Ser29Cys,ENST00000282507,;UGT3A2,5_prime_UTR_variant,,ENST00000545528,;UGT3A2,intron_variant,,ENST00000504954,;UGT3A2,missense_variant,p.Ser29Cys,ENST00000504685,;	C	ENSG00000168671
UGT3A2	0	.	GRCh37	5	36035883	36035883	+	Missense_Mutation	SNP	G	G	T	novel	.	BLCA		TCGA-ZF-A9RL-01A-11D-A38G-08	TCGA-ZF-A9RL-10A-01D-A38J-08	G	G	.	.	.	.	.	.	.	.	.	.	.	.	.	.	.	c.1489C>A	p.Leu497Met	p.L497M	ENST00000282507	7/7	45	17	27	36	36	0	UGT3A2,missense_variant,p.Leu463Met,ENST00000513300,;UGT3A2,missense_variant,p.Leu195Met,ENST00000545528,;UGT3A2,missense_variant,p.Leu497Met,ENST00000282507,;UGT3A2,downstream_gene_variant,,ENST00000504954,;UGT3A2,3_prime_UTR_variant,,ENST00000504685,;	T	ENSG00000168671
UGT3A2	0	.	GRCh37	5	36049257	36049257	+	Missense_Mutation	SNP	C	C	G	novel	.	BLCA		TCGA-ZF-A9RN-01A-11D-A42E-08	TCGA-ZF-A9RN-10A-01D-A42H-08	C	C	.	.	.	.	.	.	.	.	.	.	.	.	.	.	.	c.577G>C	p.Asp193His	p.D193H	ENST00000282507	4/7	68	54	14	70	70	0	UGT3A2,missense_variant,p.Asp159His,ENST00000513300,;UGT3A2,missense_variant,p.Asp193His,ENST00000282507,;UGT3A2,intron_variant,,ENST00000545528,;UGT3A2,downstream_gene_variant,,ENST00000515131,;UGT3A2,intron_variant,,ENST00000504954,;UGT3A2,intron_variant,,ENST00000504685,;	G	ENSG00000168671
UGT8	0	.	GRCh37	4	115544702	115544702	+	Silent	SNP	C	C	T	novel	.	BLCA		TCGA-2F-A9KO-01A-11D-A38G-08	TCGA-2F-A9KO-11A-12D-A38J-08	C	C	.	.	.	.	.	.	.	.	.	.	.	.	.	.	.	c.666C>T	p.%3D	p.Y222Y	ENST00000310836	2/6	74	59	14	82	81	1	UGT8,synonymous_variant,p.%3D,ENST00000310836,;UGT8,synonymous_variant,p.%3D,ENST00000394511,;UGT8,downstream_gene_variant,,ENST00000507710,;	T	ENSG00000174607
UGT8	0	.	GRCh37	4	115544835	115544835	+	Missense_Mutation	SNP	A	A	C	novel	.	BLCA		TCGA-DK-A6AW-01A-11D-A30E-08	TCGA-DK-A6AW-10A-01D-A30H-08	A	A	.	.	.	.	.	.	.	.	.	.	.	.	.	.	.	c.799A>C	p.Lys267Gln	p.K267Q	ENST00000310836	2/6	70	42	28	85	85	0	UGT8,missense_variant,p.Lys267Gln,ENST00000310836,;UGT8,missense_variant,p.Lys267Gln,ENST00000394511,;UGT8,downstream_gene_variant,,ENST00000507710,;	C	ENSG00000174607
UGT8	0	.	GRCh37	4	115544433	115544433	+	Missense_Mutation	SNP	G	G	T	novel	.	BLCA		TCGA-DK-AA6U-01A-11D-A391-08	TCGA-DK-AA6U-10A-01D-A394-08	G	G	.	.	.	.	.	.	.	.	.	.	.	.	.	.	.	c.397G>T	p.Asp133Tyr	p.D133Y	ENST00000310836	2/6	136	86	50	147	147	0	UGT8,missense_variant,p.Asp133Tyr,ENST00000507710,;UGT8,missense_variant,p.Asp133Tyr,ENST00000310836,;UGT8,missense_variant,p.Asp133Tyr,ENST00000394511,;	T	ENSG00000174607
UGT8	0	.	GRCh37	4	115544466	115544466	+	Missense_Mutation	SNP	G	G	A	.	.	BLCA		TCGA-FD-A3SR-01A-11D-A22Z-08	TCGA-FD-A3SR-10A-01D-A22Z-08	G	G	.	.	.	.	.	.	.	.	.	.	.	.	.	.	.	c.430G>A	p.Gly144Arg	p.G144R	ENST00000310836	2/6	153	102	50	105	105	0	UGT8,missense_variant,p.Gly144Arg,ENST00000310836,;UGT8,missense_variant,p.Gly144Arg,ENST00000394511,;UGT8,downstream_gene_variant,,ENST00000507710,;	A	ENSG00000174607
UGT8	0	.	GRCh37	4	115589294	115589294	+	Missense_Mutation	SNP	G	G	A	novel	.	BLCA		TCGA-G2-AA3B-01A-11D-A391-08	TCGA-G2-AA3B-10A-01D-A394-08	G	G	.	.	.	.	.	.	.	.	.	.	.	.	.	.	.	c.1096G>A	p.Glu366Lys	p.E366K	ENST00000310836	5/6	87	74	12	99	99	0	UGT8,missense_variant,p.Glu366Lys,ENST00000310836,;UGT8,missense_variant,p.Glu366Lys,ENST00000394511,;	A	ENSG00000174607
UGT8	0	.	GRCh37	4	115589295	115589295	+	Missense_Mutation	SNP	A	A	G	novel	.	BLCA		TCGA-YF-AA3L-01A-11D-A38G-08	TCGA-YF-AA3L-10A-01D-A38J-08	A	A	.	.	.	.	.	.	.	.	.	.	.	.	.	.	.	c.1097A>G	p.Glu366Gly	p.E366G	ENST00000310836	5/6	192	128	63	89	89	0	UGT8,missense_variant,p.Glu366Gly,ENST00000310836,;UGT8,missense_variant,p.Glu366Gly,ENST00000394511,;	G	ENSG00000174607
UGT8	0	.	GRCh37	4	115597250	115597250	+	Missense_Mutation	SNP	G	G	T	rs77695673	.	LIHC		TCGA-C4-A0F7-01A-11D-A10S-08	TCGA-C4-A0F7-10A-01D-A10S-08	G	G	.	.	.	.	.	.	.	.	.	.	.	.	.	.	.	c.1432G>T	p.Ala478Ser	p.A478S	ENST00000310836	6/6	139	87	52	175	175	0	UGT8,missense_variant,p.Ala478Ser,ENST00000310836,;UGT8,missense_variant,p.Ala478Ser,ENST00000394511,;	T	ENSG00000174607
[truncated: 66 more columns]

## Sheet: BRCA
Hugo_Symbol	Entrez_Gene_Id	Center	NCBI_Build	Chromosome	Start_Position	End_Position	Strand	Variant_Classification	Variant_Type	Reference_Allele	Tumor_Seq_Allele1	Tumor_Seq_Allele2	dbSNP_RS	dbSNP_Val_Status	TCGA Cancer type		Tumor_Sample_Barcode	Matched_Norm_Sample_Barcode	Match_Norm_Seq_Allele1	Match_Norm_Seq_Allele2	Tumor_Validation_Allele1	Tumor_Validation_Allele2	Match_Norm_Validation_Allele1	Match_Norm_Validation_Allele2	Verification_Status	Validation_Status	Mutation_Status	Sequencing_Phase	Sequence_Source	Validation_Method	Score	BAM_File	Sequencer	Tumor_Sample_UUID	Matched_Norm_Sample_UUID	HGVSc	HGVSp	HGVSp_Short	Transcript_ID	Exon_Number	t_depth	t_ref_count	t_alt_count	n_depth	n_ref_count	n_alt_count	all_effects	Allele	Gene
UGT1A10	0	.	GRCh37	2	234676964	234676964	+	Missense_Mutation	SNP	G	G	T	.	.	BRCA		TCGA-A7-A13D-01A-13D-A272-09	TCGA-A7-A13D-10A-02D-A272-09	G	G	.	.	.	.	.	.	.	.	.	.	.	.	.	.	.	c.1174G>T	p.Gly392Cys	p.G392C	ENST00000344644	4/5	48	44	4	92	92	0	UGT1A10,missense_variant,p.Gly392Cys,ENST00000373445,;UGT1A4,missense_variant,p.Gly396Cys,ENST00000373409,;UGT1A6,missense_variant,p.Gly394Cys,ENST00000305139,;UGT1A3,missense_variant,p.Gly396Cys,ENST00000482026,;UGT1A6,missense_variant,p.Gly127Cys,ENST00000373424,;UGT1A8,missense_variant,p.Gly395Cys,ENST00000608383,;UGT1A8,missense_variant,p.Gly396Cys,ENST00000608381,;UGT1A7,missense_variant,p.G…	T	ENSG00000242515
UGT1A10	0	.	GRCh37	2	234676965	234676965	+	Missense_Mutation	SNP	G	G	T	rs367897068	.	BRCA		TCGA-A7-A13D-01A-13D-A272-09	TCGA-A7-A13D-10A-02D-A272-09	G	G	.	.	.	.	.	.	.	.	.	.	.	.	.	.	.	c.1175G>T	p.Gly392Val	p.G392V	ENST00000344644	4/5	48	44	4	92	92	0	UGT1A10,missense_variant,p.Gly392Val,ENST00000373445,;UGT1A4,missense_variant,p.Gly396Val,ENST00000373409,;UGT1A6,missense_variant,p.Gly394Val,ENST00000305139,;UGT1A3,missense_variant,p.Gly396Val,ENST00000482026,;UGT1A6,missense_variant,p.Gly127Val,ENST00000373424,;UGT1A8,missense_variant,p.Gly395Val,ENST00000608383,;UGT1A8,missense_variant,p.Gly396Val,ENST00000608381,;UGT1A7,missense_variant,p.G…	T	ENSG00000242515
UGT1A10	0	.	GRCh37	2	234676536	234676536	+	Silent	SNP	G	G	A	rs770433443	.	BRCA		TCGA-AN-A046-01A-21W-A050-09	TCGA-AN-A046-10A-01W-A055-09	G	G	.	.	.	.	.	.	.	.	.	.	.	.	.	.	.	c.1029G>A	p.%3D	p.A343A	ENST00000344644	3/5	282	246	36	410	410	0	UGT1A10,synonymous_variant,p.%3D,ENST00000373445,;UGT1A4,synonymous_variant,p.%3D,ENST00000373409,;UGT1A6,synonymous_variant,p.%3D,ENST00000305139,;UGT1A3,synonymous_variant,p.%3D,ENST00000482026,;UGT1A6,synonymous_variant,p.%3D,ENST00000373424,;UGT1A8,synonymous_variant,p.%3D,ENST00000608383,;UGT1A8,synonymous_variant,p.%3D,ENST00000608381,;UGT1A7,synonymous_variant,p.%3D,ENST00000373426,;UGT1A8…	A	ENSG00000242515
UGT1A10	0	.	GRCh37	2	234545725	234545725	+	Missense_Mutation	SNP	C	C	T	.	.	BRCA		TCGA-AR-A1AH-01A-11D-A12B-09	TCGA-AR-A1AH-10A-01D-A12B-09	C	C	.	.	.	.	.	.	.	.	.	.	.	.	.	.	.	c.557C>T	p.Pro186Leu	p.P186L	ENST00000344644	1/5	533	310	223	478	478	0	UGT1A10,missense_variant,p.Pro186Leu,ENST00000373445,;UGT1A10,missense_variant,p.Pro186Leu,ENST00000344644,;UGT1A8,intron_variant,,ENST00000373450,;	T	ENSG00000242515
UGT1A10	0	.	GRCh37	2	234545168	234545168	+	5'UTR	SNP	C	C	T	novel	.	BRCA		TCGA-B6-A0IK-01A-12W-A071-09	TCGA-B6-A0IK-10A-01W-A071-09	C	C	.	.	.	.	.	.	.	.	.	.	.	.	.	.	.	c.-1C>T	.	.	ENST00000344644	1/5	146	110	36	117	117	0	UGT1A10,5_prime_UTR_variant,,ENST00000373445,;UGT1A10,5_prime_UTR_variant,,ENST00000344644,;UGT1A8,intron_variant,,ENST00000373450,;	T	ENSG00000242515
UGT1A10	0	.	GRCh37	2	234545248	234545248	+	Missense_Mutation	SNP	A	A	T	.	.	BRCA		TCGA-C8-A27A-01A-11D-A167-09	TCGA-C8-A27A-10B-01D-A167-09	A	A	.	.	.	.	.	.	.	.	.	.	.	.	.	.	.	c.80A>T	p.Lys27Met	p.K27M	ENST00000344644	1/5	85	71	13	69	69	0	UGT1A10,missense_variant,p.Lys27Met,ENST00000373445,;UGT1A10,missense_variant,p.Lys27Met,ENST00000344644,;UGT1A8,intron_variant,,ENST00000373450,;	T	ENSG00000242515
UGT1A3	0	.	GRCh37	2	234638355	234638355	+	Missense_Mutation	SNP	C	C	T	.	.	BRCA		TCGA-A2-A04T-01A-21W-A050-09	TCGA-A2-A04T-10A-01W-A055-09	C	C	.	.	.	.	.	.	.	.	.	.	.	.	.	.	.	c.583C>T	p.Pro195Ser	p.P195S	ENST00000482026	1/5	479	348	131	268	268	0	UGT1A3,missense_variant,p.Pro195Ser,ENST00000482026,;UGT1A8,missense_variant,p.Pro195Ser,ENST00000609767,;UGT1A10,intron_variant,,ENST00000373445,;UGT1A4,intron_variant,,ENST00000373409,;UGT1A6,intron_variant,,ENST00000305139,;UGT1A6,intron_variant,,ENST00000373424,;UGT1A8,intron_variant,,ENST00000608381,;UGT1A7,intron_variant,,ENST00000373426,;UGT1A8,intron_variant,,ENST00000609637,;UGT1A5,intro…	T	ENSG00000243135
UGT1A3	0	.	GRCh37	2	234638270	234638270	+	Silent	SNP	G	G	A	rs563451648	.	BRCA		TCGA-AN-A046-01A-21W-A050-09	TCGA-AN-A046-10A-01W-A055-09	G	G	.	.	.	.	.	.	.	.	.	.	.	.	.	.	.	c.498G>A	p.%3D	p.S166S	ENST00000482026	1/5	311	225	85	381	381	0	UGT1A3,synonymous_variant,p.%3D,ENST00000482026,;UGT1A8,synonymous_variant,p.%3D,ENST00000609767,;UGT1A10,intron_variant,,ENST00000373445,;UGT1A4,intron_variant,,ENST00000373409,;UGT1A6,intron_variant,,ENST00000305139,;UGT1A6,intron_variant,,ENST00000373424,;UGT1A8,intron_variant,,ENST00000608381,;UGT1A7,intron_variant,,ENST00000373426,;UGT1A8,intron_variant,,ENST00000609637,;UGT1A5,intron_varian…	A	ENSG00000243135
UGT1A3	0	.	GRCh37	2	234638190	234638190	+	Missense_Mutation	SNP	C	C	A	.	.	BRCA		TCGA-AN-A0FL-01A-11W-A050-09	TCGA-AN-A0FL-10A-01W-A055-09	C	C	.	.	.	.	.	.	.	.	.	.	.	.	.	.	.	c.418C>A	p.His140Asn	p.H140N	ENST00000482026	1/5	265	14	250	297	297	0	UGT1A3,missense_variant,p.His140Asn,ENST00000482026,;UGT1A8,missense_variant,p.His140Asn,ENST00000609767,;UGT1A10,intron_variant,,ENST00000373445,;UGT1A4,intron_variant,,ENST00000373409,;UGT1A6,intron_variant,,ENST00000305139,;UGT1A6,intron_variant,,ENST00000373424,;UGT1A8,intron_variant,,ENST00000608381,;UGT1A7,intron_variant,,ENST00000373426,;UGT1A8,intron_variant,,ENST00000609637,;UGT1A5,intro…	A	ENSG00000243135
UGT1A3	0	.	GRCh37	2	234638186	234638186	+	Silent	SNP	C	C	T	.	.	BRCA		TCGA-AO-A0J4-01A-11W-A050-09	TCGA-AO-A0J4-10A-01W-A055-09	C	C	.	.	.	.	.	.	.	.	.	.	.	.	.	.	.	c.414C>T	p.%3D	p.I138I	ENST00000482026	1/5	304	199	105	293	293	0	UGT1A3,synonymous_variant,p.%3D,ENST00000482026,;UGT1A8,synonymous_variant,p.%3D,ENST00000609767,;UGT1A10,intron_variant,,ENST00000373445,;UGT1A4,intron_variant,,ENST00000373409,;UGT1A6,intron_variant,,ENST00000305139,;UGT1A6,intron_variant,,ENST00000373424,;UGT1A8,intron_variant,,ENST00000608381,;UGT1A7,intron_variant,,ENST00000373426,;UGT1A8,intron_variant,,ENST00000609637,;UGT1A5,intron_varian…	T	ENSG00000243135
UGT1A4	0	.	GRCh37	2	234681046	234681046	+	Silent	SNP	C	C	T	.	.	BRCA		TCGA-A2-A0CR-01A-11D-A228-09	TCGA-A2-A0CR-10A-01D-A22A-09	C	C	.	.	.	.	.	.	.	.	.	.	.	.	.	.	.	c.1446C>T	p.%3D	p.L482L	ENST00000373409	5/5	37	31	5	39	39	0	UGT1A4,synonymous_variant,p.%3D,ENST00000373409,;UGT1A6,synonymous_variant,p.%3D,ENST00000305139,;UGT1A3,synonymous_variant,p.%3D,ENST00000482026,;UGT1A6,synonymous_variant,p.%3D,ENST00000373424,;UGT1A8,synonymous_variant,p.%3D,ENST00000608383,;UGT1A8,synonymous_variant,p.%3D,ENST00000608381,;UGT1A7,synonymous_variant,p.%3D,ENST00000373426,;UGT1A8,synonymous_variant,p.%3D,ENST00000609637,;UGT1A8,…	T	ENSG00000244474
UGT1A4	0	.	GRCh37	2	234627740	234627740	+	Missense_Mutation	SNP	G	G	A	rs376370143	.	BRCA		TCGA-A2-A0CX-01A-21W-A019-09	TCGA-A2-A0CX-10A-01W-A021-09	G	G	.	.	.	.	.	.	.	.	.	.	.	.	.	.	.	c.274G>A	p.Val92Ile	p.V92I	ENST00000373409	1/5	168	131	36	179	179	0	UGT1A4,missense_variant,p.Val92Ile,ENST00000373409,;UGT1A10,intron_variant,,ENST00000373445,;UGT1A6,intron_variant,,ENST00000305139,;UGT1A6,intron_variant,,ENST00000373424,;UGT1A8,intron_variant,,ENST00000608381,;UGT1A7,intron_variant,,ENST00000373426,;UGT1A8,intron_variant,,ENST00000609637,;UGT1A5,intron_variant,,ENST00000373414,;UGT1A6,intron_variant,,ENST00000406651,;UGT1A10,intron_variant,,EN…	A	ENSG00000244474
UGT1A4	0	.	GRCh37	2	234681067	234681067	+	Silent	SNP	C	C	A	.	.	BRCA		TCGA-A8-A09Z-01A-11W-A019-09	TCGA-A8-A09Z-10A-01W-A021-09	C	C	.	.	.	.	.	.	.	.	.	.	.	.	.	.	.	c.1467C>A	p.%3D	p.S489S	ENST00000373409	5/5	137	84	53	124	124	0	UGT1A4,synonymous_variant,p.%3D,ENST00000373409,;UGT1A6,synonymous_variant,p.%3D,ENST00000305139,;UGT1A3,synonymous_variant,p.%3D,ENST00000482026,;UGT1A6,synonymous_variant,p.%3D,ENST00000373424,;UGT1A8,synonymous_variant,p.%3D,ENST00000608383,;UGT1A8,synonymous_variant,p.%3D,ENST00000608381,;UGT1A7,synonymous_variant,p.%3D,ENST00000373426,;UGT1A8,synonymous_variant,p.%3D,ENST00000609637,;UGT1A8,…	A	ENSG00000244474
UGT1A4	0	.	GRCh37	2	234681283	234681283	+	3'UTR	SNP	A	A	C	novel	.	BRCA		TCGA-AN-A046-01A-21W-A050-09	TCGA-AN-A046-10A-01W-A055-09	A	A	.	.	.	.	.	.	.	.	.	.	.	.	.	.	.	c.*78A>C	.	.	ENST00000373409	5/5	37	26	11	47	47	0	UGT1A4,3_prime_UTR_variant,,ENST00000373409,;UGT1A6,3_prime_UTR_variant,,ENST00000305139,;UGT1A3,3_prime_UTR_variant,,ENST00000482026,;UGT1A6,3_prime_UTR_variant,,ENST00000373424,;UGT1A8,3_prime_UTR_variant,,ENST00000608381,;UGT1A7,3_prime_UTR_variant,,ENST00000373426,;UGT1A8,3_prime_UTR_variant,,ENST00000609637,;UGT1A8,3_prime_UTR_variant,,ENST00000609767,;UGT1A5,3_prime_UTR_variant,,ENST0000037…	C	ENSG00000244474
UGT1A4	0	.	GRCh37	2	234627956	234627956	+	Missense_Mutation	SNP	T	T	C	.	.	BRCA		TCGA-AR-A256-01A-11D-A167-09	TCGA-AR-A256-10A-01D-A167-09	T	T	.	.	.	.	.	.	.	.	.	.	.	.	.	.	.	c.490T>C	p.Tyr164His	p.Y164H	ENST00000373409	1/5	139	17	122	95	95	0	UGT1A4,missense_variant,p.Tyr164His,ENST00000373409,;UGT1A10,intron_variant,,ENST00000373445,;UGT1A6,intron_variant,,ENST00000305139,;UGT1A6,intron_variant,,ENST00000373424,;UGT1A8,intron_variant,,ENST00000608381,;UGT1A7,intron_variant,,ENST00000373426,;UGT1A8,intron_variant,,ENST00000609637,;UGT1A5,intron_variant,,ENST00000373414,;UGT1A6,intron_variant,,ENST00000406651,;UGT1A10,intron_variant,,E…	C	ENSG00000244474
UGT1A4	0	.	GRCh37	2	234681079	234681079	+	Silent	SNP	T	T	C	.	.	BRCA		TCGA-BH-A18G-01A-11D-A12B-09	TCGA-BH-A18G-10A-01D-A12B-09	T	T	.	.	.	.	.	.	.	.	.	.	.	.	.	.	.	c.1479T>C	p.%3D	p.I493I	ENST00000373409	5/5	381	238	143	393	393	0	UGT1A4,synonymous_variant,p.%3D,ENST00000373409,;UGT1A6,synonymous_variant,p.%3D,ENST00000305139,;UGT1A3,synonymous_variant,p.%3D,ENST00000482026,;UGT1A6,synonymous_variant,p.%3D,ENST00000373424,;UGT1A8,synonymous_variant,p.%3D,ENST00000608383,;UGT1A8,synonymous_variant,p.%3D,ENST00000608381,;UGT1A7,synonymous_variant,p.%3D,ENST00000373426,;UGT1A8,synonymous_variant,p.%3D,ENST00000609637,;UGT1A8,…	C	ENSG00000244474
UGT1A4	0	.	GRCh37	2	234680926	234680926	+	Missense_Mutation	SNP	G	G	A	.	.	BRCA		TCGA-D8-A146-01A-31D-A10Y-09	TCGA-D8-A146-10A-01D-A110-09	G	G	.	.	.	.	.	.	.	.	.	.	.	.	.	.	.	c.1326G>A	p.Met442Ile	p.M442I	ENST00000373409	5/5	114	94	20	79	79	0	UGT1A4,missense_variant,p.Met442Ile,ENST00000373409,;UGT1A6,missense_variant,p.Met440Ile,ENST00000305139,;UGT1A3,missense_variant,p.Met442Ile,ENST00000482026,;UGT1A6,missense_variant,p.Met173Ile,ENST00000373424,;UGT1A8,missense_variant,p.Met441Ile,ENST00000608383,;UGT1A8,missense_variant,p.Met442Ile,ENST00000608381,;UGT1A7,missense_variant,p.Met438Ile,ENST00000373426,;UGT1A8,missense_variant,p.Me…	A	ENSG00000244474
UGT1A4	0	.	GRCh37	2	234680995	234680995	+	Silent	SNP	T	T	C	rs757417206	.	BRCA		TCGA-D8-A1X6-01A-11D-A14K-09	TCGA-D8-A1X6-10A-01D-A14K-09	T	T	.	.	.	.	.	.	.	.	.	.	.	.	.	.	.	c.1395T>C	p.%3D	p.F465F	ENST00000373409	5/5	91	46	44	24	24	0	UGT1A4,synonymous_variant,p.%3D,ENST00000373409,;UGT1A6,synonymous_variant,p.%3D,ENST00000305139,;UGT1A3,synonymous_variant,p.%3D,ENST00000482026,;UGT1A6,synonymous_variant,p.%3D,ENST00000373424,;UGT1A8,synonymous_variant,p.%3D,ENST00000608383,;UGT1A8,synonymous_variant,p.%3D,ENST00000608381,;UGT1A7,synonymous_variant,p.%3D,ENST00000373426,;UGT1A8,synonymous_variant,p.%3D,ENST00000609637,;UGT1A8,…	C	ENSG00000244474
UGT1A4	0	.	GRCh37	2	234681161	234681161	+	Frame_Shift_Del	DEL	A	A	-	rs553499095	.	BRCA		TCGA-D8-A1XK-01A-21D-A14K-09	TCGA-D8-A1XK-10A-01D-A14K-09	A	A	.	.	.	.	.	.	.	.	.	.	.	.	.	.	.	c.1566delA	p.Arg524GlufsTer22	p.R524Efs*22	ENST00000373409	5/5	99	89	10	91	91	0	UGT1A4,frameshift_variant,p.Arg524GlufsTer22,ENST00000373409,;UGT1A6,frameshift_variant,p.Arg522GlufsTer22,ENST00000305139,;UGT1A3,frameshift_variant,p.Arg524GlufsTer22,ENST00000482026,;UGT1A6,frameshift_variant,p.Arg255GlufsTer22,ENST00000373424,;UGT1A8,frameshift_variant,p.Arg523GlufsTer?,ENST00000608383,;UGT1A8,frameshift_variant,p.Arg524GlufsTer22,ENST00000608381,;UGT1A7,frameshift_variant,p.…	-	ENSG00000244474
UGT1A4	0	.	GRCh37	2	234628179	234628179	+	Frame_Shift_Del	DEL	T	T	-	novel	.	BRCA		TCGA-D8-A27V-01A-12D-A17D-09	TCGA-D8-A27V-10A-01D-A17D-09	T	T	.	.	.	.	.	.	.	.	.	.	.	.	.	.	.	c.717delT	p.Gln240ArgfsTer23	p.Q240Rfs*23	ENST00000373409	1/5	223	204	19	106	106	0	UGT1A4,frameshift_variant,p.Gln240ArgfsTer23,ENST00000373409,;UGT1A10,intron_variant,,ENST00000373445,;UGT1A6,intron_variant,,ENST00000305139,;UGT1A6,intron_variant,,ENST00000373424,;UGT1A8,intron_variant,,ENST00000608381,;UGT1A7,intron_variant,,ENST00000373426,;UGT1A8,intron_variant,,ENST00000609637,;UGT1A5,intron_variant,,ENST00000373414,;UGT1A6,intron_variant,,ENST00000406651,;UGT1A10,intron_v…	-	ENSG00000244474
UGT1A4	0	.	GRCh37	2	234681013	234681013	+	Silent	SNP	C	C	T	rs769720139	.	BRCA		TCGA-E2-A109-01A-11D-A10M-09	TCGA-E2-A109-10A-01D-A10M-09	C	C	.	.	.	.	.	.	.	.	.	.	.	.	.	.	.	c.1413C>T	p.%3D	p.G471G	ENST00000373409	5/5	292	154	138	207	207	0	UGT1A4,synonymous_variant,p.%3D,ENST00000373409,;UGT1A6,synonymous_variant,p.%3D,ENST00000305139,;UGT1A3,synonymous_variant,p.%3D,ENST00000482026,;UGT1A6,synonymous_variant,p.%3D,ENST00000373424,;UGT1A8,synonymous_variant,p.%3D,ENST00000608383,;UGT1A8,synonymous_variant,p.%3D,ENST00000608381,;UGT1A7,synonymous_variant,p.%3D,ENST00000373426,;UGT1A8,synonymous_variant,p.%3D,ENST00000609637,;UGT1A8,…	T	ENSG00000244474
UGT1A4	0	.	GRCh37	2	234681279	234681279	+	3'UTR	SNP	T	T	A	novel	.	BRCA		TCGA-E9-A1RF-01A-11D-A159-09	TCGA-E9-A1RF-10A-01D-A159-09	T	T	.	.	.	.	.	.	.	.	.	.	.	.	.	.	.	c.*74T>A	.	.	ENST00000373409	5/5	21	18	3	36	36	0	UGT1A4,3_prime_UTR_variant,,ENST00000373409,;UGT1A6,3_prime_UTR_variant,,ENST00000305139,;UGT1A3,3_prime_UTR_variant,,ENST00000482026,;UGT1A6,3_prime_UTR_variant,,ENST00000373424,;UGT1A8,3_prime_UTR_variant,,ENST00000608381,;UGT1A7,3_prime_UTR_variant,,ENST00000373426,;UGT1A8,3_prime_UTR_variant,,ENST00000609637,;UGT1A8,3_prime_UTR_variant,,ENST00000609767,;UGT1A5,3_prime_UTR_variant,,ENST0000037…	A	ENSG00000244474
UGT1A5	0	.	GRCh37	2	234622410	234622410	+	Missense_Mutation	SNP	G	G	A	rs377333605	.	BRCA		TCGA-A7-A56D-01A-11D-A27P-09	TCGA-A7-A56D-10A-01D-A27P-09	G	G	.	.	.	.	.	.	.	.	.	.	.	.	.	.	.	c.773G>A	p.Arg258Gln	p.R258Q	ENST00000373414	1/5	100	93	7	81	81	0	UGT1A5,missense_variant,p.Arg258Gln,ENST00000373414,;UGT1A8,missense_variant,p.Arg258Gln,ENST00000608381,;UGT1A10,intron_variant,,ENST00000373445,;UGT1A6,intron_variant,,ENST00000305139,;UGT1A6,intron_variant,,ENST00000406651,;UGT1A6,intron_variant,,ENST00000373424,;UGT1A7,intron_variant,,ENST00000373426,;UGT1A8,intron_variant,,ENST00000373450,;UGT1A10,intron_variant,,ENST00000344644,;UGT1A8,intr…	A	ENSG00000240224
UGT1A5	0	.	GRCh37	2	234621857	234621857	+	Missense_Mutation	SNP	T	T	A	novel	.	BRCA		TCGA-A8-A09T-01A-11W-A019-09	TCGA-A8-A09T-10A-01W-A021-09	T	T	.	.	.	.	.	.	.	.	.	.	.	.	.	.	.	c.220T>A	p.Phe74Ile	p.F74I	ENST00000373414	1/5	192	185	7	139	139	0	UGT1A8,missense_variant,p.Phe74Ile,ENST00000608381,;UGT1A5,missense_variant,p.Phe74Ile,ENST00000373414,;UGT1A10,intron_variant,,ENST00000373445,;UGT1A6,intron_variant,,ENST00000305139,;UGT1A6,intron_variant,,ENST00000373424,;UGT1A7,intron_variant,,ENST00000373426,;UGT1A8,intron_variant,,ENST00000609637,;UGT1A6,intron_variant,,ENST00000406651,;UGT1A10,intron_variant,,ENST00000344644,;UGT1A8,intron…	A	ENSG00000240224
UGT1A5	0	.	GRCh37	2	234622145	234622145	+	Missense_Mutation	SNP	G	G	A	novel	.	BRCA		TCGA-AC-A23C-01A-12D-A167-09	TCGA-AC-A23C-10A-01D-A167-09	G	G	.	.	.	.	.	.	.	.	.	.	.	.	.	.	.	c.508G>A	p.Val170Met	p.V170M	ENST00000373414	1/5	79	71	8	77	77	0	UGT1A8,missense_variant,p.Val170Met,ENST00000608381,;UGT1A5,missense_variant,p.Val170Met,ENST00000373414,;UGT1A10,intron_variant,,ENST00000373445,;UGT1A6,intron_variant,,ENST00000305139,;UGT1A6,intron_variant,,ENST00000373424,;UGT1A7,intron_variant,,ENST00000373426,;UGT1A8,intron_variant,,ENST00000609637,;UGT1A6,intron_variant,,ENST00000406651,;UGT1A10,intron_variant,,ENST00000344644,;UGT1A8,intr…	A	ENSG00000240224
UGT1A5	0	.	GRCh37	2	234622270	234622270	+	Silent	SNP	C	C	A	.	.	BRCA		TCGA-E2-A1LH-01A-11D-A14G-09	TCGA-E2-A1LH-11A-22D-A14G-09	C	C	.	.	.	.	.	.	.	.	.	.	.	.	.	.	.	c.633C>A	p.%3D	p.V211V	ENST00000373414	1/5	184	156	28	140	140	0	UGT1A8,synonymous_variant,p.%3D,ENST00000608381,;UGT1A5,synonymous_variant,p.%3D,ENST00000373414,;UGT1A10,intron_variant,,ENST00000373445,;UGT1A6,intron_variant,,ENST00000305139,;UGT1A6,intron_variant,,ENST00000373424,;UGT1A7,intron_variant,,ENST00000373426,;UGT1A8,intron_variant,,ENST00000609637,;UGT1A6,intron_variant,,ENST00000406651,;UGT1A10,intron_variant,,ENST00000344644,;UGT1A8,intron_varia…	A	ENSG00000240224
UGT1A6	0	.	GRCh37	2	234601870	234601870	+	Missense_Mutation	SNP	A	A	G	.	.	BRCA		TCGA-A8-A09Q-01A-11W-A019-09	TCGA-A8-A09Q-10A-01W-A021-09	A	A	.	.	.	.	.	.	.	.	.	.	.	.	.	.	.	c.220A>G	p.Thr74Ala	p.T74A	ENST00000305139	1/5	205	179	25	221	221	0	UGT1A6,missense_variant,p.Thr74Ala,ENST00000441351,;UGT1A6,missense_variant,p.Thr74Ala,ENST00000305139,;UGT1A10,intron_variant,,ENST00000373445,;UGT1A6,intron_variant,,ENST00000373424,;UGT1A7,intron_variant,,ENST00000373426,;UGT1A8,intron_variant,,ENST00000609637,;UGT1A10,intron_variant,,ENST00000344644,;UGT1A8,intron_variant,,ENST00000373450,;UGT1A9,intron_variant,,ENST00000354728,;UGT1A7,downst…	G	ENSG00000167165
UGT1A6	0	.	GRCh37	2	234601797	234601797	+	Silent	SNP	C	C	A	.	.	BRCA		TCGA-AC-A23H-01A-11D-A159-09	TCGA-AC-A23H-11A-12D-A17G-09	C	C	.	.	.	.	.	.	.	.	.	.	.	.	.	.	.	c.147C>A	p.%3D	p.L49L	ENST00000305139	1/5	80	70	9	57	57	0	UGT1A6,synonymous_variant,p.%3D,ENST00000441351,;UGT1A6,synonymous_variant,p.%3D,ENST00000305139,;UGT1A10,intron_variant,,ENST00000373445,;UGT1A6,intron_variant,,ENST00000373424,;UGT1A7,intron_variant,,ENST00000373426,;UGT1A8,intron_variant,,ENST00000609637,;UGT1A10,intron_variant,,ENST00000344644,;UGT1A8,intron_variant,,ENST00000373450,;UGT1A9,intron_variant,,ENST00000354728,;UGT1A7,downstream_g…	A	ENSG00000167165
UGT1A6	0	.	GRCh37	2	234601855	234601855	+	Nonsense_Mutation	SNP	G	G	T	.	.	BRCA		TCGA-AN-A046-01A-21W-A050-09	TCGA-AN-A046-10A-01W-A055-09	G	G	.	.	.	.	.	.	.	.	.	.	.	.	.	.	.	c.205G>T	p.Glu69Ter	p.E69*	ENST00000305139	1/5	199	181	18	259	259	0	UGT1A6,stop_gained,p.Glu69Ter,ENST00000441351,;UGT1A6,stop_gained,p.Glu69Ter,ENST00000305139,;UGT1A10,intron_variant,,ENST00000373445,;UGT1A6,intron_variant,,ENST00000373424,;UGT1A7,intron_variant,,ENST00000373426,;UGT1A8,intron_variant,,ENST00000609637,;UGT1A10,intron_variant,,ENST00000344644,;UGT1A8,intron_variant,,ENST00000373450,;UGT1A9,intron_variant,,ENST00000354728,;UGT1A7,downstream_gene_…	T	ENSG00000167165
UGT1A6	0	.	GRCh37	2	234602486	234602486	+	Missense_Mutation	SNP	G	G	T	novel	.	BRCA		TCGA-AN-A0AL-01A-11W-A019-09	TCGA-AN-A0AL-10A-01W-A021-09	G	G	.	.	.	.	.	.	.	.	.	.	.	.	.	.	.	c.836G>T	p.Cys279Phe	p.C279F	ENST00000305139	1/5	920	897	23	1285	1284	1	UGT1A6,missense_variant,p.Cys279Phe,ENST00000305139,;UGT1A6,missense_variant,p.Cys12Phe,ENST00000373424,;UGT1A6,missense_variant,p.Cys12Phe,ENST00000406651,;UGT1A10,intron_variant,,ENST00000373445,;UGT1A7,intron_variant,,ENST00000373426,;UGT1A8,intron_variant,,ENST00000609637,;UGT1A10,intron_variant,,ENST00000344644,;UGT1A8,intron_variant,,ENST00000373450,;UGT1A9,intron_variant,,ENST00000354728,;…	T	ENSG00000167165
UGT1A6	0	.	GRCh37	2	234601744	234601744	+	Missense_Mutation	SNP	G	G	T	.	.	BRCA		TCGA-E2-A15T-01A-11D-A10Y-09	TCGA-E2-A15T-10A-01D-A110-09	G	G	.	.	.	.	.	.	.	.	.	.	.	.	.	.	.	c.94G>T	p.Val32Phe	p.V32F	ENST00000305139	1/5	25	11	13	86	86	0	UGT1A6,missense_variant,p.Val32Phe,ENST00000441351,;UGT1A6,missense_variant,p.Val32Phe,ENST00000305139,;UGT1A10,intron_variant,,ENST00000373445,;UGT1A6,intron_variant,,ENST00000373424,;UGT1A7,intron_variant,,ENST00000373426,;UGT1A8,intron_variant,,ENST00000609637,;UGT1A10,intron_variant,,ENST00000344644,;UGT1A8,intron_variant,,ENST00000373450,;UGT1A9,intron_variant,,ENST00000354728,;UGT1A7,downst…	T	ENSG00000167165
UGT1A7	0	.	GRCh37	2	234591216	234591216	+	Missense_Mutation	SNP	C	C	G	.	.	BRCA		TCGA-A8-A084-01A-21W-A019-09	TCGA-A8-A084-10A-01W-A021-09	C	C	.	.	.	.	.	.	.	.	.	.	.	.	.	.	.	c.633C>G	p.Ile211Met	p.I211M	ENST00000373426	1/5	1122	927	195	953	953	0	UGT1A7,missense_variant,p.Ile211Met,ENST00000373426,;UGT1A7,missense_variant,p.Ile68Met,ENST00000485022,;UGT1A10,intron_variant,,ENST00000373445,;UGT1A10,intron_variant,,ENST00000344644,;UGT1A8,intron_variant,,ENST00000373450,;UGT1A8,intron_variant,,ENST00000609637,;UGT1A9,intron_variant,,ENST00000354728,;	G	ENSG00000244122
UGT1A8	0	.	GRCh37	2	234669446	234669446	+	Intron	SNP	C	C	T	.	.	BRCA		TCGA-A8-A06Q-01A-11W-A050-09	TCGA-A8-A06Q-10A-01W-A055-09	C	C	.	.	.	.	.	.	.	.	.	.	.	.	.	.	.	c.868-6234C>T	.	.	ENST00000609767	.	69	50	18	132	132	0	UGT1A8,synonymous_variant,p.%3D,ENST00000608383,;UGT1A8,synonymous_variant,p.%3D,ENST00000360418,;UGT1A1,synonymous_variant,p.%3D,ENST00000305208,;UGT1A10,intron_variant,,ENST00000373445,;UGT1A4,intron_variant,,ENST00000373409,;UGT1A6,intron_variant,,ENST00000305139,;UGT1A3,intron_variant,,ENST00000482026,;UGT1A6,intron_variant,,ENST00000373424,;UGT1A8,intron_variant,,ENST00000608381,;UGT1A7,intr…	T	ENSG00000241635
UGT1A8	0	.	GRCh37	2	234527048	234527048	+	Missense_Mutation	SNP	C	C	G	.	.	BRCA		TCGA-AC-A23H-01A-11D-A159-09	TCGA-AC-A23H-11A-12D-A17G-09	C	C	.	.	.	.	.	.	.	.	.	.	.	.	.	.	.	c.695C>G	p.Ser232Cys	p.S232C	ENST00000373450	1/5	153	122	30	181	181	0	UGT1A8,missense_variant,p.Ser232Cys,ENST00000373450,;	G	ENSG00000241635
UGT1A8	0	.	GRCh37	2	234669682	234669682	+	Intron	SNP	C	C	G	.	.	BRCA		TCGA-AC-A5XS-01A-11D-A29N-09	TCGA-AC-A5XS-10A-01D-A29N-09	C	C	.	.	.	.	.	.	.	.	.	.	.	.	.	.	.	c.868-5998C>G	.	.	ENST00000609767	.	69	53	15	96	96	0	UGT1A8,missense_variant,p.Ser250Cys,ENST00000608383,;UGT1A8,missense_variant,p.Ser250Cys,ENST00000360418,;UGT1A1,missense_variant,p.Ser250Cys,ENST00000305208,;UGT1A10,intron_variant,,ENST00000373445,;UGT1A4,intron_variant,,ENST00000373409,;UGT1A6,intron_variant,,ENST00000305139,;UGT1A3,intron_variant,,ENST00000482026,;UGT1A6,intron_variant,,ENST00000373424,;UGT1A8,intron_variant,,ENST00000608381,…	G	ENSG00000241635
UGT1A8	0	.	GRCh37	2	234527114	234527114	+	Missense_Mutation	SNP	G	G	A	rs776779114	.	BRCA		TCGA-AN-A046-01A-21W-A050-09	TCGA-AN-A046-10A-01W-A055-09	G	G	.	.	.	.	.	.	.	.	.	.	.	.	.	.	.	c.761G>A	p.Arg254Gln	p.R254Q	ENST00000373450	1/5	254	235	19	343	343	0	UGT1A8,missense_variant,p.Arg254Gln,ENST00000373450,;	A	ENSG00000241635
UGT1A8	0	.	GRCh37	2	234669013	234669013	+	Intron	SNP	C	C	A	.	.	BRCA		TCGA-AN-A046-01A-21W-A050-09	TCGA-AN-A046-10A-01W-A055-09	C	C	.	.	.	.	.	.	.	.	.	.	.	.	.	.	.	c.868-6667C>A	.	.	ENST00000609767	.	46	32	14	92	92	0	UGT1A8,missense_variant,p.Ala27Asp,ENST00000608383,;UGT1A8,missense_variant,p.Ala27Asp,ENST00000360418,;UGT1A1,missense_variant,p.Ala27Asp,ENST00000305208,;UGT1A10,intron_variant,,ENST00000373445,;UGT1A4,intron_variant,,ENST00000373409,;UGT1A6,intron_variant,,ENST00000305139,;UGT1A3,intron_variant,,ENST00000482026,;UGT1A6,intron_variant,,ENST00000373424,;UGT1A8,intron_variant,,ENST00000608381,;UG…	A	ENSG00000241635
UGT1A8	0	.	GRCh37	2	234669767	234669767	+	Intron	SNP	C	C	T	novel	.	BRCA		TCGA-D8-A142-01A-11D-A10Y-09	TCGA-D8-A142-10A-01D-A110-09	C	C	.	.	.	.	.	.	.	.	.	.	.	.	.	.	.	c.868-5913C>T	.	.	ENST00000609767	.	188	169	18	110	110	0	UGT1A8,synonymous_variant,p.%3D,ENST00000608383,;UGT1A8,synonymous_variant,p.%3D,ENST00000360418,;UGT1A1,synonymous_variant,p.%3D,ENST00000305208,;UGT1A10,intron_variant,,ENST00000373445,;UGT1A4,intron_variant,,ENST00000373409,;UGT1A6,intron_variant,,ENST00000305139,;UGT1A3,intron_variant,,ENST00000482026,;UGT1A6,intron_variant,,ENST00000373424,;UGT1A8,intron_variant,,ENST00000608381,;UGT1A7,intr…	T	ENSG00000241635
UGT1A8	0	.	GRCh37	2	234669637	234669637	+	Intron	SNP	C	C	T	.	.	BRCA		TCGA-D8-A1JH-01A-11D-A188-09	TCGA-D8-A1JH-10A-01D-A13O-09	C	C	.	.	.	.	.	.	.	.	.	.	.	.	.	.	.	c.868-6043C>T	.	.	ENST00000609767	.	87	81	5	106	106	0	UGT1A8,missense_variant,p.Ser235Leu,ENST00000608383,;UGT1A8,missense_variant,p.Ser235Leu,ENST00000360418,;UGT1A1,missense_variant,p.Ser235Leu,ENST00000305208,;UGT1A10,intron_variant,,ENST00000373445,;UGT1A4,intron_variant,,ENST00000373409,;UGT1A6,intron_variant,,ENST00000305139,;UGT1A3,intron_variant,,ENST00000482026,;UGT1A6,intron_variant,,ENST00000373424,;UGT1A8,intron_variant,,ENST00000608381,…	T	ENSG00000241635
UGT1A8	0	.	GRCh37	2	234526969	234526969	+	Missense_Mutation	SNP	A	A	G	.	.	BRCA		TCGA-EW-A1P4-01A-21D-A142-09	TCGA-EW-A1P4-10A-01D-A142-09	A	A	.	.	.	.	.	.	.	.	.	.	.	.	.	.	.	c.616A>G	p.Arg206Gly	p.R206G	ENST00000373450	1/5	65	49	16	125	125	0	UGT1A8,missense_variant,p.Arg206Gly,ENST00000373450,;	G	ENSG00000241635
UGT1A8	0	.	GRCh37	2	234669368	234669368	+	Intron	SNP	T	T	G	novel	.	BRCA		TCGA-PE-A5DC-01A-12D-A27P-09	TCGA-PE-A5DC-10A-01D-A27P-09	T	T	.	.	.	.	.	.	.	.	.	.	.	.	.	.	.	c.868-6312T>G	.	.	ENST00000609767	.	39	28	11	43	43	0	UGT1A8,missense_variant,p.Phe145Leu,ENST00000608383,;UGT1A8,missense_variant,p.Phe145Leu,ENST00000360418,;UGT1A1,missense_variant,p.Phe145Leu,ENST00000305208,;UGT1A10,intron_variant,,ENST00000373445,;UGT1A4,intron_variant,,ENST00000373409,;UGT1A6,intron_variant,,ENST00000305139,;UGT1A3,intron_variant,,ENST00000482026,;UGT1A6,intron_variant,,ENST00000373424,;UGT1A8,intron_variant,,ENST00000608381,…	G	ENSG00000241635
UGT1A8	0	.	GRCh37	2	234526440	234526440	+	Silent	SNP	G	G	A	rs375473376	.	BRCA		TCGA-XX-A899-01A-11D-A36J-09	TCGA-XX-A899-10A-01D-A36M-09	G	G	.	.	.	.	.	.	.	.	.	.	.	.	.	.	.	c.87G>A	p.%3D	p.L29L	ENST00000373450	1/5	111	106	5	147	147	0	UGT1A8,synonymous_variant,p.%3D,ENST00000373450,;	A	ENSG00000241635
UGT1A9	0	.	GRCh37	2	234580899	234580899	+	Missense_Mutation	SNP	T	T	A	novel	.	BRCA		TCGA-A2-A0SU-01A-11D-A099-09	TCGA-A2-A0SU-10A-01D-A099-09	T	T	.	.	.	.	.	.	.	.	.	.	.	.	.	.	.	c.319T>A	p.Ser107Thr	p.S107T	ENST00000354728	1/5	223	209	13	181	181	0	UGT1A8,missense_variant,p.Ser107Thr,ENST00000609637,;UGT1A9,missense_variant,p.Ser107Thr,ENST00000354728,;UGT1A10,intron_variant,,ENST00000373445,;UGT1A10,intron_variant,,ENST00000344644,;UGT1A8,intron_variant,,ENST00000373450,;	A	ENSG00000241119
UGT1A9	0	.	GRCh37	2	234580863	234580863	+	Missense_Mutation	SNP	C	C	G	rs749656170	.	BRCA		TCGA-AC-A8OP-01A-11D-A36J-09	TCGA-AC-A8OP-10A-01D-A36M-09	C	C	.	.	.	.	.	.	.	.	.	.	.	.	.	.	.	c.283C>G	p.His95Asp	p.H95D	ENST00000354728	1/5	90	67	23	156	156	0	UGT1A8,missense_variant,p.His95Asp,ENST00000609637,;UGT1A9,missense_variant,p.His95Asp,ENST00000354728,;UGT1A10,intron_variant,,ENST00000373445,;UGT1A10,intron_variant,,ENST00000344644,;UGT1A8,intron_variant,,ENST00000373450,;	G	ENSG00000241119
UGT1A9	0	.	GRCh37	2	234580887	234580887	+	Nonsense_Mutation	SNP	C	C	T	rs772152340	.	BRCA		TCGA-AN-A046-01A-21W-A050-09	TCGA-AN-A046-10A-01W-A055-09	C	C	.	.	.	.	.	.	.	.	.	.	.	.	.	.	.	c.307C>T	p.Arg103Ter	p.R103*	ENST00000354728	1/5	339	244	94	321	321	0	UGT1A8,stop_gained,p.Arg103Ter,ENST00000609637,;UGT1A9,stop_gained,p.Arg103Ter,ENST00000354728,;UGT1A10,intron_variant,,ENST00000373445,;UGT1A10,intron_variant,,ENST00000344644,;UGT1A8,intron_variant,,ENST00000373450,;	T	ENSG00000241119
UGT1A9	0	.	GRCh37	2	234581019	234581019	+	Missense_Mutation	SNP	C	C	T	.	.	BRCA		TCGA-C8-A3M7-01A-12D-A21Q-09	TCGA-C8-A3M7-10A-01D-A21Q-09	C	C	.	.	.	.	.	.	.	.	.	.	.	.	.	.	.	c.439C>T	p.Leu147Phe	p.L147F	ENST00000354728	1/5	49	40	9	43	43	0	UGT1A8,missense_variant,p.Leu147Phe,ENST00000609637,;UGT1A9,missense_variant,p.Leu147Phe,ENST00000354728,;UGT1A10,intron_variant,,ENST00000373445,;UGT1A10,intron_variant,,ENST00000344644,;UGT1A8,intron_variant,,ENST00000373450,;	T	ENSG00000241119
UGT2A1	0	.	GRCh37	4	70462090	70462090	+	Nonsense_Mutation	SNP	C	C	A	rs199540980	.	BRCA		TCGA-5L-AAT1-01A-12D-A41F-09	TCGA-5L-AAT1-10A-01D-A41F-09	C	C	.	.	.	.	.	.	.	.	.	.	.	.	.	.	.	c.874G>T	p.Glu292Ter	p.E292*	ENST00000503640	3/6	139	109	29	80	80	0	UGT2A1,stop_gained,p.Glu292Ter,ENST00000503640,;UGT2A2,stop_gained,p.Glu301Ter,ENST00000457664,;UGT2A2,stop_gained,p.Glu302Ter,ENST00000604629,;UGT2A1,intron_variant,,ENST00000286604,;UGT2A1,intron_variant,,ENST00000514019,;UGT2A2,intron_variant,,ENST00000604021,;UGT2A1,intron_variant,,ENST00000512704,;UGT2A1,intron_variant,,ENST00000502343,;UGT2A1,non_coding_transcript_exon_variant,,ENST00000514…	A	ENSG00000173610
UGT2A1	0	.	GRCh37	4	70512828	70512828	+	Missense_Mutation	SNP	C	C	T	.	.	BRCA		TCGA-AC-A3W5-01A-11D-A228-09	TCGA-AC-A3W5-10A-01D-A22A-09	C	C	.	.	.	.	.	.	.	.	.	.	.	.	.	.	.	c.535G>A	p.Val179Met	p.V179M	ENST00000514019	2/7	58	41	17	57	57	0	UGT2A1,missense_variant,p.Val179Met,ENST00000286604,;UGT2A1,missense_variant,p.Val179Met,ENST00000514019,;UGT2A1,missense_variant,p.Val179Met,ENST00000512704,;UGT2A1,missense_variant,p.Val179Met,ENST00000503640,;UGT2A1,downstream_gene_variant,,ENST00000505512,;	T	ENSG00000270386
UGT2A1	0	.	GRCh37	4	70512677	70512677	+	Nonsense_Mutation	SNP	G	G	T	rs771258078	.	BRCA		TCGA-AN-A046-01A-21W-A050-09	TCGA-AN-A046-10A-01W-A055-09	G	G	.	.	.	.	.	.	.	.	.	.	.	.	.	.	.	c.686C>A	p.Ser229Ter	p.S229*	ENST00000514019	2/7	45	41	4	75	75	0	UGT2A1,stop_gained,p.Ser229Ter,ENST00000286604,;UGT2A1,stop_gained,p.Ser229Ter,ENST00000514019,;UGT2A1,stop_gained,p.Ser229Ter,ENST00000512704,;UGT2A1,stop_gained,p.Ser229Ter,ENST00000503640,;UGT2A1,downstream_gene_variant,,ENST00000505512,;	T	ENSG00000270386
UGT2A1	0	.	GRCh37	4	70455098	70455098	+	Frame_Shift_Del	DEL	T	T	-	.	.	BRCA		TCGA-AN-A0AK-01A-21W-A019-09	TCGA-AN-A0AK-10A-01W-A021-09	T	T	.	.	.	.	.	.	.	.	.	.	.	.	.	.	.	c.2074delA	p.Arg692GlufsTer57	p.R692Efs*57	ENST00000514019	7/7	130	106	24	93	93	0	UGT2A1,frameshift_variant,p.Arg526GlufsTer?,ENST00000286604,;UGT2A1,frameshift_variant,p.Arg692GlufsTer57,ENST00000514019,;UGT2A1,frameshift_variant,p.Arg526GlufsTer57,ENST00000503640,;UGT2A2,frameshift_variant,p.Arg492GlufsTer?,ENST00000604021,;UGT2A2,frameshift_variant,p.Arg535GlufsTer57,ENST00000457664,;UGT2A1,frameshift_variant,p.Arg482GlufsTer57,ENST00000512704,;UGT2A2,frameshift_variant,p.A…	-	ENSG00000270386
UGT2A1	0	.	GRCh37	4	70464998	70464998	+	Missense_Mutation	SNP	C	C	T	novel	.	BRCA		TCGA-AN-A0AK-01A-21W-A019-09	TCGA-AN-A0AK-10A-01W-A021-09	C	C	.	.	.	.	.	.	.	.	.	.	.	.	.	.	.	c.1460G>A	p.Gly487Glu	p.G487E	ENST00000514019	4/7	116	110	6	109	109	0	UGT2A1,missense_variant,p.Gly321Glu,ENST00000286604,;UGT2A1,missense_variant,p.Gly487Glu,ENST00000514019,;UGT2A1,missense_variant,p.Gly277Glu,ENST00000503640,;UGT2A2,missense_variant,p.Gly287Glu,ENST00000604021,;UGT2A2,missense_variant,p.Gly286Glu,ENST00000457664,;UGT2A1,missense_variant,p.Gly277Glu,ENST00000512704,;UGT2A2,missense_variant,p.Gly287Glu,ENST00000604629,;UGT2A1,non_coding_transcript…	T	ENSG00000270386
UGT2A1	0	.	GRCh37	4	70460341	70460341	+	Silent	SNP	G	G	C	.	.	BRCA		TCGA-AO-A1KT-01A-11D-A13L-09	TCGA-AO-A1KT-10A-01D-A188-09	G	G	.	.	.	.	.	.	.	.	.	.	.	.	.	.	.	c.1656C>G	p.%3D	p.V552V	ENST00000514019	6/7	160	106	54	108	108	0	UGT2A1,synonymous_variant,p.%3D,ENST00000286604,;UGT2A1,synonymous_variant,p.%3D,ENST00000514019,;UGT2A1,synonymous_variant,p.%3D,ENST00000503640,;UGT2A2,synonymous_variant,p.%3D,ENST00000604021,;UGT2A2,synonymous_variant,p.%3D,ENST00000457664,;UGT2A1,synonymous_variant,p.%3D,ENST00000512704,;UGT2A2,synonymous_variant,p.%3D,ENST00000604629,;UGT2A1,non_coding_transcript_exon_variant,,ENST000005023…	C	ENSG00000270386
UGT2A1	0	.	GRCh37	4	70465032	70465032	+	Missense_Mutation	SNP	G	G	A	rs146066278	.	BRCA		TCGA-C8-A26Y-01A-11D-A16D-09	TCGA-C8-A26Y-10A-01D-A16D-09	G	G	.	.	.	.	.	.	.	.	.	.	.	.	.	.	.	c.1426C>T	p.Arg476Cys	p.R476C	ENST00000514019	4/7	43	14	29	35	35	0	UGT2A1,missense_variant,p.Arg310Cys,ENST00000286604,;UGT2A1,missense_variant,p.Arg476Cys,ENST00000514019,;UGT2A1,missense_variant,p.Arg266Cys,ENST00000503640,;UGT2A2,missense_variant,p.Arg276Cys,ENST00000604021,;UGT2A2,missense_variant,p.Arg275Cys,ENST00000457664,;UGT2A1,missense_variant,p.Arg266Cys,ENST00000512704,;UGT2A2,missense_variant,p.Arg276Cys,ENST00000604629,;UGT2A1,non_coding_transcript…	A	ENSG00000270386
UGT2A1	0	.	GRCh37	4	70513359	70513359	+	Silent	SNP	A	A	G	novel	.	BRCA		TCGA-D8-A1XQ-01A-11D-A14K-09	TCGA-D8-A1XQ-10A-01D-A14K-09	A	A	.	.	.	.	.	.	.	.	.	.	.	.	.	.	.	c.4T>C	p.%3D	p.L2L	ENST00000514019	2/7	36	30	6	30	30	0	UGT2A1,synonymous_variant,p.%3D,ENST00000505512,;UGT2A1,synonymous_variant,p.%3D,ENST00000286604,;UGT2A1,synonymous_variant,p.%3D,ENST00000514019,;UGT2A1,synonymous_variant,p.%3D,ENST00000512704,;UGT2A1,synonymous_variant,p.%3D,ENST00000503640,;	G	ENSG00000270386
UGT2A1	0	.	GRCh37	4	70462045	70462045	+	Silent	SNP	G	G	A	.	.	BRCA		TCGA-D8-A1Y1-01A-21D-A14K-09	TCGA-D8-A1Y1-10A-01D-A14K-09	G	G	.	.	.	.	.	.	.	.	.	.	.	.	.	.	.	c.919C>T	p.%3D	p.L307L	ENST00000503640	3/6	110	59	51	76	76	0	UGT2A1,synonymous_variant,p.%3D,ENST00000503640,;UGT2A2,synonymous_variant,p.%3D,ENST00000457664,;UGT2A2,synonymous_variant,p.%3D,ENST00000604629,;UGT2A1,intron_variant,,ENST00000286604,;UGT2A1,intron_variant,,ENST00000514019,;UGT2A2,intron_variant,,ENST00000604021,;UGT2A1,intron_variant,,ENST00000512704,;UGT2A1,intron_variant,,ENST00000502343,;UGT2A1,non_coding_transcript_exon_variant,,ENST00000…	A	ENSG00000173610
UGT2A1	0	.	GRCh37	4	70455314	70455314	+	Missense_Mutation	SNP	G	G	T	rs766782549	.	BRCA		TCGA-E2-A14N-01A-31D-A135-09	TCGA-E2-A14N-10A-01D-A135-09	G	G	.	.	.	.	.	.	.	.	.	.	.	.	.	.	.	c.1858C>A	p.Pro620Thr	p.P620T	ENST00000514019	7/7	349	290	59	336	335	1	UGT2A1,missense_variant,p.Pro454Thr,ENST00000286604,;UGT2A1,missense_variant,p.Pro620Thr,ENST00000514019,;UGT2A1,missense_variant,p.Pro454Thr,ENST00000503640,;UGT2A2,missense_variant,p.Pro420Thr,ENST00000604021,;UGT2A2,missense_variant,p.Pro463Thr,ENST00000457664,;UGT2A1,missense_variant,p.Pro410Thr,ENST00000512704,;UGT2A2,missense_variant,p.Pro464Thr,ENST00000604629,;UGT2A1,downstream_gene_varia…	T	ENSG00000270386
UGT2A2	0	.	GRCh37	4	70504857	70504857	+	Missense_Mutation	SNP	C	C	A	rs143075946	.	BRCA		TCGA-A8-A08R-01A-11W-A050-09	TCGA-A8-A08R-10A-01W-A055-09	C	C	.	.	.	.	.	.	.	.	.	.	.	.	.	.	.	c.502G>T	p.Val168Phe	p.V168F	ENST00000457664	1/6	116	105	11	121	121	0	UGT2A2,missense_variant,p.Val169Phe,ENST00000604021,;UGT2A2,missense_variant,p.Val168Phe,ENST00000457664,;UGT2A1,missense_variant,p.Val369Phe,ENST00000514019,;UGT2A2,missense_variant,p.Val169Phe,ENST00000604629,;UGT2A1,intron_variant,,ENST00000286604,;UGT2A1,intron_variant,,ENST00000512704,;UGT2A1,intron_variant,,ENST00000503640,;	A	ENSG00000271271
UGT2A2	0	.	GRCh37	4	70505195	70505195	+	Missense_Mutation	SNP	C	C	A	.	.	BRCA		TCGA-AN-A046-01A-21W-A050-09	TCGA-AN-A046-10A-01W-A055-09	C	C	.	.	.	.	.	.	.	.	.	.	.	.	.	.	.	c.164G>T	p.Arg55Ile	p.R55I	ENST00000457664	1/6	229	158	70	400	399	0	UGT2A2,missense_variant,p.Arg56Ile,ENST00000604021,;UGT2A2,missense_variant,p.Arg55Ile,ENST00000457664,;UGT2A1,missense_variant,p.Arg256Ile,ENST00000514019,;UGT2A2,missense_variant,p.Arg56Ile,ENST00000604629,;UGT2A1,intron_variant,,ENST00000286604,;UGT2A1,intron_variant,,ENST00000512704,;UGT2A1,intron_variant,,ENST00000503640,;	A	ENSG00000271271
UGT2A2	0	.	GRCh37	4	70504971	70504971	+	Missense_Mutation	SNP	T	T	A	.	.	BRCA		TCGA-BH-A0H6-01A-21W-A071-09	TCGA-BH-A0H6-10A-01W-A071-09	T	T	.	.	.	.	.	.	.	.	.	.	.	.	.	.	.	c.388A>T	p.Ile130Phe	p.I130F	ENST00000457664	1/6	299	191	107	253	253	0	UGT2A2,missense_variant,p.Ile131Phe,ENST00000604021,;UGT2A2,missense_variant,p.Ile130Phe,ENST00000457664,;UGT2A1,missense_variant,p.Ile331Phe,ENST00000514019,;UGT2A2,missense_variant,p.Ile131Phe,ENST00000604629,;UGT2A1,intron_variant,,ENST00000286604,;UGT2A1,intron_variant,,ENST00000512704,;UGT2A1,intron_variant,,ENST00000503640,;	A	ENSG00000271271
UGT2A2	0	.	GRCh37	4	70504739	70504739	+	Nonsense_Mutation	SNP	G	G	C	.	.	BRCA		TCGA-EW-A1PB-01A-11D-A142-09	TCGA-EW-A1PB-10A-01D-A142-09	G	G	.	.	.	.	.	.	.	.	.	.	.	.	.	.	.	c.620C>G	p.Ser207Ter	p.S207*	ENST00000457664	1/6	32	16	15	23	23	0	UGT2A2,stop_gained,p.Ser208Ter,ENST00000604021,;UGT2A2,stop_gained,p.Ser207Ter,ENST00000457664,;UGT2A1,stop_gained,p.Ser408Ter,ENST00000514019,;UGT2A2,stop_gained,p.Ser208Ter,ENST00000604629,;UGT2A1,intron_variant,,ENST00000286604,;UGT2A1,intron_variant,,ENST00000512704,;UGT2A1,intron_variant,,ENST00000503640,;	C	ENSG00000271271
UGT2A3	0	.	GRCh37	4	69795647	69795647	+	Missense_Mutation	SNP	C	C	G	novel	.	BRCA		TCGA-A8-A09A-01A-11W-A019-09	TCGA-A8-A09A-10A-01W-A062-09	C	C	.	.	.	.	.	.	.	.	.	.	.	.	.	.	.	c.1468G>C	p.Asp490His	p.D490H	ENST00000251566	6/6	169	157	12	223	223	0	UGT2A3,missense_variant,p.Asp490His,ENST00000251566,;UGT2A3,missense_variant,p.Asp201His,ENST00000420231,;UGT2A3,3_prime_UTR_variant,,ENST00000503012,;	G	ENSG00000135220
UGT2A3	0	.	GRCh37	4	69817413	69817413	+	Silent	SNP	G	G	A	.	.	BRCA		TCGA-BH-A1EW-01A-11D-A135-09	TCGA-BH-A1EW-11B-33D-A135-09	G	G	.	.	.	.	.	.	.	.	.	.	.	.	.	.	.	c.66C>T	p.%3D	p.F22F	ENST00000251566	1/6	96	80	15	99	99	0	UGT2A3,synonymous_variant,p.%3D,ENST00000251566,;UGT2A3,upstream_gene_variant,,ENST00000420231,;UGT2A3,upstream_gene_variant,,ENST00000503012,;	A	ENSG00000135220
UGT2A3	0	.	GRCh37	4	69811106	69811106	+	Missense_Mutation	SNP	T	T	C	novel	.	BRCA		TCGA-D8-A1XK-01A-21D-A14K-09	TCGA-D8-A1XK-10A-01D-A14K-09	T	T	.	.	.	.	.	.	.	.	.	.	.	.	.	.	.	c.782A>G	p.Asp261Gly	p.D261G	ENST00000251566	2/6	159	149	10	80	80	0	UGT2A3,missense_variant,p.Asp261Gly,ENST00000251566,;UGT2A3,5_prime_UTR_variant,,ENST00000420231,;UGT2A3,missense_variant,p.Asp127Gly,ENST00000503012,;	C	ENSG00000135220
UGT2B10	0	.	GRCh37	4	69696347	69696347	+	Missense_Mutation	SNP	G	G	A	rs748758295	.	BRCA		TCGA-A8-A09A-01A-11W-A019-09	TCGA-A8-A09A-10A-01W-A062-09	G	G	.	.	.	.	.	.	.	.	.	.	.	.	.	.	.	c.1337G>A	p.Arg446Lys	p.R446K	ENST00000265403	6/6	353	341	12	418	418	0	UGT2B10,missense_variant,p.Arg446Lys,ENST00000265403,;UGT2B10,missense_variant,p.Arg362Lys,ENST00000458688,;RP11-468N14.3,downstream_gene_variant,,ENST00000512503,;	A	ENSG00000109181
UGT2B10	0	.	GRCh37	4	69683767	69683767	+	Missense_Mutation	SNP	G	G	C	.	.	BRCA		TCGA-AC-A23H-01A-11D-A159-09	TCGA-AC-A23H-11A-12D-A17G-09	G	G	.	.	.	.	.	.	.	.	.	.	.	.	.	.	.	c.739G>C	p.Glu247Gln	p.E247Q	ENST00000265403	2/6	159	128	31	186	186	0	UGT2B10,missense_variant,p.Glu247Gln,ENST00000265403,;UGT2B10,missense_variant,p.Glu163Gln,ENST00000458688,;RP11-468N14.1,downstream_gene_variant,,ENST00000507455,;	C	ENSG00000109181
UGT2B10	0	.	GRCh37	4	69696606	69696606	+	3'UTR	SNP	G	G	C	novel	.	BRCA		TCGA-AC-A23H-01A-11D-A159-09	TCGA-AC-A23H-11A-12D-A17G-09	G	G	.	.	.	.	.	.	.	.	.	.	.	.	.	.	.	c.*9G>C	.	.	ENST00000265403	6/6	248	192	56	232	231	1	UGT2B10,3_prime_UTR_variant,,ENST00000265403,;UGT2B10,3_prime_UTR_variant,,ENST00000458688,;RP11-468N14.3,downstream_gene_variant,,ENST00000512503,;	C	ENSG00000109181
UGT2B10	0	.	GRCh37	4	69692131	69692131	+	Missense_Mutation	SNP	C	C	A	rs527412075	.	BRCA		TCGA-AN-A046-01A-21W-A050-09	TCGA-AN-A046-10A-01W-A055-09	C	C	.	.	.	.	.	.	.	.	.	.	.	.	.	.	.	c.1003C>A	p.Leu335Ile	p.L335I	ENST00000265403	4/6	467	446	20	685	685	0	UGT2B10,missense_variant,p.Leu335Ile,ENST00000265403,;UGT2B10,missense_variant,p.Leu251Ile,ENST00000458688,;	A	ENSG00000109181
UGT2B10	0	.	GRCh37	4	69682121	69682121	+	Missense_Mutation	SNP	T	T	A	.	.	BRCA		TCGA-BH-A18V-01A-11D-A12B-09	TCGA-BH-A18V-11A-52D-A12B-09	T	T	.	.	.	.	.	.	.	.	.	.	.	.	.	.	.	c.384T>A	p.Asp128Glu	p.D128E	ENST00000265403	1/6	296	124	171	279	279	0	UGT2B10,missense_variant,p.Asp128Glu,ENST00000265403,;UGT2B10,missense_variant,p.Asp128Glu,ENST00000458688,;RP11-468N14.1,downstream_gene_variant,,ENST00000507455,;	A	ENSG00000109181
UGT2B10	0	.	GRCh37	4	69696360	69696360	+	Missense_Mutation	SNP	T	T	A	rs755883696	.	BRCA		TCGA-D8-A13Y-01A-11D-A10Y-09	TCGA-D8-A13Y-10A-01D-A110-09	T	T	.	.	.	.	.	.	.	.	.	.	.	.	.	.	.	c.1350T>A	p.Asp450Glu	p.D450E	ENST00000265403	6/6	149	136	12	187	187	0	UGT2B10,missense_variant,p.Asp450Glu,ENST00000265403,;UGT2B10,missense_variant,p.Asp366Glu,ENST00000458688,;RP11-468N14.3,downstream_gene_variant,,ENST00000512503,;	A	ENSG00000109181
UGT2B10	0	.	GRCh37	4	69681927	69681927	+	Missense_Mutation	SNP	G	G	C	.	.	BRCA		TCGA-E2-A152-01A-11D-A12B-09	TCGA-E2-A152-10A-01D-A12B-09	G	G	.	.	.	.	.	.	.	.	.	.	.	.	.	.	.	c.190G>C	p.Asp64His	p.D64H	ENST00000265403	1/6	130	107	22	153	153	0	UGT2B10,missense_variant,p.Asp64His,ENST00000265403,;UGT2B10,missense_variant,p.Asp64His,ENST00000458688,;RP11-468N14.1,downstream_gene_variant,,ENST00000507455,;	C	ENSG00000109181
UGT2B11	0	.	GRCh37	4	70066419	70066419	+	Missense_Mutation	SNP	C	C	T	.	.	BRCA		TCGA-5L-AAT1-01A-12D-A41F-09	TCGA-5L-AAT1-10A-01D-A41F-09	C	C	.	.	.	.	.	.	.	.	.	.	.	.	.	.	.	c.1329G>A	p.Met443Ile	p.M443I	ENST00000446444	6/6	274	239	35	154	154	0	UGT2B11,missense_variant,p.Met443Ile,ENST00000446444,;RP11-704M14.1,intron_variant,,ENST00000504301,;RP11-704M14.1,intron_variant,,ENST00000505646,;UGT2B11,downstream_gene_variant,,ENST00000513315,;	T	ENSG00000213759
UGT2B11	0	.	GRCh37	4	70066072	70066072	+	3'UTR	SNP	C	C	A	rs758767361	.	BRCA		TCGA-AN-A046-01A-21W-A050-09	TCGA-AN-A046-10A-01W-A055-09	C	C	.	.	.	.	.	.	.	.	.	.	.	.	.	.	.	c.*86G>T	.	.	ENST00000446444	6/6	152	129	23	186	186	0	UGT2B11,3_prime_UTR_variant,,ENST00000446444,;RP11-704M14.1,intron_variant,,ENST00000504301,;RP11-704M14.1,upstream_gene_variant,,ENST00000505646,;UGT2B11,downstream_gene_variant,,ENST00000513315,;	A	ENSG00000213759
UGT2B11	0	.	GRCh37	4	70066083	70066083	+	3'UTR	SNP	A	A	G	novel	.	BRCA		TCGA-AN-A046-01A-21W-A050-09	TCGA-AN-A046-10A-01W-A055-09	A	A	.	.	.	.	.	.	.	.	.	.	.	.	.	.	.	c.*75T>C	.	.	ENST00000446444	6/6	211	184	27	241	241	0	UGT2B11,3_prime_UTR_variant,,ENST00000446444,;RP11-704M14.1,intron_variant,,ENST00000504301,;RP11-704M14.1,upstream_gene_variant,,ENST00000505646,;UGT2B11,downstream_gene_variant,,ENST00000513315,;	G	ENSG00000213759
UGT2B11	0	.	GRCh37	4	70070294	70070294	+	Silent	SNP	G	G	A	.	.	BRCA		TCGA-BH-A18P-01A-11D-A12B-09	TCGA-BH-A18P-11A-43D-A12B-09	G	G	.	.	.	.	.	.	.	.	.	.	.	.	.	.	.	c.1164C>T	p.%3D	p.I388I	ENST00000446444	5/6	375	335	40	409	409	0	UGT2B11,synonymous_variant,p.%3D,ENST00000446444,;RP11-704M14.1,intron_variant,,ENST00000504301,;RP11-704M14.1,intron_variant,,ENST00000505646,;UGT2B11,non_coding_transcript_exon_variant,,ENST00000513315,;	A	ENSG00000213759
UGT2B15	0	.	GRCh37	4	69533861	69533861	+	Nonsense_Mutation	SNP	C	C	T	.	.	BRCA		TCGA-A1-A0SK-01A-12D-A099-09	TCGA-A1-A0SK-10A-03D-A099-09	C	C	.	.	.	.	.	.	.	.	.	.	.	.	.	.	.	c.770G>A	p.Trp257Ter	p.W257*	ENST00000338206	2/6	136	84	51	169	169	0	UGT2B15,stop_gained,p.Trp257Ter,ENST00000338206,;	T	ENSG00000196620
UGT2B15	0	.	GRCh37	4	69519794	69519794	+	Missense_Mutation	SNP	T	T	C	rs768809300	.	BRCA		TCGA-A2-A0T0-01A-22D-A099-09	TCGA-A2-A0T0-10A-01D-A099-09	T	T	.	.	.	.	.	.	.	.	.	.	.	.	.	.	.	c.1274A>G	p.Asp425Gly	p.D425G	ENST00000338206	5/6	105	76	29	101	101	0	UGT2B15,missense_variant,p.Asp425Gly,ENST00000338206,;	C	ENSG00000196620
UGT2B15	0	.	GRCh37	4	69519778	69519778	+	Missense_Mutation	SNP	C	C	A	rs746934157	.	BRCA		TCGA-AN-A046-01A-21W-A050-09	TCGA-AN-A046-10A-01W-A055-09	C	C	.	.	.	.	.	.	.	.	.	.	.	.	.	.	.	c.1290G>T	p.Leu430Phe	p.L430F	ENST00000338206	5/6	246	200	45	346	346	0	UGT2B15,missense_variant,p.Leu430Phe,ENST00000338206,;	A	ENSG00000196620
UGT2B15	0	.	GRCh37	4	69512933	69512933	+	Silent	SNP	C	C	G	rs191582403	.	BRCA		TCGA-AO-A1KR-01A-12D-A142-09	TCGA-AO-A1KR-10A-01D-A142-09	C	C	.	.	.	.	.	.	.	.	.	.	.	.	.	.	.	c.1482G>C	p.%3D	p.V494V	ENST00000338206	6/6	55	43	11	73	73	0	UGT2B15,synonymous_variant,p.%3D,ENST00000338206,;	G	ENSG00000196620
UGT2B15	0	.	GRCh37	4	69536304	69536304	+	Silent	SNP	C	C	A	.	.	BRCA		TCGA-AR-A1AH-01A-11D-A12B-09	TCGA-AR-A1AH-10A-01D-A12B-09	C	C	.	.	.	.	.	.	.	.	.	.	.	.	.	.	.	c.33G>T	p.%3D	p.L11L	ENST00000338206	1/6	108	32	76	199	198	1	UGT2B15,synonymous_variant,p.%3D,ENST00000338206,;	A	ENSG00000196620
UGT2B15	0	.	GRCh37	4	69536210	69536210	+	Missense_Mutation	SNP	G	G	T	.	.	BRCA		TCGA-BH-A18P-01A-11D-A12B-09	TCGA-BH-A18P-11A-43D-A12B-09	G	G	.	.	.	.	.	.	.	.	.	.	.	.	.	.	.	c.127C>A	p.Leu43Met	p.L43M	ENST00000338206	1/6	181	98	82	192	192	0	UGT2B15,missense_variant,p.Leu43Met,ENST00000338206,;	T	ENSG00000196620
UGT2B17	0	.	GRCh37	4	69417578	69417578	+	Missense_Mutation	SNP	G	G	C	.	.	BRCA		TCGA-D8-A1JA-01A-11D-A13L-09	TCGA-D8-A1JA-10A-01W-A14R-09	G	G	.	.	.	.	.	.	.	.	.	.	.	.	.	.	.	c.1057C>G	p.Arg353Gly	p.R353G	ENST00000317746	4/6	69	15	54	39	39	0	UGT2B17,missense_variant,p.Arg353Gly,ENST00000317746,;	C	ENSG00000197888
UGT2B28	0	.	GRCh37	4	70160509	70160509	+	Silent	SNP	G	G	A	.	.	BRCA		TCGA-5L-AAT1-01A-12D-A41F-09	TCGA-5L-AAT1-10A-01D-A41F-09	G	G	.	.	.	.	.	.	.	.	.	.	.	.	.	.	.	c.1572G>A	p.%3D	p.K524K	ENST00000335568	6/6	209	166	43	120	120	0	UGT2B28,synonymous_variant,p.%3D,ENST00000335568,;UGT2B28,3_prime_UTR_variant,,ENST00000511240,;	A	ENSG00000135226
UGT2B28	0	.	GRCh37	4	70152547	70152547	+	Missense_Mutation	SNP	G	G	A	.	.	BRCA		TCGA-A2-A0CR-01A-11D-A228-09	TCGA-A2-A0CR-10A-01D-A22A-09	G	G	.	.	.	.	.	.	.	.	.	.	.	.	.	.	.	c.948G>A	p.Met316Ile	p.M316I	ENST00000335568	3/6	149	133	16	98	98	0	UGT2B28,missense_variant,p.Met316Ile,ENST00000511240,;UGT2B28,missense_variant,p.Met316Ile,ENST00000335568,;	A	ENSG00000135226
UGT2B28	0	.	GRCh37	4	70146552	70146552	+	Missense_Mutation	SNP	G	G	C	.	.	BRCA		TCGA-C8-A1HK-01A-21D-A13L-09	TCGA-C8-A1HK-10A-01D-A13O-09	G	G	.	.	.	.	.	.	.	.	.	.	.	.	.	.	.	c.334G>C	p.Glu112Gln	p.E112Q	ENST00000335568	1/6	196	155	40	77	77	0	UGT2B28,missense_variant,p.Glu112Gln,ENST00000511240,;UGT2B28,missense_variant,p.Glu112Gln,ENST00000335568,;	C	ENSG00000135226
UGT2B28	0	.	GRCh37	4	70160694	70160694	+	3'UTR	SNP	C	C	G	novel	.	BRCA		TCGA-D8-A1JD-01A-11D-A13L-09	TCGA-D8-A1JD-10A-01D-A13O-09	C	C	.	.	.	.	.	.	.	.	.	.	.	.	.	.	.	c.*167C>G	.	.	ENST00000335568	6/6	34	30	4	63	63	0	UGT2B28,3_prime_UTR_variant,,ENST00000511240,;UGT2B28,3_prime_UTR_variant,,ENST00000335568,;	G	ENSG00000135226
UGT2B28	0	.	GRCh37	4	70156383	70156383	+	Silent	SNP	C	C	T	novel	.	BRCA		TCGA-E2-A1B0-01A-11D-A12Q-09	TCGA-E2-A1B0-10A-01D-A12Q-09	C	C	.	.	.	.	.	.	.	.	.	.	.	.	.	.	.	c.1164C>T	p.%3D	p.I388I	ENST00000335568	5/6	216	205	10	332	332	0	UGT2B28,synonymous_variant,p.%3D,ENST00000335568,;UGT2B28,intron_variant,,ENST00000511240,;	T	ENSG00000135226
UGT2B4	0	.	GRCh37	4	70351053	70351053	+	Silent	SNP	A	A	G	.	.	BRCA		TCGA-A2-A3Y0-01A-11D-A23C-09	TCGA-A2-A3Y0-10A-01D-A23C-09	A	A	.	.	.	.	.	.	.	.	.	.	.	.	.	.	.	c.1183T>C	p.%3D	p.L395L	ENST00000305107	5/6	194	160	34	121	121	0	UGT2B4,synonymous_variant,p.%3D,ENST00000305107,;UGT2B4,synonymous_variant,p.%3D,ENST00000381096,;UGT2B4,intron_variant,,ENST00000512583,;UGT2B4,non_coding_transcript_exon_variant,,ENST00000502655,;UGT2B4,intron_variant,,ENST00000506580,;UGT2B4,downstream_gene_variant,,ENST00000503836,;	G	ENSG00000156096
UGT2B4	0	.	GRCh37	4	70360966	70360966	+	Missense_Mutation	SNP	A	A	G	rs750636266	.	BRCA		TCGA-AN-A0AK-01A-21W-A019-09	TCGA-AN-A0AK-10A-01W-A021-09	A	A	.	.	.	.	.	.	.	.	.	.	.	.	.	.	.	c.614T>C	p.Met205Thr	p.M205T	ENST00000305107	1/6	216	183	32	165	165	0	UGT2B4,missense_variant,p.Met205Thr,ENST00000305107,;UGT2B4,missense_variant,p.Met205Thr,ENST00000512583,;UGT2B4,missense_variant,p.Met69Thr,ENST00000381096,;UGT2B4,downstream_gene_variant,,ENST00000510114,;UGT2B4,non_coding_transcript_exon_variant,,ENST00000502655,;UGT2B4,intron_variant,,ENST00000506580,;UGT2B4,intron_variant,,ENST00000503836,;	G	ENSG00000156096
UGT2B4	0	.	GRCh37	4	70346610	70346610	+	Missense_Mutation	SNP	C	C	G	.	.	BRCA		TCGA-BH-A0DZ-01A-11W-A019-09	TCGA-BH-A0DZ-10A-01W-A021-09	C	C	.	.	.	.	.	.	.	.	.	.	.	.	.	.	.	c.1329G>C	p.Met443Ile	p.M443I	ENST00000305107	6/6	302	217	84	190	190	0	UGT2B4,stop_lost,p.Ter370SerextTer11,ENST00000512583,;UGT2B4,missense_variant,p.Met443Ile,ENST00000305107,;UGT2B4,missense_variant,p.Met307Ile,ENST00000381096,;AC108078.1,downstream_gene_variant,,ENST00000583573,;UGT2B4,non_coding_transcript_exon_variant,,ENST00000506580,;UGT2B4,downstream_gene_variant,,ENST00000502655,;	G	ENSG00000156096
UGT2B4	0	.	GRCh37	4	70350946	70350946	+	Silent	SNP	C	C	T	.	.	BRCA		TCGA-BH-A0HA-01A-11D-A12Q-09	TCGA-BH-A0HA-11A-31D-A12Q-09	C	C	.	.	.	.	.	.	.	.	.	.	.	.	.	.	.	c.1290G>A	p.%3D	p.K430K	ENST00000305107	5/6	417	268	149	382	382	0	UGT2B4,synonymous_variant,p.%3D,ENST00000305107,;UGT2B4,synonymous_variant,p.%3D,ENST00000381096,;UGT2B4,intron_variant,,ENST00000512583,;UGT2B4,non_coding_transcript_exon_variant,,ENST00000502655,;UGT2B4,intron_variant,,ENST00000506580,;UGT2B4,downstream_gene_variant,,ENST00000503836,;	T	ENSG00000156096
UGT2B4	0	.	GRCh37	4	70346363	70346363	+	Missense_Mutation	SNP	T	T	C	novel	.	BRCA		TCGA-BH-AB28-01A-31D-A41F-09	TCGA-BH-AB28-10A-01D-A41F-09	T	T	.	.	.	.	.	.	.	.	.	.	.	.	.	.	.	c.1576A>G	p.Lys526Glu	p.K526E	ENST00000305107	6/6	132	94	37	50	50	0	UGT2B4,missense_variant,p.Lys526Glu,ENST00000305107,;UGT2B4,missense_variant,p.Lys390Glu,ENST00000381096,;UGT2B4,3_prime_UTR_variant,,ENST00000512583,;AC108078.1,downstream_gene_variant,,ENST00000583573,;UGT2B4,non_coding_transcript_exon_variant,,ENST00000506580,;UGT2B4,downstream_gene_variant,,ENST00000502655,;	C	ENSG00000156096
UGT2B4	0	.	GRCh37	4	70346546	70346546	+	Nonsense_Mutation	SNP	C	C	A	.	.	BRCA		TCGA-D8-A1X9-01A-12D-A159-09	TCGA-D8-A1X9-10A-01D-A17G-09	C	C	.	.	.	.	.	.	.	.	.	.	.	.	.	.	.	c.1393G>T	p.Glu465Ter	p.E465*	ENST00000305107	6/6	51	32	19	56	56	0	UGT2B4,stop_gained,p.Glu465Ter,ENST00000305107,;UGT2B4,stop_gained,p.Glu329Ter,ENST00000381096,;UGT2B4,3_prime_UTR_variant,,ENST00000512583,;AC108078.1,downstream_gene_variant,,ENST00000583573,;UGT2B4,non_coding_transcript_exon_variant,,ENST00000506580,;UGT2B4,downstream_gene_variant,,ENST00000502655,;	A	ENSG00000156096
UGT2B7	0	.	GRCh37	4	69978529	69978529	+	3'UTR	SNP	A	A	G	novel	.	BRCA		TCGA-A2-A0YL-01A-21D-A10G-09	TCGA-A2-A0YL-10A-01D-A10G-09	A	A	.	.	.	.	.	.	.	.	.	.	.	.	.	.	.	c.*75A>G	.	.	ENST00000305231	6/6	109	94	15	77	77	0	UGT2B7,3_prime_UTR_variant,,ENST00000305231,;UGT2B7,3_prime_UTR_variant,,ENST00000508661,;UGT2B7,downstream_gene_variant,,ENST00000502942,;UGT2B7,downstream_gene_variant,,ENST00000509763,;	G	ENSG00000171234
UGT2B7	0	.	GRCh37	4	69973931	69973931	+	Missense_Mutation	SNP	G	G	C	rs138302870	.	BRCA		TCGA-A2-A25E-01A-11D-A167-09	TCGA-A2-A25E-10A-01D-A167-09	G	G	.	.	.	.	.	.	.	.	.	.	.	.	.	.	.	c.1201G>C	p.Asp401His	p.D401H	ENST00000305231	5/6	115	73	41	77	77	0	UGT2B7,missense_variant,p.Asp401His,ENST00000305231,;UGT2B7,missense_variant,p.Asp152His,ENST00000502942,;UGT2B7,intron_variant,,ENST00000508661,;UGT2B7,intron_variant,,ENST00000509763,;	C	ENSG00000171234
UGT2B7	0	.	GRCh37	4	69973882	69973882	+	Silent	SNP	C	C	T	rs200100430	.	BRCA		TCGA-A8-A08B-01A-11W-A019-09	TCGA-A8-A08B-10A-01W-A021-09	C	C	.	.	.	.	.	.	.	.	.	.	.	.	.	.	.	c.1152C>T	p.%3D	p.I384I	ENST00000305231	5/6	166	141	25	276	276	0	UGT2B7,synonymous_variant,p.%3D,ENST00000305231,;UGT2B7,synonymous_variant,p.%3D,ENST00000502942,;UGT2B7,intron_variant,,ENST00000508661,;UGT2B7,intron_variant,,ENST00000509763,;	T	ENSG00000171234
UGT2B7	0	.	GRCh37	4	69962845	69962845	+	Missense_Mutation	SNP	G	G	A	.	.	BRCA		TCGA-AC-A23H-01A-11D-A159-09	TCGA-AC-A23H-11A-12D-A17G-09	G	G	.	.	.	.	.	.	.	.	.	.	.	.	.	.	.	c.607G>A	p.Asp203Asn	p.D203N	ENST00000305231	1/6	138	108	29	149	149	0	UGT2B7,missense_variant,p.Asp203Asn,ENST00000305231,;UGT2B7,missense_variant,p.Asp203Asn,ENST00000508661,;UGT2B7,intron_variant,,ENST00000502942,;UGT2B7,intron_variant,,ENST00000509763,;	A	ENSG00000171234
UGT2B7	0	.	GRCh37	4	69968644	69968644	+	Missense_Mutation	SNP	G	G	T	rs564691451	.	BRCA		TCGA-AC-A23H-01A-11D-A159-09	TCGA-AC-A23H-11A-12D-A17G-09	G	G	.	.	.	.	.	.	.	.	.	.	.	.	.	.	.	c.990G>T	p.Gln330His	p.Q330H	ENST00000305231	3/6	154	87	67	218	218	0	UGT2B7,missense_variant,p.Gln330His,ENST00000305231,;UGT2B7,missense_variant,p.Gln330His,ENST00000508661,;UGT2B7,missense_variant,p.Gln81His,ENST00000502942,;UGT2B7,non_coding_transcript_exon_variant,,ENST00000509763,;	T	ENSG00000171234
UGT2B7	0	.	GRCh37	4	69978489	69978489	+	3'UTR	SNP	G	G	T	novel	.	BRCA		TCGA-BH-A0EE-01A-11W-A050-09	TCGA-BH-A0EE-10A-01W-A055-09	G	G	.	.	.	.	.	.	.	.	.	.	.	.	.	.	.	c.*35G>T	.	.	ENST00000305231	6/6	119	76	42	123	123	0	UGT2B7,3_prime_UTR_variant,,ENST00000305231,;UGT2B7,3_prime_UTR_variant,,ENST00000508661,;UGT2B7,downstream_gene_variant,,ENST00000502942,;UGT2B7,downstream_gene_variant,,ENST00000509763,;	T	ENSG00000171234
UGT2B7	0	.	GRCh37	4	69962480	69962480	+	Missense_Mutation	SNP	T	T	C	.	.	BRCA		TCGA-BH-A18G-01A-11D-A12B-09	TCGA-BH-A18G-10A-01D-A12B-09	T	T	.	.	.	.	.	.	.	.	.	.	.	.	.	.	.	c.242T>C	p.Leu81Ser	p.L81S	ENST00000305231	1/6	175	106	69	170	170	0	UGT2B7,missense_variant,p.Leu81Ser,ENST00000305231,;UGT2B7,missense_variant,p.Leu81Ser,ENST00000508661,;UGT2B7,intron_variant,,ENST00000502942,;UGT2B7,intron_variant,,ENST00000509763,;	C	ENSG00000171234
UGT3A1	0	.	GRCh37	5	35965740	35965740	+	Silent	SNP	G	G	A	novel	.	BRCA		TCGA-A2-A0EQ-01A-11W-A050-09	TCGA-A2-A0EQ-10A-01W-A055-09	G	G	.	.	.	.	.	.	.	.	.	.	.	.	.	.	.	c.591C>T	p.%3D	p.F197F	ENST00000274278	4/7	464	444	19	252	252	0	UGT3A1,synonymous_variant,p.%3D,ENST00000274278,;UGT3A1,synonymous_variant,p.%3D,ENST00000507113,;UGT3A1,synonymous_variant,p.%3D,ENST00000333811,;UGT3A1,synonymous_variant,p.%3D,ENST00000503189,;UGT3A1,intron_variant,,ENST00000513233,;UGT3A1,3_prime_UTR_variant,,ENST00000515801,;	A	ENSG00000145626
UGT3A1	0	.	GRCh37	5	35955951	35955951	+	Missense_Mutation	SNP	C	C	T	rs149057248	.	BRCA		TCGA-A8-A08R-01A-11W-A050-09	TCGA-A8-A08R-10A-01W-A055-09	C	C	.	.	.	.	.	.	.	.	.	.	.	.	.	.	.	c.1091G>A	p.Arg364His	p.R364H	ENST00000274278	6/7	213	190	23	211	211	0	UGT3A1,missense_variant,p.Arg364His,ENST00000274278,;UGT3A1,missense_variant,p.Arg330His,ENST00000507113,;UGT3A1,missense_variant,p.Arg364His,ENST00000503189,;UGT3A1,downstream_gene_variant,,ENST00000333811,;UGT3A1,non_coding_transcript_exon_variant,,ENST00000513233,;UGT3A1,3_prime_UTR_variant,,ENST00000515801,;	T	ENSG00000145626
UGT3A1	0	.	GRCh37	5	35954113	35954114	+	3'UTR	INS	-	-	A	novel	.	BRCA		TCGA-A8-A09Z-01A-11W-A019-09	TCGA-A8-A09Z-10A-01W-A021-09	-	-	.	.	.	.	.	.	.	.	.	.	.	.	.	.	.	c.*190dupT	.	.	ENST00000274278	7/7	27	20	7	25	25	0	UGT3A1,3_prime_UTR_variant,,ENST00000274278,;UGT3A1,downstream_gene_variant,,ENST00000507113,;UGT3A1,downstream_gene_variant,,ENST00000503189,;UGT3A1,downstream_gene_variant,,ENST00000513233,;UGT3A1,3_prime_UTR_variant,,ENST00000515801,;	A	ENSG00000145626
UGT3A1	0	.	GRCh37	5	35955790	35955790	+	Missense_Mutation	SNP	C	C	T	rs147780586	.	BRCA		TCGA-BH-A0HA-01A-11D-A12Q-09	TCGA-BH-A0HA-11A-31D-A12Q-09	C	C	.	.	.	.	.	.	.	.	.	.	.	.	.	.	.	c.1252G>A	p.Asp418Asn	p.D418N	ENST00000274278	6/7	354	284	69	300	299	0	UGT3A1,missense_variant,p.Asp418Asn,ENST00000274278,;UGT3A1,missense_variant,p.Asp384Asn,ENST00000507113,;UGT3A1,missense_variant,p.Asp418Asn,ENST00000503189,;UGT3A1,downstream_gene_variant,,ENST00000513233,;UGT3A1,3_prime_UTR_variant,,ENST00000515801,;	T	ENSG00000145626
UGT3A1	0	.	GRCh37	5	35955644	35955644	+	Intron	SNP	C	C	T	novel	.	BRCA		TCGA-BH-A1F8-01A-11D-A13L-09	TCGA-BH-A1F8-11B-21D-A188-09	C	C	.	.	.	.	.	.	.	.	.	.	.	.	.	.	.	c.1295+103G>A	.	.	ENST00000274278	.	55	44	11	17	17	0	UGT3A1,3_prime_UTR_variant,,ENST00000507113,;UGT3A1,3_prime_UTR_variant,,ENST00000503189,;UGT3A1,intron_variant,,ENST00000274278,;UGT3A1,downstream_gene_variant,,ENST00000513233,;UGT3A1,3_prime_UTR_variant,,ENST00000515801,;	T	ENSG00000145626
UGT3A1	0	.	GRCh37	5	35954396	35954396	+	Missense_Mutation	SNP	C	C	T	rs755225814	.	BRCA		TCGA-BH-A1FJ-01A-11D-A13L-09	TCGA-BH-A1FJ-11B-42D-A188-09	C	C	.	.	.	.	.	.	.	.	.	.	.	.	.	.	.	c.1480G>A	p.Gly494Arg	p.G494R	ENST00000274278	7/7	138	66	72	30	29	1	UGT3A1,missense_variant,p.Gly494Arg,ENST00000274278,;UGT3A1,downstream_gene_variant,,ENST00000507113,;UGT3A1,downstream_gene_variant,,ENST00000503189,;UGT3A1,downstream_gene_variant,,ENST00000513233,;UGT3A1,3_prime_UTR_variant,,ENST00000515801,;	T	ENSG00000145626
UGT3A1	0	.	GRCh37	5	35954534	35954534	+	Missense_Mutation	SNP	G	G	A	novel	.	BRCA		TCGA-C8-A274-01A-11D-A16D-09	TCGA-C8-A274-10A-01D-A16D-09	G	G	.	.	.	.	.	.	.	.	.	.	.	.	.	.	.	c.1342C>T	p.Pro448Ser	p.P448S	ENST00000274278	7/7	31	27	4	23	23	0	UGT3A1,missense_variant,p.Pro448Ser,ENST00000274278,;UGT3A1,downstream_gene_variant,,ENST00000507113,;UGT3A1,downstream_gene_variant,,ENST00000503189,;UGT3A1,downstream_gene_variant,,ENST00000513233,;UGT3A1,3_prime_UTR_variant,,ENST00000515801,;	A	ENSG00000145626
UGT3A2	0	.	GRCh37	5	36049512	36049512	+	Missense_Mutation	SNP	C	C	T	novel	.	BRCA		TCGA-5L-AAT0-01A-12D-A41F-09	TCGA-5L-AAT0-10A-01D-A41F-09	C	C	.	.	.	.	.	.	.	.	.	.	.	.	.	.	.	c.322G>A	p.Glu108Lys	p.E108K	ENST00000282507	4/7	76	64	12	38	38	0	UGT3A2,missense_variant,p.Glu74Lys,ENST00000513300,;UGT3A2,missense_variant,p.Glu108Lys,ENST00000515131,;UGT3A2,missense_variant,p.Glu108Lys,ENST00000282507,;UGT3A2,intron_variant,,ENST00000545528,;UGT3A2,intron_variant,,ENST00000504954,;UGT3A2,intron_variant,,ENST00000504685,;	T	ENSG00000168671
UGT3A2	0	.	GRCh37	5	36035966	36035966	+	Missense_Mutation	SNP	G	G	A	rs199567567	.	BRCA		TCGA-B6-A1KF-01A-11D-A13L-09	TCGA-B6-A1KF-10A-01W-A14R-09	G	G	.	.	.	.	.	.	.	.	.	.	.	.	.	.	.	c.1406C>T	p.Thr469Met	p.T469M	ENST00000282507	7/7	106	85	20	53	53	0	UGT3A2,missense_variant,p.Thr435Met,ENST00000513300,;UGT3A2,missense_variant,p.Thr167Met,ENST00000545528,;UGT3A2,missense_variant,p.Thr469Met,ENST00000282507,;UGT3A2,downstream_gene_variant,,ENST00000504954,;UGT3A2,3_prime_UTR_variant,,ENST00000504685,;	A	ENSG00000168671
UGT3A2	0	.	GRCh37	5	36049116	36049116	+	Missense_Mutation	SNP	G	G	A	.	.	BRCA		TCGA-BH-A0B6-01A-11D-A19Y-09	TCGA-BH-A0B6-10A-01D-A19Y-09	G	G	.	.	.	.	.	.	.	.	.	.	.	.	.	.	.	c.718C>T	p.Leu240Phe	p.L240F	ENST00000282507	4/7	105	76	29	61	61	0	UGT3A2,missense_variant,p.Leu206Phe,ENST00000513300,;UGT3A2,missense_variant,p.Leu240Phe,ENST00000282507,;UGT3A2,intron_variant,,ENST00000545528,;UGT3A2,downstream_gene_variant,,ENST00000515131,;UGT3A2,intron_variant,,ENST00000504954,;UGT3A2,intron_variant,,ENST00000504685,;	A	ENSG00000168671
UGT3A2	0	.	GRCh37	5	36035878	36035878	+	Frame_Shift_Del	DEL	C	C	-	novel	.	BRCA		TCGA-D8-A27V-01A-12D-A17D-09	TCGA-D8-A27V-10A-01D-A17D-09	C	C	.	.	.	.	.	.	.	.	.	.	.	.	.	.	.	c.1494delG	p.Thr499LeufsTer22	p.T499Lfs*22	ENST00000282507	7/7	165	151	14	50	50	0	UGT3A2,frameshift_variant,p.Thr465LeufsTer22,ENST00000513300,;UGT3A2,frameshift_variant,p.Thr197LeufsTer22,ENST00000545528,;UGT3A2,frameshift_variant,p.Thr499LeufsTer22,ENST00000282507,;UGT3A2,downstream_gene_variant,,ENST00000504954,;UGT3A2,3_prime_UTR_variant,,ENST00000504685,;	-	ENSG00000168671
UGT3A2	0	.	GRCh37	5	36066903	36066903	+	5'UTR	SNP	C	C	G	novel	.	BRCA		TCGA-E2-A1LG-01A-21D-A14K-09	TCGA-E2-A1LG-11A-42D-A14K-09	C	C	.	.	.	.	.	.	.	.	.	.	.	.	.	.	.	c.-12G>C	.	.	ENST00000282507	1/7	110	90	20	101	101	0	UGT3A2,5_prime_UTR_variant,,ENST00000513300,;UGT3A2,5_prime_UTR_variant,,ENST00000545528,;UGT3A2,5_prime_UTR_variant,,ENST00000515131,;UGT3A2,5_prime_UTR_variant,,ENST00000282507,;UGT3A2,intron_variant,,ENST00000504954,;UGT3A2,5_prime_UTR_variant,,ENST00000504685,;CTD-2197M16.1,downstream_gene_variant,,ENST00000505367,;	G	ENSG00000168671
UGT3A2	0	.	GRCh37	5	36049459	36049460	+	Frame_Shift_Ins	INS	-	-	A	novel	.	BRCA		TCGA-E9-A54Y-01A-11D-A25Q-09	TCGA-E9-A54Y-10A-01D-A25Q-09	-	-	.	.	.	.	.	.	.	.	.	.	.	.	.	.	.	c.374dupT	p.Leu125PhefsTer3	p.L125Ffs*3	ENST00000282507	4/7	43	33	10	46	46	0	UGT3A2,frameshift_variant,p.Leu91PhefsTer3,ENST00000513300,;UGT3A2,frameshift_variant,p.Leu125PhefsTer3,ENST00000515131,;UGT3A2,frameshift_variant,p.Leu125PhefsTer3,ENST00000282507,;UGT3A2,intron_variant,,ENST00000545528,;UGT3A2,intron_variant,,ENST00000504954,;UGT3A2,intron_variant,,ENST00000504685,;	A	ENSG00000168671
UGT8	0	.	GRCh37	4	115597718	115597718	+	3'UTR	SNP	G	G	C	novel	.	BRCA		TCGA-3C-AALI-01A-11D-A41F-09	TCGA-3C-AALI-10A-01D-A41F-09	G	G	.	.	.	.	.	.	.	.	.	.	.	.	.	.	.	c.*274G>C	.	.	ENST00000310836	6/6	45	35	9	28	28	0	UGT8,3_prime_UTR_variant,,ENST00000310836,;UGT8,3_prime_UTR_variant,,ENST00000394511,;	C	ENSG00000174607
UGT8	0	.	GRCh37	4	115543939	115543939	+	Intron	SNP	G	G	A	novel	.	BRCA		TCGA-A2-A3Y0-01A-11D-A23C-09	TCGA-A2-A3Y0-10A-01D-A23C-09	G	G	.	.	.	.	.	.	.	.	.	.	.	.	.	.	.	c.-2-96G>A	.	.	ENST00000310836	.	28	17	10	32	32	0	UGT8,5_prime_UTR_variant,,ENST00000394511,;UGT8,intron_variant,,ENST00000507710,;UGT8,intron_variant,,ENST00000310836,;	A	ENSG00000174607
UGT8	0	.	GRCh37	4	115544064	115544064	+	Missense_Mutation	SNP	C	C	G	.	.	BRCA		TCGA-AC-A23H-01A-11D-A159-09	TCGA-AC-A23H-11A-12D-A17G-09	C	C	.	.	.	.	.	.	.	.	.	.	.	.	.	.	.	c.28C>G	p.Leu10Val	p.L10V	ENST00000310836	2/6	76	60	15	77	77	0	UGT8,missense_variant,p.Leu10Val,ENST00000507710,;UGT8,missense_variant,p.Leu10Val,ENST00000310836,;UGT8,missense_variant,p.Leu10Val,ENST00000394511,;	G	ENSG00000174607
UGT8	0	.	GRCh37	4	115544204	115544204	+	Silent	SNP	C	C	G	.	.	BRCA		TCGA-AC-A23H-01A-11D-A159-09	TCGA-AC-A23H-11A-12D-A17G-09	C	C	.	.	.	.	.	.	.	.	.	.	.	.	.	.	.	c.168C>G	p.%3D	p.L56L	ENST00000310836	2/6	106	79	27	100	100	0	UGT8,synonymous_variant,p.%3D,ENST00000507710,;UGT8,synonymous_variant,p.%3D,ENST00000310836,;UGT8,synonymous_variant,p.%3D,ENST00000394511,;	G	ENSG00000174607
UGT8	0	.	GRCh37	4	115544340	115544340	+	Missense_Mutation	SNP	G	G	A	.	.	BRCA		TCGA-AN-A046-01A-21W-A050-09	TCGA-AN-A046-10A-01W-A055-09	G	G	.	.	.	.	.	.	.	.	.	.	.	.	.	.	.	c.304G>A	p.Glu102Lys	p.E102K	ENST00000310836	2/6	141	115	25	158	158	0	UGT8,missense_variant,p.Glu102Lys,ENST00000507710,;UGT8,missense_variant,p.Glu102Lys,ENST00000310836,;UGT8,missense_variant,p.Glu102Lys,ENST00000394511,;	A	ENSG00000174607
UGT8	0	.	GRCh37	4	115597145	115597145	+	Nonsense_Mutation	SNP	C	C	T	.	.	BRCA		TCGA-AN-A046-01A-21W-A050-09	TCGA-AN-A046-10A-01W-A055-09	C	C	.	.	.	.	.	.	.	.	.	.	.	.	.	.	.	c.1327C>T	p.Arg443Ter	p.R443*	ENST00000310836	6/6	116	106	10	172	171	1	UGT8,stop_gained,p.Arg443Ter,ENST00000310836,;UGT8,stop_gained,p.Arg443Ter,ENST00000394511,;	T	ENSG00000174607
UGT8	0	.	GRCh37	4	115597146	115597146	+	Missense_Mutation	SNP	G	G	A	.	.	BRCA		TCGA-AN-A046-01A-21W-A050-09	TCGA-AN-A046-10A-01W-A055-09	G	G	.	.	.	.	.	.	.	.	.	.	.	.	.	.	.	c.1328G>A	p.Arg443Gln	p.R443Q	ENST00000310836	6/6	128	108	20	183	183	0	UGT8,missense_variant,p.Arg443Gln,ENST00000310836,;UGT8,missense_variant,p.Arg443Gln,ENST00000394511,;	A	ENSG00000174607
UGT8	0	.	GRCh37	4	115597084	115597084	+	Silent	SNP	C	C	T	novel	.	BRCA		TCGA-AN-A0AK-01A-21W-A019-09	TCGA-AN-A0AK-10A-01W-A021-09	C	C	.	.	.	.	.	.	.	.	.	.	.	.	.	.	.	c.1266C>T	p.%3D	p.Y422Y	ENST00000310836	6/6	247	238	9	202	202	0	UGT8,synonymous_variant,p.%3D,ENST00000310836,;UGT8,synonymous_variant,p.%3D,ENST00000394511,;	T	ENSG00000174607
UGT8	0	.	GRCh37	4	115544067	115544067	+	Silent	SNP	C	C	T	.	.	BRCA		TCGA-B6-A0I9-01A-11W-A050-09	TCGA-B6-A0I9-10A-01W-A055-09	C	C	.	.	.	.	.	.	.	.	.	.	.	.	.	.	.	c.31C>T	p.%3D	p.L11L	ENST00000310836	2/6	84	63	21	75	75	0	UGT8,synonymous_variant,p.%3D,ENST00000507710,;UGT8,synonymous_variant,p.%3D,ENST00000310836,;UGT8,synonymous_variant,p.%3D,ENST00000394511,;	T	ENSG00000174607
UGT8	0	.	GRCh37	4	115586882	115586883	+	Frame_Shift_Del	DEL	AT	AT	-	.	.	BRCA		TCGA-D8-A1XY-01A-11D-A14K-09	TCGA-D8-A1XY-10A-01D-A14K-09	AT	AT	.	.	.	.	.	.	.	.	.	.	.	.	.	.	.	c.1013_1014delTA	p.Ile338ArgfsTer7	p.I338Rfs*7	ENST00000310836	4/6	186	144	42	153	153	0	UGT8,frameshift_variant,p.Ile338ArgfsTer7,ENST00000310836,;UGT8,frameshift_variant,p.Ile338ArgfsTer7,ENST00000394511,;	-	ENSG00000174607
UGT8	0	.	GRCh37	4	115586898	115586898	+	Missense_Mutation	SNP	A	A	C	novel	.	BRCA		TCGA-E9-A1N3-01A-12D-A159-09	TCGA-E9-A1N3-10A-01D-A159-09	A	A	.	.	.	.	.	.	.	.	.	.	.	.	.	.	.	c.1028A>C	p.Gln343Pro	p.Q343P	ENST00000310836	4/6	85	78	7	69	69	0	UGT8,missense_variant,p.Gln343Pro,ENST00000310836,;UGT8,missense_variant,p.Gln343Pro,ENST00000394511,;	C	ENSG00000174607
UGT8	0	.	GRCh37	4	115589432	115589432	+	Missense_Mutation	SNP	G	G	T	novel	.	BRCA		TCGA-GM-A2DC-01A-11D-A18P-09	TCGA-GM-A2DC-10C-01D-A18P-09	G	G	.	.	.	.	.	.	.	.	.	.	.	.	.	.	.	c.1234G>T	p.Ala412Ser	p.A412S	ENST00000310836	5/6	40	37	3	34	34	0	UGT8,missense_variant,p.Ala412Ser,ENST00000310836,;UGT8,missense_variant,p.Ala412Ser,ENST00000394511,;	T	ENSG00000174607
UGT8	0	.	GRCh37	4	115585277	115585277	+	Nonsense_Mutation	SNP	C	C	T	novel	.	BRCA		TCGA-GM-A2DO-01A-11D-A19Y-09	TCGA-GM-A2DO-10D-01D-A18P-09	C	C	.	.	.	.	.	.	.	.	.	.	.	.	.	.	.	c.949C>T	p.Gln317Ter	p.Q317*	ENST00000310836	3/6	51	46	5	71	71	0	UGT8,stop_gained,p.Gln317Ter,ENST00000310836,;UGT8,stop_gained,p.Gln317Ter,ENST00000394511,;	T	ENSG00000174607
[truncated: 66 more columns]

## Sheet: CESC
Hugo_Symbol	Entrez_Gene_Id	Center	NCBI_Build	Chromosome	Start_Position	End_Position	Strand	Variant_Classification	Variant_Type	Reference_Allele	Tumor_Seq_Allele1	Tumor_Seq_Allele2	dbSNP_RS	dbSNP_Val_Status	Cancer type		Tumor_Sample_Barcode	Matched_Norm_Sample_Barcode	Match_Norm_Seq_Allele1	Match_Norm_Seq_Allele2	Tumor_Validation_Allele1	Tumor_Validation_Allele2	Match_Norm_Validation_Allele1	Match_Norm_Validation_Allele2	Verification_Status	Validation_Status	Mutation_Status	Sequencing_Phase	Sequence_Source	Validation_Method	Score	BAM_File	Sequencer	Tumor_Sample_UUID	Matched_Norm_Sample_UUID	HGVSc	HGVSp	HGVSp_Short	Transcript_ID	Exon_Number	t_depth	t_ref_count	t_alt_count	n_depth	n_ref_count	n_alt_count	all_effects	Allele	Gene
UGT1A10	0	.	GRCh37	2	234545342	234545342	+	Silent	SNP	C	C	T	.	.	CESC		TCGA-FU-A5XV-01A-11D-A28B-09	TCGA-FU-A5XV-10A-01D-A28E-09	C	C	.	.	.	.	.	.	.	.	.	.	.	.	.	.	.	c.174C>T	p.%3D	p.V58V	ENST00000344644	1/5	149	96	52	104	104	0	UGT1A10,synonymous_variant,p.%3D,ENST00000373445,;UGT1A10,synonymous_variant,p.%3D,ENST00000344644,;UGT1A8,intron_variant,,ENST00000373450,;	T	ENSG00000242515
UGT1A10	0	.	GRCh37	2	234676989	234676989	+	Missense_Mutation	SNP	G	G	A	rs140613392	.	CESC		TCGA-2W-A8YY-01A-11D-A37N-09	TCGA-2W-A8YY-10A-01D-A37N-09	G	G	.	.	.	.	.	.	.	.	.	.	.	.	.	.	.	c.1199G>A	p.Arg400His	p.R400H	ENST00000344644	4/5	47	30	16	50	50	0	UGT1A10,missense_variant,p.Arg400His,ENST00000373445,;UGT1A4,missense_variant,p.Arg404His,ENST00000373409,;UGT1A6,missense_variant,p.Arg402His,ENST00000305139,;UGT1A3,missense_variant,p.Arg404His,ENST00000482026,;UGT1A6,missense_variant,p.Arg135His,ENST00000373424,;UGT1A8,missense_variant,p.Arg403His,ENST00000608383,;UGT1A8,missense_variant,p.Arg404His,ENST00000608381,;UGT1A7,missense_variant,p.A…	A	ENSG00000242515
UGT1A10	0	.	GRCh37	2	234545585	234545585	+	Silent	SNP	G	G	A	rs769021073	.	CESC		TCGA-VS-A9UH-01A-11D-A42O-09	TCGA-VS-A9UH-10A-01D-A42R-09	G	G	.	.	.	.	.	.	.	.	.	.	.	.	.	.	.	c.417G>A	p.%3D	p.E139E	ENST00000344644	1/5	57	48	8	68	68	0	UGT1A10,synonymous_variant,p.%3D,ENST00000373445,;UGT1A10,synonymous_variant,p.%3D,ENST00000344644,;UGT1A8,intron_variant,,ENST00000373450,;	A	ENSG00000242515
UGT1A4	0	.	GRCh37	2	234628184	234628184	+	Missense_Mutation	SNP	C	C	G	novel	.	CESC		TCGA-C5-A1BI-01B-11D-A13W-08	TCGA-C5-A1BI-10A-01D-A13W-08	C	C	.	.	.	.	.	.	.	.	.	.	.	.	.	.	.	c.718C>G	p.Gln240Glu	p.Q240E	ENST00000373409	1/5	261	225	36	350	349	0	UGT1A4,missense_variant,p.Gln240Glu,ENST00000373409,;UGT1A10,intron_variant,,ENST00000373445,;UGT1A6,intron_variant,,ENST00000305139,;UGT1A6,intron_variant,,ENST00000373424,;UGT1A8,intron_variant,,ENST00000608381,;UGT1A7,intron_variant,,ENST00000373426,;UGT1A8,intron_variant,,ENST00000609637,;UGT1A5,intron_variant,,ENST00000373414,;UGT1A6,intron_variant,,ENST00000406651,;UGT1A10,intron_variant,,E…	G	ENSG00000244474
UGT1A5	0	.	GRCh37	2	234621810	234621810	+	Missense_Mutation	SNP	T	T	C	rs577803036	.	CESC		TCGA-2W-A8YY-01A-11D-A37N-09	TCGA-2W-A8YY-10A-01D-A37N-09	T	T	.	.	.	.	.	.	.	.	.	.	.	.	.	.	.	c.173T>C	p.Val58Ala	p.V58A	ENST00000373414	1/5	39	18	20	31	31	0	UGT1A8,missense_variant,p.Val58Ala,ENST00000608381,;UGT1A5,missense_variant,p.Val58Ala,ENST00000373414,;UGT1A10,intron_variant,,ENST00000373445,;UGT1A6,intron_variant,,ENST00000305139,;UGT1A6,intron_variant,,ENST00000373424,;UGT1A7,intron_variant,,ENST00000373426,;UGT1A8,intron_variant,,ENST00000609637,;UGT1A6,intron_variant,,ENST00000406651,;UGT1A10,intron_variant,,ENST00000344644,;UGT1A8,intron…	C	ENSG00000240224
UGT1A5	0	.	GRCh37	2	234621956	234621956	+	Missense_Mutation	SNP	C	C	A	novel	.	CESC		TCGA-2W-A8YY-01A-11D-A37N-09	TCGA-2W-A8YY-10A-01D-A37N-09	C	C	.	.	.	.	.	.	.	.	.	.	.	.	.	.	.	c.319C>A	p.Leu107Met	p.L107M	ENST00000373414	1/5	68	38	30	56	56	0	UGT1A8,missense_variant,p.Leu107Met,ENST00000608381,;UGT1A5,missense_variant,p.Leu107Met,ENST00000373414,;UGT1A10,intron_variant,,ENST00000373445,;UGT1A6,intron_variant,,ENST00000305139,;UGT1A6,intron_variant,,ENST00000373424,;UGT1A7,intron_variant,,ENST00000373426,;UGT1A8,intron_variant,,ENST00000609637,;UGT1A6,intron_variant,,ENST00000406651,;UGT1A10,intron_variant,,ENST00000344644,;UGT1A8,intr…	A	ENSG00000240224
UGT1A5	0	.	GRCh37	2	234622208	234622208	+	Missense_Mutation	SNP	T	T	C	novel	.	CESC		TCGA-JW-A852-01A-11D-A351-09	TCGA-JW-A852-10A-01D-A351-09	T	T	.	.	.	.	.	.	.	.	.	.	.	.	.	.	.	c.571T>C	p.Ser191Pro	p.S191P	ENST00000373414	1/5	80	53	27	161	161	0	UGT1A8,missense_variant,p.Ser191Pro,ENST00000608381,;UGT1A5,missense_variant,p.Ser191Pro,ENST00000373414,;UGT1A10,intron_variant,,ENST00000373445,;UGT1A6,intron_variant,,ENST00000305139,;UGT1A6,intron_variant,,ENST00000373424,;UGT1A7,intron_variant,,ENST00000373426,;UGT1A8,intron_variant,,ENST00000609637,;UGT1A6,intron_variant,,ENST00000406651,;UGT1A10,intron_variant,,ENST00000344644,;UGT1A8,intr…	C	ENSG00000240224
UGT1A6	0	.	GRCh37	2	234601716	234601716	+	Silent	SNP	C	C	T	novel	.	CESC		TCGA-2W-A8YY-01A-11D-A37N-09	TCGA-2W-A8YY-10A-01D-A37N-09	C	C	.	.	.	.	.	.	.	.	.	.	.	.	.	.	.	c.66C>T	p.%3D	p.G22G	ENST00000305139	1/5	30	16	14	28	28	0	UGT1A6,synonymous_variant,p.%3D,ENST00000441351,;UGT1A6,synonymous_variant,p.%3D,ENST00000305139,;UGT1A10,intron_variant,,ENST00000373445,;UGT1A6,intron_variant,,ENST00000373424,;UGT1A7,intron_variant,,ENST00000373426,;UGT1A8,intron_variant,,ENST00000609637,;UGT1A10,intron_variant,,ENST00000344644,;UGT1A8,intron_variant,,ENST00000373450,;UGT1A9,intron_variant,,ENST00000354728,;UGT1A7,downstream_g…	T	ENSG00000167165
UGT1A6	0	.	GRCh37	2	234601815	234601815	+	Silent	SNP	G	G	A	novel	.	CESC		TCGA-IR-A3LH-01A-21D-A20U-09	TCGA-IR-A3LH-10A-01D-A20U-09	G	G	.	.	.	.	.	.	.	.	.	.	.	.	.	.	.	c.165G>A	p.%3D	p.E55E	ENST00000305139	1/5	94	75	19	66	66	0	UGT1A6,synonymous_variant,p.%3D,ENST00000441351,;UGT1A6,synonymous_variant,p.%3D,ENST00000305139,;UGT1A10,intron_variant,,ENST00000373445,;UGT1A6,intron_variant,,ENST00000373424,;UGT1A7,intron_variant,,ENST00000373426,;UGT1A8,intron_variant,,ENST00000609637,;UGT1A10,intron_variant,,ENST00000344644,;UGT1A8,intron_variant,,ENST00000373450,;UGT1A9,intron_variant,,ENST00000354728,;UGT1A7,downstream_g…	A	ENSG00000167165
UGT1A6	0	.	GRCh37	2	234602059	234602059	+	Missense_Mutation	SNP	A	A	T	novel	.	CESC		TCGA-UC-A7PD-01A-11D-A351-09	TCGA-UC-A7PD-11A-12D-A351-09	A	A	.	.	.	.	.	.	.	.	.	.	.	.	.	.	.	c.409A>T	p.Asn137Tyr	p.N137Y	ENST00000305139	1/5	54	30	23	64	64	0	UGT1A6,missense_variant,p.Asn137Tyr,ENST00000441351,;UGT1A6,missense_variant,p.Asn137Tyr,ENST00000305139,;UGT1A10,intron_variant,,ENST00000373445,;UGT1A6,intron_variant,,ENST00000373424,;UGT1A7,intron_variant,,ENST00000373426,;UGT1A8,intron_variant,,ENST00000609637,;UGT1A10,intron_variant,,ENST00000344644,;UGT1A8,intron_variant,,ENST00000373450,;UGT1A9,intron_variant,,ENST00000354728,;UGT1A7,down…	T	ENSG00000167165
UGT1A6	0	.	GRCh37	2	234601667	234601667	+	Missense_Mutation	SNP	G	G	A	rs115279280	.	CESC		TCGA-ZJ-AAXA-01A-11D-A42O-09	TCGA-ZJ-AAXA-10A-01D-A42R-09	G	G	.	.	.	.	.	.	.	.	.	.	.	.	.	.	.	c.17G>A	p.Arg6His	p.R6H	ENST00000305139	1/5	28	17	10	52	52	0	UGT1A6,missense_variant,p.Arg6His,ENST00000441351,;UGT1A6,missense_variant,p.Arg6His,ENST00000305139,;UGT1A10,intron_variant,,ENST00000373445,;UGT1A6,intron_variant,,ENST00000373424,;UGT1A7,intron_variant,,ENST00000373426,;UGT1A8,intron_variant,,ENST00000609637,;UGT1A10,intron_variant,,ENST00000344644,;UGT1A8,intron_variant,,ENST00000373450,;UGT1A9,intron_variant,,ENST00000354728,;UGT1A7,downstre…	A	ENSG00000167165
UGT1A7	0	.	GRCh37	2	234590793	234590793	+	Silent	SNP	G	G	A	novel	.	CESC		TCGA-JW-A5VL-01A-11D-A28B-09	TCGA-JW-A5VL-10A-01D-A28E-09	G	G	.	.	.	.	.	.	.	.	.	.	.	.	.	.	.	c.210G>A	p.%3D	p.L70L	ENST00000373426	1/5	42	12	30	57	57	0	UGT1A7,synonymous_variant,p.%3D,ENST00000373426,;UGT1A10,intron_variant,,ENST00000373445,;UGT1A10,intron_variant,,ENST00000344644,;UGT1A8,intron_variant,,ENST00000373450,;UGT1A8,intron_variant,,ENST00000609637,;UGT1A9,intron_variant,,ENST00000354728,;UGT1A7,upstream_gene_variant,,ENST00000485022,;	A	ENSG00000244122
UGT1A7	0	.	GRCh37	2	234590816	234590816	+	Nonsense_Mutation	SNP	C	C	G	novel	.	CESC		TCGA-VS-A9UH-01A-11D-A42O-09	TCGA-VS-A9UH-10A-01D-A42R-09	C	C	.	.	.	.	.	.	.	.	.	.	.	.	.	.	.	c.233C>G	p.Ser78Ter	p.S78*	ENST00000373426	1/5	46	36	9	79	79	0	UGT1A7,stop_gained,p.Ser78Ter,ENST00000373426,;UGT1A10,intron_variant,,ENST00000373445,;UGT1A10,intron_variant,,ENST00000344644,;UGT1A8,intron_variant,,ENST00000373450,;UGT1A8,intron_variant,,ENST00000609637,;UGT1A9,intron_variant,,ENST00000354728,;UGT1A7,upstream_gene_variant,,ENST00000485022,;	G	ENSG00000244122
UGT1A8	0	.	GRCh37	2	234669139	234669139	+	Intron	SNP	G	G	A	novel	.	CESC		TCGA-C5-A7CL-01A-11D-A32I-09	TCGA-C5-A7CL-10A-01D-A32I-09	G	G	.	.	.	.	.	.	.	.	.	.	.	.	.	.	.	c.868-6541G>A	.	.	ENST00000609767	.	18	10	7	21	21	0	UGT1A8,missense_variant,p.Arg69Lys,ENST00000608383,;UGT1A8,missense_variant,p.Arg69Lys,ENST00000360418,;UGT1A1,missense_variant,p.Arg69Lys,ENST00000305208,;UGT1A10,intron_variant,,ENST00000373445,;UGT1A4,intron_variant,,ENST00000373409,;UGT1A6,intron_variant,,ENST00000305139,;UGT1A3,intron_variant,,ENST00000482026,;UGT1A6,intron_variant,,ENST00000373424,;UGT1A8,intron_variant,,ENST00000608381,;UG…	A	ENSG00000241635
UGT1A8	0	.	GRCh37	2	234526971	234526971	+	Missense_Mutation	SNP	A	A	T	novel	.	CESC		TCGA-2W-A8YY-01A-11D-A37N-09	TCGA-2W-A8YY-10A-01D-A37N-09	A	A	.	.	.	.	.	.	.	.	.	.	.	.	.	.	.	c.618A>T	p.Arg206Ser	p.R206S	ENST00000373450	1/5	87	80	7	112	112	0	UGT1A8,missense_variant,p.Arg206Ser,ENST00000373450,;	T	ENSG00000241635
UGT1A8	0	.	GRCh37	2	234669446	234669446	+	Intron	SNP	C	C	A	.	.	CESC		TCGA-2W-A8YY-01A-11D-A37N-09	TCGA-2W-A8YY-10A-01D-A37N-09	C	C	.	.	.	.	.	.	.	.	.	.	.	.	.	.	.	c.868-6234C>A	.	.	ENST00000609767	.	42	22	20	34	34	0	UGT1A8,missense_variant,p.Phe171Leu,ENST00000608383,;UGT1A8,missense_variant,p.Phe171Leu,ENST00000360418,;UGT1A1,missense_variant,p.Phe171Leu,ENST00000305208,;UGT1A10,intron_variant,,ENST00000373445,;UGT1A4,intron_variant,,ENST00000373409,;UGT1A6,intron_variant,,ENST00000305139,;UGT1A3,intron_variant,,ENST00000482026,;UGT1A6,intron_variant,,ENST00000373424,;UGT1A8,intron_variant,,ENST00000608381,…	A	ENSG00000241635
UGT1A8	0	.	GRCh37	2	234669586	234669586	+	Intron	SNP	C	C	T	novel	.	CESC		TCGA-IR-A3LK-01A-12D-A20U-09	TCGA-IR-A3LK-10A-01D-A20U-09	C	C	.	.	.	.	.	.	.	.	.	.	.	.	.	.	.	c.868-6094C>T	.	.	ENST00000609767	.	55	23	32	89	89	0	UGT1A8,missense_variant,p.Ser218Leu,ENST00000608383,;UGT1A8,missense_variant,p.Ser218Leu,ENST00000360418,;UGT1A1,missense_variant,p.Ser218Leu,ENST00000305208,;UGT1A10,intron_variant,,ENST00000373445,;UGT1A4,intron_variant,,ENST00000373409,;UGT1A6,intron_variant,,ENST00000305139,;UGT1A3,intron_variant,,ENST00000482026,;UGT1A6,intron_variant,,ENST00000373424,;UGT1A8,intron_variant,,ENST00000608381,…	T	ENSG00000241635
UGT1A8	0	.	GRCh37	2	234526593	234526593	+	Silent	SNP	A	A	G	novel	.	CESC		TCGA-VS-A959-01A-11D-A42O-09	TCGA-VS-A959-10A-01D-A42R-09	A	A	.	.	.	.	.	.	.	.	.	.	.	.	.	.	.	c.240A>G	p.%3D	p.S80S	ENST00000373450	1/5	64	56	8	80	80	0	UGT1A8,synonymous_variant,p.%3D,ENST00000373450,;	G	ENSG00000241635
UGT1A9	0	.	GRCh37	2	234581228	234581228	+	Silent	SNP	A	A	G	rs770437442	.	CESC		TCGA-FU-A3HZ-01A-11D-A20U-09	TCGA-FU-A3HZ-10A-01D-A20U-09	A	A	.	.	.	.	.	.	.	.	.	.	.	.	.	.	.	c.648A>G	p.%3D	p.E216E	ENST00000354728	1/5	55	46	8	93	93	0	UGT1A8,synonymous_variant,p.%3D,ENST00000609637,;UGT1A9,synonymous_variant,p.%3D,ENST00000354728,;UGT1A10,intron_variant,,ENST00000373445,;UGT1A10,intron_variant,,ENST00000344644,;UGT1A8,intron_variant,,ENST00000373450,;	G	ENSG00000241119
UGT1A9	0	.	GRCh37	2	234581298	234581298	+	Missense_Mutation	SNP	A	A	G	novel	.	CESC		TCGA-2W-A8YY-01A-11D-A37N-09	TCGA-2W-A8YY-10A-01D-A37N-09	A	A	.	.	.	.	.	.	.	.	.	.	.	.	.	.	.	c.718A>G	p.Thr240Ala	p.T240A	ENST00000354728	1/5	72	66	6	82	82	0	UGT1A8,missense_variant,p.Thr240Ala,ENST00000609637,;UGT1A9,missense_variant,p.Thr240Ala,ENST00000354728,;UGT1A10,intron_variant,,ENST00000373445,;UGT1A10,intron_variant,,ENST00000344644,;UGT1A8,intron_variant,,ENST00000373450,;	G	ENSG00000241119
UGT2A1	0	.	GRCh37	4	70461971	70461971	+	Silent	SNP	C	C	T	novel	.	CESC		TCGA-C5-A902-01A-11D-A37N-09	TCGA-C5-A902-10A-01D-A37N-09	C	C	.	.	.	.	.	.	.	.	.	.	.	.	.	.	.	c.993G>A	p.%3D	p.Q331Q	ENST00000503640	3/6	76	44	31	65	65	0	UGT2A1,synonymous_variant,p.%3D,ENST00000503640,;UGT2A2,synonymous_variant,p.%3D,ENST00000457664,;UGT2A2,synonymous_variant,p.%3D,ENST00000604629,;UGT2A1,intron_variant,,ENST00000286604,;UGT2A1,intron_variant,,ENST00000514019,;UGT2A2,intron_variant,,ENST00000604021,;UGT2A1,intron_variant,,ENST00000512704,;UGT2A1,intron_variant,,ENST00000502343,;UGT2A1,downstream_gene_variant,,ENST00000514341,;	T	ENSG00000173610
UGT2A1	0	.	GRCh37	4	70465090	70465090	+	Missense_Mutation	SNP	C	C	G	novel	.	CESC		TCGA-EK-A2RD-01A-12D-A20U-09	TCGA-EK-A2RD-10A-01D-A20U-09	C	C	.	.	.	.	.	.	.	.	.	.	.	.	.	.	.	c.1368G>C	p.Glu456Asp	p.E456D	ENST00000514019	4/7	29	21	8	42	42	0	UGT2A1,missense_variant,p.Glu290Asp,ENST00000286604,;UGT2A1,missense_variant,p.Glu456Asp,ENST00000514019,;UGT2A1,missense_variant,p.Glu246Asp,ENST00000503640,;UGT2A2,missense_variant,p.Glu256Asp,ENST00000604021,;UGT2A2,missense_variant,p.Glu255Asp,ENST00000457664,;UGT2A1,missense_variant,p.Glu246Asp,ENST00000512704,;UGT2A2,missense_variant,p.Glu256Asp,ENST00000604629,;UGT2A1,non_coding_transcript…	G	ENSG00000270386
UGT2A1	0	.	GRCh37	4	70460216	70460216	+	Missense_Mutation	SNP	C	C	T	novel	.	CESC		TCGA-IR-A3LH-01A-21D-A20U-09	TCGA-IR-A3LH-10A-01D-A20U-09	C	C	.	.	.	.	.	.	.	.	.	.	.	.	.	.	.	c.1781G>A	p.Arg594Lys	p.R594K	ENST00000514019	6/7	72	61	11	67	67	0	UGT2A1,missense_variant,p.Arg428Lys,ENST00000286604,;UGT2A1,missense_variant,p.Arg594Lys,ENST00000514019,;UGT2A1,missense_variant,p.Arg428Lys,ENST00000503640,;UGT2A2,missense_variant,p.Arg394Lys,ENST00000604021,;UGT2A2,missense_variant,p.Arg437Lys,ENST00000457664,;UGT2A1,missense_variant,p.Arg384Lys,ENST00000512704,;UGT2A2,missense_variant,p.Arg438Lys,ENST00000604629,;UGT2A1,non_coding_transcript…	T	ENSG00000270386
UGT2A3	0	.	GRCh37	4	69817060	69817060	+	Missense_Mutation	SNP	T	T	C	novel	.	CESC		TCGA-C5-A8ZZ-01A-11D-A37N-09	TCGA-C5-A8ZZ-10A-01D-A37N-09	T	T	.	.	.	.	.	.	.	.	.	.	.	.	.	.	.	c.419A>G	p.Glu140Gly	p.E140G	ENST00000251566	1/6	14	10	4	32	32	0	UGT2A3,missense_variant,p.Glu140Gly,ENST00000251566,;UGT2A3,5_prime_UTR_variant,,ENST00000420231,;UGT2A3,missense_variant,p.Glu6Gly,ENST00000503012,;	C	ENSG00000135220
UGT2A3	0	.	GRCh37	4	69816797	69816797	+	Missense_Mutation	SNP	G	G	A	rs371911179	.	CESC		TCGA-IR-A3LL-01A-11D-A20U-09	TCGA-IR-A3LL-10A-01D-A20U-09	G	G	.	.	.	.	.	.	.	.	.	.	.	.	.	.	.	c.682C>T	p.His228Tyr	p.H228Y	ENST00000251566	1/6	35	27	8	45	45	0	UGT2A3,missense_variant,p.His228Tyr,ENST00000251566,;UGT2A3,5_prime_UTR_variant,,ENST00000420231,;UGT2A3,missense_variant,p.His94Tyr,ENST00000503012,;	A	ENSG00000135220
UGT2A3	0	.	GRCh37	4	69795613	69795613	+	Missense_Mutation	SNP	G	G	C	novel	.	CESC		TCGA-MA-AA3X-01A-22D-A42O-09	TCGA-MA-AA3X-10A-01D-A42R-09	G	G	.	.	.	.	.	.	.	.	.	.	.	.	.	.	.	c.1502C>G	p.Thr501Ser	p.T501S	ENST00000251566	6/6	42	28	14	87	87	0	UGT2A3,missense_variant,p.Thr501Ser,ENST00000251566,;UGT2A3,missense_variant,p.Thr212Ser,ENST00000420231,;UGT2A3,3_prime_UTR_variant,,ENST00000503012,;	C	ENSG00000135220
UGT2A3	0	.	GRCh37	4	69795749	69795749	+	Missense_Mutation	SNP	C	C	T	rs776563947	.	CESC		TCGA-MA-AA41-01A-11D-A387-09	TCGA-MA-AA41-10A-01D-A38A-09	C	C	.	.	.	.	.	.	.	.	.	.	.	.	.	.	.	c.1366G>A	p.Asp456Asn	p.D456N	ENST00000251566	6/6	87	81	6	129	129	0	UGT2A3,missense_variant,p.Asp456Asn,ENST00000251566,;UGT2A3,missense_variant,p.Asp167Asn,ENST00000420231,;UGT2A3,3_prime_UTR_variant,,ENST00000503012,;	T	ENSG00000135220
UGT2A3	0	.	GRCh37	4	69817137	69817137	+	Frame_Shift_Del	DEL	A	A	-	.	.	CESC		TCGA-VS-A9UJ-01A-11D-A42O-09	TCGA-VS-A9UJ-10A-01D-A42R-09	A	A	.	.	.	.	.	.	.	.	.	.	.	.	.	.	.	c.342delT	p.Phe114LeufsTer4	p.F114Lfs*4	ENST00000251566	1/6	27	24	3	31	31	0	UGT2A3,frameshift_variant,p.Phe114LeufsTer4,ENST00000251566,;UGT2A3,upstream_gene_variant,,ENST00000420231,;UGT2A3,upstream_gene_variant,,ENST00000503012,;	-	ENSG00000135220
UGT2B10	0	.	GRCh37	4	69692191	69692191	+	Missense_Mutation	SNP	T	T	C	novel	.	CESC		TCGA-C5-A7UE-01A-11D-A33O-09	TCGA-C5-A7UE-10A-01D-A33O-09	T	T	.	.	.	.	.	.	.	.	.	.	.	.	.	.	.	c.1063T>C	p.Trp355Arg	p.W355R	ENST00000265403	4/6	253	212	41	222	222	0	UGT2B10,missense_variant,p.Trp355Arg,ENST00000265403,;UGT2B10,missense_variant,p.Trp271Arg,ENST00000458688,;	C	ENSG00000109181
UGT2B10	0	.	GRCh37	4	69696681	69696681	+	3'UTR	SNP	T	T	G	novel	.	CESC		TCGA-FU-A3HZ-01A-11D-A20U-09	TCGA-FU-A3HZ-10A-01D-A20U-09	T	T	.	.	.	.	.	.	.	.	.	.	.	.	.	.	.	c.*84T>G	.	.	ENST00000265403	6/6	14	6	8	36	36	0	UGT2B10,3_prime_UTR_variant,,ENST00000265403,;UGT2B10,downstream_gene_variant,,ENST00000458688,;RP11-468N14.3,downstream_gene_variant,,ENST00000512503,;	G	ENSG00000109181
UGT2B10	0	.	GRCh37	4	69692206	69692206	+	Missense_Mutation	SNP	G	G	A	novel	.	CESC		TCGA-FU-A770-01A-11D-A33O-09	TCGA-FU-A770-10A-01D-A33O-09	G	G	.	.	.	.	.	.	.	.	.	.	.	.	.	.	.	c.1078G>A	p.Asp360Asn	p.D360N	ENST00000265403	4/6	155	112	43	167	167	0	UGT2B10,missense_variant,p.Asp360Asn,ENST00000265403,;UGT2B10,missense_variant,p.Asp276Asn,ENST00000458688,;	A	ENSG00000109181
UGT2B10	0	.	GRCh37	4	69681747	69681747	+	Missense_Mutation	SNP	A	A	C	novel	.	CESC		TCGA-2W-A8YY-01A-11D-A37N-09	TCGA-2W-A8YY-10A-01D-A37N-09	A	A	.	.	.	.	.	.	.	.	.	.	.	.	.	.	.	c.10A>C	p.Lys4Gln	p.K4Q	ENST00000265403	1/6	90	48	42	81	81	0	UGT2B10,missense_variant,p.Lys4Gln,ENST00000265403,;UGT2B10,missense_variant,p.Lys4Gln,ENST00000458688,;RP11-468N14.1,downstream_gene_variant,,ENST00000507455,;	C	ENSG00000109181
UGT2B10	0	.	GRCh37	4	69696412	69696412	+	Missense_Mutation	SNP	C	C	T	.	.	CESC		TCGA-2W-A8YY-01A-11D-A37N-09	TCGA-2W-A8YY-10A-01D-A37N-09	C	C	.	.	.	.	.	.	.	.	.	.	.	.	.	.	.	c.1402C>T	p.Arg468Cys	p.R468C	ENST00000265403	6/6	137	80	56	185	184	0	UGT2B10,missense_variant,p.Arg468Cys,ENST00000265403,;UGT2B10,missense_variant,p.Arg384Cys,ENST00000458688,;RP11-468N14.3,downstream_gene_variant,,ENST00000512503,;	T	ENSG00000109181
UGT2B10	0	.	GRCh37	4	69692182	69692182	+	Missense_Mutation	SNP	C	C	A	novel	.	CESC		TCGA-R2-A69V-01A-11D-A32I-09	TCGA-R2-A69V-10A-01D-A32I-09	C	C	.	.	.	.	.	.	.	.	.	.	.	.	.	.	.	c.1054C>A	p.Leu352Met	p.L352M	ENST00000265403	4/6	76	66	10	190	190	0	UGT2B10,missense_variant,p.Leu352Met,ENST00000265403,;UGT2B10,missense_variant,p.Leu268Met,ENST00000458688,;	A	ENSG00000109181
UGT2B11	0	.	GRCh37	4	70079880	70079880	+	Silent	SNP	C	C	T	novel	.	CESC		TCGA-EK-A2PG-01A-11D-A18J-09	TCGA-EK-A2PG-10A-01D-A18J-09	C	C	.	.	.	.	.	.	.	.	.	.	.	.	.	.	.	c.561G>A	p.%3D	p.L187L	ENST00000446444	1/6	96	56	39	147	146	0	UGT2B11,synonymous_variant,p.%3D,ENST00000446444,;RP11-704M14.1,intron_variant,,ENST00000504301,;RP11-704M14.1,intron_variant,,ENST00000505646,;RP11-704M14.2,downstream_gene_variant,,ENST00000514003,;	T	ENSG00000213759
UGT2B11	0	.	GRCh37	4	70080030	70080030	+	Missense_Mutation	SNP	C	C	T	novel	.	CESC		TCGA-EK-A2PG-01A-11D-A18J-09	TCGA-EK-A2PG-10A-01D-A18J-09	C	C	.	.	.	.	.	.	.	.	.	.	.	.	.	.	.	c.411G>A	p.Met137Ile	p.M137I	ENST00000446444	1/6	51	34	17	77	77	0	UGT2B11,missense_variant,p.Met137Ile,ENST00000446444,;RP11-704M14.1,intron_variant,,ENST00000504301,;RP11-704M14.1,intron_variant,,ENST00000505646,;RP11-704M14.2,downstream_gene_variant,,ENST00000514003,;	T	ENSG00000213759
UGT2B11	0	.	GRCh37	4	70080441	70080441	+	5'UTR	SNP	C	C	G	rs759272017	.	CESC		TCGA-EK-A2PG-01A-11D-A18J-09	TCGA-EK-A2PG-10A-01D-A18J-09	C	C	.	.	.	.	.	.	.	.	.	.	.	.	.	.	.	c.-1G>C	.	.	ENST00000446444	1/6	85	54	31	93	93	0	UGT2B11,5_prime_UTR_variant,,ENST00000446444,;RP11-704M14.1,non_coding_transcript_exon_variant,,ENST00000505646,;RP11-704M14.1,downstream_gene_variant,,ENST00000504301,;RP11-704M14.2,downstream_gene_variant,,ENST00000514003,;	G	ENSG00000213759
UGT2B11	0	.	GRCh37	4	70074066	70074066	+	Intron	SNP	T	T	A	novel	.	CESC		TCGA-HG-A9SC-01A-21D-A42O-09	TCGA-HG-A9SC-10A-01D-A42R-09	T	T	.	.	.	.	.	.	.	.	.	.	.	.	.	.	.	c.1002+3A>T	.	.	ENST00000446444	.	172	126	46	105	105	0	UGT2B11,splice_region_variant,,ENST00000446444,;RP11-704M14.1,intron_variant,,ENST00000504301,;RP11-704M14.1,intron_variant,,ENST00000505646,;UGT2B11,upstream_gene_variant,,ENST00000513315,;	A	ENSG00000213759
UGT2B11	0	.	GRCh37	4	70066211	70066211	+	Missense_Mutation	SNP	G	G	T	novel	.	CESC		TCGA-2W-A8YY-01A-11D-A37N-09	TCGA-2W-A8YY-10A-01D-A37N-09	G	G	.	.	.	.	.	.	.	.	.	.	.	.	.	.	.	c.1537C>A	p.Leu513Met	p.L513M	ENST00000446444	6/6	133	88	44	151	151	0	UGT2B11,missense_variant,p.Leu513Met,ENST00000446444,;RP11-704M14.1,non_coding_transcript_exon_variant,,ENST00000504301,;RP11-704M14.1,non_coding_transcript_exon_variant,,ENST00000505646,;UGT2B11,downstream_gene_variant,,ENST00000513315,;	T	ENSG00000213759
UGT2B11	0	.	GRCh37	4	70080248	70080248	+	Missense_Mutation	SNP	C	C	T	novel	.	CESC		TCGA-IR-A3LL-01A-11D-A20U-09	TCGA-IR-A3LL-10A-01D-A20U-09	C	C	.	.	.	.	.	.	.	.	.	.	.	.	.	.	.	c.193G>A	p.Asp65Asn	p.D65N	ENST00000446444	1/6	56	41	15	101	101	0	UGT2B11,missense_variant,p.Asp65Asn,ENST00000446444,;RP11-704M14.1,non_coding_transcript_exon_variant,,ENST00000505646,;RP11-704M14.1,downstream_gene_variant,,ENST00000504301,;RP11-704M14.2,downstream_gene_variant,,ENST00000514003,;	T	ENSG00000213759
UGT2B11	0	.	GRCh37	4	70074191	70074191	+	Missense_Mutation	SNP	C	C	T	novel	.	CESC		TCGA-JW-A5VL-01A-11D-A28B-09	TCGA-JW-A5VL-10A-01D-A28E-09	C	C	.	.	.	.	.	.	.	.	.	.	.	.	.	.	.	c.880G>A	p.Glu294Lys	p.E294K	ENST00000446444	3/6	160	100	60	149	149	0	UGT2B11,missense_variant,p.Glu294Lys,ENST00000446444,;RP11-704M14.1,intron_variant,,ENST00000504301,;RP11-704M14.1,intron_variant,,ENST00000505646,;UGT2B11,upstream_gene_variant,,ENST00000513315,;	T	ENSG00000213759
UGT2B11	0	.	GRCh37	4	70070322	70070322	+	Missense_Mutation	SNP	C	C	T	novel	.	CESC		TCGA-VS-A94Z-01A-11D-A387-09	TCGA-VS-A94Z-10A-01D-A38A-09	C	C	.	.	.	.	.	.	.	.	.	.	.	.	.	.	.	c.1136G>A	p.Gly379Asp	p.G379D	ENST00000446444	5/6	169	146	22	207	207	0	UGT2B11,missense_variant,p.Gly379Asp,ENST00000446444,;RP11-704M14.1,intron_variant,,ENST00000504301,;RP11-704M14.1,intron_variant,,ENST00000505646,;UGT2B11,non_coding_transcript_exon_variant,,ENST00000513315,;	T	ENSG00000213759
UGT2B15	0	.	GRCh37	4	69513036	69513036	+	Missense_Mutation	SNP	C	C	T	rs148054959	.	CESC		TCGA-C5-A1M6-01A-11D-A13W-08	TCGA-C5-A1M6-10A-01D-A13W-08	C	C	.	.	.	.	.	.	.	.	.	.	.	.	.	.	.	c.1379G>A	p.Arg460Gln	p.R460Q	ENST00000338206	6/6	144	95	48	229	229	0	UGT2B15,missense_variant,p.Arg460Gln,ENST00000338206,;	T	ENSG00000196620
UGT2B15	0	.	GRCh37	4	69528803	69528803	+	Missense_Mutation	SNP	G	G	C	novel	.	CESC		TCGA-DR-A0ZM-01A-12D-A10S-08	TCGA-DR-A0ZM-10A-01D-A10S-08	G	G	.	.	.	.	.	.	.	.	.	.	.	.	.	.	.	c.928C>G	p.Leu310Val	p.L310V	ENST00000338206	3/6	334	272	62	378	378	0	UGT2B15,missense_variant,p.Leu310Val,ENST00000338206,;	C	ENSG00000196620
UGT2B15	0	.	GRCh37	4	69519864	69519864	+	Missense_Mutation	SNP	C	C	T	novel	.	CESC		TCGA-EA-A3HT-01A-61D-A21Q-09	TCGA-EA-A3HT-10A-01D-A21Q-09	C	C	.	.	.	.	.	.	.	.	.	.	.	.	.	.	.	c.1204G>A	p.Asp402Asn	p.D402N	ENST00000338206	5/6	140	104	36	148	148	0	UGT2B15,missense_variant,p.Asp402Asn,ENST00000338206,;	T	ENSG00000196620
UGT2B15	0	.	GRCh37	4	69528857	69528857	+	Missense_Mutation	SNP	C	C	T	novel	.	CESC		TCGA-2W-A8YY-01A-11D-A37N-09	TCGA-2W-A8YY-10A-01D-A37N-09	C	C	.	.	.	.	.	.	.	.	.	.	.	.	.	.	.	c.874G>A	p.Glu292Lys	p.E292K	ENST00000338206	3/6	58	51	6	90	90	0	UGT2B15,missense_variant,p.Glu292Lys,ENST00000338206,;	T	ENSG00000196620
UGT2B15	0	.	GRCh37	4	69535816	69535816	+	Missense_Mutation	SNP	C	C	T	rs377015117	.	CESC		TCGA-2W-A8YY-01A-11D-A37N-09	TCGA-2W-A8YY-10A-01D-A37N-09	C	C	.	.	.	.	.	.	.	.	.	.	.	.	.	.	.	c.521G>A	p.Arg174Gln	p.R174Q	ENST00000338206	1/6	55	41	14	75	75	0	UGT2B15,missense_variant,p.Arg174Gln,ENST00000338206,;	T	ENSG00000196620
UGT2B15	0	.	GRCh37	4	69519921	69519921	+	Missense_Mutation	SNP	C	C	G	novel	.	CESC		TCGA-Q1-A73O-01A-11D-A32I-09	TCGA-Q1-A73O-10B-01D-A32I-09	C	C	.	.	.	.	.	.	.	.	.	.	.	.	.	.	.	c.1147G>C	p.Glu383Gln	p.E383Q	ENST00000338206	5/6	122	98	23	119	119	0	UGT2B15,missense_variant,p.Glu383Gln,ENST00000338206,;	G	ENSG00000196620
UGT2B17	0	.	GRCh37	4	69433510	69433510	+	Missense_Mutation	SNP	C	C	G	novel	.	CESC		TCGA-C5-A1MP-01A-11D-A14W-08	TCGA-C5-A1MP-10A-01D-A14W-08	C	C	.	.	.	.	.	.	.	.	.	.	.	.	.	.	.	c.693G>C	p.Lys231Asn	p.K231N	ENST00000317746	1/6	101	85	16	85	85	0	UGT2B17,missense_variant,p.Lys231Asn,ENST00000317746,;	G	ENSG00000197888
UGT2B17	0	.	GRCh37	4	69403561	69403561	+	Missense_Mutation	SNP	C	C	T	novel	.	CESC		TCGA-C5-A8YQ-01A-11D-A37N-09	TCGA-C5-A8YQ-10A-01D-A37N-09	C	C	.	.	.	.	.	.	.	.	.	.	.	.	.	.	.	c.1375G>A	p.Asp459Asn	p.D459N	ENST00000317746	6/6	89	68	21	92	92	0	UGT2B17,missense_variant,p.Asp459Asn,ENST00000317746,;	T	ENSG00000197888
UGT2B17	0	.	GRCh37	4	69426371	69426371	+	Missense_Mutation	SNP	C	C	T	rs773586559	.	CESC		TCGA-EA-A3QD-01A-32D-A22X-09	TCGA-EA-A3QD-10A-01D-A22X-09	C	C	.	.	.	.	.	.	.	.	.	.	.	.	.	.	.	c.889G>A	p.Val297Met	p.V297M	ENST00000317746	3/6	40	24	16	50	50	0	UGT2B17,missense_variant,p.Val297Met,ENST00000317746,;	T	ENSG00000197888
UGT2B17	0	.	GRCh37	4	69433770	69433770	+	Missense_Mutation	SNP	T	T	C	novel	.	CESC		TCGA-EK-A2PL-01A-11D-A18J-09	TCGA-EK-A2PL-10A-01D-A18J-09	T	T	.	.	.	.	.	.	.	.	.	.	.	.	.	.	.	c.433A>G	p.Lys145Glu	p.K145E	ENST00000317746	1/6	62	48	13	49	48	0	UGT2B17,missense_variant,p.Lys145Glu,ENST00000317746,;	C	ENSG00000197888
UGT2B28	0	.	GRCh37	4	70160416	70160416	+	Silent	SNP	G	G	C	rs775380271	.	CESC		TCGA-EK-A3GK-01A-11D-A20U-09	TCGA-EK-A3GK-10A-01D-A20U-09	G	G	.	.	.	.	.	.	.	.	.	.	.	.	.	.	.	c.1479G>C	p.%3D	p.V493V	ENST00000335568	6/6	43	34	9	140	140	0	UGT2B28,synonymous_variant,p.%3D,ENST00000335568,;UGT2B28,3_prime_UTR_variant,,ENST00000511240,;	C	ENSG00000135226
UGT2B4	0	.	GRCh37	4	70346610	70346610	+	Missense_Mutation	SNP	C	C	T	.	.	CESC		TCGA-C5-A907-01A-11D-A37N-09	TCGA-C5-A907-10A-01D-A37N-09	C	C	.	.	.	.	.	.	.	.	.	.	.	.	.	.	.	c.1329G>A	p.Met443Ile	p.M443I	ENST00000305107	6/6	56	47	9	88	88	0	UGT2B4,missense_variant,p.Met443Ile,ENST00000305107,;UGT2B4,missense_variant,p.Met307Ile,ENST00000381096,;UGT2B4,stop_retained_variant,p.%3D,ENST00000512583,;AC108078.1,downstream_gene_variant,,ENST00000583573,;UGT2B4,non_coding_transcript_exon_variant,,ENST00000506580,;UGT2B4,downstream_gene_variant,,ENST00000502655,;	T	ENSG00000156096
UGT2B4	0	.	GRCh37	4	70361486	70361486	+	Nonsense_Mutation	SNP	C	C	A	novel	.	CESC		TCGA-FU-A3HZ-01A-11D-A20U-09	TCGA-FU-A3HZ-10A-01D-A20U-09	C	C	.	.	.	.	.	.	.	.	.	.	.	.	.	.	.	c.94G>T	p.Glu32Ter	p.E32*	ENST00000305107	1/6	61	44	16	108	108	0	UGT2B4,stop_gained,p.Glu32Ter,ENST00000510114,;UGT2B4,stop_gained,p.Glu32Ter,ENST00000305107,;UGT2B4,stop_gained,p.Glu32Ter,ENST00000512583,;UGT2B4,intron_variant,,ENST00000381096,;UGT2B4,non_coding_transcript_exon_variant,,ENST00000506580,;UGT2B4,intron_variant,,ENST00000503836,;UGT2B4,intron_variant,,ENST00000502655,;	A	ENSG00000156096
UGT2B4	0	.	GRCh37	4	70346495	70346495	+	Missense_Mutation	SNP	C	C	T	rs767837637	.	CESC		TCGA-ZJ-AB0H-01A-11D-A42O-09	TCGA-ZJ-AB0H-10A-01D-A42R-09	C	C	.	.	.	.	.	.	.	.	.	.	.	.	.	.	.	c.1444G>A	p.Asp482Asn	p.D482N	ENST00000305107	6/6	233	221	12	174	174	0	UGT2B4,missense_variant,p.Asp482Asn,ENST00000305107,;UGT2B4,missense_variant,p.Asp346Asn,ENST00000381096,;UGT2B4,3_prime_UTR_variant,,ENST00000512583,;AC108078.1,downstream_gene_variant,,ENST00000583573,;UGT2B4,non_coding_transcript_exon_variant,,ENST00000506580,;UGT2B4,downstream_gene_variant,,ENST00000502655,;	T	ENSG00000156096
UGT2B7	0	.	GRCh37	4	69962710	69962710	+	Missense_Mutation	SNP	G	G	A	.	.	CESC		TCGA-Q1-A73P-01A-11D-A32I-09	TCGA-Q1-A73P-10B-01D-A32I-09	G	G	.	.	.	.	.	.	.	.	.	.	.	.	.	.	.	c.472G>A	p.Glu158Lys	p.E158K	ENST00000305231	1/6	75	38	36	130	130	0	UGT2B7,missense_variant,p.Glu158Lys,ENST00000305231,;UGT2B7,missense_variant,p.Glu158Lys,ENST00000508661,;UGT2B7,intron_variant,,ENST00000502942,;UGT2B7,intron_variant,,ENST00000509763,;	A	ENSG00000171234
UGT3A1	0	.	GRCh37	5	35954391	35954391	+	Silent	SNP	G	G	T	rs377507437	.	CESC		TCGA-DG-A2KK-01A-11D-A17W-09	TCGA-DG-A2KK-10A-01D-A17W-09	G	G	.	.	.	.	.	.	.	.	.	.	.	.	.	.	.	c.1485C>A	p.%3D	p.L495L	ENST00000274278	7/7	59	54	4	62	62	0	UGT3A1,synonymous_variant,p.%3D,ENST00000274278,;UGT3A1,downstream_gene_variant,,ENST00000507113,;UGT3A1,downstream_gene_variant,,ENST00000503189,;UGT3A1,downstream_gene_variant,,ENST00000513233,;UGT3A1,3_prime_UTR_variant,,ENST00000515801,;	T	ENSG00000145626
UGT3A1	0	.	GRCh37	5	35991379	35991379	+	5'UTR	SNP	C	C	T	novel	.	CESC		TCGA-EA-A3HS-01A-11D-A20U-09	TCGA-EA-A3HS-10B-01D-A20U-09	C	C	.	.	.	.	.	.	.	.	.	.	.	.	.	.	.	c.-37G>A	.	.	ENST00000274278	1/7	40	37	3	27	27	0	UGT3A1,5_prime_UTR_variant,,ENST00000274278,;UGT3A1,5_prime_UTR_variant,,ENST00000507113,;UGT3A1,5_prime_UTR_variant,,ENST00000503189,;UGT3A1,intron_variant,,ENST00000333811,;UGT3A1,non_coding_transcript_exon_variant,,ENST00000513233,;UGT3A1,5_prime_UTR_variant,,ENST00000515801,;	T	ENSG00000145626
UGT3A1	0	.	GRCh37	5	35955838	35955838	+	Missense_Mutation	SNP	C	C	T	novel	.	CESC		TCGA-2W-A8YY-01A-11D-A37N-09	TCGA-2W-A8YY-10A-01D-A37N-09	C	C	.	.	.	.	.	.	.	.	.	.	.	.	.	.	.	c.1204G>A	p.Val402Ile	p.V402I	ENST00000274278	6/7	43	26	16	50	50	0	UGT3A1,missense_variant,p.Val402Ile,ENST00000274278,;UGT3A1,missense_variant,p.Val368Ile,ENST00000507113,;UGT3A1,missense_variant,p.Val402Ile,ENST00000503189,;UGT3A1,non_coding_transcript_exon_variant,,ENST00000513233,;UGT3A1,3_prime_UTR_variant,,ENST00000515801,;	T	ENSG00000145626
UGT3A1	0	.	GRCh37	5	35988572	35988572	+	Missense_Mutation	SNP	C	C	T	novel	.	CESC		TCGA-IR-A3LL-01A-11D-A20U-09	TCGA-IR-A3LL-10A-01D-A20U-09	C	C	.	.	.	.	.	.	.	.	.	.	.	.	.	.	.	c.176G>A	p.Ser59Asn	p.S59N	ENST00000274278	2/7	37	29	8	28	28	0	UGT3A1,missense_variant,p.Ser59Asn,ENST00000274278,;UGT3A1,missense_variant,p.Ser5Asn,ENST00000333811,;UGT3A1,missense_variant,p.Ser59Asn,ENST00000503189,;UGT3A1,intron_variant,,ENST00000507113,;UGT3A1,intron_variant,,ENST00000513233,;UGT3A1,3_prime_UTR_variant,,ENST00000515801,;	T	ENSG00000145626
UGT3A1	0	.	GRCh37	5	35954178	35954178	+	3'UTR	SNP	G	G	A	novel	.	CESC		TCGA-MU-A8JM-01A-11D-A36J-09	TCGA-MU-A8JM-10A-01D-A36M-09	G	G	.	.	.	.	.	.	.	.	.	.	.	.	.	.	.	c.*126C>T	.	.	ENST00000274278	7/7	38	25	12	50	50	0	UGT3A1,3_prime_UTR_variant,,ENST00000274278,;UGT3A1,downstream_gene_variant,,ENST00000507113,;UGT3A1,downstream_gene_variant,,ENST00000503189,;UGT3A1,downstream_gene_variant,,ENST00000513233,;UGT3A1,3_prime_UTR_variant,,ENST00000515801,;	A	ENSG00000145626
UGT3A2	0	.	GRCh37	5	36038116	36038116	+	Missense_Mutation	SNP	G	G	A	rs542527700	.	CESC		TCGA-DS-A0VM-01A-11D-A10S-08	TCGA-DS-A0VM-10A-01D-A10S-08	G	G	.	.	.	.	.	.	.	.	.	.	.	.	.	.	.	c.1078C>T	p.His360Tyr	p.H360Y	ENST00000282507	6/7	96	54	42	95	95	0	UGT3A2,missense_variant,p.His326Tyr,ENST00000513300,;UGT3A2,missense_variant,p.His58Tyr,ENST00000545528,;UGT3A2,missense_variant,p.His360Tyr,ENST00000282507,;UGT3A2,downstream_gene_variant,,ENST00000504954,;UGT3A2,splice_region_variant,,ENST00000504685,;	A	ENSG00000168671
UGT3A2	0	.	GRCh37	5	36066870	36066870	+	Missense_Mutation	SNP	G	G	A	novel	.	CESC		TCGA-JW-A5VL-01A-11D-A28B-09	TCGA-JW-A5VL-10A-01D-A28E-09	G	G	.	.	.	.	.	.	.	.	.	.	.	.	.	.	.	c.22C>T	p.Leu8Phe	p.L8F	ENST00000282507	1/7	51	26	25	49	49	0	UGT3A2,missense_variant,p.Leu8Phe,ENST00000513300,;UGT3A2,missense_variant,p.Leu8Phe,ENST00000515131,;UGT3A2,missense_variant,p.Leu8Phe,ENST00000282507,;UGT3A2,5_prime_UTR_variant,,ENST00000545528,;UGT3A2,intron_variant,,ENST00000504954,;UGT3A2,missense_variant,p.Leu8Phe,ENST00000504685,;	A	ENSG00000168671
UGT3A2	0	.	GRCh37	5	36039690	36039690	+	Missense_Mutation	SNP	G	G	A	novel	.	CESC		TCGA-JX-A3Q0-01A-11D-A21Q-09	TCGA-JX-A3Q0-10A-01D-A21Q-09	G	G	.	.	.	.	.	.	.	.	.	.	.	.	.	.	.	c.964C>T	p.His322Tyr	p.H322Y	ENST00000282507	5/7	35	23	11	73	73	0	UGT3A2,missense_variant,p.His288Tyr,ENST00000513300,;UGT3A2,missense_variant,p.His20Tyr,ENST00000545528,;UGT3A2,missense_variant,p.His322Tyr,ENST00000282507,;UGT3A2,downstream_gene_variant,,ENST00000504954,;UGT3A2,3_prime_UTR_variant,,ENST00000504685,;	A	ENSG00000168671
UGT3A2	0	.	GRCh37	5	36039601	36039601	+	Nonsense_Mutation	SNP	C	C	T	novel	.	CESC		TCGA-VS-A9U6-01A-11D-A42O-09	TCGA-VS-A9U6-10A-01D-A42R-09	C	C	.	.	.	.	.	.	.	.	.	.	.	.	.	.	.	c.1053G>A	p.Trp351Ter	p.W351*	ENST00000282507	5/7	45	29	16	39	39	0	UGT3A2,stop_gained,p.Trp317Ter,ENST00000513300,;UGT3A2,stop_gained,p.Trp49Ter,ENST00000545528,;UGT3A2,stop_gained,p.Trp351Ter,ENST00000282507,;UGT3A2,downstream_gene_variant,,ENST00000504954,;UGT3A2,3_prime_UTR_variant,,ENST00000504685,;	T	ENSG00000168671
UGT3A2	0	.	GRCh37	5	36066967	36066967	+	5'UTR	SNP	C	C	G	novel	.	CESC		TCGA-VS-A9U7-01A-11D-A42O-09	TCGA-VS-A9U7-10A-01D-A42R-09	C	C	.	.	.	.	.	.	.	.	.	.	.	.	.	.	.	c.-76G>C	.	.	ENST00000282507	1/7	29	15	14	28	28	0	UGT3A2,5_prime_UTR_variant,,ENST00000513300,;UGT3A2,5_prime_UTR_variant,,ENST00000545528,;UGT3A2,5_prime_UTR_variant,,ENST00000515131,;UGT3A2,5_prime_UTR_variant,,ENST00000282507,;UGT3A2,intron_variant,,ENST00000504954,;UGT3A2,5_prime_UTR_variant,,ENST00000504685,;CTD-2197M16.1,downstream_gene_variant,,ENST00000505367,;	G	ENSG00000168671
UGT8	0	.	GRCh37	4	115544606	115544606	+	Silent	SNP	G	G	A	novel	.	CESC		TCGA-JW-AAVH-01A-11D-A387-09	TCGA-JW-AAVH-10A-01D-A38A-09	G	G	.	.	.	.	.	.	.	.	.	.	.	.	.	.	.	c.570G>A	p.%3D	p.L190L	ENST00000310836	2/6	58	53	5	50	50	0	UGT8,synonymous_variant,p.%3D,ENST00000310836,;UGT8,synonymous_variant,p.%3D,ENST00000394511,;UGT8,downstream_gene_variant,,ENST00000507710,;	A	ENSG00000174607
UGT8	0	.	GRCh37	4	115589440	115589440	+	Silent	SNP	G	G	T	rs145525328	.	CESC		TCGA-Q1-A73O-01A-11D-A32I-09	TCGA-Q1-A73O-10B-01D-A32I-09	G	G	.	.	.	.	.	.	.	.	.	.	.	.	.	.	.	c.1242G>T	p.%3D	p.V414V	ENST00000310836	5/6	45	36	9	27	27	0	UGT8,synonymous_variant,p.%3D,ENST00000310836,;UGT8,synonymous_variant,p.%3D,ENST00000394511,;	T	ENSG00000174607
UGT8	0	.	GRCh37	4	115544657	115544657	+	Silent	SNP	C	C	A	novel	.	CESC		TCGA-RA-A741-01A-11D-A33O-09	TCGA-RA-A741-10B-01D-A33O-09	C	C	.	.	.	.	.	.	.	.	.	.	.	.	.	.	.	c.621C>A	p.%3D	p.V207V	ENST00000310836	2/6	57	41	15	61	61	0	UGT8,synonymous_variant,p.%3D,ENST00000310836,;UGT8,synonymous_variant,p.%3D,ENST00000394511,;UGT8,downstream_gene_variant,,ENST00000507710,;	A	ENSG00000174607
UGT8	0	.	GRCh37	4	115597482	115597482	+	3'UTR	SNP	C	C	G	novel	.	CESC		TCGA-VS-A9V1-01A-11D-A42O-09	TCGA-VS-A9V1-10A-01D-A42R-09	C	C	.	.	.	.	.	.	.	.	.	.	.	.	.	.	.	c.*38C>G	.	.	ENST00000310836	6/6	57	40	17	70	70	0	UGT8,3_prime_UTR_variant,,ENST00000310836,;UGT8,3_prime_UTR_variant,,ENST00000394511,;	G	ENSG00000174607
[truncated: 66 more columns]

## Sheet: CHOL
Hugo_Symbol	Entrez_Gene_Id	Center	NCBI_Build	Chromosome	Start_Position	End_Position	Strand	Variant_Classification	Variant_Type	Reference_Allele	Tumor_Seq_Allele1	Tumor_Seq_Allele2	dbSNP_RS	dbSNP_Val_Status	TCGA Cancer type		Tumor_Sample_Barcode	Matched_Norm_Sample_Barcode	Match_Norm_Seq_Allele1	Match_Norm_Seq_Allele2	Tumor_Validation_Allele1	Tumor_Validation_Allele2	Match_Norm_Validation_Allele1	Match_Norm_Validation_Allele2	Verification_Status	Validation_Status	Mutation_Status	Sequencing_Phase	Sequence_Source	Validation_Method	Score	BAM_File	Sequencer	Tumor_Sample_UUID	Matched_Norm_Sample_UUID	HGVSc	HGVSp	HGVSp_Short	Transcript_ID	Exon_Number	t_depth	t_ref_count	t_alt_count	n_depth	n_ref_count	n_alt_count	all_effects	Allele	Gene
UGT2B15	0	.	GRCh37	4	69520862	69520862	+	Frame_Shift_Del	DEL	T	T	-	novel	.	CHOL		TCGA-W5-AA39-01A-11D-A417-09	TCGA-W5-AA39-10A-01D-A41A-09	T	T	.	.	.	.	.	.	.	.	.	.	.	.	.	.	.	c.1044delA	p.Gly349ValfsTer25	p.G349Vfs*25	ENST00000338206	4/6	93	53	40	146	146	0	UGT2B15,frameshift_variant,p.Gly349ValfsTer25,ENST00000338206,;	-	ENSG00000196620
UGT2B17	0	.	GRCh37	4	69403575	69403575	+	Missense_Mutation	SNP	G	G	A	rs770680304	.	CHOL		TCGA-ZH-A8Y5-01A-11D-A417-09	TCGA-ZH-A8Y5-10A-01D-A41A-09	G	G	.	.	.	.	.	.	.	.	.	.	.	.	.	.	.	c.1361C>T	p.Pro454Leu	p.P454L	ENST00000317746	6/6	53	9	43	55	55	0	UGT2B17,missense_variant,p.Pro454Leu,ENST00000317746,;	A	ENSG00000197888
UGT3A1	0	.	GRCh37	5	35965666	35965666	+	Missense_Mutation	SNP	T	T	C	novel	.	CHOL		TCGA-W5-AA2Q-01A-11D-A417-09	TCGA-W5-AA2Q-10A-01D-A41A-09	T	T	.	.	.	.	.	.	.	.	.	.	.	.	.	.	.	c.665A>G	p.Asp222Gly	p.D222G	ENST00000274278	4/7	53	27	26	109	109	0	UGT3A1,missense_variant,p.Asp222Gly,ENST00000274278,;UGT3A1,missense_variant,p.Asp188Gly,ENST00000507113,;UGT3A1,missense_variant,p.Asp168Gly,ENST00000333811,;UGT3A1,missense_variant,p.Asp222Gly,ENST00000503189,;UGT3A1,intron_variant,,ENST00000513233,;UGT3A1,3_prime_UTR_variant,,ENST00000515801,;	C	ENSG00000145626
[truncated: 66 more columns]

## Sheet: COAD
Hugo_Symbol	Entrez_Gene_Id	Center	NCBI_Build	Chromosome	Start_Position	End_Position	Strand	Variant_Classification	Variant_Type	Reference_Allele	Tumor_Seq_Allele1	Tumor_Seq_Allele2	dbSNP_RS	dbSNP_Val_Status	TCGA Cancer type		Tumor_Sample_Barcode	Matched_Norm_Sample_Barcode	Match_Norm_Seq_Allele1	Match_Norm_Seq_Allele2	Tumor_Validation_Allele1	Tumor_Validation_Allele2	Match_Norm_Validation_Allele1	Match_Norm_Validation_Allele2	Verification_Status	Validation_Status	Mutation_Status	Sequencing_Phase	Sequence_Source	Validation_Method	Score	BAM_File	Sequencer	Tumor_Sample_UUID	Matched_Norm_Sample_UUID	HGVSc	HGVSp	HGVSp_Short	Transcript_ID	Exon_Number	t_depth	t_ref_count	t_alt_count	n_depth	n_ref_count	n_alt_count	all_effects	Allele	Gene
UGT1A10	0	.	GRCh37	2	234676935	234676935	+	Missense_Mutation	SNP	G	G	A	.	.	COAD		TCGA-AA-3715-01A-01W-0900-09	TCGA-AA-3715-10A-01W-0900-09	G	G	.	.	.	.	.	.	.	.	.	.	.	.	.	.	.	c.1145G>A	p.Gly382Asp	p.G382D	ENST00000344644	4/5	323	274	49	162	162	0	UGT1A10,missense_variant,p.Gly382Asp,ENST00000373445,;UGT1A4,missense_variant,p.Gly386Asp,ENST00000373409,;UGT1A6,missense_variant,p.Gly384Asp,ENST00000305139,;UGT1A3,missense_variant,p.Gly386Asp,ENST00000482026,;UGT1A6,missense_variant,p.Gly117Asp,ENST00000373424,;UGT1A8,missense_variant,p.Gly385Asp,ENST00000608383,;UGT1A8,missense_variant,p.Gly386Asp,ENST00000608381,;UGT1A7,missense_variant,p.G…	A	ENSG00000242515
UGT1A10	0	.	GRCh37	2	234676937	234676937	+	Missense_Mutation	SNP	G	G	A	rs143573365	.	COAD		TCGA-AA-A01P-01A-21D-A17O-10	TCGA-AA-A01P-11A-11D-A17O-10	G	G	.	.	.	.	.	.	.	.	.	.	.	.	.	.	.	c.1147G>A	p.Val383Ile	p.V383I	ENST00000344644	4/5	235	183	52	257	257	0	UGT1A10,missense_variant,p.Val383Ile,ENST00000373445,;UGT1A4,missense_variant,p.Val387Ile,ENST00000373409,;UGT1A6,missense_variant,p.Val385Ile,ENST00000305139,;UGT1A3,missense_variant,p.Val387Ile,ENST00000482026,;UGT1A6,missense_variant,p.Val118Ile,ENST00000373424,;UGT1A8,missense_variant,p.Val386Ile,ENST00000608383,;UGT1A8,missense_variant,p.Val387Ile,ENST00000608381,;UGT1A7,missense_variant,p.V…	A	ENSG00000242515
UGT1A10	0	.	GRCh37	2	234675807	234675807	+	Missense_Mutation	SNP	A	A	C	rs72551348	.	COAD		TCGA-AY-4070-01A-01W-1073-09	TCGA-AY-4070-10A-01W-1073-09	A	A	.	.	.	.	.	.	.	.	.	.	.	.	.	.	.	c.983A>C	p.Gln328Pro	p.Q328P	ENST00000344644	2/5	273	245	28	278	278	0	UGT1A10,missense_variant,p.Gln328Pro,ENST00000373445,;UGT1A4,missense_variant,p.Gln332Pro,ENST00000373409,;UGT1A6,missense_variant,p.Gln330Pro,ENST00000305139,;UGT1A3,missense_variant,p.Gln332Pro,ENST00000482026,;UGT1A6,missense_variant,p.Gln63Pro,ENST00000373424,;UGT1A8,missense_variant,p.Gln331Pro,ENST00000608383,;UGT1A8,missense_variant,p.Gln332Pro,ENST00000608381,;UGT1A7,missense_variant,p.Gl…	C	ENSG00000242515
UGT1A10	0	.	GRCh37	2	234545609	234545609	+	Silent	SNP	G	G	C	rs766629881	.	COAD		TCGA-CM-4752-01A-01D-1408-10	TCGA-CM-4752-10A-01D-1408-10	G	G	.	.	.	.	.	.	.	.	.	.	.	.	.	.	.	c.441G>C	p.%3D	p.L147L	ENST00000344644	1/5	186	146	39	115	114	0	UGT1A10,synonymous_variant,p.%3D,ENST00000373445,;UGT1A10,synonymous_variant,p.%3D,ENST00000344644,;UGT1A8,intron_variant,,ENST00000373450,;	C	ENSG00000242515
UGT1A10	0	.	GRCh37	2	234675783	234675783	+	Missense_Mutation	SNP	C	C	A	rs761316504	.	COAD		TCGA-D5-6537-01A-11D-1719-10	TCGA-D5-6537-10A-01D-1719-10	C	C	.	.	.	.	.	.	.	.	.	.	.	.	.	.	.	c.959C>A	p.Ala320Asp	p.A320D	ENST00000344644	2/5	131	58	73	70	70	0	UGT1A10,missense_variant,p.Ala320Asp,ENST00000373445,;UGT1A4,missense_variant,p.Ala324Asp,ENST00000373409,;UGT1A6,missense_variant,p.Ala322Asp,ENST00000305139,;UGT1A3,missense_variant,p.Ala324Asp,ENST00000482026,;UGT1A6,missense_variant,p.Ala55Asp,ENST00000373424,;UGT1A8,missense_variant,p.Ala323Asp,ENST00000608383,;UGT1A8,missense_variant,p.Ala324Asp,ENST00000608381,;UGT1A7,missense_variant,p.Al…	A	ENSG00000242515
UGT1A10	0	.	GRCh37	2	234545744	234545744	+	Silent	SNP	T	T	C	novel	.	COAD		TCGA-WS-AB45-01A-11D-A40P-10	TCGA-WS-AB45-10A-01D-A40P-10	T	T	.	.	.	.	.	.	.	.	.	.	.	.	.	.	.	c.576T>C	p.%3D	p.N192N	ENST00000344644	1/5	105	81	24	143	143	0	UGT1A10,synonymous_variant,p.%3D,ENST00000373445,;UGT1A10,synonymous_variant,p.%3D,ENST00000344644,;UGT1A8,intron_variant,,ENST00000373450,;	C	ENSG00000242515
UGT1A10	0	.	GRCh37	2	234676937	234676937	+	Missense_Mutation	SNP	G	G	A	rs143573365	.	COAD		TCGA-WS-AB45-01A-11D-A40P-10	TCGA-WS-AB45-10A-01D-A40P-10	G	G	.	.	.	.	.	.	.	.	.	.	.	.	.	.	.	c.1147G>A	p.Val383Ile	p.V383I	ENST00000344644	4/5	107	91	15	131	131	0	UGT1A10,missense_variant,p.Val383Ile,ENST00000373445,;UGT1A4,missense_variant,p.Val387Ile,ENST00000373409,;UGT1A6,missense_variant,p.Val385Ile,ENST00000305139,;UGT1A3,missense_variant,p.Val387Ile,ENST00000482026,;UGT1A6,missense_variant,p.Val118Ile,ENST00000373424,;UGT1A8,missense_variant,p.Val386Ile,ENST00000608383,;UGT1A8,missense_variant,p.Val387Ile,ENST00000608381,;UGT1A7,missense_variant,p.V…	A	ENSG00000242515
UGT1A3	0	.	GRCh37	2	234637988	234637988	+	Missense_Mutation	SNP	G	G	T	rs368262266	.	COAD		TCGA-AA-3977-01A-01W-0995-10	TCGA-AA-3977-10A-01W-1982-10	G	G	.	.	.	.	.	.	.	.	.	.	.	.	.	.	.	c.216G>T	p.Glu72Asp	p.E72D	ENST00000482026	1/5	16	8	8	139	139	0	UGT1A3,missense_variant,p.Glu72Asp,ENST00000482026,;UGT1A8,missense_variant,p.Glu72Asp,ENST00000609767,;UGT1A10,intron_variant,,ENST00000373445,;UGT1A4,intron_variant,,ENST00000373409,;UGT1A6,intron_variant,,ENST00000305139,;UGT1A6,intron_variant,,ENST00000373424,;UGT1A8,intron_variant,,ENST00000608381,;UGT1A7,intron_variant,,ENST00000373426,;UGT1A8,intron_variant,,ENST00000609637,;UGT1A5,intron_…	T	ENSG00000243135
UGT1A3	0	.	GRCh37	2	234637983	234637983	+	Nonsense_Mutation	SNP	G	G	T	rs775234844	.	COAD		TCGA-AA-A00N-01A-02D-A17O-10	TCGA-AA-A00N-10A-01D-A17O-10	G	G	.	.	.	.	.	.	.	.	.	.	.	.	.	.	.	c.211G>T	p.Glu71Ter	p.E71*	ENST00000482026	1/5	130	105	25	273	272	0	UGT1A3,stop_gained,p.Glu71Ter,ENST00000482026,;UGT1A8,stop_gained,p.Glu71Ter,ENST00000609767,;UGT1A10,intron_variant,,ENST00000373445,;UGT1A4,intron_variant,,ENST00000373409,;UGT1A6,intron_variant,,ENST00000305139,;UGT1A6,intron_variant,,ENST00000373424,;UGT1A8,intron_variant,,ENST00000608381,;UGT1A7,intron_variant,,ENST00000373426,;UGT1A8,intron_variant,,ENST00000609637,;UGT1A5,intron_variant,,E…	T	ENSG00000243135
UGT1A3	0	.	GRCh37	2	234637957	234637957	+	Frame_Shift_Del	DEL	C	C	-	rs367893745	.	COAD		TCGA-AY-6197-01A-11D-1719-10	TCGA-AY-6197-10A-01D-1719-10	C	C	.	.	.	.	.	.	.	.	.	.	.	.	.	.	.	c.188delC	p.Pro63GlnfsTer3	p.P63Qfs*3	ENST00000482026	1/5	282	201	81	79	79	0	UGT1A3,frameshift_variant,p.Pro63GlnfsTer3,ENST00000482026,;UGT1A8,frameshift_variant,p.Pro63GlnfsTer3,ENST00000609767,;UGT1A10,intron_variant,,ENST00000373445,;UGT1A4,intron_variant,,ENST00000373409,;UGT1A6,intron_variant,,ENST00000305139,;UGT1A6,intron_variant,,ENST00000373424,;UGT1A8,intron_variant,,ENST00000608381,;UGT1A7,intron_variant,,ENST00000373426,;UGT1A8,intron_variant,,ENST00000609637…	-	ENSG00000243135
UGT1A3	0	.	GRCh37	2	234638523	234638523	+	Missense_Mutation	SNP	C	C	T	novel	.	COAD		TCGA-WS-AB45-01A-11D-A40P-10	TCGA-WS-AB45-10A-01D-A40P-10	C	C	.	.	.	.	.	.	.	.	.	.	.	.	.	.	.	c.751C>T	p.His251Tyr	p.H251Y	ENST00000482026	1/5	84	73	11	112	112	0	UGT1A3,missense_variant,p.His251Tyr,ENST00000482026,;UGT1A8,missense_variant,p.His251Tyr,ENST00000609767,;UGT1A10,intron_variant,,ENST00000373445,;UGT1A4,intron_variant,,ENST00000373409,;UGT1A6,intron_variant,,ENST00000305139,;UGT1A6,intron_variant,,ENST00000373424,;UGT1A8,intron_variant,,ENST00000608381,;UGT1A7,intron_variant,,ENST00000373426,;UGT1A8,intron_variant,,ENST00000609637,;UGT1A5,intro…	T	ENSG00000243135
UGT1A4	0	.	GRCh37	2	234681161	234681161	+	Frame_Shift_Del	DEL	A	A	-	rs553499095	.	COAD		TCGA-AA-3663-01A-01D-1719-10	TCGA-AA-3663-11A-01D-1719-10	A	A	.	.	.	.	.	.	.	.	.	.	.	.	.	.	.	c.1566delA	p.Arg524GlufsTer22	p.R524Efs*22	ENST00000373409	5/5	279	186	93	102	102	0	UGT1A4,frameshift_variant,p.Arg524GlufsTer22,ENST00000373409,;UGT1A6,frameshift_variant,p.Arg522GlufsTer22,ENST00000305139,;UGT1A3,frameshift_variant,p.Arg524GlufsTer22,ENST00000482026,;UGT1A6,frameshift_variant,p.Arg255GlufsTer22,ENST00000373424,;UGT1A8,frameshift_variant,p.Arg523GlufsTer?,ENST00000608383,;UGT1A8,frameshift_variant,p.Arg524GlufsTer22,ENST00000608381,;UGT1A7,frameshift_variant,p.…	-	ENSG00000244474
UGT1A4	0	.	GRCh37	2	234627442	234627442	+	5'UTR	SNP	T	T	C	novel	.	COAD		TCGA-AA-3672-01A-01W-0900-09	TCGA-AA-3672-10A-01W-0900-09	T	T	.	.	.	.	.	.	.	.	.	.	.	.	.	.	.	c.-25T>C	.	.	ENST00000373409	1/5	49	32	17	65	65	0	UGT1A4,5_prime_UTR_variant,,ENST00000373409,;UGT1A10,intron_variant,,ENST00000373445,;UGT1A6,intron_variant,,ENST00000305139,;UGT1A6,intron_variant,,ENST00000373424,;UGT1A8,intron_variant,,ENST00000608381,;UGT1A7,intron_variant,,ENST00000373426,;UGT1A8,intron_variant,,ENST00000609637,;UGT1A5,intron_variant,,ENST00000373414,;UGT1A6,intron_variant,,ENST00000406651,;UGT1A10,intron_variant,,ENST00000…	C	ENSG00000244474
UGT1A4	0	.	GRCh37	2	234628118	234628118	+	Missense_Mutation	SNP	C	C	G	.	.	COAD		TCGA-AA-3712-01A-21D-1719-10	TCGA-AA-3712-11A-01D-1719-10	C	C	.	.	.	.	.	.	.	.	.	.	.	.	.	.	.	c.652C>G	p.Leu218Val	p.L218V	ENST00000373409	1/5	363	283	79	167	167	0	UGT1A4,missense_variant,p.Leu218Val,ENST00000373409,;UGT1A10,intron_variant,,ENST00000373445,;UGT1A6,intron_variant,,ENST00000305139,;UGT1A6,intron_variant,,ENST00000373424,;UGT1A8,intron_variant,,ENST00000608381,;UGT1A7,intron_variant,,ENST00000373426,;UGT1A8,intron_variant,,ENST00000609637,;UGT1A5,intron_variant,,ENST00000373414,;UGT1A6,intron_variant,,ENST00000406651,;UGT1A10,intron_variant,,E…	G	ENSG00000244474
UGT1A4	0	.	GRCh37	2	234680980	234680980	+	Silent	SNP	G	G	A	novel	.	COAD		TCGA-AA-3952-01A-01W-0995-10	TCGA-AA-3952-10A-01W-0995-10	G	G	.	.	.	.	.	.	.	.	.	.	.	.	.	.	.	c.1380G>A	p.%3D	p.V460V	ENST00000373409	5/5	72	65	6	113	113	0	UGT1A4,synonymous_variant,p.%3D,ENST00000373409,;UGT1A6,synonymous_variant,p.%3D,ENST00000305139,;UGT1A3,synonymous_variant,p.%3D,ENST00000482026,;UGT1A6,synonymous_variant,p.%3D,ENST00000373424,;UGT1A8,synonymous_variant,p.%3D,ENST00000608383,;UGT1A8,synonymous_variant,p.%3D,ENST00000608381,;UGT1A7,synonymous_variant,p.%3D,ENST00000373426,;UGT1A8,synonymous_variant,p.%3D,ENST00000609637,;UGT1A8,…	A	ENSG00000244474
UGT1A4	0	.	GRCh37	2	234628080	234628080	+	Missense_Mutation	SNP	T	T	C	.	.	COAD		TCGA-AA-3989-01A-01W-0995-10	TCGA-AA-3989-10A-01W-0999-10	T	T	.	.	.	.	.	.	.	.	.	.	.	.	.	.	.	c.614T>C	p.Met205Thr	p.M205T	ENST00000373409	1/5	126	91	35	133	132	1	UGT1A4,missense_variant,p.Met205Thr,ENST00000373409,;UGT1A10,intron_variant,,ENST00000373445,;UGT1A6,intron_variant,,ENST00000305139,;UGT1A6,intron_variant,,ENST00000373424,;UGT1A8,intron_variant,,ENST00000608381,;UGT1A7,intron_variant,,ENST00000373426,;UGT1A8,intron_variant,,ENST00000609637,;UGT1A5,intron_variant,,ENST00000373414,;UGT1A6,intron_variant,,ENST00000406651,;UGT1A10,intron_variant,,E…	C	ENSG00000244474
UGT1A4	0	.	GRCh37	2	234680928	234680928	+	Missense_Mutation	SNP	G	G	A	rs748166510	.	COAD		TCGA-AZ-6598-01A-11D-1771-10	TCGA-AZ-6598-11A-01D-1771-10	G	G	.	.	.	.	.	.	.	.	.	.	.	.	.	.	.	c.1328G>A	p.Arg443His	p.R443H	ENST00000373409	5/5	129	109	20	92	92	0	UGT1A4,missense_variant,p.Arg443His,ENST00000373409,;UGT1A6,missense_variant,p.Arg441His,ENST00000305139,;UGT1A3,missense_variant,p.Arg443His,ENST00000482026,;UGT1A6,missense_variant,p.Arg174His,ENST00000373424,;UGT1A8,missense_variant,p.Arg442His,ENST00000608383,;UGT1A8,missense_variant,p.Arg443His,ENST00000608381,;UGT1A7,missense_variant,p.Arg439His,ENST00000373426,;UGT1A8,missense_variant,p.Ar…	A	ENSG00000244474
UGT1A4	0	.	GRCh37	2	234681074	234681074	+	Missense_Mutation	SNP	G	G	A	rs747543462	.	COAD		TCGA-AZ-6601-01A-11D-1771-10	TCGA-AZ-6601-11A-01D-1771-10	G	G	.	.	.	.	.	.	.	.	.	.	.	.	.	.	.	c.1474G>A	p.Val492Met	p.V492M	ENST00000373409	5/5	284	222	61	218	218	0	UGT1A4,missense_variant,p.Val492Met,ENST00000373409,;UGT1A6,missense_variant,p.Val490Met,ENST00000305139,;UGT1A3,missense_variant,p.Val492Met,ENST00000482026,;UGT1A6,missense_variant,p.Val223Met,ENST00000373424,;UGT1A8,missense_variant,p.Val491Met,ENST00000608383,;UGT1A8,missense_variant,p.Val492Met,ENST00000608381,;UGT1A7,missense_variant,p.Val488Met,ENST00000373426,;UGT1A8,missense_variant,p.Va…	A	ENSG00000244474
UGT1A4	0	.	GRCh37	2	234627977	234627977	+	Frame_Shift_Del	DEL	T	T	-	rs780658532	.	COAD		TCGA-CK-6746-01A-11D-1835-10	TCGA-CK-6746-10A-01D-1835-10	T	T	.	.	.	.	.	.	.	.	.	.	.	.	.	.	.	c.517delT	p.Trp173GlyfsTer8	p.W173Gfs*8	ENST00000373409	1/5	261	181	80	209	209	0	UGT1A4,frameshift_variant,p.Trp173GlyfsTer8,ENST00000373409,;UGT1A10,intron_variant,,ENST00000373445,;UGT1A6,intron_variant,,ENST00000305139,;UGT1A6,intron_variant,,ENST00000373424,;UGT1A8,intron_variant,,ENST00000608381,;UGT1A7,intron_variant,,ENST00000373426,;UGT1A8,intron_variant,,ENST00000609637,;UGT1A5,intron_variant,,ENST00000373414,;UGT1A6,intron_variant,,ENST00000406651,;UGT1A10,intron_va…	-	ENSG00000244474
UGT1A4	0	.	GRCh37	2	234627573	234627573	+	Missense_Mutation	SNP	C	C	T	rs149779946	.	COAD		TCGA-D5-6530-01A-11D-1719-10	TCGA-D5-6530-10A-01D-1719-10	C	C	.	.	.	.	.	.	.	.	.	.	.	.	.	.	.	c.107C>T	p.Thr36Ile	p.T36I	ENST00000373409	1/5	358	218	139	28	28	0	UGT1A4,missense_variant,p.Thr36Ile,ENST00000373409,;UGT1A10,intron_variant,,ENST00000373445,;UGT1A6,intron_variant,,ENST00000305139,;UGT1A6,intron_variant,,ENST00000373424,;UGT1A8,intron_variant,,ENST00000608381,;UGT1A7,intron_variant,,ENST00000373426,;UGT1A8,intron_variant,,ENST00000609637,;UGT1A5,intron_variant,,ENST00000373414,;UGT1A6,intron_variant,,ENST00000406651,;UGT1A10,intron_variant,,EN…	T	ENSG00000244474
UGT1A4	0	.	GRCh37	2	234627926	234627926	+	Missense_Mutation	SNP	G	G	A	rs762367100	.	COAD		TCGA-D5-6927-01A-21D-1924-10	TCGA-D5-6927-10A-01D-1924-10	G	G	.	.	.	.	.	.	.	.	.	.	.	.	.	.	.	c.460G>A	p.Val154Ile	p.V154I	ENST00000373409	1/5	294	211	83	185	185	0	UGT1A4,missense_variant,p.Val154Ile,ENST00000373409,;UGT1A10,intron_variant,,ENST00000373445,;UGT1A6,intron_variant,,ENST00000305139,;UGT1A6,intron_variant,,ENST00000373424,;UGT1A8,intron_variant,,ENST00000608381,;UGT1A7,intron_variant,,ENST00000373426,;UGT1A8,intron_variant,,ENST00000609637,;UGT1A5,intron_variant,,ENST00000373414,;UGT1A6,intron_variant,,ENST00000406651,;UGT1A10,intron_variant,,E…	A	ENSG00000244474
UGT1A4	0	.	GRCh37	2	234681161	234681161	+	Frame_Shift_Del	DEL	A	A	-	rs553499095	.	COAD		TCGA-G4-6628-01A-11D-1835-10	TCGA-G4-6628-10A-01D-1835-10	A	A	.	.	.	.	.	.	.	.	.	.	.	.	.	.	.	c.1566delA	p.Arg524GlufsTer22	p.R524Efs*22	ENST00000373409	5/5	122	106	16	72	72	0	UGT1A4,frameshift_variant,p.Arg524GlufsTer22,ENST00000373409,;UGT1A6,frameshift_variant,p.Arg522GlufsTer22,ENST00000305139,;UGT1A3,frameshift_variant,p.Arg524GlufsTer22,ENST00000482026,;UGT1A6,frameshift_variant,p.Arg255GlufsTer22,ENST00000373424,;UGT1A8,frameshift_variant,p.Arg523GlufsTer?,ENST00000608383,;UGT1A8,frameshift_variant,p.Arg524GlufsTer22,ENST00000608381,;UGT1A7,frameshift_variant,p.…	-	ENSG00000244474
UGT1A4	0	.	GRCh37	2	234681161	234681161	+	Frame_Shift_Del	DEL	A	A	-	rs553499095	.	COAD		TCGA-WS-AB45-01A-11D-A40P-10	TCGA-WS-AB45-10A-01D-A40P-10	A	A	.	.	.	.	.	.	.	.	.	.	.	.	.	.	.	c.1566delA	p.Arg524GlufsTer22	p.R524Efs*22	ENST00000373409	5/5	114	103	10	122	121	0	UGT1A4,frameshift_variant,p.Arg524GlufsTer22,ENST00000373409,;UGT1A6,frameshift_variant,p.Arg522GlufsTer22,ENST00000305139,;UGT1A3,frameshift_variant,p.Arg524GlufsTer22,ENST00000482026,;UGT1A6,frameshift_variant,p.Arg255GlufsTer22,ENST00000373424,;UGT1A8,frameshift_variant,p.Arg523GlufsTer?,ENST00000608383,;UGT1A8,frameshift_variant,p.Arg524GlufsTer22,ENST00000608381,;UGT1A7,frameshift_variant,p.…	-	ENSG00000244474
UGT1A5	0	.	GRCh37	2	234621647	234621647	+	Nonsense_Mutation	SNP	G	G	T	novel	.	COAD		TCGA-A6-6781-01A-22D-A270-10	TCGA-A6-6781-10A-01D-A270-10	G	G	.	.	.	.	.	.	.	.	.	.	.	.	.	.	.	c.10G>T	p.Gly4Ter	p.G4*	ENST00000373414	1/5	84	67	16	96	96	0	UGT1A8,stop_gained,p.Gly4Ter,ENST00000608381,;UGT1A5,stop_gained,p.Gly4Ter,ENST00000373414,;UGT1A10,intron_variant,,ENST00000373445,;UGT1A6,intron_variant,,ENST00000305139,;UGT1A6,intron_variant,,ENST00000373424,;UGT1A7,intron_variant,,ENST00000373426,;UGT1A8,intron_variant,,ENST00000609637,;UGT1A6,intron_variant,,ENST00000406651,;UGT1A10,intron_variant,,ENST00000344644,;UGT1A8,intron_variant,,EN…	T	ENSG00000240224
UGT1A5	0	.	GRCh37	2	234621853	234621853	+	Missense_Mutation	SNP	G	G	T	rs757096232	.	COAD		TCGA-AA-3510-01A-01D-1408-10	TCGA-AA-3510-11A-01D-1408-10	G	G	.	.	.	.	.	.	.	.	.	.	.	.	.	.	.	c.216G>T	p.Glu72Asp	p.E72D	ENST00000373414	1/5	98	74	24	49	49	0	UGT1A8,missense_variant,p.Glu72Asp,ENST00000608381,;UGT1A5,missense_variant,p.Glu72Asp,ENST00000373414,;UGT1A10,intron_variant,,ENST00000373445,;UGT1A6,intron_variant,,ENST00000305139,;UGT1A6,intron_variant,,ENST00000373424,;UGT1A7,intron_variant,,ENST00000373426,;UGT1A8,intron_variant,,ENST00000609637,;UGT1A6,intron_variant,,ENST00000406651,;UGT1A10,intron_variant,,ENST00000344644,;UGT1A8,intron…	T	ENSG00000240224
UGT1A5	0	.	GRCh37	2	234621669	234621669	+	Missense_Mutation	SNP	A	A	G	rs576086579	.	COAD		TCGA-AA-3861-01A-01W-0995-10	TCGA-AA-3861-10A-01W-0995-10	A	A	.	.	.	.	.	.	.	.	.	.	.	.	.	.	.	c.32A>G	p.Gln11Arg	p.Q11R	ENST00000373414	1/5	196	181	14	26	25	1	UGT1A8,missense_variant,p.Gln11Arg,ENST00000608381,;UGT1A5,missense_variant,p.Gln11Arg,ENST00000373414,;UGT1A10,intron_variant,,ENST00000373445,;UGT1A6,intron_variant,,ENST00000305139,;UGT1A6,intron_variant,,ENST00000373424,;UGT1A7,intron_variant,,ENST00000373426,;UGT1A8,intron_variant,,ENST00000609637,;UGT1A6,intron_variant,,ENST00000406651,;UGT1A10,intron_variant,,ENST00000344644,;UGT1A8,intron…	G	ENSG00000240224
UGT1A5	0	.	GRCh37	2	234622166	234622166	+	Missense_Mutation	SNP	C	C	T	.	.	COAD		TCGA-AZ-6598-01A-11D-1771-10	TCGA-AZ-6598-11A-01D-1771-10	C	C	.	.	.	.	.	.	.	.	.	.	.	.	.	.	.	c.529C>T	p.Pro177Ser	p.P177S	ENST00000373414	1/5	341	221	120	226	226	0	UGT1A8,missense_variant,p.Pro177Ser,ENST00000608381,;UGT1A5,missense_variant,p.Pro177Ser,ENST00000373414,;UGT1A10,intron_variant,,ENST00000373445,;UGT1A6,intron_variant,,ENST00000305139,;UGT1A6,intron_variant,,ENST00000373424,;UGT1A7,intron_variant,,ENST00000373426,;UGT1A8,intron_variant,,ENST00000609637,;UGT1A6,intron_variant,,ENST00000406651,;UGT1A10,intron_variant,,ENST00000344644,;UGT1A8,intr…	T	ENSG00000240224
UGT1A5	0	.	GRCh37	2	234622332	234622332	+	Missense_Mutation	SNP	C	C	T	rs369685158,rs779646185	.	COAD		TCGA-CK-4951-01A-01D-1408-10	TCGA-CK-4951-10A-01D-2188-10	C	C	.	.	.	.	.	.	.	.	.	.	.	.	.	.	.	c.695C>T	p.Ala232Val	p.A232V	ENST00000373414	1/5	140	101	38	250	250	0	UGT1A8,missense_variant,p.Ala232Val,ENST00000608381,;UGT1A5,missense_variant,p.Ala232Val,ENST00000373414,;UGT1A10,intron_variant,,ENST00000373445,;UGT1A6,intron_variant,,ENST00000305139,;UGT1A6,intron_variant,,ENST00000373424,;UGT1A7,intron_variant,,ENST00000373426,;UGT1A8,intron_variant,,ENST00000609637,;UGT1A6,intron_variant,,ENST00000406651,;UGT1A10,intron_variant,,ENST00000344644,;UGT1A8,intr…	T	ENSG00000240224
UGT1A6	0	.	GRCh37	2	234601919	234601919	+	Missense_Mutation	SNP	G	G	A	rs147761911	.	COAD		TCGA-A6-6781-01A-22D-A270-10	TCGA-A6-6781-10A-01D-A270-10	G	G	.	.	.	.	.	.	.	.	.	.	.	.	.	.	.	c.269G>A	p.Arg90His	p.R90H	ENST00000305139	1/5	80	52	27	76	76	0	UGT1A6,missense_variant,p.Arg90His,ENST00000441351,;UGT1A6,missense_variant,p.Arg90His,ENST00000305139,;UGT1A10,intron_variant,,ENST00000373445,;UGT1A6,intron_variant,,ENST00000373424,;UGT1A7,intron_variant,,ENST00000373426,;UGT1A8,intron_variant,,ENST00000609637,;UGT1A10,intron_variant,,ENST00000344644,;UGT1A8,intron_variant,,ENST00000373450,;UGT1A9,intron_variant,,ENST00000354728,;UGT1A7,downst…	A	ENSG00000167165
UGT1A6	0	.	GRCh37	2	234602181	234602181	+	Silent	SNP	C	C	T	.	.	COAD		TCGA-AZ-6598-01A-11D-1771-10	TCGA-AZ-6598-11A-01D-1771-10	C	C	.	.	.	.	.	.	.	.	.	.	.	.	.	.	.	c.531C>T	p.%3D	p.S177S	ENST00000305139	1/5	148	119	28	99	99	0	UGT1A6,synonymous_variant,p.%3D,ENST00000441351,;UGT1A6,synonymous_variant,p.%3D,ENST00000305139,;UGT1A10,intron_variant,,ENST00000373445,;UGT1A6,intron_variant,,ENST00000373424,;UGT1A7,intron_variant,,ENST00000373426,;UGT1A8,intron_variant,,ENST00000609637,;UGT1A10,intron_variant,,ENST00000344644,;UGT1A8,intron_variant,,ENST00000373450,;UGT1A9,intron_variant,,ENST00000354728,;UGT1A7,downstream_g…	T	ENSG00000167165
UGT1A6	0	.	GRCh37	2	234601855	234601855	+	Nonsense_Mutation	SNP	G	G	T	.	.	COAD		TCGA-CA-6718-01A-11D-1835-10	TCGA-CA-6718-10A-01D-1835-10	G	G	.	.	.	.	.	.	.	.	.	.	.	.	.	.	.	c.205G>T	p.Glu69Ter	p.E69*	ENST00000305139	1/5	72	60	12	82	82	0	UGT1A6,stop_gained,p.Glu69Ter,ENST00000441351,;UGT1A6,stop_gained,p.Glu69Ter,ENST00000305139,;UGT1A10,intron_variant,,ENST00000373445,;UGT1A6,intron_variant,,ENST00000373424,;UGT1A7,intron_variant,,ENST00000373426,;UGT1A8,intron_variant,,ENST00000609637,;UGT1A10,intron_variant,,ENST00000344644,;UGT1A8,intron_variant,,ENST00000373450,;UGT1A9,intron_variant,,ENST00000354728,;UGT1A7,downstream_gene_…	T	ENSG00000167165
UGT1A6	0	.	GRCh37	2	234601668	234601668	+	Silent	SNP	C	C	T	rs773410698	.	COAD		TCGA-G4-6302-01A-11D-1719-10	TCGA-G4-6302-11A-01D-1719-10	C	C	.	.	.	.	.	.	.	.	.	.	.	.	.	.	.	c.18C>T	p.%3D	p.R6R	ENST00000305139	1/5	436	410	26	132	132	0	UGT1A6,synonymous_variant,p.%3D,ENST00000441351,;UGT1A6,synonymous_variant,p.%3D,ENST00000305139,;UGT1A10,intron_variant,,ENST00000373445,;UGT1A6,intron_variant,,ENST00000373424,;UGT1A7,intron_variant,,ENST00000373426,;UGT1A8,intron_variant,,ENST00000609637,;UGT1A10,intron_variant,,ENST00000344644,;UGT1A8,intron_variant,,ENST00000373450,;UGT1A9,intron_variant,,ENST00000354728,;UGT1A7,downstream_g…	T	ENSG00000167165
UGT1A6	0	.	GRCh37	2	234602021	234602021	+	Missense_Mutation	SNP	T	T	C	rs372477458	.	COAD		TCGA-G4-6586-01A-11D-1771-10	TCGA-G4-6586-10A-01D-1771-10	T	T	.	.	.	.	.	.	.	.	.	.	.	.	.	.	.	c.371T>C	p.Ile124Thr	p.I124T	ENST00000305139	1/5	66	47	19	97	97	0	UGT1A6,missense_variant,p.Ile124Thr,ENST00000441351,;UGT1A6,missense_variant,p.Ile124Thr,ENST00000305139,;UGT1A10,intron_variant,,ENST00000373445,;UGT1A6,intron_variant,,ENST00000373424,;UGT1A7,intron_variant,,ENST00000373426,;UGT1A8,intron_variant,,ENST00000609637,;UGT1A10,intron_variant,,ENST00000344644,;UGT1A8,intron_variant,,ENST00000373450,;UGT1A9,intron_variant,,ENST00000354728,;UGT1A7,down…	C	ENSG00000167165
UGT1A7	0	.	GRCh37	2	234590941	234590941	+	Frame_Shift_Del	DEL	T	T	-	.	.	COAD		TCGA-AA-3947-01A-01D-1981-10	TCGA-AA-3947-10A-01D-1982-10	T	T	.	.	.	.	.	.	.	.	.	.	.	.	.	.	.	c.364delT	p.Ser122GlnfsTer12	p.S122Qfs*12	ENST00000373426	1/5	180	166	14	190	190	0	UGT1A7,frameshift_variant,p.Ser122GlnfsTer12,ENST00000373426,;UGT1A10,intron_variant,,ENST00000373445,;UGT1A10,intron_variant,,ENST00000344644,;UGT1A8,intron_variant,,ENST00000373450,;UGT1A8,intron_variant,,ENST00000609637,;UGT1A9,intron_variant,,ENST00000354728,;UGT1A7,upstream_gene_variant,,ENST00000485022,;	-	ENSG00000244122
UGT1A7	0	.	GRCh37	2	234591344	234591344	+	Missense_Mutation	SNP	G	G	A	rs144940363	.	COAD		TCGA-AA-A00N-01A-02D-A17O-10	TCGA-AA-A00N-10A-01D-A17O-10	G	G	.	.	.	.	.	.	.	.	.	.	.	.	.	.	.	c.761G>A	p.Arg254Gln	p.R254Q	ENST00000373426	1/5	153	114	39	42	42	0	UGT1A7,missense_variant,p.Arg254Gln,ENST00000373426,;UGT1A7,missense_variant,p.Arg111Gln,ENST00000485022,;UGT1A10,intron_variant,,ENST00000373445,;UGT1A10,intron_variant,,ENST00000344644,;UGT1A8,intron_variant,,ENST00000373450,;UGT1A8,intron_variant,,ENST00000609637,;UGT1A9,intron_variant,,ENST00000354728,;	A	ENSG00000244122
UGT1A7	0	.	GRCh37	2	234590948	234590975	+	Nonsense_Mutation	INS	CAAATTGCAGGAGTTTGTTTAATGACCG	CAAATTGCAGGAGTTTGTTTAATGACCG	TCAAATTGCAGGAGTTTGTTTAAGGACAA	novel	.	COAD		TCGA-CA-6715-01A-21D-1835-10	TCGA-CA-6715-10A-01D-1835-10	CAAATTGCAGGAGTTTGTTTAATGACCG	CAAATTGCAGGAGTTTGTTTAATGACCG	.	.	.	.	.	.	.	.	.	.	.	.	.	.	.	c.365_392delCAAATTGCAGGAGTTTGTTTAATGACCGinsTCAAATTGCAGGAGTTTGTTTAAGGACAA	p.Ser122PhefsTer8	p.S122Ffs*8	ENST00000373426	1/5	75	55	20	82	82	0	UGT1A7,stop_gained,p.Ser122PhefsTer8,ENST00000373426,;UGT1A10,intron_variant,,ENST00000373445,;UGT1A10,intron_variant,,ENST00000344644,;UGT1A8,intron_variant,,ENST00000373450,;UGT1A8,intron_variant,,ENST00000609637,;UGT1A9,intron_variant,,ENST00000354728,;UGT1A7,upstream_gene_variant,,ENST00000485022,;	TCAAATTGCAGGAGTTTGTTTAAGGACAA	ENSG00000244122
UGT1A7	0	.	GRCh37	2	234591181	234591181	+	Missense_Mutation	SNP	G	G	A	rs765046704	.	COAD		TCGA-D5-6928-01A-11D-1924-10	TCGA-D5-6928-10A-01D-1924-10	G	G	.	.	.	.	.	.	.	.	.	.	.	.	.	.	.	c.598G>A	p.Ala200Thr	p.A200T	ENST00000373426	1/5	160	130	29	171	171	0	UGT1A7,missense_variant,p.Ala200Thr,ENST00000373426,;UGT1A7,missense_variant,p.Ala57Thr,ENST00000485022,;UGT1A10,intron_variant,,ENST00000373445,;UGT1A10,intron_variant,,ENST00000344644,;UGT1A8,intron_variant,,ENST00000373450,;UGT1A8,intron_variant,,ENST00000609637,;UGT1A9,intron_variant,,ENST00000354728,;	A	ENSG00000244122
UGT1A7	0	.	GRCh37	2	234591248	234591249	+	Frame_Shift_Ins	INS	-	-	T	.	.	COAD		TCGA-DM-A1D8-01A-11D-A152-10	TCGA-DM-A1D8-10A-01D-A152-10	-	-	.	.	.	.	.	.	.	.	.	.	.	.	.	.	.	c.671dupT	p.Lys225GlnfsTer9	p.K225Qfs*9	ENST00000373426	1/5	317	218	99	206	206	0	UGT1A7,frameshift_variant,p.Lys225GlnfsTer9,ENST00000373426,;UGT1A7,frameshift_variant,p.Lys82GlnfsTer9,ENST00000485022,;UGT1A10,intron_variant,,ENST00000373445,;UGT1A10,intron_variant,,ENST00000344644,;UGT1A8,intron_variant,,ENST00000373450,;UGT1A8,intron_variant,,ENST00000609637,;UGT1A9,intron_variant,,ENST00000354728,;	T	ENSG00000244122
UGT1A7	0	.	GRCh37	2	234590873	234590873	+	Missense_Mutation	SNP	G	G	A	novel	.	COAD		TCGA-NH-A5IV-01A-42D-A36X-10	TCGA-NH-A5IV-10A-01D-A370-10	G	G	.	.	.	.	.	.	.	.	.	.	.	.	.	.	.	c.290G>A	p.Arg97His	p.R97H	ENST00000373426	1/5	88	41	47	77	76	1	UGT1A7,missense_variant,p.Arg97His,ENST00000373426,;UGT1A10,intron_variant,,ENST00000373445,;UGT1A10,intron_variant,,ENST00000344644,;UGT1A8,intron_variant,,ENST00000373450,;UGT1A8,intron_variant,,ENST00000609637,;UGT1A9,intron_variant,,ENST00000354728,;UGT1A7,upstream_gene_variant,,ENST00000485022,;	A	ENSG00000244122
UGT1A7	0	.	GRCh37	2	234591248	234591249	+	Frame_Shift_Ins	INS	-	-	T	.	.	COAD		TCGA-NH-A5IV-01A-42D-A36X-10	TCGA-NH-A5IV-10A-01D-A370-10	-	-	.	.	.	.	.	.	.	.	.	.	.	.	.	.	.	c.671dupT	p.Lys225GlnfsTer9	p.K225Qfs*9	ENST00000373426	1/5	204	167	37	155	155	0	UGT1A7,frameshift_variant,p.Lys225GlnfsTer9,ENST00000373426,;UGT1A7,frameshift_variant,p.Lys82GlnfsTer9,ENST00000485022,;UGT1A10,intron_variant,,ENST00000373445,;UGT1A10,intron_variant,,ENST00000344644,;UGT1A8,intron_variant,,ENST00000373450,;UGT1A8,intron_variant,,ENST00000609637,;UGT1A9,intron_variant,,ENST00000354728,;	T	ENSG00000244122
UGT1A8	0	.	GRCh37	2	234526660	234526660	+	Nonsense_Mutation	SNP	C	C	T	rs763801706	.	COAD		TCGA-A6-5665-01A-01D-1650-10	TCGA-A6-5665-10A-01D-1650-10	C	C	.	.	.	.	.	.	.	.	.	.	.	.	.	.	.	c.307C>T	p.Arg103Ter	p.R103*	ENST00000373450	1/5	308	211	97	441	441	0	UGT1A8,stop_gained,p.Arg103Ter,ENST00000373450,;	T	ENSG00000241635
UGT1A8	0	.	GRCh37	2	234526431	234526431	+	Silent	SNP	G	G	A	.	.	COAD		TCGA-A6-A565-01A-31D-A28G-10	TCGA-A6-A565-10A-01D-A28G-10	G	G	.	.	.	.	.	.	.	.	.	.	.	.	.	.	.	c.78G>A	p.%3D	p.G26G	ENST00000373450	1/5	117	107	10	117	117	0	UGT1A8,synonymous_variant,p.%3D,ENST00000373450,;	A	ENSG00000241635
UGT1A8	0	.	GRCh37	2	234669123	234669123	+	Intron	SNP	G	G	A	rs775184773	.	COAD		TCGA-AA-3947-01A-01D-1981-10	TCGA-AA-3947-10A-01D-1982-10	G	G	.	.	.	.	.	.	.	.	.	.	.	.	.	.	.	c.868-6557G>A	.	.	ENST00000609767	.	193	171	22	223	223	0	UGT1A8,missense_variant,p.Ala64Thr,ENST00000608383,;UGT1A8,missense_variant,p.Ala64Thr,ENST00000360418,;UGT1A1,missense_variant,p.Ala64Thr,ENST00000305208,;UGT1A10,intron_variant,,ENST00000373445,;UGT1A4,intron_variant,,ENST00000373409,;UGT1A6,intron_variant,,ENST00000305139,;UGT1A3,intron_variant,,ENST00000482026,;UGT1A6,intron_variant,,ENST00000373424,;UGT1A8,intron_variant,,ENST00000608381,;UG…	A	ENSG00000241635
UGT1A8	0	.	GRCh37	2	234526505	234526505	+	Frame_Shift_Del	DEL	G	G	-	rs374078976	.	COAD		TCGA-AD-6895-01A-11D-1924-10	TCGA-AD-6895-10A-01D-1924-10	G	G	.	.	.	.	.	.	.	.	.	.	.	.	.	.	.	c.156delG	p.His53MetfsTer5	p.H53Mfs*5	ENST00000373450	1/5	78	59	19	83	83	0	UGT1A8,frameshift_variant,p.His53MetfsTer5,ENST00000373450,;	-	ENSG00000241635
UGT1A8	0	.	GRCh37	2	234526288	234526288	+	5'Flank	SNP	G	G	C	rs564628361	.	COAD		TCGA-CK-5912-01A-11D-1650-10	TCGA-CK-5912-10A-01D-1650-10	G	G	.	.	.	.	.	.	.	.	.	.	.	.	.	.	.	.	.	.	ENST00000373450	.	91	4	87	54	52	1	UGT1A8,upstream_gene_variant,,ENST00000373450,;	C	ENSG00000241635
UGT1A8	0	.	GRCh37	2	234669065	234669065	+	Intron	SNP	T	T	C	.	.	COAD		TCGA-CK-6746-01A-11D-1835-10	TCGA-CK-6746-10A-01D-1835-10	T	T	.	.	.	.	.	.	.	.	.	.	.	.	.	.	.	c.868-6615T>C	.	.	ENST00000609767	.	81	47	34	70	70	0	UGT1A8,synonymous_variant,p.%3D,ENST00000608383,;UGT1A8,synonymous_variant,p.%3D,ENST00000360418,;UGT1A1,synonymous_variant,p.%3D,ENST00000305208,;UGT1A10,intron_variant,,ENST00000373445,;UGT1A4,intron_variant,,ENST00000373409,;UGT1A6,intron_variant,,ENST00000305139,;UGT1A3,intron_variant,,ENST00000482026,;UGT1A6,intron_variant,,ENST00000373424,;UGT1A8,intron_variant,,ENST00000608381,;UGT1A7,intr…	C	ENSG00000241635
UGT1A8	0	.	GRCh37	2	234526894	234526894	+	Missense_Mutation	SNP	G	G	A	novel	.	COAD		TCGA-G4-6628-01A-11D-1835-10	TCGA-G4-6628-10A-01D-1835-10	G	G	.	.	.	.	.	.	.	.	.	.	.	.	.	.	.	c.541G>A	p.Ala181Thr	p.A181T	ENST00000373450	1/5	119	98	21	80	79	1	UGT1A8,missense_variant,p.Ala181Thr,ENST00000373450,;	A	ENSG00000241635
UGT1A8	0	.	GRCh37	2	234526996	234526996	+	Missense_Mutation	SNP	G	G	A	novel	.	COAD		TCGA-NH-A5IV-01A-42D-A36X-10	TCGA-NH-A5IV-10A-01D-A370-10	G	G	.	.	.	.	.	.	.	.	.	.	.	.	.	.	.	c.643G>A	p.Glu215Lys	p.E215K	ENST00000373450	1/5	180	112	68	200	200	0	UGT1A8,missense_variant,p.Glu215Lys,ENST00000373450,;	A	ENSG00000241635
UGT1A8	0	.	GRCh37	2	234669047	234669047	+	Intron	SNP	C	C	T	novel	.	COAD		TCGA-WS-AB45-01A-11D-A40P-10	TCGA-WS-AB45-10A-01D-A40P-10	C	C	.	.	.	.	.	.	.	.	.	.	.	.	.	.	.	c.868-6633C>T	.	.	ENST00000609767	.	91	71	19	124	124	0	UGT1A8,synonymous_variant,p.%3D,ENST00000608383,;UGT1A8,synonymous_variant,p.%3D,ENST00000360418,;UGT1A1,synonymous_variant,p.%3D,ENST00000305208,;UGT1A10,intron_variant,,ENST00000373445,;UGT1A4,intron_variant,,ENST00000373409,;UGT1A6,intron_variant,,ENST00000305139,;UGT1A3,intron_variant,,ENST00000482026,;UGT1A6,intron_variant,,ENST00000373424,;UGT1A8,intron_variant,,ENST00000608381,;UGT1A7,intr…	T	ENSG00000241635
UGT1A9	0	.	GRCh37	2	234581344	234581344	+	Missense_Mutation	SNP	C	C	T	rs368960201	.	COAD		TCGA-5M-AAT6-01A-11D-A40P-10	TCGA-5M-AAT6-10A-01D-A40P-10	C	C	.	.	.	.	.	.	.	.	.	.	.	.	.	.	.	c.764C>T	p.Thr255Met	p.T255M	ENST00000354728	1/5	131	108	23	162	161	1	UGT1A8,missense_variant,p.Thr255Met,ENST00000609637,;UGT1A9,missense_variant,p.Thr255Met,ENST00000354728,;UGT1A10,intron_variant,,ENST00000373445,;UGT1A10,intron_variant,,ENST00000344644,;UGT1A8,intron_variant,,ENST00000373450,;	T	ENSG00000241119
UGT1A9	0	.	GRCh37	2	234580653	234580653	+	Missense_Mutation	SNP	G	G	A	novel	.	COAD		TCGA-AA-3510-01A-01D-1408-10	TCGA-AA-3510-11A-01D-1408-10	G	G	.	.	.	.	.	.	.	.	.	.	.	.	.	.	.	c.73G>A	p.Ala25Thr	p.A25T	ENST00000354728	1/5	71	41	30	63	63	0	UGT1A8,missense_variant,p.Ala25Thr,ENST00000609637,;UGT1A9,missense_variant,p.Ala25Thr,ENST00000354728,;UGT1A10,intron_variant,,ENST00000373445,;UGT1A10,intron_variant,,ENST00000344644,;UGT1A8,intron_variant,,ENST00000373450,;	A	ENSG00000241119
UGT1A9	0	.	GRCh37	2	234581341	234581341	+	Missense_Mutation	SNP	G	G	A	rs375970481	.	COAD		TCGA-AA-3510-01A-01D-1408-10	TCGA-AA-3510-11A-01D-1408-10	G	G	.	.	.	.	.	.	.	.	.	.	.	.	.	.	.	c.761G>A	p.Arg254Gln	p.R254Q	ENST00000354728	1/5	130	110	20	106	106	0	UGT1A8,missense_variant,p.Arg254Gln,ENST00000609637,;UGT1A9,missense_variant,p.Arg254Gln,ENST00000354728,;UGT1A10,intron_variant,,ENST00000373445,;UGT1A10,intron_variant,,ENST00000344644,;UGT1A8,intron_variant,,ENST00000373450,;	A	ENSG00000241119
UGT1A9	0	.	GRCh37	2	234581344	234581344	+	Missense_Mutation	SNP	C	C	T	rs368960201	.	COAD		TCGA-AA-3864-01A-01D-1981-10	TCGA-AA-3864-10A-01W-0995-10	C	C	.	.	.	.	.	.	.	.	.	.	.	.	.	.	.	c.764C>T	p.Thr255Met	p.T255M	ENST00000354728	1/5	232	141	90	94	94	0	UGT1A8,missense_variant,p.Thr255Met,ENST00000609637,;UGT1A9,missense_variant,p.Thr255Met,ENST00000354728,;UGT1A10,intron_variant,,ENST00000373445,;UGT1A10,intron_variant,,ENST00000344644,;UGT1A8,intron_variant,,ENST00000373450,;	T	ENSG00000241119
UGT1A9	0	.	GRCh37	2	234581022	234581022	+	Missense_Mutation	SNP	G	G	A	rs767982435	.	COAD		TCGA-AA-3977-01A-01W-0995-10	TCGA-AA-3977-10A-01W-1982-10	G	G	.	.	.	.	.	.	.	.	.	.	.	.	.	.	.	c.442G>A	p.Asp148Asn	p.D148N	ENST00000354728	1/5	68	49	18	150	150	0	UGT1A8,missense_variant,p.Asp148Asn,ENST00000609637,;UGT1A9,missense_variant,p.Asp148Asn,ENST00000354728,;UGT1A10,intron_variant,,ENST00000373445,;UGT1A10,intron_variant,,ENST00000344644,;UGT1A8,intron_variant,,ENST00000373450,;	A	ENSG00000241119
UGT1A9	0	.	GRCh37	2	234581341	234581341	+	Missense_Mutation	SNP	G	G	A	rs375970481	.	COAD		TCGA-AA-3984-01A-02D-1981-10	TCGA-AA-3984-10A-01D-1982-10	G	G	.	.	.	.	.	.	.	.	.	.	.	.	.	.	.	c.761G>A	p.Arg254Gln	p.R254Q	ENST00000354728	1/5	220	166	54	288	288	0	UGT1A8,missense_variant,p.Arg254Gln,ENST00000609637,;UGT1A9,missense_variant,p.Arg254Gln,ENST00000354728,;UGT1A10,intron_variant,,ENST00000373445,;UGT1A10,intron_variant,,ENST00000344644,;UGT1A8,intron_variant,,ENST00000373450,;	A	ENSG00000241119
UGT1A9	0	.	GRCh37	2	234580826	234580826	+	Silent	SNP	C	C	A	novel	.	COAD		TCGA-DM-A1HB-01A-21D-A183-10	TCGA-DM-A1HB-10A-01D-A183-10	C	C	.	.	.	.	.	.	.	.	.	.	.	.	.	.	.	c.246C>A	p.%3D	p.T82T	ENST00000354728	1/5	189	179	10	194	194	0	UGT1A8,synonymous_variant,p.%3D,ENST00000609637,;UGT1A9,synonymous_variant,p.%3D,ENST00000354728,;UGT1A10,intron_variant,,ENST00000373445,;UGT1A10,intron_variant,,ENST00000344644,;UGT1A8,intron_variant,,ENST00000373450,;	A	ENSG00000241119
UGT2A1	0	.	GRCh37	4	70460396	70460396	+	Missense_Mutation	SNP	G	G	A	novel	.	COAD		TCGA-5M-AATE-01A-11D-A40P-10	TCGA-5M-AATE-10A-01D-A40P-10	G	G	.	.	.	.	.	.	.	.	.	.	.	.	.	.	.	c.1601C>T	p.Ala534Val	p.A534V	ENST00000514019	6/7	117	111	6	148	148	0	UGT2A1,missense_variant,p.Ala368Val,ENST00000286604,;UGT2A1,missense_variant,p.Ala534Val,ENST00000514019,;UGT2A1,missense_variant,p.Ala368Val,ENST00000503640,;UGT2A2,missense_variant,p.Ala334Val,ENST00000604021,;UGT2A2,missense_variant,p.Ala377Val,ENST00000457664,;UGT2A1,missense_variant,p.Ala324Val,ENST00000512704,;UGT2A2,missense_variant,p.Ala378Val,ENST00000604629,;UGT2A1,non_coding_transcript…	A	ENSG00000270386
UGT2A1	0	.	GRCh37	4	70513073	70513073	+	Frame_Shift_Del	DEL	T	T	-	.	.	COAD		TCGA-AA-3821-01A-01W-0995-10	TCGA-AA-3821-10A-01W-0995-10	T	T	.	.	.	.	.	.	.	.	.	.	.	.	.	.	.	c.290delA	p.Asn97IlefsTer18	p.N97Ifs*18	ENST00000514019	2/7	634	460	174	222	222	0	UGT2A1,frameshift_variant,p.Asn97IlefsTer18,ENST00000505512,;UGT2A1,frameshift_variant,p.Asn97IlefsTer18,ENST00000286604,;UGT2A1,frameshift_variant,p.Asn97IlefsTer18,ENST00000514019,;UGT2A1,frameshift_variant,p.Asn97IlefsTer18,ENST00000512704,;UGT2A1,frameshift_variant,p.Asn97IlefsTer18,ENST00000503640,;	-	ENSG00000270386
UGT2A1	0	.	GRCh37	4	70513438	70513438	+	Intron	SNP	G	G	A	novel	.	COAD		TCGA-AA-3852-01A-01W-0900-09	TCGA-AA-3852-10A-01W-0900-09	G	G	.	.	.	.	.	.	.	.	.	.	.	.	.	.	.	c.-54-22C>T	.	.	ENST00000514019	.	34	31	3	57	57	0	UGT2A1,5_prime_UTR_variant,,ENST00000512704,;UGT2A1,intron_variant,,ENST00000505512,;UGT2A1,intron_variant,,ENST00000286604,;UGT2A1,intron_variant,,ENST00000514019,;UGT2A1,upstream_gene_variant,,ENST00000503640,;	A	ENSG00000270386
UGT2A1	0	.	GRCh37	4	70455263	70455263	+	Missense_Mutation	SNP	C	C	T	.	.	COAD		TCGA-AA-3864-01A-01D-1981-10	TCGA-AA-3864-10A-01W-0995-10	C	C	.	.	.	.	.	.	.	.	.	.	.	.	.	.	.	c.1909G>A	p.Ala637Thr	p.A637T	ENST00000514019	7/7	285	184	100	46	46	0	UGT2A1,missense_variant,p.Ala471Thr,ENST00000286604,;UGT2A1,missense_variant,p.Ala637Thr,ENST00000514019,;UGT2A1,missense_variant,p.Ala471Thr,ENST00000503640,;UGT2A2,missense_variant,p.Ala437Thr,ENST00000604021,;UGT2A2,missense_variant,p.Ala480Thr,ENST00000457664,;UGT2A1,missense_variant,p.Ala427Thr,ENST00000512704,;UGT2A2,missense_variant,p.Ala481Thr,ENST00000604629,;UGT2A1,downstream_gene_varia…	T	ENSG00000270386
UGT2A1	0	.	GRCh37	4	70455232	70455232	+	Missense_Mutation	SNP	A	A	C	.	.	COAD		TCGA-AA-3952-01A-01W-0995-10	TCGA-AA-3952-10A-01W-0995-10	A	A	.	.	.	.	.	.	.	.	.	.	.	.	.	.	.	c.1940T>G	p.Leu647Arg	p.L647R	ENST00000514019	7/7	47	37	10	57	57	0	UGT2A1,missense_variant,p.Leu481Arg,ENST00000286604,;UGT2A1,missense_variant,p.Leu647Arg,ENST00000514019,;UGT2A1,missense_variant,p.Leu481Arg,ENST00000503640,;UGT2A2,missense_variant,p.Leu447Arg,ENST00000604021,;UGT2A2,missense_variant,p.Leu490Arg,ENST00000457664,;UGT2A1,missense_variant,p.Leu437Arg,ENST00000512704,;UGT2A2,missense_variant,p.Leu491Arg,ENST00000604629,;UGT2A1,downstream_gene_varia…	C	ENSG00000270386
UGT2A1	0	.	GRCh37	4	70455340	70455340	+	Missense_Mutation	SNP	C	C	A	.	.	COAD		TCGA-AA-3977-01A-01W-0995-10	TCGA-AA-3977-10A-01W-1982-10	C	C	.	.	.	.	.	.	.	.	.	.	.	.	.	.	.	c.1832G>T	p.Arg611Ile	p.R611I	ENST00000514019	7/7	23	16	7	181	181	0	UGT2A1,missense_variant,p.Arg445Ile,ENST00000286604,;UGT2A1,missense_variant,p.Arg611Ile,ENST00000514019,;UGT2A1,missense_variant,p.Arg445Ile,ENST00000503640,;UGT2A2,missense_variant,p.Arg411Ile,ENST00000604021,;UGT2A2,missense_variant,p.Arg454Ile,ENST00000457664,;UGT2A1,missense_variant,p.Arg401Ile,ENST00000512704,;UGT2A2,missense_variant,p.Arg455Ile,ENST00000604629,;UGT2A1,non_coding_transcript…	A	ENSG00000270386
UGT2A1	0	.	GRCh37	4	70512759	70512759	+	Missense_Mutation	SNP	C	C	T	rs192398239	.	COAD		TCGA-AA-A00N-01A-02D-A17O-10	TCGA-AA-A00N-10A-01D-A17O-10	C	C	.	.	.	.	.	.	.	.	.	.	.	.	.	.	.	c.604G>A	p.Asp202Asn	p.D202N	ENST00000514019	2/7	44	32	11	10	10	0	UGT2A1,missense_variant,p.Asp202Asn,ENST00000286604,;UGT2A1,missense_variant,p.Asp202Asn,ENST00000514019,;UGT2A1,missense_variant,p.Asp202Asn,ENST00000512704,;UGT2A1,missense_variant,p.Asp202Asn,ENST00000503640,;UGT2A1,downstream_gene_variant,,ENST00000505512,;	T	ENSG00000270386
UGT2A1	0	.	GRCh37	4	70512815	70512815	+	Missense_Mutation	SNP	C	C	T	.	.	COAD		TCGA-AA-A01R-01A-21D-A17O-10	TCGA-AA-A01R-11A-12D-A17O-10	C	C	.	.	.	.	.	.	.	.	.	.	.	.	.	.	.	c.548G>A	p.Cys183Tyr	p.C183Y	ENST00000514019	2/7	67	39	27	75	75	0	UGT2A1,missense_variant,p.Cys183Tyr,ENST00000286604,;UGT2A1,missense_variant,p.Cys183Tyr,ENST00000514019,;UGT2A1,missense_variant,p.Cys183Tyr,ENST00000512704,;UGT2A1,missense_variant,p.Cys183Tyr,ENST00000503640,;UGT2A1,downstream_gene_variant,,ENST00000505512,;	T	ENSG00000270386
UGT2A1	0	.	GRCh37	4	70455069	70455069	+	3'UTR	SNP	A	A	G	novel	.	COAD		TCGA-AA-A022-01A-21D-A17O-10	TCGA-AA-A022-11A-11D-A17O-10	A	A	.	.	.	.	.	.	.	.	.	.	.	.	.	.	.	c.*21T>C	.	.	ENST00000514019	7/7	36	32	4	30	30	0	UGT2A1,3_prime_UTR_variant,,ENST00000514019,;UGT2A1,3_prime_UTR_variant,,ENST00000503640,;UGT2A2,3_prime_UTR_variant,,ENST00000604021,;UGT2A2,3_prime_UTR_variant,,ENST00000457664,;UGT2A1,3_prime_UTR_variant,,ENST00000512704,;UGT2A2,3_prime_UTR_variant,,ENST00000604629,;UGT2A1,downstream_gene_variant,,ENST00000286604,;UGT2A1,downstream_gene_variant,,ENST00000502343,;RP11-401E5.2,upstream_gene_vari…	G	ENSG00000270386
UGT2A1	0	.	GRCh37	4	70513073	70513073	+	Frame_Shift_Del	DEL	T	T	-	.	.	COAD		TCGA-AA-A022-01A-21D-A17O-10	TCGA-AA-A022-11A-11D-A17O-10	T	T	.	.	.	.	.	.	.	.	.	.	.	.	.	.	.	c.290delA	p.Asn97IlefsTer18	p.N97Ifs*18	ENST00000514019	2/7	144	111	33	113	113	0	UGT2A1,frameshift_variant,p.Asn97IlefsTer18,ENST00000505512,;UGT2A1,frameshift_variant,p.Asn97IlefsTer18,ENST00000286604,;UGT2A1,frameshift_variant,p.Asn97IlefsTer18,ENST00000514019,;UGT2A1,frameshift_variant,p.Asn97IlefsTer18,ENST00000512704,;UGT2A1,frameshift_variant,p.Asn97IlefsTer18,ENST00000503640,;	-	ENSG00000270386
UGT2A1	0	.	GRCh37	4	70460365	70460365	+	Silent	SNP	G	G	T	novel	.	COAD		TCGA-AD-A5EJ-01A-11D-A28G-10	TCGA-AD-A5EJ-10A-01D-A28G-10	G	G	.	.	.	.	.	.	.	.	.	.	.	.	.	.	.	c.1632C>A	p.%3D	p.I544I	ENST00000514019	6/7	225	205	20	236	236	0	UGT2A1,synonymous_variant,p.%3D,ENST00000286604,;UGT2A1,synonymous_variant,p.%3D,ENST00000514019,;UGT2A1,synonymous_variant,p.%3D,ENST00000503640,;UGT2A2,synonymous_variant,p.%3D,ENST00000604021,;UGT2A2,synonymous_variant,p.%3D,ENST00000457664,;UGT2A1,synonymous_variant,p.%3D,ENST00000512704,;UGT2A2,synonymous_variant,p.%3D,ENST00000604629,;UGT2A1,non_coding_transcript_exon_variant,,ENST000005023…	T	ENSG00000270386
UGT2A1	0	.	GRCh37	4	70455274	70455274	+	Missense_Mutation	SNP	C	C	T	rs150861593	.	COAD		TCGA-AZ-4615-01A-01D-1408-10	TCGA-AZ-4615-10A-01D-1408-10	C	C	.	.	.	.	.	.	.	.	.	.	.	.	.	.	.	c.1898G>A	p.Arg633His	p.R633H	ENST00000514019	7/7	99	70	28	62	62	0	UGT2A1,missense_variant,p.Arg467His,ENST00000286604,;UGT2A1,missense_variant,p.Arg633His,ENST00000514019,;UGT2A1,missense_variant,p.Arg467His,ENST00000503640,;UGT2A2,missense_variant,p.Arg433His,ENST00000604021,;UGT2A2,missense_variant,p.Arg476His,ENST00000457664,;UGT2A1,missense_variant,p.Arg423His,ENST00000512704,;UGT2A2,missense_variant,p.Arg477His,ENST00000604629,;UGT2A1,downstream_gene_varia…	T	ENSG00000270386
UGT2A1	0	.	GRCh37	4	70455045	70455045	+	3'UTR	SNP	A	A	G	novel	.	COAD		TCGA-D5-6538-01A-11D-1719-10	TCGA-D5-6538-10A-01D-1719-10	A	A	.	.	.	.	.	.	.	.	.	.	.	.	.	.	.	c.*45T>C	.	.	ENST00000514019	7/7	13	7	6	25	25	0	UGT2A1,3_prime_UTR_variant,,ENST00000514019,;UGT2A1,3_prime_UTR_variant,,ENST00000503640,;UGT2A2,3_prime_UTR_variant,,ENST00000604021,;UGT2A2,3_prime_UTR_variant,,ENST00000457664,;UGT2A1,3_prime_UTR_variant,,ENST00000512704,;UGT2A2,3_prime_UTR_variant,,ENST00000604629,;UGT2A1,downstream_gene_variant,,ENST00000286604,;UGT2A1,downstream_gene_variant,,ENST00000502343,;RP11-401E5.2,upstream_gene_vari…	G	ENSG00000270386
UGT2A1	0	.	GRCh37	4	70455098	70455098	+	Frame_Shift_Del	DEL	T	T	-	.	.	COAD		TCGA-F4-6570-01A-11D-1771-10	TCGA-F4-6570-10A-01D-1771-10	T	T	.	.	.	.	.	.	.	.	.	.	.	.	.	.	.	c.2074delA	p.Arg692GlufsTer57	p.R692Efs*57	ENST00000514019	7/7	63	47	16	58	58	0	UGT2A1,frameshift_variant,p.Arg526GlufsTer?,ENST00000286604,;UGT2A1,frameshift_variant,p.Arg692GlufsTer57,ENST00000514019,;UGT2A1,frameshift_variant,p.Arg526GlufsTer57,ENST00000503640,;UGT2A2,frameshift_variant,p.Arg492GlufsTer?,ENST00000604021,;UGT2A2,frameshift_variant,p.Arg535GlufsTer57,ENST00000457664,;UGT2A1,frameshift_variant,p.Arg482GlufsTer57,ENST00000512704,;UGT2A2,frameshift_variant,p.A…	-	ENSG00000270386
UGT2A2	0	.	GRCh37	4	70505291	70505291	+	Missense_Mutation	SNP	A	A	G	novel	.	COAD		TCGA-F4-6570-01A-11D-1771-10	TCGA-F4-6570-10A-01D-1771-10	A	A	.	.	.	.	.	.	.	.	.	.	.	.	.	.	.	c.68T>C	p.Leu23Pro	p.L23P	ENST00000457664	1/6	85	61	24	188	187	1	UGT2A2,missense_variant,p.Leu24Pro,ENST00000604021,;UGT2A2,missense_variant,p.Leu23Pro,ENST00000457664,;UGT2A2,missense_variant,p.Leu24Pro,ENST00000604629,;UGT2A1,intron_variant,,ENST00000286604,;UGT2A1,intron_variant,,ENST00000514019,;UGT2A1,intron_variant,,ENST00000512704,;UGT2A1,intron_variant,,ENST00000503640,;	G	ENSG00000271271
UGT2A2	0	.	GRCh37	4	70505242	70505242	+	Silent	SNP	A	A	G	.	.	COAD		TCGA-G4-6302-01A-11D-1719-10	TCGA-G4-6302-10A-01D-1719-10	A	A	.	.	.	.	.	.	.	.	.	.	.	.	.	.	.	c.117T>C	p.%3D	p.G39G	ENST00000457664	1/6	333	294	39	84	84	0	UGT2A2,synonymous_variant,p.%3D,ENST00000604021,;UGT2A2,synonymous_variant,p.%3D,ENST00000457664,;UGT2A1,synonymous_variant,p.%3D,ENST00000514019,;UGT2A2,synonymous_variant,p.%3D,ENST00000604629,;UGT2A1,intron_variant,,ENST00000286604,;UGT2A1,intron_variant,,ENST00000512704,;UGT2A1,intron_variant,,ENST00000503640,;	G	ENSG00000271271
UGT2A3	0	.	GRCh37	4	69796308	69796308	+	Silent	SNP	G	G	A	rs767210111	.	COAD		TCGA-5M-AAT6-01A-11D-A40P-10	TCGA-5M-AAT6-10A-01D-A40P-10	G	G	.	.	.	.	.	.	.	.	.	.	.	.	.	.	.	c.1260C>T	p.%3D	p.S420S	ENST00000251566	5/6	47	40	7	76	76	0	UGT2A3,synonymous_variant,p.%3D,ENST00000251566,;UGT2A3,synonymous_variant,p.%3D,ENST00000420231,;UGT2A3,3_prime_UTR_variant,,ENST00000503012,;	A	ENSG00000135220
UGT2A3	0	.	GRCh37	4	69796931	69796932	+	Frame_Shift_Ins	INS	-	-	G	rs755213063	.	COAD		TCGA-A6-5665-01A-01D-1650-10	TCGA-A6-5665-10A-01D-1650-10	-	-	.	.	.	.	.	.	.	.	.	.	.	.	.	.	.	c.1025dupC	p.Ser343IlefsTer11	p.S343Ifs*11	ENST00000251566	4/6	300	264	36	651	651	0	UGT2A3,frameshift_variant,p.Ser343IlefsTer11,ENST00000251566,;UGT2A3,frameshift_variant,p.Ser54IlefsTer11,ENST00000420231,;UGT2A3,3_prime_UTR_variant,,ENST00000503012,;	G	ENSG00000135220
UGT2A3	0	.	GRCh37	4	69795692	69795692	+	Nonsense_Mutation	SNP	G	G	A	rs764336156	.	COAD		TCGA-AA-3715-01A-01W-0900-09	TCGA-AA-3715-10A-01W-0900-09	G	G	.	.	.	.	.	.	.	.	.	.	.	.	.	.	.	c.1423C>T	p.Arg475Ter	p.R475*	ENST00000251566	6/6	151	137	14	159	159	0	UGT2A3,stop_gained,p.Arg475Ter,ENST00000251566,;UGT2A3,stop_gained,p.Arg186Ter,ENST00000420231,;UGT2A3,3_prime_UTR_variant,,ENST00000503012,;	A	ENSG00000135220
UGT2A3	0	.	GRCh37	4	69796285	69796285	+	Missense_Mutation	SNP	C	C	G	.	.	COAD		TCGA-AA-3971-01A-01W-0995-10	TCGA-AA-3971-10A-01W-0999-10	C	C	.	.	.	.	.	.	.	.	.	.	.	.	.	.	.	c.1283G>C	p.Arg428Thr	p.R428T	ENST00000251566	5/6	301	220	80	902	901	0	UGT2A3,missense_variant,p.Arg428Thr,ENST00000251566,;UGT2A3,missense_variant,p.Arg139Thr,ENST00000420231,;UGT2A3,3_prime_UTR_variant,,ENST00000503012,;	G	ENSG00000135220
UGT2A3	0	.	GRCh37	4	69811043	69811043	+	Missense_Mutation	SNP	G	G	T	.	.	COAD		TCGA-AA-3977-01A-01W-0995-10	TCGA-AA-3977-10A-01W-1982-10	G	G	.	.	.	.	.	.	.	.	.	.	.	.	.	.	.	c.845C>A	p.Pro282His	p.P282H	ENST00000251566	2/6	94	48	45	156	156	0	UGT2A3,missense_variant,p.Pro282His,ENST00000251566,;UGT2A3,5_prime_UTR_variant,,ENST00000420231,;UGT2A3,missense_variant,p.Pro148His,ENST00000503012,;	T	ENSG00000135220
UGT2A3	0	.	GRCh37	4	69817414	69817414	+	Missense_Mutation	SNP	A	A	C	.	.	COAD		TCGA-AA-3977-01A-01W-0995-10	TCGA-AA-3977-10A-01W-1982-10	A	A	.	.	.	.	.	.	.	.	.	.	.	.	.	.	.	c.65T>G	p.Phe22Cys	p.F22C	ENST00000251566	1/6	12	8	4	64	64	0	UGT2A3,missense_variant,p.Phe22Cys,ENST00000251566,;UGT2A3,upstream_gene_variant,,ENST00000420231,;UGT2A3,upstream_gene_variant,,ENST00000503012,;	C	ENSG00000135220
UGT2A3	0	.	GRCh37	4	69817282	69817282	+	Missense_Mutation	SNP	T	T	C	.	.	COAD		TCGA-AD-6964-01A-11D-1924-10	TCGA-AD-6964-10A-01D-1924-10	T	T	.	.	.	.	.	.	.	.	.	.	.	.	.	.	.	c.197A>G	p.Tyr66Cys	p.Y66C	ENST00000251566	1/6	68	61	7	75	75	0	UGT2A3,missense_variant,p.Tyr66Cys,ENST00000251566,;UGT2A3,upstream_gene_variant,,ENST00000420231,;UGT2A3,upstream_gene_variant,,ENST00000503012,;	C	ENSG00000135220
UGT2A3	0	.	GRCh37	4	69816803	69816803	+	Missense_Mutation	SNP	C	C	T	rs372791849	.	COAD		TCGA-D5-6928-01A-11D-1924-10	TCGA-D5-6928-10A-01D-1924-10	C	C	.	.	.	.	.	.	.	.	.	.	.	.	.	.	.	c.676G>A	p.Asp226Asn	p.D226N	ENST00000251566	1/6	94	79	15	165	165	0	UGT2A3,missense_variant,p.Asp226Asn,ENST00000251566,;UGT2A3,5_prime_UTR_variant,,ENST00000420231,;UGT2A3,missense_variant,p.Asp92Asn,ENST00000503012,;	T	ENSG00000135220
UGT2A3	0	.	GRCh37	4	69817137	69817137	+	Frame_Shift_Del	DEL	A	A	-	.	.	COAD		TCGA-D5-6928-01A-11D-1924-10	TCGA-D5-6928-10A-01D-1924-10	A	A	.	.	.	.	.	.	.	.	.	.	.	.	.	.	.	c.342delT	p.Phe114LeufsTer4	p.F114Lfs*4	ENST00000251566	1/6	101	87	14	122	122	0	UGT2A3,frameshift_variant,p.Phe114LeufsTer4,ENST00000251566,;UGT2A3,upstream_gene_variant,,ENST00000420231,;UGT2A3,upstream_gene_variant,,ENST00000503012,;	-	ENSG00000135220
UGT2A3	0	.	GRCh37	4	69816941	69816941	+	Nonsense_Mutation	SNP	G	G	A	rs570452785	.	COAD		TCGA-D5-6930-01A-11D-1924-10	TCGA-D5-6930-10A-01D-1924-10	G	G	.	.	.	.	.	.	.	.	.	.	.	.	.	.	.	c.538C>T	p.Arg180Ter	p.R180*	ENST00000251566	1/6	143	106	37	121	121	0	UGT2A3,stop_gained,p.Arg180Ter,ENST00000251566,;UGT2A3,5_prime_UTR_variant,,ENST00000420231,;UGT2A3,stop_gained,p.Arg46Ter,ENST00000503012,;	A	ENSG00000135220
UGT2A3	0	.	GRCh37	4	69817371	69817371	+	Missense_Mutation	SNP	C	C	G	.	.	COAD		TCGA-DM-A28K-01A-21D-A16V-10	TCGA-DM-A28K-10A-01D-A16V-10	C	C	.	.	.	.	.	.	.	.	.	.	.	.	.	.	.	c.108G>C	p.Trp36Cys	p.W36C	ENST00000251566	1/6	27	14	13	36	36	0	UGT2A3,missense_variant,p.Trp36Cys,ENST00000251566,;UGT2A3,upstream_gene_variant,,ENST00000420231,;UGT2A3,upstream_gene_variant,,ENST00000503012,;	G	ENSG00000135220
UGT2B10	0	.	GRCh37	4	69696412	69696412	+	Missense_Mutation	SNP	C	C	T	.	.	COAD		TCGA-A6-6781-01A-22D-A270-10	TCGA-A6-6781-10A-01D-A270-10	C	C	.	.	.	.	.	.	.	.	.	.	.	.	.	.	.	c.1402C>T	p.Arg468Cys	p.R468C	ENST00000265403	6/6	146	111	35	133	133	0	UGT2B10,missense_variant,p.Arg468Cys,ENST00000265403,;UGT2B10,missense_variant,p.Arg384Cys,ENST00000458688,;RP11-468N14.3,downstream_gene_variant,,ENST00000512503,;	T	ENSG00000109181
UGT2B10	0	.	GRCh37	4	69693142	69693142	+	Frame_Shift_Del	DEL	T	T	-	rs201232361	.	COAD		TCGA-AA-3663-01A-01D-1719-10	TCGA-AA-3663-11A-01D-1719-10	T	T	.	.	.	.	.	.	.	.	.	.	.	.	.	.	.	c.1188delT	p.Phe396LeufsTer10	p.F396Lfs*10	ENST00000265403	5/6	692	636	56	342	342	0	UGT2B10,frameshift_variant,p.Phe396LeufsTer10,ENST00000265403,;UGT2B10,frameshift_variant,p.Phe312LeufsTer10,ENST00000458688,;	-	ENSG00000109181
UGT2B10	0	.	GRCh37	4	69696698	69696698	+	3'UTR	DEL	A	A	-	rs74464983	.	COAD		TCGA-AA-3821-01A-01W-0995-10	TCGA-AA-3821-10A-01W-0995-10	A	A	.	.	.	.	.	.	.	.	.	.	.	.	.	.	.	c.*109delA	.	.	ENST00000265403	6/6	82	54	27	44	44	0	UGT2B10,3_prime_UTR_variant,,ENST00000265403,;UGT2B10,downstream_gene_variant,,ENST00000458688,;RP11-468N14.3,downstream_gene_variant,,ENST00000512503,;	-	ENSG00000109181
UGT2B10	0	.	GRCh37	4	69696717	69696717	+	3'UTR	SNP	G	G	A	novel	.	COAD		TCGA-AA-A017-01A-01W-A00E-09	TCGA-AA-A017-10A-01W-A00E-09	G	G	.	.	.	.	.	.	.	.	.	.	.	.	.	.	.	c.*120G>A	.	.	ENST00000265403	6/6	192	142	50	134	134	0	UGT2B10,3_prime_UTR_variant,,ENST00000265403,;UGT2B10,downstream_gene_variant,,ENST00000458688,;RP11-468N14.3,downstream_gene_variant,,ENST00000512503,;	A	ENSG00000109181
UGT2B10	0	.	GRCh37	4	69696450	69696450	+	Missense_Mutation	SNP	C	C	A	rs534255693	.	COAD		TCGA-AA-A02E-01A-01W-A00E-09	TCGA-AA-A02E-10A-01W-A00E-09	C	C	.	.	.	.	.	.	.	.	.	.	.	.	.	.	.	c.1440C>A	p.His480Gln	p.H480Q	ENST00000265403	6/6	908	689	218	350	350	0	UGT2B10,missense_variant,p.His480Gln,ENST00000265403,;UGT2B10,missense_variant,p.His396Gln,ENST00000458688,;RP11-468N14.3,downstream_gene_variant,,ENST00000512503,;	A	ENSG00000109181
UGT2B10	0	.	GRCh37	4	69683801	69683801	+	Missense_Mutation	SNP	G	G	C	rs201500332	.	COAD		TCGA-AA-A02O-01A-21W-A096-10	TCGA-AA-A02O-11A-11W-A096-10	G	G	.	.	.	.	.	.	.	.	.	.	.	.	.	.	.	c.773G>C	p.Arg258Pro	p.R258P	ENST00000265403	2/6	359	335	23	169	169	0	UGT2B10,missense_variant,p.Arg258Pro,ENST00000265403,;UGT2B10,missense_variant,p.Arg174Pro,ENST00000458688,;RP11-468N14.1,downstream_gene_variant,,ENST00000507455,;	C	ENSG00000109181
UGT2B10	0	.	GRCh37	4	69696347	69696347	+	Missense_Mutation	SNP	G	G	A	rs748758295	.	COAD		TCGA-AZ-4615-01A-01D-1408-10	TCGA-AZ-4615-10A-01D-1408-10	G	G	.	.	.	.	.	.	.	.	.	.	.	.	.	.	.	c.1337G>A	p.Arg446Lys	p.R446K	ENST00000265403	6/6	136	79	56	87	87	0	UGT2B10,missense_variant,p.Arg446Lys,ENST00000265403,;UGT2B10,missense_variant,p.Arg362Lys,ENST00000458688,;RP11-468N14.3,downstream_gene_variant,,ENST00000512503,;	A	ENSG00000109181
UGT2B10	0	.	GRCh37	4	69683822	69683822	+	Missense_Mutation	SNP	T	T	G	.	.	COAD		TCGA-CA-6718-01A-11D-1835-10	TCGA-CA-6718-10A-01D-1835-10	T	T	.	.	.	.	.	.	.	.	.	.	.	.	.	.	.	c.794T>G	p.Phe265Cys	p.F265C	ENST00000265403	2/6	155	110	44	159	159	0	UGT2B10,missense_variant,p.Phe265Cys,ENST00000265403,;UGT2B10,missense_variant,p.Phe181Cys,ENST00000458688,;RP11-468N14.1,downstream_gene_variant,,ENST00000507455,;	G	ENSG00000109181
UGT2B10	0	.	GRCh37	4	69696579	69696579	+	Missense_Mutation	SNP	G	G	T	novel	.	COAD		TCGA-CA-6718-01A-11D-1835-10	TCGA-CA-6718-10A-01D-1835-10	G	G	.	.	.	.	.	.	.	.	.	.	.	.	.	.	.	c.1569G>T	p.Lys523Asn	p.K523N	ENST00000265403	6/6	109	82	27	180	179	0	UGT2B10,missense_variant,p.Lys523Asn,ENST00000265403,;UGT2B10,missense_variant,p.Lys439Asn,ENST00000458688,;RP11-468N14.3,downstream_gene_variant,,ENST00000512503,;	T	ENSG00000109181
UGT2B10	0	.	GRCh37	4	69693265	69693265	+	Missense_Mutation	SNP	T	T	C	novel	.	COAD		TCGA-CM-6168-01A-11D-1650-10	TCGA-CM-6168-10A-01D-1650-10	T	T	.	.	.	.	.	.	.	.	.	.	.	.	.	.	.	c.1306T>C	p.Ser436Pro	p.S436P	ENST00000265403	5/6	843	683	160	479	477	1	UGT2B10,missense_variant,p.Ser436Pro,ENST00000265403,;UGT2B10,missense_variant,p.Ser352Pro,ENST00000458688,;	C	ENSG00000109181
UGT2B10	0	.	GRCh37	4	69693053	69693054	+	Frame_Shift_Ins	INS	-	-	A	novel	.	COAD		TCGA-D5-6530-01A-11D-1719-10	TCGA-D5-6530-10A-01D-1719-10	-	-	.	.	.	.	.	.	.	.	.	.	.	.	.	.	.	c.1099dupA	p.Thr367AsnfsTer15	p.T367Nfs*15	ENST00000265403	5/6	545	417	128	95	95	0	UGT2B10,frameshift_variant,p.Thr367AsnfsTer15,ENST00000265403,;UGT2B10,frameshift_variant,p.Thr283AsnfsTer15,ENST00000458688,;	A	ENSG00000109181
UGT2B11	0	.	GRCh37	4	70078422	70078422	+	Missense_Mutation	SNP	A	A	T	rs200383787	.	COAD		TCGA-5M-AATE-01A-11D-A40P-10	TCGA-5M-AATE-10A-01D-A40P-10	A	A	.	.	.	.	.	.	.	.	.	.	.	.	.	.	.	c.739T>A	p.Phe247Ile	p.F247I	ENST00000446444	2/6	91	52	38	129	127	1	UGT2B11,missense_variant,p.Phe247Ile,ENST00000446444,;RP11-704M14.1,intron_variant,,ENST00000504301,;RP11-704M14.1,intron_variant,,ENST00000505646,;RP11-704M14.2,downstream_gene_variant,,ENST00000514003,;	T	ENSG00000213759
UGT2B11	0	.	GRCh37	4	70066059	70066059	+	3'UTR	SNP	G	G	T	novel	.	COAD		TCGA-A6-6653-01A-11D-1771-10	TCGA-A6-6653-10A-01D-1771-10	G	G	.	.	.	.	.	.	.	.	.	.	.	.	.	.	.	c.*99C>A	.	.	ENST00000446444	6/6	51	29	21	36	36	0	UGT2B11,3_prime_UTR_variant,,ENST00000446444,;RP11-704M14.1,intron_variant,,ENST00000504301,;RP11-704M14.1,upstream_gene_variant,,ENST00000505646,;UGT2B11,downstream_gene_variant,,ENST00000513315,;	T	ENSG00000213759
UGT2B11	0	.	GRCh37	4	70079999	70079999	+	Missense_Mutation	SNP	C	C	T	rs367971286	.	COAD		TCGA-A6-6653-01A-11D-1771-10	TCGA-A6-6653-10A-01D-1771-10	C	C	.	.	.	.	.	.	.	.	.	.	.	.	.	.	.	c.442G>A	p.Val148Ile	p.V148I	ENST00000446444	1/6	354	216	138	245	244	1	UGT2B11,missense_variant,p.Val148Ile,ENST00000446444,;RP11-704M14.1,intron_variant,,ENST00000504301,;RP11-704M14.1,intron_variant,,ENST00000505646,;RP11-704M14.2,downstream_gene_variant,,ENST00000514003,;	T	ENSG00000213759
UGT2B11	0	.	GRCh37	4	70079940	70079940	+	Silent	SNP	C	C	T	rs772520065	.	COAD		TCGA-AA-3864-01A-01D-1981-10	TCGA-AA-3864-10A-01W-0995-10	C	C	.	.	.	.	.	.	.	.	.	.	.	.	.	.	.	c.501G>A	p.%3D	p.R167R	ENST00000446444	1/6	515	303	212	90	90	0	UGT2B11,synonymous_variant,p.%3D,ENST00000446444,;RP11-704M14.1,intron_variant,,ENST00000504301,;RP11-704M14.1,intron_variant,,ENST00000505646,;RP11-704M14.2,downstream_gene_variant,,ENST00000514003,;	T	ENSG00000213759
UGT2B11	0	.	GRCh37	4	70078408	70078408	+	Silent	SNP	T	T	C	rs546752504	.	COAD		TCGA-AA-3877-01A-01W-0995-10	TCGA-AA-3877-10A-01W-1982-10	T	T	.	.	.	.	.	.	.	.	.	.	.	.	.	.	.	c.753A>G	p.%3D	p.G251G	ENST00000446444	2/6	219	171	47	425	423	1	UGT2B11,synonymous_variant,p.%3D,ENST00000446444,;RP11-704M14.1,intron_variant,,ENST00000504301,;RP11-704M14.1,intron_variant,,ENST00000505646,;RP11-704M14.2,downstream_gene_variant,,ENST00000514003,;	C	ENSG00000213759
UGT2B11	0	.	GRCh37	4	70080479	70080479	+	5'Flank	SNP	C	C	A	novel	.	COAD		TCGA-AA-3984-01A-02D-1981-10	TCGA-AA-3984-10A-01D-1982-10	C	C	.	.	.	.	.	.	.	.	.	.	.	.	.	.	.	.	.	.	ENST00000446444	.	136	100	36	166	166	0	UGT2B11,upstream_gene_variant,,ENST00000446444,;RP11-704M14.1,non_coding_transcript_exon_variant,,ENST00000505646,;RP11-704M14.1,downstream_gene_variant,,ENST00000504301,;RP11-704M14.2,downstream_gene_variant,,ENST00000514003,;	A	ENSG00000213759
UGT2B11	0	.	GRCh37	4	70066279	70066279	+	Missense_Mutation	SNP	G	G	T	.	.	COAD		TCGA-AA-A00N-01A-02D-A17O-10	TCGA-AA-A00N-10A-01D-A17O-10	G	G	.	.	.	.	.	.	.	.	.	.	.	.	.	.	.	c.1469C>A	p.Ser490Tyr	p.S490Y	ENST00000446444	6/6	129	96	33	51	51	0	UGT2B11,missense_variant,p.Ser490Tyr,ENST00000446444,;RP11-704M14.1,non_coding_transcript_exon_variant,,ENST00000504301,;RP11-704M14.1,non_coding_transcript_exon_variant,,ENST00000505646,;UGT2B11,downstream_gene_variant,,ENST00000513315,;	T	ENSG00000213759
UGT2B11	0	.	GRCh37	4	70080140	70080140	+	Nonsense_Mutation	SNP	G	G	A	rs776369680	.	COAD		TCGA-AA-A00N-01A-02D-A17O-10	TCGA-AA-A00N-10A-01D-A17O-10	G	G	.	.	.	.	.	.	.	.	.	.	.	.	.	.	.	c.301C>T	p.Arg101Ter	p.R101*	ENST00000446444	1/6	294	236	57	67	67	0	UGT2B11,stop_gained,p.Arg101Ter,ENST00000446444,;RP11-704M14.1,intron_variant,,ENST00000504301,;RP11-704M14.1,intron_variant,,ENST00000505646,;RP11-704M14.2,downstream_gene_variant,,ENST00000514003,;	A	ENSG00000213759
UGT2B11	0	.	GRCh37	4	70079942	70079942	+	Silent	SNP	G	G	T	rs148268917	.	COAD		TCGA-AA-A02W-01A-01W-A00E-09	TCGA-AA-A02W-10A-01W-A00E-09	G	G	.	.	.	.	.	.	.	.	.	.	.	.	.	.	.	c.499C>A	p.%3D	p.R167R	ENST00000446444	1/6	232	160	72	340	340	0	UGT2B11,synonymous_variant,p.%3D,ENST00000446444,;RP11-704M14.1,intron_variant,,ENST00000504301,;RP11-704M14.1,intron_variant,,ENST00000505646,;RP11-704M14.2,downstream_gene_variant,,ENST00000514003,;	T	ENSG00000213759
UGT2B11	0	.	GRCh37	4	70066338	70066338	+	Silent	SNP	G	G	A	rs746788514	.	COAD		TCGA-AD-5900-01A-11D-1650-10	TCGA-AD-5900-10A-01D-1650-10	G	G	.	.	.	.	.	.	.	.	.	.	.	.	.	.	.	c.1410C>T	p.%3D	p.H470H	ENST00000446444	6/6	341	259	81	380	379	1	UGT2B11,synonymous_variant,p.%3D,ENST00000446444,;RP11-704M14.1,intron_variant,,ENST00000504301,;RP11-704M14.1,intron_variant,,ENST00000505646,;UGT2B11,downstream_gene_variant,,ENST00000513315,;	A	ENSG00000213759
UGT2B11	0	.	GRCh37	4	70079959	70079959	+	Missense_Mutation	SNP	G	G	A	novel	.	COAD		TCGA-AD-A5EJ-01A-11D-A28G-10	TCGA-AD-A5EJ-10A-01D-A28G-10	G	G	.	.	.	.	.	.	.	.	.	.	.	.	.	.	.	c.482C>T	p.Ala161Val	p.A161V	ENST00000446444	1/6	385	243	142	410	408	2	UGT2B11,missense_variant,p.Ala161Val,ENST00000446444,;RP11-704M14.1,intron_variant,,ENST00000504301,;RP11-704M14.1,intron_variant,,ENST00000505646,;RP11-704M14.2,downstream_gene_variant,,ENST00000514003,;	A	ENSG00000213759
UGT2B11	0	.	GRCh37	4	70079884	70079884	+	Missense_Mutation	SNP	C	C	A	rs200374868	.	COAD		TCGA-AZ-4614-01A-01D-1408-10	TCGA-AZ-4614-10A-01D-2188-10	C	C	.	.	.	.	.	.	.	.	.	.	.	.	.	.	.	c.557G>T	p.Gly186Val	p.G186V	ENST00000446444	1/6	36	14	22	242	242	0	UGT2B11,missense_variant,p.Gly186Val,ENST00000446444,;RP11-704M14.1,intron_variant,,ENST00000504301,;RP11-704M14.1,intron_variant,,ENST00000505646,;RP11-704M14.2,downstream_gene_variant,,ENST00000514003,;	A	ENSG00000213759
UGT2B11	0	.	GRCh37	4	70079803	70079803	+	Frame_Shift_Del	DEL	T	T	-	novel	.	COAD		TCGA-AZ-4615-01A-01D-1408-10	TCGA-AZ-4615-10A-01D-1408-10	T	T	.	.	.	.	.	.	.	.	.	.	.	.	.	.	.	c.638delA	p.Asn213IlefsTer2	p.N213Ifs*2	ENST00000446444	1/6	132	93	39	48	48	0	UGT2B11,frameshift_variant,p.Asn213IlefsTer2,ENST00000446444,;RP11-704M14.1,intron_variant,,ENST00000504301,;RP11-704M14.1,intron_variant,,ENST00000505646,;RP11-704M14.2,downstream_gene_variant,,ENST00000514003,;	-	ENSG00000213759
UGT2B11	0	.	GRCh37	4	70079918	70079918	+	Frame_Shift_Del	DEL	T	T	-	.	.	COAD		TCGA-CM-6675-01A-11D-1835-10	TCGA-CM-6675-10A-01D-1835-10	T	T	.	.	.	.	.	.	.	.	.	.	.	.	.	.	.	c.523delA	p.Thr175LeufsTer13	p.T175Lfs*13	ENST00000446444	1/6	305	222	83	385	385	0	UGT2B11,frameshift_variant,p.Thr175LeufsTer13,ENST00000446444,;RP11-704M14.1,intron_variant,,ENST00000504301,;RP11-704M14.1,intron_variant,,ENST00000505646,;RP11-704M14.2,downstream_gene_variant,,ENST00000514003,;	-	ENSG00000213759
UGT2B11	0	.	GRCh37	4	70066181	70066181	+	Missense_Mutation	SNP	C	C	A	novel	.	COAD		TCGA-D5-6540-01A-11D-1719-10	TCGA-D5-6540-10A-01D-1719-10	C	C	.	.	.	.	.	.	.	.	.	.	.	.	.	.	.	c.1567G>T	p.Gly523Trp	p.G523W	ENST00000446444	6/6	221	174	46	161	160	1	UGT2B11,missense_variant,p.Gly523Trp,ENST00000446444,;RP11-704M14.1,non_coding_transcript_exon_variant,,ENST00000505646,;RP11-704M14.1,intron_variant,,ENST00000504301,;UGT2B11,downstream_gene_variant,,ENST00000513315,;	A	ENSG00000213759
UGT2B11	0	.	GRCh37	4	70079848	70079848	+	Missense_Mutation	SNP	A	A	G	.	.	COAD		TCGA-G4-6626-01A-11D-1771-10	TCGA-G4-6626-10A-01D-1771-10	A	A	.	.	.	.	.	.	.	.	.	.	.	.	.	.	.	c.593T>C	p.Met198Thr	p.M198T	ENST00000446444	1/6	43	34	8	224	224	0	UGT2B11,missense_variant,p.Met198Thr,ENST00000446444,;RP11-704M14.1,intron_variant,,ENST00000504301,;RP11-704M14.1,intron_variant,,ENST00000505646,;RP11-704M14.2,downstream_gene_variant,,ENST00000514003,;	G	ENSG00000213759
UGT2B15	0	.	GRCh37	4	69535921	69535921	+	Missense_Mutation	SNP	A	A	G	novel	.	COAD		TCGA-A6-2686-01A-01D-1408-10	TCGA-A6-2686-10A-01D-2188-10	A	A	.	.	.	.	.	.	.	.	.	.	.	.	.	.	.	c.416T>C	p.Met139Thr	p.M139T	ENST00000338206	1/6	368	217	150	672	671	1	UGT2B15,missense_variant,p.Met139Thr,ENST00000338206,;	G	ENSG00000196620
UGT2B15	0	.	GRCh37	4	69528796	69528796	+	Missense_Mutation	SNP	G	G	A	rs765567860	.	COAD		TCGA-AA-3510-01A-01D-1408-10	TCGA-AA-3510-11A-01D-1408-10	G	G	.	.	.	.	.	.	.	.	.	.	.	.	.	.	.	c.935C>T	p.Ser312Leu	p.S312L	ENST00000338206	3/6	359	292	66	309	309	0	UGT2B15,missense_variant,p.Ser312Leu,ENST00000338206,;	A	ENSG00000196620
UGT2B15	0	.	GRCh37	4	69533852	69533852	+	Missense_Mutation	SNP	C	C	T	rs371697004	.	COAD		TCGA-AA-3510-01A-01D-1408-10	TCGA-AA-3510-11A-01D-1408-10	C	C	.	.	.	.	.	.	.	.	.	.	.	.	.	.	.	c.779G>A	p.Arg260Gln	p.R260Q	ENST00000338206	2/6	345	243	101	301	301	0	UGT2B15,missense_variant,p.Arg260Gln,ENST00000338206,;	T	ENSG00000196620
UGT2B15	0	.	GRCh37	4	69512589	69512589	+	3'UTR	SNP	C	C	A	novel	.	COAD		TCGA-AA-3663-01A-01D-1719-10	TCGA-AA-3663-11A-01D-1719-10	C	C	.	.	.	.	.	.	.	.	.	.	.	.	.	.	.	c.*233G>T	.	.	ENST00000338206	6/6	32	21	11	21	21	0	UGT2B15,3_prime_UTR_variant,,ENST00000338206,;	A	ENSG00000196620
UGT2B15	0	.	GRCh37	4	69519918	69519918	+	Missense_Mutation	SNP	C	C	T	novel	.	COAD		TCGA-AA-3811-01A-01W-0995-10	TCGA-AA-3811-10A-01W-0995-10	C	C	.	.	.	.	.	.	.	.	.	.	.	.	.	.	.	c.1150G>A	p.Ala384Thr	p.A384T	ENST00000338206	5/6	380	343	36	232	231	0	UGT2B15,missense_variant,p.Ala384Thr,ENST00000338206,;	T	ENSG00000196620
UGT2B15	0	.	GRCh37	4	69536035	69536035	+	Missense_Mutation	SNP	A	A	G	.	.	COAD		TCGA-AA-3831-01A-01W-0900-09	TCGA-AA-3831-10A-01W-0900-09	A	A	.	.	.	.	.	.	.	.	.	.	.	.	.	.	.	c.302T>C	p.Val101Ala	p.V101A	ENST00000338206	1/6	632	415	216	761	760	0	UGT2B15,missense_variant,p.Val101Ala,ENST00000338206,;	G	ENSG00000196620
UGT2B15	0	.	GRCh37	4	69512850	69512850	+	Missense_Mutation	SNP	T	T	G	novel	.	COAD		TCGA-AA-3977-01A-01W-0995-10	TCGA-AA-3977-10A-01W-1982-10	T	T	.	.	.	.	.	.	.	.	.	.	.	.	.	.	.	c.1565A>C	p.Lys522Thr	p.K522T	ENST00000338206	6/6	266	251	15	709	709	0	UGT2B15,missense_variant,p.Lys522Thr,ENST00000338206,;	G	ENSG00000196620
UGT2B15	0	.	GRCh37	4	69520848	69520848	+	Missense_Mutation	SNP	C	C	G	rs776711871	.	COAD		TCGA-AD-6964-01A-11D-1924-10	TCGA-AD-6964-10A-01D-1924-10	C	C	.	.	.	.	.	.	.	.	.	.	.	.	.	.	.	c.1058G>C	p.Arg353Pro	p.R353P	ENST00000338206	4/6	350	330	19	461	461	0	UGT2B15,missense_variant,p.Arg353Pro,ENST00000338206,;	G	ENSG00000196620
UGT2B15	0	.	GRCh37	4	69535658	69535658	+	Missense_Mutation	SNP	T	T	C	rs762835403	.	COAD		TCGA-AM-5821-01A-01D-1650-10	TCGA-AM-5821-10A-01D-1650-10	T	T	.	.	.	.	.	.	.	.	.	.	.	.	.	.	.	c.679A>G	p.Ile227Val	p.I227V	ENST00000338206	1/6	213	186	26	299	298	0	UGT2B15,missense_variant,p.Ile227Val,ENST00000338206,;	C	ENSG00000196620
UGT2B15	0	.	GRCh37	4	69536340	69536340	+	5'UTR	SNP	G	G	T	rs754945933	.	COAD		TCGA-AZ-4615-01A-01D-1408-10	TCGA-AZ-4615-10A-01D-1408-10	G	G	.	.	.	.	.	.	.	.	.	.	.	.	.	.	.	c.-4C>A	.	.	ENST00000338206	1/6	88	56	32	65	65	0	UGT2B15,5_prime_UTR_variant,,ENST00000338206,;	T	ENSG00000196620
UGT2B15	0	.	GRCh37	4	69535816	69535816	+	Missense_Mutation	SNP	C	C	T	rs377015117	.	COAD		TCGA-CA-6718-01A-11D-1835-10	TCGA-CA-6718-10A-01D-1835-10	C	C	.	.	.	.	.	.	.	.	.	.	.	.	.	.	.	c.521G>A	p.Arg174Gln	p.R174Q	ENST00000338206	1/6	225	163	62	234	234	0	UGT2B15,missense_variant,p.Arg174Gln,ENST00000338206,;	T	ENSG00000196620
UGT2B15	0	.	GRCh37	4	69535696	69535696	+	Frame_Shift_Del	DEL	T	T	-	.	.	COAD		TCGA-D5-6530-01A-11D-1719-10	TCGA-D5-6530-10A-01D-1719-10	T	T	.	.	.	.	.	.	.	.	.	.	.	.	.	.	.	c.641delA	p.Asn214IlefsTer2	p.N214Ifs*2	ENST00000338206	1/6	895	648	247	150	150	0	UGT2B15,frameshift_variant,p.Asn214IlefsTer2,ENST00000338206,;	-	ENSG00000196620
UGT2B17	0	.	GRCh37	4	69426325	69426325	+	Missense_Mutation	SNP	G	G	A	rs199818226	.	COAD		TCGA-AA-3510-01A-01D-1408-10	TCGA-AA-3510-11A-01D-1408-10	G	G	.	.	.	.	.	.	.	.	.	.	.	.	.	.	.	c.935C>T	p.Ser312Leu	p.S312L	ENST00000317746	3/6	291	252	39	166	166	0	UGT2B17,missense_variant,p.Ser312Leu,ENST00000317746,;	A	ENSG00000197888
UGT2B17	0	.	GRCh37	4	69403384	69403384	+	Nonsense_Mutation	SNP	G	G	A	rs558443905	.	COAD		TCGA-AA-3864-01A-01D-1981-10	TCGA-AA-3864-10A-01W-0995-10	G	G	.	.	.	.	.	.	.	.	.	.	.	.	.	.	.	c.1552C>T	p.Arg518Ter	p.R518*	ENST00000317746	6/6	275	251	24	362	362	0	UGT2B17,stop_gained,p.Arg518Ter,ENST00000317746,;	A	ENSG00000197888
UGT2B17	0	.	GRCh37	4	69433848	69433848	+	Missense_Mutation	SNP	C	C	T	.	.	COAD		TCGA-AA-3977-01A-01W-0995-10	TCGA-AA-3977-10A-01W-1982-10	C	C	.	.	.	.	.	.	.	.	.	.	.	.	.	.	.	c.355G>A	p.Glu119Lys	p.E119K	ENST00000317746	1/6	23	20	3	254	254	0	UGT2B17,missense_variant,p.Glu119Lys,ENST00000317746,;	T	ENSG00000197888
UGT2B17	0	.	GRCh37	4	69431298	69431298	+	Silent	SNP	A	A	G	rs143800988	.	COAD		TCGA-CM-4746-01A-01D-1408-10	TCGA-CM-4746-10A-01D-1408-10	A	A	.	.	.	.	.	.	.	.	.	.	.	.	.	.	.	c.865T>C	p.%3D	p.L289L	ENST00000317746	2/6	453	359	94	314	313	1	UGT2B17,synonymous_variant,p.%3D,ENST00000317746,;	G	ENSG00000197888
UGT2B17	0	.	GRCh37	4	69434087	69434087	+	Missense_Mutation	SNP	A	A	G	novel	.	COAD		TCGA-D5-5540-01A-01D-1650-10	TCGA-D5-5540-10A-01D-1650-10	A	A	.	.	.	.	.	.	.	.	.	.	.	.	.	.	.	c.116T>C	p.Met39Thr	p.M39T	ENST00000317746	1/6	183	160	23	315	314	1	UGT2B17,missense_variant,p.Met39Thr,ENST00000317746,;	G	ENSG00000197888
UGT2B17	0	.	GRCh37	4	69431432	69431432	+	Missense_Mutation	SNP	G	G	C	novel	.	COAD		TCGA-F4-6704-01A-11D-1835-10	TCGA-F4-6704-11A-01D-1835-10	G	G	.	.	.	.	.	.	.	.	.	.	.	.	.	.	.	c.731C>G	p.Pro244Arg	p.P244R	ENST00000317746	2/6	61	48	13	150	149	1	UGT2B17,missense_variant,p.Pro244Arg,ENST00000317746,;	C	ENSG00000197888
UGT2B28	0	.	GRCh37	4	70146727	70146727	+	Missense_Mutation	SNP	A	A	G	.	.	COAD		TCGA-AA-3818-01A-01W-0900-09	TCGA-AA-3818-10A-01W-0900-09	A	A	.	.	.	.	.	.	.	.	.	.	.	.	.	.	.	c.509A>G	p.Tyr170Cys	p.Y170C	ENST00000335568	1/6	273	168	105	340	340	0	UGT2B28,missense_variant,p.Tyr170Cys,ENST00000511240,;UGT2B28,missense_variant,p.Tyr170Cys,ENST00000335568,;	G	ENSG00000135226
UGT2B28	0	.	GRCh37	4	70155427	70155427	+	Silent	SNP	C	C	G	.	.	COAD		TCGA-AA-3848-01A-01W-0900-09	TCGA-AA-3848-10A-01W-0900-09	C	C	.	.	.	.	.	.	.	.	.	.	.	.	.	.	.	c.1047C>G	p.%3D	p.L349L	ENST00000335568	4/6	299	242	56	442	442	0	UGT2B28,synonymous_variant,p.%3D,ENST00000335568,;UGT2B28,intron_variant,,ENST00000511240,;	G	ENSG00000135226
UGT2B28	0	.	GRCh37	4	70155405	70155405	+	Missense_Mutation	SNP	A	A	T	.	.	COAD		TCGA-AA-3947-01A-01D-1981-10	TCGA-AA-3947-10A-01D-1982-10	A	A	.	.	.	.	.	.	.	.	.	.	.	.	.	.	.	c.1025A>T	p.Asn342Ile	p.N342I	ENST00000335568	4/6	97	90	6	148	148	0	UGT2B28,missense_variant,p.Asn342Ile,ENST00000335568,;UGT2B28,intron_variant,,ENST00000511240,;	T	ENSG00000135226
UGT2B28	0	.	GRCh37	4	70146908	70146908	+	Missense_Mutation	SNP	G	G	T	.	.	COAD		TCGA-AA-3984-01A-02D-1981-10	TCGA-AA-3984-10A-01D-1982-10	G	G	.	.	.	.	.	.	.	.	.	.	.	.	.	.	.	c.690G>T	p.Lys230Asn	p.K230N	ENST00000335568	1/6	48	35	13	75	75	0	UGT2B28,missense_variant,p.Lys230Asn,ENST00000511240,;UGT2B28,missense_variant,p.Lys230Asn,ENST00000335568,;	T	ENSG00000135226
UGT2B28	0	.	GRCh37	4	70155432	70155432	+	Missense_Mutation	SNP	C	C	A	rs773835983	.	COAD		TCGA-AA-3984-01A-02D-1981-10	TCGA-AA-3984-10A-01D-1982-10	C	C	.	.	.	.	.	.	.	.	.	.	.	.	.	.	.	c.1052C>A	p.Thr351Asn	p.T351N	ENST00000335568	4/6	179	126	52	269	269	0	UGT2B28,missense_variant,p.Thr351Asn,ENST00000335568,;UGT2B28,intron_variant,,ENST00000511240,;	A	ENSG00000135226
UGT2B28	0	.	GRCh37	4	70146930	70146930	+	Nonsense_Mutation	SNP	G	G	T	.	.	COAD		TCGA-AA-A02K-01A-21W-A096-10	TCGA-AA-A02K-10A-01W-A096-10	G	G	.	.	.	.	.	.	.	.	.	.	.	.	.	.	.	c.712G>T	p.Glu238Ter	p.E238*	ENST00000335568	1/6	51	38	12	53	53	0	UGT2B28,stop_gained,p.Glu238Ter,ENST00000511240,;UGT2B28,stop_gained,p.Glu238Ter,ENST00000335568,;	T	ENSG00000135226
UGT2B28	0	.	GRCh37	4	70146620	70146620	+	Missense_Mutation	SNP	G	G	T	.	.	COAD		TCGA-CA-6718-01A-11D-1835-10	TCGA-CA-6718-10A-01D-1835-10	G	G	.	.	.	.	.	.	.	.	.	.	.	.	.	.	.	c.402G>T	p.Lys134Asn	p.K134N	ENST00000335568	1/6	173	125	48	250	249	1	UGT2B28,missense_variant,p.Lys134Asn,ENST00000511240,;UGT2B28,missense_variant,p.Lys134Asn,ENST00000335568,;	T	ENSG00000135226
UGT2B28	0	.	GRCh37	4	70146649	70146649	+	Missense_Mutation	SNP	G	G	T	.	.	COAD		TCGA-CA-6718-01A-11D-1835-10	TCGA-CA-6718-10A-01D-1835-10	G	G	.	.	.	.	.	.	.	.	.	.	.	.	.	.	.	c.431G>T	p.Arg144Ile	p.R144I	ENST00000335568	1/6	197	147	49	226	225	0	UGT2B28,missense_variant,p.Arg144Ile,ENST00000511240,;UGT2B28,missense_variant,p.Arg144Ile,ENST00000335568,;	T	ENSG00000135226
UGT2B28	0	.	GRCh37	4	70146290	70146290	+	Silent	SNP	A	A	G	novel	.	COAD		TCGA-CK-5913-01A-11D-1650-10	TCGA-CK-5913-10A-01D-1650-10	A	A	.	.	.	.	.	.	.	.	.	.	.	.	.	.	.	c.72A>G	p.%3D	p.G24G	ENST00000335568	1/6	474	317	156	444	443	0	UGT2B28,synonymous_variant,p.%3D,ENST00000511240,;UGT2B28,synonymous_variant,p.%3D,ENST00000335568,;	G	ENSG00000135226
UGT2B28	0	.	GRCh37	4	70146396	70146396	+	Missense_Mutation	SNP	G	G	A	.	.	COAD		TCGA-CM-6171-01A-11D-1650-10	TCGA-CM-6171-10A-01D-1650-10	G	G	.	.	.	.	.	.	.	.	.	.	.	.	.	.	.	c.178G>A	p.Ala60Thr	p.A60T	ENST00000335568	1/6	343	206	136	364	364	0	UGT2B28,missense_variant,p.Ala60Thr,ENST00000511240,;UGT2B28,missense_variant,p.Ala60Thr,ENST00000335568,;	A	ENSG00000135226
UGT2B28	0	.	GRCh37	4	70146520	70146520	+	Missense_Mutation	SNP	A	A	G	rs542343874,rs759941435	.	COAD		TCGA-D5-6540-01A-11D-1719-10	TCGA-D5-6540-10A-01D-1719-10	A	A	.	.	.	.	.	.	.	.	.	.	.	.	.	.	.	c.302A>G	p.Gln101Arg	p.Q101R	ENST00000335568	1/6	492	396	95	275	275	0	UGT2B28,missense_variant,p.Gln101Arg,ENST00000511240,;UGT2B28,missense_variant,p.Gln101Arg,ENST00000335568,;	G	ENSG00000135226
UGT2B28	0	.	GRCh37	4	70146740	70146740	+	Silent	SNP	C	C	T	rs369837892	.	COAD		TCGA-D5-6540-01A-11D-1719-10	TCGA-D5-6540-10A-01D-1719-10	C	C	.	.	.	.	.	.	.	.	.	.	.	.	.	.	.	c.522C>T	p.%3D	p.F174F	ENST00000335568	1/6	239	149	90	111	111	0	UGT2B28,synonymous_variant,p.%3D,ENST00000511240,;UGT2B28,synonymous_variant,p.%3D,ENST00000335568,;	T	ENSG00000135226
UGT2B28	0	.	GRCh37	4	70146756	70146756	+	Missense_Mutation	SNP	A	A	G	.	.	COAD		TCGA-D5-6540-01A-11D-1719-10	TCGA-D5-6540-10A-01D-1719-10	A	A	.	.	.	.	.	.	.	.	.	.	.	.	.	.	.	c.538A>G	p.Ile180Val	p.I180V	ENST00000335568	1/6	212	133	78	100	100	0	UGT2B28,missense_variant,p.Ile180Val,ENST00000511240,;UGT2B28,missense_variant,p.Ile180Val,ENST00000335568,;	G	ENSG00000135226
UGT2B28	0	.	GRCh37	4	70146870	70146870	+	Missense_Mutation	SNP	C	C	A	rs575693723	.	COAD		TCGA-D5-6540-01A-11D-1719-10	TCGA-D5-6540-10A-01D-1719-10	C	C	.	.	.	.	.	.	.	.	.	.	.	.	.	.	.	c.652C>A	p.Leu218Ile	p.L218I	ENST00000335568	1/6	42	28	14	28	28	0	UGT2B28,missense_variant,p.Leu218Ile,ENST00000511240,;UGT2B28,missense_variant,p.Leu218Ile,ENST00000335568,;	A	ENSG00000135226
UGT2B28	0	.	GRCh37	4	70146872	70146872	+	Silent	SNP	T	T	G	.	.	COAD		TCGA-D5-6931-01A-11D-1924-10	TCGA-D5-6931-10A-01D-1924-10	T	T	.	.	.	.	.	.	.	.	.	.	.	.	.	.	.	c.654T>G	p.%3D	p.L218L	ENST00000335568	1/6	73	53	19	52	52	0	UGT2B28,synonymous_variant,p.%3D,ENST00000511240,;UGT2B28,synonymous_variant,p.%3D,ENST00000335568,;	G	ENSG00000135226
UGT2B28	0	.	GRCh37	4	70146882	70146882	+	Missense_Mutation	SNP	T	T	G	rs779238247	.	COAD		TCGA-D5-6931-01A-11D-1924-10	TCGA-D5-6931-10A-01D-1924-10	T	T	.	.	.	.	.	.	.	.	.	.	.	.	.	.	.	c.664T>G	p.Phe222Val	p.F222V	ENST00000335568	1/6	54	41	13	39	39	0	UGT2B28,missense_variant,p.Phe222Val,ENST00000511240,;UGT2B28,missense_variant,p.Phe222Val,ENST00000335568,;	G	ENSG00000135226
UGT2B4	0	.	GRCh37	4	70361048	70361048	+	Missense_Mutation	SNP	A	A	G	novel	.	COAD		TCGA-5M-AAT6-01A-11D-A40P-10	TCGA-5M-AAT6-10A-01D-A40P-10	A	A	.	.	.	.	.	.	.	.	.	.	.	.	.	.	.	c.532T>C	p.Tyr178His	p.Y178H	ENST00000305107	1/6	202	176	25	200	200	0	UGT2B4,missense_variant,p.Tyr178His,ENST00000305107,;UGT2B4,missense_variant,p.Tyr178His,ENST00000512583,;UGT2B4,missense_variant,p.Tyr42His,ENST00000381096,;UGT2B4,downstream_gene_variant,,ENST00000510114,;UGT2B4,non_coding_transcript_exon_variant,,ENST00000502655,;UGT2B4,intron_variant,,ENST00000506580,;UGT2B4,intron_variant,,ENST00000503836,;	G	ENSG00000156096
UGT2B4	0	.	GRCh37	4	70346085	70346085	+	3'UTR	SNP	A	A	G	novel	.	COAD		TCGA-A6-5665-01A-01D-1650-10	TCGA-A6-5665-10A-01D-1650-10	A	A	.	.	.	.	.	.	.	.	.	.	.	.	.	.	.	c.*267T>C	.	.	ENST00000305107	6/6	10	5	5	14	14	0	UGT2B4,3_prime_UTR_variant,,ENST00000305107,;UGT2B4,3_prime_UTR_variant,,ENST00000512583,;UGT2B4,3_prime_UTR_variant,,ENST00000381096,;AC108078.1,downstream_gene_variant,,ENST00000583573,;UGT2B4,non_coding_transcript_exon_variant,,ENST00000506580,;UGT2B4,downstream_gene_variant,,ENST00000502655,;	G	ENSG00000156096
UGT2B4	0	.	GRCh37	4	70346533	70346533	+	Missense_Mutation	SNP	C	C	T	.	.	COAD		TCGA-A6-6648-01A-11D-1771-10	TCGA-A6-6648-10A-01D-1771-10	C	C	.	.	.	.	.	.	.	.	.	.	.	.	.	.	.	c.1406G>A	p.Arg469His	p.R469H	ENST00000305107	6/6	152	133	19	117	116	0	UGT2B4,missense_variant,p.Arg469His,ENST00000305107,;UGT2B4,missense_variant,p.Arg333His,ENST00000381096,;UGT2B4,3_prime_UTR_variant,,ENST00000512583,;AC108078.1,downstream_gene_variant,,ENST00000583573,;UGT2B4,non_coding_transcript_exon_variant,,ENST00000506580,;UGT2B4,downstream_gene_variant,,ENST00000502655,;	T	ENSG00000156096
UGT2B4	0	.	GRCh37	4	70346495	70346495	+	Missense_Mutation	SNP	C	C	T	rs767837637	.	COAD		TCGA-AA-3510-01A-01D-1408-10	TCGA-AA-3510-11A-01D-1408-10	C	C	.	.	.	.	.	.	.	.	.	.	.	.	.	.	.	c.1444G>A	p.Asp482Asn	p.D482N	ENST00000305107	6/6	128	74	53	94	94	0	UGT2B4,missense_variant,p.Asp482Asn,ENST00000305107,;UGT2B4,missense_variant,p.Asp346Asn,ENST00000381096,;UGT2B4,3_prime_UTR_variant,,ENST00000512583,;AC108078.1,downstream_gene_variant,,ENST00000583573,;UGT2B4,non_coding_transcript_exon_variant,,ENST00000506580,;UGT2B4,downstream_gene_variant,,ENST00000502655,;	T	ENSG00000156096
UGT2B4	0	.	GRCh37	4	70361375	70361375	+	Missense_Mutation	SNP	G	G	A	rs767028471	.	COAD		TCGA-AA-3949-01A-01W-0995-10	TCGA-AA-3949-10A-01W-1982-10	G	G	.	.	.	.	.	.	.	.	.	.	.	.	.	.	.	c.205C>T	p.Pro69Ser	p.P69S	ENST00000305107	1/6	130	119	11	153	153	0	UGT2B4,missense_variant,p.Pro69Ser,ENST00000305107,;UGT2B4,missense_variant,p.Pro69Ser,ENST00000512583,;UGT2B4,intron_variant,,ENST00000381096,;UGT2B4,downstream_gene_variant,,ENST00000510114,;UGT2B4,non_coding_transcript_exon_variant,,ENST00000506580,;UGT2B4,intron_variant,,ENST00000503836,;UGT2B4,intron_variant,,ENST00000502655,;	A	ENSG00000156096
UGT2B4	0	.	GRCh37	4	70361597	70361597	+	5'UTR	SNP	C	C	A	rs755043672	.	COAD		TCGA-AA-3977-01A-01W-0995-10	TCGA-AA-3977-10A-01W-1982-10	C	C	.	.	.	.	.	.	.	.	.	.	.	.	.	.	.	c.-18G>T	.	.	ENST00000305107	1/6	18	11	7	165	165	0	UGT2B4,5_prime_UTR_variant,,ENST00000510114,;UGT2B4,5_prime_UTR_variant,,ENST00000305107,;UGT2B4,intron_variant,,ENST00000381096,;UGT2B4,upstream_gene_variant,,ENST00000512583,;UGT2B4,non_coding_transcript_exon_variant,,ENST00000506580,;UGT2B4,intron_variant,,ENST00000503836,;UGT2B4,intron_variant,,ENST00000502655,;	A	ENSG00000156096
UGT2B4	0	.	GRCh37	4	70346269	70346269	+	3'UTR	SNP	C	C	A	novel	.	COAD		TCGA-AA-A00N-01A-02D-A17O-10	TCGA-AA-A00N-10A-01D-A17O-10	C	C	.	.	.	.	.	.	.	.	.	.	.	.	.	.	.	c.*83G>T	.	.	ENST00000305107	6/6	113	72	41	24	24	0	UGT2B4,3_prime_UTR_variant,,ENST00000305107,;UGT2B4,3_prime_UTR_variant,,ENST00000512583,;UGT2B4,3_prime_UTR_variant,,ENST00000381096,;AC108078.1,downstream_gene_variant,,ENST00000583573,;UGT2B4,non_coding_transcript_exon_variant,,ENST00000506580,;UGT2B4,downstream_gene_variant,,ENST00000502655,;	A	ENSG00000156096
UGT2B4	0	.	GRCh37	4	70350942	70350942	+	Missense_Mutation	SNP	C	C	T	rs375061246	.	COAD		TCGA-AM-5821-01A-01D-1650-10	TCGA-AM-5821-10A-01D-1650-10	C	C	.	.	.	.	.	.	.	.	.	.	.	.	.	.	.	c.1294G>A	p.Val432Ile	p.V432I	ENST00000305107	5/6	465	312	153	672	671	1	UGT2B4,missense_variant,p.Val432Ile,ENST00000305107,;UGT2B4,missense_variant,p.Val296Ile,ENST00000381096,;UGT2B4,intron_variant,,ENST00000512583,;UGT2B4,non_coding_transcript_exon_variant,,ENST00000502655,;UGT2B4,intron_variant,,ENST00000506580,;UGT2B4,downstream_gene_variant,,ENST00000503836,;	T	ENSG00000156096
UGT2B4	0	.	GRCh37	4	70346358	70346358	+	Silent	SNP	T	T	C	rs752751624	.	COAD		TCGA-CA-5797-01A-01D-1650-10	TCGA-CA-5797-10A-01D-1650-10	T	T	.	.	.	.	.	.	.	.	.	.	.	.	.	.	.	c.1581A>G	p.%3D	p.R527R	ENST00000305107	6/6	344	305	39	291	290	1	UGT2B4,synonymous_variant,p.%3D,ENST00000305107,;UGT2B4,synonymous_variant,p.%3D,ENST00000381096,;UGT2B4,3_prime_UTR_variant,,ENST00000512583,;AC108078.1,downstream_gene_variant,,ENST00000583573,;UGT2B4,non_coding_transcript_exon_variant,,ENST00000506580,;UGT2B4,downstream_gene_variant,,ENST00000502655,;	C	ENSG00000156096
UGT2B4	0	.	GRCh37	4	70352409	70352409	+	Silent	SNP	C	C	T	.	.	COAD		TCGA-CK-5915-01A-11D-1650-10	TCGA-CK-5915-10A-01D-1650-10	C	C	.	.	.	.	.	.	.	.	.	.	.	.	.	.	.	c.1008G>A	p.%3D	p.L336L	ENST00000305107	4/6	307	224	83	208	208	0	UGT2B4,synonymous_variant,p.%3D,ENST00000305107,;UGT2B4,synonymous_variant,p.%3D,ENST00000512583,;UGT2B4,synonymous_variant,p.%3D,ENST00000381096,;UGT2B4,non_coding_transcript_exon_variant,,ENST00000506580,;UGT2B4,non_coding_transcript_exon_variant,,ENST00000502655,;UGT2B4,downstream_gene_variant,,ENST00000503836,;	T	ENSG00000156096
UGT2B4	0	.	GRCh37	4	70346234	70346234	+	3'UTR	SNP	T	T	A	novel	.	COAD		TCGA-CM-6171-01A-11D-1650-10	TCGA-CM-6171-10A-01D-1650-10	T	T	.	.	.	.	.	.	.	.	.	.	.	.	.	.	.	c.*118A>T	.	.	ENST00000305107	6/6	58	35	23	74	74	0	UGT2B4,3_prime_UTR_variant,,ENST00000305107,;UGT2B4,3_prime_UTR_variant,,ENST00000512583,;UGT2B4,3_prime_UTR_variant,,ENST00000381096,;AC108078.1,downstream_gene_variant,,ENST00000583573,;UGT2B4,non_coding_transcript_exon_variant,,ENST00000506580,;UGT2B4,downstream_gene_variant,,ENST00000502655,;	A	ENSG00000156096
UGT2B4	0	.	GRCh37	4	70361046	70361046	+	Silent	SNP	G	G	A	rs370531105	.	COAD		TCGA-DM-A285-01A-11D-A16V-10	TCGA-DM-A285-10A-01D-A16V-10	G	G	.	.	.	.	.	.	.	.	.	.	.	.	.	.	.	c.534C>T	p.%3D	p.Y178Y	ENST00000305107	1/6	79	43	35	111	111	0	UGT2B4,synonymous_variant,p.%3D,ENST00000305107,;UGT2B4,synonymous_variant,p.%3D,ENST00000512583,;UGT2B4,synonymous_variant,p.%3D,ENST00000381096,;UGT2B4,downstream_gene_variant,,ENST00000510114,;UGT2B4,non_coding_transcript_exon_variant,,ENST00000502655,;UGT2B4,intron_variant,,ENST00000506580,;UGT2B4,intron_variant,,ENST00000503836,;	A	ENSG00000156096
UGT2B4	0	.	GRCh37	4	70346510	70346510	+	Missense_Mutation	SNP	G	G	A	rs778378649	.	COAD		TCGA-F4-6569-01A-11D-1771-10	TCGA-F4-6569-10A-01D-1771-10	G	G	.	.	.	.	.	.	.	.	.	.	.	.	.	.	.	c.1429C>T	p.Arg477Trp	p.R477W	ENST00000305107	6/6	134	108	26	139	138	1	UGT2B4,missense_variant,p.Arg477Trp,ENST00000305107,;UGT2B4,missense_variant,p.Arg341Trp,ENST00000381096,;UGT2B4,3_prime_UTR_variant,,ENST00000512583,;AC108078.1,downstream_gene_variant,,ENST00000583573,;UGT2B4,non_coding_transcript_exon_variant,,ENST00000506580,;UGT2B4,downstream_gene_variant,,ENST00000502655,;	A	ENSG00000156096
UGT2B4	0	.	GRCh37	4	70346407	70346407	+	Missense_Mutation	SNP	C	C	G	.	.	COAD		TCGA-G4-6625-01A-21D-1771-10	TCGA-G4-6625-11A-01D-1771-10	C	C	.	.	.	.	.	.	.	.	.	.	.	.	.	.	.	c.1532G>C	p.Cys511Ser	p.C511S	ENST00000305107	6/6	146	119	27	332	332	0	UGT2B4,missense_variant,p.Cys511Ser,ENST00000305107,;UGT2B4,missense_variant,p.Cys375Ser,ENST00000381096,;UGT2B4,3_prime_UTR_variant,,ENST00000512583,;AC108078.1,downstream_gene_variant,,ENST00000583573,;UGT2B4,non_coding_transcript_exon_variant,,ENST00000506580,;UGT2B4,downstream_gene_variant,,ENST00000502655,;	G	ENSG00000156096
UGT2B7	0	.	GRCh37	4	69978685	69978685	+	3'UTR	DEL	A	A	-	rs576165032	.	COAD		TCGA-A6-5665-01A-01D-1650-10	TCGA-A6-5665-10A-01D-1650-10	A	A	.	.	.	.	.	.	.	.	.	.	.	.	.	.	.	c.*236delA	.	.	ENST00000305231	6/6	21	13	7	12	12	0	UGT2B7,3_prime_UTR_variant,,ENST00000305231,;UGT2B7,3_prime_UTR_variant,,ENST00000508661,;UGT2B7,downstream_gene_variant,,ENST00000502942,;UGT2B7,downstream_gene_variant,,ENST00000509763,;	-	ENSG00000171234
UGT2B7	0	.	GRCh37	4	69974041	69974041	+	Splice_Site	SNP	G	G	A	rs753618139	.	COAD		TCGA-A6-6781-01A-22D-A270-10	TCGA-A6-6781-10A-01D-A270-10	G	G	.	.	.	.	.	.	.	.	.	.	.	.	.	.	.	c.1310+1G>A	.	p.X437_splice	ENST00000305231	.	297	225	71	282	281	0	UGT2B7,splice_donor_variant,,ENST00000305231,;UGT2B7,intron_variant,,ENST00000508661,;UGT2B7,downstream_gene_variant,,ENST00000502942,;UGT2B7,intron_variant,,ENST00000509763,;	A	ENSG00000171234
UGT2B7	0	.	GRCh37	4	69973919	69973919	+	Missense_Mutation	SNP	G	G	T	rs543169852	.	COAD		TCGA-AA-3712-01A-21D-1719-10	TCGA-AA-3712-11A-01D-1719-10	G	G	.	.	.	.	.	.	.	.	.	.	.	.	.	.	.	c.1189G>T	p.Ala397Ser	p.A397S	ENST00000305231	5/6	559	502	56	296	296	0	UGT2B7,missense_variant,p.Ala397Ser,ENST00000305231,;UGT2B7,missense_variant,p.Ala148Ser,ENST00000502942,;UGT2B7,intron_variant,,ENST00000508661,;UGT2B7,intron_variant,,ENST00000509763,;	T	ENSG00000171234
UGT2B7	0	.	GRCh37	4	69973920	69973920	+	Missense_Mutation	SNP	C	C	G	rs563256432	.	COAD		TCGA-AA-3712-01A-21D-1719-10	TCGA-AA-3712-11A-01D-1719-10	C	C	.	.	.	.	.	.	.	.	.	.	.	.	.	.	.	c.1190C>G	p.Ala397Gly	p.A397G	ENST00000305231	5/6	561	503	57	299	299	0	UGT2B7,missense_variant,p.Ala397Gly,ENST00000305231,;UGT2B7,missense_variant,p.Ala148Gly,ENST00000502942,;UGT2B7,intron_variant,,ENST00000508661,;UGT2B7,intron_variant,,ENST00000509763,;	G	ENSG00000171234
UGT2B7	0	.	GRCh37	4	69962369	69962369	+	Missense_Mutation	SNP	A	A	G	.	.	COAD		TCGA-AA-3984-01A-02D-1981-10	TCGA-AA-3984-10A-01D-1982-10	A	A	.	.	.	.	.	.	.	.	.	.	.	.	.	.	.	c.131A>G	p.Asp44Gly	p.D44G	ENST00000305231	1/6	165	108	57	264	263	0	UGT2B7,missense_variant,p.Asp44Gly,ENST00000305231,;UGT2B7,missense_variant,p.Asp44Gly,ENST00000508661,;UGT2B7,intron_variant,,ENST00000502942,;UGT2B7,intron_variant,,ENST00000509763,;	G	ENSG00000171234
UGT2B7	0	.	GRCh37	4	69974024	69974024	+	Missense_Mutation	SNP	G	G	T	.	.	COAD		TCGA-AA-3984-01A-02D-1981-10	TCGA-AA-3984-10A-01D-1982-10	G	G	.	.	.	.	.	.	.	.	.	.	.	.	.	.	.	c.1294G>T	p.Val432Leu	p.V432L	ENST00000305231	5/6	432	276	156	549	549	0	UGT2B7,missense_variant,p.Val432Leu,ENST00000305231,;UGT2B7,intron_variant,,ENST00000508661,;UGT2B7,downstream_gene_variant,,ENST00000502942,;UGT2B7,intron_variant,,ENST00000509763,;	T	ENSG00000171234
UGT2B7	0	.	GRCh37	4	69964387	69964387	+	Missense_Mutation	SNP	C	C	A	.	.	COAD		TCGA-AA-A022-01A-21D-A17O-10	TCGA-AA-A022-11A-11D-A17O-10	C	C	.	.	.	.	.	.	.	.	.	.	.	.	.	.	.	c.851C>A	p.Pro284His	p.P284H	ENST00000305231	2/6	299	229	70	358	358	0	UGT2B7,missense_variant,p.Pro284His,ENST00000305231,;UGT2B7,missense_variant,p.Pro284His,ENST00000508661,;UGT2B7,missense_variant,p.Pro35His,ENST00000502942,;UGT2B7,non_coding_transcript_exon_variant,,ENST00000509763,;	A	ENSG00000171234
UGT2B7	0	.	GRCh37	4	69972894	69972894	+	Missense_Mutation	SNP	T	T	G	novel	.	COAD		TCGA-CA-6718-01A-11D-1835-10	TCGA-CA-6718-10A-01D-1835-10	T	T	.	.	.	.	.	.	.	.	.	.	.	.	.	.	.	c.1004T>G	p.Val335Gly	p.V335G	ENST00000305231	4/6	129	93	35	162	161	1	UGT2B7,missense_variant,p.Val335Gly,ENST00000305231,;UGT2B7,missense_variant,p.Val335Gly,ENST00000508661,;UGT2B7,missense_variant,p.Val86Gly,ENST00000502942,;UGT2B7,splice_region_variant,,ENST00000509763,;	G	ENSG00000171234
UGT2B7	0	.	GRCh37	4	69978562	69978562	+	3'UTR	SNP	A	A	G	novel	.	COAD		TCGA-CM-4743-01A-01D-1719-10	TCGA-CM-4743-10A-01D-1719-10	A	A	.	.	.	.	.	.	.	.	.	.	.	.	.	.	.	c.*108A>G	.	.	ENST00000305231	6/6	25	16	9	36	36	0	UGT2B7,3_prime_UTR_variant,,ENST00000305231,;UGT2B7,3_prime_UTR_variant,,ENST00000508661,;UGT2B7,downstream_gene_variant,,ENST00000502942,;UGT2B7,downstream_gene_variant,,ENST00000509763,;	G	ENSG00000171234
UGT2B7	0	.	GRCh37	4	69978272	69978272	+	Missense_Mutation	SNP	C	C	A	.	.	COAD		TCGA-CM-6171-01A-11D-1650-10	TCGA-CM-6171-10A-01D-1650-10	C	C	.	.	.	.	.	.	.	.	.	.	.	.	.	.	.	c.1408C>A	p.His470Asn	p.H470N	ENST00000305231	6/6	270	154	116	287	287	0	UGT2B7,missense_variant,p.His470Asn,ENST00000305231,;UGT2B7,3_prime_UTR_variant,,ENST00000508661,;UGT2B7,downstream_gene_variant,,ENST00000502942,;UGT2B7,non_coding_transcript_exon_variant,,ENST00000509763,;	A	ENSG00000171234
UGT3A1	0	.	GRCh37	5	35965630	35965630	+	Missense_Mutation	SNP	C	C	A	rs759699054	.	COAD		TCGA-A6-2686-01A-01D-1408-10	TCGA-A6-2686-10A-01D-2188-10	C	C	.	.	.	.	.	.	.	.	.	.	.	.	.	.	.	c.701G>T	p.Arg234Met	p.R234M	ENST00000274278	4/7	86	48	38	240	240	0	UGT3A1,missense_variant,p.Arg234Met,ENST00000274278,;UGT3A1,missense_variant,p.Arg200Met,ENST00000507113,;UGT3A1,missense_variant,p.Arg180Met,ENST00000333811,;UGT3A1,missense_variant,p.Arg234Met,ENST00000503189,;UGT3A1,intron_variant,,ENST00000513233,;UGT3A1,3_prime_UTR_variant,,ENST00000515801,;	A	ENSG00000145626
UGT3A1	0	.	GRCh37	5	35965841	35965841	+	Missense_Mutation	SNP	C	C	T	.	.	COAD		TCGA-A6-6780-01A-11D-A270-10	TCGA-A6-6780-10A-01D-A270-10	C	C	.	.	.	.	.	.	.	.	.	.	.	.	.	.	.	c.490G>A	p.Ala164Thr	p.A164T	ENST00000274278	4/7	159	95	64	133	133	0	UGT3A1,missense_variant,p.Ala164Thr,ENST00000274278,;UGT3A1,missense_variant,p.Ala130Thr,ENST00000507113,;UGT3A1,missense_variant,p.Ala110Thr,ENST00000333811,;UGT3A1,missense_variant,p.Ala164Thr,ENST00000503189,;UGT3A1,intron_variant,,ENST00000513233,;UGT3A1,3_prime_UTR_variant,,ENST00000515801,;	T	ENSG00000145626
UGT3A1	0	.	GRCh37	5	35957367	35957367	+	Missense_Mutation	SNP	C	C	T	.	.	COAD		TCGA-A6-6781-01A-22D-A270-10	TCGA-A6-6781-10A-01D-A270-10	C	C	.	.	.	.	.	.	.	.	.	.	.	.	.	.	.	c.998G>A	p.Ser333Asn	p.S333N	ENST00000274278	5/7	80	72	8	96	96	0	UGT3A1,missense_variant,p.Ser333Asn,ENST00000274278,;UGT3A1,missense_variant,p.Ser299Asn,ENST00000507113,;UGT3A1,missense_variant,p.Ser333Asn,ENST00000503189,;UGT3A1,downstream_gene_variant,,ENST00000333811,;UGT3A1,non_coding_transcript_exon_variant,,ENST00000513233,;UGT3A1,3_prime_UTR_variant,,ENST00000515801,;	T	ENSG00000145626
UGT3A1	0	.	GRCh37	5	35957404	35957404	+	Missense_Mutation	SNP	C	C	A	.	.	COAD		TCGA-A6-6782-01A-11D-1835-10	TCGA-A6-6782-10A-01D-1835-10	C	C	.	.	.	.	.	.	.	.	.	.	.	.	.	.	.	c.961G>T	p.Ala321Ser	p.A321S	ENST00000274278	5/7	65	46	18	49	49	0	UGT3A1,missense_variant,p.Ala321Ser,ENST00000274278,;UGT3A1,missense_variant,p.Ala287Ser,ENST00000507113,;UGT3A1,missense_variant,p.Ala321Ser,ENST00000503189,;UGT3A1,downstream_gene_variant,,ENST00000333811,;UGT3A1,non_coding_transcript_exon_variant,,ENST00000513233,;UGT3A1,3_prime_UTR_variant,,ENST00000515801,;	A	ENSG00000145626
UGT3A1	0	.	GRCh37	5	35955790	35955790	+	Missense_Mutation	SNP	C	C	T	rs147780586	.	COAD		TCGA-AA-3947-01A-01D-1981-10	TCGA-AA-3947-10A-01D-1982-10	C	C	.	.	.	.	.	.	.	.	.	.	.	.	.	.	.	c.1252G>A	p.Asp418Asn	p.D418N	ENST00000274278	6/7	263	157	106	296	296	0	UGT3A1,missense_variant,p.Asp418Asn,ENST00000274278,;UGT3A1,missense_variant,p.Asp384Asn,ENST00000507113,;UGT3A1,missense_variant,p.Asp418Asn,ENST00000503189,;UGT3A1,downstream_gene_variant,,ENST00000513233,;UGT3A1,3_prime_UTR_variant,,ENST00000515801,;	T	ENSG00000145626
UGT3A1	0	.	GRCh37	5	35955827	35955827	+	Silent	SNP	A	A	G	novel	.	COAD		TCGA-AA-3947-01A-01D-1981-10	TCGA-AA-3947-10A-01D-1982-10	A	A	.	.	.	.	.	.	.	.	.	.	.	.	.	.	.	c.1215T>C	p.%3D	p.N405N	ENST00000274278	6/7	229	178	51	263	263	0	UGT3A1,synonymous_variant,p.%3D,ENST00000274278,;UGT3A1,synonymous_variant,p.%3D,ENST00000507113,;UGT3A1,synonymous_variant,p.%3D,ENST00000503189,;UGT3A1,downstream_gene_variant,,ENST00000513233,;UGT3A1,3_prime_UTR_variant,,ENST00000515801,;	G	ENSG00000145626
UGT3A1	0	.	GRCh37	5	35954451	35954451	+	Silent	SNP	G	G	A	.	.	COAD		TCGA-AA-3952-01A-01W-0995-10	TCGA-AA-3952-10A-01W-0995-10	G	G	.	.	.	.	.	.	.	.	.	.	.	.	.	.	.	c.1425C>T	p.%3D	p.A475A	ENST00000274278	7/7	76	44	32	64	64	0	UGT3A1,synonymous_variant,p.%3D,ENST00000274278,;UGT3A1,downstream_gene_variant,,ENST00000507113,;UGT3A1,downstream_gene_variant,,ENST00000503189,;UGT3A1,downstream_gene_variant,,ENST00000513233,;UGT3A1,3_prime_UTR_variant,,ENST00000515801,;	A	ENSG00000145626
UGT3A1	0	.	GRCh37	5	35957312	35957312	+	Nonsense_Mutation	SNP	C	C	T	.	.	COAD		TCGA-AA-3984-01A-02D-1981-10	TCGA-AA-3984-10A-01D-1982-10	C	C	.	.	.	.	.	.	.	.	.	.	.	.	.	.	.	c.1053G>A	p.Trp351Ter	p.W351*	ENST00000274278	5/7	138	100	38	186	186	0	UGT3A1,stop_gained,p.Trp351Ter,ENST00000274278,;UGT3A1,stop_gained,p.Trp317Ter,ENST00000507113,;UGT3A1,stop_gained,p.Trp351Ter,ENST00000503189,;UGT3A1,downstream_gene_variant,,ENST00000333811,;UGT3A1,non_coding_transcript_exon_variant,,ENST00000513233,;UGT3A1,3_prime_UTR_variant,,ENST00000515801,;	T	ENSG00000145626
UGT3A1	0	.	GRCh37	5	35965688	35965688	+	Missense_Mutation	SNP	A	A	G	.	.	COAD		TCGA-AD-6964-01A-11D-1924-10	TCGA-AD-6964-10A-01D-1924-10	A	A	.	.	.	.	.	.	.	.	.	.	.	.	.	.	.	c.643T>C	p.Trp215Arg	p.W215R	ENST00000274278	4/7	128	116	12	154	154	0	UGT3A1,missense_variant,p.Trp215Arg,ENST00000274278,;UGT3A1,missense_variant,p.Trp181Arg,ENST00000507113,;UGT3A1,missense_variant,p.Trp161Arg,ENST00000333811,;UGT3A1,missense_variant,p.Trp215Arg,ENST00000503189,;UGT3A1,intron_variant,,ENST00000513233,;UGT3A1,3_prime_UTR_variant,,ENST00000515801,;	G	ENSG00000145626
UGT3A1	0	.	GRCh37	5	35965919	35965919	+	Missense_Mutation	SNP	T	T	C	rs745770060	.	COAD		TCGA-AD-6964-01A-11D-1924-10	TCGA-AD-6964-10A-01D-1924-10	T	T	.	.	.	.	.	.	.	.	.	.	.	.	.	.	.	c.412A>G	p.Asn138Asp	p.N138D	ENST00000274278	4/7	64	57	6	66	66	0	UGT3A1,missense_variant,p.Asn138Asp,ENST00000274278,;UGT3A1,missense_variant,p.Asn104Asp,ENST00000507113,;UGT3A1,missense_variant,p.Asn84Asp,ENST00000333811,;UGT3A1,missense_variant,p.Asn138Asp,ENST00000503189,;UGT3A1,intron_variant,,ENST00000513233,;UGT3A1,3_prime_UTR_variant,,ENST00000515801,;	C	ENSG00000145626
UGT3A1	0	.	GRCh37	5	35965797	35965797	+	Silent	SNP	T	T	C	.	.	COAD		TCGA-CM-5349-01A-21D-1719-10	TCGA-CM-5349-10A-01D-1719-10	T	T	.	.	.	.	.	.	.	.	.	.	.	.	.	.	.	c.534A>G	p.%3D	p.P178P	ENST00000274278	4/7	237	185	52	210	210	0	UGT3A1,synonymous_variant,p.%3D,ENST00000274278,;UGT3A1,synonymous_variant,p.%3D,ENST00000507113,;UGT3A1,synonymous_variant,p.%3D,ENST00000333811,;UGT3A1,synonymous_variant,p.%3D,ENST00000503189,;UGT3A1,intron_variant,,ENST00000513233,;UGT3A1,3_prime_UTR_variant,,ENST00000515801,;	C	ENSG00000145626
UGT3A1	0	.	GRCh37	5	35955920	35955920	+	Silent	SNP	G	G	A	rs773645359	.	COAD		TCGA-D5-6930-01A-11D-1924-10	TCGA-D5-6930-10A-01D-1924-10	G	G	.	.	.	.	.	.	.	.	.	.	.	.	.	.	.	c.1122C>T	p.%3D	p.S374S	ENST00000274278	6/7	79	71	8	49	49	0	UGT3A1,synonymous_variant,p.%3D,ENST00000274278,;UGT3A1,synonymous_variant,p.%3D,ENST00000507113,;UGT3A1,synonymous_variant,p.%3D,ENST00000503189,;UGT3A1,downstream_gene_variant,,ENST00000333811,;UGT3A1,non_coding_transcript_exon_variant,,ENST00000513233,;UGT3A1,3_prime_UTR_variant,,ENST00000515801,;	A	ENSG00000145626
UGT3A1	0	.	GRCh37	5	35954297	35954297	+	3'UTR	SNP	C	C	T	rs764027392	.	COAD		TCGA-G4-6302-01A-11D-1719-10	TCGA-G4-6302-10A-01D-1719-10	C	C	.	.	.	.	.	.	.	.	.	.	.	.	.	.	.	c.*7G>A	.	.	ENST00000274278	7/7	113	101	12	42	42	0	UGT3A1,3_prime_UTR_variant,,ENST00000274278,;UGT3A1,downstream_gene_variant,,ENST00000507113,;UGT3A1,downstream_gene_variant,,ENST00000503189,;UGT3A1,downstream_gene_variant,,ENST00000513233,;UGT3A1,3_prime_UTR_variant,,ENST00000515801,;	T	ENSG00000145626
UGT3A1	0	.	GRCh37	5	35991364	35991364	+	5'UTR	SNP	G	G	A	novel	.	COAD		TCGA-G4-6320-01A-11D-1719-10	TCGA-G4-6320-10A-01D-1720-10	G	G	.	.	.	.	.	.	.	.	.	.	.	.	.	.	.	c.-22C>T	.	.	ENST00000274278	1/7	97	81	16	115	115	0	UGT3A1,5_prime_UTR_variant,,ENST00000274278,;UGT3A1,5_prime_UTR_variant,,ENST00000507113,;UGT3A1,5_prime_UTR_variant,,ENST00000503189,;UGT3A1,intron_variant,,ENST00000333811,;UGT3A1,non_coding_transcript_exon_variant,,ENST00000513233,;UGT3A1,5_prime_UTR_variant,,ENST00000515801,;	A	ENSG00000145626
UGT3A1	0	.	GRCh37	5	35955786	35955786	+	Missense_Mutation	SNP	G	G	A	.	.	COAD		TCGA-G4-6628-01A-11D-1835-10	TCGA-G4-6628-10A-01D-1835-10	G	G	.	.	.	.	.	.	.	.	.	.	.	.	.	.	.	c.1256C>T	p.Thr419Ile	p.T419I	ENST00000274278	6/7	119	93	26	136	136	0	UGT3A1,missense_variant,p.Thr419Ile,ENST00000274278,;UGT3A1,missense_variant,p.Thr385Ile,ENST00000507113,;UGT3A1,missense_variant,p.Thr419Ile,ENST00000503189,;UGT3A1,downstream_gene_variant,,ENST00000513233,;UGT3A1,3_prime_UTR_variant,,ENST00000515801,;	A	ENSG00000145626
UGT3A2	0	.	GRCh37	5	36049038	36049038	+	Missense_Mutation	SNP	C	C	T	.	.	COAD		TCGA-A6-5661-01A-01D-1650-10	TCGA-A6-5661-10A-01D-1650-10	C	C	.	.	.	.	.	.	.	.	.	.	.	.	.	.	.	c.796G>A	p.Val266Ile	p.V266I	ENST00000282507	4/7	264	160	104	126	126	0	UGT3A2,missense_variant,p.Val232Ile,ENST00000513300,;UGT3A2,missense_variant,p.Val266Ile,ENST00000282507,;UGT3A2,intron_variant,,ENST00000545528,;UGT3A2,downstream_gene_variant,,ENST00000515131,;UGT3A2,intron_variant,,ENST00000504954,;UGT3A2,intron_variant,,ENST00000504685,;	T	ENSG00000168671
UGT3A2	0	.	GRCh37	5	36038001	36038001	+	Missense_Mutation	SNP	A	A	G	.	.	COAD		TCGA-AA-3492-01A-01D-1408-10	TCGA-AA-3492-11A-01D-1408-10	A	A	.	.	.	.	.	.	.	.	.	.	.	.	.	.	.	c.1193T>C	p.Met398Thr	p.M398T	ENST00000282507	6/7	48	36	11	55	55	0	UGT3A2,missense_variant,p.Met364Thr,ENST00000513300,;UGT3A2,missense_variant,p.Met96Thr,ENST00000545528,;UGT3A2,missense_variant,p.Met398Thr,ENST00000282507,;UGT3A2,downstream_gene_variant,,ENST00000504954,;UGT3A2,3_prime_UTR_variant,,ENST00000504685,;	G	ENSG00000168671
UGT3A2	0	.	GRCh37	5	36037951	36037951	+	Missense_Mutation	SNP	G	G	A	.	.	COAD		TCGA-AA-3510-01A-01D-1408-10	TCGA-AA-3510-11A-01D-1408-10	G	G	.	.	.	.	.	.	.	.	.	.	.	.	.	.	.	c.1243C>T	p.Leu415Phe	p.L415F	ENST00000282507	6/7	85	64	21	48	48	0	UGT3A2,missense_variant,p.Leu381Phe,ENST00000513300,;UGT3A2,missense_variant,p.Leu113Phe,ENST00000545528,;UGT3A2,missense_variant,p.Leu415Phe,ENST00000282507,;UGT3A2,downstream_gene_variant,,ENST00000504954,;UGT3A2,3_prime_UTR_variant,,ENST00000504685,;	A	ENSG00000168671
UGT3A2	0	.	GRCh37	5	36035965	36035965	+	Silent	SNP	C	C	T	rs138782726	.	COAD		TCGA-AA-3966-01A-01W-1073-09	TCGA-AA-3966-10A-01W-1073-09	C	C	.	.	.	.	.	.	.	.	.	.	.	.	.	.	.	c.1407G>A	p.%3D	p.T469T	ENST00000282507	7/7	78	69	8	44	44	0	UGT3A2,synonymous_variant,p.%3D,ENST00000513300,;UGT3A2,synonymous_variant,p.%3D,ENST00000545528,;UGT3A2,synonymous_variant,p.%3D,ENST00000282507,;UGT3A2,downstream_gene_variant,,ENST00000504954,;UGT3A2,3_prime_UTR_variant,,ENST00000504685,;	T	ENSG00000168671
UGT3A2	0	.	GRCh37	5	36049155	36049155	+	Nonsense_Mutation	SNP	C	C	A	rs149119039	.	COAD		TCGA-AA-3977-01A-01W-0995-10	TCGA-AA-3977-10A-01W-1982-10	C	C	.	.	.	.	.	.	.	.	.	.	.	.	.	.	.	c.679G>T	p.Glu227Ter	p.E227*	ENST00000282507	4/7	117	73	44	500	500	0	UGT3A2,stop_gained,p.Glu193Ter,ENST00000513300,;UGT3A2,stop_gained,p.Glu227Ter,ENST00000282507,;UGT3A2,intron_variant,,ENST00000545528,;UGT3A2,downstream_gene_variant,,ENST00000515131,;UGT3A2,intron_variant,,ENST00000504954,;UGT3A2,intron_variant,,ENST00000504685,;	A	ENSG00000168671
UGT3A2	0	.	GRCh37	5	36049228	36049228	+	Missense_Mutation	SNP	C	C	A	rs748539867	.	COAD		TCGA-AA-3977-01A-01W-0995-10	TCGA-AA-3977-10A-01W-1982-10	C	C	.	.	.	.	.	.	.	.	.	.	.	.	.	.	.	c.606G>T	p.Lys202Asn	p.K202N	ENST00000282507	4/7	95	75	20	357	357	0	UGT3A2,missense_variant,p.Lys168Asn,ENST00000513300,;UGT3A2,missense_variant,p.Lys202Asn,ENST00000282507,;UGT3A2,intron_variant,,ENST00000545528,;UGT3A2,downstream_gene_variant,,ENST00000515131,;UGT3A2,intron_variant,,ENST00000504954,;UGT3A2,intron_variant,,ENST00000504685,;	A	ENSG00000168671
UGT3A2	0	.	GRCh37	5	36066831	36066831	+	Missense_Mutation	SNP	C	C	G	.	.	COAD		TCGA-AA-3982-01A-02W-0995-10	TCGA-AA-3982-10A-01W-0999-10	C	C	.	.	.	.	.	.	.	.	.	.	.	.	.	.	.	c.61G>C	p.Glu21Gln	p.E21Q	ENST00000282507	1/7	129	109	20	71	71	0	UGT3A2,missense_variant,p.Glu21Gln,ENST00000513300,;UGT3A2,missense_variant,p.Glu21Gln,ENST00000515131,;UGT3A2,missense_variant,p.Glu21Gln,ENST00000282507,;UGT3A2,5_prime_UTR_variant,,ENST00000545528,;UGT3A2,intron_variant,,ENST00000504954,;UGT3A2,missense_variant,p.Glu21Gln,ENST00000504685,;	G	ENSG00000168671
UGT3A2	0	.	GRCh37	5	36035971	36035971	+	Silent	SNP	G	G	A	rs367568897	.	COAD		TCGA-AA-3984-01A-02D-1981-10	TCGA-AA-3984-10A-01D-1982-10	G	G	.	.	.	.	.	.	.	.	.	.	.	.	.	.	.	c.1401C>T	p.%3D	p.G467G	ENST00000282507	7/7	217	195	21	262	261	0	UGT3A2,synonymous_variant,p.%3D,ENST00000513300,;UGT3A2,synonymous_variant,p.%3D,ENST00000545528,;UGT3A2,synonymous_variant,p.%3D,ENST00000282507,;UGT3A2,downstream_gene_variant,,ENST00000504954,;UGT3A2,3_prime_UTR_variant,,ENST00000504685,;	A	ENSG00000168671
UGT3A2	0	.	GRCh37	5	36035913	36035913	+	Missense_Mutation	SNP	C	C	T	rs774867868	.	COAD		TCGA-AA-A00N-01A-02D-A17O-10	TCGA-AA-A00N-10A-01D-A17O-10	C	C	.	.	.	.	.	.	.	.	.	.	.	.	.	.	.	c.1459G>A	p.Asp487Asn	p.D487N	ENST00000282507	7/7	419	316	103	102	102	0	UGT3A2,missense_variant,p.Asp453Asn,ENST00000513300,;UGT3A2,missense_variant,p.Asp185Asn,ENST00000545528,;UGT3A2,missense_variant,p.Asp487Asn,ENST00000282507,;UGT3A2,downstream_gene_variant,,ENST00000504954,;UGT3A2,3_prime_UTR_variant,,ENST00000504685,;	T	ENSG00000168671
UGT3A2	0	.	GRCh37	5	36052042	36052042	+	Missense_Mutation	SNP	C	C	A	.	.	COAD		TCGA-CK-5913-01A-11D-1650-10	TCGA-CK-5913-10A-01D-1650-10	C	C	.	.	.	.	.	.	.	.	.	.	.	.	.	.	.	c.241G>T	p.Ala81Ser	p.A81S	ENST00000282507	3/7	335	206	129	362	362	0	UGT3A2,missense_variant,p.Ala47Ser,ENST00000513300,;UGT3A2,missense_variant,p.Ala81Ser,ENST00000515131,;UGT3A2,missense_variant,p.Ala81Ser,ENST00000282507,;UGT3A2,5_prime_UTR_variant,,ENST00000545528,;UGT3A2,non_coding_transcript_exon_variant,,ENST00000504954,;UGT3A2,missense_variant,p.Ala81Ser,ENST00000504685,;	A	ENSG00000168671
UGT3A2	0	.	GRCh37	5	36035845	36035845	+	Missense_Mutation	SNP	C	C	T	.	.	COAD		TCGA-CK-5916-01A-11D-1650-10	TCGA-CK-5916-10A-01D-1650-10	C	C	.	.	.	.	.	.	.	.	.	.	.	.	.	.	.	c.1527G>A	p.Met509Ile	p.M509I	ENST00000282507	7/7	312	222	90	172	172	0	UGT3A2,missense_variant,p.Met475Ile,ENST00000513300,;UGT3A2,missense_variant,p.Met207Ile,ENST00000545528,;UGT3A2,missense_variant,p.Met509Ile,ENST00000282507,;UGT3A2,downstream_gene_variant,,ENST00000504954,;UGT3A2,3_prime_UTR_variant,,ENST00000504685,;	T	ENSG00000168671
UGT3A2	0	.	GRCh37	5	36035969	36035969	+	Missense_Mutation	SNP	G	G	A	rs769005430	.	COAD		TCGA-CM-4743-01A-01D-1719-10	TCGA-CM-4743-10A-01D-1719-10	G	G	.	.	.	.	.	.	.	.	.	.	.	.	.	.	.	c.1403C>T	p.Ala468Val	p.A468V	ENST00000282507	7/7	186	140	45	170	170	0	UGT3A2,missense_variant,p.Ala434Val,ENST00000513300,;UGT3A2,missense_variant,p.Ala166Val,ENST00000545528,;UGT3A2,missense_variant,p.Ala468Val,ENST00000282507,;UGT3A2,downstream_gene_variant,,ENST00000504954,;UGT3A2,3_prime_UTR_variant,,ENST00000504685,;	A	ENSG00000168671
UGT3A2	0	.	GRCh37	5	36048997	36048997	+	Silent	SNP	T	T	G	novel	.	COAD		TCGA-CM-5864-01A-01D-1650-10	TCGA-CM-5864-10A-01D-1650-10	T	T	.	.	.	.	.	.	.	.	.	.	.	.	.	.	.	c.837A>C	p.%3D	p.V279V	ENST00000282507	4/7	311	242	68	150	150	0	UGT3A2,synonymous_variant,p.%3D,ENST00000513300,;UGT3A2,synonymous_variant,p.%3D,ENST00000282507,;UGT3A2,intron_variant,,ENST00000545528,;UGT3A2,downstream_gene_variant,,ENST00000515131,;UGT3A2,intron_variant,,ENST00000504954,;UGT3A2,intron_variant,,ENST00000504685,;	G	ENSG00000168671
UGT3A2	0	.	GRCh37	5	36035970	36035970	+	Missense_Mutation	SNP	C	C	T	rs200458466	.	COAD		TCGA-CM-6674-01A-11D-1835-10	TCGA-CM-6674-10A-01D-1835-10	C	C	.	.	.	.	.	.	.	.	.	.	.	.	.	.	.	c.1402G>A	p.Ala468Thr	p.A468T	ENST00000282507	7/7	134	96	37	177	177	0	UGT3A2,missense_variant,p.Ala434Thr,ENST00000513300,;UGT3A2,missense_variant,p.Ala166Thr,ENST00000545528,;UGT3A2,missense_variant,p.Ala468Thr,ENST00000282507,;UGT3A2,downstream_gene_variant,,ENST00000504954,;UGT3A2,3_prime_UTR_variant,,ENST00000504685,;	T	ENSG00000168671
UGT3A2	0	.	GRCh37	5	36035828	36035828	+	Missense_Mutation	SNP	C	C	T	rs138640717	.	COAD		TCGA-D5-6920-01A-11D-1924-10	TCGA-D5-6920-10A-01D-1924-10	C	C	.	.	.	.	.	.	.	.	.	.	.	.	.	.	.	c.1544G>A	p.Arg515His	p.R515H	ENST00000282507	7/7	185	151	34	305	304	0	UGT3A2,missense_variant,p.Arg481His,ENST00000513300,;UGT3A2,missense_variant,p.Arg213His,ENST00000545528,;UGT3A2,missense_variant,p.Arg515His,ENST00000282507,;UGT3A2,downstream_gene_variant,,ENST00000504954,;UGT3A2,3_prime_UTR_variant,,ENST00000504685,;	T	ENSG00000168671
UGT3A2	0	.	GRCh37	5	36035687	36035687	+	3'UTR	SNP	A	A	C	novel	.	COAD		TCGA-D5-6931-01A-11D-1924-10	TCGA-D5-6931-10A-01D-1924-10	A	A	.	.	.	.	.	.	.	.	.	.	.	.	.	.	.	c.*113T>G	.	.	ENST00000282507	7/7	76	59	17	35	35	0	UGT3A2,3_prime_UTR_variant,,ENST00000513300,;UGT3A2,3_prime_UTR_variant,,ENST00000545528,;UGT3A2,3_prime_UTR_variant,,ENST00000282507,;UGT3A2,downstream_gene_variant,,ENST00000504954,;UGT3A2,3_prime_UTR_variant,,ENST00000504685,;	C	ENSG00000168671
UGT3A2	0	.	GRCh37	5	36049461	36049461	+	Silent	SNP	A	A	G	.	.	COAD		TCGA-F4-6704-01A-11D-1835-10	TCGA-F4-6704-11A-01D-1835-10	A	A	.	.	.	.	.	.	.	.	.	.	.	.	.	.	.	c.373T>C	p.%3D	p.L125L	ENST00000282507	4/7	47	41	6	78	78	0	UGT3A2,synonymous_variant,p.%3D,ENST00000513300,;UGT3A2,synonymous_variant,p.%3D,ENST00000515131,;UGT3A2,synonymous_variant,p.%3D,ENST00000282507,;UGT3A2,intron_variant,,ENST00000545528,;UGT3A2,intron_variant,,ENST00000504954,;UGT3A2,intron_variant,,ENST00000504685,;	G	ENSG00000168671
UGT3A2	0	.	GRCh37	5	36035763	36035763	+	3'UTR	SNP	G	G	A	rs778702823	.	COAD		TCGA-G4-6298-01A-11D-1719-10	TCGA-G4-6298-10A-01D-1719-10	G	G	.	.	.	.	.	.	.	.	.	.	.	.	.	.	.	c.*37C>T	.	.	ENST00000282507	7/7	120	45	74	39	39	0	UGT3A2,3_prime_UTR_variant,,ENST00000513300,;UGT3A2,3_prime_UTR_variant,,ENST00000545528,;UGT3A2,3_prime_UTR_variant,,ENST00000282507,;UGT3A2,downstream_gene_variant,,ENST00000504954,;UGT3A2,3_prime_UTR_variant,,ENST00000504685,;	A	ENSG00000168671
UGT3A2	0	.	GRCh37	5	36066805	36066805	+	Silent	SNP	A	A	G	rs757449326	.	COAD		TCGA-G4-6304-01A-11D-1924-10	TCGA-G4-6304-10A-01D-1924-10	A	A	.	.	.	.	.	.	.	.	.	.	.	.	.	.	.	c.87T>C	p.%3D	p.S29S	ENST00000282507	1/7	214	179	34	76	76	0	UGT3A2,synonymous_variant,p.%3D,ENST00000513300,;UGT3A2,synonymous_variant,p.%3D,ENST00000515131,;UGT3A2,synonymous_variant,p.%3D,ENST00000282507,;UGT3A2,5_prime_UTR_variant,,ENST00000545528,;UGT3A2,intron_variant,,ENST00000504954,;UGT3A2,synonymous_variant,p.%3D,ENST00000504685,;	G	ENSG00000168671
UGT3A2	0	.	GRCh37	5	36035807	36035807	+	Missense_Mutation	SNP	T	T	G	.	.	COAD		TCGA-G4-6586-01A-11D-1771-10	TCGA-G4-6586-10A-01D-1771-10	T	T	.	.	.	.	.	.	.	.	.	.	.	.	.	.	.	c.1565A>C	p.Glu522Ala	p.E522A	ENST00000282507	7/7	298	196	102	411	411	0	UGT3A2,missense_variant,p.Glu488Ala,ENST00000513300,;UGT3A2,missense_variant,p.Glu220Ala,ENST00000545528,;UGT3A2,missense_variant,p.Glu522Ala,ENST00000282507,;UGT3A2,downstream_gene_variant,,ENST00000504954,;UGT3A2,3_prime_UTR_variant,,ENST00000504685,;	G	ENSG00000168671
UGT3A2	0	.	GRCh37	5	36035616	36035616	+	3'UTR	SNP	T	T	G	novel	.	COAD		TCGA-RU-A8FL-01A-11D-A36X-10	TCGA-RU-A8FL-10A-01D-A370-10	T	T	.	.	.	.	.	.	.	.	.	.	.	.	.	.	.	c.*184A>C	.	.	ENST00000282507	7/7	28	16	12	37	36	0	UGT3A2,3_prime_UTR_variant,,ENST00000513300,;UGT3A2,3_prime_UTR_variant,,ENST00000545528,;UGT3A2,3_prime_UTR_variant,,ENST00000282507,;UGT3A2,downstream_gene_variant,,ENST00000504954,;UGT3A2,3_prime_UTR_variant,,ENST00000504685,;	G	ENSG00000168671
UGT8	0	.	GRCh37	4	115597096	115597096	+	Silent	SNP	T	T	C	.	.	COAD		TCGA-A6-5661-01A-01D-1650-10	TCGA-A6-5661-10A-01D-1650-10	T	T	.	.	.	.	.	.	.	.	.	.	.	.	.	.	.	c.1278T>C	p.%3D	p.A426A	ENST00000310836	6/6	174	120	54	172	172	0	UGT8,synonymous_variant,p.%3D,ENST00000310836,;UGT8,synonymous_variant,p.%3D,ENST00000394511,;	C	ENSG00000174607
UGT8	0	.	GRCh37	4	115597233	115597234	+	Frame_Shift_Ins	INS	-	-	T	.	.	COAD		TCGA-A6-5665-01A-01D-1650-10	TCGA-A6-5665-11A-01D-1650-10	-	-	.	.	.	.	.	.	.	.	.	.	.	.	.	.	.	c.1421dupT	p.Leu474PhefsTer36	p.L474Ffs*36	ENST00000310836	6/6	983	699	284	637	637	0	UGT8,frameshift_variant,p.Leu474PhefsTer36,ENST00000310836,;UGT8,frameshift_variant,p.Leu474PhefsTer36,ENST00000394511,;	T	ENSG00000174607
UGT8	0	.	GRCh37	4	115597133	115597133	+	Missense_Mutation	SNP	C	C	T	rs767674399	.	COAD		TCGA-AA-3693-01A-01W-0900-09	TCGA-AA-3693-10A-01W-0900-09	C	C	.	.	.	.	.	.	.	.	.	.	.	.	.	.	.	c.1315C>T	p.His439Tyr	p.H439Y	ENST00000310836	6/6	248	176	72	226	226	0	UGT8,missense_variant,p.His439Tyr,ENST00000310836,;UGT8,missense_variant,p.His439Tyr,ENST00000394511,;	T	ENSG00000174607
UGT8	0	.	GRCh37	4	115544601	115544601	+	Missense_Mutation	SNP	A	A	G	.	.	COAD		TCGA-AA-3864-01A-01D-1981-10	TCGA-AA-3864-10A-01W-0995-10	A	A	.	.	.	.	.	.	.	.	.	.	.	.	.	.	.	c.565A>G	p.Asn189Asp	p.N189D	ENST00000310836	2/6	384	247	137	265	265	0	UGT8,missense_variant,p.Asn189Asp,ENST00000310836,;UGT8,missense_variant,p.Asn189Asp,ENST00000394511,;UGT8,downstream_gene_variant,,ENST00000507710,;	G	ENSG00000174607
UGT8	0	.	GRCh37	4	115544772	115544772	+	Missense_Mutation	SNP	G	G	A	rs760771718	.	COAD		TCGA-AA-3966-01A-01W-1073-09	TCGA-AA-3966-10A-01W-1073-09	G	G	.	.	.	.	.	.	.	.	.	.	.	.	.	.	.	c.736G>A	p.Val246Ile	p.V246I	ENST00000310836	2/6	83	44	38	85	85	0	UGT8,missense_variant,p.Val246Ile,ENST00000310836,;UGT8,missense_variant,p.Val246Ile,ENST00000394511,;UGT8,downstream_gene_variant,,ENST00000507710,;	A	ENSG00000174607
UGT8	0	.	GRCh37	4	115586857	115586857	+	Missense_Mutation	SNP	G	G	T	.	.	COAD		TCGA-AA-3977-01A-01W-0995-10	TCGA-AA-3977-10A-01W-1982-10	G	G	.	.	.	.	.	.	.	.	.	.	.	.	.	.	.	c.987G>T	p.Lys329Asn	p.K329N	ENST00000310836	4/6	335	259	75	430	430	0	UGT8,missense_variant,p.Lys329Asn,ENST00000310836,;UGT8,missense_variant,p.Lys329Asn,ENST00000394511,;	T	ENSG00000174607
UGT8	0	.	GRCh37	4	115544340	115544340	+	Missense_Mutation	SNP	G	G	A	.	.	COAD		TCGA-AA-3984-01A-02D-1981-10	TCGA-AA-3984-10A-01D-1982-10	G	G	.	.	.	.	.	.	.	.	.	.	.	.	.	.	.	c.304G>A	p.Glu102Lys	p.E102K	ENST00000310836	2/6	189	151	37	214	214	0	UGT8,missense_variant,p.Glu102Lys,ENST00000507710,;UGT8,missense_variant,p.Glu102Lys,ENST00000310836,;UGT8,missense_variant,p.Glu102Lys,ENST00000394511,;	A	ENSG00000174607
UGT8	0	.	GRCh37	4	115597432	115597432	+	Missense_Mutation	SNP	G	G	T	novel	.	COAD		TCGA-AA-3984-01A-02D-1981-10	TCGA-AA-3984-10A-01D-1982-10	G	G	.	.	.	.	.	.	.	.	.	.	.	.	.	.	.	c.1614G>T	p.Lys538Asn	p.K538N	ENST00000310836	6/6	76	65	11	113	113	0	UGT8,missense_variant,p.Lys538Asn,ENST00000310836,;UGT8,missense_variant,p.Lys538Asn,ENST00000394511,;	T	ENSG00000174607
UGT8	0	.	GRCh37	4	115597464	115597464	+	3'UTR	SNP	G	G	T	rs372484108	.	COAD		TCGA-AA-3984-01A-02D-1981-10	TCGA-AA-3984-10A-01D-1982-10	G	G	.	.	.	.	.	.	.	.	.	.	.	.	.	.	.	c.*20G>T	.	.	ENST00000310836	6/6	48	40	8	70	70	0	UGT8,3_prime_UTR_variant,,ENST00000310836,;UGT8,3_prime_UTR_variant,,ENST00000394511,;	T	ENSG00000174607
UGT8	0	.	GRCh37	4	115585217	115585217	+	Missense_Mutation	SNP	G	G	A	novel	.	COAD		TCGA-AD-6895-01A-11D-1924-10	TCGA-AD-6895-10A-01D-1924-10	G	G	.	.	.	.	.	.	.	.	.	.	.	.	.	.	.	c.889G>A	p.Val297Ile	p.V297I	ENST00000310836	3/6	126	82	44	232	231	0	UGT8,missense_variant,p.Val297Ile,ENST00000310836,;UGT8,missense_variant,p.Val297Ile,ENST00000394511,;	A	ENSG00000174607
UGT8	0	.	GRCh37	4	115544637	115544637	+	Missense_Mutation	SNP	C	C	A	rs769419385	.	COAD		TCGA-AZ-6598-01A-11D-1771-10	TCGA-AZ-6598-11A-01D-1771-10	C	C	.	.	.	.	.	.	.	.	.	.	.	.	.	.	.	c.601C>A	p.Leu201Ile	p.L201I	ENST00000310836	2/6	228	145	82	216	216	0	UGT8,missense_variant,p.Leu201Ile,ENST00000310836,;UGT8,missense_variant,p.Leu201Ile,ENST00000394511,;UGT8,downstream_gene_variant,,ENST00000507710,;	A	ENSG00000174607
UGT8	0	.	GRCh37	4	115597356	115597356	+	Missense_Mutation	SNP	G	G	A	rs572629718	.	COAD		TCGA-D5-6530-01A-11D-1719-10	TCGA-D5-6530-10A-01D-1719-10	G	G	.	.	.	.	.	.	.	.	.	.	.	.	.	.	.	c.1538G>A	p.Ser513Asn	p.S513N	ENST00000310836	6/6	363	234	128	86	86	0	UGT8,missense_variant,p.Ser513Asn,ENST00000310836,;UGT8,missense_variant,p.Ser513Asn,ENST00000394511,;	A	ENSG00000174607
UGT8	0	.	GRCh37	4	115544476	115544476	+	Missense_Mutation	SNP	T	T	C	.	.	COAD		TCGA-D5-6927-01A-21D-1924-10	TCGA-D5-6927-10A-01D-1924-10	T	T	.	.	.	.	.	.	.	.	.	.	.	.	.	.	.	c.440T>C	p.Ile147Thr	p.I147T	ENST00000310836	2/6	448	352	96	368	368	0	UGT8,missense_variant,p.Ile147Thr,ENST00000310836,;UGT8,missense_variant,p.Ile147Thr,ENST00000394511,;UGT8,downstream_gene_variant,,ENST00000507710,;	C	ENSG00000174607
UGT8	0	.	GRCh37	4	115544588	115544589	+	Frame_Shift_Del	DEL	CA	CA	-	.	.	COAD		TCGA-G4-6628-01A-11D-1835-10	TCGA-G4-6628-10A-01D-1835-10	CA	CA	.	.	.	.	.	.	.	.	.	.	.	.	.	.	.	c.554_555delCA	p.Thr185ArgfsTer31	p.T185Rfs*31	ENST00000310836	2/6	231	185	46	140	140	0	UGT8,frameshift_variant,p.Thr185ArgfsTer31,ENST00000310836,;UGT8,frameshift_variant,p.Thr185ArgfsTer31,ENST00000394511,;UGT8,downstream_gene_variant,,ENST00000507710,;	-	ENSG00000174607
[truncated: 66 more columns]

## Sheet: DLBC
Hugo_Symbol	Entrez_Gene_Id	Center	NCBI_Build	Chromosome	Start_Position	End_Position	Strand	Variant_Classification	Variant_Type	Reference_Allele	Tumor_Seq_Allele1	Tumor_Seq_Allele2	dbSNP_RS	dbSNP_Val_Status	TCGA Cancer type		Tumor_Sample_Barcode	Matched_Norm_Sample_Barcode	Match_Norm_Seq_Allele1	Match_Norm_Seq_Allele2	Tumor_Validation_Allele1	Tumor_Validation_Allele2	Match_Norm_Validation_Allele1	Match_Norm_Validation_Allele2	Verification_Status	Validation_Status	Mutation_Status	Sequencing_Phase	Sequence_Source	Validation_Method	Score	BAM_File	Sequencer	Tumor_Sample_UUID	Matched_Norm_Sample_UUID	HGVSc	HGVSp	HGVSp_Short	Transcript_ID	Exon_Number	t_depth	t_ref_count	t_alt_count	n_depth	n_ref_count	n_alt_count	all_effects	Allele	Gene
UGT1A3	0	.	GRCh37	2	234638243	234638243	+	Silent	SNP	C	C	T	rs375083511	.	DLBC		TCGA-FF-8042-01A-11D-2210-10	TCGA-FF-8042-10A-01D-2210-10	C	C	.	.	.	.	.	.	.	.	.	.	.	.	.	.	.	c.471C>T	p.%3D	p.C157C	ENST00000482026	1/5	237	142	94	268	267	0	UGT1A3,synonymous_variant,p.%3D,ENST00000482026,;UGT1A8,synonymous_variant,p.%3D,ENST00000609767,;UGT1A10,intron_variant,,ENST00000373445,;UGT1A4,intron_variant,,ENST00000373409,;UGT1A6,intron_variant,,ENST00000305139,;UGT1A6,intron_variant,,ENST00000373424,;UGT1A8,intron_variant,,ENST00000608381,;UGT1A7,intron_variant,,ENST00000373426,;UGT1A8,intron_variant,,ENST00000609637,;UGT1A5,intron_varian…	T	ENSG00000243135
UGT2A1	0	.	GRCh37	4	70461965	70461965	+	Intron	SNP	G	G	A	novel	.	DLBC		TCGA-FF-A7CQ-01A-11D-A382-10	TCGA-FF-A7CQ-10A-01D-A385-10	G	G	.	.	.	.	.	.	.	.	.	.	.	.	.	.	.	c.996+3C>T	.	.	ENST00000503640	.	110	79	30	121	121	0	UGT2A1,splice_region_variant,,ENST00000503640,;UGT2A2,splice_region_variant,,ENST00000457664,;UGT2A2,splice_region_variant,,ENST00000604629,;UGT2A1,intron_variant,,ENST00000286604,;UGT2A1,intron_variant,,ENST00000514019,;UGT2A2,intron_variant,,ENST00000604021,;UGT2A1,intron_variant,,ENST00000512704,;UGT2A1,intron_variant,,ENST00000502343,;UGT2A1,downstream_gene_variant,,ENST00000514341,;	A	ENSG00000173610
UGT2B17	0	.	GRCh37	4	69433904	69433904	+	Missense_Mutation	SNP	C	C	T	novel	.	DLBC		TCGA-FF-A7CR-01A-11D-A382-10	TCGA-FF-A7CR-10A-01D-A385-10	C	C	.	.	.	.	.	.	.	.	.	.	.	.	.	.	.	c.299G>A	p.Ser100Asn	p.S100N	ENST00000317746	1/6	352	269	83	296	296	0	UGT2B17,missense_variant,p.Ser100Asn,ENST00000317746,;	T	ENSG00000197888
UGT2B7	0	.	GRCh37	4	69978319	69978319	+	Nonsense_Mutation	SNP	G	G	A	novel	.	DLBC		TCGA-FF-A7CW-01A-11D-A382-10	TCGA-FF-A7CW-10A-01D-A385-10	G	G	.	.	.	.	.	.	.	.	.	.	.	.	.	.	.	c.1455G>A	p.Trp485Ter	p.W485*	ENST00000305231	6/6	104	71	33	131	131	0	UGT2B7,stop_gained,p.Trp485Ter,ENST00000305231,;UGT2B7,3_prime_UTR_variant,,ENST00000508661,;UGT2B7,downstream_gene_variant,,ENST00000502942,;UGT2B7,downstream_gene_variant,,ENST00000509763,;	A	ENSG00000171234
UGT2B7	0	.	GRCh37	4	69962771	69962771	+	Missense_Mutation	SNP	A	A	G	novel	.	DLBC		TCGA-VB-A8QN-01A-11D-A382-10	TCGA-VB-A8QN-10A-01D-A385-10	A	A	.	.	.	.	.	.	.	.	.	.	.	.	.	.	.	c.533A>G	p.Tyr178Cys	p.Y178C	ENST00000305231	1/6	189	145	44	157	157	0	UGT2B7,missense_variant,p.Tyr178Cys,ENST00000305231,;UGT2B7,missense_variant,p.Tyr178Cys,ENST00000508661,;UGT2B7,intron_variant,,ENST00000502942,;UGT2B7,intron_variant,,ENST00000509763,;	G	ENSG00000171234
[truncated: 66 more columns]

## Sheet: ESCA
Hugo_Symbol	Entrez_Gene_Id	Center	NCBI_Build	Chromosome	Start_Position	End_Position	Strand	Variant_Classification	Variant_Type	Reference_Allele	Tumor_Seq_Allele1	Tumor_Seq_Allele2	dbSNP_RS	dbSNP_Val_Status	TCGA Cancer type		Tumor_Sample_Barcode	Matched_Norm_Sample_Barcode	Match_Norm_Seq_Allele1	Match_Norm_Seq_Allele2	Tumor_Validation_Allele1	Tumor_Validation_Allele2	Match_Norm_Validation_Allele1	Match_Norm_Validation_Allele2	Verification_Status	Validation_Status	Mutation_Status	Sequencing_Phase	Sequence_Source	Validation_Method	Score	BAM_File	Sequencer	Tumor_Sample_UUID	Matched_Norm_Sample_UUID	HGVSc	HGVSp	HGVSp_Short	Transcript_ID	Exon_Number	t_depth	t_ref_count	t_alt_count	n_depth	n_ref_count	n_alt_count	all_effects	Allele	Gene
UGT1A10	0	.	GRCh37	2	234545575	234545575	+	Missense_Mutation	SNP	A	A	G	rs770761874	.	ESCA		TCGA-R6-A6XG-01B-11D-A33E-09	TCGA-R6-A6XG-10A-01D-A33H-09	A	A	.	.	.	.	.	.	.	.	.	.	.	.	.	.	.	c.407A>G	p.Tyr136Cys	p.Y136C	ENST00000344644	1/5	106	97	9	49	49	0	UGT1A10,missense_variant,p.Tyr136Cys,ENST00000373445,;UGT1A10,missense_variant,p.Tyr136Cys,ENST00000344644,;UGT1A8,intron_variant,,ENST00000373450,;	G	ENSG00000242515
UGT1A3	0	.	GRCh37	2	234638231	234638231	+	Silent	SNP	C	C	T	.	.	ESCA		TCGA-VR-AA4D-01A-11D-A37C-09	TCGA-VR-AA4D-10A-01D-A37F-09	C	C	.	.	.	.	.	.	.	.	.	.	.	.	.	.	.	c.459C>T	p.%3D	p.P153P	ENST00000482026	1/5	84	65	18	76	76	0	UGT1A3,synonymous_variant,p.%3D,ENST00000482026,;UGT1A8,synonymous_variant,p.%3D,ENST00000609767,;UGT1A10,intron_variant,,ENST00000373445,;UGT1A4,intron_variant,,ENST00000373409,;UGT1A6,intron_variant,,ENST00000305139,;UGT1A6,intron_variant,,ENST00000373424,;UGT1A8,intron_variant,,ENST00000608381,;UGT1A7,intron_variant,,ENST00000373426,;UGT1A8,intron_variant,,ENST00000609637,;UGT1A5,intron_varian…	T	ENSG00000243135
UGT1A4	0	.	GRCh37	2	234627801	234627801	+	Missense_Mutation	SNP	G	G	C	novel	.	ESCA		TCGA-2H-A9GH-01A-11D-A37C-09	TCGA-2H-A9GH-11A-11D-A37F-09	G	G	.	.	.	.	.	.	.	.	.	.	.	.	.	.	.	c.335G>C	p.Arg112Thr	p.R112T	ENST00000373409	1/5	46	37	8	53	53	0	UGT1A4,missense_variant,p.Arg112Thr,ENST00000373409,;UGT1A10,intron_variant,,ENST00000373445,;UGT1A6,intron_variant,,ENST00000305139,;UGT1A6,intron_variant,,ENST00000373424,;UGT1A8,intron_variant,,ENST00000608381,;UGT1A7,intron_variant,,ENST00000373426,;UGT1A8,intron_variant,,ENST00000609637,;UGT1A5,intron_variant,,ENST00000373414,;UGT1A6,intron_variant,,ENST00000406651,;UGT1A10,intron_variant,,E…	C	ENSG00000244474
UGT1A4	0	.	GRCh37	2	234628062	234628062	+	Missense_Mutation	SNP	C	C	T	rs538242607	.	ESCA		TCGA-R6-A6L6-01B-11D-A33E-09	TCGA-R6-A6L6-10A-01D-A33H-09	C	C	.	.	.	.	.	.	.	.	.	.	.	.	.	.	.	c.596C>T	p.Thr199Met	p.T199M	ENST00000373409	1/5	109	86	22	113	113	0	UGT1A4,missense_variant,p.Thr199Met,ENST00000373409,;UGT1A10,intron_variant,,ENST00000373445,;UGT1A6,intron_variant,,ENST00000305139,;UGT1A6,intron_variant,,ENST00000373424,;UGT1A8,intron_variant,,ENST00000608381,;UGT1A7,intron_variant,,ENST00000373426,;UGT1A8,intron_variant,,ENST00000609637,;UGT1A5,intron_variant,,ENST00000373414,;UGT1A6,intron_variant,,ENST00000406651,;UGT1A10,intron_variant,,E…	T	ENSG00000244474
UGT1A5	0	.	GRCh37	2	234622057	234622057	+	Silent	SNP	C	C	T	novel	.	ESCA		TCGA-2H-A9GR-01A-12D-A37C-09	TCGA-2H-A9GR-11A-11D-A37F-09	C	C	.	.	.	.	.	.	.	.	.	.	.	.	.	.	.	c.420C>T	p.%3D	p.H140H	ENST00000373414	1/5	91	80	11	88	88	0	UGT1A8,synonymous_variant,p.%3D,ENST00000608381,;UGT1A5,synonymous_variant,p.%3D,ENST00000373414,;UGT1A10,intron_variant,,ENST00000373445,;UGT1A6,intron_variant,,ENST00000305139,;UGT1A6,intron_variant,,ENST00000373424,;UGT1A7,intron_variant,,ENST00000373426,;UGT1A8,intron_variant,,ENST00000609637,;UGT1A6,intron_variant,,ENST00000406651,;UGT1A10,intron_variant,,ENST00000344644,;UGT1A8,intron_varia…	T	ENSG00000240224
UGT1A5	0	.	GRCh37	2	234622316	234622316	+	Missense_Mutation	SNP	G	G	T	rs200994534	.	ESCA		TCGA-V5-AASV-01A-11D-A387-09	TCGA-V5-AASV-10A-01D-A38A-09	G	G	.	.	.	.	.	.	.	.	.	.	.	.	.	.	.	c.679G>T	p.Val227Phe	p.V227F	ENST00000373414	1/5	179	78	100	134	134	0	UGT1A8,missense_variant,p.Val227Phe,ENST00000608381,;UGT1A5,missense_variant,p.Val227Phe,ENST00000373414,;UGT1A10,intron_variant,,ENST00000373445,;UGT1A6,intron_variant,,ENST00000305139,;UGT1A6,intron_variant,,ENST00000373424,;UGT1A7,intron_variant,,ENST00000373426,;UGT1A8,intron_variant,,ENST00000609637,;UGT1A6,intron_variant,,ENST00000406651,;UGT1A10,intron_variant,,ENST00000344644,;UGT1A8,intr…	T	ENSG00000240224
UGT1A6	0	.	GRCh37	2	234601834	234601834	+	Missense_Mutation	SNP	G	G	A	novel	.	ESCA		TCGA-2H-A9GQ-01A-11D-A37C-09	TCGA-2H-A9GQ-11A-11D-A37F-09	G	G	.	.	.	.	.	.	.	.	.	.	.	.	.	.	.	c.184G>A	p.Glu62Lys	p.E62K	ENST00000305139	1/5	54	41	13	50	50	0	UGT1A6,missense_variant,p.Glu62Lys,ENST00000441351,;UGT1A6,missense_variant,p.Glu62Lys,ENST00000305139,;UGT1A10,intron_variant,,ENST00000373445,;UGT1A6,intron_variant,,ENST00000373424,;UGT1A7,intron_variant,,ENST00000373426,;UGT1A8,intron_variant,,ENST00000609637,;UGT1A10,intron_variant,,ENST00000344644,;UGT1A8,intron_variant,,ENST00000373450,;UGT1A9,intron_variant,,ENST00000354728,;UGT1A7,downst…	A	ENSG00000167165
UGT1A6	0	.	GRCh37	2	234602073	234602073	+	Missense_Mutation	SNP	G	G	C	novel	.	ESCA		TCGA-LN-A49S-01A-11D-A247-09	TCGA-LN-A49S-10A-01D-A247-09	G	G	.	.	.	.	.	.	.	.	.	.	.	.	.	.	.	c.423G>C	p.Glu141Asp	p.E141D	ENST00000305139	1/5	44	33	11	61	61	0	UGT1A6,missense_variant,p.Glu141Asp,ENST00000441351,;UGT1A6,missense_variant,p.Glu141Asp,ENST00000305139,;UGT1A10,intron_variant,,ENST00000373445,;UGT1A6,intron_variant,,ENST00000373424,;UGT1A7,intron_variant,,ENST00000373426,;UGT1A8,intron_variant,,ENST00000609637,;UGT1A10,intron_variant,,ENST00000344644,;UGT1A8,intron_variant,,ENST00000373450,;UGT1A9,intron_variant,,ENST00000354728,;UGT1A7,down…	C	ENSG00000167165
UGT1A7	0	.	GRCh37	2	234591302	234591302	+	Missense_Mutation	SNP	C	C	T	rs371311391	.	ESCA		TCGA-XP-A8T7-01A-11D-A36J-09	TCGA-XP-A8T7-10A-01D-A36M-09	C	C	.	.	.	.	.	.	.	.	.	.	.	.	.	.	.	c.719C>T	p.Thr240Met	p.T240M	ENST00000373426	1/5	84	59	25	51	51	0	UGT1A7,missense_variant,p.Thr240Met,ENST00000373426,;UGT1A7,missense_variant,p.Thr97Met,ENST00000485022,;UGT1A10,intron_variant,,ENST00000373445,;UGT1A10,intron_variant,,ENST00000344644,;UGT1A8,intron_variant,,ENST00000373450,;UGT1A8,intron_variant,,ENST00000609637,;UGT1A9,intron_variant,,ENST00000354728,;	T	ENSG00000244122
UGT1A9	0	.	GRCh37	2	234581373	234581373	+	Missense_Mutation	SNP	G	G	A	rs142414435	.	ESCA		TCGA-V5-AASX-01A-11D-A387-09	TCGA-V5-AASX-10A-01D-A38A-09	G	G	.	.	.	.	.	.	.	.	.	.	.	.	.	.	.	c.793G>A	p.Val265Met	p.V265M	ENST00000354728	1/5	61	55	5	62	61	0	UGT1A8,missense_variant,p.Val265Met,ENST00000609637,;UGT1A9,missense_variant,p.Val265Met,ENST00000354728,;UGT1A10,intron_variant,,ENST00000373445,;UGT1A10,intron_variant,,ENST00000344644,;UGT1A8,intron_variant,,ENST00000373450,;	A	ENSG00000241119
UGT2A1	0	.	GRCh37	4	70461989	70461989	+	Silent	SNP	G	G	T	rs149416008	.	ESCA		TCGA-LN-A49Y-01A-11D-A27G-09	TCGA-LN-A49Y-10A-01D-A27G-09	G	G	.	.	.	.	.	.	.	.	.	.	.	.	.	.	.	c.975C>A	p.%3D	p.A325A	ENST00000503640	3/6	45	23	21	51	51	0	UGT2A1,synonymous_variant,p.%3D,ENST00000503640,;UGT2A2,synonymous_variant,p.%3D,ENST00000457664,;UGT2A2,synonymous_variant,p.%3D,ENST00000604629,;UGT2A1,intron_variant,,ENST00000286604,;UGT2A1,intron_variant,,ENST00000514019,;UGT2A2,intron_variant,,ENST00000604021,;UGT2A1,intron_variant,,ENST00000512704,;UGT2A1,intron_variant,,ENST00000502343,;UGT2A1,downstream_gene_variant,,ENST00000514341,;	T	ENSG00000173610
UGT2B10	0	.	GRCh37	4	69696698	69696698	+	3'UTR	DEL	A	A	-	rs74464983	.	ESCA		TCGA-L5-A43J-01A-12D-A247-09	TCGA-L5-A43J-11A-11D-A247-09	A	A	.	.	.	.	.	.	.	.	.	.	.	.	.	.	.	c.*109delA	.	.	ENST00000265403	6/6	23	10	13	20	20	0	UGT2B10,3_prime_UTR_variant,,ENST00000265403,;UGT2B10,downstream_gene_variant,,ENST00000458688,;RP11-468N14.3,downstream_gene_variant,,ENST00000512503,;	-	ENSG00000109181
UGT2B11	0	.	GRCh37	4	70080365	70080365	+	Missense_Mutation	SNP	C	C	A	novel	.	ESCA		TCGA-L5-A4OJ-01A-11D-A27G-09	TCGA-L5-A4OJ-11A-12D-A27G-09	C	C	.	.	.	.	.	.	.	.	.	.	.	.	.	.	.	c.76G>T	p.Val26Leu	p.V26L	ENST00000446444	1/6	100	66	34	105	105	0	UGT2B11,missense_variant,p.Val26Leu,ENST00000446444,;RP11-704M14.1,non_coding_transcript_exon_variant,,ENST00000505646,;RP11-704M14.1,downstream_gene_variant,,ENST00000504301,;RP11-704M14.2,downstream_gene_variant,,ENST00000514003,;	A	ENSG00000213759
UGT2B15	0	.	GRCh37	4	69536007	69536007	+	Missense_Mutation	SNP	A	A	T	novel	.	ESCA		TCGA-JY-A93E-01A-11D-A37C-09	TCGA-JY-A93E-10A-01D-A37F-09	A	A	.	.	.	.	.	.	.	.	.	.	.	.	.	.	.	c.330T>A	p.Phe110Leu	p.F110L	ENST00000338206	1/6	42	35	7	41	41	0	UGT2B15,missense_variant,p.Phe110Leu,ENST00000338206,;	T	ENSG00000196620
UGT2B15	0	.	GRCh37	4	69513073	69513073	+	Missense_Mutation	SNP	T	T	C	novel	.	ESCA		TCGA-L5-A88T-01A-11D-A351-09	TCGA-L5-A88T-11A-11D-A351-09	T	T	.	.	.	.	.	.	.	.	.	.	.	.	.	.	.	c.1342A>G	p.Arg448Gly	p.R448G	ENST00000338206	6/6	159	150	8	151	151	0	UGT2B15,missense_variant,p.Arg448Gly,ENST00000338206,;	C	ENSG00000196620
UGT2B15	0	.	GRCh37	4	69535727	69535727	+	Missense_Mutation	SNP	C	C	T	novel	.	ESCA		TCGA-LN-A49Y-01A-11D-A27G-09	TCGA-LN-A49Y-10A-01D-A27G-09	C	C	.	.	.	.	.	.	.	.	.	.	.	.	.	.	.	c.610G>A	p.Asp204Asn	p.D204N	ENST00000338206	1/6	89	59	30	68	68	0	UGT2B15,missense_variant,p.Asp204Asn,ENST00000338206,;	T	ENSG00000196620
UGT2B17	0	.	GRCh37	4	69403558	69403558	+	Nonsense_Mutation	SNP	G	G	A	rs267600213	.	ESCA		TCGA-Z6-A9VB-01A-21D-A37C-09	TCGA-Z6-A9VB-10A-01D-A37F-09	G	G	.	.	.	.	.	.	.	.	.	.	.	.	.	.	.	c.1378C>T	p.Arg460Ter	p.R460*	ENST00000317746	6/6	37	11	26	67	67	0	UGT2B17,stop_gained,p.Arg460Ter,ENST00000317746,;	A	ENSG00000197888
UGT2B28	0	.	GRCh37	4	70156482	70156482	+	Silent	SNP	G	G	C	rs751057671	.	ESCA		TCGA-L5-A8NF-01A-11D-A37C-09	TCGA-L5-A8NF-11A-11D-A37F-09	G	G	.	.	.	.	.	.	.	.	.	.	.	.	.	.	.	c.1263G>C	p.%3D	p.S421S	ENST00000335568	5/6	119	89	30	160	160	0	UGT2B28,synonymous_variant,p.%3D,ENST00000335568,;UGT2B28,intron_variant,,ENST00000511240,;	C	ENSG00000135226
UGT2B4	0	.	GRCh37	4	70361097	70361097	+	Silent	SNP	G	G	A	rs777267648	.	ESCA		TCGA-2H-A9GF-01A-11D-A37C-09	TCGA-2H-A9GF-11A-11D-A37F-09	G	G	.	.	.	.	.	.	.	.	.	.	.	.	.	.	.	c.483C>T	p.%3D	p.A161A	ENST00000305107	1/6	34	22	12	59	59	0	UGT2B4,synonymous_variant,p.%3D,ENST00000305107,;UGT2B4,synonymous_variant,p.%3D,ENST00000512583,;UGT2B4,synonymous_variant,p.%3D,ENST00000381096,;UGT2B4,downstream_gene_variant,,ENST00000510114,;UGT2B4,non_coding_transcript_exon_variant,,ENST00000502655,;UGT2B4,intron_variant,,ENST00000506580,;UGT2B4,intron_variant,,ENST00000503836,;	A	ENSG00000156096
UGT2B4	0	.	GRCh37	4	70351133	70351133	+	Missense_Mutation	SNP	G	G	T	novel	.	ESCA		TCGA-LN-A7HY-01A-12D-A351-09	TCGA-LN-A7HY-10A-01D-A351-09	G	G	.	.	.	.	.	.	.	.	.	.	.	.	.	.	.	c.1103C>A	p.Thr368Asn	p.T368N	ENST00000305107	5/6	153	142	10	147	147	0	UGT2B4,missense_variant,p.Thr368Asn,ENST00000305107,;UGT2B4,missense_variant,p.Thr232Asn,ENST00000381096,;UGT2B4,intron_variant,,ENST00000512583,;UGT2B4,non_coding_transcript_exon_variant,,ENST00000502655,;UGT2B4,intron_variant,,ENST00000506580,;UGT2B4,downstream_gene_variant,,ENST00000503836,;	T	ENSG00000156096
UGT2B7	0	.	GRCh37	4	69978560	69978560	+	3'UTR	SNP	A	A	G	novel	.	ESCA		TCGA-V5-AASW-01A-11D-A403-09	TCGA-V5-AASW-10A-01D-A403-09	A	A	.	.	.	.	.	.	.	.	.	.	.	.	.	.	.	c.*106A>G	.	.	ENST00000305231	6/6	20	16	4	29	29	0	UGT2B7,3_prime_UTR_variant,,ENST00000305231,;UGT2B7,3_prime_UTR_variant,,ENST00000508661,;UGT2B7,downstream_gene_variant,,ENST00000502942,;UGT2B7,downstream_gene_variant,,ENST00000509763,;	G	ENSG00000171234
UGT3A1	0	.	GRCh37	5	35957435	35957435	+	Silent	SNP	C	C	T	novel	.	ESCA		TCGA-JY-A93D-01A-11D-A387-09	TCGA-JY-A93D-10A-01D-A38A-09	C	C	.	.	.	.	.	.	.	.	.	.	.	.	.	.	.	c.930G>A	p.%3D	p.Q310Q	ENST00000274278	5/7	87	64	23	82	82	0	UGT3A1,synonymous_variant,p.%3D,ENST00000274278,;UGT3A1,synonymous_variant,p.%3D,ENST00000507113,;UGT3A1,synonymous_variant,p.%3D,ENST00000503189,;UGT3A1,downstream_gene_variant,,ENST00000333811,;UGT3A1,non_coding_transcript_exon_variant,,ENST00000513233,;UGT3A1,3_prime_UTR_variant,,ENST00000515801,;	T	ENSG00000145626
UGT3A1	0	.	GRCh37	5	35954308	35954308	+	Missense_Mutation	SNP	G	G	A	novel	.	ESCA		TCGA-R6-A6DQ-01B-11D-A31U-09	TCGA-R6-A6DQ-10A-01D-A31U-09	G	G	.	.	.	.	.	.	.	.	.	.	.	.	.	.	.	c.1568C>T	p.Thr523Ile	p.T523I	ENST00000274278	7/7	29	21	8	34	34	0	UGT3A1,missense_variant,p.Thr523Ile,ENST00000274278,;UGT3A1,downstream_gene_variant,,ENST00000507113,;UGT3A1,downstream_gene_variant,,ENST00000503189,;UGT3A1,downstream_gene_variant,,ENST00000513233,;UGT3A1,3_prime_UTR_variant,,ENST00000515801,;	A	ENSG00000145626
UGT3A1	0	.	GRCh37	5	35962969	35962969	+	Intron	SNP	C	C	T	novel	.	ESCA		TCGA-Z6-A8JE-01A-11D-A37C-09	TCGA-Z6-A8JE-10A-01D-A37F-09	C	C	.	.	.	.	.	.	.	.	.	.	.	.	.	.	.	c.843+2519G>A	.	.	ENST00000274278	.	65	45	20	28	28	0	UGT3A1,3_prime_UTR_variant,,ENST00000333811,;UGT3A1,intron_variant,,ENST00000274278,;UGT3A1,intron_variant,,ENST00000507113,;UGT3A1,intron_variant,,ENST00000503189,;UGT3A1,intron_variant,,ENST00000513233,;UGT3A1,3_prime_UTR_variant,,ENST00000515801,;	T	ENSG00000145626
UGT3A2	0	.	GRCh37	5	36051985	36051985	+	Missense_Mutation	SNP	T	T	A	novel	.	ESCA		TCGA-IC-A6RE-01A-11D-A33E-09	TCGA-IC-A6RE-10A-01D-A33H-09	T	T	.	.	.	.	.	.	.	.	.	.	.	.	.	.	.	c.298A>T	p.Thr100Ser	p.T100S	ENST00000282507	3/7	99	83	16	157	157	0	UGT3A2,missense_variant,p.Thr66Ser,ENST00000513300,;UGT3A2,missense_variant,p.Thr100Ser,ENST00000515131,;UGT3A2,missense_variant,p.Thr100Ser,ENST00000282507,;UGT3A2,5_prime_UTR_variant,,ENST00000545528,;UGT3A2,non_coding_transcript_exon_variant,,ENST00000504954,;UGT3A2,missense_variant,p.Thr100Ser,ENST00000504685,;	A	ENSG00000168671
UGT3A2	0	.	GRCh37	5	36051985	36051985	+	Missense_Mutation	SNP	T	T	A	novel	.	ESCA		TCGA-IC-A6RE-01A-11D-A33E-09	TCGA-IC-A6RE-11A-12D-A33E-09	T	T	.	.	.	.	.	.	.	.	.	.	.	.	.	.	.	c.298A>T	p.Thr100Ser	p.T100S	ENST00000282507	3/7	99	83	16	79	79	0	UGT3A2,missense_variant,p.Thr66Ser,ENST00000513300,;UGT3A2,missense_variant,p.Thr100Ser,ENST00000515131,;UGT3A2,missense_variant,p.Thr100Ser,ENST00000282507,;UGT3A2,5_prime_UTR_variant,,ENST00000545528,;UGT3A2,non_coding_transcript_exon_variant,,ENST00000504954,;UGT3A2,missense_variant,p.Thr100Ser,ENST00000504685,;	A	ENSG00000168671
UGT3A2	0	.	GRCh37	5	36037942	36037942	+	Missense_Mutation	SNP	C	C	T	.	.	ESCA		TCGA-JY-A939-01A-12D-A37C-09	TCGA-JY-A939-10A-01D-A37F-09	C	C	.	.	.	.	.	.	.	.	.	.	.	.	.	.	.	c.1252G>A	p.Glu418Lys	p.E418K	ENST00000282507	6/7	62	53	9	72	72	0	UGT3A2,missense_variant,p.Glu384Lys,ENST00000513300,;UGT3A2,missense_variant,p.Glu116Lys,ENST00000545528,;UGT3A2,missense_variant,p.Glu418Lys,ENST00000282507,;UGT3A2,downstream_gene_variant,,ENST00000504954,;UGT3A2,3_prime_UTR_variant,,ENST00000504685,;	T	ENSG00000168671
UGT3A2	0	.	GRCh37	5	36066893	36066893	+	5'UTR	SNP	C	C	T	rs775337527	.	ESCA		TCGA-L5-A4OT-01A-11D-A28B-09	TCGA-L5-A4OT-11A-11D-A28E-09	C	C	.	.	.	.	.	.	.	.	.	.	.	.	.	.	.	c.-2G>A	.	.	ENST00000282507	1/7	67	54	13	48	48	0	UGT3A2,5_prime_UTR_variant,,ENST00000513300,;UGT3A2,5_prime_UTR_variant,,ENST00000545528,;UGT3A2,5_prime_UTR_variant,,ENST00000515131,;UGT3A2,5_prime_UTR_variant,,ENST00000282507,;UGT3A2,intron_variant,,ENST00000504954,;UGT3A2,5_prime_UTR_variant,,ENST00000504685,;CTD-2197M16.1,downstream_gene_variant,,ENST00000505367,;	T	ENSG00000168671
UGT3A2	0	.	GRCh37	5	36066850	36066855	+	Frame_Shift_Del	DEL	GAGAAG	GAGAAG	AA	novel	.	ESCA		TCGA-V5-AASV-01A-11D-A387-09	TCGA-V5-AASV-10A-01D-A38A-09	GAGAAG	GAGAAG	.	.	.	.	.	.	.	.	.	.	.	.	.	.	.	c.37_42delCTTCTCinsTT	p.Leu13PhefsTer13	p.L13Ffs*13	ENST00000282507	1/7	74	53	21	76	76	0	UGT3A2,frameshift_variant,p.Leu13PhefsTer13,ENST00000513300,;UGT3A2,frameshift_variant,p.Leu13PhefsTer13,ENST00000515131,;UGT3A2,frameshift_variant,p.Leu13PhefsTer13,ENST00000282507,;UGT3A2,5_prime_UTR_variant,,ENST00000545528,;UGT3A2,intron_variant,,ENST00000504954,;UGT3A2,frameshift_variant,p.Leu13PhefsTer13,ENST00000504685,;	AA	ENSG00000168671
UGT3A2	0	.	GRCh37	5	36035772	36035772	+	3'UTR	SNP	A	A	G	novel	.	ESCA		TCGA-VR-AA7I-01A-11D-A403-09	TCGA-VR-AA7I-10A-01D-A403-09	A	A	.	.	.	.	.	.	.	.	.	.	.	.	.	.	.	c.*28T>C	.	.	ENST00000282507	7/7	35	20	14	30	29	0	UGT3A2,3_prime_UTR_variant,,ENST00000513300,;UGT3A2,3_prime_UTR_variant,,ENST00000545528,;UGT3A2,3_prime_UTR_variant,,ENST00000282507,;UGT3A2,downstream_gene_variant,,ENST00000504954,;UGT3A2,3_prime_UTR_variant,,ENST00000504685,;	G	ENSG00000168671
UGT8	0	.	GRCh37	4	115585172	115585172	+	Missense_Mutation	SNP	G	G	T	novel	.	ESCA		TCGA-LN-A49Y-01A-11D-A27G-09	TCGA-LN-A49Y-10A-01D-A27G-09	G	G	.	.	.	.	.	.	.	.	.	.	.	.	.	.	.	c.844G>T	p.Gly282Cys	p.G282C	ENST00000310836	3/6	42	25	16	30	30	0	UGT8,missense_variant,p.Gly282Cys,ENST00000310836,;UGT8,missense_variant,p.Gly282Cys,ENST00000394511,;	T	ENSG00000174607
[truncated: 66 more columns]

## Sheet: GBM
Hugo_Symbol	Entrez_Gene_Id	Center	NCBI_Build	Chromosome	Start_Position	End_Position	Strand	Variant_Classification	Variant_Type	Reference_Allele	Tumor_Seq_Allele1	Tumor_Seq_Allele2	dbSNP_RS	dbSNP_Val_Status	cancer type		Tumor_Sample_Barcode	Matched_Norm_Sample_Barcode	Match_Norm_Seq_Allele1	Match_Norm_Seq_Allele2	Tumor_Validation_Allele1	Tumor_Validation_Allele2	Match_Norm_Validation_Allele1	Match_Norm_Validation_Allele2	Verification_Status	Validation_Status	Mutation_Status	Sequencing_Phase	Sequence_Source	Validation_Method	Score	BAM_File	Sequencer	Tumor_Sample_UUID	Matched_Norm_Sample_UUID	HGVSc	HGVSp	HGVSp_Short	Transcript_ID	Exon_Number	t_depth	t_ref_count	t_alt_count	n_depth	n_ref_count	n_alt_count	all_effects	Allele	Gene
UGT1A10	0	.	GRCh37	2	234545195	234545195	+	Silent	SNP	C	C	T	.	.	GBM		TCGA-14-0789-01A-01D-1492-08	TCGA-14-0789-10A-01D-1492-08	C	C	.	.	.	.	.	.	.	.	.	.	.	.	.	.	.	c.27C>T	p.%3D	p.P9P	ENST00000344644	1/5	164	124	39	111	111	0	UGT1A10,synonymous_variant,p.%3D,ENST00000373445,;UGT1A10,synonymous_variant,p.%3D,ENST00000344644,;UGT1A8,intron_variant,,ENST00000373450,;	T	ENSG00000242515
UGT1A10	0	.	GRCh37	2	234545533	234545533	+	Missense_Mutation	SNP	C	C	T	rs145610800	.	GBM		TCGA-19-5959-01A-11D-1696-08	TCGA-19-5959-10A-01D-1696-08	C	C	.	.	.	.	.	.	.	.	.	.	.	.	.	.	.	c.365C>T	p.Ser122Leu	p.S122L	ENST00000344644	1/5	144	85	59	148	148	0	UGT1A10,missense_variant,p.Ser122Leu,ENST00000373445,;UGT1A10,missense_variant,p.Ser122Leu,ENST00000344644,;UGT1A8,intron_variant,,ENST00000373450,;	T	ENSG00000242515
UGT1A3	0	.	GRCh37	2	234638325	234638325	+	Missense_Mutation	SNP	A	A	G	novel	.	GBM		TCGA-06-0125-02A-11D-2280-08	TCGA-06-0125-10A-01D-1490-08	A	A	.	.	.	.	.	.	.	.	.	.	.	.	.	.	.	c.553A>G	p.Thr185Ala	p.T185A	ENST00000482026	1/5	211	153	58	384	384	0	UGT1A3,missense_variant,p.Thr185Ala,ENST00000482026,;UGT1A8,missense_variant,p.Thr185Ala,ENST00000609767,;UGT1A10,intron_variant,,ENST00000373445,;UGT1A4,intron_variant,,ENST00000373409,;UGT1A6,intron_variant,,ENST00000305139,;UGT1A6,intron_variant,,ENST00000373424,;UGT1A8,intron_variant,,ENST00000608381,;UGT1A7,intron_variant,,ENST00000373426,;UGT1A8,intron_variant,,ENST00000609637,;UGT1A5,intro…	G	ENSG00000243135
UGT1A3	0	.	GRCh37	2	234637924	234637924	+	Missense_Mutation	SNP	T	T	C	novel	.	GBM		TCGA-RR-A6KB-01A-12D-A33T-08	TCGA-RR-A6KB-10A-01D-A33W-08	T	T	.	.	.	.	.	.	.	.	.	.	.	.	.	.	.	c.152T>C	p.Leu51Pro	p.L51P	ENST00000482026	1/5	78	56	22	72	72	0	UGT1A3,missense_variant,p.Leu51Pro,ENST00000482026,;UGT1A8,missense_variant,p.Leu51Pro,ENST00000609767,;UGT1A10,intron_variant,,ENST00000373445,;UGT1A4,intron_variant,,ENST00000373409,;UGT1A6,intron_variant,,ENST00000305139,;UGT1A6,intron_variant,,ENST00000373424,;UGT1A8,intron_variant,,ENST00000608381,;UGT1A7,intron_variant,,ENST00000373426,;UGT1A8,intron_variant,,ENST00000609637,;UGT1A5,intron_…	C	ENSG00000243135
UGT1A4	0	.	GRCh37	2	234680978	234680978	+	Missense_Mutation	SNP	G	G	A	novel	.	GBM		TCGA-12-0819-01A-01W-0424-08	TCGA-12-0819-10A-01W-0424-08	G	G	.	.	.	.	.	.	.	.	.	.	.	.	.	.	.	c.1378G>A	p.Val460Met	p.V460M	ENST00000373409	5/5	327	201	126	296	296	0	UGT1A4,missense_variant,p.Val460Met,ENST00000373409,;UGT1A6,missense_variant,p.Val458Met,ENST00000305139,;UGT1A3,missense_variant,p.Val460Met,ENST00000482026,;UGT1A6,missense_variant,p.Val191Met,ENST00000373424,;UGT1A8,missense_variant,p.Val459Met,ENST00000608383,;UGT1A8,missense_variant,p.Val460Met,ENST00000608381,;UGT1A7,missense_variant,p.Val456Met,ENST00000373426,;UGT1A8,missense_variant,p.Va…	A	ENSG00000244474
UGT1A4	0	.	GRCh37	2	234627963	234627963	+	Nonsense_Mutation	SNP	C	C	A	rs149079663	.	GBM		TCGA-26-1799-01A-02W-0643-08	TCGA-26-1799-10A-01W-0643-08	C	C	.	.	.	.	.	.	.	.	.	.	.	.	.	.	.	c.497C>A	p.Ser166Ter	p.S166*	ENST00000373409	1/5	263	251	12	381	381	0	UGT1A4,stop_gained,p.Ser166Ter,ENST00000373409,;UGT1A10,intron_variant,,ENST00000373445,;UGT1A6,intron_variant,,ENST00000305139,;UGT1A6,intron_variant,,ENST00000373424,;UGT1A8,intron_variant,,ENST00000608381,;UGT1A7,intron_variant,,ENST00000373426,;UGT1A8,intron_variant,,ENST00000609637,;UGT1A5,intron_variant,,ENST00000373414,;UGT1A6,intron_variant,,ENST00000406651,;UGT1A10,intron_variant,,ENST00…	A	ENSG00000244474
UGT1A4	0	.	GRCh37	2	234681031	234681031	+	Silent	SNP	C	C	T	rs28900406	.	GBM		TCGA-41-5651-01A-01D-1696-08	TCGA-41-5651-10A-01D-1696-08	C	C	.	.	.	.	.	.	.	.	.	.	.	.	.	.	.	c.1431C>T	p.%3D	p.P477P	ENST00000373409	5/5	92	56	36	139	139	0	UGT1A4,synonymous_variant,p.%3D,ENST00000373409,;UGT1A6,synonymous_variant,p.%3D,ENST00000305139,;UGT1A3,synonymous_variant,p.%3D,ENST00000482026,;UGT1A6,synonymous_variant,p.%3D,ENST00000373424,;UGT1A8,synonymous_variant,p.%3D,ENST00000608383,;UGT1A8,synonymous_variant,p.%3D,ENST00000608381,;UGT1A7,synonymous_variant,p.%3D,ENST00000373426,;UGT1A8,synonymous_variant,p.%3D,ENST00000609637,;UGT1A8,…	T	ENSG00000244474
UGT1A4	0	.	GRCh37	2	234628246	234628246	+	Silent	SNP	C	C	T	.	.	GBM		TCGA-74-6575-01A-11D-1845-08	TCGA-74-6575-10A-01D-1845-08	C	C	.	.	.	.	.	.	.	.	.	.	.	.	.	.	.	c.780C>T	p.%3D	p.D260D	ENST00000373409	1/5	324	232	92	347	347	0	UGT1A4,synonymous_variant,p.%3D,ENST00000373409,;UGT1A10,intron_variant,,ENST00000373445,;UGT1A6,intron_variant,,ENST00000305139,;UGT1A6,intron_variant,,ENST00000373424,;UGT1A8,intron_variant,,ENST00000608381,;UGT1A7,intron_variant,,ENST00000373426,;UGT1A8,intron_variant,,ENST00000609637,;UGT1A5,intron_variant,,ENST00000373414,;UGT1A6,intron_variant,,ENST00000406651,;UGT1A10,intron_variant,,ENST0…	T	ENSG00000244474
UGT1A5	0	.	GRCh37	2	234621856	234621856	+	Silent	SNP	C	C	T	rs17874940	.	GBM		TCGA-06-0145-01A-01D-1490-08	TCGA-06-0145-10A-01D-1490-08	C	C	.	.	.	.	.	.	.	.	.	.	.	.	.	.	.	c.219C>T	p.%3D	p.N73N	ENST00000373414	1/5	147	97	50	179	179	0	UGT1A8,synonymous_variant,p.%3D,ENST00000608381,;UGT1A5,synonymous_variant,p.%3D,ENST00000373414,;UGT1A10,intron_variant,,ENST00000373445,;UGT1A6,intron_variant,,ENST00000305139,;UGT1A6,intron_variant,,ENST00000373424,;UGT1A7,intron_variant,,ENST00000373426,;UGT1A8,intron_variant,,ENST00000609637,;UGT1A6,intron_variant,,ENST00000406651,;UGT1A10,intron_variant,,ENST00000344644,;UGT1A8,intron_varia…	T	ENSG00000240224
UGT1A6	0	.	GRCh37	2	234602272	234602272	+	Nonsense_Mutation	SNP	C	C	T	rs571650145	.	GBM		TCGA-06-0122-01A-01D-1490-08	TCGA-06-0122-10A-01D-1490-08	C	C	.	.	.	.	.	.	.	.	.	.	.	.	.	.	.	c.622C>T	p.Arg208Ter	p.R208*	ENST00000305139	1/5	211	132	78	327	327	0	UGT1A6,stop_gained,p.Arg208Ter,ENST00000305139,;UGT1A10,intron_variant,,ENST00000373445,;UGT1A6,intron_variant,,ENST00000373424,;UGT1A7,intron_variant,,ENST00000373426,;UGT1A8,intron_variant,,ENST00000609637,;UGT1A10,intron_variant,,ENST00000344644,;UGT1A8,intron_variant,,ENST00000373450,;UGT1A9,intron_variant,,ENST00000354728,;UGT1A6,downstream_gene_variant,,ENST00000441351,;UGT1A7,downstream_ge…	T	ENSG00000167165
UGT1A6	0	.	GRCh37	2	234602327	234602327	+	Missense_Mutation	SNP	T	T	G	.	.	GBM		TCGA-76-6192-01A-11D-1696-08	TCGA-76-6192-10A-01D-1696-08	T	T	.	.	.	.	.	.	.	.	.	.	.	.	.	.	.	c.677T>G	p.Phe226Cys	p.F226C	ENST00000305139	1/5	200	159	40	209	209	0	UGT1A6,missense_variant,p.Phe226Cys,ENST00000305139,;UGT1A10,intron_variant,,ENST00000373445,;UGT1A6,intron_variant,,ENST00000373424,;UGT1A7,intron_variant,,ENST00000373426,;UGT1A8,intron_variant,,ENST00000609637,;UGT1A10,intron_variant,,ENST00000344644,;UGT1A8,intron_variant,,ENST00000373450,;UGT1A9,intron_variant,,ENST00000354728,;UGT1A6,downstream_gene_variant,,ENST00000441351,;UGT1A7,downstre…	G	ENSG00000167165
UGT1A7	0	.	GRCh37	2	234590933	234590933	+	Missense_Mutation	SNP	T	T	A	novel	.	GBM		TCGA-06-1802-01A-01W-0643-08	TCGA-06-1802-10A-01W-0643-08	T	T	.	.	.	.	.	.	.	.	.	.	.	.	.	.	.	c.350T>A	p.Phe117Tyr	p.F117Y	ENST00000373426	1/5	137	36	101	237	237	0	UGT1A7,missense_variant,p.Phe117Tyr,ENST00000373426,;UGT1A10,intron_variant,,ENST00000373445,;UGT1A10,intron_variant,,ENST00000344644,;UGT1A8,intron_variant,,ENST00000373450,;UGT1A8,intron_variant,,ENST00000609637,;UGT1A9,intron_variant,,ENST00000354728,;UGT1A7,upstream_gene_variant,,ENST00000485022,;	A	ENSG00000244122
UGT1A8	0	.	GRCh37	2	234668958	234668958	+	Intron	SNP	C	C	T	rs370790922	.	GBM		TCGA-06-0211-01B-01D-1491-08	TCGA-06-0211-10A-01D-1491-08	C	C	.	.	.	.	.	.	.	.	.	.	.	.	.	.	.	c.868-6722C>T	.	.	ENST00000609767	.	55	32	22	66	66	0	UGT1A8,missense_variant,p.Arg9Cys,ENST00000608383,;UGT1A8,missense_variant,p.Arg9Cys,ENST00000360418,;UGT1A1,missense_variant,p.Arg9Cys,ENST00000305208,;UGT1A10,intron_variant,,ENST00000373445,;UGT1A4,intron_variant,,ENST00000373409,;UGT1A6,intron_variant,,ENST00000305139,;UGT1A3,intron_variant,,ENST00000482026,;UGT1A6,intron_variant,,ENST00000373424,;UGT1A8,intron_variant,,ENST00000608381,;UGT1A…	T	ENSG00000241635
UGT1A8	0	.	GRCh37	2	234669494	234669494	+	Intron	SNP	C	C	T	novel	.	GBM		TCGA-16-1460-01A-01W-0643-08	TCGA-16-1460-10A-01W-0643-08	C	C	.	.	.	.	.	.	.	.	.	.	.	.	.	.	.	c.868-6186C>T	.	.	ENST00000609767	.	273	236	37	662	662	0	UGT1A8,synonymous_variant,p.%3D,ENST00000608383,;UGT1A8,synonymous_variant,p.%3D,ENST00000360418,;UGT1A1,synonymous_variant,p.%3D,ENST00000305208,;UGT1A10,intron_variant,,ENST00000373445,;UGT1A4,intron_variant,,ENST00000373409,;UGT1A6,intron_variant,,ENST00000305139,;UGT1A3,intron_variant,,ENST00000482026,;UGT1A6,intron_variant,,ENST00000373424,;UGT1A8,intron_variant,,ENST00000608381,;UGT1A7,intr…	T	ENSG00000241635
UGT1A8	0	.	GRCh37	2	234669017	234669017	+	Intron	SNP	G	G	A	.	.	GBM		TCGA-19-2625-01A-01D-1495-08	TCGA-19-2625-10A-01D-1495-08	G	G	.	.	.	.	.	.	.	.	.	.	.	.	.	.	.	c.868-6663G>A	.	.	ENST00000609767	.	49	38	11	63	63	0	UGT1A8,synonymous_variant,p.%3D,ENST00000608383,;UGT1A8,synonymous_variant,p.%3D,ENST00000360418,;UGT1A1,synonymous_variant,p.%3D,ENST00000305208,;UGT1A10,intron_variant,,ENST00000373445,;UGT1A4,intron_variant,,ENST00000373409,;UGT1A6,intron_variant,,ENST00000305139,;UGT1A3,intron_variant,,ENST00000482026,;UGT1A6,intron_variant,,ENST00000373424,;UGT1A8,intron_variant,,ENST00000608381,;UGT1A7,intr…	A	ENSG00000241635
UGT1A9	0	.	GRCh37	2	234581204	234581204	+	Silent	SNP	G	G	A	novel	.	GBM		TCGA-06-1800-01A-01W-0643-08	TCGA-06-1800-10A-01W-0643-08	G	G	.	.	.	.	.	.	.	.	.	.	.	.	.	.	.	c.624G>A	p.%3D	p.R208R	ENST00000354728	1/5	1325	1288	37	1422	1421	1	UGT1A8,synonymous_variant,p.%3D,ENST00000609637,;UGT1A9,synonymous_variant,p.%3D,ENST00000354728,;UGT1A10,intron_variant,,ENST00000373445,;UGT1A10,intron_variant,,ENST00000344644,;UGT1A8,intron_variant,,ENST00000373450,;	A	ENSG00000241119
UGT1A9	0	.	GRCh37	2	234581265	234581265	+	Missense_Mutation	SNP	G	G	A	novel	.	GBM		TCGA-06-1800-01A-01W-0643-08	TCGA-06-1800-10A-01W-0643-08	G	G	.	.	.	.	.	.	.	.	.	.	.	.	.	.	.	c.685G>A	p.Glu229Lys	p.E229K	ENST00000354728	1/5	1004	982	22	999	999	0	UGT1A8,missense_variant,p.Glu229Lys,ENST00000609637,;UGT1A9,missense_variant,p.Glu229Lys,ENST00000354728,;UGT1A10,intron_variant,,ENST00000373445,;UGT1A10,intron_variant,,ENST00000344644,;UGT1A8,intron_variant,,ENST00000373450,;	A	ENSG00000241119
UGT1A9	0	.	GRCh37	2	234580843	234580843	+	Missense_Mutation	SNP	G	G	A	rs148603525	.	GBM		TCGA-06-5858-01A-01D-1696-08	TCGA-06-5858-10A-01D-1696-08	G	G	.	.	.	.	.	.	.	.	.	.	.	.	.	.	.	c.263G>A	p.Arg88Gln	p.R88Q	ENST00000354728	1/5	106	32	74	132	132	0	UGT1A8,missense_variant,p.Arg88Gln,ENST00000609637,;UGT1A9,missense_variant,p.Arg88Gln,ENST00000354728,;UGT1A10,intron_variant,,ENST00000373445,;UGT1A10,intron_variant,,ENST00000344644,;UGT1A8,intron_variant,,ENST00000373450,;	A	ENSG00000241119
UGT1A9	0	.	GRCh37	2	234581229	234581229	+	Missense_Mutation	SNP	C	C	T	novel	.	GBM		TCGA-14-1396-01A-01W-0611-08	TCGA-14-1396-10A-01W-0611-08	C	C	.	.	.	.	.	.	.	.	.	.	.	.	.	.	.	c.649C>T	p.His217Tyr	p.H217Y	ENST00000354728	1/5	1057	1027	30	1254	1254	0	UGT1A8,missense_variant,p.His217Tyr,ENST00000609637,;UGT1A9,missense_variant,p.His217Tyr,ENST00000354728,;UGT1A10,intron_variant,,ENST00000373445,;UGT1A10,intron_variant,,ENST00000344644,;UGT1A8,intron_variant,,ENST00000373450,;	T	ENSG00000241119
UGT2A1	0	.	GRCh37	4	70455275	70455275	+	Missense_Mutation	SNP	G	G	A	rs767856867	.	GBM		TCGA-06-0145-01A-01D-1490-08	TCGA-06-0145-10A-01D-1490-08	G	G	.	.	.	.	.	.	.	.	.	.	.	.	.	.	.	c.1897C>T	p.Arg633Cys	p.R633C	ENST00000514019	7/7	200	128	71	218	218	0	UGT2A1,missense_variant,p.Arg467Cys,ENST00000286604,;UGT2A1,missense_variant,p.Arg633Cys,ENST00000514019,;UGT2A1,missense_variant,p.Arg467Cys,ENST00000503640,;UGT2A2,missense_variant,p.Arg433Cys,ENST00000604021,;UGT2A2,missense_variant,p.Arg476Cys,ENST00000457664,;UGT2A1,missense_variant,p.Arg423Cys,ENST00000512704,;UGT2A2,missense_variant,p.Arg477Cys,ENST00000604629,;UGT2A1,downstream_gene_varia…	A	ENSG00000270386
UGT2A1	0	.	GRCh37	4	70512933	70512933	+	Missense_Mutation	SNP	A	A	G	novel	.	GBM		TCGA-06-1087-01A-02W-0611-08	TCGA-06-1087-10A-01W-0611-08	A	A	.	.	.	.	.	.	.	.	.	.	.	.	.	.	.	c.430T>C	p.Phe144Leu	p.F144L	ENST00000514019	2/7	142	29	112	677	677	0	UGT2A1,missense_variant,p.Phe144Leu,ENST00000505512,;UGT2A1,missense_variant,p.Phe144Leu,ENST00000286604,;UGT2A1,missense_variant,p.Phe144Leu,ENST00000514019,;UGT2A1,missense_variant,p.Phe144Leu,ENST00000512704,;UGT2A1,missense_variant,p.Phe144Leu,ENST00000503640,;	G	ENSG00000270386
UGT2A1	0	.	GRCh37	4	70513401	70513401	+	5'UTR	SNP	C	C	A	novel	.	GBM		TCGA-06-2557-01A-01D-1494-08	TCGA-06-2557-10A-01D-1494-08	C	C	.	.	.	.	.	.	.	.	.	.	.	.	.	.	.	c.-39G>T	.	.	ENST00000514019	2/7	24	17	7	29	29	0	UGT2A1,5_prime_UTR_variant,,ENST00000505512,;UGT2A1,5_prime_UTR_variant,,ENST00000286604,;UGT2A1,5_prime_UTR_variant,,ENST00000514019,;UGT2A1,5_prime_UTR_variant,,ENST00000512704,;UGT2A1,5_prime_UTR_variant,,ENST00000503640,;	A	ENSG00000270386
UGT2A1	0	.	GRCh37	4	70455147	70455147	+	Nonsense_Mutation	SNP	A	A	T	novel	.	GBM		TCGA-28-2506-01A-02W-0837-08	TCGA-28-2506-10A-01W-0838-08	A	A	.	.	.	.	.	.	.	.	.	.	.	.	.	.	.	c.2025T>A	p.Cys675Ter	p.C675*	ENST00000514019	7/7	183	172	10	95	95	0	UGT2A1,stop_gained,p.Cys509Ter,ENST00000286604,;UGT2A1,stop_gained,p.Cys675Ter,ENST00000514019,;UGT2A1,stop_gained,p.Cys509Ter,ENST00000503640,;UGT2A2,stop_gained,p.Cys475Ter,ENST00000604021,;UGT2A2,stop_gained,p.Cys518Ter,ENST00000457664,;UGT2A1,stop_gained,p.Cys465Ter,ENST00000512704,;UGT2A2,stop_gained,p.Cys519Ter,ENST00000604629,;UGT2A1,downstream_gene_variant,,ENST00000502343,;RP11-401E5.2,u…	T	ENSG00000270386
UGT2A1	0	.	GRCh37	4	70455276	70455276	+	Missense_Mutation	SNP	C	C	T	.	.	GBM		TCGA-28-5219-01A-01D-1486-08	TCGA-28-5219-10A-01D-1486-08	C	C	.	.	.	.	.	.	.	.	.	.	.	.	.	.	.	c.1896G>A	p.Met632Ile	p.M632I	ENST00000514019	7/7	281	211	70	270	270	0	UGT2A1,missense_variant,p.Met466Ile,ENST00000286604,;UGT2A1,missense_variant,p.Met632Ile,ENST00000514019,;UGT2A1,missense_variant,p.Met466Ile,ENST00000503640,;UGT2A2,missense_variant,p.Met432Ile,ENST00000604021,;UGT2A2,missense_variant,p.Met475Ile,ENST00000457664,;UGT2A1,missense_variant,p.Met422Ile,ENST00000512704,;UGT2A2,missense_variant,p.Met476Ile,ENST00000604629,;UGT2A1,downstream_gene_varia…	T	ENSG00000270386
UGT2A1	0	.	GRCh37	4	70513056	70513056	+	Missense_Mutation	SNP	T	T	C	.	.	GBM		TCGA-32-2495-01A-01D-1353-08	TCGA-32-2495-10B-01D-1353-08	T	T	.	.	.	.	.	.	.	.	.	.	.	.	.	.	.	c.307A>G	p.Thr103Ala	p.T103A	ENST00000514019	2/7	117	69	48	147	147	0	UGT2A1,missense_variant,p.Thr103Ala,ENST00000505512,;UGT2A1,missense_variant,p.Thr103Ala,ENST00000286604,;UGT2A1,missense_variant,p.Thr103Ala,ENST00000514019,;UGT2A1,missense_variant,p.Thr103Ala,ENST00000512704,;UGT2A1,missense_variant,p.Thr103Ala,ENST00000503640,;	C	ENSG00000270386
UGT2A1	0	.	GRCh37	4	70455098	70455098	+	Frame_Shift_Del	DEL	T	T	-	.	.	GBM		TCGA-32-2616-01A-01D-1495-08	TCGA-32-2616-10A-01D-1495-08	T	T	.	.	.	.	.	.	.	.	.	.	.	.	.	.	.	c.2074delA	p.Arg692GlufsTer57	p.R692Efs*57	ENST00000514019	7/7	82	63	19	67	67	0	UGT2A1,frameshift_variant,p.Arg526GlufsTer?,ENST00000286604,;UGT2A1,frameshift_variant,p.Arg692GlufsTer57,ENST00000514019,;UGT2A1,frameshift_variant,p.Arg526GlufsTer57,ENST00000503640,;UGT2A2,frameshift_variant,p.Arg492GlufsTer?,ENST00000604021,;UGT2A2,frameshift_variant,p.Arg535GlufsTer57,ENST00000457664,;UGT2A1,frameshift_variant,p.Arg482GlufsTer57,ENST00000512704,;UGT2A2,frameshift_variant,p.A…	-	ENSG00000270386
UGT2A1	0	.	GRCh37	4	70455172	70455172	+	Missense_Mutation	SNP	G	G	A	rs184187801	.	GBM		TCGA-76-6657-01A-11D-1845-08	TCGA-76-6657-10A-01D-1845-08	G	G	.	.	.	.	.	.	.	.	.	.	.	.	.	.	.	c.2000C>T	p.Thr667Met	p.T667M	ENST00000514019	7/7	143	94	49	76	76	0	UGT2A1,missense_variant,p.Thr501Met,ENST00000286604,;UGT2A1,missense_variant,p.Thr667Met,ENST00000514019,;UGT2A1,missense_variant,p.Thr501Met,ENST00000503640,;UGT2A2,missense_variant,p.Thr467Met,ENST00000604021,;UGT2A2,missense_variant,p.Thr510Met,ENST00000457664,;UGT2A1,missense_variant,p.Thr457Met,ENST00000512704,;UGT2A2,missense_variant,p.Thr511Met,ENST00000604629,;UGT2A1,downstream_gene_varia…	A	ENSG00000270386
UGT2A2	0	.	GRCh37	4	70505072	70505072	+	Missense_Mutation	SNP	A	A	G	rs151156143	.	GBM		TCGA-06-2561-01A-02D-1494-08	TCGA-06-2561-10A-01D-1494-08	A	A	.	.	.	.	.	.	.	.	.	.	.	.	.	.	.	c.287T>C	p.Ile96Thr	p.I96T	ENST00000457664	1/6	194	134	59	200	200	0	UGT2A2,missense_variant,p.Ile97Thr,ENST00000604021,;UGT2A2,missense_variant,p.Ile96Thr,ENST00000457664,;UGT2A1,missense_variant,p.Ile297Thr,ENST00000514019,;UGT2A2,missense_variant,p.Ile97Thr,ENST00000604629,;UGT2A1,intron_variant,,ENST00000286604,;UGT2A1,intron_variant,,ENST00000512704,;UGT2A1,intron_variant,,ENST00000503640,;	G	ENSG00000271271
UGT2A2	0	.	GRCh37	4	70504993	70504993	+	Missense_Mutation	SNP	T	T	A	rs200415565	.	GBM		TCGA-76-6663-01A-11D-1845-08	TCGA-76-6663-10A-01D-1845-08	T	T	.	.	.	.	.	.	.	.	.	.	.	.	.	.	.	c.366A>T	p.Lys122Asn	p.K122N	ENST00000457664	1/6	95	79	16	67	67	0	UGT2A2,missense_variant,p.Lys123Asn,ENST00000604021,;UGT2A2,missense_variant,p.Lys122Asn,ENST00000457664,;UGT2A1,missense_variant,p.Lys323Asn,ENST00000514019,;UGT2A2,missense_variant,p.Lys123Asn,ENST00000604629,;UGT2A1,intron_variant,,ENST00000286604,;UGT2A1,intron_variant,,ENST00000512704,;UGT2A1,intron_variant,,ENST00000503640,;	A	ENSG00000271271
UGT2A3	0	.	GRCh37	4	69795435	69795435	+	3'UTR	SNP	A	A	G	novel	.	GBM		TCGA-06-0184-01A-01D-1491-08	TCGA-06-0184-10B-01D-1491-08	A	A	.	.	.	.	.	.	.	.	.	.	.	.	.	.	.	c.*96T>C	.	.	ENST00000251566	6/6	38	30	7	50	50	0	UGT2A3,3_prime_UTR_variant,,ENST00000251566,;UGT2A3,3_prime_UTR_variant,,ENST00000420231,;UGT2A3,3_prime_UTR_variant,,ENST00000503012,;RP11-468N14.09,upstream_gene_variant,,ENST00000511202,;	G	ENSG00000135220
UGT2A3	0	.	GRCh37	4	69816847	69816847	+	Frame_Shift_Del	DEL	T	T	-	.	.	GBM		TCGA-06-1084-01A-01W-0611-08	TCGA-06-1084-10A-01W-0611-08	T	T	.	.	.	.	.	.	.	.	.	.	.	.	.	.	.	c.632delA	p.Asn211IlefsTer28	p.N211Ifs*28	ENST00000251566	1/6	227	178	49	282	282	0	UGT2A3,frameshift_variant,p.Asn211IlefsTer28,ENST00000251566,;UGT2A3,5_prime_UTR_variant,,ENST00000420231,;UGT2A3,frameshift_variant,p.Asn77IlefsTer28,ENST00000503012,;	-	ENSG00000135220
UGT2A3	0	.	GRCh37	4	69796959	69796959	+	Missense_Mutation	SNP	A	A	C	.	.	GBM		TCGA-14-1823-01A-01D-1494-08	TCGA-14-1823-10A-01D-1494-08	A	A	.	.	.	.	.	.	.	.	.	.	.	.	.	.	.	c.998T>G	p.Val333Gly	p.V333G	ENST00000251566	4/6	39	31	8	60	60	0	UGT2A3,missense_variant,p.Val333Gly,ENST00000251566,;UGT2A3,missense_variant,p.Val44Gly,ENST00000420231,;UGT2A3,splice_region_variant,,ENST00000503012,;	C	ENSG00000135220
UGT2A3	0	.	GRCh37	4	69798344	69798344	+	Splice_Site	SNP	A	A	G	.	.	GBM		TCGA-19-2629-01A-01D-1495-08	TCGA-19-2629-10A-01D-1495-08	A	A	.	.	.	.	.	.	.	.	.	.	.	.	.	.	.	c.996+2T>C	.	p.X332_splice	ENST00000251566	.	297	278	19	356	356	0	UGT2A3,splice_donor_variant,,ENST00000251566,;UGT2A3,splice_donor_variant,,ENST00000420231,;UGT2A3,splice_donor_variant,,ENST00000503012,;	G	ENSG00000135220
UGT2A3	0	.	GRCh37	4	69795715	69795715	+	Missense_Mutation	SNP	C	C	T	rs553189244	.	GBM		TCGA-19-5951-01A-11D-1696-08	TCGA-19-5951-10A-01D-1696-08	C	C	.	.	.	.	.	.	.	.	.	.	.	.	.	.	.	c.1400G>A	p.Arg467His	p.R467H	ENST00000251566	6/6	123	66	56	138	138	0	UGT2A3,missense_variant,p.Arg467His,ENST00000251566,;UGT2A3,missense_variant,p.Arg178His,ENST00000420231,;UGT2A3,3_prime_UTR_variant,,ENST00000503012,;	T	ENSG00000135220
UGT2A3	0	.	GRCh37	4	69798434	69798434	+	Missense_Mutation	SNP	A	A	G	.	.	GBM		TCGA-28-6450-01A-11D-1696-08	TCGA-28-6450-10A-01D-1696-08	A	A	.	.	.	.	.	.	.	.	.	.	.	.	.	.	.	c.908T>C	p.Val303Ala	p.V303A	ENST00000251566	3/6	184	130	53	118	118	0	UGT2A3,missense_variant,p.Val303Ala,ENST00000251566,;UGT2A3,missense_variant,p.Val14Ala,ENST00000420231,;UGT2A3,3_prime_UTR_variant,,ENST00000503012,;	G	ENSG00000135220
UGT2A3	0	.	GRCh37	4	69795704	69795704	+	Missense_Mutation	SNP	C	C	A	rs373529001	.	GBM		TCGA-41-2573-01A-01D-1495-08	TCGA-41-2573-10A-01D-1495-08	C	C	.	.	.	.	.	.	.	.	.	.	.	.	.	.	.	c.1411G>T	p.Ala471Ser	p.A471S	ENST00000251566	6/6	139	77	62	121	121	0	UGT2A3,missense_variant,p.Ala471Ser,ENST00000251566,;UGT2A3,missense_variant,p.Ala182Ser,ENST00000420231,;UGT2A3,3_prime_UTR_variant,,ENST00000503012,;	A	ENSG00000135220
UGT2A3	0	.	GRCh37	4	69817091	69817091	+	Missense_Mutation	SNP	A	A	G	.	.	GBM		TCGA-76-6662-01A-11D-1845-08	TCGA-76-6662-10A-01D-1845-08	A	A	.	.	.	.	.	.	.	.	.	.	.	.	.	.	.	c.388T>C	p.Tyr130His	p.Y130H	ENST00000251566	1/6	72	61	10	65	65	0	UGT2A3,missense_variant,p.Tyr130His,ENST00000251566,;UGT2A3,upstream_gene_variant,,ENST00000420231,;UGT2A3,upstream_gene_variant,,ENST00000503012,;	G	ENSG00000135220
UGT2B10	0	.	GRCh37	4	69696459	69696459	+	Silent	SNP	C	C	G	rs556468185	.	GBM		TCGA-06-0877-01A-01D-1492-08	TCGA-06-0877-10A-01D-1492-08	C	C	.	.	.	.	.	.	.	.	.	.	.	.	.	.	.	c.1449C>G	p.%3D	p.T483T	ENST00000265403	6/6	299	203	95	307	307	0	UGT2B10,synonymous_variant,p.%3D,ENST00000265403,;UGT2B10,synonymous_variant,p.%3D,ENST00000458688,;RP11-468N14.3,downstream_gene_variant,,ENST00000512503,;	G	ENSG00000109181
UGT2B10	0	.	GRCh37	4	69696570	69696570	+	Silent	SNP	A	A	G	novel	.	GBM		TCGA-06-1805-01A-01W-0643-08	TCGA-06-1805-10A-01W-0644-08	A	A	.	.	.	.	.	.	.	.	.	.	.	.	.	.	.	c.1560A>G	p.%3D	p.R520R	ENST00000265403	6/6	330	303	27	214	214	0	UGT2B10,synonymous_variant,p.%3D,ENST00000265403,;UGT2B10,synonymous_variant,p.%3D,ENST00000458688,;RP11-468N14.3,downstream_gene_variant,,ENST00000512503,;	G	ENSG00000109181
UGT2B10	0	.	GRCh37	4	69696492	69696492	+	Silent	SNP	G	G	T	.	.	GBM		TCGA-26-5136-01B-01D-1486-08	TCGA-26-5136-10A-01D-1486-08	G	G	.	.	.	.	.	.	.	.	.	.	.	.	.	.	.	c.1482G>T	p.%3D	p.G494G	ENST00000265403	6/6	319	203	116	269	269	0	UGT2B10,synonymous_variant,p.%3D,ENST00000265403,;UGT2B10,synonymous_variant,p.%3D,ENST00000458688,;RP11-468N14.3,downstream_gene_variant,,ENST00000512503,;	T	ENSG00000109181
UGT2B10	0	.	GRCh37	4	69681966	69681966	+	Missense_Mutation	SNP	C	C	A	.	.	GBM		TCGA-27-1836-01A-01D-1494-08	TCGA-27-1836-10A-01D-1494-08	C	C	.	.	.	.	.	.	.	.	.	.	.	.	.	.	.	c.229C>A	p.Pro77Thr	p.P77T	ENST00000265403	1/6	203	127	76	199	199	0	UGT2B10,missense_variant,p.Pro77Thr,ENST00000265403,;UGT2B10,missense_variant,p.Pro77Thr,ENST00000458688,;RP11-468N14.1,downstream_gene_variant,,ENST00000507455,;	A	ENSG00000109181
UGT2B10	0	.	GRCh37	4	69696436	69696436	+	Nonsense_Mutation	SNP	C	C	T	rs754651977	.	GBM		TCGA-OX-A56R-01A-11D-A33T-08	TCGA-OX-A56R-10A-01D-A33W-08	C	C	.	.	.	.	.	.	.	.	.	.	.	.	.	.	.	c.1426C>T	p.Arg476Ter	p.R476*	ENST00000265403	6/6	179	101	77	154	154	0	UGT2B10,stop_gained,p.Arg476Ter,ENST00000265403,;UGT2B10,stop_gained,p.Arg392Ter,ENST00000458688,;RP11-468N14.3,downstream_gene_variant,,ENST00000512503,;	T	ENSG00000109181
UGT2B11	0	.	GRCh37	4	70079996	70079996	+	Missense_Mutation	SNP	A	A	G	.	.	GBM		TCGA-06-0188-01A-01D-1491-08	TCGA-06-0188-10B-01D-1491-08	A	A	.	.	.	.	.	.	.	.	.	.	.	.	.	.	.	c.445T>C	p.Phe149Leu	p.F149L	ENST00000446444	1/6	177	97	79	212	212	0	UGT2B11,missense_variant,p.Phe149Leu,ENST00000446444,;RP11-704M14.1,intron_variant,,ENST00000504301,;RP11-704M14.1,intron_variant,,ENST00000505646,;RP11-704M14.2,downstream_gene_variant,,ENST00000514003,;	G	ENSG00000213759
UGT2B11	0	.	GRCh37	4	70080518	70080518	+	5'Flank	SNP	A	A	G	novel	.	GBM		TCGA-06-1805-01A-01W-0643-08	TCGA-06-1805-10A-01W-0644-08	A	A	.	.	.	.	.	.	.	.	.	.	.	.	.	.	.	.	.	.	ENST00000446444	.	63	37	26	129	129	0	UGT2B11,upstream_gene_variant,,ENST00000446444,;RP11-704M14.1,non_coding_transcript_exon_variant,,ENST00000505646,;RP11-704M14.1,downstream_gene_variant,,ENST00000504301,;RP11-704M14.2,downstream_gene_variant,,ENST00000514003,;	G	ENSG00000213759
UGT2B11	0	.	GRCh37	4	70074175	70074175	+	Missense_Mutation	SNP	G	G	C	novel	.	GBM		TCGA-16-0849-01A-01W-0424-08	TCGA-16-0849-10A-01W-0424-08	G	G	.	.	.	.	.	.	.	.	.	.	.	.	.	.	.	c.896C>G	p.Ser299Cys	p.S299C	ENST00000446444	3/6	737	712	25	799	799	0	UGT2B11,missense_variant,p.Ser299Cys,ENST00000446444,;RP11-704M14.1,intron_variant,,ENST00000504301,;RP11-704M14.1,intron_variant,,ENST00000505646,;UGT2B11,upstream_gene_variant,,ENST00000513315,;	C	ENSG00000213759
UGT2B11	0	.	GRCh37	4	70079956	70079956	+	Missense_Mutation	SNP	G	G	A	rs775064565	.	GBM		TCGA-27-2527-01A-01D-1494-08	TCGA-27-2527-10A-01D-1494-08	G	G	.	.	.	.	.	.	.	.	.	.	.	.	.	.	.	c.485C>T	p.Ala162Val	p.A162V	ENST00000446444	1/6	178	140	38	211	210	0	UGT2B11,missense_variant,p.Ala162Val,ENST00000446444,;RP11-704M14.1,intron_variant,,ENST00000504301,;RP11-704M14.1,intron_variant,,ENST00000505646,;RP11-704M14.2,downstream_gene_variant,,ENST00000514003,;	A	ENSG00000213759
UGT2B15	0	.	GRCh37	4	69512686	69512686	+	3'UTR	SNP	A	A	G	novel	.	GBM		TCGA-06-0214-01A-02D-1491-08	TCGA-06-0214-10A-01D-1491-08	A	A	.	.	.	.	.	.	.	.	.	.	.	.	.	.	.	c.*136T>C	.	.	ENST00000338206	6/6	40	34	6	45	45	0	UGT2B15,3_prime_UTR_variant,,ENST00000338206,;	G	ENSG00000196620
UGT2B15	0	.	GRCh37	4	69519900	69519900	+	Missense_Mutation	SNP	G	G	A	novel	.	GBM		TCGA-12-0662-01A-01W-0348-08	TCGA-12-0662-10A-01W-0348-08	G	G	.	.	.	.	.	.	.	.	.	.	.	.	.	.	.	c.1168C>T	p.Pro390Ser	p.P390S	ENST00000338206	5/6	2719	2203	515	1566	1566	0	UGT2B15,missense_variant,p.Pro390Ser,ENST00000338206,;	A	ENSG00000196620
UGT2B15	0	.	GRCh37	4	69533848	69533848	+	Silent	SNP	G	G	A	novel	.	GBM		TCGA-12-0828-01A-01W-0424-08	TCGA-12-0828-10A-01W-0424-08	G	G	.	.	.	.	.	.	.	.	.	.	.	.	.	.	.	c.783C>T	p.%3D	p.T261T	ENST00000338206	2/6	530	352	177	1069	1068	0	UGT2B15,synonymous_variant,p.%3D,ENST00000338206,;	A	ENSG00000196620
UGT2B15	0	.	GRCh37	4	69512983	69512983	+	Nonsense_Mutation	SNP	G	G	A	rs774308500	.	GBM		TCGA-19-1787-01B-01D-1495-08	TCGA-19-1787-10A-01D-1495-08	G	G	.	.	.	.	.	.	.	.	.	.	.	.	.	.	.	c.1432C>T	p.Arg478Ter	p.R478*	ENST00000338206	6/6	180	55	124	179	179	0	UGT2B15,stop_gained,p.Arg478Ter,ENST00000338206,;	A	ENSG00000196620
UGT2B15	0	.	GRCh37	4	69536075	69536075	+	Missense_Mutation	SNP	C	C	A	.	.	GBM		TCGA-28-5214-01A-01D-1486-08	TCGA-28-5214-10A-01D-1486-08	C	C	.	.	.	.	.	.	.	.	.	.	.	.	.	.	.	c.262G>T	p.Asp88Tyr	p.D88Y	ENST00000338206	1/6	286	176	110	312	312	0	UGT2B15,missense_variant,p.Asp88Tyr,ENST00000338206,;	A	ENSG00000196620
UGT2B17	0	.	GRCh37	4	69403557	69403557	+	Missense_Mutation	SNP	C	C	T	.	.	GBM		TCGA-12-0615-01A-01D-1492-08	TCGA-12-0615-10A-01D-1492-08	C	C	.	.	.	.	.	.	.	.	.	.	.	.	.	.	.	c.1379G>A	p.Arg460Gln	p.R460Q	ENST00000317746	6/6	343	204	138	368	368	0	UGT2B17,missense_variant,p.Arg460Gln,ENST00000317746,;	T	ENSG00000197888
UGT2B17	0	.	GRCh37	4	69434003	69434003	+	Missense_Mutation	SNP	C	C	A	novel	.	GBM		TCGA-12-0829-01A-01W-0424-08	TCGA-12-0829-10A-01W-0424-08	C	C	.	.	.	.	.	.	.	.	.	.	.	.	.	.	.	c.200G>T	p.Ser67Ile	p.S67I	ENST00000317746	1/6	360	228	132	254	254	0	UGT2B17,missense_variant,p.Ser67Ile,ENST00000317746,;	A	ENSG00000197888
UGT2B17	0	.	GRCh37	4	69416570	69416570	+	Missense_Mutation	SNP	C	C	A	novel	.	GBM		TCGA-12-1089-01A-01W-0611-08	TCGA-12-1089-10C-01W-0611-08	C	C	.	.	.	.	.	.	.	.	.	.	.	.	.	.	.	c.1138G>T	p.Gly380Cys	p.G380C	ENST00000317746	5/6	891	868	23	1318	1318	0	UGT2B17,missense_variant,p.Gly380Cys,ENST00000317746,;	A	ENSG00000197888
UGT2B17	0	.	GRCh37	4	69403498	69403498	+	Missense_Mutation	SNP	C	C	T	rs186138322	.	GBM		TCGA-26-A7UX-01B-11D-A391-08	TCGA-26-A7UX-10A-01D-A394-08	C	C	.	.	.	.	.	.	.	.	.	.	.	.	.	.	.	c.1438G>A	p.Ala480Thr	p.A480T	ENST00000317746	6/6	187	92	95	168	168	0	UGT2B17,missense_variant,p.Ala480Thr,ENST00000317746,;	T	ENSG00000197888
UGT2B28	0	.	GRCh37	4	70156391	70156391	+	Missense_Mutation	SNP	T	T	C	rs569133364	.	GBM		TCGA-02-0003-01A-01D-1490-08	TCGA-02-0003-10A-01D-1490-08	T	T	.	.	.	.	.	.	.	.	.	.	.	.	.	.	.	c.1172T>C	p.Val391Ala	p.V391A	ENST00000335568	5/6	404	357	47	332	332	0	UGT2B28,missense_variant,p.Val391Ala,ENST00000335568,;UGT2B28,intron_variant,,ENST00000511240,;	C	ENSG00000135226
UGT2B28	0	.	GRCh37	4	70148376	70148376	+	Missense_Mutation	SNP	C	C	A	.	.	GBM		TCGA-06-0126-01A-01D-1490-08	TCGA-06-0126-10A-01D-1490-08	C	C	.	.	.	.	.	.	.	.	.	.	.	.	.	.	.	c.866C>A	p.Pro289His	p.P289H	ENST00000335568	2/6	291	178	113	403	403	0	UGT2B28,missense_variant,p.Pro289His,ENST00000511240,;UGT2B28,missense_variant,p.Pro289His,ENST00000335568,;	A	ENSG00000135226
UGT2B28	0	.	GRCh37	4	70156481	70156481	+	Missense_Mutation	SNP	C	C	T	rs371664274	.	GBM		TCGA-06-0188-01A-01D-1491-08	TCGA-06-0188-10B-01D-1491-08	C	C	.	.	.	.	.	.	.	.	.	.	.	.	.	.	.	c.1262C>T	p.Ser421Leu	p.S421L	ENST00000335568	5/6	254	163	91	349	349	0	UGT2B28,missense_variant,p.Ser421Leu,ENST00000335568,;UGT2B28,intron_variant,,ENST00000511240,;	T	ENSG00000135226
UGT2B28	0	.	GRCh37	4	70148376	70148376	+	Missense_Mutation	SNP	C	C	A	.	.	GBM		TCGA-27-1837-01A-01D-1494-08	TCGA-27-1837-10A-01D-1494-08	C	C	.	.	.	.	.	.	.	.	.	.	.	.	.	.	.	c.866C>A	p.Pro289His	p.P289H	ENST00000335568	2/6	204	126	78	463	463	0	UGT2B28,missense_variant,p.Pro289His,ENST00000511240,;UGT2B28,missense_variant,p.Pro289His,ENST00000335568,;	A	ENSG00000135226
UGT2B28	0	.	GRCh37	4	70146911	70146911	+	Missense_Mutation	SNP	G	G	T	.	.	GBM		TCGA-28-2502-01B-01D-1494-08	TCGA-28-2502-10A-01D-1494-08	G	G	.	.	.	.	.	.	.	.	.	.	.	.	.	.	.	c.693G>T	p.Lys231Asn	p.K231N	ENST00000335568	1/6	232	186	45	267	267	0	UGT2B28,missense_variant,p.Lys231Asn,ENST00000511240,;UGT2B28,missense_variant,p.Lys231Asn,ENST00000335568,;	T	ENSG00000135226
UGT2B28	0	.	GRCh37	4	70160416	70160416	+	Silent	SNP	G	G	T	rs775380271	.	GBM		TCGA-32-1977-01A-01D-1353-08	TCGA-32-1977-10C-01D-1353-08	G	G	.	.	.	.	.	.	.	.	.	.	.	.	.	.	.	c.1479G>T	p.%3D	p.V493V	ENST00000335568	6/6	194	160	34	175	175	0	UGT2B28,synonymous_variant,p.%3D,ENST00000335568,;UGT2B28,3_prime_UTR_variant,,ENST00000511240,;	T	ENSG00000135226
UGT2B28	0	.	GRCh37	4	70160487	70160487	+	Nonsense_Mutation	SNP	G	G	A	.	.	GBM		TCGA-32-1979-01A-01D-1696-08	TCGA-32-1979-10A-01D-1696-08	G	G	.	.	.	.	.	.	.	.	.	.	.	.	.	.	.	c.1550G>A	p.Trp517Ter	p.W517*	ENST00000335568	6/6	18	11	7	74	74	0	UGT2B28,stop_gained,p.Trp517Ter,ENST00000335568,;UGT2B28,3_prime_UTR_variant,,ENST00000511240,;	A	ENSG00000135226
UGT2B4	0	.	GRCh37	4	70361103	70361103	+	Silent	SNP	C	C	G	rs745701769	.	GBM		TCGA-06-0157-01A-01D-1491-08	TCGA-06-0157-10A-01D-1491-08	C	C	.	.	.	.	.	.	.	.	.	.	.	.	.	.	.	c.477G>C	p.%3D	p.L159L	ENST00000305107	1/6	57	37	20	64	64	0	UGT2B4,synonymous_variant,p.%3D,ENST00000305107,;UGT2B4,synonymous_variant,p.%3D,ENST00000512583,;UGT2B4,synonymous_variant,p.%3D,ENST00000381096,;UGT2B4,downstream_gene_variant,,ENST00000510114,;UGT2B4,splice_region_variant,,ENST00000506580,;UGT2B4,non_coding_transcript_exon_variant,,ENST00000502655,;UGT2B4,intron_variant,,ENST00000503836,;	G	ENSG00000156096
UGT2B4	0	.	GRCh37	4	70361046	70361046	+	Silent	SNP	G	G	A	rs370531105	.	GBM		TCGA-06-0187-01A-01D-1491-08	TCGA-06-0187-10B-01D-1491-08	G	G	.	.	.	.	.	.	.	.	.	.	.	.	.	.	.	c.534C>T	p.%3D	p.Y178Y	ENST00000305107	1/6	70	36	33	109	109	0	UGT2B4,synonymous_variant,p.%3D,ENST00000305107,;UGT2B4,synonymous_variant,p.%3D,ENST00000512583,;UGT2B4,synonymous_variant,p.%3D,ENST00000381096,;UGT2B4,downstream_gene_variant,,ENST00000510114,;UGT2B4,non_coding_transcript_exon_variant,,ENST00000502655,;UGT2B4,intron_variant,,ENST00000506580,;UGT2B4,intron_variant,,ENST00000503836,;	A	ENSG00000156096
UGT2B4	0	.	GRCh37	4	70359506	70359506	+	Nonsense_Mutation	SNP	G	G	A	rs774803544	.	GBM		TCGA-06-0189-01A-01D-1491-08	TCGA-06-0189-10A-01D-1491-08	G	G	.	.	.	.	.	.	.	.	.	.	.	.	.	.	.	c.775C>T	p.Arg259Ter	p.R259*	ENST00000305107	2/6	144	136	7	164	164	0	UGT2B4,stop_gained,p.Arg259Ter,ENST00000305107,;UGT2B4,stop_gained,p.Arg259Ter,ENST00000512583,;UGT2B4,stop_gained,p.Arg123Ter,ENST00000381096,;UGT2B4,downstream_gene_variant,,ENST00000510114,;UGT2B4,non_coding_transcript_exon_variant,,ENST00000506580,;UGT2B4,non_coding_transcript_exon_variant,,ENST00000503836,;UGT2B4,non_coding_transcript_exon_variant,,ENST00000502655,;	A	ENSG00000156096
UGT2B4	0	.	GRCh37	4	70361046	70361046	+	Silent	SNP	G	G	A	rs370531105	.	GBM		TCGA-06-0211-01B-01D-1491-08	TCGA-06-0211-10A-01D-1491-08	G	G	.	.	.	.	.	.	.	.	.	.	.	.	.	.	.	c.534C>T	p.%3D	p.Y178Y	ENST00000305107	1/6	127	70	57	138	138	0	UGT2B4,synonymous_variant,p.%3D,ENST00000305107,;UGT2B4,synonymous_variant,p.%3D,ENST00000512583,;UGT2B4,synonymous_variant,p.%3D,ENST00000381096,;UGT2B4,downstream_gene_variant,,ENST00000510114,;UGT2B4,non_coding_transcript_exon_variant,,ENST00000502655,;UGT2B4,intron_variant,,ENST00000506580,;UGT2B4,intron_variant,,ENST00000503836,;	A	ENSG00000156096
UGT2B4	0	.	GRCh37	4	70351106	70351106	+	Missense_Mutation	SNP	G	G	T	.	.	GBM		TCGA-06-0649-01B-01D-1492-08	TCGA-06-0649-10A-01D-1492-08	G	G	.	.	.	.	.	.	.	.	.	.	.	.	.	.	.	c.1130C>A	p.Ala377Asp	p.A377D	ENST00000305107	5/6	327	240	87	348	347	0	UGT2B4,missense_variant,p.Ala377Asp,ENST00000305107,;UGT2B4,missense_variant,p.Ala241Asp,ENST00000381096,;UGT2B4,intron_variant,,ENST00000512583,;UGT2B4,non_coding_transcript_exon_variant,,ENST00000502655,;UGT2B4,intron_variant,,ENST00000506580,;UGT2B4,downstream_gene_variant,,ENST00000503836,;	T	ENSG00000156096
UGT2B4	0	.	GRCh37	4	70346311	70346311	+	3'UTR	SNP	G	G	T	novel	.	GBM		TCGA-12-0773-01A-01W-0348-08	TCGA-12-0773-10A-01W-0348-08	G	G	.	.	.	.	.	.	.	.	.	.	.	.	.	.	.	c.*41C>A	.	.	ENST00000305107	6/6	252	155	96	421	421	0	UGT2B4,3_prime_UTR_variant,,ENST00000305107,;UGT2B4,3_prime_UTR_variant,,ENST00000512583,;UGT2B4,3_prime_UTR_variant,,ENST00000381096,;AC108078.1,downstream_gene_variant,,ENST00000583573,;UGT2B4,non_coding_transcript_exon_variant,,ENST00000506580,;UGT2B4,downstream_gene_variant,,ENST00000502655,;	T	ENSG00000156096
UGT2B4	0	.	GRCh37	4	70352357	70352357	+	Missense_Mutation	SNP	A	A	G	novel	.	GBM		TCGA-12-0775-01A-01W-0348-08	TCGA-12-0775-10A-01W-0348-08	A	A	.	.	.	.	.	.	.	.	.	.	.	.	.	.	.	c.1060T>C	p.Tyr354His	p.Y354H	ENST00000305107	4/6	1240	1107	132	678	677	1	UGT2B4,missense_variant,p.Tyr354His,ENST00000305107,;UGT2B4,missense_variant,p.Tyr354His,ENST00000512583,;UGT2B4,missense_variant,p.Tyr218His,ENST00000381096,;UGT2B4,non_coding_transcript_exon_variant,,ENST00000506580,;UGT2B4,non_coding_transcript_exon_variant,,ENST00000502655,;UGT2B4,downstream_gene_variant,,ENST00000503836,;	G	ENSG00000156096
UGT2B4	0	.	GRCh37	4	70351001	70351001	+	Missense_Mutation	SNP	G	G	A	rs773051968	.	GBM		TCGA-14-1395-01B-11D-1845-08	TCGA-14-1395-10A-01D-1845-08	G	G	.	.	.	.	.	.	.	.	.	.	.	.	.	.	.	c.1235C>T	p.Ala412Val	p.A412V	ENST00000305107	5/6	167	90	76	223	223	0	UGT2B4,missense_variant,p.Ala412Val,ENST00000305107,;UGT2B4,missense_variant,p.Ala276Val,ENST00000381096,;UGT2B4,intron_variant,,ENST00000512583,;UGT2B4,non_coding_transcript_exon_variant,,ENST00000502655,;UGT2B4,intron_variant,,ENST00000506580,;UGT2B4,downstream_gene_variant,,ENST00000503836,;	A	ENSG00000156096
UGT2B4	0	.	GRCh37	4	70361395	70361395	+	Missense_Mutation	SNP	A	A	C	novel	.	GBM		TCGA-15-1446-01A-01W-0611-08	TCGA-15-1446-10A-01W-0612-08	A	A	.	.	.	.	.	.	.	.	.	.	.	.	.	.	.	c.185T>G	p.Ile62Ser	p.I62S	ENST00000305107	1/6	319	266	52	471	471	0	UGT2B4,missense_variant,p.Ile62Ser,ENST00000305107,;UGT2B4,missense_variant,p.Ile62Ser,ENST00000512583,;UGT2B4,intron_variant,,ENST00000381096,;UGT2B4,downstream_gene_variant,,ENST00000510114,;UGT2B4,non_coding_transcript_exon_variant,,ENST00000506580,;UGT2B4,intron_variant,,ENST00000503836,;UGT2B4,intron_variant,,ENST00000502655,;	C	ENSG00000156096
UGT2B4	0	.	GRCh37	4	70352327	70352327	+	Missense_Mutation	SNP	C	C	T	novel	.	GBM		TCGA-16-0850-01A-01W-0424-08	TCGA-16-0850-10A-01W-0424-08	C	C	.	.	.	.	.	.	.	.	.	.	.	.	.	.	.	c.1090G>A	p.Gly364Ser	p.G364S	ENST00000305107	4/6	260	171	88	393	393	0	UGT2B4,missense_variant,p.Gly364Ser,ENST00000305107,;UGT2B4,missense_variant,p.Asp364Asn,ENST00000512583,;UGT2B4,missense_variant,p.Gly228Ser,ENST00000381096,;UGT2B4,splice_region_variant,,ENST00000506580,;UGT2B4,splice_region_variant,,ENST00000502655,;UGT2B4,downstream_gene_variant,,ENST00000503836,;	T	ENSG00000156096
UGT2B4	0	.	GRCh37	4	70361563	70361563	+	Missense_Mutation	SNP	G	G	A	.	.	GBM		TCGA-19-2623-01A-01D-1495-08	TCGA-19-2623-10A-01D-1495-08	G	G	.	.	.	.	.	.	.	.	.	.	.	.	.	.	.	c.17C>T	p.Thr6Ile	p.T6I	ENST00000305107	1/6	340	234	106	255	255	0	UGT2B4,missense_variant,p.Thr6Ile,ENST00000510114,;UGT2B4,missense_variant,p.Thr6Ile,ENST00000305107,;UGT2B4,missense_variant,p.Thr6Ile,ENST00000512583,;UGT2B4,intron_variant,,ENST00000381096,;UGT2B4,non_coding_transcript_exon_variant,,ENST00000506580,;UGT2B4,intron_variant,,ENST00000503836,;UGT2B4,intron_variant,,ENST00000502655,;	A	ENSG00000156096
UGT2B4	0	.	GRCh37	4	70346533	70346533	+	Missense_Mutation	SNP	C	C	T	.	.	GBM		TCGA-74-6577-01A-11D-1845-08	TCGA-74-6577-10A-01D-1845-08	C	C	.	.	.	.	.	.	.	.	.	.	.	.	.	.	.	c.1406G>A	p.Arg469His	p.R469H	ENST00000305107	6/6	185	142	43	200	200	0	UGT2B4,missense_variant,p.Arg469His,ENST00000305107,;UGT2B4,missense_variant,p.Arg333His,ENST00000381096,;UGT2B4,3_prime_UTR_variant,,ENST00000512583,;AC108078.1,downstream_gene_variant,,ENST00000583573,;UGT2B4,non_coding_transcript_exon_variant,,ENST00000506580,;UGT2B4,downstream_gene_variant,,ENST00000502655,;	T	ENSG00000156096
UGT2B4	0	.	GRCh37	4	70346348	70346348	+	3'UTR	SNP	G	G	A	novel	.	GBM		TCGA-87-5896-01A-01D-1696-08	TCGA-87-5896-10A-01D-1696-08	G	G	.	.	.	.	.	.	.	.	.	.	.	.	.	.	.	c.*4C>T	.	.	ENST00000305107	6/6	102	54	47	69	69	0	UGT2B4,3_prime_UTR_variant,,ENST00000305107,;UGT2B4,3_prime_UTR_variant,,ENST00000512583,;UGT2B4,3_prime_UTR_variant,,ENST00000381096,;AC108078.1,downstream_gene_variant,,ENST00000583573,;UGT2B4,non_coding_transcript_exon_variant,,ENST00000506580,;UGT2B4,downstream_gene_variant,,ENST00000502655,;	A	ENSG00000156096
UGT2B7	0	.	GRCh37	4	69962448	69962448	+	Silent	SNP	C	C	T	rs151180306	.	GBM		TCGA-06-0154-01A-03D-1491-08	TCGA-06-0154-10A-01D-1491-08	C	C	.	.	.	.	.	.	.	.	.	.	.	.	.	.	.	c.210C>T	p.%3D	p.S70S	ENST00000305231	1/6	193	139	54	214	214	0	UGT2B7,synonymous_variant,p.%3D,ENST00000305231,;UGT2B7,synonymous_variant,p.%3D,ENST00000508661,;UGT2B7,intron_variant,,ENST00000502942,;UGT2B7,intron_variant,,ENST00000509763,;	T	ENSG00000171234
UGT2B7	0	.	GRCh37	4	69962642	69962642	+	Missense_Mutation	SNP	A	A	T	.	.	GBM		TCGA-06-0649-01B-01D-1492-08	TCGA-06-0649-10A-01D-1492-08	A	A	.	.	.	.	.	.	.	.	.	.	.	.	.	.	.	c.404A>T	p.Lys135Ile	p.K135I	ENST00000305231	1/6	100	70	30	100	100	0	UGT2B7,missense_variant,p.Lys135Ile,ENST00000305231,;UGT2B7,missense_variant,p.Lys135Ile,ENST00000508661,;UGT2B7,intron_variant,,ENST00000502942,;UGT2B7,intron_variant,,ENST00000509763,;	T	ENSG00000171234
UGT2B7	0	.	GRCh37	4	69973993	69973993	+	Silent	SNP	G	G	A	rs775763044	.	GBM		TCGA-06-5418-01A-01D-1486-08	TCGA-06-5418-10A-01D-1486-08	G	G	.	.	.	.	.	.	.	.	.	.	.	.	.	.	.	c.1263G>A	p.%3D	p.S421S	ENST00000305231	5/6	255	169	85	346	345	1	UGT2B7,synonymous_variant,p.%3D,ENST00000305231,;UGT2B7,intron_variant,,ENST00000508661,;UGT2B7,downstream_gene_variant,,ENST00000502942,;UGT2B7,intron_variant,,ENST00000509763,;	A	ENSG00000171234
UGT2B7	0	.	GRCh37	4	69978432	69978432	+	Missense_Mutation	SNP	C	C	G	.	.	GBM		TCGA-74-6578-01A-11D-1845-08	TCGA-74-6578-10A-01D-1845-08	C	C	.	.	.	.	.	.	.	.	.	.	.	.	.	.	.	c.1568C>G	p.Ala523Gly	p.A523G	ENST00000305231	6/6	103	65	38	79	79	0	UGT2B7,missense_variant,p.Ala523Gly,ENST00000305231,;UGT2B7,3_prime_UTR_variant,,ENST00000508661,;UGT2B7,downstream_gene_variant,,ENST00000502942,;UGT2B7,downstream_gene_variant,,ENST00000509763,;	G	ENSG00000171234
UGT3A1	0	.	GRCh37	5	35954393	35954393	+	Missense_Mutation	SNP	G	G	T	rs749443207	.	GBM		TCGA-14-1795-01A-01W-0643-08	TCGA-14-1795-10A-01W-0643-08	G	G	.	.	.	.	.	.	.	.	.	.	.	.	.	.	.	c.1483C>A	p.Leu495Ile	p.L495I	ENST00000274278	7/7	62	27	35	47	47	0	UGT3A1,missense_variant,p.Leu495Ile,ENST00000274278,;UGT3A1,downstream_gene_variant,,ENST00000507113,;UGT3A1,downstream_gene_variant,,ENST00000503189,;UGT3A1,downstream_gene_variant,,ENST00000513233,;UGT3A1,3_prime_UTR_variant,,ENST00000515801,;	T	ENSG00000145626
UGT3A1	0	.	GRCh37	5	35955903	35955903	+	Missense_Mutation	SNP	C	C	T	rs375679556	.	GBM		TCGA-26-5135-01A-01D-1486-08	TCGA-26-5135-10A-01D-1486-08	C	C	.	.	.	.	.	.	.	.	.	.	.	.	.	.	.	c.1139G>A	p.Arg380His	p.R380H	ENST00000274278	6/7	233	145	88	212	212	0	UGT3A1,missense_variant,p.Arg380His,ENST00000274278,;UGT3A1,missense_variant,p.Arg346His,ENST00000507113,;UGT3A1,missense_variant,p.Arg380His,ENST00000503189,;UGT3A1,downstream_gene_variant,,ENST00000333811,;UGT3A1,non_coding_transcript_exon_variant,,ENST00000513233,;UGT3A1,3_prime_UTR_variant,,ENST00000515801,;	T	ENSG00000145626
UGT3A1	0	.	GRCh37	5	35957322	35957322	+	Missense_Mutation	SNP	A	A	G	rs141884785	.	GBM		TCGA-32-1977-01A-01D-1353-08	TCGA-32-1977-10C-01D-1353-08	A	A	.	.	.	.	.	.	.	.	.	.	.	.	.	.	.	c.1043T>C	p.Ile348Thr	p.I348T	ENST00000274278	5/7	90	72	17	87	86	0	UGT3A1,missense_variant,p.Ile348Thr,ENST00000274278,;UGT3A1,missense_variant,p.Ile314Thr,ENST00000507113,;UGT3A1,missense_variant,p.Ile348Thr,ENST00000503189,;UGT3A1,downstream_gene_variant,,ENST00000333811,;UGT3A1,non_coding_transcript_exon_variant,,ENST00000513233,;UGT3A1,3_prime_UTR_variant,,ENST00000515801,;	G	ENSG00000145626
UGT3A1	0	.	GRCh37	5	35988627	35988627	+	Missense_Mutation	SNP	G	G	A	rs201087553	.	GBM		TCGA-74-6575-01A-11D-1845-08	TCGA-74-6575-10A-01D-1845-08	G	G	.	.	.	.	.	.	.	.	.	.	.	.	.	.	.	c.121C>T	p.Arg41Trp	p.R41W	ENST00000274278	2/7	35	17	17	60	60	0	UGT3A1,missense_variant,p.Arg41Trp,ENST00000274278,;UGT3A1,missense_variant,p.Arg41Trp,ENST00000503189,;UGT3A1,5_prime_UTR_variant,,ENST00000333811,;UGT3A1,intron_variant,,ENST00000507113,;UGT3A1,intron_variant,,ENST00000513233,;UGT3A1,3_prime_UTR_variant,,ENST00000515801,;	A	ENSG00000145626
UGT3A2	0	.	GRCh37	5	36048994	36048994	+	Silent	SNP	T	T	C	.	.	GBM		TCGA-02-2483-01A-01D-1494-08	TCGA-02-2483-10A-01D-1494-08	T	T	.	.	.	.	.	.	.	.	.	.	.	.	.	.	.	c.840A>G	p.%3D	p.P280P	ENST00000282507	4/7	96	92	4	103	103	0	UGT3A2,synonymous_variant,p.%3D,ENST00000513300,;UGT3A2,synonymous_variant,p.%3D,ENST00000282507,;UGT3A2,intron_variant,,ENST00000545528,;UGT3A2,downstream_gene_variant,,ENST00000515131,;UGT3A2,intron_variant,,ENST00000504954,;UGT3A2,intron_variant,,ENST00000504685,;	C	ENSG00000168671
UGT3A2	0	.	GRCh37	5	36035828	36035828	+	Missense_Mutation	SNP	C	C	T	rs138640717	.	GBM		TCGA-06-0125-01A-01D-1490-08	TCGA-06-0125-10A-01D-1490-08	C	C	.	.	.	.	.	.	.	.	.	.	.	.	.	.	.	c.1544G>A	p.Arg515His	p.R515H	ENST00000282507	7/7	44	29	15	54	54	0	UGT3A2,missense_variant,p.Arg481His,ENST00000513300,;UGT3A2,missense_variant,p.Arg213His,ENST00000545528,;UGT3A2,missense_variant,p.Arg515His,ENST00000282507,;UGT3A2,downstream_gene_variant,,ENST00000504954,;UGT3A2,3_prime_UTR_variant,,ENST00000504685,;	T	ENSG00000168671
UGT3A2	0	.	GRCh37	5	36035966	36035966	+	Missense_Mutation	SNP	G	G	A	rs199567567	.	GBM		TCGA-06-0137-01A-01D-1490-08	TCGA-06-0137-10A-01D-1490-08	G	G	.	.	.	.	.	.	.	.	.	.	.	.	.	.	.	c.1406C>T	p.Thr469Met	p.T469M	ENST00000282507	7/7	47	28	19	63	63	0	UGT3A2,missense_variant,p.Thr435Met,ENST00000513300,;UGT3A2,missense_variant,p.Thr167Met,ENST00000545528,;UGT3A2,missense_variant,p.Thr469Met,ENST00000282507,;UGT3A2,downstream_gene_variant,,ENST00000504954,;UGT3A2,3_prime_UTR_variant,,ENST00000504685,;	A	ENSG00000168671
UGT3A2	0	.	GRCh37	5	36035911	36035911	+	Silent	SNP	G	G	A	rs141834822	.	GBM		TCGA-19-1786-01A-01W-0643-08	TCGA-19-1786-10A-01W-0643-08	G	G	.	.	.	.	.	.	.	.	.	.	.	.	.	.	.	c.1461C>T	p.%3D	p.D487D	ENST00000282507	7/7	52	44	8	43	43	0	UGT3A2,synonymous_variant,p.%3D,ENST00000513300,;UGT3A2,synonymous_variant,p.%3D,ENST00000545528,;UGT3A2,synonymous_variant,p.%3D,ENST00000282507,;UGT3A2,downstream_gene_variant,,ENST00000504954,;UGT3A2,3_prime_UTR_variant,,ENST00000504685,;	A	ENSG00000168671
UGT3A2	0	.	GRCh37	5	36035988	36035988	+	Missense_Mutation	SNP	C	C	T	rs545963580	.	GBM		TCGA-19-5959-01A-11D-1696-08	TCGA-19-5959-10A-01D-1696-08	C	C	.	.	.	.	.	.	.	.	.	.	.	.	.	.	.	c.1384G>A	p.Val462Ile	p.V462I	ENST00000282507	7/7	32	19	12	23	23	0	UGT3A2,missense_variant,p.Val428Ile,ENST00000513300,;UGT3A2,missense_variant,p.Val160Ile,ENST00000545528,;UGT3A2,missense_variant,p.Val462Ile,ENST00000282507,;UGT3A2,downstream_gene_variant,,ENST00000504954,;UGT3A2,3_prime_UTR_variant,,ENST00000504685,;	T	ENSG00000168671
UGT3A2	0	.	GRCh37	5	36035914	36035914	+	Silent	SNP	G	G	A	rs762343800	.	GBM		TCGA-27-2528-01A-01D-1494-08	TCGA-27-2528-10A-01D-1494-08	G	G	.	.	.	.	.	.	.	.	.	.	.	.	.	.	.	c.1458C>T	p.%3D	p.L486L	ENST00000282507	7/7	66	36	30	63	63	0	UGT3A2,synonymous_variant,p.%3D,ENST00000513300,;UGT3A2,synonymous_variant,p.%3D,ENST00000545528,;UGT3A2,synonymous_variant,p.%3D,ENST00000282507,;UGT3A2,downstream_gene_variant,,ENST00000504954,;UGT3A2,3_prime_UTR_variant,,ENST00000504685,;	A	ENSG00000168671
UGT3A2	0	.	GRCh37	5	36038103	36038103	+	Missense_Mutation	SNP	C	C	T	rs375117011	.	GBM		TCGA-28-5213-01A-01D-1486-08	TCGA-28-5213-10A-01D-1486-08	C	C	.	.	.	.	.	.	.	.	.	.	.	.	.	.	.	c.1091G>A	p.Arg364His	p.R364H	ENST00000282507	6/7	159	132	27	145	144	0	UGT3A2,missense_variant,p.Arg330His,ENST00000513300,;UGT3A2,missense_variant,p.Arg62His,ENST00000545528,;UGT3A2,missense_variant,p.Arg364His,ENST00000282507,;UGT3A2,downstream_gene_variant,,ENST00000504954,;UGT3A2,3_prime_UTR_variant,,ENST00000504685,;	T	ENSG00000168671
UGT3A2	0	.	GRCh37	5	36036029	36036029	+	Missense_Mutation	SNP	G	G	A	rs772287712	.	GBM		TCGA-32-1979-01A-01D-1696-08	TCGA-32-1979-10A-01D-1696-08	G	G	.	.	.	.	.	.	.	.	.	.	.	.	.	.	.	c.1343C>T	p.Pro448Leu	p.P448L	ENST00000282507	7/7	46	35	11	37	37	0	UGT3A2,missense_variant,p.Pro414Leu,ENST00000513300,;UGT3A2,missense_variant,p.Pro146Leu,ENST00000545528,;UGT3A2,missense_variant,p.Pro448Leu,ENST00000282507,;UGT3A2,downstream_gene_variant,,ENST00000504954,;UGT3A2,3_prime_UTR_variant,,ENST00000504685,;	A	ENSG00000168671
UGT3A2	0	.	GRCh37	5	36035762	36035762	+	3'UTR	SNP	C	C	T	rs369324623	.	GBM		TCGA-32-5222-01A-01D-1486-08	TCGA-32-5222-10A-01D-1486-08	C	C	.	.	.	.	.	.	.	.	.	.	.	.	.	.	.	c.*38G>A	.	.	ENST00000282507	7/7	91	58	33	84	84	0	UGT3A2,3_prime_UTR_variant,,ENST00000513300,;UGT3A2,3_prime_UTR_variant,,ENST00000545528,;UGT3A2,3_prime_UTR_variant,,ENST00000282507,;UGT3A2,downstream_gene_variant,,ENST00000504954,;UGT3A2,3_prime_UTR_variant,,ENST00000504685,;	T	ENSG00000168671
UGT8	0	.	GRCh37	4	115544417	115544417	+	Silent	SNP	G	G	A	novel	.	GBM		TCGA-06-1805-01A-01W-0643-08	TCGA-06-1805-10A-01W-0644-08	G	G	.	.	.	.	.	.	.	.	.	.	.	.	.	.	.	c.381G>A	p.%3D	p.L127L	ENST00000310836	2/6	77	46	31	253	253	0	UGT8,synonymous_variant,p.%3D,ENST00000507710,;UGT8,synonymous_variant,p.%3D,ENST00000310836,;UGT8,synonymous_variant,p.%3D,ENST00000394511,;	A	ENSG00000174607
UGT8	0	.	GRCh37	4	115544445	115544445	+	Missense_Mutation	SNP	G	G	C	.	.	GBM		TCGA-06-6700-01A-12D-1845-08	TCGA-06-6700-10A-01D-1845-08	G	G	.	.	.	.	.	.	.	.	.	.	.	.	.	.	.	c.409G>C	p.Val137Leu	p.V137L	ENST00000310836	2/6	115	91	24	121	121	0	UGT8,missense_variant,p.Val137Leu,ENST00000507710,;UGT8,missense_variant,p.Val137Leu,ENST00000310836,;UGT8,missense_variant,p.Val137Leu,ENST00000394511,;	C	ENSG00000174607
UGT8	0	.	GRCh37	4	115544782	115544782	+	Missense_Mutation	SNP	A	A	G	novel	.	GBM		TCGA-12-0829-01A-01W-0424-08	TCGA-12-0829-10A-01W-0424-08	A	A	.	.	.	.	.	.	.	.	.	.	.	.	.	.	.	c.746A>G	p.Glu249Gly	p.E249G	ENST00000310836	2/6	406	307	98	461	461	0	UGT8,missense_variant,p.Glu249Gly,ENST00000310836,;UGT8,missense_variant,p.Glu249Gly,ENST00000394511,;UGT8,downstream_gene_variant,,ENST00000507710,;	G	ENSG00000174607
UGT8	0	.	GRCh37	4	115597388	115597388	+	Missense_Mutation	SNP	C	C	T	.	.	GBM		TCGA-14-1037-01A-01W-0643-08	TCGA-14-1037-10B-01W-0644-08	C	C	.	.	.	.	.	.	.	.	.	.	.	.	.	.	.	c.1570C>T	p.Leu524Phe	p.L524F	ENST00000310836	6/6	294	214	80	315	315	0	UGT8,missense_variant,p.Leu524Phe,ENST00000310836,;UGT8,missense_variant,p.Leu524Phe,ENST00000394511,;	T	ENSG00000174607
[truncated: 66 more columns]

[truncated: 27 more sheets: HNSC, KICH, KIRC, KIRP, LAML, LGG, LIHC, LUAD, LUSC, MESO, OV, PCPG, PAAD, PRAD, READ, SARC, SKCM primary, SKCM metastatic, STAD, TGCT …]
