# Supplementary material for: The Somatic Mutation Landscape of UDP-Glycosyltransferase (UGT) Genes in Human Cancers
Source: Cancers (Basel). 2022 Nov 21;14(22):5708. doi: 10.3390/cancers14225708 (PMC9688768; doi:10.3390/cancers14225708)
Supplement: Supplementary file 1 [file cancers-14-05708-s001.zip › Table S4.xlsx]

## Sheet: Title 
Table S4: Somatic mutations in TCGA tumors for each of the 22 UGT genes.

## Sheet: raw list from MC3
Hugo_Symbol	Entrez_Gene_Id	Center	NCBI_Build	Chromosome	Start_Position	End_Position	Strand	Variant_Classification	Variant_Type	Reference_Allele	Tumor_Seq_Allele1	Tumor_Seq_Allele2	dbSNP_RS	dbSNP_Val_Status	TCGA Cancer type		Tumor_Sample_Barcode	Matched_Norm_Sample_Barcode	Match_Norm_Seq_Allele1	Match_Norm_Seq_Allele2	Tumor_Validation_Allele1	Tumor_Validation_Allele2	Match_Norm_Validation_Allele1	Match_Norm_Validation_Allele2	Verification_Status	Validation_Status	Mutation_Status	Sequencing_Phase	Sequence_Source	Validation_Method	Score	BAM_File	Sequencer	Tumor_Sample_UUID	Matched_Norm_Sample_UUID	HGVSc	HGVSp	HGVSp_Short	Transcript_ID	Exon_Number	t_depth	t_ref_count	t_alt_count	n_depth	n_ref_count	n_alt_count	all_effects	Allele	Gene
UGT1A1	0	.	GRCh37	2	234668924	234668924	+	5'UTR	SNP	C	C	A	novel	.	HNSC		TCGA-D6-6823-01A-11D-1912-08	TCGA-D6-6823-10A-01D-1912-08	C	C	.	.	.	.	.	.	.	.	.	.	.	.	.	.	.	c.-10C>A	.	.	ENST00000305208	1/5	36	32	4	22	22	0	UGT1A1,5_prime_UTR_variant,,ENST00000305208,;UGT1A10,intron_variant,,ENST00000373445,;UGT1A4,intron_variant,,ENST00000373409,;UGT1A6,intron_variant,,ENST00000305139,;UGT1A3,intron_variant,,ENST00000482026,;UGT1A6,intron_variant,,ENST00000373424,;UGT1A8,intron_variant,,ENST00000608381,;UGT1A7,intron_variant,,ENST00000373426,;UGT1A8,intron_variant,,ENST00000609637,;UGT1A8,intron_variant,,ENST000006…	A	ENSG00000242366
UGT1A1	0	.	GRCh37	2	234668931	234668931	+	5'UTR	SNP	G	G	A	rs376515645	.	PRAD		TCGA-J9-A52C-01A-11D-A26M-08	TCGA-J9-A52C-10A-01D-A26K-08	G	G	.	.	.	.	.	.	.	.	.	.	.	.	.	.	.	c.-3G>A	.	.	ENST00000305208	1/5	34	31	3	23	23	0	UGT1A1,5_prime_UTR_variant,,ENST00000305208,;UGT1A10,intron_variant,,ENST00000373445,;UGT1A4,intron_variant,,ENST00000373409,;UGT1A6,intron_variant,,ENST00000305139,;UGT1A3,intron_variant,,ENST00000482026,;UGT1A6,intron_variant,,ENST00000373424,;UGT1A8,intron_variant,,ENST00000608381,;UGT1A7,intron_variant,,ENST00000373426,;UGT1A8,intron_variant,,ENST00000609637,;UGT1A8,intron_variant,,ENST000006…	A	ENSG00000242366
UGT1A10	0	.	GRCh37	2	234652280	234652280	+	Intron	SNP	C	C	T	rs776464072	.	BLCA		TCGA-DK-A2I1-01A-11D-A17V-08	TCGA-DK-A2I1-10A-01D-A17V-08	C	C	.	.	.	.	.	.	.	.	.	.	.	.	.	.	.	c.856-23400C>T	.	.	ENST00000344644	.	77	58	19	142	142	0	UGT1A10,intron_variant,,ENST00000373445,;UGT1A4,intron_variant,,ENST00000373409,;UGT1A6,intron_variant,,ENST00000305139,;UGT1A3,intron_variant,,ENST00000482026,;UGT1A6,intron_variant,,ENST00000373424,;UGT1A8,intron_variant,,ENST00000608381,;UGT1A7,intron_variant,,ENST00000373426,;UGT1A8,intron_variant,,ENST00000609637,;UGT1A8,intron_variant,,ENST00000609767,;UGT1A5,intron_variant,,ENST00000373414…	T	ENSG00000242515
UGT1A10	0	.	GRCh37	2	234545564	234545564	+	Missense_Mutation	SNP	A	A	T	novel	.	BLCA		TCGA-E7-A541-01A-11D-A26M-08	TCGA-E7-A541-10A-01D-A26K-08	A	A	.	.	.	.	.	.	.	.	.	.	.	.	.	.	.	c.396A>T	p.Lys132Asn	p.K132N	ENST00000344644	1/5	56	51	5	87	87	0	UGT1A10,missense_variant,p.Lys132Asn,ENST00000373445,;UGT1A10,missense_variant,p.Lys132Asn,ENST00000344644,;UGT1A8,intron_variant,,ENST00000373450,;	T	ENSG00000242515
UGT1A10	0	.	GRCh37	2	234676526	234676526	+	Missense_Mutation	SNP	C	C	T	rs144978321	.	BLCA		TCGA-FD-A3N6-01A-11D-A21A-08	TCGA-FD-A3N6-10A-01D-A21A-08	C	C	.	.	.	.	.	.	.	.	.	.	.	.	.	.	.	c.1019C>T	p.Ser340Leu	p.S340L	ENST00000344644	3/5	246	144	101	133	133	0	UGT1A10,missense_variant,p.Ser340Leu,ENST00000373445,;UGT1A4,missense_variant,p.Ser344Leu,ENST00000373409,;UGT1A6,missense_variant,p.Ser342Leu,ENST00000305139,;UGT1A3,missense_variant,p.Ser344Leu,ENST00000482026,;UGT1A6,missense_variant,p.Ser75Leu,ENST00000373424,;UGT1A8,missense_variant,p.Ser343Leu,ENST00000608383,;UGT1A8,missense_variant,p.Ser344Leu,ENST00000608381,;UGT1A7,missense_variant,p.Se…	T	ENSG00000242515
UGT1A10	0	.	GRCh37	2	234545237	234545237	+	Silent	SNP	C	C	T	rs538561016	.	BLCA		TCGA-FD-A3SQ-01A-21D-A22Z-08	TCGA-FD-A3SQ-10A-01D-A22Z-08	C	C	.	.	.	.	.	.	.	.	.	.	.	.	.	.	.	c.69C>T	p.%3D	p.A23A	ENST00000344644	1/5	119	93	26	169	169	0	UGT1A10,synonymous_variant,p.%3D,ENST00000373445,;UGT1A10,synonymous_variant,p.%3D,ENST00000344644,;UGT1A8,intron_variant,,ENST00000373450,;	T	ENSG00000242515
UGT1A10	0	.	GRCh37	2	234545740	234545740	+	Missense_Mutation	SNP	C	C	T	novel	.	BLCA		TCGA-FD-A5C1-01A-11D-A289-08	TCGA-FD-A5C1-10A-01D-A289-08	C	C	.	.	.	.	.	.	.	.	.	.	.	.	.	.	.	c.572C>T	p.Pro191Leu	p.P191L	ENST00000344644	1/5	185	170	15	179	179	0	UGT1A10,missense_variant,p.Pro191Leu,ENST00000373445,;UGT1A10,missense_variant,p.Pro191Leu,ENST00000344644,;UGT1A8,intron_variant,,ENST00000373450,;	T	ENSG00000242515
UGT1A10	0	.	GRCh37	2	234545152	234545152	+	5'UTR	SNP	C	C	T	rs761750698	.	BLCA		TCGA-FD-A6TI-01A-11D-A32B-08	TCGA-FD-A6TI-10A-01D-A329-08	C	C	.	.	.	.	.	.	.	.	.	.	.	.	.	.	.	c.-17C>T	.	.	ENST00000344644	1/5	42	36	5	60	60	0	UGT1A10,5_prime_UTR_variant,,ENST00000373445,;UGT1A10,5_prime_UTR_variant,,ENST00000344644,;UGT1A8,intron_variant,,ENST00000373450,;	T	ENSG00000242515
UGT1A10	0	.	GRCh37	2	234545777	234545777	+	Missense_Mutation	SNP	C	C	G	novel	.	BLCA		TCGA-G2-AA3B-01A-11D-A391-08	TCGA-G2-AA3B-10A-01D-A394-08	C	C	.	.	.	.	.	.	.	.	.	.	.	.	.	.	.	c.609C>G	p.Phe203Leu	p.F203L	ENST00000344644	1/5	163	138	25	196	195	0	UGT1A10,missense_variant,p.Phe203Leu,ENST00000373445,;UGT1A10,missense_variant,p.Phe203Leu,ENST00000344644,;UGT1A8,intron_variant,,ENST00000373450,;	G	ENSG00000242515
UGT1A10	0	.	GRCh37	2	234545483	234545483	+	Silent	SNP	A	A	C	rs45580232	.	BLCA		TCGA-GC-A3RC-01A-11D-A22Z-08	TCGA-GC-A3RC-10B-01D-A22Z-08	A	A	.	.	.	.	.	.	.	.	.	.	.	.	.	.	.	c.315A>C	p.%3D	p.I105I	ENST00000344644	1/5	91	73	18	127	127	0	UGT1A10,synonymous_variant,p.%3D,ENST00000373445,;UGT1A10,synonymous_variant,p.%3D,ENST00000344644,;UGT1A8,intron_variant,,ENST00000373450,;	C	ENSG00000242515
UGT1A10	0	.	GRCh37	2	234652349	234652349	+	Intron	SNP	C	C	A	rs200396442	.	BLCA		TCGA-HQ-A2OF-01A-11D-A26M-08	TCGA-HQ-A2OF-10B-01D-A26K-08	C	C	.	.	.	.	.	.	.	.	.	.	.	.	.	.	.	c.856-23331C>A	.	.	ENST00000344644	.	268	199	68	177	177	0	UGT1A10,intron_variant,,ENST00000373445,;UGT1A4,intron_variant,,ENST00000373409,;UGT1A6,intron_variant,,ENST00000305139,;UGT1A3,intron_variant,,ENST00000482026,;UGT1A6,intron_variant,,ENST00000373424,;UGT1A8,intron_variant,,ENST00000608381,;UGT1A7,intron_variant,,ENST00000373426,;UGT1A8,intron_variant,,ENST00000609637,;UGT1A8,intron_variant,,ENST00000609767,;UGT1A5,intron_variant,,ENST00000373414…	A	ENSG00000242515
UGT1A10	0	.	GRCh37	2	234676536	234676536	+	Silent	SNP	G	G	T	rs770433443	.	BLCA		TCGA-KQ-A41N-01A-11D-A339-08	TCGA-KQ-A41N-10D-01D-A339-08	G	G	.	.	.	.	.	.	.	.	.	.	.	.	.	.	.	c.1029G>T	p.%3D	p.A343A	ENST00000344644	3/5	87	78	9	77	77	0	UGT1A10,synonymous_variant,p.%3D,ENST00000373445,;UGT1A4,synonymous_variant,p.%3D,ENST00000373409,;UGT1A6,synonymous_variant,p.%3D,ENST00000305139,;UGT1A3,synonymous_variant,p.%3D,ENST00000482026,;UGT1A6,synonymous_variant,p.%3D,ENST00000373424,;UGT1A8,synonymous_variant,p.%3D,ENST00000608383,;UGT1A8,synonymous_variant,p.%3D,ENST00000608381,;UGT1A7,synonymous_variant,p.%3D,ENST00000373426,;UGT1A8…	T	ENSG00000242515
UGT1A10	0	.	GRCh37	2	234545662	234545662	+	Missense_Mutation	SNP	C	C	G	novel	.	BLCA		TCGA-MV-A51V-01A-11D-A26M-08	TCGA-MV-A51V-10A-01D-A26K-08	C	C	.	.	.	.	.	.	.	.	.	.	.	.	.	.	.	c.494C>G	p.Ser165Cys	p.S165C	ENST00000344644	1/5	109	77	32	78	78	0	UGT1A10,missense_variant,p.Ser165Cys,ENST00000373445,;UGT1A10,missense_variant,p.Ser165Cys,ENST00000344644,;UGT1A8,intron_variant,,ENST00000373450,;	G	ENSG00000242515
UGT1A10	0	.	GRCh37	2	234652578	234652578	+	Intron	SNP	C	C	A	novel	.	BLCA		TCGA-UY-A9PF-01A-11D-A38G-08	TCGA-UY-A9PF-10A-01D-A38J-08	C	C	.	.	.	.	.	.	.	.	.	.	.	.	.	.	.	c.856-23102C>A	.	.	ENST00000344644	.	35	26	9	30	30	0	UGT1A10,intron_variant,,ENST00000373445,;UGT1A4,intron_variant,,ENST00000373409,;UGT1A6,intron_variant,,ENST00000305139,;UGT1A3,intron_variant,,ENST00000482026,;UGT1A6,intron_variant,,ENST00000373424,;UGT1A8,intron_variant,,ENST00000608381,;UGT1A7,intron_variant,,ENST00000373426,;UGT1A8,intron_variant,,ENST00000609637,;UGT1A8,intron_variant,,ENST00000609767,;UGT1A5,intron_variant,,ENST00000373414…	A	ENSG00000242515
UGT1A10	0	.	GRCh37	2	234678270	234678270	+	Intron	SNP	G	G	T	novel	.	BLCA		TCGA-XF-A9T5-01A-11D-A42E-08	TCGA-XF-A9T5-10A-01D-A42H-08	G	G	.	.	.	.	.	.	.	.	.	.	.	.	.	.	.	c.1295+1185G>T	.	.	ENST00000344644	.	13	10	3	11	11	0	UGT1A10,3_prime_UTR_variant,,ENST00000373445,;UGT1A8,3_prime_UTR_variant,,ENST00000360418,;UGT1A6,3_prime_UTR_variant,,ENST00000406651,;UGT1A4,intron_variant,,ENST00000373409,;UGT1A6,intron_variant,,ENST00000305139,;UGT1A3,intron_variant,,ENST00000482026,;UGT1A6,intron_variant,,ENST00000373424,;UGT1A8,intron_variant,,ENST00000608383,;UGT1A8,intron_variant,,ENST00000608381,;UGT1A7,intron_variant,,…	T	ENSG00000242515
UGT1A10	0	.	GRCh37	2	234545378	234545378	+	Silent	SNP	G	G	A	novel	.	BLCA		TCGA-YC-A89H-01A-11D-A364-08	TCGA-YC-A89H-10A-01D-A362-08	G	G	.	.	.	.	.	.	.	.	.	.	.	.	.	.	.	c.210G>A	p.%3D	p.L70L	ENST00000344644	1/5	107	76	31	118	118	0	UGT1A10,synonymous_variant,p.%3D,ENST00000373445,;UGT1A10,synonymous_variant,p.%3D,ENST00000344644,;UGT1A8,intron_variant,,ENST00000373450,;	A	ENSG00000242515
UGT1A10	0	.	GRCh37	2	234545731	234545731	+	Missense_Mutation	SNP	C	C	T	.	.	BLCA		TCGA-YC-A89H-01A-11D-A364-08	TCGA-YC-A89H-10A-01D-A362-08	C	C	.	.	.	.	.	.	.	.	.	.	.	.	.	.	.	c.563C>T	p.Ser188Phe	p.S188F	ENST00000344644	1/5	195	130	64	221	221	0	UGT1A10,missense_variant,p.Ser188Phe,ENST00000373445,;UGT1A10,missense_variant,p.Ser188Phe,ENST00000344644,;UGT1A8,intron_variant,,ENST00000373450,;	T	ENSG00000242515
UGT1A10	0	.	GRCh37	2	234545946	234545946	+	Missense_Mutation	SNP	G	G	A	novel	.	BLCA		TCGA-YC-A89H-01A-11D-A364-08	TCGA-YC-A89H-10A-01D-A362-08	G	G	.	.	.	.	.	.	.	.	.	.	.	.	.	.	.	c.778G>A	p.Asp260Asn	p.D260N	ENST00000344644	1/5	287	201	85	353	353	0	UGT1A10,missense_variant,p.Asp260Asn,ENST00000373445,;UGT1A10,missense_variant,p.Asp260Asn,ENST00000344644,;UGT1A8,intron_variant,,ENST00000373450,;	A	ENSG00000242515
UGT1A10	0	.	GRCh37	2	234546003	234546003	+	Nonsense_Mutation	SNP	C	C	T	novel	.	BLCA		TCGA-YC-A89H-01A-11D-A364-08	TCGA-YC-A89H-10A-01D-A362-08	C	C	.	.	.	.	.	.	.	.	.	.	.	.	.	.	.	c.835C>T	p.Gln279Ter	p.Q279*	ENST00000344644	1/5	246	169	77	323	323	0	UGT1A10,stop_gained,p.Gln279Ter,ENST00000373445,;UGT1A10,stop_gained,p.Gln279Ter,ENST00000344644,;UGT1A8,intron_variant,,ENST00000373450,;	T	ENSG00000242515
UGT1A10	0	.	GRCh37	2	234652506	234652506	+	Intron	SNP	G	G	A	novel	.	BLCA		TCGA-ZF-A9RL-01A-11D-A38G-08	TCGA-ZF-A9RL-10A-01D-A38J-08	G	G	.	.	.	.	.	.	.	.	.	.	.	.	.	.	.	c.856-23174G>A	.	.	ENST00000344644	.	95	73	22	86	86	0	UGT1A10,intron_variant,,ENST00000373445,;UGT1A4,intron_variant,,ENST00000373409,;UGT1A6,intron_variant,,ENST00000305139,;UGT1A3,intron_variant,,ENST00000482026,;UGT1A6,intron_variant,,ENST00000373424,;UGT1A8,intron_variant,,ENST00000608381,;UGT1A7,intron_variant,,ENST00000373426,;UGT1A8,intron_variant,,ENST00000609637,;UGT1A8,intron_variant,,ENST00000609767,;UGT1A5,intron_variant,,ENST00000373414…	A	ENSG00000242515
UGT1A10	0	.	GRCh37	2	234676951	234676951	+	Missense_Mutation	SNP	G	G	A	novel	.	BLCA		TCGA-ZF-AA4V-01A-11D-A38G-08	TCGA-ZF-AA4V-10A-01D-A38J-08	G	G	.	.	.	.	.	.	.	.	.	.	.	.	.	.	.	c.1161G>A	p.Met387Ile	p.M387I	ENST00000344644	4/5	93	58	35	143	143	0	UGT1A10,missense_variant,p.Met387Ile,ENST00000373445,;UGT1A4,missense_variant,p.Met391Ile,ENST00000373409,;UGT1A6,missense_variant,p.Met389Ile,ENST00000305139,;UGT1A3,missense_variant,p.Met391Ile,ENST00000482026,;UGT1A6,missense_variant,p.Met122Ile,ENST00000373424,;UGT1A8,missense_variant,p.Met390Ile,ENST00000608383,;UGT1A8,missense_variant,p.Met391Ile,ENST00000608381,;UGT1A7,missense_variant,p.M…	A	ENSG00000242515
UGT1A10	0	.	GRCh37	2	234676964	234676964	+	Missense_Mutation	SNP	G	G	T	.	.	BRCA		TCGA-A7-A13D-01A-13D-A272-09	TCGA-A7-A13D-10A-02D-A272-09	G	G	.	.	.	.	.	.	.	.	.	.	.	.	.	.	.	c.1174G>T	p.Gly392Cys	p.G392C	ENST00000344644	4/5	48	44	4	92	92	0	UGT1A10,missense_variant,p.Gly392Cys,ENST00000373445,;UGT1A4,missense_variant,p.Gly396Cys,ENST00000373409,;UGT1A6,missense_variant,p.Gly394Cys,ENST00000305139,;UGT1A3,missense_variant,p.Gly396Cys,ENST00000482026,;UGT1A6,missense_variant,p.Gly127Cys,ENST00000373424,;UGT1A8,missense_variant,p.Gly395Cys,ENST00000608383,;UGT1A8,missense_variant,p.Gly396Cys,ENST00000608381,;UGT1A7,missense_variant,p.G…	T	ENSG00000242515
UGT1A10	0	.	GRCh37	2	234676965	234676965	+	Missense_Mutation	SNP	G	G	T	rs367897068	.	BRCA		TCGA-A7-A13D-01A-13D-A272-09	TCGA-A7-A13D-10A-02D-A272-09	G	G	.	.	.	.	.	.	.	.	.	.	.	.	.	.	.	c.1175G>T	p.Gly392Val	p.G392V	ENST00000344644	4/5	48	44	4	92	92	0	UGT1A10,missense_variant,p.Gly392Val,ENST00000373445,;UGT1A4,missense_variant,p.Gly396Val,ENST00000373409,;UGT1A6,missense_variant,p.Gly394Val,ENST00000305139,;UGT1A3,missense_variant,p.Gly396Val,ENST00000482026,;UGT1A6,missense_variant,p.Gly127Val,ENST00000373424,;UGT1A8,missense_variant,p.Gly395Val,ENST00000608383,;UGT1A8,missense_variant,p.Gly396Val,ENST00000608381,;UGT1A7,missense_variant,p.G…	T	ENSG00000242515
UGT1A10	0	.	GRCh37	2	234652393	234652393	+	Intron	SNP	G	G	A	rs370175895	.	BRCA		TCGA-AC-A23H-01A-11D-A159-09	TCGA-AC-A23H-11A-12D-A17G-09	G	G	.	.	.	.	.	.	.	.	.	.	.	.	.	.	.	c.856-23287G>A	.	.	ENST00000344644	.	39	29	10	31	31	0	UGT1A10,intron_variant,,ENST00000373445,;UGT1A4,intron_variant,,ENST00000373409,;UGT1A6,intron_variant,,ENST00000305139,;UGT1A3,intron_variant,,ENST00000482026,;UGT1A6,intron_variant,,ENST00000373424,;UGT1A8,intron_variant,,ENST00000608381,;UGT1A7,intron_variant,,ENST00000373426,;UGT1A8,intron_variant,,ENST00000609637,;UGT1A8,intron_variant,,ENST00000609767,;UGT1A5,intron_variant,,ENST00000373414…	A	ENSG00000242515
UGT1A10	0	.	GRCh37	2	234676536	234676536	+	Silent	SNP	G	G	A	rs770433443	.	BRCA		TCGA-AN-A046-01A-21W-A050-09	TCGA-AN-A046-10A-01W-A055-09	G	G	.	.	.	.	.	.	.	.	.	.	.	.	.	.	.	c.1029G>A	p.%3D	p.A343A	ENST00000344644	3/5	282	246	36	410	410	0	UGT1A10,synonymous_variant,p.%3D,ENST00000373445,;UGT1A4,synonymous_variant,p.%3D,ENST00000373409,;UGT1A6,synonymous_variant,p.%3D,ENST00000305139,;UGT1A3,synonymous_variant,p.%3D,ENST00000482026,;UGT1A6,synonymous_variant,p.%3D,ENST00000373424,;UGT1A8,synonymous_variant,p.%3D,ENST00000608383,;UGT1A8,synonymous_variant,p.%3D,ENST00000608381,;UGT1A7,synonymous_variant,p.%3D,ENST00000373426,;UGT1A8…	A	ENSG00000242515
UGT1A10	0	.	GRCh37	2	234652358	234652358	+	Intron	SNP	C	C	A	novel	.	BRCA		TCGA-AN-A0AT-01A-11D-A045-09	TCGA-AN-A0AT-10A-01W-A055-09	C	C	.	.	.	.	.	.	.	.	.	.	.	.	.	.	.	c.856-23322C>A	.	.	ENST00000344644	.	46	32	14	54	54	0	UGT1A10,intron_variant,,ENST00000373445,;UGT1A4,intron_variant,,ENST00000373409,;UGT1A6,intron_variant,,ENST00000305139,;UGT1A3,intron_variant,,ENST00000482026,;UGT1A6,intron_variant,,ENST00000373424,;UGT1A8,intron_variant,,ENST00000608381,;UGT1A7,intron_variant,,ENST00000373426,;UGT1A8,intron_variant,,ENST00000609637,;UGT1A8,intron_variant,,ENST00000609767,;UGT1A5,intron_variant,,ENST00000373414…	A	ENSG00000242515
UGT1A10	0	.	GRCh37	2	234545725	234545725	+	Missense_Mutation	SNP	C	C	T	.	.	BRCA		TCGA-AR-A1AH-01A-11D-A12B-09	TCGA-AR-A1AH-10A-01D-A12B-09	C	C	.	.	.	.	.	.	.	.	.	.	.	.	.	.	.	c.557C>T	p.Pro186Leu	p.P186L	ENST00000344644	1/5	533	310	223	478	478	0	UGT1A10,missense_variant,p.Pro186Leu,ENST00000373445,;UGT1A10,missense_variant,p.Pro186Leu,ENST00000344644,;UGT1A8,intron_variant,,ENST00000373450,;	T	ENSG00000242515
UGT1A10	0	.	GRCh37	2	234652278	234652278	+	Intron	SNP	G	G	T	novel	.	BRCA		TCGA-AR-A1AR-01A-31D-A135-09	TCGA-AR-A1AR-10A-01D-A135-09	G	G	.	.	.	.	.	.	.	.	.	.	.	.	.	.	.	c.856-23402G>T	.	.	ENST00000344644	.	51	41	10	51	50	0	UGT1A10,intron_variant,,ENST00000373445,;UGT1A4,intron_variant,,ENST00000373409,;UGT1A6,intron_variant,,ENST00000305139,;UGT1A3,intron_variant,,ENST00000482026,;UGT1A6,intron_variant,,ENST00000373424,;UGT1A8,intron_variant,,ENST00000608381,;UGT1A7,intron_variant,,ENST00000373426,;UGT1A8,intron_variant,,ENST00000609637,;UGT1A8,intron_variant,,ENST00000609767,;UGT1A5,intron_variant,,ENST00000373414…	T	ENSG00000242515
UGT1A10	0	.	GRCh37	2	234545168	234545168	+	5'UTR	SNP	C	C	T	novel	.	BRCA		TCGA-B6-A0IK-01A-12W-A071-09	TCGA-B6-A0IK-10A-01W-A071-09	C	C	.	.	.	.	.	.	.	.	.	.	.	.	.	.	.	c.-1C>T	.	.	ENST00000344644	1/5	146	110	36	117	117	0	UGT1A10,5_prime_UTR_variant,,ENST00000373445,;UGT1A10,5_prime_UTR_variant,,ENST00000344644,;UGT1A8,intron_variant,,ENST00000373450,;	T	ENSG00000242515
UGT1A10	0	.	GRCh37	2	234652466	234652466	+	Intron	SNP	C	C	T	rs753368953	.	BRCA		TCGA-BH-A0H9-01A-11W-A071-09	TCGA-BH-A0H9-10A-01W-A071-09	C	C	.	.	.	.	.	.	.	.	.	.	.	.	.	.	.	c.856-23214C>T	.	.	ENST00000344644	.	48	30	17	84	84	0	UGT1A10,intron_variant,,ENST00000373445,;UGT1A4,intron_variant,,ENST00000373409,;UGT1A6,intron_variant,,ENST00000305139,;UGT1A3,intron_variant,,ENST00000482026,;UGT1A6,intron_variant,,ENST00000373424,;UGT1A8,intron_variant,,ENST00000608381,;UGT1A7,intron_variant,,ENST00000373426,;UGT1A8,intron_variant,,ENST00000609637,;UGT1A8,intron_variant,,ENST00000609767,;UGT1A5,intron_variant,,ENST00000373414…	T	ENSG00000242515
UGT1A10	0	.	GRCh37	2	234545248	234545248	+	Missense_Mutation	SNP	A	A	T	.	.	BRCA		TCGA-C8-A27A-01A-11D-A167-09	TCGA-C8-A27A-10B-01D-A167-09	A	A	.	.	.	.	.	.	.	.	.	.	.	.	.	.	.	c.80A>T	p.Lys27Met	p.K27M	ENST00000344644	1/5	85	71	13	69	69	0	UGT1A10,missense_variant,p.Lys27Met,ENST00000373445,;UGT1A10,missense_variant,p.Lys27Met,ENST00000344644,;UGT1A8,intron_variant,,ENST00000373450,;	T	ENSG00000242515
UGT1A10	0	.	GRCh37	2	234678346	234678346	+	Intron	SNP	T	T	G	novel	.	CESC		TCGA-FU-A3HZ-01A-11D-A20U-09	TCGA-FU-A3HZ-10A-01D-A20U-09	T	T	.	.	.	.	.	.	.	.	.	.	.	.	.	.	.	c.1295+1261T>G	.	.	ENST00000344644	.	20	14	6	32	31	0	UGT1A10,3_prime_UTR_variant,,ENST00000373445,;UGT1A8,3_prime_UTR_variant,,ENST00000360418,;UGT1A6,3_prime_UTR_variant,,ENST00000406651,;UGT1A4,intron_variant,,ENST00000373409,;UGT1A6,intron_variant,,ENST00000305139,;UGT1A3,intron_variant,,ENST00000482026,;UGT1A6,intron_variant,,ENST00000373424,;UGT1A8,intron_variant,,ENST00000608383,;UGT1A8,intron_variant,,ENST00000608381,;UGT1A7,intron_variant,,…	G	ENSG00000242515
UGT1A10	0	.	GRCh37	2	234545342	234545342	+	Silent	SNP	C	C	T	.	.	CESC		TCGA-FU-A5XV-01A-11D-A28B-09	TCGA-FU-A5XV-10A-01D-A28E-09	C	C	.	.	.	.	.	.	.	.	.	.	.	.	.	.	.	c.174C>T	p.%3D	p.V58V	ENST00000344644	1/5	149	96	52	104	104	0	UGT1A10,synonymous_variant,p.%3D,ENST00000373445,;UGT1A10,synonymous_variant,p.%3D,ENST00000344644,;UGT1A8,intron_variant,,ENST00000373450,;	T	ENSG00000242515
UGT1A10	0	.	GRCh37	2	234652345	234652345	+	Intron	SNP	G	G	A	rs780880081	.	CESC		TCGA-2W-A8YY-01A-11D-A37N-09	TCGA-2W-A8YY-10A-01D-A37N-09	G	G	.	.	.	.	.	.	.	.	.	.	.	.	.	.	.	c.856-23335G>A	.	.	ENST00000344644	.	75	66	8	78	78	0	UGT1A10,intron_variant,,ENST00000373445,;UGT1A4,intron_variant,,ENST00000373409,;UGT1A6,intron_variant,,ENST00000305139,;UGT1A3,intron_variant,,ENST00000482026,;UGT1A6,intron_variant,,ENST00000373424,;UGT1A8,intron_variant,,ENST00000608381,;UGT1A7,intron_variant,,ENST00000373426,;UGT1A8,intron_variant,,ENST00000609637,;UGT1A8,intron_variant,,ENST00000609767,;UGT1A5,intron_variant,,ENST00000373414…	A	ENSG00000242515
UGT1A10	0	.	GRCh37	2	234676989	234676989	+	Missense_Mutation	SNP	G	G	A	rs140613392	.	CESC		TCGA-2W-A8YY-01A-11D-A37N-09	TCGA-2W-A8YY-10A-01D-A37N-09	G	G	.	.	.	.	.	.	.	.	.	.	.	.	.	.	.	c.1199G>A	p.Arg400His	p.R400H	ENST00000344644	4/5	47	30	16	50	50	0	UGT1A10,missense_variant,p.Arg400His,ENST00000373445,;UGT1A4,missense_variant,p.Arg404His,ENST00000373409,;UGT1A6,missense_variant,p.Arg402His,ENST00000305139,;UGT1A3,missense_variant,p.Arg404His,ENST00000482026,;UGT1A6,missense_variant,p.Arg135His,ENST00000373424,;UGT1A8,missense_variant,p.Arg403His,ENST00000608383,;UGT1A8,missense_variant,p.Arg404His,ENST00000608381,;UGT1A7,missense_variant,p.A…	A	ENSG00000242515
UGT1A10	0	.	GRCh37	2	234678282	234678282	+	Intron	SNP	G	G	A	novel	.	CESC		TCGA-2W-A8YY-01A-11D-A37N-09	TCGA-2W-A8YY-10A-01D-A37N-09	G	G	.	.	.	.	.	.	.	.	.	.	.	.	.	.	.	c.1295+1197G>A	.	.	ENST00000344644	.	62	35	26	97	96	0	UGT1A10,3_prime_UTR_variant,,ENST00000373445,;UGT1A8,3_prime_UTR_variant,,ENST00000360418,;UGT1A6,3_prime_UTR_variant,,ENST00000406651,;UGT1A4,intron_variant,,ENST00000373409,;UGT1A6,intron_variant,,ENST00000305139,;UGT1A3,intron_variant,,ENST00000482026,;UGT1A6,intron_variant,,ENST00000373424,;UGT1A8,intron_variant,,ENST00000608383,;UGT1A8,intron_variant,,ENST00000608381,;UGT1A7,intron_variant,,…	A	ENSG00000242515
UGT1A10	0	.	GRCh37	2	234652220	234652220	+	Intron	SNP	A	A	T	rs763461022	.	CESC		TCGA-IR-A3LF-01A-21D-A22X-09	TCGA-IR-A3LF-10A-01D-A22X-09	A	A	.	.	.	.	.	.	.	.	.	.	.	.	.	.	.	c.856-23460A>T	.	.	ENST00000344644	.	42	38	4	41	41	0	UGT1A10,intron_variant,,ENST00000373445,;UGT1A4,intron_variant,,ENST00000373409,;UGT1A6,intron_variant,,ENST00000305139,;UGT1A3,intron_variant,,ENST00000482026,;UGT1A6,intron_variant,,ENST00000373424,;UGT1A8,intron_variant,,ENST00000608381,;UGT1A7,intron_variant,,ENST00000373426,;UGT1A8,intron_variant,,ENST00000609637,;UGT1A8,intron_variant,,ENST00000609767,;UGT1A5,intron_variant,,ENST00000373414…	T	ENSG00000242515
UGT1A10	0	.	GRCh37	2	234652221	234652221	+	Intron	SNP	G	G	A	novel	.	CESC		TCGA-IR-A3LF-01A-21D-A22X-09	TCGA-IR-A3LF-10A-01D-A22X-09	G	G	.	.	.	.	.	.	.	.	.	.	.	.	.	.	.	c.856-23459G>A	.	.	ENST00000344644	.	41	37	4	41	41	0	UGT1A10,intron_variant,,ENST00000373445,;UGT1A4,intron_variant,,ENST00000373409,;UGT1A6,intron_variant,,ENST00000305139,;UGT1A3,intron_variant,,ENST00000482026,;UGT1A6,intron_variant,,ENST00000373424,;UGT1A8,intron_variant,,ENST00000608381,;UGT1A7,intron_variant,,ENST00000373426,;UGT1A8,intron_variant,,ENST00000609637,;UGT1A8,intron_variant,,ENST00000609767,;UGT1A5,intron_variant,,ENST00000373414…	A	ENSG00000242515
UGT1A10	0	.	GRCh37	2	234545585	234545585	+	Silent	SNP	G	G	A	rs769021073	.	CESC		TCGA-VS-A9UH-01A-11D-A42O-09	TCGA-VS-A9UH-10A-01D-A42R-09	G	G	.	.	.	.	.	.	.	.	.	.	.	.	.	.	.	c.417G>A	p.%3D	p.E139E	ENST00000344644	1/5	57	48	8	68	68	0	UGT1A10,synonymous_variant,p.%3D,ENST00000373445,;UGT1A10,synonymous_variant,p.%3D,ENST00000344644,;UGT1A8,intron_variant,,ENST00000373450,;	A	ENSG00000242515
UGT1A10	0	.	GRCh37	2	234652190	234663541	+	Intron	DEL	CCCCCAAAATATTCTCCAGCGGGTTTCCCAAGAGGTCAAAGGAGAATGGGTCCTGGCCGCCGAAGAACTCCCTGAAGACGTCGGCTGGGTCGCGGAAGCTGAAGACGTACTCGAAGGGGTCCTCGAAGGGCCTGCCGCCTGTGCAGCCGCCCTCCGCCCCCGCCTCGCCATAGCGGTCATAGATATCGCGTTTCTTGGCGTCCGACAACACCTCGTAGGCCTCGGCCACCTGCTTGAATCTCCTCTCCGCTTCCTCCTTGTTCTCAGGGTTTTTGTCGGGGTGCCACTTGAGCGCCAGCTTGCGGTACGCCTTCTTGATGGCCTCGGATGAGGCCTGCCGGGGCACGTCCAGCACCTCGTAGTAGTCCACCATGCTGGATGGCCAGAACGGCCCACCAG…	CCCCCAAAATATTCTCCAGCGGGTTTCCCAAGAGGTCAAAGGAGAATGGGTCCTGGCCGCCGAAGAACTCCCTGAAGACGTCGGCTGGGTCGCGGAAGCTGAAGACGTACTCGAAGGGGTCCTCGAAGGGCCTGCCGCCTGTGCAGCCGCCCTCCGCCCCCGCCTCGCCATAGCGGTCATAGATATCGCGTTTCTTGGCGTCCGACAACACCTCGTAGGCCTCGGCCACCTGCTTGAATCTCCTCTCCGCTTCCTCCTTGTTCTCAGGGTTTTTGTCGGGGTGCCACTTGAGCGCCAGCTTGCGGTACGCCTTCTTGATGGCCTCGGATGAGGCCTGCCGGGGCACGTCCAGCACCTCGTAGTAGTCCACCATGCTGGATGGCCAGAACGGCCCACCAG…	-	novel	.	CESC		TCGA-VS-A9UJ-01A-11D-A42O-09	TCGA-VS-A9UJ-10A-01D-A42R-09	CCCCCAAAATATTCTCCAGCGGGTTTCCCAAGAGGTCAAAGGAGAATGGGTCCTGGCCGCCGAAGAACTCCCTGAAGACGTCGGCTGGGTCGCGGAAGCTGAAGACGTACTCGAAGGGGTCCTCGAAGGGCCTGCCGCCTGTGCAGCCGCCCTCCGCCCCCGCCTCGCCATAGCGGTCATAGATATCGCGTTTCTTGGCGTCCGACAACACCTCGTAGGCCTCGGCCACCTGCTTGAATCTCCTCTCCGCTTCCTCCTTGTTCTCAGGGTTTTTGTCGGGGTGCCACTTGAGCGCCAGCTTGCGGTACGCCTTCTTGATGGCCTCGGATGAGGCCTGCCGGGGCACGTCCAGCACCTCGTAGTAGTCCACCATGCTGGATGGCCAGAACGGCCCACCAG…	CCCCCAAAATATTCTCCAGCGGGTTTCCCAAGAGGTCAAAGGAGAATGGGTCCTGGCCGCCGAAGAACTCCCTGAAGACGTCGGCTGGGTCGCGGAAGCTGAAGACGTACTCGAAGGGGTCCTCGAAGGGCCTGCCGCCTGTGCAGCCGCCCTCCGCCCCCGCCTCGCCATAGCGGTCATAGATATCGCGTTTCTTGGCGTCCGACAACACCTCGTAGGCCTCGGCCACCTGCTTGAATCTCCTCTCCGCTTCCTCCTTGTTCTCAGGGTTTTTGTCGGGGTGCCACTTGAGCGCCAGCTTGCGGTACGCCTTCTTGATGGCCTCGGATGAGGCCTGCCGGGGCACGTCCAGCACCTCGTAGTAGTCCACCATGCTGGATGGCCAGAACGGCCCACCAG…	.	.	.	.	.	.	.	.	.	.	.	.	.	.	.	c.856-23485_856-12134delAAAATATTCTCCAGCGGGTTTCCCAAGAGGTCAAAGGAGAATGGGTCCTGGCCGCCGAAGAACTCCCTGAAGACGTCGGCTGGGTCGCGGAAGCTGAAGACGTACTCGAAGGGGTCCTCGAAGGGCCTGCCGCCTGTGCAGCCGCCCTCCGCCCCCGCCTCGCCATAGCGGTCATAGATATCGCGTTTCTTGGCGTCCGACAACACCTCGTAGGCCTCGGCCACCTGCTTGAATCTCCTCTCCGCTTCCTCCTTGTTCTCAGGGTTTTTGTCGGGGTGCCACTTGAGCGCCAGCTTGCGGTACGCCTTCTTGATGGCCTCGGATGAGGCCTGCCGGGGCACGTCCAGCACCTCGTAGTAGTCCACCATGCTGGAT…	.	.	ENST00000344644	.	48	34	14	53	53	0	UGT1A10,intron_variant,,ENST00000373445,;UGT1A4,intron_variant,,ENST00000373409,;UGT1A6,intron_variant,,ENST00000305139,;UGT1A3,intron_variant,,ENST00000482026,;UGT1A6,intron_variant,,ENST00000373424,;UGT1A8,intron_variant,,ENST00000608381,;UGT1A7,intron_variant,,ENST00000373426,;UGT1A8,intron_variant,,ENST00000609637,;UGT1A8,intron_variant,,ENST00000609767,;UGT1A5,intron_variant,,ENST00000373414…	-	ENSG00000242515
UGT1A10	0	.	GRCh37	2	234651670	234651670	+	Intron	SNP	C	C	T	novel	.	CHOL		TCGA-W5-AA2G-01A-11D-A417-09	TCGA-W5-AA2G-10A-01D-A41A-09	C	C	.	.	.	.	.	.	.	.	.	.	.	.	.	.	.	c.856-24010C>T	.	.	ENST00000344644	.	62	35	27	59	59	0	UGT1A10,intron_variant,,ENST00000373445,;UGT1A4,intron_variant,,ENST00000373409,;UGT1A6,intron_variant,,ENST00000305139,;UGT1A3,intron_variant,,ENST00000482026,;UGT1A6,intron_variant,,ENST00000373424,;UGT1A8,intron_variant,,ENST00000608381,;UGT1A7,intron_variant,,ENST00000373426,;UGT1A8,intron_variant,,ENST00000609637,;UGT1A8,intron_variant,,ENST00000609767,;UGT1A5,intron_variant,,ENST00000373414…	T	ENSG00000242515
UGT1A10	0	.	GRCh37	2	234652110	234652110	+	Intron	SNP	C	C	T	rs542057655	.	COAD		TCGA-A6-2675-01A-02D-1719-10	TCGA-A6-2675-10A-01D-1719-10	C	C	.	.	.	.	.	.	.	.	.	.	.	.	.	.	.	c.856-23570C>T	.	.	ENST00000344644	.	147	130	17	195	194	1	UGT1A10,intron_variant,,ENST00000373445,;UGT1A4,intron_variant,,ENST00000373409,;UGT1A6,intron_variant,,ENST00000305139,;UGT1A3,intron_variant,,ENST00000482026,;UGT1A6,intron_variant,,ENST00000373424,;UGT1A8,intron_variant,,ENST00000608381,;UGT1A7,intron_variant,,ENST00000373426,;UGT1A8,intron_variant,,ENST00000609637,;UGT1A8,intron_variant,,ENST00000609767,;UGT1A5,intron_variant,,ENST00000373414…	T	ENSG00000242515
UGT1A10	0	.	GRCh37	2	234652283	234652283	+	Intron	SNP	G	G	A	rs375962177	.	COAD		TCGA-A6-2686-01A-01D-1408-10	TCGA-A6-2686-11A-01D-1554-10	G	G	.	.	.	.	.	.	.	.	.	.	.	.	.	.	.	c.856-23397G>A	.	.	ENST00000344644	.	22	14	8	65	65	0	UGT1A10,intron_variant,,ENST00000373445,;UGT1A4,intron_variant,,ENST00000373409,;UGT1A6,intron_variant,,ENST00000305139,;UGT1A3,intron_variant,,ENST00000482026,;UGT1A6,intron_variant,,ENST00000373424,;UGT1A8,intron_variant,,ENST00000608381,;UGT1A7,intron_variant,,ENST00000373426,;UGT1A8,intron_variant,,ENST00000609637,;UGT1A8,intron_variant,,ENST00000609767,;UGT1A5,intron_variant,,ENST00000373414…	A	ENSG00000242515
UGT1A10	0	.	GRCh37	2	234652344	234652344	+	Intron	SNP	C	C	T	rs368889261	.	COAD		TCGA-A6-5659-01A-01D-A270-10	TCGA-A6-5659-10A-01D-A270-10	C	C	.	.	.	.	.	.	.	.	.	.	.	.	.	.	.	c.856-23336C>T	.	.	ENST00000344644	.	137	80	57	166	166	0	UGT1A10,intron_variant,,ENST00000373445,;UGT1A4,intron_variant,,ENST00000373409,;UGT1A6,intron_variant,,ENST00000305139,;UGT1A3,intron_variant,,ENST00000482026,;UGT1A6,intron_variant,,ENST00000373424,;UGT1A8,intron_variant,,ENST00000608381,;UGT1A7,intron_variant,,ENST00000373426,;UGT1A8,intron_variant,,ENST00000609637,;UGT1A8,intron_variant,,ENST00000609767,;UGT1A5,intron_variant,,ENST00000373414…	T	ENSG00000242515
UGT1A10	0	.	GRCh37	2	234652471	234652471	+	Intron	SNP	T	T	C	novel	.	COAD		TCGA-AA-3663-01A-01D-1719-10	TCGA-AA-3663-11A-01D-1719-10	T	T	.	.	.	.	.	.	.	.	.	.	.	.	.	.	.	c.856-23209T>C	.	.	ENST00000344644	.	183	135	48	41	41	0	UGT1A10,intron_variant,,ENST00000373445,;UGT1A4,intron_variant,,ENST00000373409,;UGT1A6,intron_variant,,ENST00000305139,;UGT1A3,intron_variant,,ENST00000482026,;UGT1A6,intron_variant,,ENST00000373424,;UGT1A8,intron_variant,,ENST00000608381,;UGT1A7,intron_variant,,ENST00000373426,;UGT1A8,intron_variant,,ENST00000609637,;UGT1A8,intron_variant,,ENST00000609767,;UGT1A5,intron_variant,,ENST00000373414…	C	ENSG00000242515
UGT1A10	0	.	GRCh37	2	234545676	234545677	+	Frame_Shift_Ins	INS	-	-	G	.	.	COAD		TCGA-AA-3672-01A-01W-0900-09	TCGA-AA-3672-10A-01W-0900-09	-	-	.	.	.	.	.	.	.	.	.	.	.	.	.	.	.	c.512dupG	p.Ile172AsnfsTer7	p.I172Nfs*7	ENST00000344644	1/5	662	454	208	503	503	0	UGT1A10,frameshift_variant,p.Ile172AsnfsTer7,ENST00000373445,;UGT1A10,frameshift_variant,p.Ile172AsnfsTer7,ENST00000344644,;UGT1A8,intron_variant,,ENST00000373450,;	G	ENSG00000242515
UGT1A10	0	.	GRCh37	2	234676935	234676935	+	Missense_Mutation	SNP	G	G	A	.	.	COAD		TCGA-AA-3715-01A-01W-0900-09	TCGA-AA-3715-10A-01W-0900-09	G	G	.	.	.	.	.	.	.	.	.	.	.	.	.	.	.	c.1145G>A	p.Gly382Asp	p.G382D	ENST00000344644	4/5	323	274	49	162	162	0	UGT1A10,missense_variant,p.Gly382Asp,ENST00000373445,;UGT1A4,missense_variant,p.Gly386Asp,ENST00000373409,;UGT1A6,missense_variant,p.Gly384Asp,ENST00000305139,;UGT1A3,missense_variant,p.Gly386Asp,ENST00000482026,;UGT1A6,missense_variant,p.Gly117Asp,ENST00000373424,;UGT1A8,missense_variant,p.Gly385Asp,ENST00000608383,;UGT1A8,missense_variant,p.Gly386Asp,ENST00000608381,;UGT1A7,missense_variant,p.G…	A	ENSG00000242515
UGT1A10	0	.	GRCh37	2	234652471	234652471	+	Intron	SNP	T	T	C	novel	.	COAD		TCGA-AA-3821-01A-01W-0995-10	TCGA-AA-3821-10A-01W-0995-10	T	T	.	.	.	.	.	.	.	.	.	.	.	.	.	.	.	c.856-23209T>C	.	.	ENST00000344644	.	102	62	40	44	44	0	UGT1A10,intron_variant,,ENST00000373445,;UGT1A4,intron_variant,,ENST00000373409,;UGT1A6,intron_variant,,ENST00000305139,;UGT1A3,intron_variant,,ENST00000482026,;UGT1A6,intron_variant,,ENST00000373424,;UGT1A8,intron_variant,,ENST00000608381,;UGT1A7,intron_variant,,ENST00000373426,;UGT1A8,intron_variant,,ENST00000609637,;UGT1A8,intron_variant,,ENST00000609767,;UGT1A5,intron_variant,,ENST00000373414…	C	ENSG00000242515
UGT1A10	0	.	GRCh37	2	234676937	234676937	+	Missense_Mutation	SNP	G	G	A	rs143573365	.	COAD		TCGA-AA-A01P-01A-21D-A17O-10	TCGA-AA-A01P-11A-11D-A17O-10	G	G	.	.	.	.	.	.	.	.	.	.	.	.	.	.	.	c.1147G>A	p.Val383Ile	p.V383I	ENST00000344644	4/5	235	183	52	257	257	0	UGT1A10,missense_variant,p.Val383Ile,ENST00000373445,;UGT1A4,missense_variant,p.Val387Ile,ENST00000373409,;UGT1A6,missense_variant,p.Val385Ile,ENST00000305139,;UGT1A3,missense_variant,p.Val387Ile,ENST00000482026,;UGT1A6,missense_variant,p.Val118Ile,ENST00000373424,;UGT1A8,missense_variant,p.Val386Ile,ENST00000608383,;UGT1A8,missense_variant,p.Val387Ile,ENST00000608381,;UGT1A7,missense_variant,p.V…	A	ENSG00000242515
UGT1A10	0	.	GRCh37	2	234675807	234675807	+	Missense_Mutation	SNP	A	A	C	rs72551348	.	COAD		TCGA-AY-4070-01A-01W-1073-09	TCGA-AY-4070-10A-01W-1073-09	A	A	.	.	.	.	.	.	.	.	.	.	.	.	.	.	.	c.983A>C	p.Gln328Pro	p.Q328P	ENST00000344644	2/5	273	245	28	278	278	0	UGT1A10,missense_variant,p.Gln328Pro,ENST00000373445,;UGT1A4,missense_variant,p.Gln332Pro,ENST00000373409,;UGT1A6,missense_variant,p.Gln330Pro,ENST00000305139,;UGT1A3,missense_variant,p.Gln332Pro,ENST00000482026,;UGT1A6,missense_variant,p.Gln63Pro,ENST00000373424,;UGT1A8,missense_variant,p.Gln331Pro,ENST00000608383,;UGT1A8,missense_variant,p.Gln332Pro,ENST00000608381,;UGT1A7,missense_variant,p.Gl…	C	ENSG00000242515
UGT1A10	0	.	GRCh37	2	234652082	234652082	+	Intron	SNP	T	T	C	novel	.	COAD		TCGA-AY-6197-01A-11D-1719-10	TCGA-AY-6197-10A-01D-1719-10	T	T	.	.	.	.	.	.	.	.	.	.	.	.	.	.	.	c.856-23598T>C	.	.	ENST00000344644	.	168	155	12	44	44	0	UGT1A10,intron_variant,,ENST00000373445,;UGT1A4,intron_variant,,ENST00000373409,;UGT1A6,intron_variant,,ENST00000305139,;UGT1A3,intron_variant,,ENST00000482026,;UGT1A6,intron_variant,,ENST00000373424,;UGT1A8,intron_variant,,ENST00000608381,;UGT1A7,intron_variant,,ENST00000373426,;UGT1A8,intron_variant,,ENST00000609637,;UGT1A8,intron_variant,,ENST00000609767,;UGT1A5,intron_variant,,ENST00000373414…	C	ENSG00000242515
UGT1A10	0	.	GRCh37	2	234545609	234545609	+	Silent	SNP	G	G	C	rs766629881	.	COAD		TCGA-CM-4752-01A-01D-1408-10	TCGA-CM-4752-10A-01D-1408-10	G	G	.	.	.	.	.	.	.	.	.	.	.	.	.	.	.	c.441G>C	p.%3D	p.L147L	ENST00000344644	1/5	186	146	39	115	114	0	UGT1A10,synonymous_variant,p.%3D,ENST00000373445,;UGT1A10,synonymous_variant,p.%3D,ENST00000344644,;UGT1A8,intron_variant,,ENST00000373450,;	C	ENSG00000242515
UGT1A10	0	.	GRCh37	2	234675783	234675783	+	Missense_Mutation	SNP	C	C	A	rs761316504	.	COAD		TCGA-D5-6537-01A-11D-1719-10	TCGA-D5-6537-10A-01D-1719-10	C	C	.	.	.	.	.	.	.	.	.	.	.	.	.	.	.	c.959C>A	p.Ala320Asp	p.A320D	ENST00000344644	2/5	131	58	73	70	70	0	UGT1A10,missense_variant,p.Ala320Asp,ENST00000373445,;UGT1A4,missense_variant,p.Ala324Asp,ENST00000373409,;UGT1A6,missense_variant,p.Ala322Asp,ENST00000305139,;UGT1A3,missense_variant,p.Ala324Asp,ENST00000482026,;UGT1A6,missense_variant,p.Ala55Asp,ENST00000373424,;UGT1A8,missense_variant,p.Ala323Asp,ENST00000608383,;UGT1A8,missense_variant,p.Ala324Asp,ENST00000608381,;UGT1A7,missense_variant,p.Al…	A	ENSG00000242515
UGT1A10	0	.	GRCh37	2	234545744	234545744	+	Silent	SNP	T	T	C	novel	.	COAD		TCGA-WS-AB45-01A-11D-A40P-10	TCGA-WS-AB45-10A-01D-A40P-10	T	T	.	.	.	.	.	.	.	.	.	.	.	.	.	.	.	c.576T>C	p.%3D	p.N192N	ENST00000344644	1/5	105	81	24	143	143	0	UGT1A10,synonymous_variant,p.%3D,ENST00000373445,;UGT1A10,synonymous_variant,p.%3D,ENST00000344644,;UGT1A8,intron_variant,,ENST00000373450,;	C	ENSG00000242515
UGT1A10	0	.	GRCh37	2	234676937	234676937	+	Missense_Mutation	SNP	G	G	A	rs143573365	.	COAD		TCGA-WS-AB45-01A-11D-A40P-10	TCGA-WS-AB45-10A-01D-A40P-10	G	G	.	.	.	.	.	.	.	.	.	.	.	.	.	.	.	c.1147G>A	p.Val383Ile	p.V383I	ENST00000344644	4/5	107	91	15	131	131	0	UGT1A10,missense_variant,p.Val383Ile,ENST00000373445,;UGT1A4,missense_variant,p.Val387Ile,ENST00000373409,;UGT1A6,missense_variant,p.Val385Ile,ENST00000305139,;UGT1A3,missense_variant,p.Val387Ile,ENST00000482026,;UGT1A6,missense_variant,p.Val118Ile,ENST00000373424,;UGT1A8,missense_variant,p.Val386Ile,ENST00000608383,;UGT1A8,missense_variant,p.Val387Ile,ENST00000608381,;UGT1A7,missense_variant,p.V…	A	ENSG00000242515
UGT1A10	0	.	GRCh37	2	234652351	234652351	+	Intron	SNP	G	G	A	rs756391897	.	DLBC		TCGA-FF-A7CX-01A-12D-A382-10	TCGA-FF-A7CX-10A-01D-A385-10	G	G	.	.	.	.	.	.	.	.	.	.	.	.	.	.	.	c.856-23329G>A	.	.	ENST00000344644	.	92	53	38	100	100	0	UGT1A10,intron_variant,,ENST00000373445,;UGT1A4,intron_variant,,ENST00000373409,;UGT1A6,intron_variant,,ENST00000305139,;UGT1A3,intron_variant,,ENST00000482026,;UGT1A6,intron_variant,,ENST00000373424,;UGT1A8,intron_variant,,ENST00000608381,;UGT1A7,intron_variant,,ENST00000373426,;UGT1A8,intron_variant,,ENST00000609637,;UGT1A8,intron_variant,,ENST00000609767,;UGT1A5,intron_variant,,ENST00000373414…	A	ENSG00000242515
UGT1A10	0	.	GRCh37	2	234651859	234651859	+	Intron	SNP	T	T	A	novel	.	ESCA		TCGA-JY-A93D-01A-11D-A387-09	TCGA-JY-A93D-10A-01D-A38A-09	T	T	.	.	.	.	.	.	.	.	.	.	.	.	.	.	.	c.856-23821T>A	.	.	ENST00000344644	.	68	64	4	85	85	0	UGT1A10,intron_variant,,ENST00000373445,;UGT1A4,intron_variant,,ENST00000373409,;UGT1A6,intron_variant,,ENST00000305139,;UGT1A3,intron_variant,,ENST00000482026,;UGT1A6,intron_variant,,ENST00000373424,;UGT1A8,intron_variant,,ENST00000608381,;UGT1A7,intron_variant,,ENST00000373426,;UGT1A8,intron_variant,,ENST00000609637,;UGT1A8,intron_variant,,ENST00000609767,;UGT1A5,intron_variant,,ENST00000373414…	A	ENSG00000242515
UGT1A10	0	.	GRCh37	2	234545575	234545575	+	Missense_Mutation	SNP	A	A	G	rs770761874	.	ESCA		TCGA-R6-A6XG-01B-11D-A33E-09	TCGA-R6-A6XG-10A-01D-A33H-09	A	A	.	.	.	.	.	.	.	.	.	.	.	.	.	.	.	c.407A>G	p.Tyr136Cys	p.Y136C	ENST00000344644	1/5	106	97	9	49	49	0	UGT1A10,missense_variant,p.Tyr136Cys,ENST00000373445,;UGT1A10,missense_variant,p.Tyr136Cys,ENST00000344644,;UGT1A8,intron_variant,,ENST00000373450,;	G	ENSG00000242515
UGT1A10	0	.	GRCh37	2	234545195	234545195	+	Silent	SNP	C	C	T	.	.	GBM		TCGA-14-0789-01A-01D-1492-08	TCGA-14-0789-10A-01D-1492-08	C	C	.	.	.	.	.	.	.	.	.	.	.	.	.	.	.	c.27C>T	p.%3D	p.P9P	ENST00000344644	1/5	164	124	39	111	111	0	UGT1A10,synonymous_variant,p.%3D,ENST00000373445,;UGT1A10,synonymous_variant,p.%3D,ENST00000344644,;UGT1A8,intron_variant,,ENST00000373450,;	T	ENSG00000242515
UGT1A10	0	.	GRCh37	2	234545533	234545533	+	Missense_Mutation	SNP	C	C	T	rs145610800	.	GBM		TCGA-19-5959-01A-11D-1696-08	TCGA-19-5959-10A-01D-1696-08	C	C	.	.	.	.	.	.	.	.	.	.	.	.	.	.	.	c.365C>T	p.Ser122Leu	p.S122L	ENST00000344644	1/5	144	85	59	148	148	0	UGT1A10,missense_variant,p.Ser122Leu,ENST00000373445,;UGT1A10,missense_variant,p.Ser122Leu,ENST00000344644,;UGT1A8,intron_variant,,ENST00000373450,;	T	ENSG00000242515
UGT1A10	0	.	GRCh37	2	234652585	234652585	+	Intron	SNP	C	C	T	novel	.	HNSC		TCGA-CN-4737-01A-01D-1434-08	TCGA-CN-4737-10A-01D-1434-08	C	C	.	.	.	.	.	.	.	.	.	.	.	.	.	.	.	c.856-23095C>T	.	.	ENST00000344644	.	32	24	7	44	44	0	UGT1A10,intron_variant,,ENST00000373445,;UGT1A4,intron_variant,,ENST00000373409,;UGT1A6,intron_variant,,ENST00000305139,;UGT1A3,intron_variant,,ENST00000482026,;UGT1A6,intron_variant,,ENST00000373424,;UGT1A8,intron_variant,,ENST00000608381,;UGT1A7,intron_variant,,ENST00000373426,;UGT1A8,intron_variant,,ENST00000609637,;UGT1A8,intron_variant,,ENST00000609767,;UGT1A5,intron_variant,,ENST00000373414…	T	ENSG00000242515
UGT1A10	0	.	GRCh37	2	234545887	234545887	+	Missense_Mutation	SNP	C	C	T	rs149598882	.	HNSC		TCGA-CQ-5333-01A-01D-2394-08	TCGA-CQ-5333-10A-01D-2394-08	C	C	.	.	.	.	.	.	.	.	.	.	.	.	.	.	.	c.719C>T	p.Thr240Met	p.T240M	ENST00000344644	1/5	463	332	130	320	319	1	UGT1A10,missense_variant,p.Thr240Met,ENST00000373445,;UGT1A10,missense_variant,p.Thr240Met,ENST00000344644,;UGT1A8,intron_variant,,ENST00000373450,;	T	ENSG00000242515
UGT1A10	0	.	GRCh37	2	234545520	234545520	+	Missense_Mutation	SNP	G	G	C	rs45458396	.	HNSC		TCGA-CR-7368-01A-11D-2129-08	TCGA-CR-7368-10A-01D-2129-08	G	G	.	.	.	.	.	.	.	.	.	.	.	.	.	.	.	c.352G>C	p.Asp118His	p.D118H	ENST00000344644	1/5	124	111	13	144	143	0	UGT1A10,missense_variant,p.Asp118His,ENST00000373445,;UGT1A10,missense_variant,p.Asp118His,ENST00000344644,;UGT1A8,intron_variant,,ENST00000373450,;	C	ENSG00000242515
UGT1A10	0	.	GRCh37	2	234678255	234678255	+	Intron	SNP	C	C	T	rs776582226	.	HNSC		TCGA-CV-6960-01A-41D-2012-08	TCGA-CV-6960-10A-01D-2013-08	C	C	.	.	.	.	.	.	.	.	.	.	.	.	.	.	.	c.1295+1170C>T	.	.	ENST00000344644	.	29	26	3	35	35	0	UGT1A10,3_prime_UTR_variant,,ENST00000373445,;UGT1A8,3_prime_UTR_variant,,ENST00000360418,;UGT1A6,3_prime_UTR_variant,,ENST00000406651,;UGT1A4,intron_variant,,ENST00000373409,;UGT1A6,intron_variant,,ENST00000305139,;UGT1A3,intron_variant,,ENST00000482026,;UGT1A6,intron_variant,,ENST00000373424,;UGT1A8,intron_variant,,ENST00000608383,;UGT1A8,intron_variant,,ENST00000608381,;UGT1A7,intron_variant,,…	T	ENSG00000242515
UGT1A10	0	.	GRCh37	2	234652654	234652654	+	Intron	SNP	G	G	A	novel	.	HNSC		TCGA-CV-7250-01A-11D-2012-08	TCGA-CV-7250-10A-01D-2013-08	G	G	.	.	.	.	.	.	.	.	.	.	.	.	.	.	.	c.856-23026G>A	.	.	ENST00000344644	.	13	10	3	23	23	0	UGT1A10,intron_variant,,ENST00000373445,;UGT1A4,intron_variant,,ENST00000373409,;UGT1A6,intron_variant,,ENST00000305139,;UGT1A3,intron_variant,,ENST00000482026,;UGT1A6,intron_variant,,ENST00000373424,;UGT1A8,intron_variant,,ENST00000608381,;UGT1A7,intron_variant,,ENST00000373426,;UGT1A8,intron_variant,,ENST00000609637,;UGT1A8,intron_variant,,ENST00000609767,;UGT1A5,intron_variant,,ENST00000373414…	A	ENSG00000242515
UGT1A10	0	.	GRCh37	2	234678287	234678287	+	Intron	SNP	G	G	A	novel	.	HNSC		TCGA-CV-A45O-01A-21D-A24D-08	TCGA-CV-A45O-10A-01D-A24F-08	G	G	.	.	.	.	.	.	.	.	.	.	.	.	.	.	.	c.1295+1202G>A	.	.	ENST00000344644	.	21	17	4	18	18	0	UGT1A10,3_prime_UTR_variant,,ENST00000373445,;UGT1A8,3_prime_UTR_variant,,ENST00000360418,;UGT1A6,3_prime_UTR_variant,,ENST00000406651,;UGT1A4,intron_variant,,ENST00000373409,;UGT1A6,intron_variant,,ENST00000305139,;UGT1A3,intron_variant,,ENST00000482026,;UGT1A6,intron_variant,,ENST00000373424,;UGT1A8,intron_variant,,ENST00000608383,;UGT1A8,intron_variant,,ENST00000608381,;UGT1A7,intron_variant,,…	A	ENSG00000242515
UGT1A10	0	.	GRCh37	2	234652629	234652629	+	Intron	SNP	G	G	A	novel	.	HNSC		TCGA-F7-A624-01A-22D-A30E-08	TCGA-F7-A624-10A-01D-A30H-08	G	G	.	.	.	.	.	.	.	.	.	.	.	.	.	.	.	c.856-23051G>A	.	.	ENST00000344644	.	21	15	6	22	22	0	UGT1A10,intron_variant,,ENST00000373445,;UGT1A4,intron_variant,,ENST00000373409,;UGT1A6,intron_variant,,ENST00000305139,;UGT1A3,intron_variant,,ENST00000482026,;UGT1A6,intron_variant,,ENST00000373424,;UGT1A8,intron_variant,,ENST00000608381,;UGT1A7,intron_variant,,ENST00000373426,;UGT1A8,intron_variant,,ENST00000609637,;UGT1A8,intron_variant,,ENST00000609767,;UGT1A5,intron_variant,,ENST00000373414…	A	ENSG00000242515
UGT1A10	0	.	GRCh37	2	234545342	234545342	+	Silent	SNP	C	C	T	.	.	KIRC		TCGA-AS-3778-01A-01D-0966-08	TCGA-AS-3778-10A-01D-0966-08	C	C	.	.	.	.	.	.	.	.	.	.	.	.	.	.	.	c.174C>T	p.%3D	p.V58V	ENST00000344644	1/5	218	202	16	126	126	0	UGT1A10,synonymous_variant,p.%3D,ENST00000373445,;UGT1A10,synonymous_variant,p.%3D,ENST00000344644,;UGT1A8,intron_variant,,ENST00000373450,;	T	ENSG00000242515
UGT1A10	0	.	GRCh37	2	234652351	234652351	+	Intron	SNP	G	G	A	rs756391897	.	KIRP		TCGA-B1-5398-01A-02D-1589-08	TCGA-B1-5398-10A-01D-1589-08	G	G	.	.	.	.	.	.	.	.	.	.	.	.	.	.	.	c.856-23329G>A	.	.	ENST00000344644	.	170	132	38	197	196	0	UGT1A10,intron_variant,,ENST00000373445,;UGT1A4,intron_variant,,ENST00000373409,;UGT1A6,intron_variant,,ENST00000305139,;UGT1A3,intron_variant,,ENST00000482026,;UGT1A6,intron_variant,,ENST00000373424,;UGT1A8,intron_variant,,ENST00000608381,;UGT1A7,intron_variant,,ENST00000373426,;UGT1A8,intron_variant,,ENST00000609637,;UGT1A8,intron_variant,,ENST00000609767,;UGT1A5,intron_variant,,ENST00000373414…	A	ENSG00000242515
UGT1A10	0	.	GRCh37	2	234652372	234652372	+	Intron	SNP	A	A	G	novel	.	KIRP		TCGA-B1-5398-01A-02D-1589-08	TCGA-B1-5398-10A-01D-1589-08	A	A	.	.	.	.	.	.	.	.	.	.	.	.	.	.	.	c.856-23308A>G	.	.	ENST00000344644	.	215	179	36	227	227	0	UGT1A10,intron_variant,,ENST00000373445,;UGT1A4,intron_variant,,ENST00000373409,;UGT1A6,intron_variant,,ENST00000305139,;UGT1A3,intron_variant,,ENST00000482026,;UGT1A6,intron_variant,,ENST00000373424,;UGT1A8,intron_variant,,ENST00000608381,;UGT1A7,intron_variant,,ENST00000373426,;UGT1A8,intron_variant,,ENST00000609637,;UGT1A8,intron_variant,,ENST00000609767,;UGT1A5,intron_variant,,ENST00000373414…	G	ENSG00000242515
UGT1A10	0	.	GRCh37	2	234545301	234545301	+	Missense_Mutation	SNP	G	G	A	rs371430642	.	KIRP		TCGA-UZ-A9PN-01A-11D-A382-10	TCGA-UZ-A9PN-10A-01D-A385-10	G	G	.	.	.	.	.	.	.	.	.	.	.	.	.	.	.	c.133G>A	p.Val45Met	p.V45M	ENST00000344644	1/5	75	54	21	108	108	0	UGT1A10,missense_variant,p.Val45Met,ENST00000373445,;UGT1A10,missense_variant,p.Val45Met,ENST00000344644,;UGT1A8,intron_variant,,ENST00000373450,;	A	ENSG00000242515
UGT1A10	0	.	GRCh37	2	234675730	234675741	+	In_Frame_Del	DEL	CTCTTTGGGATC	CTCTTTGGGATC	-	novel	.	KIRP		TCGA-WN-AB4C-01A-11D-A42J-10	TCGA-WN-AB4C-10A-01D-A42M-10	CTCTTTGGGATC	CTCTTTGGGATC	.	.	.	.	.	.	.	.	.	.	.	.	.	.	.	c.906_917delCTCTTTGGGATC	p.Phe302_Ser306delinsLeu	p.F302_S306delinsL	ENST00000344644	2/5	107	76	31	92	92	0	UGT1A10,inframe_deletion,p.Phe302_Ser306delinsLeu,ENST00000373445,;UGT1A4,inframe_deletion,p.Phe306_Ser310delinsLeu,ENST00000373409,;UGT1A6,inframe_deletion,p.Phe304_Ser308delinsLeu,ENST00000305139,;UGT1A3,inframe_deletion,p.Phe306_Ser310delinsLeu,ENST00000482026,;UGT1A6,inframe_deletion,p.Phe37_Ser41delinsLeu,ENST00000373424,;UGT1A8,inframe_deletion,p.Phe305_Ser309delinsLeu,ENST00000608383,;UGT1…	-	ENSG00000242515
UGT1A10	0	.	GRCh37	2	234652393	234652393	+	Intron	SNP	G	G	A	rs370175895	.	LGG		TCGA-CS-6667-01A-12D-2024-08	TCGA-CS-6667-10A-01D-2024-08	G	G	.	.	.	.	.	.	.	.	.	.	.	.	.	.	.	c.856-23287G>A	.	.	ENST00000344644	.	252	172	80	235	235	0	UGT1A10,intron_variant,,ENST00000373445,;UGT1A4,intron_variant,,ENST00000373409,;UGT1A6,intron_variant,,ENST00000305139,;UGT1A3,intron_variant,,ENST00000482026,;UGT1A6,intron_variant,,ENST00000373424,;UGT1A8,intron_variant,,ENST00000608381,;UGT1A7,intron_variant,,ENST00000373426,;UGT1A8,intron_variant,,ENST00000609637,;UGT1A8,intron_variant,,ENST00000609767,;UGT1A5,intron_variant,,ENST00000373414…	A	ENSG00000242515
UGT1A10	0	.	GRCh37	2	234652548	234652548	+	Intron	SNP	G	G	A	rs770691045	.	LGG		TCGA-DU-A7TD-01A-12D-A34A-08	TCGA-DU-A7TD-10A-01D-A34A-08	G	G	.	.	.	.	.	.	.	.	.	.	.	.	.	.	.	c.856-23132G>A	.	.	ENST00000344644	.	41	32	9	53	53	0	UGT1A10,intron_variant,,ENST00000373445,;UGT1A4,intron_variant,,ENST00000373409,;UGT1A6,intron_variant,,ENST00000305139,;UGT1A3,intron_variant,,ENST00000482026,;UGT1A6,intron_variant,,ENST00000373424,;UGT1A8,intron_variant,,ENST00000608381,;UGT1A7,intron_variant,,ENST00000373426,;UGT1A8,intron_variant,,ENST00000609637,;UGT1A8,intron_variant,,ENST00000609767,;UGT1A5,intron_variant,,ENST00000373414…	A	ENSG00000242515
UGT1A10	0	.	GRCh37	2	234652389	234652389	+	Intron	SNP	G	G	A	rs745945267	.	LGG		TCGA-E1-A7Z3-01A-11D-A34J-08	TCGA-E1-A7Z3-10A-01D-A34M-08	G	G	.	.	.	.	.	.	.	.	.	.	.	.	.	.	.	c.856-23291G>A	.	.	ENST00000344644	.	235	166	69	221	221	0	UGT1A10,intron_variant,,ENST00000373445,;UGT1A4,intron_variant,,ENST00000373409,;UGT1A6,intron_variant,,ENST00000305139,;UGT1A3,intron_variant,,ENST00000482026,;UGT1A6,intron_variant,,ENST00000373424,;UGT1A8,intron_variant,,ENST00000608381,;UGT1A7,intron_variant,,ENST00000373426,;UGT1A8,intron_variant,,ENST00000609637,;UGT1A8,intron_variant,,ENST00000609767,;UGT1A5,intron_variant,,ENST00000373414…	A	ENSG00000242515
UGT1A10	0	.	GRCh37	2	234652378	234652378	+	Intron	SNP	C	C	T	novel	.	LGG		TCGA-FG-6692-01A-11D-1893-08	TCGA-FG-6692-10A-01D-1893-08	C	C	.	.	.	.	.	.	.	.	.	.	.	.	.	.	.	c.856-23302C>T	.	.	ENST00000344644	.	331	212	119	341	341	0	UGT1A10,intron_variant,,ENST00000373445,;UGT1A4,intron_variant,,ENST00000373409,;UGT1A6,intron_variant,,ENST00000305139,;UGT1A3,intron_variant,,ENST00000482026,;UGT1A6,intron_variant,,ENST00000373424,;UGT1A8,intron_variant,,ENST00000608381,;UGT1A7,intron_variant,,ENST00000373426,;UGT1A8,intron_variant,,ENST00000609637,;UGT1A8,intron_variant,,ENST00000609767,;UGT1A5,intron_variant,,ENST00000373414…	T	ENSG00000242515
UGT1A10	0	.	GRCh37	2	234652338	234652338	+	Intron	SNP	G	G	A	rs184388078	.	LGG		TCGA-FG-7638-01B-11D-2086-08	TCGA-FG-7638-10A-01D-2086-08	G	G	.	.	.	.	.	.	.	.	.	.	.	.	.	.	.	c.856-23342G>A	.	.	ENST00000344644	.	168	94	74	161	161	0	UGT1A10,intron_variant,,ENST00000373445,;UGT1A4,intron_variant,,ENST00000373409,;UGT1A6,intron_variant,,ENST00000305139,;UGT1A3,intron_variant,,ENST00000482026,;UGT1A6,intron_variant,,ENST00000373424,;UGT1A8,intron_variant,,ENST00000608381,;UGT1A7,intron_variant,,ENST00000373426,;UGT1A8,intron_variant,,ENST00000609637,;UGT1A8,intron_variant,,ENST00000609767,;UGT1A5,intron_variant,,ENST00000373414…	A	ENSG00000242515
UGT1A10	0	.	GRCh37	2	234652392	234652392	+	Intron	SNP	C	C	T	rs527503361	.	LGG		TCGA-HT-8564-01A-11D-2395-08	TCGA-HT-8564-10A-01D-2396-08	C	C	.	.	.	.	.	.	.	.	.	.	.	.	.	.	.	c.856-23288C>T	.	.	ENST00000344644	.	416	371	44	314	313	0	UGT1A10,intron_variant,,ENST00000373445,;UGT1A4,intron_variant,,ENST00000373409,;UGT1A6,intron_variant,,ENST00000305139,;UGT1A3,intron_variant,,ENST00000482026,;UGT1A6,intron_variant,,ENST00000373424,;UGT1A8,intron_variant,,ENST00000608381,;UGT1A7,intron_variant,,ENST00000373426,;UGT1A8,intron_variant,,ENST00000609637,;UGT1A8,intron_variant,,ENST00000609767,;UGT1A5,intron_variant,,ENST00000373414…	T	ENSG00000242515
UGT1A10	0	.	GRCh37	2	234652248	234652248	+	Intron	SNP	G	G	A	novel	.	LGG		TCGA-VM-A8CE-01A-11D-A36O-08	TCGA-VM-A8CE-10A-01D-A367-08	G	G	.	.	.	.	.	.	.	.	.	.	.	.	.	.	.	c.856-23432G>A	.	.	ENST00000344644	.	95	72	23	84	84	0	UGT1A10,intron_variant,,ENST00000373445,;UGT1A4,intron_variant,,ENST00000373409,;UGT1A6,intron_variant,,ENST00000305139,;UGT1A3,intron_variant,,ENST00000482026,;UGT1A6,intron_variant,,ENST00000373424,;UGT1A8,intron_variant,,ENST00000608381,;UGT1A7,intron_variant,,ENST00000373426,;UGT1A8,intron_variant,,ENST00000609637,;UGT1A8,intron_variant,,ENST00000609767,;UGT1A5,intron_variant,,ENST00000373414…	A	ENSG00000242515
UGT1A10	0	.	GRCh37	2	234545929	234545929	+	Missense_Mutation	SNP	G	G	A	rs181646977	.	LIHC		TCGA-4R-AA8I-01A-11D-A382-10	TCGA-4R-AA8I-10B-01D-A385-10	G	G	.	.	.	.	.	.	.	.	.	.	.	.	.	.	.	c.761G>A	p.Arg254Gln	p.R254Q	ENST00000344644	1/5	85	52	33	109	109	0	UGT1A10,missense_variant,p.Arg254Gln,ENST00000373445,;UGT1A10,missense_variant,p.Arg254Gln,ENST00000344644,;UGT1A8,intron_variant,,ENST00000373450,;	A	ENSG00000242515
UGT1A10	0	.	GRCh37	2	234545950	234545950	+	Missense_Mutation	SNP	A	A	G	novel	.	LIHC		TCGA-UB-A7MB-01A-11D-A33Q-10	TCGA-UB-A7MB-10A-01D-A33Q-10	A	A	.	.	.	.	.	.	.	.	.	.	.	.	.	.	.	c.782A>G	p.Tyr261Cys	p.Y261C	ENST00000344644	1/5	76	45	31	81	81	0	UGT1A10,missense_variant,p.Tyr261Cys,ENST00000373445,;UGT1A10,missense_variant,p.Tyr261Cys,ENST00000344644,;UGT1A8,intron_variant,,ENST00000373450,;	G	ENSG00000242515
UGT1A10	0	.	GRCh37	2	234652434	234652434	+	Intron	SNP	C	C	A	novel	.	LUAD		TCGA-05-4405-01A-21D-1855-08	TCGA-05-4405-10A-01D-1855-08	C	C	.	.	.	.	.	.	.	.	.	.	.	.	.	.	.	c.856-23246C>A	.	.	ENST00000344644	.	312	285	26	226	226	0	UGT1A10,intron_variant,,ENST00000373445,;UGT1A4,intron_variant,,ENST00000373409,;UGT1A6,intron_variant,,ENST00000305139,;UGT1A3,intron_variant,,ENST00000482026,;UGT1A6,intron_variant,,ENST00000373424,;UGT1A8,intron_variant,,ENST00000608381,;UGT1A7,intron_variant,,ENST00000373426,;UGT1A8,intron_variant,,ENST00000609637,;UGT1A8,intron_variant,,ENST00000609767,;UGT1A5,intron_variant,,ENST00000373414…	A	ENSG00000242515
UGT1A10	0	.	GRCh37	2	234652498	234652498	+	Intron	SNP	G	G	A	rs770873874	.	LUAD		TCGA-17-Z003-01A-01W-0746-08	TCGA-17-Z003-11A-01W-0746-08	G	G	.	.	.	.	.	.	.	.	.	.	.	.	.	.	.	c.856-23182G>A	.	.	ENST00000344644	.	65	56	9	86	86	0	UGT1A10,intron_variant,,ENST00000373445,;UGT1A4,intron_variant,,ENST00000373409,;UGT1A6,intron_variant,,ENST00000305139,;UGT1A3,intron_variant,,ENST00000482026,;UGT1A6,intron_variant,,ENST00000373424,;UGT1A8,intron_variant,,ENST00000608381,;UGT1A7,intron_variant,,ENST00000373426,;UGT1A8,intron_variant,,ENST00000609637,;UGT1A8,intron_variant,,ENST00000609767,;UGT1A5,intron_variant,,ENST00000373414…	A	ENSG00000242515
UGT1A10	0	.	GRCh37	2	234545674	234545674	+	Missense_Mutation	SNP	C	C	A	novel	.	LUAD		TCGA-17-Z023-01A-01W-0746-08	TCGA-17-Z023-11A-01W-0746-08	C	C	.	.	.	.	.	.	.	.	.	.	.	.	.	.	.	c.506C>A	p.Thr169Asn	p.T169N	ENST00000344644	1/5	165	133	31	175	175	0	UGT1A10,missense_variant,p.Thr169Asn,ENST00000373445,;UGT1A10,missense_variant,p.Thr169Asn,ENST00000344644,;UGT1A8,intron_variant,,ENST00000373450,;	A	ENSG00000242515
UGT1A10	0	.	GRCh37	2	234652531	234652531	+	Intron	SNP	G	G	T	novel	.	LUAD		TCGA-17-Z031-01A-01W-0746-08	TCGA-17-Z031-11A-01W-0746-08	G	G	.	.	.	.	.	.	.	.	.	.	.	.	.	.	.	c.856-23149G>T	.	.	ENST00000344644	.	101	50	50	47	47	0	UGT1A10,intron_variant,,ENST00000373445,;UGT1A4,intron_variant,,ENST00000373409,;UGT1A6,intron_variant,,ENST00000305139,;UGT1A3,intron_variant,,ENST00000482026,;UGT1A6,intron_variant,,ENST00000373424,;UGT1A8,intron_variant,,ENST00000608381,;UGT1A7,intron_variant,,ENST00000373426,;UGT1A8,intron_variant,,ENST00000609637,;UGT1A8,intron_variant,,ENST00000609767,;UGT1A5,intron_variant,,ENST00000373414…	T	ENSG00000242515
UGT1A10	0	.	GRCh37	2	234545533	234545533	+	Missense_Mutation	SNP	C	C	T	rs145610800	.	LUAD		TCGA-17-Z049-01A-01W-0746-08	TCGA-17-Z049-11A-01W-0747-08	C	C	.	.	.	.	.	.	.	.	.	.	.	.	.	.	.	c.365C>T	p.Ser122Leu	p.S122L	ENST00000344644	1/5	218	109	108	374	374	0	UGT1A10,missense_variant,p.Ser122Leu,ENST00000373445,;UGT1A10,missense_variant,p.Ser122Leu,ENST00000344644,;UGT1A8,intron_variant,,ENST00000373450,;	T	ENSG00000242515
UGT1A10	0	.	GRCh37	2	234676544	234676544	+	Missense_Mutation	SNP	C	C	A	rs776227074	.	LUAD		TCGA-17-Z049-01A-01W-0746-08	TCGA-17-Z049-11A-01W-0747-08	C	C	.	.	.	.	.	.	.	.	.	.	.	.	.	.	.	c.1037C>A	p.Thr346Lys	p.T346K	ENST00000344644	3/5	199	152	46	269	269	0	UGT1A10,missense_variant,p.Thr346Lys,ENST00000373445,;UGT1A4,missense_variant,p.Thr350Lys,ENST00000373409,;UGT1A6,missense_variant,p.Thr348Lys,ENST00000305139,;UGT1A3,missense_variant,p.Thr350Lys,ENST00000482026,;UGT1A6,missense_variant,p.Thr81Lys,ENST00000373424,;UGT1A8,missense_variant,p.Thr349Lys,ENST00000608383,;UGT1A8,missense_variant,p.Thr350Lys,ENST00000608381,;UGT1A7,missense_variant,p.Th…	A	ENSG00000242515
UGT1A10	0	.	GRCh37	2	234676909	234676909	+	Missense_Mutation	SNP	T	T	A	.	.	LUAD		TCGA-38-4625-01A-01D-1553-08	TCGA-38-4625-11A-01D-1553-08	T	T	.	.	.	.	.	.	.	.	.	.	.	.	.	.	.	c.1119T>A	p.His373Gln	p.H373Q	ENST00000344644	4/5	156	130	26	144	144	0	UGT1A10,missense_variant,p.His373Gln,ENST00000373445,;UGT1A4,missense_variant,p.His377Gln,ENST00000373409,;UGT1A6,missense_variant,p.His375Gln,ENST00000305139,;UGT1A3,missense_variant,p.His377Gln,ENST00000482026,;UGT1A6,missense_variant,p.His108Gln,ENST00000373424,;UGT1A8,missense_variant,p.His376Gln,ENST00000608383,;UGT1A8,missense_variant,p.His377Gln,ENST00000608381,;UGT1A7,missense_variant,p.H…	A	ENSG00000242515
UGT1A10	0	.	GRCh37	2	234652078	234652078	+	Intron	SNP	G	G	T	rs779473501	.	LUAD		TCGA-38-4626-01A-01D-1553-08	TCGA-38-4626-11A-01D-1553-08	G	G	.	.	.	.	.	.	.	.	.	.	.	.	.	.	.	c.856-23602G>T	.	.	ENST00000344644	.	17	13	4	10	10	0	UGT1A10,intron_variant,,ENST00000373445,;UGT1A4,intron_variant,,ENST00000373409,;UGT1A6,intron_variant,,ENST00000305139,;UGT1A3,intron_variant,,ENST00000482026,;UGT1A6,intron_variant,,ENST00000373424,;UGT1A8,intron_variant,,ENST00000608381,;UGT1A7,intron_variant,,ENST00000373426,;UGT1A8,intron_variant,,ENST00000609637,;UGT1A8,intron_variant,,ENST00000609767,;UGT1A5,intron_variant,,ENST00000373414…	T	ENSG00000242515
UGT1A10	0	.	GRCh37	2	234652384	234652384	+	Intron	SNP	T	T	C	novel	.	LUAD		TCGA-38-4626-01A-01D-1553-08	TCGA-38-4626-11A-01D-1553-08	T	T	.	.	.	.	.	.	.	.	.	.	.	.	.	.	.	c.856-23296T>C	.	.	ENST00000344644	.	201	189	12	227	227	0	UGT1A10,intron_variant,,ENST00000373445,;UGT1A4,intron_variant,,ENST00000373409,;UGT1A6,intron_variant,,ENST00000305139,;UGT1A3,intron_variant,,ENST00000482026,;UGT1A6,intron_variant,,ENST00000373424,;UGT1A8,intron_variant,,ENST00000608381,;UGT1A7,intron_variant,,ENST00000373426,;UGT1A8,intron_variant,,ENST00000609637,;UGT1A8,intron_variant,,ENST00000609767,;UGT1A5,intron_variant,,ENST00000373414…	C	ENSG00000242515
UGT1A10	0	.	GRCh37	2	234545440	234545440	+	Missense_Mutation	SNP	T	T	A	rs141009803	.	LUAD		TCGA-44-2657-01A-01D-1105-08	TCGA-44-2657-10A-01D-1105-08	T	T	.	.	.	.	.	.	.	.	.	.	.	.	.	.	.	c.272T>A	p.Met91Lys	p.M91K	ENST00000344644	1/5	205	173	31	158	158	0	UGT1A10,missense_variant,p.Met91Lys,ENST00000373445,;UGT1A10,missense_variant,p.Met91Lys,ENST00000344644,;UGT1A8,intron_variant,,ENST00000373450,;	A	ENSG00000242515
UGT1A10	0	.	GRCh37	2	234545808	234545808	+	Missense_Mutation	SNP	T	T	A	.	.	LUAD		TCGA-44-2659-01A-01D-0969-08	TCGA-44-2659-10A-01D-0969-08	T	T	.	.	.	.	.	.	.	.	.	.	.	.	.	.	.	c.640T>A	p.Leu214Met	p.L214M	ENST00000344644	1/5	386	318	68	447	447	0	UGT1A10,missense_variant,p.Leu214Met,ENST00000373445,;UGT1A10,missense_variant,p.Leu214Met,ENST00000344644,;UGT1A8,intron_variant,,ENST00000373450,;	A	ENSG00000242515
UGT1A10	0	.	GRCh37	2	234652077	234652077	+	Intron	SNP	C	C	G	rs755334550	.	LUAD		TCGA-44-6778-01A-11D-1855-08	TCGA-44-6778-10A-01D-1855-08	C	C	.	.	.	.	.	.	.	.	.	.	.	.	.	.	.	c.856-23603C>G	.	.	ENST00000344644	.	18	14	4	14	14	0	UGT1A10,intron_variant,,ENST00000373445,;UGT1A4,intron_variant,,ENST00000373409,;UGT1A6,intron_variant,,ENST00000305139,;UGT1A3,intron_variant,,ENST00000482026,;UGT1A6,intron_variant,,ENST00000373424,;UGT1A8,intron_variant,,ENST00000608381,;UGT1A7,intron_variant,,ENST00000373426,;UGT1A8,intron_variant,,ENST00000609637,;UGT1A8,intron_variant,,ENST00000609767,;UGT1A5,intron_variant,,ENST00000373414…	G	ENSG00000242515
UGT1A10	0	.	GRCh37	2	234545480	234545480	+	Silent	SNP	T	T	C	.	.	LUAD		TCGA-44-7662-01A-11D-2063-08	TCGA-44-7662-10A-01D-2063-08	T	T	.	.	.	.	.	.	.	.	.	.	.	.	.	.	.	c.312T>C	p.%3D	p.S104S	ENST00000344644	1/5	142	119	23	114	114	0	UGT1A10,synonymous_variant,p.%3D,ENST00000373445,;UGT1A10,synonymous_variant,p.%3D,ENST00000344644,;UGT1A8,intron_variant,,ENST00000373450,;	C	ENSG00000242515
UGT1A10	0	.	GRCh37	2	234678206	234678206	+	Intron	SNP	G	G	A	rs542225006	.	LUAD		TCGA-44-8117-01A-11D-2238-08	TCGA-44-8117-10A-01D-2238-08	G	G	.	.	.	.	.	.	.	.	.	.	.	.	.	.	.	c.1295+1121G>A	.	.	ENST00000344644	.	70	56	14	78	78	0	UGT1A10,stop_retained_variant,p.%3D,ENST00000373445,;UGT1A8,stop_retained_variant,p.%3D,ENST00000360418,;UGT1A6,stop_retained_variant,p.%3D,ENST00000406651,;UGT1A4,intron_variant,,ENST00000373409,;UGT1A6,intron_variant,,ENST00000305139,;UGT1A3,intron_variant,,ENST00000482026,;UGT1A6,intron_variant,,ENST00000373424,;UGT1A8,intron_variant,,ENST00000608383,;UGT1A8,intron_variant,,ENST00000608381,;UG…	A	ENSG00000242515
UGT1A10	0	.	GRCh37	2	234652317	234652317	+	Intron	SNP	G	G	A	novel	.	LUAD		TCGA-53-7624-01A-11D-2063-08	TCGA-53-7624-10A-01D-2063-08	G	G	.	.	.	.	.	.	.	.	.	.	.	.	.	.	.	c.856-23363G>A	.	.	ENST00000344644	.	133	77	56	152	152	0	UGT1A10,intron_variant,,ENST00000373445,;UGT1A4,intron_variant,,ENST00000373409,;UGT1A6,intron_variant,,ENST00000305139,;UGT1A3,intron_variant,,ENST00000482026,;UGT1A6,intron_variant,,ENST00000373424,;UGT1A8,intron_variant,,ENST00000608381,;UGT1A7,intron_variant,,ENST00000373426,;UGT1A8,intron_variant,,ENST00000609637,;UGT1A8,intron_variant,,ENST00000609767,;UGT1A5,intron_variant,,ENST00000373414…	A	ENSG00000242515
UGT1A10	0	.	GRCh37	2	234545830	234545830	+	Missense_Mutation	SNP	A	A	T	rs569576876	.	LUAD		TCGA-55-6975-01A-11D-1945-08	TCGA-55-6975-11A-01D-1945-08	A	A	.	.	.	.	.	.	.	.	.	.	.	.	.	.	.	c.662A>T	p.Gln221Leu	p.Q221L	ENST00000344644	1/5	380	275	105	374	373	0	UGT1A10,missense_variant,p.Gln221Leu,ENST00000373445,;UGT1A10,missense_variant,p.Gln221Leu,ENST00000344644,;UGT1A8,intron_variant,,ENST00000373450,;	T	ENSG00000242515
UGT1A10	0	.	GRCh37	2	234545643	234545643	+	Missense_Mutation	SNP	A	A	G	.	.	LUAD		TCGA-55-6981-01A-11D-1945-08	TCGA-55-6981-11A-01D-1945-08	A	A	.	.	.	.	.	.	.	.	.	.	.	.	.	.	.	c.475A>G	p.Lys159Glu	p.K159E	ENST00000344644	1/5	171	143	28	373	373	0	UGT1A10,missense_variant,p.Lys159Glu,ENST00000373445,;UGT1A10,missense_variant,p.Lys159Glu,ENST00000344644,;UGT1A8,intron_variant,,ENST00000373450,;	G	ENSG00000242515
UGT1A10	0	.	GRCh37	2	234652533	234652533	+	Intron	SNP	C	C	A	novel	.	LUAD		TCGA-55-8089-01A-11D-2238-08	TCGA-55-8089-10A-01D-2238-08	C	C	.	.	.	.	.	.	.	.	.	.	.	.	.	.	.	c.856-23147C>A	.	.	ENST00000344644	.	46	39	7	47	47	0	UGT1A10,intron_variant,,ENST00000373445,;UGT1A4,intron_variant,,ENST00000373409,;UGT1A6,intron_variant,,ENST00000305139,;UGT1A3,intron_variant,,ENST00000482026,;UGT1A6,intron_variant,,ENST00000373424,;UGT1A8,intron_variant,,ENST00000608381,;UGT1A7,intron_variant,,ENST00000373426,;UGT1A8,intron_variant,,ENST00000609637,;UGT1A8,intron_variant,,ENST00000609767,;UGT1A5,intron_variant,,ENST00000373414…	A	ENSG00000242515
UGT1A10	0	.	GRCh37	2	234678226	234678226	+	Intron	SNP	G	G	T	novel	.	LUAD		TCGA-55-8089-01A-11D-2238-08	TCGA-55-8089-10A-01D-2238-08	G	G	.	.	.	.	.	.	.	.	.	.	.	.	.	.	.	c.1295+1141G>T	.	.	ENST00000344644	.	57	51	5	71	71	0	UGT1A10,3_prime_UTR_variant,,ENST00000373445,;UGT1A8,3_prime_UTR_variant,,ENST00000360418,;UGT1A6,3_prime_UTR_variant,,ENST00000406651,;UGT1A4,intron_variant,,ENST00000373409,;UGT1A6,intron_variant,,ENST00000305139,;UGT1A3,intron_variant,,ENST00000482026,;UGT1A6,intron_variant,,ENST00000373424,;UGT1A8,intron_variant,,ENST00000608383,;UGT1A8,intron_variant,,ENST00000608381,;UGT1A7,intron_variant,,…	T	ENSG00000242515
UGT1A10	0	.	GRCh37	2	234652547	234652547	+	Intron	SNP	C	C	G	novel	.	LUAD		TCGA-62-A46O-01A-11D-A24D-08	TCGA-62-A46O-10A-01D-A24F-08	C	C	.	.	.	.	.	.	.	.	.	.	.	.	.	.	.	c.856-23133C>G	.	.	ENST00000344644	.	104	75	29	51	51	0	UGT1A10,intron_variant,,ENST00000373445,;UGT1A4,intron_variant,,ENST00000373409,;UGT1A6,intron_variant,,ENST00000305139,;UGT1A3,intron_variant,,ENST00000482026,;UGT1A6,intron_variant,,ENST00000373424,;UGT1A8,intron_variant,,ENST00000608381,;UGT1A7,intron_variant,,ENST00000373426,;UGT1A8,intron_variant,,ENST00000609637,;UGT1A8,intron_variant,,ENST00000609767,;UGT1A5,intron_variant,,ENST00000373414…	G	ENSG00000242515
UGT1A10	0	.	GRCh37	2	234652454	234652454	+	Intron	SNP	C	C	A	novel	.	LUAD		TCGA-69-7980-01A-11D-2184-08	TCGA-69-7980-10A-01D-2184-08	C	C	.	.	.	.	.	.	.	.	.	.	.	.	.	.	.	c.856-23226C>A	.	.	ENST00000344644	.	168	140	28	224	224	0	UGT1A10,intron_variant,,ENST00000373445,;UGT1A4,intron_variant,,ENST00000373409,;UGT1A6,intron_variant,,ENST00000305139,;UGT1A3,intron_variant,,ENST00000482026,;UGT1A6,intron_variant,,ENST00000373424,;UGT1A8,intron_variant,,ENST00000608381,;UGT1A7,intron_variant,,ENST00000373426,;UGT1A8,intron_variant,,ENST00000609637,;UGT1A8,intron_variant,,ENST00000609767,;UGT1A5,intron_variant,,ENST00000373414…	A	ENSG00000242515
UGT1A10	0	.	GRCh37	2	234545239	234545239	+	Missense_Mutation	SNP	A	A	G	.	.	LUAD		TCGA-78-7160-01A-11D-2036-08	TCGA-78-7160-10A-01D-2036-08	A	A	.	.	.	.	.	.	.	.	.	.	.	.	.	.	.	c.71A>G	p.Glu24Gly	p.E24G	ENST00000344644	1/5	125	109	16	124	124	0	UGT1A10,missense_variant,p.Glu24Gly,ENST00000373445,;UGT1A10,missense_variant,p.Glu24Gly,ENST00000344644,;UGT1A8,intron_variant,,ENST00000373450,;	G	ENSG00000242515
UGT1A10	0	.	GRCh37	2	234545158	234545158	+	5'UTR	SNP	G	G	A	novel	.	LUAD		TCGA-78-7535-01A-11D-2063-08	TCGA-78-7535-10A-01D-2063-08	G	G	.	.	.	.	.	.	.	.	.	.	.	.	.	.	.	c.-11G>A	.	.	ENST00000344644	1/5	79	53	25	92	92	0	UGT1A10,5_prime_UTR_variant,,ENST00000373445,;UGT1A10,5_prime_UTR_variant,,ENST00000344644,;UGT1A8,intron_variant,,ENST00000373450,;	A	ENSG00000242515
UGT1A10	0	.	GRCh37	2	234546000	234546000	+	Missense_Mutation	SNP	C	C	A	.	.	LUAD		TCGA-80-5608-01A-31D-1945-08	TCGA-80-5608-10A-01D-1946-08	C	C	.	.	.	.	.	.	.	.	.	.	.	.	.	.	.	c.832C>A	p.His278Asn	p.H278N	ENST00000344644	1/5	325	242	83	231	230	1	UGT1A10,missense_variant,p.His278Asn,ENST00000373445,;UGT1A10,missense_variant,p.His278Asn,ENST00000344644,;UGT1A8,intron_variant,,ENST00000373450,;	A	ENSG00000242515
UGT1A10	0	.	GRCh37	2	234677057	234677057	+	Missense_Mutation	SNP	G	G	T	rs750232648	.	LUAD		TCGA-86-6851-01A-11D-1945-08	TCGA-86-6851-10A-01D-1946-08	G	G	.	.	.	.	.	.	.	.	.	.	.	.	.	.	.	c.1267G>T	p.Ala423Ser	p.A423S	ENST00000344644	4/5	24	19	5	39	39	0	UGT1A10,missense_variant,p.Ala423Ser,ENST00000373445,;UGT1A4,missense_variant,p.Ala427Ser,ENST00000373409,;UGT1A6,missense_variant,p.Ala425Ser,ENST00000305139,;UGT1A3,missense_variant,p.Ala427Ser,ENST00000482026,;UGT1A6,missense_variant,p.Ala158Ser,ENST00000373424,;UGT1A8,missense_variant,p.Ala426Ser,ENST00000608383,;UGT1A8,missense_variant,p.Ala427Ser,ENST00000608381,;UGT1A7,missense_variant,p.A…	T	ENSG00000242515
UGT1A10	0	.	GRCh37	2	234652326	234652326	+	Intron	SNP	G	G	A	rs555741522	.	LUAD		TCGA-86-8359-01A-11D-2323-08	TCGA-86-8359-10A-01D-2323-08	G	G	.	.	.	.	.	.	.	.	.	.	.	.	.	.	.	c.856-23354G>A	.	.	ENST00000344644	.	225	194	30	229	229	0	UGT1A10,intron_variant,,ENST00000373445,;UGT1A4,intron_variant,,ENST00000373409,;UGT1A6,intron_variant,,ENST00000305139,;UGT1A3,intron_variant,,ENST00000482026,;UGT1A6,intron_variant,,ENST00000373424,;UGT1A8,intron_variant,,ENST00000608381,;UGT1A7,intron_variant,,ENST00000373426,;UGT1A8,intron_variant,,ENST00000609637,;UGT1A8,intron_variant,,ENST00000609767,;UGT1A5,intron_variant,,ENST00000373414…	A	ENSG00000242515
UGT1A10	0	.	GRCh37	2	234545503	234545503	+	Missense_Mutation	SNP	C	C	T	novel	.	LUAD		TCGA-95-7567-01A-11D-2063-08	TCGA-95-7567-10A-01D-2063-08	C	C	.	.	.	.	.	.	.	.	.	.	.	.	.	.	.	c.335C>T	p.Ser112Leu	p.S112L	ENST00000344644	1/5	128	111	17	156	156	0	UGT1A10,missense_variant,p.Ser112Leu,ENST00000373445,;UGT1A10,missense_variant,p.Ser112Leu,ENST00000344644,;UGT1A8,intron_variant,,ENST00000373450,;	T	ENSG00000242515
UGT1A10	0	.	GRCh37	2	234545287	234545287	+	Missense_Mutation	SNP	C	C	T	novel	.	LUAD		TCGA-95-A4VP-01A-21D-A25L-08	TCGA-95-A4VP-10A-01D-A25L-08	C	C	.	.	.	.	.	.	.	.	.	.	.	.	.	.	.	c.119C>T	p.Thr40Ile	p.T40I	ENST00000344644	1/5	169	160	9	120	120	0	UGT1A10,missense_variant,p.Thr40Ile,ENST00000373445,;UGT1A10,missense_variant,p.Thr40Ile,ENST00000344644,;UGT1A8,intron_variant,,ENST00000373450,;	T	ENSG00000242515
UGT1A10	0	.	GRCh37	2	234652436	234652436	+	Intron	SNP	C	C	T	novel	.	LUAD		TCGA-97-8176-01A-11D-2393-08	TCGA-97-8176-10B-01D-2393-08	C	C	.	.	.	.	.	.	.	.	.	.	.	.	.	.	.	c.856-23244C>T	.	.	ENST00000344644	.	330	270	59	268	268	0	UGT1A10,intron_variant,,ENST00000373445,;UGT1A4,intron_variant,,ENST00000373409,;UGT1A6,intron_variant,,ENST00000305139,;UGT1A3,intron_variant,,ENST00000482026,;UGT1A6,intron_variant,,ENST00000373424,;UGT1A8,intron_variant,,ENST00000608381,;UGT1A7,intron_variant,,ENST00000373426,;UGT1A8,intron_variant,,ENST00000609637,;UGT1A8,intron_variant,,ENST00000609767,;UGT1A5,intron_variant,,ENST00000373414…	T	ENSG00000242515
UGT1A10	0	.	GRCh37	2	234678201	234678201	+	Intron	SNP	G	G	C	novel	.	LUAD		TCGA-MN-A4N4-01A-12D-A24P-08	TCGA-MN-A4N4-10A-01D-A24P-08	G	G	.	.	.	.	.	.	.	.	.	.	.	.	.	.	.	c.1295+1116G>C	.	.	ENST00000344644	.	35	25	10	65	65	0	UGT1A10,missense_variant,p.Gln440His,ENST00000373445,;UGT1A8,missense_variant,p.Gln443His,ENST00000360418,;UGT1A6,missense_variant,p.Gln175His,ENST00000406651,;UGT1A4,intron_variant,,ENST00000373409,;UGT1A6,intron_variant,,ENST00000305139,;UGT1A3,intron_variant,,ENST00000482026,;UGT1A6,intron_variant,,ENST00000373424,;UGT1A8,intron_variant,,ENST00000608383,;UGT1A8,intron_variant,,ENST00000608381,…	C	ENSG00000242515
UGT1A10	0	.	GRCh37	2	234652186	234652186	+	Intron	SNP	G	G	A	novel	.	LUAD		TCGA-05-4250-01A-01D-1105-08	TCGA-05-4250-10A-01D-1105-08	G	G	.	.	.	.	.	.	.	.	.	.	.	.	.	.	.	c.856-23494G>A	.	.	ENST00000344644	.	132	111	21	69	69	0	UGT1A10,intron_variant,,ENST00000373445,;UGT1A4,intron_variant,,ENST00000373409,;UGT1A6,intron_variant,,ENST00000305139,;UGT1A3,intron_variant,,ENST00000482026,;UGT1A6,intron_variant,,ENST00000373424,;UGT1A8,intron_variant,,ENST00000608381,;UGT1A7,intron_variant,,ENST00000373426,;UGT1A8,intron_variant,,ENST00000609637,;UGT1A8,intron_variant,,ENST00000609767,;UGT1A5,intron_variant,,ENST00000373414…	A	ENSG00000242515
UGT1A10	0	.	GRCh37	2	234652156	234652156	+	Intron	SNP	C	C	T	novel	.	LUSC		TCGA-21-1079-01A-01W-0782-08	TCGA-21-1079-11A-01W-0782-08	C	C	.	.	.	.	.	.	.	.	.	.	.	.	.	.	.	c.856-23524C>T	.	.	ENST00000344644	.	17	9	7	61	61	0	UGT1A10,intron_variant,,ENST00000373445,;UGT1A4,intron_variant,,ENST00000373409,;UGT1A6,intron_variant,,ENST00000305139,;UGT1A3,intron_variant,,ENST00000482026,;UGT1A6,intron_variant,,ENST00000373424,;UGT1A8,intron_variant,,ENST00000608381,;UGT1A7,intron_variant,,ENST00000373426,;UGT1A8,intron_variant,,ENST00000609637,;UGT1A8,intron_variant,,ENST00000609767,;UGT1A5,intron_variant,,ENST00000373414…	T	ENSG00000242515
UGT1A10	0	.	GRCh37	2	234652362	234652362	+	Intron	SNP	G	G	A	rs779950685	.	LUSC		TCGA-22-4591-01A-01D-1267-08	TCGA-22-4591-11A-01D-1267-08	G	G	.	.	.	.	.	.	.	.	.	.	.	.	.	.	.	c.856-23318G>A	.	.	ENST00000344644	.	746	558	187	493	493	0	UGT1A10,intron_variant,,ENST00000373445,;UGT1A4,intron_variant,,ENST00000373409,;UGT1A6,intron_variant,,ENST00000305139,;UGT1A3,intron_variant,,ENST00000482026,;UGT1A6,intron_variant,,ENST00000373424,;UGT1A8,intron_variant,,ENST00000608381,;UGT1A7,intron_variant,,ENST00000373426,;UGT1A8,intron_variant,,ENST00000609637,;UGT1A8,intron_variant,,ENST00000609767,;UGT1A5,intron_variant,,ENST00000373414…	A	ENSG00000242515
UGT1A10	0	.	GRCh37	2	234545255	234545255	+	Silent	SNP	G	G	C	.	.	LUSC		TCGA-22-5473-01A-01D-1632-08	TCGA-22-5473-11A-11D-1632-08	G	G	.	.	.	.	.	.	.	.	.	.	.	.	.	.	.	c.87G>C	p.%3D	p.L29L	ENST00000344644	1/5	164	129	35	170	170	0	UGT1A10,synonymous_variant,p.%3D,ENST00000373445,;UGT1A10,synonymous_variant,p.%3D,ENST00000344644,;UGT1A8,intron_variant,,ENST00000373450,;	C	ENSG00000242515
UGT1A10	0	.	GRCh37	2	234652404	234652404	+	Intron	SNP	G	G	A	rs761738753	.	LUSC		TCGA-33-4533-01A-01D-1267-08	TCGA-33-4533-11A-01D-1267-08	G	G	.	.	.	.	.	.	.	.	.	.	.	.	.	.	.	c.856-23276G>A	.	.	ENST00000344644	.	623	501	122	601	601	0	UGT1A10,intron_variant,,ENST00000373445,;UGT1A4,intron_variant,,ENST00000373409,;UGT1A6,intron_variant,,ENST00000305139,;UGT1A3,intron_variant,,ENST00000482026,;UGT1A6,intron_variant,,ENST00000373424,;UGT1A8,intron_variant,,ENST00000608381,;UGT1A7,intron_	A	ENSG00000242515
UGT1A10	0	.	GRCh37	2	234545802	234545802	+	Missense_Mutation	SNP	G	G	A	rs139087628	.	LUSC		TCGA-34-2600-01A-01D-1522-08	TCGA-34-2600-11A-01D-1522-08	G	G	.	.	.	.	.	.	.	.	.	.	.	.	.	.	.	c.634G>A	p.Val212Met	p.V212M	ENST00000344644	1/5	510	479	30	441	441	0	UGT1A10,missense_variant,p.Val212Met,ENST00000373445,;UGT1A10,missense_variant,p.Val212Met,ENST00000344644,;UGT1A8,intron_variant,,ENST00000373450,;	A	ENSG00000242515
UGT1A10	0	.	GRCh37	2	234675779	234675779	+	Missense_Mutation	SNP	A	A	G	rs200903749	.	LUSC		TCGA-56-6546-01A-11D-1817-08	TCGA-56-6546-10A-01D-1817-08	A	A	.	.	.	.	.	.	.	.	.	.	.	.	.	.	.	c.955A>G	p.Ile319Val	p.I319V	ENST00000344644	2/5	158	124	33	133	133	0	UGT1A10,missense_variant,p.Ile319Val,ENST00000373445,;UGT1A4,missense_variant,p.Ile323Val,ENST00000373409,;UGT1A6,missense_variant,p.Ile321Val,ENST00000305139,;UGT1A3,missense_variant,p.Ile323Val,ENST00000482026,;UGT1A6,missense_variant,p.Ile54Val,ENST00000373424,;UGT1A8,missense_variant,p.Ile322Val,ENST00000608383,;UGT1A8,missense_variant,p.Ile323Val,ENST00000608381,;UGT1A7,missense_variant,p.Il…	G	ENSG00000242515
UGT1A10	0	.	GRCh37	2	234545877	234545877	+	Missense_Mutation	SNP	A	A	G	.	.	LUSC		TCGA-60-2724-01A-01D-1522-08	TCGA-60-2724-11A-01D-1522-08	A	A	.	.	.	.	.	.	.	.	.	.	.	.	.	.	.	c.709A>G	p.Thr237Ala	p.T237A	ENST00000344644	1/5	739	561	177	772	772	0	UGT1A10,missense_variant,p.Thr237Ala,ENST00000373445,;UGT1A10,missense_variant,p.Thr237Ala,ENST00000344644,;UGT1A8,intron_variant,,ENST00000373450,;	G	ENSG00000242515
UGT1A10	0	.	GRCh37	2	234545179	234545179	+	Missense_Mutation	SNP	C	C	A	rs547494193	.	LUSC		TCGA-90-7964-01A-21D-2184-08	TCGA-90-7964-10A-01D-2184-08	C	C	.	.	.	.	.	.	.	.	.	.	.	.	.	.	.	c.11C>A	p.Ala4Glu	p.A4E	ENST00000344644	1/5	84	64	20	110	110	0	UGT1A10,missense_variant,p.Ala4Glu,ENST00000373445,;UGT1A10,missense_variant,p.Ala4Glu,ENST00000344644,;UGT1A8,intron_variant,,ENST00000373450,;	A	ENSG00000242515
UGT1A10	0	.	GRCh37	2	234652515	234652515	+	Intron	SNP	G	G	T	rs763783144	.	LUSC		TCGA-98-A538-01A-11D-A25L-08	TCGA-98-A538-10A-01D-A25L-08	G	G	.	.	.	.	.	.	.	.	.	.	.	.	.	.	.	c.856-23165G>T	.	.	ENST00000344644	.	133	82	50	143	142	0	UGT1A10,intron_variant,,ENST00000373445,;UGT1A4,intron_variant,,ENST00000373409,;UGT1A6,intron_variant,,ENST00000305139,;UGT1A3,intron_variant,,ENST00000482026,;UGT1A6,intron_variant,,ENST00000373424,;UGT1A8,intron_variant,,ENST00000608381,;UGT1A7,intron_variant,,ENST00000373426,;UGT1A8,intron_variant,,ENST00000609637,;UGT1A8,intron_variant,,ENST00000609767,;UGT1A5,intron_variant,,ENST00000373414…	T	ENSG00000242515
UGT1A10	0	.	GRCh37	2	234677001	234677001	+	Missense_Mutation	SNP	A	A	G	.	.	LUSC		TCGA-L3-A524-01A-11D-A25L-08	TCGA-L3-A524-10A-01D-A25L-08	A	A	.	.	.	.	.	.	.	.	.	.	.	.	.	.	.	c.1211A>G	p.Lys404Arg	p.K404R	ENST00000344644	4/5	80	37	43	78	78	0	UGT1A10,missense_variant,p.Lys404Arg,ENST00000373445,;UGT1A4,missense_variant,p.Lys408Arg,ENST00000373409,;UGT1A6,missense_variant,p.Lys406Arg,ENST00000305139,;UGT1A3,missense_variant,p.Lys408Arg,ENST00000482026,;UGT1A6,missense_variant,p.Lys139Arg,ENST00000373424,;UGT1A8,missense_variant,p.Lys407Arg,ENST00000608383,;UGT1A8,missense_variant,p.Lys408Arg,ENST00000608381,;UGT1A7,missense_variant,p.L…	G	ENSG00000242515
UGT1A10	0	.	GRCh37	2	234545318	234545318	+	Silent	SNP	C	C	T	novel	.	LUSC		TCGA-O2-A52Q-01A-11D-A26M-08	TCGA-O2-A52Q-10A-01D-A26K-08	C	C	.	.	.	.	.	.	.	.	.	.	.	.	.	.	.	c.150C>T	p.%3D	p.L50L	ENST00000344644	1/5	132	111	20	109	109	0	UGT1A10,synonymous_variant,p.%3D,ENST00000373445,;UGT1A10,synonymous_variant,p.%3D,ENST00000344644,;UGT1A8,intron_variant,,ENST00000373450,;	T	ENSG00000242515
UGT1A10	0	.	GRCh37	2	234545397	234545397	+	Missense_Mutation	SNP	T	T	A	rs759958389	.	LUSC		TCGA-O2-A52W-01A-11D-A26M-08	TCGA-O2-A52W-10A-01D-A26K-08	T	T	.	.	.	.	.	.	.	.	.	.	.	.	.	.	.	c.229T>A	p.Tyr77Asn	p.Y77N	ENST00000344644	1/5	103	70	33	64	64	0	UGT1A10,missense_variant,p.Tyr77Asn,ENST00000373445,;UGT1A10,missense_variant,p.Tyr77Asn,ENST00000344644,;UGT1A8,intron_variant,,ENST00000373450,;	A	ENSG00000242515
UGT1A10	0	.	GRCh37	2	234545279	234545279	+	Missense_Mutation	SNP	C	C	G	.	.	OV		TCGA-13-0887-01A-01W-0420-08	TCGA-13-0887-10A-01W-0420-08	C	C	.	.	.	.	.	.	.	.	.	.	.	.	.	.	.	c.111C>G	p.His37Gln	p.H37Q	ENST00000344644	1/5	272	165	107	276	276	0	UGT1A10,missense_variant,p.His37Gln,ENST00000373445,;UGT1A10,missense_variant,p.His37Gln,ENST00000344644,;UGT1A8,intron_variant,,ENST00000373450,;	G	ENSG00000242515
UGT1A10	0	.	GRCh37	2	234652364	234652364	+	Intron	SNP	G	G	A	rs751411472	.	OV		TCGA-20-1684-01A-01W-0633-09	TCGA-20-1684-10A-01W-0633-09	G	G	.	.	.	.	.	.	.	.	.	.	.	.	.	.	.	c.856-23316G>A	.	.	ENST00000344644	.	79	47	32	139	139	0	UGT1A10,intron_variant,,ENST00000373445,;UGT1A4,intron_variant,,ENST00000373409,;UGT1A6,intron_variant,,ENST00000305139,;UGT1A3,intron_variant,,ENST00000482026,;UGT1A6,intron_variant,,ENST00000373424,;UGT1A8,intron_variant,,ENST00000608381,;UGT1A7,intron_variant,,ENST00000373426,;UGT1A8,intron_variant,,ENST00000609637,;UGT1A8,intron_variant,,ENST00000609767,;UGT1A5,intron_variant,,ENST00000373414…	A	ENSG00000242515
UGT1A10	0	.	GRCh37	2	234545171	234545187	+	Frame_Shift_Del	DEL	GGCTCGCGCAGGGTGGA	GGCTCGCGCAGGGTGGA	-	novel	.	OV		TCGA-29-2434-01A-01D-1526-09	TCGA-29-2434-10A-01D-1526-09	GGCTCGCGCAGGGTGGA	GGCTCGCGCAGGGTGGA	.	.	.	.	.	.	.	.	.	.	.	.	.	.	.	c.3_19delGGCTCGCGCAGGGTGGA	p.Met1_?7	p.M1_?7	ENST00000344644	1/5	222	190	32	128	128	0	UGT1A10,frameshift_variant,p.Met1_?7,ENST00000373445,;UGT1A10,frameshift_variant,p.Met1_?7,ENST00000344644,;UGT1A8,intron_variant,,ENST00000373450,;	-	ENSG00000242515
UGT1A10	0	.	GRCh37	2	234652221	234652221	+	Intron	SNP	G	G	C	novel	.	OV		TCGA-30-1857-01A-02W-0639-09	TCGA-30-1857-10A-01W-0639-09	G	G	.	.	.	.	.	.	.	.	.	.	.	.	.	.	.	c.856-23459G>C	.	.	ENST00000344644	.	49	30	18	53	53	0	UGT1A10,intron_variant,,ENST00000373445,;UGT1A4,intron_variant,,ENST00000373409,;UGT1A6,intron_variant,,ENST00000305139,;UGT1A3,intron_variant,,ENST00000482026,;UGT1A6,intron_variant,,ENST00000373424,;UGT1A8,intron_variant,,ENST00000608381,;UGT1A7,intron_variant,,ENST00000373426,;UGT1A8,intron_variant,,ENST00000609637,;UGT1A8,intron_variant,,ENST00000609767,;UGT1A5,intron_variant,,ENST00000373414…	C	ENSG00000242515
UGT1A10	0	.	GRCh37	2	234545823	234545823	+	Missense_Mutation	SNP	T	T	C	.	.	OV		TCGA-09-2044-01B-01D-0704-01	TCGA-09-2044-10A-01D-0704-01	T	T	.	.	.	.	.	.	.	.	.	.	.	.	.	.	.	c.655T>C	p.Phe219Leu	p.F219L	ENST00000344644	1/5	144	79	65	310	310	0	UGT1A10,missense_variant,p.Phe219Leu,ENST00000373445,;UGT1A10,missense_variant,p.Phe219Leu,ENST00000344644,;UGT1A8,intron_variant,,ENST00000373450,;	C	ENSG00000242515
UGT1A10	0	.	GRCh37	2	234652389	234652389	+	Intron	SNP	G	G	A	rs745945267	.	READ		TCGA-AG-A01J-01A-01W-A00E-09	TCGA-AG-A01J-10A-01W-A00E-09	G	G	.	.	.	.	.	.	.	.	.	.	.	.	.	.	.	c.856-23291G>A	.	.	ENST00000344644	.	57	45	12	57	57	0	UGT1A10,intron_variant,,ENST00000373445,;UGT1A4,intron_variant,,ENST00000373409,;UGT1A6,intron_variant,,ENST00000305139,;UGT1A3,intron_variant,,ENST00000482026,;UGT1A6,intron_variant,,ENST00000373424,;UGT1A8,intron_variant,,ENST00000608381,;UGT1A7,intron_variant,,ENST00000373426,;UGT1A8,intron_variant,,ENST00000609637,;UGT1A8,intron_variant,,ENST00000609767,;UGT1A5,intron_variant,,ENST00000373414…	A	ENSG00000242515
UGT1A10	0	.	GRCh37	2	234652338	234652338	+	Intron	SNP	G	G	A	rs184388078	.	SARC		TCGA-DX-A3M1-01A-11D-A228-09	TCGA-DX-A3M1-10A-01D-A22A-09	G	G	.	.	.	.	.	.	.	.	.	.	.	.	.	.	.	c.856-23342G>A	.	.	ENST00000344644	.	44	13	31	100	100	0	UGT1A10,intron_variant,,ENST00000373445,;UGT1A4,intron_variant,,ENST00000373409,;UGT1A6,intron_variant,,ENST00000305139,;UGT1A3,intron_variant,,ENST00000482026,;UGT1A6,intron_variant,,ENST00000373424,;UGT1A8,intron_variant,,ENST00000608381,;UGT1A7,intron_variant,,ENST00000373426,;UGT1A8,intron_variant,,ENST00000609637,;UGT1A8,intron_variant,,ENST00000609767,;UGT1A5,intron_variant,,ENST00000373414…	A	ENSG00000242515
UGT1A10	0	.	GRCh37	2	234545737	234545737	+	Frame_Shift_Del	DEL	T	T	-	novel	.	SARC		TCGA-DX-A6BF-01A-11D-A307-09	TCGA-DX-A6BF-10A-01D-A307-09	T	T	.	.	.	.	.	.	.	.	.	.	.	.	.	.	.	c.569delT	p.Val190AlafsTer6	p.V190Afs*6	ENST00000344644	1/5	188	147	41	192	192	0	UGT1A10,frameshift_variant,p.Val190AlafsTer6,ENST00000373445,;UGT1A10,frameshift_variant,p.Val190AlafsTer6,ENST00000344644,;UGT1A8,intron_variant,,ENST00000373450,;	-	ENSG00000242515
UGT1A10	0	.	GRCh37	2	234652241	234652241	+	Intron	SNP	C	C	T	novel	.	SARC		TCGA-DX-A8BP-01A-11D-A37C-09	TCGA-DX-A8BP-10A-01D-A37F-09	C	C	.	.	.	.	.	.	.	.	.	.	.	.	.	.	.	c.856-23439C>T	.	.	ENST00000344644	.	47	37	10	63	63	0	UGT1A10,intron_variant,,ENST00000373445,;UGT1A4,intron_variant,,ENST00000373409,;UGT1A6,intron_variant,,ENST00000305139,;UGT1A3,intron_variant,,ENST00000482026,;UGT1A6,intron_variant,,ENST00000373424,;UGT1A8,intron_variant,,ENST00000608381,;UGT1A7,intron_variant,,ENST00000373426,;UGT1A8,intron_variant,,ENST00000609637,;UGT1A8,intron_variant,,ENST00000609767,;UGT1A5,intron_variant,,ENST00000373414…	T	ENSG00000242515
UGT1A10	0	.	GRCh37	2	234651547	234651547	+	Intron	SNP	G	G	A	novel	.	SARC		TCGA-DX-AB2E-01A-11D-A38Z-09	TCGA-DX-AB2E-10A-01D-A38Z-09	G	G	.	.	.	.	.	.	.	.	.	.	.	.	.	.	.	c.856-24133G>A	.	.	ENST00000344644	.	28	22	5	57	57	0	UGT1A10,intron_variant,,ENST00000373445,;UGT1A4,intron_variant,,ENST00000373409,;UGT1A6,intron_variant,,ENST00000305139,;UGT1A3,intron_variant,,ENST00000482026,;UGT1A6,intron_variant,,ENST00000373424,;UGT1A8,intron_variant,,ENST00000608381,;UGT1A7,intron_variant,,ENST00000373426,;UGT1A8,intron_variant,,ENST00000609637,;UGT1A8,intron_variant,,ENST00000609767,;UGT1A5,intron_variant,,ENST00000373414…	A	ENSG00000242515
UGT1A10	0	.	GRCh37	2	234651912	234651912	+	Intron	SNP	A	A	T	novel	.	SARC		TCGA-MJ-A68H-01A-11D-A307-09	TCGA-MJ-A68H-10A-01D-A307-09	A	A	.	.	.	.	.	.	.	.	.	.	.	.	.	.	.	c.856-23768A>T	.	.	ENST00000344644	.	72	56	16	151	151	0	UGT1A10,intron_variant,,ENST00000373445,;UGT1A4,intron_variant,,ENST00000373409,;UGT1A6,intron_variant,,ENST00000305139,;UGT1A3,intron_variant,,ENST00000482026,;UGT1A6,intron_variant,,ENST00000373424,;UGT1A8,intron_variant,,ENST00000608381,;UGT1A7,intron_variant,,ENST00000373426,;UGT1A8,intron_variant,,ENST00000609637,;UGT1A8,intron_variant,,ENST00000609767,;UGT1A5,intron_variant,,ENST00000373414…	T	ENSG00000242515
UGT1A10	0	.	GRCh37	2	234651542	234651542	+	Intron	DEL	A	A	-	rs28900374	.	SARC		TCGA-QC-A7B5-01A-11D-A33E-09	TCGA-QC-A7B5-11A-11D-A33H-09	A	A	.	.	.	.	.	.	.	.	.	.	.	.	.	.	.	c.856-24134delA	.	.	ENST00000344644	.	36	31	5	31	31	0	UGT1A10,intron_variant,,ENST00000373445,;UGT1A4,intron_variant,,ENST00000373409,;UGT1A6,intron_variant,,ENST00000305139,;UGT1A3,intron_variant,,ENST00000482026,;UGT1A6,intron_variant,,ENST00000373424,;UGT1A8,intron_variant,,ENST00000608381,;UGT1A7,intron_variant,,ENST00000373426,;UGT1A8,intron_variant,,ENST00000609637,;UGT1A8,intron_variant,,ENST00000609767,;UGT1A5,intron_variant,,ENST00000373414…	-	ENSG00000242515
UGT1A10	0	.	GRCh37	2	234545533	234545533	+	Missense_Mutation	SNP	C	C	T	rs145610800	.	SKCM primary		TCGA-BF-A3DN-01A-11D-A20D-08	TCGA-BF-A3DN-10A-01D-A20D-08	C	C	.	.	.	.	.	.	.	.	.	.	.	.	.	.	.	c.365C>T	p.Ser122Leu	p.S122L	ENST00000344644	1/5	147	129	18	123	123	0	UGT1A10,missense_variant,p.Ser122Leu,ENST00000373445,;UGT1A10,missense_variant,p.Ser122Leu,ENST00000344644,;UGT1A8,intron_variant,,ENST00000373450,;	T	ENSG00000242515
UGT1A10	0	.	GRCh37	2	234652376	234652376	+	Intron	SNP	C	C	T	rs189214805	.	SKCM primary		TCGA-BF-A9VF-01A-11D-A372-08	TCGA-BF-A9VF-10A-01D-A375-08	C	C	.	.	.	.	.	.	.	.	.	.	.	.	.	.	.	c.856-23304C>T	.	.	ENST00000344644	.	192	103	89	148	148	0	UGT1A10,intron_variant,,ENST00000373445,;UGT1A4,intron_variant,,ENST00000373409,;UGT1A6,intron_variant,,ENST00000305139,;UGT1A3,intron_variant,,ENST00000482026,;UGT1A6,intron_variant,,ENST00000373424,;UGT1A8,intron_variant,,ENST00000608381,;UGT1A7,intron_variant,,ENST00000373426,;UGT1A8,intron_variant,,ENST00000609637,;UGT1A8,intron_variant,,ENST00000609767,;UGT1A5,intron_variant,,ENST00000373414…	T	ENSG00000242515
UGT1A10	0	.	GRCh37	2	234652284	234652284	+	Intron	SNP	G	G	A	rs767583424	.	SKCM primary		TCGA-DA-A960-01A-11D-A372-08	TCGA-DA-A960-10A-01D-A375-08	G	G	.	.	.	.	.	.	.	.	.	.	.	.	.	.	.	c.856-23396G>A	.	.	ENST00000344644	.	131	70	61	138	138	0	UGT1A10,intron_variant,,ENST00000373445,;UGT1A4,intron_variant,,ENST00000373409,;UGT1A6,intron_variant,,ENST00000305139,;UGT1A3,intron_variant,,ENST00000482026,;UGT1A6,intron_variant,,ENST00000373424,;UGT1A8,intron_variant,,ENST00000608381,;UGT1A7,intron_variant,,ENST00000373426,;UGT1A8,intron_variant,,ENST00000609637,;UGT1A8,intron_variant,,ENST00000609767,;UGT1A5,intron_variant,,ENST00000373414…	A	ENSG00000242515
UGT1A10	0	.	GRCh37	2	234678214	234678214	+	Intron	SNP	G	G	T	novel	.	SKCM primary		TCGA-EB-A24D-01A-11D-A197-08	TCGA-EB-A24D-10A-01D-A199-08	G	G	.	.	.	.	.	.	.	.	.	.	.	.	.	.	.	c.1295+1129G>T	.	.	ENST00000344644	.	28	24	4	23	23	0	UGT1A10,3_prime_UTR_variant,,ENST00000373445,;UGT1A8,3_prime_UTR_variant,,ENST00000360418,;UGT1A6,3_prime_UTR_variant,,ENST00000406651,;UGT1A4,intron_variant,,ENST00000373409,;UGT1A6,intron_variant,,ENST00000305139,;UGT1A3,intron_variant,,ENST00000482026,;UGT1A6,intron_variant,,ENST00000373424,;UGT1A8,intron_variant,,ENST00000608383,;UGT1A8,intron_variant,,ENST00000608381,;UGT1A7,intron_variant,,…	T	ENSG00000242515
UGT1A10	0	.	GRCh37	2	234678278	234678278	+	Intron	SNP	G	G	A	rs753289474	.	SKCM primary		TCGA-EB-A41A-01A-11D-A24R-08	TCGA-EB-A41A-10A-01D-A24R-08	G	G	.	.	.	.	.	.	.	.	.	.	.	.	.	.	.	c.1295+1193G>A	.	.	ENST00000344644	.	31	20	11	27	27	0	UGT1A10,3_prime_UTR_variant,,ENST00000373445,;UGT1A8,3_prime_UTR_variant,,ENST00000360418,;UGT1A6,3_prime_UTR_variant,,ENST00000406651,;UGT1A4,intron_variant,,ENST00000373409,;UGT1A6,intron_variant,,ENST00000305139,;UGT1A3,intron_variant,,ENST00000482026,;UGT1A6,intron_variant,,ENST00000373424,;UGT1A8,intron_variant,,ENST00000608383,;UGT1A8,intron_variant,,ENST00000608381,;UGT1A7,intron_variant,,…	A	ENSG00000242515
UGT1A10	0	.	GRCh37	2	234678279	234678279	+	Intron	SNP	G	G	A	novel	.	SKCM primary		TCGA-EB-A41A-01A-11D-A24R-08	TCGA-EB-A41A-10A-01D-A24R-08	G	G	.	.	.	.	.	.	.	.	.	.	.	.	.	.	.	c.1295+1194G>A	.	.	ENST00000344644	.	32	20	12	27	27	0	UGT1A10,3_prime_UTR_variant,,ENST00000373445,;UGT1A8,3_prime_UTR_variant,,ENST00000360418,;UGT1A6,3_prime_UTR_variant,,ENST00000406651,;UGT1A4,intron_variant,,ENST00000373409,;UGT1A6,intron_variant,,ENST00000305139,;UGT1A3,intron_variant,,ENST00000482026,;UGT1A6,intron_variant,,ENST00000373424,;UGT1A8,intron_variant,,ENST00000608383,;UGT1A8,intron_variant,,ENST00000608381,;UGT1A7,intron_variant,,…	A	ENSG00000242515
UGT1A10	0	.	GRCh37	2	234652078	234652078	+	Intron	SNP	G	G	A	rs779473501	.	SKCM primary		TCGA-EB-A551-01A-21D-A27K-08	TCGA-EB-A551-10A-01D-A27N-08	G	G	.	.	.	.	.	.	.	.	.	.	.	.	.	.	.	c.856-23602G>A	.	.	ENST00000344644	.	14	11	3	9	9	0	UGT1A10,intron_variant,,ENST00000373445,;UGT1A4,intron_variant,,ENST00000373409,;UGT1A6,intron_variant,,ENST00000305139,;UGT1A3,intron_variant,,ENST00000482026,;UGT1A6,intron_variant,,ENST00000373424,;UGT1A8,intron_variant,,ENST00000608381,;UGT1A7,intron_variant,,ENST00000373426,;UGT1A8,intron_variant,,ENST00000609637,;UGT1A8,intron_variant,,ENST00000609767,;UGT1A5,intron_variant,,ENST00000373414…	A	ENSG00000242515
UGT1A10	0	.	GRCh37	2	234652181	234652181	+	Intron	SNP	C	C	T	novel	.	SKCM primary		TCGA-IH-A3EA-01A-11D-A20D-08	TCGA-IH-A3EA-10A-01D-A20D-08	C	C	.	.	.	.	.	.	.	.	.	.	.	.	.	.	.	c.856-23499C>T	.	.	ENST00000344644	.	43	31	12	45	45	0	UGT1A10,intron_variant,,ENST00000373445,;UGT1A4,intron_variant,,ENST00000373409,;UGT1A6,intron_variant,,ENST00000305139,;UGT1A3,intron_variant,,ENST00000482026,;UGT1A6,intron_variant,,ENST00000373424,;UGT1A8,intron_variant,,ENST00000608381,;UGT1A7,intron_variant,,ENST00000373426,;UGT1A8,intron_variant,,ENST00000609637,;UGT1A8,intron_variant,,ENST00000609767,;UGT1A5,intron_variant,,ENST00000373414…	T	ENSG00000242515
UGT1A10	0	.	GRCh37	2	234652193	234652193	+	Intron	SNP	C	C	A	rs201114978	.	SKCM primary		TCGA-ER-A19K-01A-21D-A197-08	TCGA-ER-A19K-10A-01D-A199-08	C	C	.	.	.	.	.	.	.	.	.	.	.	.	.	.	.	c.856-23487C>A	.	.	ENST00000344644	.	33	30	3	74	74	0	UGT1A10,intron_variant,,ENST00000373445,;UGT1A4,intron_variant,,ENST00000373409,;UGT1A6,intron_variant,,ENST00000305139,;UGT1A3,intron_variant,,ENST00000482026,;UGT1A6,intron_variant,,ENST00000373424,;UGT1A8,intron_variant,,ENST00000608381,;UGT1A7,intron_variant,,ENST00000373426,;UGT1A8,intron_variant,,ENST00000609637,;UGT1A8,intron_variant,,ENST00000609767,;UGT1A5,intron_variant,,ENST00000373414…	A	ENSG00000242515
UGT1A10	0	.	GRCh37	2	234676567	234676567	+	Nonsense_Mutation	SNP	C	C	T	rs72551350	.	SKCM primary		TCGA-YG-AA3N-01A-11D-A38G-08	TCGA-YG-AA3N-10A-01D-A38J-08	C	C	.	.	.	.	.	.	.	.	.	.	.	.	.	.	.	c.1060C>T	p.Gln354Ter	p.Q354*	ENST00000344644	3/5	68	43	25	77	77	0	UGT1A10,stop_gained,p.Gln354Ter,ENST00000373445,;UGT1A4,stop_gained,p.Gln358Ter,ENST00000373409,;UGT1A6,stop_gained,p.Gln356Ter,ENST00000305139,;UGT1A3,stop_gained,p.Gln358Ter,ENST00000482026,;UGT1A6,stop_gained,p.Gln89Ter,ENST00000373424,;UGT1A8,stop_gained,p.Gln357Ter,ENST00000608383,;UGT1A8,stop_gained,p.Gln358Ter,ENST00000608381,;UGT1A7,stop_gained,p.Gln354Ter,ENST00000373426,;UGT1A8,stop_gai…	T	ENSG00000242515
UGT1A10	0	.	GRCh37	2	234652384	234652384	+	Intron	SNP	T	T	G	novel	.	SKCM-Metastatic		TCGA-3N-A9WD-06A-11D-A38G-08	TCGA-3N-A9WD-10A-01D-A38J-08	T	T	.	.	.	.	.	.	.	.	.	.	.	.	.	.	.	c.856-23296T>G	.	.	ENST00000344644	.	163	157	6	178	178	0	UGT1A10,intron_variant,,ENST00000373445,;UGT1A4,intron_variant,,ENST00000373409,;UGT1A6,intron_variant,,ENST00000305139,;UGT1A3,intron_variant,,ENST00000482026,;UGT1A6,intron_variant,,ENST00000373424,;UGT1A8,intron_variant,,ENST00000608381,;UGT1A7,intron_variant,,ENST00000373426,;UGT1A8,intron_variant,,ENST00000609637,;UGT1A8,intron_variant,,ENST00000609767,;UGT1A5,intron_variant,,ENST00000373414…	G	ENSG00000242515
UGT1A10	0	.	GRCh37	2	234652172	234652172	+	Intron	SNP	C	C	A	novel	.	SKCM-Metastatic		TCGA-D3-A1Q3-06A-11D-A196-08	TCGA-D3-A1Q3-10A-01D-A198-08	C	C	.	.	.	.	.	.	.	.	.	.	.	.	.	.	.	c.856-23508C>A	.	.	ENST00000344644	.	31	26	5	33	33	0	UGT1A10,intron_variant,,ENST00000373445,;UGT1A4,intron_variant,,ENST00000373409,;UGT1A6,intron_variant,,ENST00000305139,;UGT1A3,intron_variant,,ENST00000482026,;UGT1A6,intron_variant,,ENST00000373424,;UGT1A8,intron_variant,,ENST00000608381,;UGT1A7,intron_variant,,ENST00000373426,;UGT1A8,intron_variant,,ENST00000609637,;UGT1A8,intron_variant,,ENST00000609767,;UGT1A5,intron_variant,,ENST00000373414…	A	ENSG00000242515
UGT1A10	0	.	GRCh37	2	234545621	234545621	+	Missense_Mutation	SNP	T	T	A	.	.	SKCM-Metastatic		TCGA-D3-A2JD-06A-11D-A19A-08	TCGA-D3-A2JD-10A-01D-A19A-08	T	T	.	.	.	.	.	.	.	.	.	.	.	.	.	.	.	c.453T>A	p.Asp151Glu	p.D151E	ENST00000344644	1/5	90	75	15	140	140	0	UGT1A10,missense_variant,p.Asp151Glu,ENST00000373445,;UGT1A10,missense_variant,p.Asp151Glu,ENST00000344644,;UGT1A8,intron_variant,,ENST00000373450,;	A	ENSG00000242515
UGT1A10	0	.	GRCh37	2	234676946	234676946	+	Missense_Mutation	SNP	G	G	A	.	.	SKCM-Metastatic		TCGA-D3-A2JF-06A-11D-A196-08	TCGA-D3-A2JF-10A-01D-A198-08	G	G	.	.	.	.	.	.	.	.	.	.	.	.	.	.	.	c.1156G>A	p.Val386Met	p.V386M	ENST00000344644	4/5	115	85	30	153	153	0	UGT1A10,missense_variant,p.Val386Met,ENST00000373445,;UGT1A4,missense_variant,p.Val390Met,ENST00000373409,;UGT1A6,missense_variant,p.Val388Met,ENST00000305139,;UGT1A3,missense_variant,p.Val390Met,ENST00000482026,;UGT1A6,missense_variant,p.Val121Met,ENST00000373424,;UGT1A8,missense_variant,p.Val389Met,ENST00000608383,;UGT1A8,missense_variant,p.Val390Met,ENST00000608381,;UGT1A7,missense_variant,p.V…	A	ENSG00000242515
UGT1A10	0	.	GRCh37	2	234652078	234652078	+	Intron	SNP	G	G	A	rs779473501	.	SKCM-Metastatic		TCGA-D3-A51R-06A-11D-A25O-08	TCGA-D3-A51R-10A-01D-A25O-08	G	G	.	.	.	.	.	.	.	.	.	.	.	.	.	.	.	c.856-23602G>A	.	.	ENST00000344644	.	12	8	4	9	9	0	UGT1A10,intron_variant,,ENST00000373445,;UGT1A4,intron_variant,,ENST00000373409,;UGT1A6,intron_variant,,ENST00000305139,;UGT1A3,intron_variant,,ENST00000482026,;UGT1A6,intron_variant,,ENST00000373424,;UGT1A8,intron_variant,,ENST00000608381,;UGT1A7,intron_variant,,ENST00000373426,;UGT1A8,intron_variant,,ENST00000609637,;UGT1A8,intron_variant,,ENST00000609767,;UGT1A5,intron_variant,,ENST00000373414…	A	ENSG00000242515
UGT1A10	0	.	GRCh37	2	234676975	234676975	+	Missense_Mutation	SNP	G	G	A	.	.	SKCM-Metastatic		TCGA-D3-A51R-06A-11D-A25O-08	TCGA-D3-A51R-10A-01D-A25O-08	G	G	.	.	.	.	.	.	.	.	.	.	.	.	.	.	.	c.1185G>A	p.Met395Ile	p.M395I	ENST00000344644	4/5	55	31	24	36	36	0	UGT1A10,missense_variant,p.Met395Ile,ENST00000373445,;UGT1A4,missense_variant,p.Met399Ile,ENST00000373409,;UGT1A6,missense_variant,p.Met397Ile,ENST00000305139,;UGT1A3,missense_variant,p.Met399Ile,ENST00000482026,;UGT1A6,missense_variant,p.Met130Ile,ENST00000373424,;UGT1A8,missense_variant,p.Met398Ile,ENST00000608383,;UGT1A8,missense_variant,p.Met399Ile,ENST00000608381,;UGT1A7,missense_variant,p.M…	A	ENSG00000242515
UGT1A10	0	.	GRCh37	2	234678194	234678194	+	Intron	SNP	G	G	A	novel	.	SKCM-Metastatic		TCGA-D3-A5GO-06A-12D-A27K-08	TCGA-D3-A5GO-10A-01D-A27N-08	G	G	.	.	.	.	.	.	.	.	.	.	.	.	.	.	.	c.1295+1109G>A	.	.	ENST00000344644	.	50	33	17	63	62	0	UGT1A10,missense_variant,p.Gly438Glu,ENST00000373445,;UGT1A8,missense_variant,p.Gly441Glu,ENST00000360418,;UGT1A6,missense_variant,p.Gly173Glu,ENST00000406651,;UGT1A4,intron_variant,,ENST00000373409,;UGT1A6,intron_variant,,ENST00000305139,;UGT1A3,intron_variant,,ENST00000482026,;UGT1A6,intron_variant,,ENST00000373424,;UGT1A8,intron_variant,,ENST00000608383,;UGT1A8,intron_variant,,ENST00000608381,…	A	ENSG00000242515
UGT1A10	0	.	GRCh37	2	234652466	234652466	+	Intron	SNP	C	C	T	rs753368953	.	SKCM-Metastatic		TCGA-D3-A8GL-06A-11D-A372-08	TCGA-D3-A8GL-10A-01D-A375-08	C	C	.	.	.	.	.	.	.	.	.	.	.	.	.	.	.	c.856-23214C>T	.	.	ENST00000344644	.	122	67	55	132	132	0	UGT1A10,intron_variant,,ENST00000373445,;UGT1A4,intron_variant,,ENST00000373409,;UGT1A6,intron_variant,,ENST00000305139,;UGT1A3,intron_variant,,ENST00000482026,;UGT1A6,intron_variant,,ENST00000373424,;UGT1A8,intron_variant,,ENST00000608381,;UGT1A7,intron_variant,,ENST00000373426,;UGT1A8,intron_variant,,ENST00000609637,;UGT1A8,intron_variant,,ENST00000609767,;UGT1A5,intron_variant,,ENST00000373414…	T	ENSG00000242515
UGT1A10	0	.	GRCh37	2	234545613	234545613	+	Missense_Mutation	SNP	C	C	T	.	.	SKCM-Metastatic		TCGA-D3-A8GM-06A-11D-A372-08	TCGA-D3-A8GM-10A-01D-A375-08	C	C	.	.	.	.	.	.	.	.	.	.	.	.	.	.	.	c.445C>T	p.Pro149Ser	p.P149S	ENST00000344644	1/5	196	157	39	181	181	0	UGT1A10,missense_variant,p.Pro149Ser,ENST00000373445,;UGT1A10,missense_variant,p.Pro149Ser,ENST00000344644,;UGT1A8,intron_variant,,ENST00000373450,;	T	ENSG00000242515
UGT1A10	0	.	GRCh37	2	234545654	234545654	+	Silent	SNP	C	C	T	novel	.	SKCM-Metastatic		TCGA-D3-A8GM-06A-11D-A372-08	TCGA-D3-A8GM-10A-01D-A375-08	C	C	.	.	.	.	.	.	.	.	.	.	.	.	.	.	.	c.486C>T	p.%3D	p.S162S	ENST00000344644	1/5	206	106	100	207	207	0	UGT1A10,synonymous_variant,p.%3D,ENST00000373445,;UGT1A10,synonymous_variant,p.%3D,ENST00000344644,;UGT1A8,intron_variant,,ENST00000373450,;	T	ENSG00000242515
UGT1A10	0	.	GRCh37	2	234545895	234545895	+	Missense_Mutation	SNP	G	G	A	.	.	SKCM-Metastatic		TCGA-D3-A8GM-06A-11D-A372-08	TCGA-D3-A8GM-10A-01D-A375-08	G	G	.	.	.	.	.	.	.	.	.	.	.	.	.	.	.	c.727G>A	p.Asp243Asn	p.D243N	ENST00000344644	1/5	447	277	170	449	449	0	UGT1A10,missense_variant,p.Asp243Asn,ENST00000373445,;UGT1A10,missense_variant,p.Asp243Asn,ENST00000344644,;UGT1A8,intron_variant,,ENST00000373450,;	A	ENSG00000242515
UGT1A10	0	.	GRCh37	2	234676526	234676526	+	Missense_Mutation	SNP	C	C	T	rs144978321	.	SKCM-Metastatic		TCGA-D9-A1JW-06A-11D-A19A-08	TCGA-D9-A1JW-10A-01D-A19A-08	C	C	.	.	.	.	.	.	.	.	.	.	.	.	.	.	.	c.1019C>T	p.Ser340Leu	p.S340L	ENST00000344644	3/5	159	127	32	128	128	0	UGT1A10,missense_variant,p.Ser340Leu,ENST00000373445,;UGT1A4,missense_variant,p.Ser344Leu,ENST00000373409,;UGT1A6,missense_variant,p.Ser342Leu,ENST00000305139,;UGT1A3,missense_variant,p.Ser344Leu,ENST00000482026,;UGT1A6,missense_variant,p.Ser75Leu,ENST00000373424,;UGT1A8,missense_variant,p.Ser343Leu,ENST00000608383,;UGT1A8,missense_variant,p.Ser344Leu,ENST00000608381,;UGT1A7,missense_variant,p.Se…	T	ENSG00000242515
UGT1A10	0	.	GRCh37	2	234652393	234652393	+	Intron	SNP	G	G	A	rs370175895	.	SKCM-Metastatic		TCGA-D9-A6EA-06A-11D-A30X-08	TCGA-D9-A6EA-10A-01D-A30X-08	G	G	.	.	.	.	.	.	.	.	.	.	.	.	.	.	.	c.856-23287G>A	.	.	ENST00000344644	.	199	128	71	331	330	0	UGT1A10,intron_variant,,ENST00000373445,;UGT1A4,intron_variant,,ENST00000373409,;UGT1A6,intron_variant,,ENST00000305139,;UGT1A3,intron_variant,,ENST00000482026,;UGT1A6,intron_variant,,ENST00000373424,;UGT1A8,intron_variant,,ENST00000608381,;UGT1A7,intron_variant,,ENST00000373426,;UGT1A8,intron_variant,,ENST00000609637,;UGT1A8,intron_variant,,ENST00000609767,;UGT1A5,intron_variant,,ENST00000373414…	A	ENSG00000242515
UGT1A10	0	.	GRCh37	2	234545679	234545679	+	Missense_Mutation	SNP	G	G	A	novel	.	SKCM-Metastatic		TCGA-D9-A6EC-06A-11D-A30X-08	TCGA-D9-A6EC-10A-01D-A30X-08	G	G	.	.	.	.	.	.	.	.	.	.	.	.	.	.	.	c.511G>A	p.Gly171Arg	p.G171R	ENST00000344644	1/5	121	99	22	183	183	0	UGT1A10,missense_variant,p.Gly171Arg,ENST00000373445,;UGT1A10,missense_variant,p.Gly171Arg,ENST00000344644,;UGT1A8,intron_variant,,ENST00000373450,;	A	ENSG00000242515
UGT1A10	0	.	GRCh37	2	234652123	234652123	+	Intron	SNP	A	A	T	novel	.	SKCM-Metastatic		TCGA-D9-A6EC-06A-11D-A30X-08	TCGA-D9-A6EC-10A-01D-A30X-08	A	A	.	.	.	.	.	.	.	.	.	.	.	.	.	.	.	c.856-23557A>T	.	.	ENST00000344644	.	28	20	8	37	37	0	UGT1A10,intron_variant,,ENST00000373445,;UGT1A4,intron_variant,,ENST00000373409,;UGT1A6,intron_variant,,ENST00000305139,;UGT1A3,intron_variant,,ENST00000482026,;UGT1A6,intron_variant,,ENST00000373424,;UGT1A8,intron_variant,,ENST00000608381,;UGT1A7,intron_variant,,ENST00000373426,;UGT1A8,intron_variant,,ENST00000609637,;UGT1A8,intron_variant,,ENST00000609767,;UGT1A5,intron_variant,,ENST00000373414…	T	ENSG00000242515
UGT1A10	0	.	GRCh37	2	234652376	234652376	+	Intron	SNP	C	C	T	rs189214805	.	SKCM-Metastatic		TCGA-D9-A6EC-06A-11D-A30X-08	TCGA-D9-A6EC-10A-01D-A30X-08	C	C	.	.	.	.	.	.	.	.	.	.	.	.	.	.	.	c.856-23304C>T	.	.	ENST00000344644	.	238	154	83	313	313	0	UGT1A10,intron_variant,,ENST00000373445,;UGT1A4,intron_variant,,ENST00000373409,;UGT1A6,intron_variant,,ENST00000305139,;UGT1A3,intron_variant,,ENST00000482026,;UGT1A6,intron_variant,,ENST00000373424,;UGT1A8,intron_variant,,ENST00000608381,;UGT1A7,intron_variant,,ENST00000373426,;UGT1A8,intron_variant,,ENST00000609637,;UGT1A8,intron_variant,,ENST00000609767,;UGT1A5,intron_variant,,ENST00000373414…	T	ENSG00000242515
UGT1A10	0	.	GRCh37	2	234545613	234545613	+	Missense_Mutation	SNP	C	C	T	.	.	SKCM-Metastatic		TCGA-EE-A181-06A-11D-A196-08	TCGA-EE-A181-10A-01D-A198-08	C	C	.	.	.	.	.	.	.	.	.	.	.	.	.	.	.	c.445C>T	p.Pro149Ser	p.P149S	ENST00000344644	1/5	96	53	42	125	124	0	UGT1A10,missense_variant,p.Pro149Ser,ENST00000373445,;UGT1A10,missense_variant,p.Pro149Ser,ENST00000344644,;UGT1A8,intron_variant,,ENST00000373450,;	T	ENSG00000242515
UGT1A10	0	.	GRCh37	2	234652242	234652242	+	Intron	SNP	C	C	A	novel	.	SKCM-Metastatic		TCGA-EE-A181-06A-11D-A196-08	TCGA-EE-A181-10A-01D-A198-08	C	C	.	.	.	.	.	.	.	.	.	.	.	.	.	.	.	c.856-23438C>A	.	.	ENST00000344644	.	57	52	5	88	88	0	UGT1A10,intron_variant,,ENST00000373445,;UGT1A4,intron_variant,,ENST00000373409,;UGT1A6,intron_variant,,ENST00000305139,;UGT1A3,intron_variant,,ENST00000482026,;UGT1A6,intron_variant,,ENST00000373424,;UGT1A8,intron_variant,,ENST00000608381,;UGT1A7,intron_variant,,ENST00000373426,;UGT1A8,intron_variant,,ENST00000609637,;UGT1A8,intron_variant,,ENST00000609767,;UGT1A5,intron_variant,,ENST00000373414…	A	ENSG00000242515
UGT1A10	0	.	GRCh37	2	234652560	234652560	+	Intron	SNP	C	C	A	rs201448352	.	SKCM-Metastatic		TCGA-EE-A181-06A-11D-A196-08	TCGA-EE-A181-10A-01D-A198-08	C	C	.	.	.	.	.	.	.	.	.	.	.	.	.	.	.	c.856-23120C>A	.	.	ENST00000344644	.	24	21	3	29	29	0	UGT1A10,intron_variant,,ENST00000373445,;UGT1A4,intron_variant,,ENST00000373409,;UGT1A6,intron_variant,,ENST00000305139,;UGT1A3,intron_variant,,ENST00000482026,;UGT1A6,intron_variant,,ENST00000373424,;UGT1A8,intron_variant,,ENST00000608381,;UGT1A7,intron_variant,,ENST00000373426,;UGT1A8,intron_variant,,ENST00000609637,;UGT1A8,intron_variant,,ENST00000609767,;UGT1A5,intron_variant,,ENST00000373414…	A	ENSG00000242515
UGT1A10	0	.	GRCh37	2	234678180	234678180	+	Intron	SNP	G	G	A	rs752305202	.	SKCM-Metastatic		TCGA-EE-A182-06A-11D-A196-08	TCGA-EE-A182-10A-01D-A198-08	G	G	.	.	.	.	.	.	.	.	.	.	.	.	.	.	.	c.1295+1095G>A	.	.	ENST00000344644	.	56	35	21	55	55	0	UGT1A10,synonymous_variant,p.%3D,ENST00000373445,;UGT1A8,synonymous_variant,p.%3D,ENST00000360418,;UGT1A6,synonymous_variant,p.%3D,ENST00000406651,;UGT1A4,intron_variant,,ENST00000373409,;UGT1A6,intron_variant,,ENST00000305139,;UGT1A3,intron_variant,,ENST00000482026,;UGT1A6,intron_variant,,ENST00000373424,;UGT1A8,intron_variant,,ENST00000608383,;UGT1A8,intron_variant,,ENST00000608381,;UGT1A7,intr…	A	ENSG00000242515
UGT1A10	0	.	GRCh37	2	234545727	234545727	+	Missense_Mutation	SNP	C	C	T	rs756851448	.	SKCM-Metastatic		TCGA-EE-A20C-06A-11D-A196-08	TCGA-EE-A20C-10A-01D-A198-08	C	C	.	.	.	.	.	.	.	.	.	.	.	.	.	.	.	c.559C>T	p.Leu187Phe	p.L187F	ENST00000344644	1/5	128	50	78	202	202	0	UGT1A10,missense_variant,p.Leu187Phe,ENST00000373445,;UGT1A10,missense_variant,p.Leu187Phe,ENST00000344644,;UGT1A8,intron_variant,,ENST00000373450,;	T	ENSG00000242515
UGT1A10	0	.	GRCh37	2	234545403	234545403	+	Missense_Mutation	SNP	A	A	G	.	.	SKCM-Metastatic		TCGA-EE-A29D-06A-11D-A197-08	TCGA-EE-A29D-10A-01D-A199-08	A	A	.	.	.	.	.	.	.	.	.	.	.	.	.	.	.	c.235A>G	p.Thr79Ala	p.T79A	ENST00000344644	1/5	73	60	13	125	125	0	UGT1A10,missense_variant,p.Thr79Ala,ENST00000373445,;UGT1A10,missense_variant,p.Thr79Ala,ENST00000344644,;UGT1A8,intron_variant,,ENST00000373450,;	G	ENSG00000242515
UGT1A10	0	.	GRCh37	2	234545533	234545533	+	Missense_Mutation	SNP	C	C	T	rs145610800	.	SKCM-Metastatic		TCGA-EE-A29E-06A-11D-A197-08	TCGA-EE-A29E-10A-01D-A199-08	C	C	.	.	.	.	.	.	.	.	.	.	.	.	.	.	.	c.365C>T	p.Ser122Leu	p.S122L	ENST00000344644	1/5	135	88	46	153	153	0	UGT1A10,missense_variant,p.Ser122Leu,ENST00000373445,;UGT1A10,missense_variant,p.Ser122Leu,ENST00000344644,;UGT1A8,intron_variant,,ENST00000373450,;	T	ENSG00000242515
UGT1A10	0	.	GRCh37	2	234652218	234652218	+	Intron	SNP	C	C	T	novel	.	SKCM-Metastatic		TCGA-EE-A29E-06A-11D-A197-08	TCGA-EE-A29E-10A-01D-A199-08	C	C	.	.	.	.	.	.	.	.	.	.	.	.	.	.	.	c.856-23462C>T	.	.	ENST00000344644	.	51	32	19	67	67	0	UGT1A10,intron_variant,,ENST00000373445,;UGT1A4,intron_variant,,ENST00000373409,;UGT1A6,intron_variant,,ENST00000305139,;UGT1A3,intron_variant,,ENST00000482026,;UGT1A6,intron_variant,,ENST00000373424,;UGT1A8,intron_variant,,ENST00000608381,;UGT1A7,intron_variant,,ENST00000373426,;UGT1A8,intron_variant,,ENST00000609637,;UGT1A8,intron_variant,,ENST00000609767,;UGT1A5,intron_variant,,ENST00000373414…	T	ENSG00000242515
UGT1A10	0	.	GRCh37	2	234545426	234545426	+	Silent	SNP	G	G	A	.	.	SKCM-Metastatic		TCGA-EE-A29L-06A-12D-A196-08	TCGA-EE-A29L-10A-01D-A198-08	G	G	.	.	.	.	.	.	.	.	.	.	.	.	.	.	.	c.258G>A	p.%3D	p.Q86Q	ENST00000344644	1/5	125	97	28	100	100	0	UGT1A10,synonymous_variant,p.%3D,ENST00000373445,;UGT1A10,synonymous_variant,p.%3D,ENST00000344644,;UGT1A8,intron_variant,,ENST00000373450,;	A	ENSG00000242515
UGT1A10	0	.	GRCh37	2	234545582	234545582	+	Silent	SNP	G	G	A	.	.	SKCM-Metastatic		TCGA-EE-A2A0-06A-11D-A196-08	TCGA-EE-A2A0-10A-01D-A198-08	G	G	.	.	.	.	.	.	.	.	.	.	.	.	.	.	.	c.414G>A	p.%3D	p.K138K	ENST00000344644	1/5	142	120	21	107	107	0	UGT1A10,synonymous_variant,p.%3D,ENST00000373445,;UGT1A10,synonymous_variant,p.%3D,ENST00000344644,;UGT1A8,intron_variant,,ENST00000373450,;	A	ENSG00000242515
UGT1A10	0	.	GRCh37	2	234545462	234545462	+	Nonsense_Mutation	SNP	G	G	A	rs559725558	.	SKCM-Metastatic		TCGA-EE-A2GC-06A-11D-A197-08	TCGA-EE-A2GC-10A-01D-A199-08	G	G	.	.	.	.	.	.	.	.	.	.	.	.	.	.	.	c.294G>A	p.Trp98Ter	p.W98*	ENST00000344644	1/5	106	87	19	179	179	0	UGT1A10,stop_gained,p.Trp98Ter,ENST00000373445,;UGT1A10,stop_gained,p.Trp98Ter,ENST00000344644,;UGT1A8,intron_variant,,ENST00000373450,;	A	ENSG00000242515
UGT1A10	0	.	GRCh37	2	234652119	234652119	+	Intron	SNP	G	G	A	novel	.	SKCM-Metastatic		TCGA-EE-A2GC-06A-11D-A197-08	TCGA-EE-A2GC-10A-01D-A199-08	G	G	.	.	.	.	.	.	.	.	.	.	.	.	.	.	.	c.856-23561G>A	.	.	ENST00000344644	.	22	13	8	41	41	0	UGT1A10,intron_variant,,ENST00000373445,;UGT1A4,intron_variant,,ENST00000373409,;UGT1A6,intron_variant,,ENST00000305139,;UGT1A3,intron_variant,,ENST00000482026,;UGT1A6,intron_variant,,ENST00000373424,;UGT1A8,intron_variant,,ENST00000608381,;UGT1A7,intron_variant,,ENST00000373426,;UGT1A8,intron_variant,,ENST00000609637,;UGT1A8,intron_variant,,ENST00000609767,;UGT1A5,intron_variant,,ENST00000373414…	A	ENSG00000242515
UGT1A10	0	.	GRCh37	2	234652226	234652226	+	Intron	SNP	C	C	T	novel	.	SKCM-Metastatic		TCGA-EE-A2GC-06A-11D-A197-08	TCGA-EE-A2GC-10A-01D-A199-08	C	C	.	.	.	.	.	.	.	.	.	.	.	.	.	.	.	c.856-23454C>T	.	.	ENST00000344644	.	73	55	17	98	98	0	UGT1A10,intron_variant,,ENST00000373445,;UGT1A4,intron_variant,,ENST00000373409,;UGT1A6,intron_variant,,ENST00000305139,;UGT1A3,intron_variant,,ENST00000482026,;UGT1A6,intron_variant,,ENST00000373424,;UGT1A8,intron_variant,,ENST00000608381,;UGT1A7,intron_variant,,ENST00000373426,;UGT1A8,intron_variant,,ENST00000609637,;UGT1A8,intron_variant,,ENST00000609767,;UGT1A5,intron_variant,,ENST00000373414…	T	ENSG00000242515
UGT1A10	0	.	GRCh37	2	234678194	234678194	+	Intron	SNP	G	G	A	novel	.	SKCM-Metastatic		TCGA-EE-A2GI-06A-11D-A196-08	TCGA-EE-A2GI-10A-01D-A198-08	G	G	.	.	.	.	.	.	.	.	.	.	.	.	.	.	.	c.1295+1109G>A	.	.	ENST00000344644	.	41	33	8	55	55	0	UGT1A10,missense_variant,p.Gly438Glu,ENST00000373445,;UGT1A8,missense_variant,p.Gly441Glu,ENST00000360418,;UGT1A6,missense_variant,p.Gly173Glu,ENST00000406651,;UGT1A4,intron_variant,,ENST00000373409,;UGT1A6,intron_variant,,ENST00000305139,;UGT1A3,intron_variant,,ENST00000482026,;UGT1A6,intron_variant,,ENST00000373424,;UGT1A8,intron_variant,,ENST00000608383,;UGT1A8,intron_variant,,ENST00000608381,…	A	ENSG00000242515
UGT1A10	0	.	GRCh37	2	234652306	234652306	+	Intron	SNP	G	G	A	novel	.	SKCM-Metastatic		TCGA-EE-A2GM-06B-11D-A196-08	TCGA-EE-A2GM-10A-01D-A198-08	G	G	.	.	.	.	.	.	.	.	.	.	.	.	.	.	.	c.856-23374G>A	.	.	ENST00000344644	.	160	63	96	82	82	0	UGT1A10,intron_variant,,ENST00000373445,;UGT1A4,intron_variant,,ENST00000373409,;UGT1A6,intron_variant,,ENST00000305139,;UGT1A3,intron_variant,,ENST00000482026,;UGT1A6,intron_variant,,ENST00000373424,;UGT1A8,intron_variant,,ENST00000608381,;UGT1A7,intron_variant,,ENST00000373426,;UGT1A8,intron_variant,,ENST00000609637,;UGT1A8,intron_variant,,ENST00000609767,;UGT1A5,intron_variant,,ENST00000373414…	A	ENSG00000242515
UGT1A10	0	.	GRCh37	2	234676545	234676545	+	Silent	SNP	G	G	A	rs377501831	.	SKCM-Metastatic		TCGA-EE-A2GM-06B-11D-A196-08	TCGA-EE-A2GM-10A-01D-A198-08	G	G	.	.	.	.	.	.	.	.	.	.	.	.	.	.	.	c.1038G>A	p.%3D	p.T346T	ENST00000344644	3/5	177	51	126	142	142	0	UGT1A10,synonymous_variant,p.%3D,ENST00000373445,;UGT1A4,synonymous_variant,p.%3D,ENST00000373409,;UGT1A6,synonymous_variant,p.%3D,ENST00000305139,;UGT1A3,synonymous_variant,p.%3D,ENST00000482026,;UGT1A6,synonymous_variant,p.%3D,ENST00000373424,;UGT1A8,synonymous_variant,p.%3D,ENST00000608383,;UGT1A8,synonymous_variant,p.%3D,ENST00000608381,;UGT1A7,synonymous_variant,p.%3D,ENST00000373426,;UGT1A8…	A	ENSG00000242515
UGT1A10	0	.	GRCh37	2	234545322	234545322	+	Missense_Mutation	SNP	G	G	A	.	.	SKCM-Metastatic		TCGA-EE-A2GO-06A-11D-A196-08	TCGA-EE-A2GO-10A-01D-A198-08	G	G	.	.	.	.	.	.	.	.	.	.	.	.	.	.	.	c.154G>A	p.Gly52Arg	p.G52R	ENST00000344644	1/5	21	12	9	55	55	0	UGT1A10,missense_variant,p.Gly52Arg,ENST00000373445,;UGT1A10,missense_variant,p.Gly52Arg,ENST00000344644,;UGT1A8,intron_variant,,ENST00000373450,;	A	ENSG00000242515
UGT1A10	0	.	GRCh37	2	234545731	234545731	+	Missense_Mutation	SNP	C	C	T	.	.	SKCM-Metastatic		TCGA-EE-A2GO-06A-11D-A196-08	TCGA-EE-A2GO-10A-01D-A198-08	C	C	.	.	.	.	.	.	.	.	.	.	.	.	.	.	.	c.563C>T	p.Ser188Phe	p.S188F	ENST00000344644	1/5	37	22	15	148	148	0	UGT1A10,missense_variant,p.Ser188Phe,ENST00000373445,;UGT1A10,missense_variant,p.Ser188Phe,ENST00000344644,;UGT1A8,intron_variant,,ENST00000373450,;	T	ENSG00000242515
UGT1A10	0	.	GRCh37	2	234677029	234677029	+	Silent	SNP	G	G	A	.	.	SKCM-Metastatic		TCGA-EE-A2GO-06A-11D-A196-08	TCGA-EE-A2GO-10A-01D-A198-08	G	G	.	.	.	.	.	.	.	.	.	.	.	.	.	.	.	c.1239G>A	p.%3D	p.L413L	ENST00000344644	4/5	74	41	33	40	40	0	UGT1A10,synonymous_variant,p.%3D,ENST00000373445,;UGT1A4,synonymous_variant,p.%3D,ENST00000373409,;UGT1A6,synonymous_variant,p.%3D,ENST00000305139,;UGT1A3,synonymous_variant,p.%3D,ENST00000482026,;UGT1A6,synonymous_variant,p.%3D,ENST00000373424,;UGT1A8,synonymous_variant,p.%3D,ENST00000608383,;UGT1A8,synonymous_variant,p.%3D,ENST00000608381,;UGT1A7,synonymous_variant,p.%3D,ENST00000373426,;UGT1A8…	A	ENSG00000242515
UGT1A10	0	.	GRCh37	2	234678299	234678299	+	Intron	SNP	C	C	T	novel	.	SKCM-Metastatic		TCGA-EE-A2GP-06A-11D-A197-08	TCGA-EE-A2GP-10A-01D-A199-08	C	C	.	.	.	.	.	.	.	.	.	.	.	.	.	.	.	c.1295+1214C>T	.	.	ENST00000344644	.	16	5	11	10	10	0	UGT1A10,3_prime_UTR_variant,,ENST00000373445,;UGT1A8,3_prime_UTR_variant,,ENST00000360418,;UGT1A6,3_prime_UTR_variant,,ENST00000406651,;UGT1A4,intron_variant,,ENST00000373409,;UGT1A6,intron_variant,,ENST00000305139,;UGT1A3,intron_variant,,ENST00000482026,;UGT1A6,intron_variant,,ENST00000373424,;UGT1A8,intron_variant,,ENST00000608383,;UGT1A8,intron_variant,,ENST00000608381,;UGT1A7,intron_variant,,…	T	ENSG00000242515
UGT1A10	0	.	GRCh37	2	234652280	234652280	+	Intron	SNP	C	C	T	rs776464072	.	SKCM-Metastatic		TCGA-EE-A2GU-06A-11D-A196-08	TCGA-EE-A2GU-10A-01D-A198-08	C	C	.	.	.	.	.	.	.	.	.	.	.	.	.	.	.	c.856-23400C>T	.	.	ENST00000344644	.	136	98	37	133	133	0	UGT1A10,intron_variant,,ENST00000373445,;UGT1A4,intron_variant,,ENST00000373409,;UGT1A6,intron_variant,,ENST00000305139,;UGT1A3,intron_variant,,ENST00000482026,;UGT1A6,intron_variant,,ENST00000373424,;UGT1A8,intron_variant,,ENST00000608381,;UGT1A7,intron_variant,,ENST00000373426,;UGT1A8,intron_variant,,ENST00000609637,;UGT1A8,intron_variant,,ENST00000609767,;UGT1A5,intron_variant,,ENST00000373414…	T	ENSG00000242515
UGT1A10	0	.	GRCh37	2	234652190	234652190	+	Intron	SNP	C	C	T	novel	.	SKCM-Metastatic		TCGA-EE-A2M5-06A-12D-A197-08	TCGA-EE-A2M5-10A-01D-A199-08	C	C	.	.	.	.	.	.	.	.	.	.	.	.	.	.	.	c.856-23490C>T	.	.	ENST00000344644	.	44	30	13	49	48	1	UGT1A10,intron_variant,,ENST00000373445,;UGT1A4,intron_variant,,ENST00000373409,;UGT1A6,intron_variant,,ENST00000305139,;UGT1A3,intron_variant,,ENST00000482026,;UGT1A6,intron_variant,,ENST00000373424,;UGT1A8,intron_variant,,ENST00000608381,;UGT1A7,intron_variant,,ENST00000373426,;UGT1A8,intron_variant,,ENST00000609637,;UGT1A8,intron_variant,,ENST00000609767,;UGT1A5,intron_variant,,ENST00000373414…	T	ENSG00000242515
UGT1A10	0	.	GRCh37	2	234652431	234652431	+	Intron	SNP	C	C	T	rs374115440	.	SKCM-Metastatic		TCGA-EE-A2MJ-06A-11D-A197-08	TCGA-EE-A2MJ-10A-01D-A199-08	C	C	.	.	.	.	.	.	.	.	.	.	.	.	.	.	.	c.856-23249C>T	.	.	ENST00000344644	.	178	161	16	170	169	1	UGT1A10,intron_variant,,ENST00000373445,;UGT1A4,intron_variant,,ENST00000373409,;UGT1A6,intron_variant,,ENST00000305139,;UGT1A3,intron_variant,,ENST00000482026,;UGT1A6,intron_variant,,ENST00000373424,;UGT1A8,intron_variant,,ENST00000608381,;UGT1A7,intron_variant,,ENST00000373426,;UGT1A8,intron_variant,,ENST00000609637,;UGT1A8,intron_variant,,ENST00000609767,;UGT1A5,intron_variant,,ENST00000373414…	T	ENSG00000242515
UGT1A10	0	.	GRCh37	2	234545533	234545533	+	Missense_Mutation	SNP	C	C	T	rs145610800	.	SKCM-Metastatic		TCGA-EE-A2MR-06A-11D-A196-08	TCGA-EE-A2MR-10A-01D-A198-08	C	C	.	.	.	.	.	.	.	.	.	.	.	.	.	.	.	c.365C>T	p.Ser122Leu	p.S122L	ENST00000344644	1/5	43	39	4	159	158	1	UGT1A10,missense_variant,p.Ser122Leu,ENST00000373445,;UGT1A10,missense_variant,p.Ser122Leu,ENST00000344644,;UGT1A8,intron_variant,,ENST00000373450,;	T	ENSG00000242515
UGT1A10	0	.	GRCh37	2	234545607	234545607	+	Silent	SNP	C	C	T	.	.	SKCM-Metastatic		TCGA-EE-A2MR-06A-11D-A196-08	TCGA-EE-A2MR-10A-01D-A198-08	C	C	.	.	.	.	.	.	.	.	.	.	.	.	.	.	.	c.439C>T	p.%3D	p.L147L	ENST00000344644	1/5	66	57	9	170	170	0	UGT1A10,synonymous_variant,p.%3D,ENST00000373445,;UGT1A10,synonymous_variant,p.%3D,ENST00000344644,;UGT1A8,intron_variant,,ENST00000373450,;	T	ENSG00000242515
UGT1A10	0	.	GRCh37	2	234545659	234545659	+	Missense_Mutation	SNP	C	C	T	rs144666294	.	SKCM-Metastatic		TCGA-EE-A2MS-06A-11D-A197-08	TCGA-EE-A2MS-10A-01D-A199-08	C	C	.	.	.	.	.	.	.	.	.	.	.	.	.	.	.	c.491C>T	p.Pro164Leu	p.P164L	ENST00000344644	1/5	116	79	37	148	148	0	UGT1A10,missense_variant,p.Pro164Leu,ENST00000373445,;UGT1A10,missense_variant,p.Pro164Leu,ENST00000344644,;UGT1A8,intron_variant,,ENST00000373450,;	T	ENSG00000242515
UGT1A10	0	.	GRCh37	2	234678214	234678214	+	Intron	SNP	G	G	T	novel	.	SKCM-Metastatic		TCGA-EE-A3AA-06A-11D-A196-08	TCGA-EE-A3AA-10A-01D-A198-08	G	G	.	.	.	.	.	.	.	.	.	.	.	.	.	.	.	c.1295+1129G>T	.	.	ENST00000344644	.	38	34	3	54	54	0	UGT1A10,3_prime_UTR_variant,,ENST00000373445,;UGT1A8,3_prime_UTR_variant,,ENST00000360418,;UGT1A6,3_prime_UTR_variant,,ENST00000406651,;UGT1A4,intron_variant,,ENST00000373409,;UGT1A6,intron_variant,,ENST00000305139,;UGT1A3,intron_variant,,ENST00000482026,;UGT1A6,intron_variant,,ENST00000373424,;UGT1A8,intron_variant,,ENST00000608383,;UGT1A8,intron_variant,,ENST00000608381,;UGT1A7,intron_variant,,…	T	ENSG00000242515
UGT1A10	0	.	GRCh37	2	234652230	234652230	+	Intron	SNP	G	G	A	novel	.	SKCM-Metastatic		TCGA-EE-A3AC-06A-11D-A196-08	TCGA-EE-A3AC-10A-01D-A198-08	G	G	.	.	.	.	.	.	.	.	.	.	.	.	.	.	.	c.856-23450G>A	.	.	ENST00000344644	.	78	50	28	87	87	0	UGT1A10,intron_variant,,ENST00000373445,;UGT1A4,intron_variant,,ENST00000373409,;UGT1A6,intron_variant,,ENST00000305139,;UGT1A3,intron_variant,,ENST00000482026,;UGT1A6,intron_variant,,ENST00000373424,;UGT1A8,intron_variant,,ENST00000608381,;UGT1A7,intron_variant,,ENST00000373426,;UGT1A8,intron_variant,,ENST00000609637,;UGT1A8,intron_variant,,ENST00000609767,;UGT1A5,intron_variant,,ENST00000373414…	A	ENSG00000242515
UGT1A10	0	.	GRCh37	2	234652119	234652119	+	Intron	SNP	G	G	T	novel	.	SKCM-Metastatic		TCGA-EE-A3AD-06A-11D-A196-08	TCGA-EE-A3AD-10A-01D-A198-08	G	G	.	.	.	.	.	.	.	.	.	.	.	.	.	.	.	c.856-23561G>T	.	.	ENST00000344644	.	34	29	4	26	26	0	UGT1A10,intron_variant,,ENST00000373445,;UGT1A4,intron_variant,,ENST00000373409,;UGT1A6,intron_variant,,ENST00000305139,;UGT1A3,intron_variant,,ENST00000482026,;UGT1A6,intron_variant,,ENST00000373424,;UGT1A8,intron_variant,,ENST00000608381,;UGT1A7,intron_variant,,ENST00000373426,;UGT1A8,intron_variant,,ENST00000609637,;UGT1A8,intron_variant,,ENST00000609767,;UGT1A5,intron_variant,,ENST00000373414…	T	ENSG00000242515
UGT1A10	0	.	GRCh37	2	234675725	234675725	+	Missense_Mutation	SNP	G	G	A	.	.	SKCM-Metastatic		TCGA-ER-A19M-06A-61D-A23B-08	TCGA-ER-A19M-10A-01D-A23B-08	G	G	.	.	.	.	.	.	.	.	.	.	.	.	.	.	.	c.901G>A	p.Val301Ile	p.V301I	ENST00000344644	2/5	57	44	13	136	136	0	UGT1A10,missense_variant,p.Val301Ile,ENST00000373445,;UGT1A4,missense_variant,p.Val305Ile,ENST00000373409,;UGT1A6,missense_variant,p.Val303Ile,ENST00000305139,;UGT1A3,missense_variant,p.Val305Ile,ENST00000482026,;UGT1A6,missense_variant,p.Val36Ile,ENST00000373424,;UGT1A8,missense_variant,p.Val304Ile,ENST00000608383,;UGT1A8,missense_variant,p.Val305Ile,ENST00000608381,;UGT1A7,missense_variant,p.Va…	A	ENSG00000242515
UGT1A10	0	.	GRCh37	2	234545303	234545303	+	Silent	SNP	G	G	T	rs763801356	.	SKCM-Metastatic		TCGA-ER-A19P-06A-11D-A196-08	TCGA-ER-A19P-10A-01D-A198-08	G	G	.	.	.	.	.	.	.	.	.	.	.	.	.	.	.	c.135G>T	p.%3D	p.V45V	ENST00000344644	1/5	63	57	6	69	69	0	UGT1A10,synonymous_variant,p.%3D,ENST00000373445,;UGT1A10,synonymous_variant,p.%3D,ENST00000344644,;UGT1A8,intron_variant,,ENST00000373450,;	T	ENSG00000242515
UGT1A10	0	.	GRCh37	2	234545667	234545667	+	Missense_Mutation	SNP	G	G	A	rs201239672	.	SKCM-Metastatic		TCGA-ER-A42L-06A-11D-A24R-08	TCGA-ER-A42L-10A-01D-A24R-08	G	G	.	.	.	.	.	.	.	.	.	.	.	.	.	.	.	c.499G>A	p.Val167Ile	p.V167I	ENST00000344644	1/5	264	223	41	208	208	0	UGT1A10,missense_variant,p.Val167Ile,ENST00000373445,;UGT1A10,missense_variant,p.Val167Ile,ENST00000344644,;UGT1A8,intron_variant,,ENST00000373450,;	A	ENSG00000242515
UGT1A10	0	.	GRCh37	2	234545975	234545975	+	Missense_Mutation	SNP	G	G	A	.	.	SKCM-Metastatic		TCGA-FR-A3YN-06A-11D-A23B-08	TCGA-FR-A3YN-10A-01D-A23B-08	G	G	.	.	.	.	.	.	.	.	.	.	.	.	.	.	.	c.807G>A	p.Met269Ile	p.M269I	ENST00000344644	1/5	592	316	276	369	369	0	UGT1A10,missense_variant,p.Met269Ile,ENST00000373445,;UGT1A10,missense_variant,p.Met269Ile,ENST00000344644,;UGT1A8,intron_variant,,ENST00000373450,;	A	ENSG00000242515
UGT1A10	0	.	GRCh37	2	234545582	234545582	+	Silent	SNP	G	G	A	.	.	SKCM-Metastatic		TCGA-FR-A69P-06A-21D-A30X-08	TCGA-FR-A69P-10A-01D-A30X-08	G	G	.	.	.	.	.	.	.	.	.	.	.	.	.	.	.	c.414G>A	p.%3D	p.K138K	ENST00000344644	1/5	108	44	63	134	134	0	UGT1A10,synonymous_variant,p.%3D,ENST00000373445,;UGT1A10,synonymous_variant,p.%3D,ENST00000344644,;UGT1A8,intron_variant,,ENST00000373450,;	A	ENSG00000242515
UGT1A10	0	.	GRCh37	2	234652078	234652078	+	Intron	SNP	G	G	A	rs779473501	.	SKCM-Metastatic		TCGA-FR-A7U9-06A-11D-A34U-08	TCGA-FR-A7U9-10A-01D-A34X-08	G	G	.	.	.	.	.	.	.	.	.	.	.	.	.	.	.	c.856-23602G>A	.	.	ENST00000344644	.	11	8	3	20	20	0	UGT1A10,intron_variant,,ENST00000373445,;UGT1A4,intron_variant,,ENST00000373409,;UGT1A6,intron_variant,,ENST00000305139,;UGT1A3,intron_variant,,ENST00000482026,;UGT1A6,intron_variant,,ENST00000373424,;UGT1A8,intron_variant,,ENST00000608381,;UGT1A7,intron_variant,,ENST00000373426,;UGT1A8,intron_variant,,ENST00000609637,;UGT1A8,intron_variant,,ENST00000609767,;UGT1A5,intron_variant,,ENST00000373414…	A	ENSG00000242515
UGT1A10	0	.	GRCh37	2	234652429	234652429	+	Intron	SNP	C	C	T	rs781656153	.	SKCM-Metastatic		TCGA-FR-A7U9-06A-11D-A34U-08	TCGA-FR-A7U9-10A-01D-A34X-08	C	C	.	.	.	.	.	.	.	.	.	.	.	.	.	.	.	c.856-23251C>T	.	.	ENST00000344644	.	177	147	30	254	254	0	UGT1A10,intron_variant,,ENST00000373445,;UGT1A4,intron_variant,,ENST00000373409,;UGT1A6,intron_variant,,ENST00000305139,;UGT1A3,intron_variant,,ENST00000482026,;UGT1A6,intron_variant,,ENST00000373424,;UGT1A8,intron_variant,,ENST00000608381,;UGT1A7,intron_variant,,ENST00000373426,;UGT1A8,intron_variant,,ENST00000609637,;UGT1A8,intron_variant,,ENST00000609767,;UGT1A5,intron_variant,,ENST00000373414…	T	ENSG00000242515
UGT1A10	0	.	GRCh37	2	234676527	234676527	+	Silent	SNP	G	G	A	.	.	SKCM-Metastatic		TCGA-FS-A1Z0-06A-11D-A197-08	TCGA-FS-A1Z0-10A-01D-A199-08	G	G	.	.	.	.	.	.	.	.	.	.	.	.	.	.	.	c.1020G>A	p.%3D	p.S340S	ENST00000344644	3/5	112	68	44	158	158	0	UGT1A10,synonymous_variant,p.%3D,ENST00000373445,;UGT1A4,synonymous_variant,p.%3D,ENST00000373409,;UGT1A6,synonymous_variant,p.%3D,ENST00000305139,;UGT1A3,synonymous_variant,p.%3D,ENST00000482026,;UGT1A6,synonymous_variant,p.%3D,ENST00000373424,;UGT1A8,synonymous_variant,p.%3D,ENST00000608383,;UGT1A8,synonymous_variant,p.%3D,ENST00000608381,;UGT1A7,synonymous_variant,p.%3D,ENST00000373426,;UGT1A8…	A	ENSG00000242515
UGT1A10	0	.	GRCh37	2	234678176	234678176	+	Intron	SNP	G	G	T	rs764863268	.	SKCM-Metastatic		TCGA-FS-A1ZQ-06A-11D-A197-08	TCGA-FS-A1ZQ-10A-01D-A199-08	G	G	.	.	.	.	.	.	.	.	.	.	.	.	.	.	.	c.1295+1091G>T	.	.	ENST00000344644	.	25	22	3	43	43	0	UGT1A10,splice_acceptor_variant,,ENST00000373445,;UGT1A8,splice_acceptor_variant,,ENST00000360418,;UGT1A6,splice_acceptor_variant,,ENST00000406651,;UGT1A4,intron_variant,,ENST00000373409,;UGT1A6,intron_variant,,ENST00000305139,;UGT1A3,intron_variant,,ENST00000482026,;UGT1A6,intron_variant,,ENST00000373424,;UGT1A8,intron_variant,,ENST00000608383,;UGT1A8,intron_variant,,ENST00000608381,;UGT1A7,intr…	T	ENSG00000242515
UGT1A10	0	.	GRCh37	2	234652145	234652145	+	Intron	SNP	G	G	T	novel	.	SKCM-Metastatic		TCGA-FS-A1ZR-06A-21D-A197-08	TCGA-FS-A1ZR-10A-01D-A199-08	G	G	.	.	.	.	.	.	.	.	.	.	.	.	.	.	.	c.856-23535G>T	.	.	ENST00000344644	.	29	25	3	52	52	0	UGT1A10,intron_variant,,ENST00000373445,;UGT1A4,intron_variant,,ENST00000373409,;UGT1A6,intron_variant,,ENST00000305139,;UGT1A3,intron_variant,,ENST00000482026,;UGT1A6,intron_variant,,ENST00000373424,;UGT1A8,intron_variant,,ENST00000608381,;UGT1A7,intron_variant,,ENST00000373426,;UGT1A8,intron_variant,,ENST00000609637,;UGT1A8,intron_variant,,ENST00000609767,;UGT1A5,intron_variant,,ENST00000373414…	T	ENSG00000242515
UGT1A10	0	.	GRCh37	2	234545447	234545447	+	Silent	SNP	C	C	T	rs142395215	.	SKCM-Metastatic		TCGA-FS-A1ZZ-06A-11D-A197-08	TCGA-FS-A1ZZ-10A-01D-A199-08	C	C	.	.	.	.	.	.	.	.	.	.	.	.	.	.	.	c.279C>T	p.%3D	p.F93F	ENST00000344644	1/5	132	67	65	85	84	1	UGT1A10,synonymous_variant,p.%3D,ENST00000373445,;UGT1A10,synonymous_variant,p.%3D,ENST00000344644,;UGT1A8,intron_variant,,ENST00000373450,;	T	ENSG00000242515
UGT1A10	0	.	GRCh37	2	234652078	234652078	+	Intron	SNP	G	G	A	rs779473501	.	SKCM-Metastatic		TCGA-GF-A6C9-06A-11D-A30X-08	TCGA-GF-A6C9-10A-01D-A30X-08	G	G	.	.	.	.	.	.	.	.	.	.	.	.	.	.	.	c.856-23602G>A	.	.	ENST00000344644	.	13	10	3	18	18	0	UGT1A10,intron_variant,,ENST00000373445,;UGT1A4,intron_variant,,ENST00000373409,;UGT1A6,intron_variant,,ENST00000305139,;UGT1A3,intron_variant,,ENST00000482026,;UGT1A6,intron_variant,,ENST00000373424,;UGT1A8,intron_variant,,ENST00000608381,;UGT1A7,intron_variant,,ENST00000373426,;UGT1A8,intron_variant,,ENST00000609637,;UGT1A8,intron_variant,,ENST00000609767,;UGT1A5,intron_variant,,ENST00000373414…	A	ENSG00000242515
UGT1A10	0	.	GRCh37	2	234546024	234546024	+	Splice_Site	SNP	G	G	A	.	.	SKCM-Metastatic		TCGA-GN-A266-06A-11D-A197-08	TCGA-GN-A266-10A-01D-A199-08	G	G	.	.	.	.	.	.	.	.	.	.	.	.	.	.	.	c.855+1G>A	.	p.X285_splice	ENST00000344644	.	104	64	39	239	239	0	UGT1A10,splice_donor_variant,,ENST00000373445,;UGT1A10,splice_donor_variant,,ENST00000344644,;UGT1A8,intron_variant,,ENST00000373450,;	A	ENSG00000242515
UGT1A10	0	.	GRCh37	2	234652314	234652314	+	Intron	SNP	G	G	A	novel	.	SKCM-Metastatic		TCGA-GN-A268-06A-11D-A196-08	TCGA-GN-A268-10A-01D-A198-08	G	G	.	.	.	.	.	.	.	.	.	.	.	.	.	.	.	c.856-23366G>A	.	.	ENST00000344644	.	144	74	69	106	106	0	UGT1A10,intron_variant,,ENST00000373445,;UGT1A4,intron_variant,,ENST00000373409,;UGT1A6,intron_variant,,ENST00000305139,;UGT1A3,intron_variant,,ENST00000482026,;UGT1A6,intron_variant,,ENST00000373424,;UGT1A8,intron_variant,,ENST00000608381,;UGT1A7,intron_variant,,ENST00000373426,;UGT1A8,intron_variant,,ENST00000609637,;UGT1A8,intron_variant,,ENST00000609767,;UGT1A5,intron_variant,,ENST00000373414…	A	ENSG00000242515
UGT1A10	0	.	GRCh37	2	234652078	234652078	+	Intron	SNP	G	G	A	rs779473501	.	SKCM-Metastatic		TCGA-LH-A9QB-06A-11D-A38G-08	TCGA-LH-A9QB-10A-01D-A38J-08	G	G	.	.	.	.	.	.	.	.	.	.	.	.	.	.	.	c.856-23602G>A	.	.	ENST00000344644	.	10	3	7	9	9	0	UGT1A10,intron_variant,,ENST00000373445,;UGT1A4,intron_variant,,ENST00000373409,;UGT1A6,intron_variant,,ENST00000305139,;UGT1A3,intron_variant,,ENST00000482026,;UGT1A6,intron_variant,,ENST00000373424,;UGT1A8,intron_variant,,ENST00000608381,;UGT1A7,intron_variant,,ENST00000373426,;UGT1A8,intron_variant,,ENST00000609637,;UGT1A8,intron_variant,,ENST00000609767,;UGT1A5,intron_variant,,ENST00000373414…	A	ENSG00000242515
UGT1A10	0	.	GRCh37	2	234545374	234545374	+	Missense_Mutation	SNP	C	C	T	rs146289100	.	SKCM-Metastatic		TCGA-OD-A75X-06A-12D-A32N-08	TCGA-OD-A75X-10A-01D-A32N-08	C	C	.	.	.	.	.	.	.	.	.	.	.	.	.	.	.	c.206C>T	p.Ser69Leu	p.S69L	ENST00000344644	1/5	238	95	143	145	145	0	UGT1A10,missense_variant,p.Ser69Leu,ENST00000373445,;UGT1A10,missense_variant,p.Ser69Leu,ENST00000344644,;UGT1A8,intron_variant,,ENST00000373450,;	T	ENSG00000242515
UGT1A10	0	.	GRCh37	2	234652465	234652465	+	Intron	SNP	T	T	C	novel	.	SKCM-Metastatic		TCGA-QB-A6FS-06A-11D-A30X-08	TCGA-QB-A6FS-10A-01D-A30X-08	T	T	.	.	.	.	.	.	.	.	.	.	.	.	.	.	.	c.856-23215T>C	.	.	ENST00000344644	.	206	163	42	203	203	0	UGT1A10,intron_variant,,ENST00000373445,;UGT1A4,intron_variant,,ENST00000373409,;UGT1A6,intron_variant,,ENST00000305139,;UGT1A3,intron_variant,,ENST00000482026,;UGT1A6,intron_variant,,ENST00000373424,;UGT1A8,intron_variant,,ENST00000608381,;UGT1A7,intron_variant,,ENST00000373426,;UGT1A8,intron_variant,,ENST00000609637,;UGT1A8,intron_variant,,ENST00000609767,;UGT1A5,intron_variant,,ENST00000373414…	C	ENSG00000242515
UGT1A10	0	.	GRCh37	2	234545246	234545246	+	Silent	SNP	G	G	A	rs767881078	.	SKCM-Metastatic		TCGA-RP-A693-06A-13D-A30X-08	TCGA-RP-A693-10A-01D-A30X-08	G	G	.	.	.	.	.	.	.	.	.	.	.	.	.	.	.	c.78G>A	p.%3D	p.G26G	ENST00000344644	1/5	111	88	22	125	125	0	UGT1A10,synonymous_variant,p.%3D,ENST00000373445,;UGT1A10,synonymous_variant,p.%3D,ENST00000344644,;UGT1A8,intron_variant,,ENST00000373450,;	A	ENSG00000242515
UGT1A10	0	.	GRCh37	2	234676967	234676967	+	Missense_Mutation	SNP	G	G	A	.	.	SKCM-Metastatic		TCGA-RP-A695-06A-11D-A30X-08	TCGA-RP-A695-10A-01D-A30X-08	G	G	.	.	.	.	.	.	.	.	.	.	.	.	.	.	.	c.1177G>A	p.Asp393Asn	p.D393N	ENST00000344644	4/5	78	23	54	89	88	0	UGT1A10,missense_variant,p.Asp393Asn,ENST00000373445,;UGT1A4,missense_variant,p.Asp397Asn,ENST00000373409,;UGT1A6,missense_variant,p.Asp395Asn,ENST00000305139,;UGT1A3,missense_variant,p.Asp397Asn,ENST00000482026,;UGT1A6,missense_variant,p.Asp128Asn,ENST00000373424,;UGT1A8,missense_variant,p.Asp396Asn,ENST00000608383,;UGT1A8,missense_variant,p.Asp397Asn,ENST00000608381,;UGT1A7,missense_variant,p.A…	A	ENSG00000242515
UGT1A10	0	.	GRCh37	2	234676891	234676891	+	Silent	SNP	C	C	T	novel	.	SKCM-Metastatic		TCGA-W3-A824-06A-21D-A34U-08	TCGA-W3-A824-10A-01D-A34X-08	C	C	.	.	.	.	.	.	.	.	.	.	.	.	.	.	.	c.1101C>T	p.%3D	p.I367I	ENST00000344644	4/5	118	67	51	116	116	0	UGT1A10,synonymous_variant,p.%3D,ENST00000373445,;UGT1A4,synonymous_variant,p.%3D,ENST00000373409,;UGT1A6,synonymous_variant,p.%3D,ENST00000305139,;UGT1A3,synonymous_variant,p.%3D,ENST00000482026,;UGT1A6,synonymous_variant,p.%3D,ENST00000373424,;UGT1A8,synonymous_variant,p.%3D,ENST00000608383,;UGT1A8,synonymous_variant,p.%3D,ENST00000608381,;UGT1A7,synonymous_variant,p.%3D,ENST00000373426,;UGT1A8…	T	ENSG00000242515
UGT1A10	0	.	GRCh37	2	234652529	234652529	+	Intron	SNP	G	G	A	rs373345166	.	SKCM-Metastatic		TCGA-W3-A825-06A-11D-A34U-08	TCGA-W3-A825-10A-01D-A34X-08	G	G	.	.	.	.	.	.	.	.	.	.	.	.	.	.	.	c.856-23151G>A	.	.	ENST00000344644	.	67	52	14	92	92	0	UGT1A10,intron_variant,,ENST00000373445,;UGT1A4,intron_variant,,ENST00000373409,;UGT1A6,intron_variant,,ENST00000305139,;UGT1A3,intron_variant,,ENST00000482026,;UGT1A6,intron_variant,,ENST00000373424,;UGT1A8,intron_variant,,ENST00000608381,;UGT1A7,intron_variant,,ENST00000373426,;UGT1A8,intron_variant,,ENST00000609637,;UGT1A8,intron_variant,,ENST00000609767,;UGT1A5,intron_variant,,ENST00000373414…	A	ENSG00000242515
UGT1A10	0	.	GRCh37	2	234652530	234652530	+	Intron	SNP	G	G	A	novel	.	SKCM-Metastatic		TCGA-W3-A825-06A-11D-A34U-08	TCGA-W3-A825-10A-01D-A34X-08	G	G	.	.	.	.	.	.	.	.	.	.	.	.	.	.	.	c.856-23150G>A	.	.	ENST00000344644	.	69	54	14	95	95	0	UGT1A10,intron_variant,,ENST00000373445,;UGT1A4,intron_variant,,ENST00000373409,;UGT1A6,intron_variant,,ENST00000305139,;UGT1A3,intron_variant,,ENST00000482026,;UGT1A6,intron_variant,,ENST00000373424,;UGT1A8,intron_variant,,ENST00000608381,;UGT1A7,intron_variant,,ENST00000373426,;UGT1A8,intron_variant,,ENST00000609637,;UGT1A8,intron_variant,,ENST00000609767,;UGT1A5,intron_variant,,ENST00000373414…	A	ENSG00000242515
UGT1A10	0	.	GRCh37	2	234545975	234545975	+	Missense_Mutation	SNP	G	G	A	.	.	SKCM-Metastatic		TCGA-W3-AA1V-06B-11D-A401-08	TCGA-W3-AA1V-10A-01D-A401-08	G	G	.	.	.	.	.	.	.	.	.	.	.	.	.	.	.	c.807G>A	p.Met269Ile	p.M269I	ENST00000344644	1/5	243	107	136	250	250	0	UGT1A10,missense_variant,p.Met269Ile,ENST00000373445,;UGT1A10,missense_variant,p.Met269Ile,ENST00000344644,;UGT1A8,intron_variant,,ENST00000373450,;	A	ENSG00000242515
UGT1A10	0	.	GRCh37	2	234652078	234652078	+	Intron	SNP	G	G	A	rs779473501	.	SKCM-Metastatic		TCGA-W3-AA1V-06B-11D-A401-08	TCGA-W3-AA1V-10A-01D-A401-08	G	G	.	.	.	.	.	.	.	.	.	.	.	.	.	.	.	c.856-23602G>A	.	.	ENST00000344644	.	10	6	4	9	9	0	UGT1A10,intron_variant,,ENST00000373445,;UGT1A4,intron_variant,,ENST00000373409,;UGT1A6,intron_variant,,ENST00000305139,;UGT1A3,intron_variant,,ENST00000482026,;UGT1A6,intron_variant,,ENST00000373424,;UGT1A8,intron_variant,,ENST00000608381,;UGT1A7,intron_variant,,ENST00000373426,;UGT1A8,intron_variant,,ENST00000609637,;UGT1A8,intron_variant,,ENST00000609767,;UGT1A5,intron_variant,,ENST00000373414…	A	ENSG00000242515
UGT1A10	0	.	GRCh37	2	234678330	234678330	+	Intron	SNP	G	G	A	novel	.	SKCM-Metastatic		TCGA-WE-A8ZM-06A-11D-A372-08	TCGA-WE-A8ZM-10A-01D-A375-08	G	G	.	.	.	.	.	.	.	.	.	.	.	.	.	.	.	c.1295+1245G>A	.	.	ENST00000344644	.	11	8	3	10	10	0	UGT1A10,3_prime_UTR_variant,,ENST00000373445,;UGT1A8,3_prime_UTR_variant,,ENST00000360418,;UGT1A6,3_prime_UTR_variant,,ENST00000406651,;UGT1A4,intron_variant,,ENST00000373409,;UGT1A6,intron_variant,,ENST00000305139,;UGT1A3,intron_variant,,ENST00000482026,;UGT1A6,intron_variant,,ENST00000373424,;UGT1A8,intron_variant,,ENST00000608383,;UGT1A8,intron_variant,,ENST00000608381,;UGT1A7,intron_variant,,…	A	ENSG00000242515
UGT1A10	0	.	GRCh37	2	234652098	234652098	+	Intron	SNP	G	G	A	novel	.	SKCM-Metastatic		TCGA-WE-AAA0-06A-11D-A38G-08	TCGA-WE-AAA0-10A-01D-A38J-08	G	G	.	.	.	.	.	.	.	.	.	.	.	.	.	.	.	c.856-23582G>A	.	.	ENST00000344644	.	13	8	5	21	21	0	UGT1A10,intron_variant,,ENST00000373445,;UGT1A4,intron_variant,,ENST00000373409,;UGT1A6,intron_variant,,ENST00000305139,;UGT1A3,intron_variant,,ENST00000482026,;UGT1A6,intron_variant,,ENST00000373424,;UGT1A8,intron_variant,,ENST00000608381,;UGT1A7,intron_variant,,ENST00000373426,;UGT1A8,intron_variant,,ENST00000609637,;UGT1A8,intron_variant,,ENST00000609767,;UGT1A5,intron_variant,,ENST00000373414…	A	ENSG00000242515
UGT1A10	0	.	GRCh37	2	234545731	234545731	+	Missense_Mutation	SNP	C	C	T	.	.	SKCM-Metastatic		TCGA-Z2-A8RT-06A-11D-A372-08	TCGA-Z2-A8RT-10A-01D-A375-08	C	C	.	.	.	.	.	.	.	.	.	.	.	.	.	.	.	c.563C>T	p.Ser188Phe	p.S188F	ENST00000344644	1/5	286	179	107	256	256	0	UGT1A10,missense_variant,p.Ser188Phe,ENST00000373445,;UGT1A10,missense_variant,p.Ser188Phe,ENST00000344644,;UGT1A8,intron_variant,,ENST00000373450,;	T	ENSG00000242515
UGT1A10	0	.	GRCh37	2	234652351	234652351	+	Intron	SNP	G	G	A	rs756391897	.	STAD		TCGA-BR-4361-01A-01D-1158-08	TCGA-BR-4361-11A-01D-1158-08	G	G	.	.	.	.	.	.	.	.	.	.	.	.	.	.	.	c.856-23329G>A	.	.	ENST00000344644	.	198	138	60	292	291	1	UGT1A10,intron_variant,,ENST00000373445,;UGT1A4,intron_variant,,ENST00000373409,;UGT1A6,intron_variant,,ENST00000305139,;UGT1A3,intron_variant,,ENST00000482026,;UGT1A6,intron_variant,,ENST00000373424,;UGT1A8,intron_variant,,ENST00000608381,;UGT1A7,intron_variant,,ENST00000373426,;UGT1A8,intron_variant,,ENST00000609637,;UGT1A8,intron_variant,,ENST00000609767,;UGT1A5,intron_variant,,ENST00000373414…	A	ENSG00000242515
UGT1A10	0	.	GRCh37	2	234652578	234652578	+	Intron	SNP	C	C	T	novel	.	STAD		TCGA-BR-4363-01A-01D-1158-08	TCGA-BR-4363-11A-01D-1158-08	C	C	.	.	.	.	.	.	.	.	.	.	.	.	.	.	.	c.856-23102C>T	.	.	ENST00000344644	.	38	25	13	29	29	0	UGT1A10,intron_variant,,ENST00000373445,;UGT1A4,intron_variant,,ENST00000373409,;UGT1A6,intron_variant,,ENST00000305139,;UGT1A3,intron_variant,,ENST00000482026,;UGT1A6,intron_variant,,ENST00000373424,;UGT1A8,intron_variant,,ENST00000608381,;UGT1A7,intron_variant,,ENST00000373426,;UGT1A8,intron_variant,,ENST00000609637,;UGT1A8,intron_variant,,ENST00000609767,;UGT1A5,intron_variant,,ENST00000373414…	T	ENSG00000242515
UGT1A10	0	.	GRCh37	2	234678235	234678235	+	Intron	SNP	A	A	T	novel	.	STAD		TCGA-BR-8589-01A-11D-2394-08	TCGA-BR-8589-10A-01D-2394-08	A	A	.	.	.	.	.	.	.	.	.	.	.	.	.	.	.	c.1295+1150A>T	.	.	ENST00000344644	.	41	35	6	38	38	0	UGT1A10,3_prime_UTR_variant,,ENST00000373445,;UGT1A8,3_prime_UTR_variant,,ENST00000360418,;UGT1A6,3_prime_UTR_variant,,ENST00000406651,;UGT1A4,intron_variant,,ENST00000373409,;UGT1A6,intron_variant,,ENST00000305139,;UGT1A3,intron_variant,,ENST00000482026,;UGT1A6,intron_variant,,ENST00000373424,;UGT1A8,intron_variant,,ENST00000608383,;UGT1A8,intron_variant,,ENST00000608381,;UGT1A7,intron_variant,,…	T	ENSG00000242515
UGT1A10	0	.	GRCh37	2	234652296	234652296	+	Intron	SNP	G	G	A	rs556129739	.	STAD		TCGA-BR-A4PE-01A-31D-A25D-08	TCGA-BR-A4PE-10A-01D-A25E-08	G	G	.	.	.	.	.	.	.	.	.	.	.	.	.	.	.	c.856-23384G>A	.	.	ENST00000344644	.	165	134	30	272	271	0	UGT1A10,intron_variant,,ENST00000373445,;UGT1A4,intron_variant,,ENST00000373409,;UGT1A6,intron_variant,,ENST00000305139,;UGT1A3,intron_variant,,ENST00000482026,;UGT1A6,intron_variant,,ENST00000373424,;UGT1A8,intron_variant,,ENST00000608381,;UGT1A7,intron_variant,,ENST00000373426,;UGT1A8,intron_variant,,ENST00000609637,;UGT1A8,intron_variant,,ENST00000609767,;UGT1A5,intron_variant,,ENST00000373414…	A	ENSG00000242515
UGT1A10	0	.	GRCh37	2	234545590	234545590	+	Missense_Mutation	SNP	C	C	A	rs202031151	.	STAD		TCGA-CD-8524-01A-11D-2340-08	TCGA-CD-8524-10A-01D-2341-08	C	C	.	.	.	.	.	.	.	.	.	.	.	.	.	.	.	c.422C>A	p.Ser141Tyr	p.S141Y	ENST00000344644	1/5	120	75	45	205	205	0	UGT1A10,missense_variant,p.Ser141Tyr,ENST00000373445,;UGT1A10,missense_variant,p.Ser141Tyr,ENST00000344644,;UGT1A8,intron_variant,,ENST00000373450,;	A	ENSG00000242515
UGT1A10	0	.	GRCh37	2	234676494	234676494	+	Splice_Site	SNP	G	G	A	.	.	STAD		TCGA-CG-4440-01A-01D-1158-08	TCGA-CG-4440-10A-01D-1158-08	G	G	.	.	.	.	.	.	.	.	.	.	.	.	.	.	.	c.988-1G>A	.	p.X330_splice	ENST00000344644	.	190	159	31	152	152	0	UGT1A10,splice_acceptor_variant,,ENST00000373445,;UGT1A4,splice_acceptor_variant,,ENST00000373409,;UGT1A6,splice_acceptor_variant,,ENST00000305139,;UGT1A3,splice_acceptor_variant,,ENST00000482026,;UGT1A6,splice_acceptor_variant,,ENST00000373424,;UGT1A8,splice_acceptor_variant,,ENST00000608383,;UGT1A8,splice_acceptor_variant,,ENST00000608381,;UGT1A7,splice_acceptor_variant,,ENST00000373426,;UGT1A8…	A	ENSG00000242515
UGT1A10	0	.	GRCh37	2	234652528	234652528	+	Intron	SNP	C	C	A	rs779162939	.	STAD		TCGA-CG-5726-01A-11D-1600-08	TCGA-CG-5726-11A-01D-1600-08	C	C	.	.	.	.	.	.	.	.	.	.	.	.	.	.	.	c.856-23152C>A	.	.	ENST00000344644	.	100	56	44	114	114	0	UGT1A10,intron_variant,,ENST00000373445,;UGT1A4,intron_variant,,ENST00000373409,;UGT1A6,intron_variant,,ENST00000305139,;UGT1A3,intron_variant,,ENST00000482026,;UGT1A6,intron_variant,,ENST00000373424,;UGT1A8,intron_variant,,ENST00000608381,;UGT1A7,intron_variant,,ENST00000373426,;UGT1A8,intron_variant,,ENST00000609637,;UGT1A8,intron_variant,,ENST00000609767,;UGT1A5,intron_variant,,ENST00000373414…	A	ENSG00000242515
UGT1A10	0	.	GRCh37	2	234652384	234652384	+	Intron	SNP	T	T	A	novel	.	STAD		TCGA-D7-6822-01A-11D-1882-08	TCGA-D7-6822-10A-01D-1882-08	T	T	.	.	.	.	.	.	.	.	.	.	.	.	.	.	.	c.856-23296T>A	.	.	ENST00000344644	.	305	186	119	336	336	0	UGT1A10,intron_variant,,ENST00000373445,;UGT1A4,intron_variant,,ENST00000373409,;UGT1A6,intron_variant,,ENST00000305139,;UGT1A3,intron_variant,,ENST00000482026,;UGT1A6,intron_variant,,ENST00000373424,;UGT1A8,intron_variant,,ENST00000608381,;UGT1A7,intron_variant,,ENST00000373426,;UGT1A8,intron_variant,,ENST00000609637,;UGT1A8,intron_variant,,ENST00000609767,;UGT1A5,intron_variant,,ENST00000373414…	A	ENSG00000242515
UGT1A10	0	.	GRCh37	2	234545526	234545526	+	Frame_Shift_Del	DEL	T	T	-	novel	.	STAD		TCGA-HJ-7597-01A-21D-2201-08	TCGA-HJ-7597-10A-01D-2201-08	T	T	.	.	.	.	.	.	.	.	.	.	.	.	.	.	.	c.364delT	p.Ser122ArgfsTer12	p.S122Rfs*12	ENST00000344644	1/5	52	44	8	118	118	0	UGT1A10,frameshift_variant,p.Ser122ArgfsTer12,ENST00000373445,;UGT1A10,frameshift_variant,p.Ser122ArgfsTer12,ENST00000344644,;UGT1A8,intron_variant,,ENST00000373450,;	-	ENSG00000242515
UGT1A10	0	.	GRCh37	2	234652344	234652344	+	Intron	SNP	C	C	T	rs368889261	.	STAD		TCGA-HU-A4GQ-01A-11D-A25D-08	TCGA-HU-A4GQ-10A-01D-A25E-08	C	C	.	.	.	.	.	.	.	.	.	.	.	.	.	.	.	c.856-23336C>T	.	.	ENST00000344644	.	187	137	50	240	240	0	UGT1A10,intron_variant,,ENST00000373445,;UGT1A4,intron_variant,,ENST00000373409,;UGT1A6,intron_variant,,ENST00000305139,;UGT1A3,intron_variant,,ENST00000482026,;UGT1A6,intron_variant,,ENST00000373424,;UGT1A8,intron_variant,,ENST00000608381,;UGT1A7,intron_variant,,ENST00000373426,;UGT1A8,intron_variant,,ENST00000609637,;UGT1A8,intron_variant,,ENST00000609767,;UGT1A5,intron_variant,,ENST00000373414…	T	ENSG00000242515
UGT1A10	0	.	GRCh37	2	234676526	234676526	+	Missense_Mutation	SNP	C	C	T	rs144978321	.	STAD		TCGA-HU-A4GQ-01A-11D-A25D-08	TCGA-HU-A4GQ-10A-01D-A25E-08	C	C	.	.	.	.	.	.	.	.	.	.	.	.	.	.	.	c.1019C>T	p.Ser340Leu	p.S340L	ENST00000344644	3/5	137	111	26	137	137	0	UGT1A10,missense_variant,p.Ser340Leu,ENST00000373445,;UGT1A4,missense_variant,p.Ser344Leu,ENST00000373409,;UGT1A6,missense_variant,p.Ser342Leu,ENST00000305139,;UGT1A3,missense_variant,p.Ser344Leu,ENST00000482026,;UGT1A6,missense_variant,p.Ser75Leu,ENST00000373424,;UGT1A8,missense_variant,p.Ser343Leu,ENST00000608383,;UGT1A8,missense_variant,p.Ser344Leu,ENST00000608381,;UGT1A7,missense_variant,p.Se…	T	ENSG00000242515
UGT1A10	0	.	GRCh37	2	234676936	234676936	+	Silent	SNP	C	C	T	rs765390164	.	STAD		TCGA-HU-A4GU-01A-11D-A25D-08	TCGA-HU-A4GU-10A-01D-A25E-08	C	C	.	.	.	.	.	.	.	.	.	.	.	.	.	.	.	c.1146C>T	p.%3D	p.G382G	ENST00000344644	4/5	146	104	41	181	181	0	UGT1A10,synonymous_variant,p.%3D,ENST00000373445,;UGT1A4,synonymous_variant,p.%3D,ENST00000373409,;UGT1A6,synonymous_variant,p.%3D,ENST00000305139,;UGT1A3,synonymous_variant,p.%3D,ENST00000482026,;UGT1A6,synonymous_variant,p.%3D,ENST00000373424,;UGT1A8,synonymous_variant,p.%3D,ENST00000608383,;UGT1A8,synonymous_variant,p.%3D,ENST00000608381,;UGT1A7,synonymous_variant,p.%3D,ENST00000373426,;UGT1A8…	T	ENSG00000242515
UGT1A10	0	.	GRCh37	2	234652144	234652144	+	Intron	SNP	G	G	T	novel	.	STAD		TCGA-HU-A4H3-01A-21D-A25D-08	TCGA-HU-A4H3-10A-01D-A25E-08	G	G	.	.	.	.	.	.	.	.	.	.	.	.	.	.	.	c.856-23536G>T	.	.	ENST00000344644	.	45	28	17	55	55	0	UGT1A10,intron_variant,,ENST00000373445,;UGT1A4,intron_variant,,ENST00000373409,;UGT1A6,intron_variant,,ENST00000305139,;UGT1A3,intron_variant,,ENST00000482026,;UGT1A6,intron_variant,,ENST00000373424,;UGT1A8,intron_variant,,ENST00000608381,;UGT1A7,intron_variant,,ENST00000373426,;UGT1A8,intron_variant,,ENST00000609637,;UGT1A8,intron_variant,,ENST00000609767,;UGT1A5,intron_variant,,ENST00000373414…	T	ENSG00000242515
UGT1A10	0	.	GRCh37	2	234676577	234676577	+	Missense_Mutation	SNP	T	T	C	novel	.	STAD		TCGA-RD-A8N6-01A-11D-A364-08	TCGA-RD-A8N6-10A-01D-A362-08	T	T	.	.	.	.	.	.	.	.	.	.	.	.	.	.	.	c.1070T>C	p.Leu357Pro	p.L357P	ENST00000344644	3/5	88	80	8	85	85	0	UGT1A10,missense_variant,p.Leu357Pro,ENST00000373445,;UGT1A4,missense_variant,p.Leu361Pro,ENST00000373409,;UGT1A6,missense_variant,p.Leu359Pro,ENST00000305139,;UGT1A3,missense_variant,p.Leu361Pro,ENST00000482026,;UGT1A6,missense_variant,p.Leu92Pro,ENST00000373424,;UGT1A8,missense_variant,p.Leu360Pro,ENST00000608383,;UGT1A8,missense_variant,p.Leu361Pro,ENST00000608381,;UGT1A7,missense_variant,p.Le…	C	ENSG00000242515
UGT1A10	0	.	GRCh37	2	234652493	234652493	+	Intron	SNP	G	G	A	rs771949487	.	STAD		TCGA-RD-A8NB-01A-12D-A397-08	TCGA-RD-A8NB-10A-01D-A39A-08	G	G	.	.	.	.	.	.	.	.	.	.	.	.	.	.	.	c.856-23187G>A	.	.	ENST00000344644	.	73	62	10	271	271	0	UGT1A10,intron_variant,,ENST00000373445,;UGT1A4,intron_variant,,ENST00000373409,;UGT1A6,intron_variant,,ENST00000305139,;UGT1A3,intron_variant,,ENST00000482026,;UGT1A6,intron_variant,,ENST00000373424,;UGT1A8,intron_variant,,ENST00000608381,;UGT1A7,intron_variant,,ENST00000373426,;UGT1A8,intron_variant,,ENST00000609637,;UGT1A8,intron_variant,,ENST00000609767,;UGT1A5,intron_variant,,ENST00000373414…	A	ENSG00000242515
UGT1A10	0	.	GRCh37	2	234676504	234676504	+	Missense_Mutation	SNP	C	C	T	rs139607673	.	STAD		TCGA-RD-A8NB-01A-12D-A397-08	TCGA-RD-A8NB-10A-01D-A39A-08	C	C	.	.	.	.	.	.	.	.	.	.	.	.	.	.	.	c.997C>T	p.Arg333Trp	p.R333W	ENST00000344644	3/5	74	63	10	207	206	0	UGT1A10,missense_variant,p.Arg333Trp,ENST00000373445,;UGT1A4,missense_variant,p.Arg337Trp,ENST00000373409,;UGT1A6,missense_variant,p.Arg335Trp,ENST00000305139,;UGT1A3,missense_variant,p.Arg337Trp,ENST00000482026,;UGT1A6,missense_variant,p.Arg68Trp,ENST00000373424,;UGT1A8,missense_variant,p.Arg336Trp,ENST00000608383,;UGT1A8,missense_variant,p.Arg337Trp,ENST00000608381,;UGT1A7,missense_variant,p.Ar…	T	ENSG00000242515
UGT1A10	0	.	GRCh37	2	234652529	234652529	+	Intron	SNP	G	G	A	rs373345166	.	STAD		TCGA-VQ-A91D-01A-11D-A410-08	TCGA-VQ-A91D-10A-01D-A413-08	G	G	.	.	.	.	.	.	.	.	.	.	.	.	.	.	.	c.856-23151G>A	.	.	ENST00000344644	.	61	39	22	70	70	0	UGT1A10,intron_variant,,ENST00000373445,;UGT1A4,intron_variant,,ENST00000373409,;UGT1A6,intron_variant,,ENST00000305139,;UGT1A3,intron_variant,,ENST00000482026,;UGT1A6,intron_variant,,ENST00000373424,;UGT1A8,intron_variant,,ENST00000608381,;UGT1A7,intron_variant,,ENST00000373426,;UGT1A8,intron_variant,,ENST00000609637,;UGT1A8,intron_variant,,ENST00000609767,;UGT1A5,intron_variant,,ENST00000373414…	A	ENSG00000242515
UGT1A10	0	.	GRCh37	2	234652412	234652412	+	Intron	SNP	C	C	T	rs750440547	.	STAD		TCGA-VQ-A91K-01A-11D-A410-08	TCGA-VQ-A91K-10A-01D-A413-08	C	C	.	.	.	.	.	.	.	.	.	.	.	.	.	.	.	c.856-23268C>T	.	.	ENST00000344644	.	186	102	83	231	231	0	UGT1A10,intron_variant,,ENST00000373445,;UGT1A4,intron_variant,,ENST00000373409,;UGT1A6,intron_variant,,ENST00000305139,;UGT1A3,intron_variant,,ENST00000482026,;UGT1A6,intron_variant,,ENST00000373424,;UGT1A8,intron_variant,,ENST00000608381,;UGT1A7,intron_variant,,ENST00000373426,;UGT1A8,intron_variant,,ENST00000609637,;UGT1A8,intron_variant,,ENST00000609767,;UGT1A5,intron_variant,,ENST00000373414…	T	ENSG00000242515
UGT1A10	0	.	GRCh37	2	234652110	234652110	+	Intron	SNP	C	C	T	rs542057655	.	THYM		TCGA-ZB-A966-01A-11D-A428-09	TCGA-ZB-A966-10A-01D-A42B-09	C	C	.	.	.	.	.	.	.	.	.	.	.	.	.	.	.	c.856-23570C>T	.	.	ENST00000344644	.	32	21	11	39	39	0	UGT1A10,intron_variant,,ENST00000373445,;UGT1A4,intron_variant,,ENST00000373409,;UGT1A6,intron_variant,,ENST00000305139,;UGT1A3,intron_variant,,ENST00000482026,;UGT1A6,intron_variant,,ENST00000373424,;UGT1A8,intron_variant,,ENST00000608381,;UGT1A7,intron_variant,,ENST00000373426,;UGT1A8,intron_variant,,ENST00000609637,;UGT1A8,intron_variant,,ENST00000609767,;UGT1A5,intron_variant,,ENST00000373414…	T	ENSG00000242515
UGT1A10	0	.	GRCh37	2	234676504	234676504	+	Missense_Mutation	SNP	C	C	T	rs139607673	.	UCEC		TCGA-A5-A0GB-01A-11W-A062-09	TCGA-A5-A0GB-10A-01W-A062-09	C	C	.	.	.	.	.	.	.	.	.	.	.	.	.	.	.	c.997C>T	p.Arg333Trp	p.R333W	ENST00000344644	3/5	302	181	120	218	218	0	UGT1A10,missense_variant,p.Arg333Trp,ENST00000373445,;UGT1A4,missense_variant,p.Arg337Trp,ENST00000373409,;UGT1A6,missense_variant,p.Arg335Trp,ENST00000305139,;UGT1A3,missense_variant,p.Arg337Trp,ENST00000482026,;UGT1A6,missense_variant,p.Arg68Trp,ENST00000373424,;UGT1A8,missense_variant,p.Arg336Trp,ENST00000608383,;UGT1A8,missense_variant,p.Arg337Trp,ENST00000608381,;UGT1A7,missense_variant,p.Ar…	T	ENSG00000242515
UGT1A10	0	.	GRCh37	2	234676536	234676536	+	Silent	SNP	G	G	A	rs770433443	.	UCEC		TCGA-A5-A0GH-01A-21W-A062-09	TCGA-A5-A0GH-10A-01W-A062-09	G	G	.	.	.	.	.	.	.	.	.	.	.	.	.	.	.	c.1029G>A	p.%3D	p.A343A	ENST00000344644	3/5	233	129	103	283	283	0	UGT1A10,synonymous_variant,p.%3D,ENST00000373445,;UGT1A4,synonymous_variant,p.%3D,ENST00000373409,;UGT1A6,synonymous_variant,p.%3D,ENST00000305139,;UGT1A3,synonymous_variant,p.%3D,ENST00000482026,;UGT1A6,synonymous_variant,p.%3D,ENST00000373424,;UGT1A8,synonymous_variant,p.%3D,ENST00000608383,;UGT1A8,synonymous_variant,p.%3D,ENST00000608381,;UGT1A7,synonymous_variant,p.%3D,ENST00000373426,;UGT1A8…	A	ENSG00000242515
UGT1A10	0	.	GRCh37	2	234545560	234545560	+	Missense_Mutation	SNP	G	G	A	rs777228086	.	UCEC		TCGA-AJ-A3BG-01A-11D-A19Y-09	TCGA-AJ-A3BG-10A-01D-A19Y-09	G	G	.	.	.	.	.	.	.	.	.	.	.	.	.	.	.	c.392G>A	p.Arg131Gln	p.R131Q	ENST00000344644	1/5	56	29	27	66	66	0	UGT1A10,missense_variant,p.Arg131Gln,ENST00000373445,;UGT1A10,missense_variant,p.Arg131Gln,ENST00000344644,;UGT1A8,intron_variant,,ENST00000373450,;	A	ENSG00000242515
UGT1A10	0	.	GRCh37	2	234652389	234652389	+	Intron	SNP	G	G	A	rs745945267	.	UCEC		TCGA-AJ-A3BH-01A-11D-A19Y-09	TCGA-AJ-A3BH-10A-01D-A19Y-09	G	G	.	.	.	.	.	.	.	.	.	.	.	.	.	.	.	c.856-23291G>A	.	.	ENST00000344644	.	100	71	29	117	117	0	UGT1A10,intron_variant,,ENST00000373445,;UGT1A4,intron_variant,,ENST00000373409,;UGT1A6,intron_variant,,ENST00000305139,;UGT1A3,intron_variant,,ENST00000482026,;UGT1A6,intron_variant,,ENST00000373424,;UGT1A8,intron_variant,,ENST00000608381,;UGT1A7,intron_variant,,ENST00000373426,;UGT1A8,intron_variant,,ENST00000609637,;UGT1A8,intron_variant,,ENST00000609767,;UGT1A5,intron_variant,,ENST00000373414…	A	ENSG00000242515
UGT1A10	0	.	GRCh37	2	234652338	234652338	+	Intron	SNP	G	G	A	rs184388078	.	UCEC		TCGA-AJ-A3OJ-01A-11D-A228-09	TCGA-AJ-A3OJ-10A-01D-A22A-09	G	G	.	.	.	.	.	.	.	.	.	.	.	.	.	.	.	c.856-23342G>A	.	.	ENST00000344644	.	84	56	28	72	72	0	UGT1A10,intron_variant,,ENST00000373445,;UGT1A4,intron_variant,,ENST00000373409,;UGT1A6,intron_variant,,ENST00000305139,;UGT1A3,intron_variant,,ENST00000482026,;UGT1A6,intron_variant,,ENST00000373424,;UGT1A8,intron_variant,,ENST00000608381,;UGT1A7,intron_variant,,ENST00000373426,;UGT1A8,intron_variant,,ENST00000609637,;UGT1A8,intron_variant,,ENST00000609767,;UGT1A5,intron_variant,,ENST00000373414…	A	ENSG00000242515
UGT1A10	0	.	GRCh37	2	234545622	234545622	+	Missense_Mutation	SNP	A	A	G	novel	.	UCEC		TCGA-AJ-A3OK-01A-12D-A228-09	TCGA-AJ-A3OK-10A-01D-A22A-09	A	A	.	.	.	.	.	.	.	.	.	.	.	.	.	.	.	c.454A>G	p.Thr152Ala	p.T152A	ENST00000344644	1/5	65	41	24	52	52	0	UGT1A10,missense_variant,p.Thr152Ala,ENST00000373445,;UGT1A10,missense_variant,p.Thr152Ala,ENST00000344644,;UGT1A8,intron_variant,,ENST00000373450,;	G	ENSG00000242515
UGT1A10	0	.	GRCh37	2	234545642	234545642	+	Silent	SNP	T	T	C	rs28969684	.	UCEC		TCGA-AJ-A3OK-01A-12D-A228-09	TCGA-AJ-A3OK-10A-01D-A22A-09	T	T	.	.	.	.	.	.	.	.	.	.	.	.	.	.	.	c.474T>C	p.%3D	p.A158A	ENST00000344644	1/5	67	40	27	57	57	0	UGT1A10,synonymous_variant,p.%3D,ENST00000373445,;UGT1A10,synonymous_variant,p.%3D,ENST00000344644,;UGT1A8,intron_variant,,ENST00000373450,;	C	ENSG00000242515
UGT1A10	0	.	GRCh37	2	234651781	234651781	+	Intron	DEL	A	A	-	novel	.	UCEC		TCGA-AP-A1DO-01A-11D-A135-09	TCGA-AP-A1DO-10A-01D-A135-09	A	A	.	.	.	.	.	.	.	.	.	.	.	.	.	.	.	c.856-23893delA	.	.	ENST00000344644	.	56	41	15	52	52	0	UGT1A10,intron_variant,,ENST00000373445,;UGT1A4,intron_variant,,ENST00000373409,;UGT1A6,intron_variant,,ENST00000305139,;UGT1A3,intron_variant,,ENST00000482026,;UGT1A6,intron_variant,,ENST00000373424,;UGT1A8,intron_variant,,ENST00000608381,;UGT1A7,intron_variant,,ENST00000373426,;UGT1A8,intron_variant,,ENST00000609637,;UGT1A8,intron_variant,,ENST00000609767,;UGT1A5,intron_variant,,ENST00000373414…	-	ENSG00000242515
UGT1A10	0	.	GRCh37	2	234545238	234545238	+	Missense_Mutation	SNP	G	G	A	rs764890876	.	UCEC		TCGA-AX-A2IO-01A-11D-A17W-09	TCGA-AX-A2IO-10A-01D-A17W-09	G	G	.	.	.	.	.	.	.	.	.	.	.	.	.	.	.	c.70G>A	p.Glu24Lys	p.E24K	ENST00000344644	1/5	165	118	47	144	144	0	UGT1A10,missense_variant,p.Glu24Lys,ENST00000373445,;UGT1A10,missense_variant,p.Glu24Lys,ENST00000344644,;UGT1A8,intron_variant,,ENST00000373450,;	A	ENSG00000242515
UGT1A10	0	.	GRCh37	2	234652060	234652060	+	Intron	SNP	C	C	T	novel	.	UCEC		TCGA-BG-A0VW-01A-11D-A122-09	TCGA-BG-A0VW-10A-01D-A122-09	C	C	.	.	.	.	.	.	.	.	.	.	.	.	.	.	.	c.856-23620C>T	.	.	ENST00000344644	.	10	6	4	9	9	0	UGT1A10,intron_variant,,ENST00000373445,;UGT1A4,intron_variant,,ENST00000373409,;UGT1A6,intron_variant,,ENST00000305139,;UGT1A3,intron_variant,,ENST00000482026,;UGT1A6,intron_variant,,ENST00000373424,;UGT1A8,intron_variant,,ENST00000608381,;UGT1A7,intron_variant,,ENST00000373426,;UGT1A8,intron_variant,,ENST00000609637,;UGT1A8,intron_variant,,ENST00000609767,;UGT1A5,intron_variant,,ENST00000373414…	T	ENSG00000242515
UGT1A10	0	.	GRCh37	2	234652198	234652198	+	Intron	SNP	A	A	C	rs747649098	.	UCEC		TCGA-BG-A0VX-01A-11D-A122-09	TCGA-BG-A0VX-10A-01D-A122-09	A	A	.	.	.	.	.	.	.	.	.	.	.	.	.	.	.	c.856-23482A>C	.	.	ENST00000344644	.	39	29	10	41	41	0	UGT1A10,intron_variant,,ENST00000373445,;UGT1A4,intron_variant,,ENST00000373409,;UGT1A6,intron_variant,,ENST00000305139,;UGT1A3,intron_variant,,ENST00000482026,;UGT1A6,intron_variant,,ENST00000373424,;UGT1A8,intron_variant,,ENST00000608381,;UGT1A7,intron_variant,,ENST00000373426,;UGT1A8,intron_variant,,ENST00000609637,;UGT1A8,intron_variant,,ENST00000609767,;UGT1A5,intron_variant,,ENST00000373414…	C	ENSG00000242515
UGT1A10	0	.	GRCh37	2	234545375	234545375	+	Silent	SNP	A	A	G	novel	.	UCEC		TCGA-BG-A221-01A-21D-A159-09	TCGA-BG-A221-10A-01D-A159-09	A	A	.	.	.	.	.	.	.	.	.	.	.	.	.	.	.	c.207A>G	p.%3D	p.S69S	ENST00000344644	1/5	65	51	13	84	84	0	UGT1A10,synonymous_variant,p.%3D,ENST00000373445,;UGT1A10,synonymous_variant,p.%3D,ENST00000344644,;UGT1A8,intron_variant,,ENST00000373450,;	G	ENSG00000242515
UGT1A10	0	.	GRCh37	2	234545246	234545246	+	Silent	SNP	G	G	A	rs767881078	.	UCEC		TCGA-BK-A0CB-01A-32D-A10B-09	TCGA-BK-A0CB-11A-33D-A10B-09	G	G	.	.	.	.	.	.	.	.	.	.	.	.	.	.	.	c.78G>A	p.%3D	p.G26G	ENST00000344644	1/5	120	78	41	31	31	0	UGT1A10,synonymous_variant,p.%3D,ENST00000373445,;UGT1A10,synonymous_variant,p.%3D,ENST00000344644,;UGT1A8,intron_variant,,ENST00000373450,;	A	ENSG00000242515
UGT1A10	0	.	GRCh37	2	234651781	234651781	+	Intron	DEL	A	A	-	novel	.	UCEC		TCGA-BK-A13B-01A-51D-A228-09	TCGA-BK-A13B-10A-01D-A22A-09	A	A	.	.	.	.	.	.	.	.	.	.	.	.	.	.	.	c.856-23893delA	.	.	ENST00000344644	.	52	35	17	39	39	0	UGT1A10,intron_variant,,ENST00000373445,;UGT1A4,intron_variant,,ENST00000373409,;UGT1A6,intron_variant,,ENST00000305139,;UGT1A3,intron_variant,,ENST00000482026,;UGT1A6,intron_variant,,ENST00000373424,;UGT1A8,intron_variant,,ENST00000608381,;UGT1A7,intron_variant,,ENST00000373426,;UGT1A8,intron_variant,,ENST00000609637,;UGT1A8,intron_variant,,ENST00000609767,;UGT1A5,intron_variant,,ENST00000373414…	-	ENSG00000242515
UGT1A10	0	.	GRCh37	2	234545590	234545590	+	Missense_Mutation	SNP	C	C	A	rs202031151	.	UCEC		TCGA-BS-A0TC-01A-11D-A10B-09	TCGA-BS-A0TC-10A-01D-A10B-09	C	C	.	.	.	.	.	.	.	.	.	.	.	.	.	.	.	c.422C>A	p.Ser141Tyr	p.S141Y	ENST00000344644	1/5	395	247	147	182	182	0	UGT1A10,missense_variant,p.Ser141Tyr,ENST00000373445,;UGT1A10,missense_variant,p.Ser141Tyr,ENST00000344644,;UGT1A8,intron_variant,,ENST00000373450,;	A	ENSG00000242515
UGT1A10	0	.	GRCh37	2	234652296	234652296	+	Intron	SNP	G	G	A	rs556129739	.	UCEC		TCGA-D1-A167-01A-11D-A12J-09	TCGA-D1-A167-10A-01D-A12J-09	G	G	.	.	.	.	.	.	.	.	.	.	.	.	.	.	.	c.856-23384G>A	.	.	ENST00000344644	.	32	24	8	31	31	0	UGT1A10,intron_variant,,ENST00000373445,;UGT1A4,intron_variant,,ENST00000373409,;UGT1A6,intron_variant,,ENST00000305139,;UGT1A3,intron_variant,,ENST00000482026,;UGT1A6,intron_variant,,ENST00000373424,;UGT1A8,intron_variant,,ENST00000608381,;UGT1A7,intron_variant,,ENST00000373426,;UGT1A8,intron_variant,,ENST00000609637,;UGT1A8,intron_variant,,ENST00000609767,;UGT1A5,intron_variant,,ENST00000373414…	A	ENSG00000242515
UGT1A10	0	.	GRCh37	2	234545842	234545842	+	Missense_Mutation	SNP	G	G	T	novel	.	UCEC		TCGA-D1-A16X-01A-11D-A12J-09	TCGA-D1-A16X-10A-01D-A12J-09	G	G	.	.	.	.	.	.	.	.	.	.	.	.	.	.	.	c.674G>T	p.Arg225Ile	p.R225I	ENST00000344644	1/5	270	220	50	266	266	0	UGT1A10,missense_variant,p.Arg225Ile,ENST00000373445,;UGT1A10,missense_variant,p.Arg225Ile,ENST00000344644,;UGT1A8,intron_variant,,ENST00000373450,;	T	ENSG00000242515
UGT1A10	0	.	GRCh37	2	234652415	234652415	+	Intron	SNP	C	C	T	novel	.	UCEC		TCGA-D1-A1NS-01A-11D-A14G-09	TCGA-D1-A1NS-10A-01D-A14G-09	C	C	.	.	.	.	.	.	.	.	.	.	.	.	.	.	.	c.856-23265C>T	.	.	ENST00000344644	.	140	100	40	151	151	0	UGT1A10,intron_variant,,ENST00000373445,;UGT1A4,intron_variant,,ENST00000373409,;UGT1A6,intron_variant,,ENST00000305139,;UGT1A3,intron_variant,,ENST00000482026,;UGT1A6,intron_variant,,ENST00000373424,;UGT1A8,intron_variant,,ENST00000608381,;UGT1A7,intron_variant,,ENST00000373426,;UGT1A8,intron_variant,,ENST00000609637,;UGT1A8,intron_variant,,ENST00000609767,;UGT1A5,intron_variant,,ENST00000373414…	T	ENSG00000242515
UGT1A10	0	.	GRCh37	2	234651927	234651927	+	Intron	SNP	T	T	C	novel	.	UCEC		TCGA-DF-A2KN-01A-11D-A17W-09	TCGA-DF-A2KN-10A-01D-A17W-09	T	T	.	.	.	.	.	.	.	.	.	.	.	.	.	.	.	c.856-23753T>C	.	.	ENST00000344644	.	49	38	11	69	69	0	UGT1A10,intron_variant,,ENST00000373445,;UGT1A4,intron_variant,,ENST00000373409,;UGT1A6,intron_variant,,ENST00000305139,;UGT1A3,intron_variant,,ENST00000482026,;UGT1A6,intron_variant,,ENST00000373424,;UGT1A8,intron_variant,,ENST00000608381,;UGT1A7,intron_variant,,ENST00000373426,;UGT1A8,intron_variant,,ENST00000609637,;UGT1A8,intron_variant,,ENST00000609767,;UGT1A5,intron_variant,,ENST00000373414…	C	ENSG00000242515
UGT1A10	0	.	GRCh37	2	234678209	234678209	+	Intron	SNP	G	G	T	novel	.	UCEC		TCGA-DF-A2KN-01A-11D-A17W-09	TCGA-DF-A2KN-10A-01D-A17W-09	G	G	.	.	.	.	.	.	.	.	.	.	.	.	.	.	.	c.1295+1124G>T	.	.	ENST00000344644	.	69	44	25	58	58	0	UGT1A10,3_prime_UTR_variant,,ENST00000373445,;UGT1A8,3_prime_UTR_variant,,ENST00000360418,;UGT1A6,3_prime_UTR_variant,,ENST00000406651,;UGT1A4,intron_variant,,ENST00000373409,;UGT1A6,intron_variant,,ENST00000305139,;UGT1A3,intron_variant,,ENST00000482026,;UGT1A6,intron_variant,,ENST00000373424,;UGT1A8,intron_variant,,ENST00000608383,;UGT1A8,intron_variant,,ENST00000608381,;UGT1A7,intron_variant,,…	T	ENSG00000242515
UGT1A10	0	.	GRCh37	2	234652564	234652564	+	Intron	SNP	C	C	T	novel	.	UCEC		TCGA-DF-A2KZ-01A-11D-A20S-09	TCGA-DF-A2KZ-10A-01D-A20S-09	C	C	.	.	.	.	.	.	.	.	.	.	.	.	.	.	.	c.856-23116C>T	.	.	ENST00000344644	.	45	32	13	41	41	0	UGT1A10,intron_variant,,ENST00000373445,;UGT1A4,intron_variant,,ENST00000373409,;UGT1A6,intron_variant,,ENST00000305139,;UGT1A3,intron_variant,,ENST00000482026,;UGT1A6,intron_variant,,ENST00000373424,;UGT1A8,intron_variant,,ENST00000608381,;UGT1A7,intron_variant,,ENST00000373426,;UGT1A8,intron_variant,,ENST00000609637,;UGT1A8,intron_variant,,ENST00000609767,;UGT1A5,intron_variant,,ENST00000373414…	T	ENSG00000242515
UGT1A10	0	.	GRCh37	2	234652629	234652629	+	Intron	SNP	G	G	A	novel	.	UCEC		TCGA-E6-A2P8-01A-11D-A19Y-09	TCGA-E6-A2P8-10B-01D-A19Y-09	G	G	.	.	.	.	.	.	.	.	.	.	.	.	.	.	.	c.856-23051G>A	.	.	ENST00000344644	.	30	16	14	22	22	0	UGT1A10,intron_variant,,ENST00000373445,;UGT1A4,intron_variant,,ENST00000373409,;UGT1A6,intron_variant,,ENST00000305139,;UGT1A3,intron_variant,,ENST00000482026,;UGT1A6,intron_variant,,ENST00000373424,;UGT1A8,intron_variant,,ENST00000608381,;UGT1A7,intron_variant,,ENST00000373426,;UGT1A8,intron_variant,,ENST00000609637,;UGT1A8,intron_variant,,ENST00000609767,;UGT1A5,intron_variant,,ENST00000373414…	A	ENSG00000242515
UGT1A10	0	.	GRCh37	2	234545351	234545351	+	Missense_Mutation	SNP	G	G	T	novel	.	UCEC		TCGA-E6-A2P9-01A-11D-A19Y-09	TCGA-E6-A2P9-10B-01D-A19Y-09	G	G	.	.	.	.	.	.	.	.	.	.	.	.	.	.	.	c.183G>T	p.Glu61Asp	p.E61D	ENST00000344644	1/5	109	63	46	74	74	0	UGT1A10,missense_variant,p.Glu61Asp,ENST00000373445,;UGT1A10,missense_variant,p.Glu61Asp,ENST00000344644,;UGT1A8,intron_variant,,ENST00000373450,;	T	ENSG00000242515
UGT1A10	0	.	GRCh37	2	234652646	234652646	+	Intron	SNP	G	G	T	novel	.	UCEC		TCGA-E6-A2P9-01A-11D-A19Y-09	TCGA-E6-A2P9-10B-01D-A19Y-09	G	G	.	.	.	.	.	.	.	.	.	.	.	.	.	.	.	c.856-23034G>T	.	.	ENST00000344644	.	18	9	9	18	18	0	UGT1A10,intron_variant,,ENST00000373445,;UGT1A4,intron_variant,,ENST00000373409,;UGT1A6,intron_variant,,ENST00000305139,;UGT1A3,intron_variant,,ENST00000482026,;UGT1A6,intron_variant,,ENST00000373424,;UGT1A8,intron_variant,,ENST00000608381,;UGT1A7,intron_variant,,ENST00000373426,;UGT1A8,intron_variant,,ENST00000609637,;UGT1A8,intron_variant,,ENST00000609767,;UGT1A5,intron_variant,,ENST00000373414…	T	ENSG00000242515
UGT1A10	0	.	GRCh37	2	234652295	234652295	+	Intron	SNP	C	C	T	rs754713764	.	UCEC		TCGA-EC-A24G-01A-11D-A16D-09	TCGA-EC-A24G-10A-01D-A16D-09	C	C	.	.	.	.	.	.	.	.	.	.	.	.	.	.	.	c.856-23385C>T	.	.	ENST00000344644	.	81	61	19	77	77	0	UGT1A10,intron_variant,,ENST00000373445,;UGT1A4,intron_variant,,ENST00000373409,;UGT1A6,intron_variant,,ENST00000305139,;UGT1A3,intron_variant,,ENST00000482026,;UGT1A6,intron_variant,,ENST00000373424,;UGT1A8,intron_variant,,ENST00000608381,;UGT1A7,intron_variant,,ENST00000373426,;UGT1A8,intron_variant,,ENST00000609637,;UGT1A8,intron_variant,,ENST00000609767,;UGT1A5,intron_variant,,ENST00000373414…	T	ENSG00000242515
UGT1A10	0	.	GRCh37	2	234545526	234545526	+	Frame_Shift_Del	DEL	T	T	-	novel	.	UCEC		TCGA-EO-A22S-01A-11D-A18P-09	TCGA-EO-A22S-11A-11D-A18P-09	T	T	.	.	.	.	.	.	.	.	.	.	.	.	.	.	.	c.364delT	p.Ser122ArgfsTer12	p.S122Rfs*12	ENST00000344644	1/5	113	84	29	70	70	0	UGT1A10,frameshift_variant,p.Ser122ArgfsTer12,ENST00000373445,;UGT1A10,frameshift_variant,p.Ser122ArgfsTer12,ENST00000344644,;UGT1A8,intron_variant,,ENST00000373450,;	-	ENSG00000242515
UGT1A10	0	.	GRCh37	2	234652112	234652112	+	Intron	DEL	A	A	-	novel	.	UCEC		TCGA-EO-A22T-01A-21D-A18P-09	TCGA-EO-A22T-11A-11D-A18P-09	A	A	.	.	.	.	.	.	.	.	.	.	.	.	.	.	.	c.856-23565delA	.	.	ENST00000344644	.	39	35	4	46	46	0	UGT1A10,intron_variant,,ENST00000373445,;UGT1A4,intron_variant,,ENST00000373409,;UGT1A6,intron_variant,,ENST00000305139,;UGT1A3,intron_variant,,ENST00000482026,;UGT1A6,intron_variant,,ENST00000373424,;UGT1A8,intron_variant,,ENST00000608381,;UGT1A7,intron_variant,,ENST00000373426,;UGT1A8,intron_variant,,ENST00000609637,;UGT1A8,intron_variant,,ENST00000609767,;UGT1A5,intron_variant,,ENST00000373414…	-	ENSG00000242515
UGT1A10	0	.	GRCh37	2	234545928	234545928	+	Nonsense_Mutation	SNP	C	C	T	rs61748821	.	UCEC		TCGA-EO-A3AU-01A-21D-A19Y-09	TCGA-EO-A3AU-10A-01D-A19Y-09	C	C	.	.	.	.	.	.	.	.	.	.	.	.	.	.	.	c.760C>T	p.Arg254Ter	p.R254*	ENST00000344644	1/5	76	49	26	100	100	0	UGT1A10,stop_gained,p.Arg254Ter,ENST00000373445,;UGT1A10,stop_gained,p.Arg254Ter,ENST00000344644,;UGT1A8,intron_variant,,ENST00000373450,;	T	ENSG00000242515
UGT1A10	0	.	GRCh37	2	234652252	234652252	+	Intron	SNP	A	A	G	novel	.	UCEC		TCGA-EO-A3AU-01A-21D-A19Y-09	TCGA-EO-A3AU-10A-01D-A19Y-09	A	A	.	.	.	.	.	.	.	.	.	.	.	.	.	.	.	c.856-23428A>G	.	.	ENST00000344644	.	44	31	12	43	43	0	UGT1A10,intron_variant,,ENST00000373445,;UGT1A4,intron_variant,,ENST00000373409,;UGT1A6,intron_variant,,ENST00000305139,;UGT1A3,intron_variant,,ENST00000482026,;UGT1A6,intron_variant,,ENST00000373424,;UGT1A8,intron_variant,,ENST00000608381,;UGT1A7,intron_variant,,ENST00000373426,;UGT1A8,intron_variant,,ENST00000609637,;UGT1A8,intron_variant,,ENST00000609767,;UGT1A5,intron_variant,,ENST00000373414…	G	ENSG00000242515
UGT1A10	0	.	GRCh37	2	234545642	234545642	+	Silent	SNP	T	T	G	rs28969684	.	UCEC		TCGA-EO-A3AY-01A-12D-A19Y-09	TCGA-EO-A3AY-10A-01D-A19Y-09	T	T	.	.	.	.	.	.	.	.	.	.	.	.	.	.	.	c.474T>G	p.%3D	p.A158A	ENST00000344644	1/5	134	78	55	75	75	0	UGT1A10,synonymous_variant,p.%3D,ENST00000373445,;UGT1A10,synonymous_variant,p.%3D,ENST00000344644,;UGT1A8,intron_variant,,ENST00000373450,;	G	ENSG00000242515
UGT1A10	0	.	GRCh37	2	234651717	234651717	+	Intron	SNP	G	G	C	novel	.	UCEC		TCGA-EO-A3AZ-01A-12D-A19Y-09	TCGA-EO-A3AZ-10A-01D-A19Y-09	G	G	.	.	.	.	.	.	.	.	.	.	.	.	.	.	.	c.856-23963G>C	.	.	ENST00000344644	.	48	35	13	48	48	0	UGT1A10,intron_variant,,ENST00000373445,;UGT1A4,intron_variant,,ENST00000373409,;UGT1A6,intron_variant,,ENST00000305139,;UGT1A3,intron_variant,,ENST00000482026,;UGT1A6,intron_variant,,ENST00000373424,;UGT1A8,intron_variant,,ENST00000608381,;UGT1A7,intron_variant,,ENST00000373426,;UGT1A8,intron_variant,,ENST00000609637,;UGT1A8,intron_variant,,ENST00000609767,;UGT1A5,intron_variant,,ENST00000373414…	C	ENSG00000242515
UGT1A10	0	.	GRCh37	2	234652302	234652302	+	Intron	SNP	G	G	A	rs528527073	.	UCEC		TCGA-EY-A1G8-01A-11D-A13L-09	TCGA-EY-A1G8-10A-01D-A13O-09	G	G	.	.	.	.	.	.	.	.	.	.	.	.	.	.	.	c.856-23378G>A	.	.	ENST00000344644	.	77	46	31	61	61	0	UGT1A10,intron_variant,,ENST00000373445,;UGT1A4,intron_variant,,ENST00000373409,;UGT1A6,intron_variant,,ENST00000305139,;UGT1A3,intron_variant,,ENST00000482026,;UGT1A6,intron_variant,,ENST00000373424,;UGT1A8,intron_variant,,ENST00000608381,;UGT1A7,intron_variant,,ENST00000373426,;UGT1A8,intron_variant,,ENST00000609637,;UGT1A8,intron_variant,,ENST00000609767,;UGT1A5,intron_variant,,ENST00000373414…	A	ENSG00000242515
UGT1A10	0	.	GRCh37	2	234545590	234545590	+	Missense_Mutation	SNP	C	C	A	rs202031151	.	UCEC		TCGA-EY-A1GI-01A-11D-A13L-09	TCGA-EY-A1GI-10A-01D-A13O-09	C	C	.	.	.	.	.	.	.	.	.	.	.	.	.	.	.	c.422C>A	p.Ser141Tyr	p.S141Y	ENST00000344644	1/5	55	30	25	41	41	0	UGT1A10,missense_variant,p.Ser141Tyr,ENST00000373445,;UGT1A10,missense_variant,p.Ser141Tyr,ENST00000344644,;UGT1A8,intron_variant,,ENST00000373450,;	A	ENSG00000242515
UGT1A10	0	.	GRCh37	2	234651782	234663134	+	Intron	DEL	AAAAAAGTCCGCTATTCCTCCAGATGTGCTTAAAGTCAAATGTGGACTGGAATTACTTGGTGTCAATGCGGAGTAACTGCTCTTTGCTATTTATTATGAAGGACTTTAACTCAACTCTCCATCTTCCTCCACTTCCACCCTTTCTTGGCCATTCTCAATGATTCTCTTGGTGGTGATTTTTTTACCATCAACTATTTCAGTGGAAGTCGACATGGACTTGAAGCTGCCTGTCCCATCACTACCGTAGGACATGCAGAAGGAAGAAAGGCCCCCACTTCCCAGGGAGCCAAAGGAACGAAATCCTGTATCAAAAGAAGAAAAAACACCCCCAAAAGCTGGAAATTCACTGAAGGCAGAGAAAAGGGGTGCAGACGCTCTGCTTCTGCTTCCCCAGCAGTT…	AAAAAAGTCCGCTATTCCTCCAGATGTGCTTAAAGTCAAATGTGGACTGGAATTACTTGGTGTCAATGCGGAGTAACTGCTCTTTGCTATTTATTATGAAGGACTTTAACTCAACTCTCCATCTTCCTCCACTTCCACCCTTTCTTGGCCATTCTCAATGATTCTCTTGGTGGTGATTTTTTTACCATCAACTATTTCAGTGGAAGTCGACATGGACTTGAAGCTGCCTGTCCCATCACTACCGTAGGACATGCAGAAGGAAGAAAGGCCCCCACTTCCCAGGGAGCCAAAGGAACGAAATCCTGTATCAAAAGAAGAAAAAACACCCCCAAAAGCTGGAAATTCACTGAAGGCAGAGAAAAGGGGTGCAGACGCTCTGCTTCTGCTTCCCCAGCAGTT…	-	novel	.	UCEC		TCGA-EY-A1GK-01A-11D-A13L-09	TCGA-EY-A1GK-10A-01D-A13O-09	AAAAAAGTCCGCTATTCCTCCAGATGTGCTTAAAGTCAAATGTGGACTGGAATTACTTGGTGTCAATGCGGAGTAACTGCTCTTTGCTATTTATTATGAAGGACTTTAACTCAACTCTCCATCTTCCTCCACTTCCACCCTTTCTTGGCCATTCTCAATGATTCTCTTGGTGGTGATTTTTTTACCATCAACTATTTCAGTGGAAGTCGACATGGACTTGAAGCTGCCTGTCCCATCACTACCGTAGGACATGCAGAAGGAAGAAAGGCCCCCACTTCCCAGGGAGCCAAAGGAACGAAATCCTGTATCAAAAGAAGAAAAAACACCCCCAAAAGCTGGAAATTCACTGAAGGCAGAGAAAAGGGGTGCAGACGCTCTGCTTCTGCTTCCCCAGCAGTT…	AAAAAAGTCCGCTATTCCTCCAGATGTGCTTAAAGTCAAATGTGGACTGGAATTACTTGGTGTCAATGCGGAGTAACTGCTCTTTGCTATTTATTATGAAGGACTTTAACTCAACTCTCCATCTTCCTCCACTTCCACCCTTTCTTGGCCATTCTCAATGATTCTCTTGGTGGTGATTTTTTTACCATCAACTATTTCAGTGGAAGTCGACATGGACTTGAAGCTGCCTGTCCCATCACTACCGTAGGACATGCAGAAGGAAGAAAGGCCCCCACTTCCCAGGGAGCCAAAGGAACGAAATCCTGTATCAAAAGAAGAAAAAACACCCCCAAAAGCTGGAAATTCACTGAAGGCAGAGAAAAGGGGTGCAGACGCTCTGCTTCTGCTTCCCCAGCAGTT…	.	.	.	.	.	.	.	.	.	.	.	.	.	.	.	c.856-23892_856-12540delGTCCGCTATTCCTCCAGATGTGCTTAAAGTCAAATGTGGACTGGAATTACTTGGTGTCAATGCGGAGTAACTGCTCTTTGCTATTTATTATGAAGGACTTTAACTCAACTCTCCATCTTCCTCCACTTCCACCCTTTCTTGGCCATTCTCAATGATTCTCTTGGTGGTGATTTTTTTACCATCAACTATTTCAGTGGAAGTCGACATGGACTTGAAGCTGCCTGTCCCATCACTACCGTAGGACATGCAGAAGGAAGAAAGGCCCCCACTTCCCAGGGAGCCAAAGGAACGAAATCCTGTATCAAAAGAAGAAAAAACACCCCCAAAAGCTGGAAATTCACTGAAGGCAGAGAAAAGGGGTGCAGACGCTCTGCT…	.	.	ENST00000344644	.	43	34	9	35	35	0	UGT1A10,intron_variant,,ENST00000373445,;UGT1A4,intron_variant,,ENST00000373409,;UGT1A6,intron_variant,,ENST00000305139,;UGT1A3,intron_variant,,ENST00000482026,;UGT1A6,intron_variant,,ENST00000373424,;UGT1A8,intron_variant,,ENST00000608381,;UGT1A7,intron_variant,,ENST00000373426,;UGT1A8,intron_variant,,ENST00000609637,;UGT1A8,intron_variant,,ENST00000609767,;UGT1A5,intron_variant,,ENST00000373414…	-	ENSG00000242515
UGT1A10	0	.	GRCh37	2	234651781	234651781	+	Intron	DEL	A	A	-	novel	.	UCEC		TCGA-EY-A2OM-01A-11D-A18P-09	TCGA-EY-A2OM-10A-01D-A18P-09	A	A	.	.	.	.	.	.	.	.	.	.	.	.	.	.	.	c.856-23893delA	.	.	ENST00000344644	.	98	69	29	61	61	0	UGT1A10,intron_variant,,ENST00000373445,;UGT1A4,intron_variant,,ENST00000373409,;UGT1A6,intron_variant,,ENST00000305139,;UGT1A3,intron_variant,,ENST00000482026,;UGT1A6,intron_variant,,ENST00000373424,;UGT1A8,intron_variant,,ENST00000608381,;UGT1A7,intron_variant,,ENST00000373426,;UGT1A8,intron_variant,,ENST00000609637,;UGT1A8,intron_variant,,ENST00000609767,;UGT1A5,intron_variant,,ENST00000373414…	-	ENSG00000242515
UGT1A10	0	.	GRCh37	2	234676568	234676568	+	Frame_Shift_Del	DEL	A	A	-	rs72551351	.	UCEC		TCGA-EY-A548-01A-11D-A27P-09	TCGA-EY-A548-10A-01D-A27P-09	A	A	.	.	.	.	.	.	.	.	.	.	.	.	.	.	.	c.1064delA	p.Asn355ThrfsTer8	p.N355Tfs*8	ENST00000344644	3/5	53	39	14	55	55	0	UGT1A10,frameshift_variant,p.Asn355ThrfsTer8,ENST00000373445,;UGT1A4,frameshift_variant,p.Asn359ThrfsTer8,ENST00000373409,;UGT1A6,frameshift_variant,p.Asn357ThrfsTer8,ENST00000305139,;UGT1A3,frameshift_variant,p.Asn359ThrfsTer8,ENST00000482026,;UGT1A6,frameshift_variant,p.Asn90ThrfsTer8,ENST00000373424,;UGT1A8,frameshift_variant,p.Asn358ThrfsTer8,ENST00000608383,;UGT1A8,frameshift_variant,p.Asn35…	-	ENSG00000242515
UGT1A10	0	.	GRCh37	2	234545961	234545961	+	Missense_Mutation	SNP	G	G	A	rs142662851	.	UCEC		TCGA-EY-A549-01A-11D-A27P-09	TCGA-EY-A549-10A-01D-A27P-09	G	G	.	.	.	.	.	.	.	.	.	.	.	.	.	.	.	c.793G>A	p.Val265Met	p.V265M	ENST00000344644	1/5	63	40	23	77	77	0	UGT1A10,missense_variant,p.Val265Met,ENST00000373445,;UGT1A10,missense_variant,p.Val265Met,ENST00000344644,;UGT1A8,intron_variant,,ENST00000373450,;	A	ENSG00000242515
UGT1A10	0	.	GRCh37	2	234545296	234545296	+	Missense_Mutation	SNP	C	C	T	rs769189062	.	UCEC		TCGA-QF-A5YS-01A-11D-A31U-09	TCGA-QF-A5YS-10A-01D-A31U-09	C	C	.	.	.	.	.	.	.	.	.	.	.	.	.	.	.	c.128C>T	p.Ser43Leu	p.S43L	ENST00000344644	1/5	100	92	8	141	141	0	UGT1A10,missense_variant,p.Ser43Leu,ENST00000373445,;UGT1A10,missense_variant,p.Ser43Leu,ENST00000344644,;UGT1A8,intron_variant,,ENST00000373450,;	T	ENSG00000242515
UGT1A3	0	.	GRCh37	2	234638397	234638397	+	Missense_Mutation	SNP	C	C	A	novel	.	ACC		TCGA-OR-A5JA-01A-11D-A29I-10	TCGA-OR-A5JA-10A-01D-A29L-10	C	C	.	.	.	.	.	.	.	.	.	.	.	.	.	.	.	c.625C>A	p.Gln209Lys	p.Q209K	ENST00000482026	1/5	198	154	44	259	259	0	UGT1A3,missense_variant,p.Gln209Lys,ENST00000482026,;UGT1A8,missense_variant,p.Gln209Lys,ENST00000609767,;UGT1A10,intron_variant,,ENST00000373445,;UGT1A4,intron_variant,,ENST00000373409,;UGT1A6,intron_variant,,ENST00000305139,;UGT1A6,intron_variant,,ENST00000373424,;UGT1A8,intron_variant,,ENST00000608381,;UGT1A7,intron_variant,,ENST00000373426,;UGT1A8,intron_variant,,ENST00000609637,;UGT1A5,intro…	A	ENSG00000243135
UGT1A3	0	.	GRCh37	2	234638607	234638607	+	Missense_Mutation	SNP	A	A	G	novel	.	BLCA		TCGA-DK-AA6X-01A-12D-A42E-08	TCGA-DK-AA6X-10A-01D-A42H-08	A	A	.	.	.	.	.	.	.	.	.	.	.	.	.	.	.	c.835A>G	p.Ile279Val	p.I279V	ENST00000482026	1/5	123	84	39	153	153	0	UGT1A3,missense_variant,p.Ile279Val,ENST00000482026,;UGT1A8,missense_variant,p.Ile279Val,ENST00000609767,;UGT1A10,intron_variant,,ENST00000373445,;UGT1A4,intron_variant,,ENST00000373409,;UGT1A6,intron_variant,,ENST00000305139,;UGT1A6,intron_variant,,ENST00000373424,;UGT1A8,intron_variant,,ENST00000608381,;UGT1A7,intron_variant,,ENST00000373426,;UGT1A8,intron_variant,,ENST00000609637,;UGT1A5,intro…	G	ENSG00000243135
UGT1A3	0	.	GRCh37	2	234637770	234637770	+	5'UTR	SNP	G	G	A	novel	.	BLCA		TCGA-E7-A7XN-01A-11D-A34U-08	TCGA-E7-A7XN-10A-01D-A34X-08	G	G	.	.	.	.	.	.	.	.	.	.	.	.	.	.	.	c.-3G>A	.	.	ENST00000482026	1/5	88	71	16	47	47	0	UGT1A3,5_prime_UTR_variant,,ENST00000482026,;UGT1A10,intron_variant,,ENST00000373445,;UGT1A4,intron_variant,,ENST00000373409,;UGT1A6,intron_variant,,ENST00000305139,;UGT1A6,intron_variant,,ENST00000373424,;UGT1A8,intron_variant,,ENST00000608381,;UGT1A7,intron_variant,,ENST00000373426,;UGT1A8,intron_variant,,ENST00000609637,;UGT1A5,intron_variant,,ENST00000373414,;UGT1A6,intron_variant,,ENST000004…	A	ENSG00000243135
UGT1A3	0	.	GRCh37	2	234638530	234638530	+	Missense_Mutation	SNP	C	C	T	rs771925903	.	BLCA		TCGA-GC-A3RB-01A-12D-A21Z-08	TCGA-GC-A3RB-10A-01D-A21Z-08	C	C	.	.	.	.	.	.	.	.	.	.	.	.	.	.	.	c.758C>T	p.Ser253Phe	p.S253F	ENST00000482026	1/5	293	258	35	409	409	0	UGT1A3,missense_variant,p.Ser253Phe,ENST00000482026,;UGT1A8,missense_variant,p.Ser253Phe,ENST00000609767,;UGT1A10,intron_variant,,ENST00000373445,;UGT1A4,intron_variant,,ENST00000373409,;UGT1A6,intron_variant,,ENST00000305139,;UGT1A6,intron_variant,,ENST00000373424,;UGT1A8,intron_variant,,ENST00000608381,;UGT1A7,intron_variant,,ENST00000373426,;UGT1A8,intron_variant,,ENST00000609637,;UGT1A5,intro…	T	ENSG00000243135
UGT1A3	0	.	GRCh37	2	234638033	234638034	+	Frame_Shift_Ins	INS	-	-	GA	novel	.	BLCA		TCGA-XF-A9SG-01A-12D-A42E-08	TCGA-XF-A9SG-10A-01D-A42H-08	-	-	.	.	.	.	.	.	.	.	.	.	.	.	.	.	.	c.262_263dupGA	p.Phe89AsnfsTer20	p.F89Nfs*20	ENST00000482026	1/5	147	117	30	114	114	0	UGT1A3,frameshift_variant,p.Phe89AsnfsTer20,ENST00000482026,;UGT1A8,frameshift_variant,p.Phe89AsnfsTer20,ENST00000609767,;UGT1A10,intron_variant,,ENST00000373445,;UGT1A4,intron_variant,,ENST00000373409,;UGT1A6,intron_variant,,ENST00000305139,;UGT1A6,intron_variant,,ENST00000373424,;UGT1A8,intron_variant,,ENST00000608381,;UGT1A7,intron_variant,,ENST00000373426,;UGT1A8,intron_variant,,ENST000006096…	GA	ENSG00000243135
UGT1A3	0	.	GRCh37	2	234638460	234638460	+	Missense_Mutation	SNP	C	C	A	rs776482922	.	LIHC		TCGA-C4-A0F1-01A-11D-A10S-08	TCGA-C4-A0F1-10A-01D-A10S-08	C	C	.	.	.	.	.	.	.	.	.	.	.	.	.	.	.	c.688C>A	p.Pro230Thr	p.P230T	ENST00000482026	1/5	363	275	88	410	410	0	UGT1A3,missense_variant,p.Pro230Thr,ENST00000482026,;UGT1A8,missense_variant,p.Pro230Thr,ENST00000609767,;UGT1A10,intron_variant,,ENST00000373445,;UGT1A4,intron_variant,,ENST00000373409,;UGT1A6,intron_variant,,ENST00000305139,;UGT1A6,intron_variant,,ENST00000373424,;UGT1A8,intron_variant,,ENST00000608381,;UGT1A7,intron_variant,,ENST00000373426,;UGT1A8,intron_variant,,ENST00000609637,;UGT1A5,intro…	A	ENSG00000243135
UGT1A3	0	.	GRCh37	2	234638355	234638355	+	Missense_Mutation	SNP	C	C	T	.	.	BRCA		TCGA-A2-A04T-01A-21W-A050-09	TCGA-A2-A04T-10A-01W-A055-09	C	C	.	.	.	.	.	.	.	.	.	.	.	.	.	.	.	c.583C>T	p.Pro195Ser	p.P195S	ENST00000482026	1/5	479	348	131	268	268	0	UGT1A3,missense_variant,p.Pro195Ser,ENST00000482026,;UGT1A8,missense_variant,p.Pro195Ser,ENST00000609767,;UGT1A10,intron_variant,,ENST00000373445,;UGT1A4,intron_variant,,ENST00000373409,;UGT1A6,intron_variant,,ENST00000305139,;UGT1A6,intron_variant,,ENST00000373424,;UGT1A8,intron_variant,,ENST00000608381,;UGT1A7,intron_variant,,ENST00000373426,;UGT1A8,intron_variant,,ENST00000609637,;UGT1A5,intro…	T	ENSG00000243135
UGT1A3	0	.	GRCh37	2	234638270	234638270	+	Silent	SNP	G	G	A	rs563451648	.	BRCA		TCGA-AN-A046-01A-21W-A050-09	TCGA-AN-A046-10A-01W-A055-09	G	G	.	.	.	.	.	.	.	.	.	.	.	.	.	.	.	c.498G>A	p.%3D	p.S166S	ENST00000482026	1/5	311	225	85	381	381	0	UGT1A3,synonymous_variant,p.%3D,ENST00000482026,;UGT1A8,synonymous_variant,p.%3D,ENST00000609767,;UGT1A10,intron_variant,,ENST00000373445,;UGT1A4,intron_variant,,ENST00000373409,;UGT1A6,intron_variant,,ENST00000305139,;UGT1A6,intron_variant,,ENST00000373424,;UGT1A8,intron_variant,,ENST00000608381,;UGT1A7,intron_variant,,ENST00000373426,;UGT1A8,intron_variant,,ENST00000609637,;UGT1A5,intron_varian…	A	ENSG00000243135
UGT1A3	0	.	GRCh37	2	234638190	234638190	+	Missense_Mutation	SNP	C	C	A	.	.	BRCA		TCGA-AN-A0FL-01A-11W-A050-09	TCGA-AN-A0FL-10A-01W-A055-09	C	C	.	.	.	.	.	.	.	.	.	.	.	.	.	.	.	c.418C>A	p.His140Asn	p.H140N	ENST00000482026	1/5	265	14	250	297	297	0	UGT1A3,missense_variant,p.His140Asn,ENST00000482026,;UGT1A8,missense_variant,p.His140Asn,ENST00000609767,;UGT1A10,intron_variant,,ENST00000373445,;UGT1A4,intron_variant,,ENST00000373409,;UGT1A6,intron_variant,,ENST00000305139,;UGT1A6,intron_variant,,ENST00000373424,;UGT1A8,intron_variant,,ENST00000608381,;UGT1A7,intron_variant,,ENST00000373426,;UGT1A8,intron_variant,,ENST00000609637,;UGT1A5,intro…	A	ENSG00000243135
UGT1A3	0	.	GRCh37	2	234638186	234638186	+	Silent	SNP	C	C	T	.	.	BRCA		TCGA-AO-A0J4-01A-11W-A050-09	TCGA-AO-A0J4-10A-01W-A055-09	C	C	.	.	.	.	.	.	.	.	.	.	.	.	.	.	.	c.414C>T	p.%3D	p.I138I	ENST00000482026	1/5	304	199	105	293	293	0	UGT1A3,synonymous_variant,p.%3D,ENST00000482026,;UGT1A8,synonymous_variant,p.%3D,ENST00000609767,;UGT1A10,intron_variant,,ENST00000373445,;UGT1A4,intron_variant,,ENST00000373409,;UGT1A6,intron_variant,,ENST00000305139,;UGT1A6,intron_variant,,ENST00000373424,;UGT1A8,intron_variant,,ENST00000608381,;UGT1A7,intron_variant,,ENST00000373426,;UGT1A8,intron_variant,,ENST00000609637,;UGT1A5,intron_varian…	T	ENSG00000243135
UGT1A3	0	.	GRCh37	2	234637988	234637988	+	Missense_Mutation	SNP	G	G	T	rs368262266	.	COAD		TCGA-AA-3977-01A-01W-0995-10	TCGA-AA-3977-10A-01W-1982-10	G	G	.	.	.	.	.	.	.	.	.	.	.	.	.	.	.	c.216G>T	p.Glu72Asp	p.E72D	ENST00000482026	1/5	16	8	8	139	139	0	UGT1A3,missense_variant,p.Glu72Asp,ENST00000482026,;UGT1A8,missense_variant,p.Glu72Asp,ENST00000609767,;UGT1A10,intron_variant,,ENST00000373445,;UGT1A4,intron_variant,,ENST00000373409,;UGT1A6,intron_variant,,ENST00000305139,;UGT1A6,intron_variant,,ENST00000373424,;UGT1A8,intron_variant,,ENST00000608381,;UGT1A7,intron_variant,,ENST00000373426,;UGT1A8,intron_variant,,ENST00000609637,;UGT1A5,intron_…	T	ENSG00000243135
UGT1A3	0	.	GRCh37	2	234637983	234637983	+	Nonsense_Mutation	SNP	G	G	T	rs775234844	.	COAD		TCGA-AA-A00N-01A-02D-A17O-10	TCGA-AA-A00N-10A-01D-A17O-10	G	G	.	.	.	.	.	.	.	.	.	.	.	.	.	.	.	c.211G>T	p.Glu71Ter	p.E71*	ENST00000482026	1/5	130	105	25	273	272	0	UGT1A3,stop_gained,p.Glu71Ter,ENST00000482026,;UGT1A8,stop_gained,p.Glu71Ter,ENST00000609767,;UGT1A10,intron_variant,,ENST00000373445,;UGT1A4,intron_variant,,ENST00000373409,;UGT1A6,intron_variant,,ENST00000305139,;UGT1A6,intron_variant,,ENST00000373424,;UGT1A8,intron_variant,,ENST00000608381,;UGT1A7,intron_variant,,ENST00000373426,;UGT1A8,intron_variant,,ENST00000609637,;UGT1A5,intron_variant,,E…	T	ENSG00000243135
UGT1A3	0	.	GRCh37	2	234637957	234637957	+	Frame_Shift_Del	DEL	C	C	-	rs367893745	.	COAD		TCGA-AY-6197-01A-11D-1719-10	TCGA-AY-6197-10A-01D-1719-10	C	C	.	.	.	.	.	.	.	.	.	.	.	.	.	.	.	c.188delC	p.Pro63GlnfsTer3	p.P63Qfs*3	ENST00000482026	1/5	282	201	81	79	79	0	UGT1A3,frameshift_variant,p.Pro63GlnfsTer3,ENST00000482026,;UGT1A8,frameshift_variant,p.Pro63GlnfsTer3,ENST00000609767,;UGT1A10,intron_variant,,ENST00000373445,;UGT1A4,intron_variant,,ENST00000373409,;UGT1A6,intron_variant,,ENST00000305139,;UGT1A6,intron_variant,,ENST00000373424,;UGT1A8,intron_variant,,ENST00000608381,;UGT1A7,intron_variant,,ENST00000373426,;UGT1A8,intron_variant,,ENST00000609637…	-	ENSG00000243135
UGT1A3	0	.	GRCh37	2	234638523	234638523	+	Missense_Mutation	SNP	C	C	T	novel	.	COAD		TCGA-WS-AB45-01A-11D-A40P-10	TCGA-WS-AB45-10A-01D-A40P-10	C	C	.	.	.	.	.	.	.	.	.	.	.	.	.	.	.	c.751C>T	p.His251Tyr	p.H251Y	ENST00000482026	1/5	84	73	11	112	112	0	UGT1A3,missense_variant,p.His251Tyr,ENST00000482026,;UGT1A8,missense_variant,p.His251Tyr,ENST00000609767,;UGT1A10,intron_variant,,ENST00000373445,;UGT1A4,intron_variant,,ENST00000373409,;UGT1A6,intron_variant,,ENST00000305139,;UGT1A6,intron_variant,,ENST00000373424,;UGT1A8,intron_variant,,ENST00000608381,;UGT1A7,intron_variant,,ENST00000373426,;UGT1A8,intron_variant,,ENST00000609637,;UGT1A5,intro…	T	ENSG00000243135
UGT1A3	0	.	GRCh37	2	234638243	234638243	+	Silent	SNP	C	C	T	rs375083511	.	DLBC		TCGA-FF-8042-01A-11D-2210-10	TCGA-FF-8042-10A-01D-2210-10	C	C	.	.	.	.	.	.	.	.	.	.	.	.	.	.	.	c.471C>T	p.%3D	p.C157C	ENST00000482026	1/5	237	142	94	268	267	0	UGT1A3,synonymous_variant,p.%3D,ENST00000482026,;UGT1A8,synonymous_variant,p.%3D,ENST00000609767,;UGT1A10,intron_variant,,ENST00000373445,;UGT1A4,intron_variant,,ENST00000373409,;UGT1A6,intron_variant,,ENST00000305139,;UGT1A6,intron_variant,,ENST00000373424,;UGT1A8,intron_variant,,ENST00000608381,;UGT1A7,intron_variant,,ENST00000373426,;UGT1A8,intron_variant,,ENST00000609637,;UGT1A5,intron_varian…	T	ENSG00000243135
UGT1A3	0	.	GRCh37	2	234638231	234638231	+	Silent	SNP	C	C	T	.	.	ESCA		TCGA-VR-AA4D-01A-11D-A37C-09	TCGA-VR-AA4D-10A-01D-A37F-09	C	C	.	.	.	.	.	.	.	.	.	.	.	.	.	.	.	c.459C>T	p.%3D	p.P153P	ENST00000482026	1/5	84	65	18	76	76	0	UGT1A3,synonymous_variant,p.%3D,ENST00000482026,;UGT1A8,synonymous_variant,p.%3D,ENST00000609767,;UGT1A10,intron_variant,,ENST00000373445,;UGT1A4,intron_variant,,ENST00000373409,;UGT1A6,intron_variant,,ENST00000305139,;UGT1A6,intron_variant,,ENST00000373424,;UGT1A8,intron_variant,,ENST00000608381,;UGT1A7,intron_variant,,ENST00000373426,;UGT1A8,intron_variant,,ENST00000609637,;UGT1A5,intron_varian…	T	ENSG00000243135
UGT1A3	0	.	GRCh37	2	234638325	234638325	+	Missense_Mutation	SNP	A	A	G	novel	.	GBM		TCGA-06-0125-02A-11D-2280-08	TCGA-06-0125-10A-01D-1490-08	A	A	.	.	.	.	.	.	.	.	.	.	.	.	.	.	.	c.553A>G	p.Thr185Ala	p.T185A	ENST00000482026	1/5	211	153	58	384	384	0	UGT1A3,missense_variant,p.Thr185Ala,ENST00000482026,;UGT1A8,missense_variant,p.Thr185Ala,ENST00000609767,;UGT1A10,intron_variant,,ENST00000373445,;UGT1A4,intron_variant,,ENST00000373409,;UGT1A6,intron_variant,,ENST00000305139,;UGT1A6,intron_variant,,ENST00000373424,;UGT1A8,intron_variant,,ENST00000608381,;UGT1A7,intron_variant,,ENST00000373426,;UGT1A8,intron_variant,,ENST00000609637,;UGT1A5,intro…	G	ENSG00000243135
UGT1A3	0	.	GRCh37	2	234637924	234637924	+	Missense_Mutation	SNP	T	T	C	novel	.	GBM		TCGA-RR-A6KB-01A-12D-A33T-08	TCGA-RR-A6KB-10A-01D-A33W-08	T	T	.	.	.	.	.	.	.	.	.	.	.	.	.	.	.	c.152T>C	p.Leu51Pro	p.L51P	ENST00000482026	1/5	78	56	22	72	72	0	UGT1A3,missense_variant,p.Leu51Pro,ENST00000482026,;UGT1A8,missense_variant,p.Leu51Pro,ENST00000609767,;UGT1A10,intron_variant,,ENST00000373445,;UGT1A4,intron_variant,,ENST00000373409,;UGT1A6,intron_variant,,ENST00000305139,;UGT1A6,intron_variant,,ENST00000373424,;UGT1A8,intron_variant,,ENST00000608381,;UGT1A7,intron_variant,,ENST00000373426,;UGT1A8,intron_variant,,ENST00000609637,;UGT1A5,intron_…	C	ENSG00000243135
UGT1A3	0	.	GRCh37	2	234637859	234637859	+	Silent	SNP	A	A	G	rs760379481	.	HNSC		TCGA-CQ-6220-01A-11D-1912-08	TCGA-CQ-6220-10A-01D-1912-08	A	A	.	.	.	.	.	.	.	.	.	.	.	.	.	.	.	c.87A>G	p.%3D	p.G29G	ENST00000482026	1/5	60	49	11	76	76	0	UGT1A3,synonymous_variant,p.%3D,ENST00000482026,;UGT1A8,synonymous_variant,p.%3D,ENST00000609767,;UGT1A10,intron_variant,,ENST00000373445,;UGT1A4,intron_variant,,ENST00000373409,;UGT1A6,intron_variant,,ENST00000305139,;UGT1A6,intron_variant,,ENST00000373424,;UGT1A8,intron_variant,,ENST00000608381,;UGT1A7,intron_variant,,ENST00000373426,;UGT1A8,intron_variant,,ENST00000609637,;UGT1A5,intron_varian…	G	ENSG00000243135
UGT1A3	0	.	GRCh37	2	234637866	234637866	+	Silent	SNP	T	T	C	rs754967236	.	HNSC		TCGA-CQ-6220-01A-11D-1912-08	TCGA-CQ-6220-10A-01D-1912-08	T	T	.	.	.	.	.	.	.	.	.	.	.	.	.	.	.	c.94T>C	p.%3D	p.L32L	ENST00000482026	1/5	63	55	8	74	74	0	UGT1A3,synonymous_variant,p.%3D,ENST00000482026,;UGT1A8,synonymous_variant,p.%3D,ENST00000609767,;UGT1A10,intron_variant,,ENST00000373445,;UGT1A4,intron_variant,,ENST00000373409,;UGT1A6,intron_variant,,ENST00000305139,;UGT1A6,intron_variant,,ENST00000373424,;UGT1A8,intron_variant,,ENST00000608381,;UGT1A7,intron_variant,,ENST00000373426,;UGT1A8,intron_variant,,ENST00000609637,;UGT1A5,intron_varian…	C	ENSG00000243135
UGT1A3	0	.	GRCh37	2	234638471	234638471	+	Silent	SNP	C	C	T	rs770263678	.	HNSC		TCGA-F7-A624-01A-22D-A30E-08	TCGA-F7-A624-10A-01D-A30H-08	C	C	.	.	.	.	.	.	.	.	.	.	.	.	.	.	.	c.699C>T	p.%3D	p.S233S	ENST00000482026	1/5	367	334	33	255	255	0	UGT1A3,synonymous_variant,p.%3D,ENST00000482026,;UGT1A8,synonymous_variant,p.%3D,ENST00000609767,;UGT1A10,intron_variant,,ENST00000373445,;UGT1A4,intron_variant,,ENST00000373409,;UGT1A6,intron_variant,,ENST00000305139,;UGT1A6,intron_variant,,ENST00000373424,;UGT1A8,intron_variant,,ENST00000608381,;UGT1A7,intron_variant,,ENST00000373426,;UGT1A8,intron_variant,,ENST00000609637,;UGT1A5,intron_varian…	T	ENSG00000243135
UGT1A3	0	.	GRCh37	2	234638593	234638599	+	Frame_Shift_Del	DEL	TCTTCAT	TCTTCAT	-	novel	.	KIRC		TCGA-BP-5174-01A-01D-1429-08	TCGA-BP-5174-11A-01D-1429-08	TCTTCAT	TCTTCAT	.	.	.	.	.	.	.	.	.	.	.	.	.	.	.	c.822_828delCTTCATT	p.Phe275GlyfsTer90	p.F275Gfs*90	ENST00000482026	1/5	283	230	53	220	220	0	UGT1A3,frameshift_variant,p.Phe275GlyfsTer90,ENST00000482026,;UGT1A8,frameshift_variant,p.Phe275GlyfsTer90,ENST00000609767,;UGT1A10,intron_variant,,ENST00000373445,;UGT1A4,intron_variant,,ENST00000373409,;UGT1A6,intron_variant,,ENST00000305139,;UGT1A6,intron_variant,,ENST00000373424,;UGT1A8,intron_variant,,ENST00000608381,;UGT1A7,intron_variant,,ENST00000373426,;UGT1A8,intron_variant,,ENST0000060…	-	ENSG00000243135
UGT1A3	0	.	GRCh37	2	234638329	234638329	+	Missense_Mutation	SNP	A	A	G	novel	.	KIRP		TCGA-A4-8311-01A-11D-2396-08	TCGA-A4-8311-10A-01D-2396-08	A	A	.	.	.	.	.	.	.	.	.	.	.	.	.	.	.	c.557A>G	p.Gln186Arg	p.Q186R	ENST00000482026	1/5	230	120	110	216	216	0	UGT1A3,missense_variant,p.Gln186Arg,ENST00000482026,;UGT1A8,missense_variant,p.Gln186Arg,ENST00000609767,;UGT1A10,intron_variant,,ENST00000373445,;UGT1A4,intron_variant,,ENST00000373409,;UGT1A6,intron_variant,,ENST00000305139,;UGT1A6,intron_variant,,ENST00000373424,;UGT1A8,intron_variant,,ENST00000608381,;UGT1A7,intron_variant,,ENST00000373426,;UGT1A8,intron_variant,,ENST00000609637,;UGT1A5,intro…	G	ENSG00000243135
UGT1A3	0	.	GRCh37	2	234637943	234637943	+	Silent	SNP	G	G	A	rs374045195	.	KIRP		TCGA-BQ-5881-01A-11D-1589-08	TCGA-BQ-5881-11A-01D-1589-08	G	G	.	.	.	.	.	.	.	.	.	.	.	.	.	.	.	c.171G>A	p.%3D	p.Q57Q	ENST00000482026	1/5	67	48	19	64	64	0	UGT1A3,synonymous_variant,p.%3D,ENST00000482026,;UGT1A8,synonymous_variant,p.%3D,ENST00000609767,;UGT1A10,intron_variant,,ENST00000373445,;UGT1A4,intron_variant,,ENST00000373409,;UGT1A6,intron_variant,,ENST00000305139,;UGT1A6,intron_variant,,ENST00000373424,;UGT1A8,intron_variant,,ENST00000608381,;UGT1A7,intron_variant,,ENST00000373426,;UGT1A8,intron_variant,,ENST00000609637,;UGT1A5,intron_varian…	A	ENSG00000243135
UGT1A3	0	.	GRCh37	2	234638590	234638590	+	Missense_Mutation	SNP	T	T	C	novel	.	KIRP		TCGA-V9-A7HT-01A-11D-A33Q-10	TCGA-V9-A7HT-10A-01D-A33Q-10	T	T	.	.	.	.	.	.	.	.	.	.	.	.	.	.	.	c.818T>C	p.Met273Thr	p.M273T	ENST00000482026	1/5	76	49	27	110	110	0	UGT1A3,missense_variant,p.Met273Thr,ENST00000482026,;UGT1A8,missense_variant,p.Met273Thr,ENST00000609767,;UGT1A10,intron_variant,,ENST00000373445,;UGT1A4,intron_variant,,ENST00000373409,;UGT1A6,intron_variant,,ENST00000305139,;UGT1A6,intron_variant,,ENST00000373424,;UGT1A8,intron_variant,,ENST00000608381,;UGT1A7,intron_variant,,ENST00000373426,;UGT1A8,intron_variant,,ENST00000609637,;UGT1A5,intro…	C	ENSG00000243135
UGT1A3	0	.	GRCh37	2	234638007	234638007	+	Missense_Mutation	SNP	A	A	G	rs781679584	.	LAML		TCGA-AB-2826-03B-01W-0728-08	TCGA-AB-2826-11B-01W-0728-08	A	A	.	.	.	.	.	.	.	.	.	.	.	.	.	.	.	c.235A>G	p.Thr79Ala	p.T79A	ENST00000482026	1/5	562	543	18	239	239	0	UGT1A3,missense_variant,p.Thr79Ala,ENST00000482026,;UGT1A8,missense_variant,p.Thr79Ala,ENST00000609767,;UGT1A10,intron_variant,,ENST00000373445,;UGT1A4,intron_variant,,ENST00000373409,;UGT1A6,intron_variant,,ENST00000305139,;UGT1A6,intron_variant,,ENST00000373424,;UGT1A8,intron_variant,,ENST00000608381,;UGT1A7,intron_variant,,ENST00000373426,;UGT1A8,intron_variant,,ENST00000609637,;UGT1A5,intron_…	G	ENSG00000243135
UGT1A3	0	.	GRCh37	2	234638229	234638229	+	Missense_Mutation	SNP	C	C	T	novel	.	LIHC		TCGA-CC-A5UE-01A-11D-A28X-10	TCGA-CC-A5UE-10A-01D-A28X-10	C	C	.	.	.	.	.	.	.	.	.	.	.	.	.	.	.	c.457C>T	p.Pro153Ser	p.P153S	ENST00000482026	1/5	207	175	32	197	196	1	UGT1A3,missense_variant,p.Pro153Ser,ENST00000482026,;UGT1A8,missense_variant,p.Pro153Ser,ENST00000609767,;UGT1A10,intron_variant,,ENST00000373445,;UGT1A4,intron_variant,,ENST00000373409,;UGT1A6,intron_variant,,ENST00000305139,;UGT1A6,intron_variant,,ENST00000373424,;UGT1A8,intron_variant,,ENST00000608381,;UGT1A7,intron_variant,,ENST00000373426,;UGT1A8,intron_variant,,ENST00000609637,;UGT1A5,intro…	T	ENSG00000243135
UGT1A3	0	.	GRCh37	2	234638003	234638003	+	Silent	SNP	G	G	T	novel	.	LIHC		TCGA-DD-A4NB-01A-12D-A25V-10	TCGA-DD-A4NB-11A-11D-A25V-10	G	G	.	.	.	.	.	.	.	.	.	.	.	.	.	.	.	c.231G>T	p.%3D	p.L77L	ENST00000482026	1/5	207	164	42	203	202	1	UGT1A3,synonymous_variant,p.%3D,ENST00000482026,;UGT1A8,synonymous_variant,p.%3D,ENST00000609767,;UGT1A10,intron_variant,,ENST00000373445,;UGT1A4,intron_variant,,ENST00000373409,;UGT1A6,intron_variant,,ENST00000305139,;UGT1A6,intron_variant,,ENST00000373424,;UGT1A8,intron_variant,,ENST00000608381,;UGT1A7,intron_variant,,ENST00000373426,;UGT1A8,intron_variant,,ENST00000609637,;UGT1A5,intron_varian…	T	ENSG00000243135
UGT1A3	0	.	GRCh37	2	234638551	234638551	+	Missense_Mutation	SNP	A	A	G	novel	.	LIHC		TCGA-DD-AADQ-01A-11D-A40R-10	TCGA-DD-AADQ-10A-01D-A40U-10	A	A	.	.	.	.	.	.	.	.	.	.	.	.	.	.	.	c.779A>G	p.Asp260Gly	p.D260G	ENST00000482026	1/5	130	88	42	133	133	0	UGT1A3,missense_variant,p.Asp260Gly,ENST00000482026,;UGT1A8,missense_variant,p.Asp260Gly,ENST00000609767,;UGT1A10,intron_variant,,ENST00000373445,;UGT1A4,intron_variant,,ENST00000373409,;UGT1A6,intron_variant,,ENST00000305139,;UGT1A6,intron_variant,,ENST00000373424,;UGT1A8,intron_variant,,ENST00000608381,;UGT1A7,intron_variant,,ENST00000373426,;UGT1A8,intron_variant,,ENST00000609637,;UGT1A5,intro…	G	ENSG00000243135
UGT1A3	0	.	GRCh37	2	234638177	234638177	+	Missense_Mutation	SNP	G	G	T	rs757870746	.	LUAD	1	TCGA-44-3919-01A-02D-1458-08	TCGA-44-3919-10A-01D-1458-08	G	G	.	.	.	.	.	.	.	.	.	.	.	.	.	.	.	c.405G>T	p.Glu135Asp	p.E135D	ENST00000482026	1/5	454	347	107	479	479	0	UGT1A3,missense_variant,p.Glu135Asp,ENST00000482026,;UGT1A8,missense_variant,p.Glu135Asp,ENST00000609767,;UGT1A10,intron_variant,,ENST00000373445,;UGT1A4,intron_variant,,ENST00000373409,;UGT1A6,intron_variant,,ENST00000305139,;UGT1A6,intron_variant,,ENST00000373424,;UGT1A8,intron_variant,,ENST00000608381,;UGT1A7,intron_variant,,ENST00000373426,;UGT1A8,intron_variant,,ENST00000609637,;UGT1A5,intro…	T	ENSG00000243135
UGT1A3	0	.	GRCh37	2	234637908	234637908	+	Missense_Mutation	SNP	G	G	C	.	.	LUAD		TCGA-64-5778-01A-01D-1625-08	TCGA-64-5778-10A-01D-1625-08	G	G	.	.	.	.	.	.	.	.	.	.	.	.	.	.	.	c.136G>C	p.Glu46Gln	p.E46Q	ENST00000482026	1/5	54	39	15	68	68	0	UGT1A3,missense_variant,p.Glu46Gln,ENST00000482026,;UGT1A8,missense_variant,p.Glu46Gln,ENST00000609767,;UGT1A10,intron_variant,,ENST00000373445,;UGT1A4,intron_variant,,ENST00000373409,;UGT1A6,intron_variant,,ENST00000305139,;UGT1A6,intron_variant,,ENST00000373424,;UGT1A8,intron_variant,,ENST00000608381,;UGT1A7,intron_variant,,ENST00000373426,;UGT1A8,intron_variant,,ENST00000609637,;UGT1A5,intron_…	C	ENSG00000243135
UGT1A3	0	.	GRCh37	2	234637790	234637790	+	Missense_Mutation	SNP	G	G	T	.	.	LUAD		TCGA-69-7980-01A-11D-2184-08	TCGA-69-7980-10A-01D-2184-08	G	G	.	.	.	.	.	.	.	.	.	.	.	.	.	.	.	c.18G>T	p.Gln6His	p.Q6H	ENST00000482026	1/5	112	99	12	121	121	0	UGT1A3,missense_variant,p.Gln6His,ENST00000482026,;UGT1A8,missense_variant,p.Gln6His,ENST00000609767,;UGT1A10,intron_variant,,ENST00000373445,;UGT1A4,intron_variant,,ENST00000373409,;UGT1A6,intron_variant,,ENST00000305139,;UGT1A6,intron_variant,,ENST00000373424,;UGT1A8,intron_variant,,ENST00000608381,;UGT1A7,intron_variant,,ENST00000373426,;UGT1A8,intron_variant,,ENST00000609637,;UGT1A5,intron_va…	T	ENSG00000243135
UGT1A3	0	.	GRCh37	2	234638412	234638412	+	Missense_Mutation	SNP	A	A	T	.	.	LUAD		TCGA-78-7536-01A-11D-2063-08	TCGA-78-7536-10A-01D-2063-08	A	A	.	.	.	.	.	.	.	.	.	.	.	.	.	.	.	c.640A>T	p.Met214Leu	p.M214L	ENST00000482026	1/5	204	142	62	257	257	0	UGT1A3,missense_variant,p.Met214Leu,ENST00000482026,;UGT1A8,missense_variant,p.Met214Leu,ENST00000609767,;UGT1A10,intron_variant,,ENST00000373445,;UGT1A4,intron_variant,,ENST00000373409,;UGT1A6,intron_variant,,ENST00000305139,;UGT1A6,intron_variant,,ENST00000373424,;UGT1A8,intron_variant,,ENST00000608381,;UGT1A7,intron_variant,,ENST00000373426,;UGT1A8,intron_variant,,ENST00000609637,;UGT1A5,intro…	T	ENSG00000243135
UGT1A3	0	.	GRCh37	2	234638492	234638492	+	Missense_Mutation	SNP	G	G	C	novel	.	LUAD		TCGA-86-8359-01A-11D-2323-08	TCGA-86-8359-10A-01D-2323-08	G	G	.	.	.	.	.	.	.	.	.	.	.	.	.	.	.	c.720G>C	p.Gln240His	p.Q240H	ENST00000482026	1/5	319	187	131	308	308	0	UGT1A3,missense_variant,p.Gln240His,ENST00000482026,;UGT1A8,missense_variant,p.Gln240His,ENST00000609767,;UGT1A10,intron_variant,,ENST00000373445,;UGT1A4,intron_variant,,ENST00000373409,;UGT1A6,intron_variant,,ENST00000305139,;UGT1A6,intron_variant,,ENST00000373424,;UGT1A8,intron_variant,,ENST00000608381,;UGT1A7,intron_variant,,ENST00000373426,;UGT1A8,intron_variant,,ENST00000609637,;UGT1A5,intro…	C	ENSG00000243135
UGT1A3	0	.	GRCh37	2	234638105	234638105	+	Silent	SNP	C	C	T	novel	.	LUAD		TCGA-J2-A4AD-01A-11D-A24D-08	TCGA-J2-A4AD-10A-01D-A24F-08	C	C	.	.	.	.	.	.	.	.	.	.	.	.	.	.	.	c.333C>T	p.%3D	p.F111F	ENST00000482026	1/5	187	139	48	164	164	0	UGT1A3,synonymous_variant,p.%3D,ENST00000482026,;UGT1A8,synonymous_variant,p.%3D,ENST00000609767,;UGT1A10,intron_variant,,ENST00000373445,;UGT1A4,intron_variant,,ENST00000373409,;UGT1A6,intron_variant,,ENST00000305139,;UGT1A6,intron_variant,,ENST00000373424,;UGT1A8,intron_variant,,ENST00000608381,;UGT1A7,intron_variant,,ENST00000373426,;UGT1A8,intron_variant,,ENST00000609637,;UGT1A5,intron_varian…	T	ENSG00000243135
UGT1A3	0	.	GRCh37	2	234638577	234638577	+	Missense_Mutation	SNP	A	A	G	rs776377482	.	LUSC		TCGA-18-3414-01A-01D-0983-08	TCGA-18-3414-11A-01D-0983-08	A	A	.	.	.	.	.	.	.	.	.	.	.	.	.	.	.	c.805A>G	p.Ile269Val	p.I269V	ENST00000482026	1/5	115	84	31	121	121	0	UGT1A3,missense_variant,p.Ile269Val,ENST00000482026,;UGT1A8,missense_variant,p.Ile269Val,ENST00000609767,;UGT1A10,intron_variant,,ENST00000373445,;UGT1A4,intron_variant,,ENST00000373409,;UGT1A6,intron_variant,,ENST00000305139,;UGT1A6,intron_variant,,ENST00000373424,;UGT1A8,intron_variant,,ENST00000608381,;UGT1A7,intron_variant,,ENST00000373426,;UGT1A8,intron_variant,,ENST00000609637,;UGT1A5,intro…	G	ENSG00000243135
UGT1A3	0	.	GRCh37	2	234638253	234638253	+	Missense_Mutation	SNP	C	C	G	rs776036821	.	LUSC		TCGA-58-A46M-01A-11D-A24D-08	TCGA-58-A46M-10A-01D-A24F-08	C	C	.	.	.	.	.	.	.	.	.	.	.	.	.	.	.	c.481C>G	p.Leu161Val	p.L161V	ENST00000482026	1/5	264	75	188	273	273	0	UGT1A3,missense_variant,p.Leu161Val,ENST00000482026,;UGT1A8,missense_variant,p.Leu161Val,ENST00000609767,;UGT1A10,intron_variant,,ENST00000373445,;UGT1A4,intron_variant,,ENST00000373409,;UGT1A6,intron_variant,,ENST00000305139,;UGT1A6,intron_variant,,ENST00000373424,;UGT1A8,intron_variant,,ENST00000608381,;UGT1A7,intron_variant,,ENST00000373426,;UGT1A8,intron_variant,,ENST00000609637,;UGT1A5,intro…	G	ENSG00000243135
UGT1A3	0	.	GRCh37	2	234638601	234638601	+	Frame_Shift_Del	DEL	G	G	-	novel	.	LUSC		TCGA-98-8022-01A-11D-2244-08	TCGA-98-8022-10A-01D-2244-08	G	G	.	.	.	.	.	.	.	.	.	.	.	.	.	.	.	c.833delG	p.Gly278AlafsTer89	p.G278Afs*89	ENST00000482026	1/5	328	259	69	187	187	0	UGT1A3,frameshift_variant,p.Gly278AlafsTer89,ENST00000482026,;UGT1A8,frameshift_variant,p.Gly278AlafsTer89,ENST00000609767,;UGT1A10,intron_variant,,ENST00000373445,;UGT1A4,intron_variant,,ENST00000373409,;UGT1A6,intron_variant,,ENST00000305139,;UGT1A6,intron_variant,,ENST00000373424,;UGT1A8,intron_variant,,ENST00000608381,;UGT1A7,intron_variant,,ENST00000373426,;UGT1A8,intron_variant,,ENST0000060…	-	ENSG00000243135
UGT1A3	0	.	GRCh37	2	234638544	234638544	+	Nonsense_Mutation	SNP	C	C	T	rs756538337	.	OV		TCGA-04-1367-01A-01W-0492-08	TCGA-04-1367-10A-01W-0492-08	C	C	.	.	.	.	.	.	.	.	.	.	.	.	.	.	.	c.772C>T	p.Arg258Ter	p.R258*	ENST00000482026	1/5	1583	953	630	767	767	0	UGT1A3,stop_gained,p.Arg258Ter,ENST00000482026,;UGT1A8,stop_gained,p.Arg258Ter,ENST00000609767,;UGT1A10,intron_variant,,ENST00000373445,;UGT1A4,intron_variant,,ENST00000373409,;UGT1A6,intron_variant,,ENST00000305139,;UGT1A6,intron_variant,,ENST00000373424,;UGT1A8,intron_variant,,ENST00000608381,;UGT1A7,intron_variant,,ENST00000373426,;UGT1A8,intron_variant,,ENST00000609637,;UGT1A5,intron_variant,…	T	ENSG00000243135
UGT1A3	0	.	GRCh37	2	234638492	234638492	+	Silent	SNP	G	G	A	novel	.	OV		TCGA-13-1494-01A-01W-0545-08	TCGA-13-1494-10A-01W-0545-08	G	G	.	.	.	.	.	.	.	.	.	.	.	.	.	.	.	c.720G>A	p.%3D	p.Q240Q	ENST00000482026	1/5	1039	652	387	1582	1582	0	UGT1A3,synonymous_variant,p.%3D,ENST00000482026,;UGT1A8,synonymous_variant,p.%3D,ENST00000609767,;UGT1A10,intron_variant,,ENST00000373445,;UGT1A4,intron_variant,,ENST00000373409,;UGT1A6,intron_variant,,ENST00000305139,;UGT1A6,intron_variant,,ENST00000373424,;UGT1A8,intron_variant,,ENST00000608381,;UGT1A7,intron_variant,,ENST00000373426,;UGT1A8,intron_variant,,ENST00000609637,;UGT1A5,intron_varian…	A	ENSG00000243135
UGT1A3	0	.	GRCh37	2	234638614	234638614	+	Missense_Mutation	SNP	G	G	C	rs201755757	.	OV		TCGA-24-2267-01A-01W-0799-08	TCGA-24-2267-11A-01W-0799-08	G	G	.	.	.	.	.	.	.	.	.	.	.	.	.	.	.	c.842G>C	p.Cys281Ser	p.C281S	ENST00000482026	1/5	259	185	74	188	188	0	UGT1A3,missense_variant,p.Cys281Ser,ENST00000482026,;UGT1A8,missense_variant,p.Cys281Ser,ENST00000609767,;UGT1A10,intron_variant,,ENST00000373445,;UGT1A4,intron_variant,,ENST00000373409,;UGT1A6,intron_variant,,ENST00000305139,;UGT1A6,intron_variant,,ENST00000373424,;UGT1A8,intron_variant,,ENST00000608381,;UGT1A7,intron_variant,,ENST00000373426,;UGT1A8,intron_variant,,ENST00000609637,;UGT1A5,intro…	C	ENSG00000243135
UGT1A3	0	.	GRCh37	2	234638153	234638153	+	Silent	SNP	T	T	G	novel	.	OV		TCGA-25-1323-01A-01W-0494-09	TCGA-25-1323-10A-01W-0494-09	T	T	.	.	.	.	.	.	.	.	.	.	.	.	.	.	.	c.381T>G	p.%3D	p.S127S	ENST00000482026	1/5	238	189	49	560	560	0	UGT1A3,synonymous_variant,p.%3D,ENST00000482026,;UGT1A8,synonymous_variant,p.%3D,ENST00000609767,;UGT1A10,intron_variant,,ENST00000373445,;UGT1A4,intron_variant,,ENST00000373409,;UGT1A6,intron_variant,,ENST00000305139,;UGT1A6,intron_variant,,ENST00000373424,;UGT1A8,intron_variant,,ENST00000608381,;UGT1A7,intron_variant,,ENST00000373426,;UGT1A8,intron_variant,,ENST00000609637,;UGT1A5,intron_varian…	G	ENSG00000243135
UGT1A3	0	.	GRCh37	2	234638043	234638043	+	Missense_Mutation	SNP	C	C	T	rs762751427	.	SKCM primary		TCGA-EB-A41A-01A-11D-A24R-08	TCGA-EB-A41A-10A-01D-A24R-08	C	C	.	.	.	.	.	.	.	.	.	.	.	.	.	.	.	c.271C>T	p.Arg91Cys	p.R91C	ENST00000482026	1/5	173	106	66	125	125	0	UGT1A3,missense_variant,p.Arg91Cys,ENST00000482026,;UGT1A8,missense_variant,p.Arg91Cys,ENST00000609767,;UGT1A10,intron_variant,,ENST00000373445,;UGT1A4,intron_variant,,ENST00000373409,;UGT1A6,intron_variant,,ENST00000305139,;UGT1A6,intron_variant,,ENST00000373424,;UGT1A8,intron_variant,,ENST00000608381,;UGT1A7,intron_variant,,ENST00000373426,;UGT1A8,intron_variant,,ENST00000609637,;UGT1A5,intron_…	T	ENSG00000243135
UGT1A3	0	.	GRCh37	2	234637795	234637795	+	Missense_Mutation	SNP	C	C	T	novel	.	SKCM primary		TCGA-IH-A3EA-01A-11D-A20D-08	TCGA-IH-A3EA-10A-01D-A20D-08	C	C	.	.	.	.	.	.	.	.	.	.	.	.	.	.	.	c.23C>T	p.Pro8Leu	p.P8L	ENST00000482026	1/5	85	63	22	126	126	0	UGT1A3,missense_variant,p.Pro8Leu,ENST00000482026,;UGT1A8,missense_variant,p.Pro8Leu,ENST00000609767,;UGT1A10,intron_variant,,ENST00000373445,;UGT1A4,intron_variant,,ENST00000373409,;UGT1A6,intron_variant,,ENST00000305139,;UGT1A6,intron_variant,,ENST00000373424,;UGT1A8,intron_variant,,ENST00000608381,;UGT1A7,intron_variant,,ENST00000373426,;UGT1A8,intron_variant,,ENST00000609637,;UGT1A5,intron_va…	T	ENSG00000243135
UGT1A3	0	.	GRCh37	2	234638230	234638230	+	Missense_Mutation	SNP	C	C	T	novel	.	SKCM primary		TCGA-IH-A3EA-01A-11D-A20D-08	TCGA-IH-A3EA-10A-01D-A20D-08	C	C	.	.	.	.	.	.	.	.	.	.	.	.	.	.	.	c.458C>T	p.Pro153Leu	p.P153L	ENST00000482026	1/5	224	161	63	253	253	0	UGT1A3,missense_variant,p.Pro153Leu,ENST00000482026,;UGT1A8,missense_variant,p.Pro153Leu,ENST00000609767,;UGT1A10,intron_variant,,ENST00000373445,;UGT1A4,intron_variant,,ENST00000373409,;UGT1A6,intron_variant,,ENST00000305139,;UGT1A6,intron_variant,,ENST00000373424,;UGT1A8,intron_variant,,ENST00000608381,;UGT1A7,intron_variant,,ENST00000373426,;UGT1A8,intron_variant,,ENST00000609637,;UGT1A5,intro…	T	ENSG00000243135
UGT1A3	0	.	GRCh37	2	234638043	234638043	+	Missense_Mutation	SNP	C	C	T	rs762751427	.	SKCM-Metastatic		TCGA-D3-A3MR-06A-11D-A21A-08	TCGA-D3-A3MR-10A-01D-A21A-08	C	C	.	.	.	.	.	.	.	.	.	.	.	.	.	.	.	c.271C>T	p.Arg91Cys	p.R91C	ENST00000482026	1/5	150	133	16	184	184	0	UGT1A3,missense_variant,p.Arg91Cys,ENST00000482026,;UGT1A8,missense_variant,p.Arg91Cys,ENST00000609767,;UGT1A10,intron_variant,,ENST00000373445,;UGT1A4,intron_variant,,ENST00000373409,;UGT1A6,intron_variant,,ENST00000305139,;UGT1A6,intron_variant,,ENST00000373424,;UGT1A8,intron_variant,,ENST00000608381,;UGT1A7,intron_variant,,ENST00000373426,;UGT1A8,intron_variant,,ENST00000609637,;UGT1A5,intron_…	T	ENSG00000243135
UGT1A3	0	.	GRCh37	2	234637997	234637997	+	Silent	SNP	C	C	T	novel	.	SKCM-Metastatic		TCGA-D3-A5GL-06A-11D-A27K-08	TCGA-D3-A5GL-10A-01D-A27N-08	C	C	.	.	.	.	.	.	.	.	.	.	.	.	.	.	.	c.225C>T	p.%3D	p.F75F	ENST00000482026	1/5	114	72	41	111	111	0	UGT1A3,synonymous_variant,p.%3D,ENST00000482026,;UGT1A8,synonymous_variant,p.%3D,ENST00000609767,;UGT1A10,intron_variant,,ENST00000373445,;UGT1A4,intron_variant,,ENST00000373409,;UGT1A6,intron_variant,,ENST00000305139,;UGT1A6,intron_variant,,ENST00000373424,;UGT1A8,intron_variant,,ENST00000608381,;UGT1A7,intron_variant,,ENST00000373426,;UGT1A8,intron_variant,,ENST00000609637,;UGT1A5,intron_varian…	T	ENSG00000243135
UGT1A3	0	.	GRCh37	2	234638138	234638138	+	Silent	SNP	G	G	A	novel	.	SKCM-Metastatic		TCGA-D3-A8GL-06A-11D-A372-08	TCGA-D3-A8GL-10A-01D-A375-08	G	G	.	.	.	.	.	.	.	.	.	.	.	.	.	.	.	c.366G>A	p.%3D	p.L122L	ENST00000482026	1/5	221	121	99	247	247	0	UGT1A3,synonymous_variant,p.%3D,ENST00000482026,;UGT1A8,synonymous_variant,p.%3D,ENST00000609767,;UGT1A10,intron_variant,,ENST00000373445,;UGT1A4,intron_variant,,ENST00000373409,;UGT1A6,intron_variant,,ENST00000305139,;UGT1A6,intron_variant,,ENST00000373424,;UGT1A8,intron_variant,,ENST00000608381,;UGT1A7,intron_variant,,ENST00000373426,;UGT1A8,intron_variant,,ENST00000609637,;UGT1A5,intron_varian…	A	ENSG00000243135
UGT1A3	0	.	GRCh37	2	234638020	234638020	+	Missense_Mutation	SNP	C	C	T	rs143192251	.	SKCM-Metastatic		TCGA-D9-A6EC-06A-11D-A30X-08	TCGA-D9-A6EC-10A-01D-A30X-08	C	C	.	.	.	.	.	.	.	.	.	.	.	.	.	.	.	c.248C>T	p.Ser83Leu	p.S83L	ENST00000482026	1/5	120	84	36	136	135	1	UGT1A3,missense_variant,p.Ser83Leu,ENST00000482026,;UGT1A8,missense_variant,p.Ser83Leu,ENST00000609767,;UGT1A10,intron_variant,,ENST00000373445,;UGT1A4,intron_variant,,ENST00000373409,;UGT1A6,intron_variant,,ENST00000305139,;UGT1A6,intron_variant,,ENST00000373424,;UGT1A8,intron_variant,,ENST00000608381,;UGT1A7,intron_variant,,ENST00000373426,;UGT1A8,intron_variant,,ENST00000609637,;UGT1A5,intron_…	T	ENSG00000243135
UGT1A3	0	.	GRCh37	2	234637997	234637997	+	Silent	SNP	C	C	T	novel	.	SKCM-Metastatic		TCGA-EE-A17Y-06A-11D-A196-08	TCGA-EE-A17Y-10B-01D-A198-08	C	C	.	.	.	.	.	.	.	.	.	.	.	.	.	.	.	c.225C>T	p.%3D	p.F75F	ENST00000482026	1/5	129	103	26	101	101	0	UGT1A3,synonymous_variant,p.%3D,ENST00000482026,;UGT1A8,synonymous_variant,p.%3D,ENST00000609767,;UGT1A10,intron_variant,,ENST00000373445,;UGT1A4,intron_variant,,ENST00000373409,;UGT1A6,intron_variant,,ENST00000305139,;UGT1A6,intron_variant,,ENST00000373424,;UGT1A8,intron_variant,,ENST00000608381,;UGT1A7,intron_variant,,ENST00000373426,;UGT1A8,intron_variant,,ENST00000609637,;UGT1A5,intron_varian…	T	ENSG00000243135
UGT1A3	0	.	GRCh37	2	234637841	234637841	+	Silent	SNP	G	G	A	novel	.	SKCM-Metastatic		TCGA-EE-A182-06A-11D-A196-08	TCGA-EE-A182-10A-01D-A198-08	G	G	.	.	.	.	.	.	.	.	.	.	.	.	.	.	.	c.69G>A	p.%3D	p.Q23Q	ENST00000482026	1/5	50	31	19	48	48	0	UGT1A3,synonymous_variant,p.%3D,ENST00000482026,;UGT1A8,synonymous_variant,p.%3D,ENST00000609767,;UGT1A10,intron_variant,,ENST00000373445,;UGT1A4,intron_variant,,ENST00000373409,;UGT1A6,intron_variant,,ENST00000305139,;UGT1A6,intron_variant,,ENST00000373424,;UGT1A8,intron_variant,,ENST00000608381,;UGT1A7,intron_variant,,ENST00000373426,;UGT1A8,intron_variant,,ENST00000609637,;UGT1A5,intron_varian…	A	ENSG00000243135
UGT1A3	0	.	GRCh37	2	234638435	234638435	+	Silent	SNP	C	C	T	novel	.	SKCM-Metastatic		TCGA-EE-A29L-06A-12D-A196-08	TCGA-EE-A29L-10A-01D-A198-08	C	C	.	.	.	.	.	.	.	.	.	.	.	.	.	.	.	c.663C>T	p.%3D	p.S221S	ENST00000482026	1/5	257	148	109	185	185	0	UGT1A3,synonymous_variant,p.%3D,ENST00000482026,;UGT1A8,synonymous_variant,p.%3D,ENST00000609767,;UGT1A10,intron_variant,,ENST00000373445,;UGT1A4,intron_variant,,ENST00000373409,;UGT1A6,intron_variant,,ENST00000305139,;UGT1A6,intron_variant,,ENST00000373424,;UGT1A8,intron_variant,,ENST00000608381,;UGT1A7,intron_variant,,ENST00000373426,;UGT1A8,intron_variant,,ENST00000609637,;UGT1A5,intron_varian…	T	ENSG00000243135
UGT1A3	0	.	GRCh37	2	234637957	234637957	+	Missense_Mutation	SNP	C	C	T	rs367893745	.	SKCM-Metastatic		TCGA-EE-A2GC-06A-11D-A197-08	TCGA-EE-A2GC-10A-01D-A199-08	C	C	.	.	.	.	.	.	.	.	.	.	.	.	.	.	.	c.185C>T	p.Thr62Ile	p.T62I	ENST00000482026	1/5	91	70	21	127	127	0	UGT1A3,missense_variant,p.Thr62Ile,ENST00000482026,;UGT1A8,missense_variant,p.Thr62Ile,ENST00000609767,;UGT1A10,intron_variant,,ENST00000373445,;UGT1A4,intron_variant,,ENST00000373409,;UGT1A6,intron_variant,,ENST00000305139,;UGT1A6,intron_variant,,ENST00000373424,;UGT1A8,intron_variant,,ENST00000608381,;UGT1A7,intron_variant,,ENST00000373426,;UGT1A8,intron_variant,,ENST00000609637,;UGT1A5,intron_…	T	ENSG00000243135
UGT1A3	0	.	GRCh37	2	234638206	234638206	+	Missense_Mutation	SNP	C	C	T	novel	.	SKCM-Metastatic		TCGA-EE-A2MC-06A-12D-A197-08	TCGA-EE-A2MC-10A-01D-A199-08	C	C	.	.	.	.	.	.	.	.	.	.	.	.	.	.	.	c.434C>T	p.Ser145Phe	p.S145F	ENST00000482026	1/5	173	149	23	169	169	0	UGT1A3,missense_variant,p.Ser145Phe,ENST00000482026,;UGT1A8,missense_variant,p.Ser145Phe,ENST00000609767,;UGT1A10,intron_variant,,ENST00000373445,;UGT1A4,intron_variant,,ENST00000373409,;UGT1A6,intron_variant,,ENST00000305139,;UGT1A6,intron_variant,,ENST00000373424,;UGT1A8,intron_variant,,ENST00000608381,;UGT1A7,intron_variant,,ENST00000373426,;UGT1A8,intron_variant,,ENST00000609637,;UGT1A5,intro…	T	ENSG00000243135
UGT1A3	0	.	GRCh37	2	234638020	234638020	+	Missense_Mutation	SNP	C	C	T	rs143192251	.	SKCM-Metastatic		TCGA-ER-A19A-06A-21D-A197-08	TCGA-ER-A19A-10A-01D-A199-08	C	C	.	.	.	.	.	.	.	.	.	.	.	.	.	.	.	c.248C>T	p.Ser83Leu	p.S83L	ENST00000482026	1/5	99	90	8	97	97	0	UGT1A3,missense_variant,p.Ser83Leu,ENST00000482026,;UGT1A8,missense_variant,p.Ser83Leu,ENST00000609767,;UGT1A10,intron_variant,,ENST00000373445,;UGT1A4,intron_variant,,ENST00000373409,;UGT1A6,intron_variant,,ENST00000305139,;UGT1A6,intron_variant,,ENST00000373424,;UGT1A8,intron_variant,,ENST00000608381,;UGT1A7,intron_variant,,ENST00000373426,;UGT1A8,intron_variant,,ENST00000609637,;UGT1A5,intron_…	T	ENSG00000243135
UGT1A3	0	.	GRCh37	2	234638323	234638323	+	Missense_Mutation	SNP	G	G	A	novel	.	SKCM-Metastatic		TCGA-ER-A19D-06A-11D-A197-08	TCGA-ER-A19D-10A-01D-A199-08	G	G	.	.	.	.	.	.	.	.	.	.	.	.	.	.	.	c.551G>A	p.Gly184Asp	p.G184D	ENST00000482026	1/5	192	145	46	125	125	0	UGT1A3,missense_variant,p.Gly184Asp,ENST00000482026,;UGT1A8,missense_variant,p.Gly184Asp,ENST00000609767,;UGT1A10,intron_variant,,ENST00000373445,;UGT1A4,intron_variant,,ENST00000373409,;UGT1A6,intron_variant,,ENST00000305139,;UGT1A6,intron_variant,,ENST00000373424,;UGT1A8,intron_variant,,ENST00000608381,;UGT1A7,intron_variant,,ENST00000373426,;UGT1A8,intron_variant,,ENST00000609637,;UGT1A5,intro…	A	ENSG00000243135
UGT1A3	0	.	GRCh37	2	234638207	234638207	+	Silent	SNP	C	C	T	rs760200392	.	SKCM-Metastatic		TCGA-FR-A8YC-06A-11D-A372-08	TCGA-FR-A8YC-10A-01D-A375-08	C	C	.	.	.	.	.	.	.	.	.	.	.	.	.	.	.	c.435C>T	p.%3D	p.S145S	ENST00000482026	1/5	248	162	86	283	283	0	UGT1A3,synonymous_variant,p.%3D,ENST00000482026,;UGT1A8,synonymous_variant,p.%3D,ENST00000609767,;UGT1A10,intron_variant,,ENST00000373445,;UGT1A4,intron_variant,,ENST00000373409,;UGT1A6,intron_variant,,ENST00000305139,;UGT1A6,intron_variant,,ENST00000373424,;UGT1A8,intron_variant,,ENST00000608381,;UGT1A7,intron_variant,,ENST00000373426,;UGT1A8,intron_variant,,ENST00000609637,;UGT1A5,intron_varian…	T	ENSG00000243135
UGT1A3	0	.	GRCh37	2	234638226	234638226	+	Missense_Mutation	SNP	G	G	A	novel	.	SKCM-Metastatic		TCGA-GF-A6C9-06A-11D-A30X-08	TCGA-GF-A6C9-10A-01D-A30X-08	G	G	.	.	.	.	.	.	.	.	.	.	.	.	.	.	.	c.454G>A	p.Asp152Asn	p.D152N	ENST00000482026	1/5	200	187	12	221	220	0	UGT1A3,missense_variant,p.Asp152Asn,ENST00000482026,;UGT1A8,missense_variant,p.Asp152Asn,ENST00000609767,;UGT1A10,intron_variant,,ENST00000373445,;UGT1A4,intron_variant,,ENST00000373409,;UGT1A6,intron_variant,,ENST00000305139,;UGT1A6,intron_variant,,ENST00000373424,;UGT1A8,intron_variant,,ENST00000608381,;UGT1A7,intron_variant,,ENST00000373426,;UGT1A8,intron_variant,,ENST00000609637,;UGT1A5,intro…	A	ENSG00000243135
UGT1A3	0	.	GRCh37	2	234638020	234638020	+	Missense_Mutation	SNP	C	C	T	rs143192251	.	SKCM-Metastatic		TCGA-GN-A4U3-06A-11D-A32N-08	TCGA-GN-A4U3-10F-01D-A32N-08	C	C	.	.	.	.	.	.	.	.	.	.	.	.	.	.	.	c.248C>T	p.Ser83Leu	p.S83L	ENST00000482026	1/5	181	90	90	164	164	0	UGT1A3,missense_variant,p.Ser83Leu,ENST00000482026,;UGT1A8,missense_variant,p.Ser83Leu,ENST00000609767,;UGT1A10,intron_variant,,ENST00000373445,;UGT1A4,intron_variant,,ENST00000373409,;UGT1A6,intron_variant,,ENST00000305139,;UGT1A6,intron_variant,,ENST00000373424,;UGT1A8,intron_variant,,ENST00000608381,;UGT1A7,intron_variant,,ENST00000373426,;UGT1A8,intron_variant,,ENST00000609637,;UGT1A5,intron_…	T	ENSG00000243135
UGT1A3	0	.	GRCh37	2	234638020	234638020	+	Missense_Mutation	SNP	C	C	T	rs143192251	.	SKCM-Metastatic		TCGA-QB-A6FS-06A-11D-A30X-08	TCGA-QB-A6FS-10A-01D-A30X-08	C	C	.	.	.	.	.	.	.	.	.	.	.	.	.	.	.	c.248C>T	p.Ser83Leu	p.S83L	ENST00000482026	1/5	142	113	28	111	111	0	UGT1A3,missense_variant,p.Ser83Leu,ENST00000482026,;UGT1A8,missense_variant,p.Ser83Leu,ENST00000609767,;UGT1A10,intron_variant,,ENST00000373445,;UGT1A4,intron_variant,,ENST00000373409,;UGT1A6,intron_variant,,ENST00000305139,;UGT1A6,intron_variant,,ENST00000373424,;UGT1A8,intron_variant,,ENST00000608381,;UGT1A7,intron_variant,,ENST00000373426,;UGT1A8,intron_variant,,ENST00000609637,;UGT1A5,intron_…	T	ENSG00000243135
UGT1A3	0	.	GRCh37	2	234637960	234637960	+	Missense_Mutation	SNP	C	C	A	rs771299324	.	SKCM-Metastatic		TCGA-W3-AA1R-06A-11D-A397-08	TCGA-W3-AA1R-10A-01D-A39A-08	C	C	.	.	.	.	.	.	.	.	.	.	.	.	.	.	.	c.188C>A	p.Pro63Gln	p.P63Q	ENST00000482026	1/5	88	55	33	82	82	0	UGT1A3,missense_variant,p.Pro63Gln,ENST00000482026,;UGT1A8,missense_variant,p.Pro63Gln,ENST00000609767,;UGT1A10,intron_variant,,ENST00000373445,;UGT1A4,intron_variant,,ENST00000373409,;UGT1A6,intron_variant,,ENST00000305139,;UGT1A6,intron_variant,,ENST00000373424,;UGT1A8,intron_variant,,ENST00000608381,;UGT1A7,intron_variant,,ENST00000373426,;UGT1A8,intron_variant,,ENST00000609637,;UGT1A5,intron_…	A	ENSG00000243135
UGT1A3	0	.	GRCh37	2	234638549	234638549	+	Silent	SNP	G	G	A	novel	.	SKCM-Metastatic		TCGA-W3-AA1R-06A-11D-A397-08	TCGA-W3-AA1R-10A-01D-A39A-08	G	G	.	.	.	.	.	.	.	.	.	.	.	.	.	.	.	c.777G>A	p.%3D	p.G259G	ENST00000482026	1/5	208	121	86	207	207	0	UGT1A3,synonymous_variant,p.%3D,ENST00000482026,;UGT1A8,synonymous_variant,p.%3D,ENST00000609767,;UGT1A10,intron_variant,,ENST00000373445,;UGT1A4,intron_variant,,ENST00000373409,;UGT1A6,intron_variant,,ENST00000305139,;UGT1A6,intron_variant,,ENST00000373424,;UGT1A8,intron_variant,,ENST00000608381,;UGT1A7,intron_variant,,ENST00000373426,;UGT1A8,intron_variant,,ENST00000609637,;UGT1A5,intron_varian…	A	ENSG00000243135
UGT1A3	0	.	GRCh37	2	234638043	234638043	+	Missense_Mutation	SNP	C	C	T	rs762751427	.	SKCM-Metastatic		TCGA-WE-AAA0-06A-11D-A38G-08	TCGA-WE-AAA0-10A-01D-A38J-08	C	C	.	.	.	.	.	.	.	.	.	.	.	.	.	.	.	c.271C>T	p.Arg91Cys	p.R91C	ENST00000482026	1/5	123	84	39	101	100	1	UGT1A3,missense_variant,p.Arg91Cys,ENST00000482026,;UGT1A8,missense_variant,p.Arg91Cys,ENST00000609767,;UGT1A10,intron_variant,,ENST00000373445,;UGT1A4,intron_variant,,ENST00000373409,;UGT1A6,intron_variant,,ENST00000305139,;UGT1A6,intron_variant,,ENST00000373424,;UGT1A8,intron_variant,,ENST00000608381,;UGT1A7,intron_variant,,ENST00000373426,;UGT1A8,intron_variant,,ENST00000609637,;UGT1A5,intron_…	T	ENSG00000243135
UGT1A3	0	.	GRCh37	2	234638079	234638079	+	Missense_Mutation	SNP	A	A	G	.	.	STAD		TCGA-BR-8680-01A-11D-2394-08	TCGA-BR-8680-10A-01D-2394-08	A	A	.	.	.	.	.	.	.	.	.	.	.	.	.	.	.	c.307A>G	p.Thr103Ala	p.T103A	ENST00000482026	1/5	180	117	63	209	209	0	UGT1A3,missense_variant,p.Thr103Ala,ENST00000482026,;UGT1A8,missense_variant,p.Thr103Ala,ENST00000609767,;UGT1A10,intron_variant,,ENST00000373445,;UGT1A4,intron_variant,,ENST00000373409,;UGT1A6,intron_variant,,ENST00000305139,;UGT1A6,intron_variant,,ENST00000373424,;UGT1A8,intron_variant,,ENST00000608381,;UGT1A7,intron_variant,,ENST00000373426,;UGT1A8,intron_variant,,ENST00000609637,;UGT1A5,intro…	G	ENSG00000243135
UGT1A3	0	.	GRCh37	2	234638243	234638243	+	Silent	SNP	C	C	T	rs375083511	.	STAD		TCGA-CD-A4MG-01A-11D-A25D-08	TCGA-CD-A4MG-10A-01D-A25E-08	C	C	.	.	.	.	.	.	.	.	.	.	.	.	.	.	.	c.471C>T	p.%3D	p.C157C	ENST00000482026	1/5	154	64	89	233	233	0	UGT1A3,synonymous_variant,p.%3D,ENST00000482026,;UGT1A8,synonymous_variant,p.%3D,ENST00000609767,;UGT1A10,intron_variant,,ENST00000373445,;UGT1A4,intron_variant,,ENST00000373409,;UGT1A6,intron_variant,,ENST00000305139,;UGT1A6,intron_variant,,ENST00000373424,;UGT1A8,intron_variant,,ENST00000608381,;UGT1A7,intron_variant,,ENST00000373426,;UGT1A8,intron_variant,,ENST00000609637,;UGT1A5,intron_varian…	T	ENSG00000243135
UGT1A3	0	.	GRCh37	2	234638089	234638089	+	Missense_Mutation	SNP	T	T	G	novel	.	STAD		TCGA-VQ-A91D-01A-11D-A410-08	TCGA-VQ-A91D-10A-01D-A413-08	T	T	.	.	.	.	.	.	.	.	.	.	.	.	.	.	.	c.317T>G	p.Phe106Cys	p.F106C	ENST00000482026	1/5	131	83	48	147	147	0	UGT1A3,missense_variant,p.Phe106Cys,ENST00000482026,;UGT1A8,missense_variant,p.Phe106Cys,ENST00000609767,;UGT1A10,intron_variant,,ENST00000373445,;UGT1A4,intron_variant,,ENST00000373409,;UGT1A6,intron_variant,,ENST00000305139,;UGT1A6,intron_variant,,ENST00000373424,;UGT1A8,intron_variant,,ENST00000608381,;UGT1A7,intron_variant,,ENST00000373426,;UGT1A8,intron_variant,,ENST00000609637,;UGT1A5,intro…	G	ENSG00000243135
UGT1A3	0	.	GRCh37	2	234637946	234637946	+	Silent	SNP	A	A	G	rs143500969	.	STAD		TCGA-VQ-AA64-01A-11D-A410-08	TCGA-VQ-AA64-10A-01D-A413-08	A	A	.	.	.	.	.	.	.	.	.	.	.	.	.	.	.	c.174A>G	p.%3D	p.A58A	ENST00000482026	1/5	66	56	10	96	96	0	UGT1A3,synonymous_variant,p.%3D,ENST00000482026,;UGT1A8,synonymous_variant,p.%3D,ENST00000609767,;UGT1A10,intron_variant,,ENST00000373445,;UGT1A4,intron_variant,,ENST00000373409,;UGT1A6,intron_variant,,ENST00000305139,;UGT1A6,intron_variant,,ENST00000373424,;UGT1A8,intron_variant,,ENST00000608381,;UGT1A7,intron_variant,,ENST00000373426,;UGT1A8,intron_variant,,ENST00000609637,;UGT1A5,intron_varian…	G	ENSG00000243135
UGT1A3	0	.	GRCh37	2	234637991	234637991	+	Missense_Mutation	SNP	C	C	A	rs200579886	.	STAD		TCGA-VQ-AA64-01A-11D-A410-08	TCGA-VQ-AA64-10A-01D-A413-08	C	C	.	.	.	.	.	.	.	.	.	.	.	.	.	.	.	c.219C>A	p.Asn73Lys	p.N73K	ENST00000482026	1/5	97	85	11	118	118	0	UGT1A3,missense_variant,p.Asn73Lys,ENST00000482026,;UGT1A8,missense_variant,p.Asn73Lys,ENST00000609767,;UGT1A10,intron_variant,,ENST00000373445,;UGT1A4,intron_variant,,ENST00000373409,;UGT1A6,intron_variant,,ENST00000305139,;UGT1A6,intron_variant,,ENST00000373424,;UGT1A8,intron_variant,,ENST00000608381,;UGT1A7,intron_variant,,ENST00000373426,;UGT1A8,intron_variant,,ENST00000609637,;UGT1A5,intron_…	A	ENSG00000243135
UGT1A3	0	.	GRCh37	2	234638599	234638599	+	Missense_Mutation	SNP	T	T	C	rs371021401	.	THAC		TCGA-EL-A4K0-01A-11D-A257-08	TCGA-EL-A4K0-11A-11D-A25A-08	T	T	.	.	.	.	.	.	.	.	.	.	.	.	.	.	.	c.827T>C	p.Ile276Thr	p.I276T	ENST00000482026	1/5	154	147	7	139	138	1	UGT1A3,missense_variant,p.Ile276Thr,ENST00000482026,;UGT1A8,missense_variant,p.Ile276Thr,ENST00000609767,;UGT1A10,intron_variant,,ENST00000373445,;UGT1A4,intron_variant,,ENST00000373409,;UGT1A6,intron_variant,,ENST00000305139,;UGT1A6,intron_variant,,ENST00000373424,;UGT1A8,intron_variant,,ENST00000608381,;UGT1A7,intron_variant,,ENST00000373426,;UGT1A8,intron_variant,,ENST00000609637,;UGT1A5,intro…	C	ENSG00000243135
UGT1A3	0	.	GRCh37	2	234638168	234638168	+	Silent	SNP	A	A	G	rs146432524	.	UCEC		TCGA-A5-A2K7-01A-11D-A17W-09	TCGA-A5-A2K7-10A-01D-A17W-09	A	A	.	.	.	.	.	.	.	.	.	.	.	.	.	.	.	c.396A>G	p.%3D	p.L132L	ENST00000482026	1/5	58	48	10	84	84	0	UGT1A3,synonymous_variant,p.%3D,ENST00000482026,;UGT1A8,synonymous_variant,p.%3D,ENST00000609767,;UGT1A10,intron_variant,,ENST00000373445,;UGT1A4,intron_variant,,ENST00000373409,;UGT1A6,intron_variant,,ENST00000305139,;UGT1A6,intron_variant,,ENST00000373424,;UGT1A8,intron_variant,,ENST00000608381,;UGT1A7,intron_variant,,ENST00000373426,;UGT1A8,intron_variant,,ENST00000609637,;UGT1A5,intron_varian…	G	ENSG00000243135
UGT1A3	0	.	GRCh37	2	234637992	234637992	+	Frame_Shift_Del	DEL	T	T	-	novel	.	UCEC		TCGA-AP-A054-01A-11W-A062-09	TCGA-AP-A054-10A-01W-A062-09	T	T	.	.	.	.	.	.	.	.	.	.	.	.	.	.	.	c.224delT	p.Phe75SerfsTer3	p.F75Sfs*3	ENST00000482026	1/5	209	181	28	140	140	0	UGT1A3,frameshift_variant,p.Phe75SerfsTer3,ENST00000482026,;UGT1A8,frameshift_variant,p.Phe75SerfsTer3,ENST00000609767,;UGT1A10,intron_variant,,ENST00000373445,;UGT1A4,intron_variant,,ENST00000373409,;UGT1A6,intron_variant,,ENST00000305139,;UGT1A6,intron_variant,,ENST00000373424,;UGT1A8,intron_variant,,ENST00000608381,;UGT1A7,intron_variant,,ENST00000373426,;UGT1A8,intron_variant,,ENST00000609637…	-	ENSG00000243135
UGT1A3	0	.	GRCh37	2	234638288	234638288	+	Silent	SNP	T	T	C	.	.	UCEC		TCGA-AP-A0LD-01A-11W-A062-09	TCGA-AP-A0LD-10A-01W-A062-09	T	T	.	.	.	.	.	.	.	.	.	.	.	.	.	.	.	c.516T>C	p.%3D	p.F172F	ENST00000482026	1/5	430	303	126	481	481	0	UGT1A3,synonymous_variant,p.%3D,ENST00000482026,;UGT1A8,synonymous_variant,p.%3D,ENST00000609767,;UGT1A10,intron_variant,,ENST00000373445,;UGT1A4,intron_variant,,ENST00000373409,;UGT1A6,intron_variant,,ENST00000305139,;UGT1A6,intron_variant,,ENST00000373424,;UGT1A8,intron_variant,,ENST00000608381,;UGT1A7,intron_variant,,ENST00000373426,;UGT1A8,intron_variant,,ENST00000609637,;UGT1A5,intron_varian…	C	ENSG00000243135
UGT1A3	0	.	GRCh37	2	234638058	234638058	+	Missense_Mutation	SNP	C	C	A	novel	.	UCEC		TCGA-AX-A3G4-01A-11D-A20S-09	TCGA-AX-A3G4-10A-01D-A20S-09	C	C	.	.	.	.	.	.	.	.	.	.	.	.	.	.	.	c.286C>A	p.His96Asn	p.H96N	ENST00000482026	1/5	134	124	9	81	81	0	UGT1A3,missense_variant,p.His96Asn,ENST00000482026,;UGT1A8,missense_variant,p.His96Asn,ENST00000609767,;UGT1A10,intron_variant,,ENST00000373445,;UGT1A4,intron_variant,,ENST00000373409,;UGT1A6,intron_variant,,ENST00000305139,;UGT1A6,intron_variant,,ENST00000373424,;UGT1A8,intron_variant,,ENST00000608381,;UGT1A7,intron_variant,,ENST00000373426,;UGT1A8,intron_variant,,ENST00000609637,;UGT1A5,intron_…	A	ENSG00000243135
UGT1A3	0	.	GRCh37	2	234638459	234638459	+	Silent	SNP	T	T	C	.	.	UCEC		TCGA-D1-A17Q-01A-11D-A12J-09	TCGA-D1-A17Q-10A-01D-A12J-09	T	T	.	.	.	.	.	.	.	.	.	.	.	.	.	.	.	c.687T>C	p.%3D	p.A229A	ENST00000482026	1/5	557	296	261	424	424	0	UGT1A3,synonymous_variant,p.%3D,ENST00000482026,;UGT1A8,synonymous_variant,p.%3D,ENST00000609767,;UGT1A10,intron_variant,,ENST00000373445,;UGT1A4,intron_variant,,ENST00000373409,;UGT1A6,intron_variant,,ENST00000305139,;UGT1A6,intron_variant,,ENST00000373424,;UGT1A8,intron_variant,,ENST00000608381,;UGT1A7,intron_variant,,ENST00000373426,;UGT1A8,intron_variant,,ENST00000609637,;UGT1A5,intron_varian…	C	ENSG00000243135
UGT1A3	0	.	GRCh37	2	234637933	234637933	+	Missense_Mutation	SNP	G	G	A	novel	.	UCEC		TCGA-DF-A2KN-01A-11D-A17W-09	TCGA-DF-A2KN-10A-01D-A17W-09	G	G	.	.	.	.	.	.	.	.	.	.	.	.	.	.	.	c.161G>A	p.Arg54Lys	p.R54K	ENST00000482026	1/5	52	44	8	65	65	0	UGT1A3,missense_variant,p.Arg54Lys,ENST00000482026,;UGT1A8,missense_variant,p.Arg54Lys,ENST00000609767,;UGT1A10,intron_variant,,ENST00000373445,;UGT1A4,intron_variant,,ENST00000373409,;UGT1A6,intron_variant,,ENST00000305139,;UGT1A6,intron_variant,,ENST00000373424,;UGT1A8,intron_variant,,ENST00000608381,;UGT1A7,intron_variant,,ENST00000373426,;UGT1A8,intron_variant,,ENST00000609637,;UGT1A5,intron_…	A	ENSG00000243135
UGT1A3	0	.	GRCh37	2	234638044	234638044	+	Missense_Mutation	SNP	G	G	A	rs540607993	.	UCEC		TCGA-DI-A0WH-01A-12D-A12J-09	TCGA-DI-A0WH-10B-01D-A12J-09	G	G	.	.	.	.	.	.	.	.	.	.	.	.	.	.	.	c.272G>A	p.Arg91His	p.R91H	ENST00000482026	1/5	183	114	69	227	227	0	UGT1A3,missense_variant,p.Arg91His,ENST00000482026,;UGT1A8,missense_variant,p.Arg91His,ENST00000609767,;UGT1A10,intron_variant,,ENST00000373445,;UGT1A4,intron_variant,,ENST00000373409,;UGT1A6,intron_variant,,ENST00000305139,;UGT1A6,intron_variant,,ENST00000373424,;UGT1A8,intron_variant,,ENST00000608381,;UGT1A7,intron_variant,,ENST00000373426,;UGT1A8,intron_variant,,ENST00000609637,;UGT1A5,intron_…	A	ENSG00000243135
UGT1A3	0	.	GRCh37	2	234638367	234638367	+	Missense_Mutation	SNP	A	A	T	novel	.	UCEC		TCGA-FI-A2EU-01A-11D-A17D-09	TCGA-FI-A2EU-10A-01D-A17D-09	A	A	.	.	.	.	.	.	.	.	.	.	.	.	.	.	.	c.595A>T	p.Thr199Ser	p.T199S	ENST00000482026	1/5	224	119	104	158	158	0	UGT1A3,missense_variant,p.Thr199Ser,ENST00000482026,;UGT1A8,missense_variant,p.Thr199Ser,ENST00000609767,;UGT1A10,intron_variant,,ENST00000373445,;UGT1A4,intron_variant,,ENST00000373409,;UGT1A6,intron_variant,,ENST00000305139,;UGT1A6,intron_variant,,ENST00000373424,;UGT1A8,intron_variant,,ENST00000608381,;UGT1A7,intron_variant,,ENST00000373426,;UGT1A8,intron_variant,,ENST00000609637,;UGT1A5,intro…	T	ENSG00000243135
UGT1A3	0	.	GRCh37	2	234637988	234637988	+	Missense_Mutation	SNP	G	G	T	rs368262266	.	UCEC		TCGA-QF-A5YS-01A-11D-A31U-09	TCGA-QF-A5YS-10A-01D-A31U-09	G	G	.	.	.	.	.	.	.	.	.	.	.	.	.	.	.	c.216G>T	p.Glu72Asp	p.E72D	ENST00000482026	1/5	73	41	32	79	79	0	UGT1A3,missense_variant,p.Glu72Asp,ENST00000482026,;UGT1A8,missense_variant,p.Glu72Asp,ENST00000609767,;UGT1A10,intron_variant,,ENST00000373445,;UGT1A4,intron_variant,,ENST00000373409,;UGT1A6,intron_variant,,ENST00000305139,;UGT1A6,intron_variant,,ENST00000373424,;UGT1A8,intron_variant,,ENST00000608381,;UGT1A7,intron_variant,,ENST00000373426,;UGT1A8,intron_variant,,ENST00000609637,;UGT1A5,intron_…	T	ENSG00000243135
UGT1A3	0	.	GRCh37	2	234638408	234638408	+	Missense_Mutation	SNP	G	G	T	novel	.	UCEC		TCGA-QS-A5YQ-01A-11D-A31U-09	TCGA-QS-A5YQ-10A-01D-A31U-09	G	G	.	.	.	.	.	.	.	.	.	.	.	.	.	.	.	c.636G>T	p.Lys212Asn	p.K212N	ENST00000482026	1/5	110	68	41	156	156	0	UGT1A3,missense_variant,p.Lys212Asn,ENST00000482026,;UGT1A8,missense_variant,p.Lys212Asn,ENST00000609767,;UGT1A10,intron_variant,,ENST00000373445,;UGT1A4,intron_variant,,ENST00000373409,;UGT1A6,intron_variant,,ENST00000305139,;UGT1A6,intron_variant,,ENST00000373424,;UGT1A8,intron_variant,,ENST00000608381,;UGT1A7,intron_variant,,ENST00000373426,;UGT1A8,intron_variant,,ENST00000609637,;UGT1A5,intro…	T	ENSG00000243135
UGT1A4	0	.	GRCh37	2	234628118	234628118	+	Missense_Mutation	SNP	C	C	G	.	.	BLCA		TCGA-E7-A541-01A-11D-A26M-08	TCGA-E7-A541-10A-01D-A26K-08	C	C	.	.	.	.	.	.	.	.	.	.	.	.	.	.	.	c.652C>G	p.Leu218Val	p.L218V	ENST00000373409	1/5	95	90	5	130	130	0	UGT1A4,missense_variant,p.Leu218Val,ENST00000373409,;UGT1A10,intron_variant,,ENST00000373445,;UGT1A6,intron_variant,,ENST00000305139,;UGT1A6,intron_variant,,ENST00000373424,;UGT1A8,intron_variant,,ENST00000608381,;UGT1A7,intron_variant,,ENST00000373426,;UGT1A8,intron_variant,,ENST00000609637,;UGT1A5,intron_variant,,ENST00000373414,;UGT1A6,intron_variant,,ENST00000406651,;UGT1A10,intron_variant,,E…	G	ENSG00000244474
UGT1A4	0	.	GRCh37	2	234680956	234680956	+	Silent	SNP	G	G	A	rs368860136	.	BLCA		TCGA-KQ-A41Q-01A-11D-A339-08	TCGA-KQ-A41Q-10D-01D-A339-08	G	G	.	.	.	.	.	.	.	.	.	.	.	.	.	.	.	c.1356G>A	p.%3D	p.P452P	ENST00000373409	5/5	67	55	11	61	61	0	UGT1A4,synonymous_variant,p.%3D,ENST00000373409,;UGT1A6,synonymous_variant,p.%3D,ENST00000305139,;UGT1A3,synonymous_variant,p.%3D,ENST00000482026,;UGT1A6,synonymous_variant,p.%3D,ENST00000373424,;UGT1A8,synonymous_variant,p.%3D,ENST00000608383,;UGT1A8,synonymous_variant,p.%3D,ENST00000608381,;UGT1A7,synonymous_variant,p.%3D,ENST00000373426,;UGT1A8,synonymous_variant,p.%3D,ENST00000609637,;UGT1A8,…	A	ENSG00000244474
UGT1A4	0	.	GRCh37	2	234628108	234628108	+	Missense_Mutation	SNP	G	G	T	novel	.	BLCA		TCGA-YC-A89H-01A-11D-A364-08	TCGA-YC-A89H-10A-01D-A362-08	G	G	.	.	.	.	.	.	.	.	.	.	.	.	.	.	.	c.642G>T	p.Met214Ile	p.M214I	ENST00000373409	1/5	157	104	52	184	184	0	UGT1A4,missense_variant,p.Met214Ile,ENST00000373409,;UGT1A10,intron_variant,,ENST00000373445,;UGT1A6,intron_variant,,ENST00000305139,;UGT1A6,intron_variant,,ENST00000373424,;UGT1A8,intron_variant,,ENST00000608381,;UGT1A7,intron_variant,,ENST00000373426,;UGT1A8,intron_variant,,ENST00000609637,;UGT1A5,intron_variant,,ENST00000373414,;UGT1A6,intron_variant,,ENST00000406651,;UGT1A10,intron_variant,,E…	T	ENSG00000244474
UGT1A4	0	.	GRCh37	2	234681046	234681046	+	Silent	SNP	C	C	T	.	.	BRCA		TCGA-A2-A0CR-01A-11D-A228-09	TCGA-A2-A0CR-10A-01D-A22A-09	C	C	.	.	.	.	.	.	.	.	.	.	.	.	.	.	.	c.1446C>T	p.%3D	p.L482L	ENST00000373409	5/5	37	31	5	39	39	0	UGT1A4,synonymous_variant,p.%3D,ENST00000373409,;UGT1A6,synonymous_variant,p.%3D,ENST00000305139,;UGT1A3,synonymous_variant,p.%3D,ENST00000482026,;UGT1A6,synonymous_variant,p.%3D,ENST00000373424,;UGT1A8,synonymous_variant,p.%3D,ENST00000608383,;UGT1A8,synonymous_variant,p.%3D,ENST00000608381,;UGT1A7,synonymous_variant,p.%3D,ENST00000373426,;UGT1A8,synonymous_variant,p.%3D,ENST00000609637,;UGT1A8,…	T	ENSG00000244474
UGT1A4	0	.	GRCh37	2	234627740	234627740	+	Missense_Mutation	SNP	G	G	A	rs376370143	.	BRCA		TCGA-A2-A0CX-01A-21W-A019-09	TCGA-A2-A0CX-10A-01W-A021-09	G	G	.	.	.	.	.	.	.	.	.	.	.	.	.	.	.	c.274G>A	p.Val92Ile	p.V92I	ENST00000373409	1/5	168	131	36	179	179	0	UGT1A4,missense_variant,p.Val92Ile,ENST00000373409,;UGT1A10,intron_variant,,ENST00000373445,;UGT1A6,intron_variant,,ENST00000305139,;UGT1A6,intron_variant,,ENST00000373424,;UGT1A8,intron_variant,,ENST00000608381,;UGT1A7,intron_variant,,ENST00000373426,;UGT1A8,intron_variant,,ENST00000609637,;UGT1A5,intron_variant,,ENST00000373414,;UGT1A6,intron_variant,,ENST00000406651,;UGT1A10,intron_variant,,EN…	A	ENSG00000244474
UGT1A4	0	.	GRCh37	2	234681067	234681067	+	Silent	SNP	C	C	A	.	.	BRCA		TCGA-A8-A09Z-01A-11W-A019-09	TCGA-A8-A09Z-10A-01W-A021-09	C	C	.	.	.	.	.	.	.	.	.	.	.	.	.	.	.	c.1467C>A	p.%3D	p.S489S	ENST00000373409	5/5	137	84	53	124	124	0	UGT1A4,synonymous_variant,p.%3D,ENST00000373409,;UGT1A6,synonymous_variant,p.%3D,ENST00000305139,;UGT1A3,synonymous_variant,p.%3D,ENST00000482026,;UGT1A6,synonymous_variant,p.%3D,ENST00000373424,;UGT1A8,synonymous_variant,p.%3D,ENST00000608383,;UGT1A8,synonymous_variant,p.%3D,ENST00000608381,;UGT1A7,synonymous_variant,p.%3D,ENST00000373426,;UGT1A8,synonymous_variant,p.%3D,ENST00000609637,;UGT1A8,…	A	ENSG00000244474
UGT1A4	0	.	GRCh37	2	234681283	234681283	+	3'UTR	SNP	A	A	C	novel	.	BRCA		TCGA-AN-A046-01A-21W-A050-09	TCGA-AN-A046-10A-01W-A055-09	A	A	.	.	.	.	.	.	.	.	.	.	.	.	.	.	.	c.*78A>C	.	.	ENST00000373409	5/5	37	26	11	47	47	0	UGT1A4,3_prime_UTR_variant,,ENST00000373409,;UGT1A6,3_prime_UTR_variant,,ENST00000305139,;UGT1A3,3_prime_UTR_variant,,ENST00000482026,;UGT1A6,3_prime_UTR_variant,,ENST00000373424,;UGT1A8,3_prime_UTR_variant,,ENST00000608381,;UGT1A7,3_prime_UTR_variant,,ENST00000373426,;UGT1A8,3_prime_UTR_variant,,ENST00000609637,;UGT1A8,3_prime_UTR_variant,,ENST00000609767,;UGT1A5,3_prime_UTR_variant,,ENST0000037…	C	ENSG00000244474
UGT1A4	0	.	GRCh37	2	234627956	234627956	+	Missense_Mutation	SNP	T	T	C	.	.	BRCA		TCGA-AR-A256-01A-11D-A167-09	TCGA-AR-A256-10A-01D-A167-09	T	T	.	.	.	.	.	.	.	.	.	.	.	.	.	.	.	c.490T>C	p.Tyr164His	p.Y164H	ENST00000373409	1/5	139	17	122	95	95	0	UGT1A4,missense_variant,p.Tyr164His,ENST00000373409,;UGT1A10,intron_variant,,ENST00000373445,;UGT1A6,intron_variant,,ENST00000305139,;UGT1A6,intron_variant,,ENST00000373424,;UGT1A8,intron_variant,,ENST00000608381,;UGT1A7,intron_variant,,ENST00000373426,;UGT1A8,intron_variant,,ENST00000609637,;UGT1A5,intron_variant,,ENST00000373414,;UGT1A6,intron_variant,,ENST00000406651,;UGT1A10,intron_variant,,E…	C	ENSG00000244474
UGT1A4	0	.	GRCh37	2	234681079	234681079	+	Silent	SNP	T	T	C	.	.	BRCA		TCGA-BH-A18G-01A-11D-A12B-09	TCGA-BH-A18G-10A-01D-A12B-09	T	T	.	.	.	.	.	.	.	.	.	.	.	.	.	.	.	c.1479T>C	p.%3D	p.I493I	ENST00000373409	5/5	381	238	143	393	393	0	UGT1A4,synonymous_variant,p.%3D,ENST00000373409,;UGT1A6,synonymous_variant,p.%3D,ENST00000305139,;UGT1A3,synonymous_variant,p.%3D,ENST00000482026,;UGT1A6,synonymous_variant,p.%3D,ENST00000373424,;UGT1A8,synonymous_variant,p.%3D,ENST00000608383,;UGT1A8,synonymous_variant,p.%3D,ENST00000608381,;UGT1A7,synonymous_variant,p.%3D,ENST00000373426,;UGT1A8,synonymous_variant,p.%3D,ENST00000609637,;UGT1A8,…	C	ENSG00000244474
UGT1A4	0	.	GRCh37	2	234680926	234680926	+	Missense_Mutation	SNP	G	G	A	.	.	BRCA		TCGA-D8-A146-01A-31D-A10Y-09	TCGA-D8-A146-10A-01D-A110-09	G	G	.	.	.	.	.	.	.	.	.	.	.	.	.	.	.	c.1326G>A	p.Met442Ile	p.M442I	ENST00000373409	5/5	114	94	20	79	79	0	UGT1A4,missense_variant,p.Met442Ile,ENST00000373409,;UGT1A6,missense_variant,p.Met440Ile,ENST00000305139,;UGT1A3,missense_variant,p.Met442Ile,ENST00000482026,;UGT1A6,missense_variant,p.Met173Ile,ENST00000373424,;UGT1A8,missense_variant,p.Met441Ile,ENST00000608383,;UGT1A8,missense_variant,p.Met442Ile,ENST00000608381,;UGT1A7,missense_variant,p.Met438Ile,ENST00000373426,;UGT1A8,missense_variant,p.Me…	A	ENSG00000244474
UGT1A4	0	.	GRCh37	2	234680995	234680995	+	Silent	SNP	T	T	C	rs757417206	.	BRCA		TCGA-D8-A1X6-01A-11D-A14K-09	TCGA-D8-A1X6-10A-01D-A14K-09	T	T	.	.	.	.	.	.	.	.	.	.	.	.	.	.	.	c.1395T>C	p.%3D	p.F465F	ENST00000373409	5/5	91	46	44	24	24	0	UGT1A4,synonymous_variant,p.%3D,ENST00000373409,;UGT1A6,synonymous_variant,p.%3D,ENST00000305139,;UGT1A3,synonymous_variant,p.%3D,ENST00000482026,;UGT1A6,synonymous_variant,p.%3D,ENST00000373424,;UGT1A8,synonymous_variant,p.%3D,ENST00000608383,;UGT1A8,synonymous_variant,p.%3D,ENST00000608381,;UGT1A7,synonymous_variant,p.%3D,ENST00000373426,;UGT1A8,synonymous_variant,p.%3D,ENST00000609637,;UGT1A8,…	C	ENSG00000244474
UGT1A4	0	.	GRCh37	2	234681161	234681161	+	Frame_Shift_Del	DEL	A	A	-	rs553499095	.	BRCA		TCGA-D8-A1XK-01A-21D-A14K-09	TCGA-D8-A1XK-10A-01D-A14K-09	A	A	.	.	.	.	.	.	.	.	.	.	.	.	.	.	.	c.1566delA	p.Arg524GlufsTer22	p.R524Efs*22	ENST00000373409	5/5	99	89	10	91	91	0	UGT1A4,frameshift_variant,p.Arg524GlufsTer22,ENST00000373409,;UGT1A6,frameshift_variant,p.Arg522GlufsTer22,ENST00000305139,;UGT1A3,frameshift_variant,p.Arg524GlufsTer22,ENST00000482026,;UGT1A6,frameshift_variant,p.Arg255GlufsTer22,ENST00000373424,;UGT1A8,frameshift_variant,p.Arg523GlufsTer?,ENST00000608383,;UGT1A8,frameshift_variant,p.Arg524GlufsTer22,ENST00000608381,;UGT1A7,frameshift_variant,p.…	-	ENSG00000244474
UGT1A4	0	.	GRCh37	2	234628179	234628179	+	Frame_Shift_Del	DEL	T	T	-	novel	.	BRCA		TCGA-D8-A27V-01A-12D-A17D-09	TCGA-D8-A27V-10A-01D-A17D-09	T	T	.	.	.	.	.	.	.	.	.	.	.	.	.	.	.	c.717delT	p.Gln240ArgfsTer23	p.Q240Rfs*23	ENST00000373409	1/5	223	204	19	106	106	0	UGT1A4,frameshift_variant,p.Gln240ArgfsTer23,ENST00000373409,;UGT1A10,intron_variant,,ENST00000373445,;UGT1A6,intron_variant,,ENST00000305139,;UGT1A6,intron_variant,,ENST00000373424,;UGT1A8,intron_variant,,ENST00000608381,;UGT1A7,intron_variant,,ENST00000373426,;UGT1A8,intron_variant,,ENST00000609637,;UGT1A5,intron_variant,,ENST00000373414,;UGT1A6,intron_variant,,ENST00000406651,;UGT1A10,intron_v…	-	ENSG00000244474
UGT1A4	0	.	GRCh37	2	234681013	234681013	+	Silent	SNP	C	C	T	rs769720139	.	BRCA		TCGA-E2-A109-01A-11D-A10M-09	TCGA-E2-A109-10A-01D-A10M-09	C	C	.	.	.	.	.	.	.	.	.	.	.	.	.	.	.	c.1413C>T	p.%3D	p.G471G	ENST00000373409	5/5	292	154	138	207	207	0	UGT1A4,synonymous_variant,p.%3D,ENST00000373409,;UGT1A6,synonymous_variant,p.%3D,ENST00000305139,;UGT1A3,synonymous_variant,p.%3D,ENST00000482026,;UGT1A6,synonymous_variant,p.%3D,ENST00000373424,;UGT1A8,synonymous_variant,p.%3D,ENST00000608383,;UGT1A8,synonymous_variant,p.%3D,ENST00000608381,;UGT1A7,synonymous_variant,p.%3D,ENST00000373426,;UGT1A8,synonymous_variant,p.%3D,ENST00000609637,;UGT1A8,…	T	ENSG00000244474
UGT1A4	0	.	GRCh37	2	234681279	234681279	+	3'UTR	SNP	T	T	A	novel	.	BRCA		TCGA-E9-A1RF-01A-11D-A159-09	TCGA-E9-A1RF-10A-01D-A159-09	T	T	.	.	.	.	.	.	.	.	.	.	.	.	.	.	.	c.*74T>A	.	.	ENST00000373409	5/5	21	18	3	36	36	0	UGT1A4,3_prime_UTR_variant,,ENST00000373409,;UGT1A6,3_prime_UTR_variant,,ENST00000305139,;UGT1A3,3_prime_UTR_variant,,ENST00000482026,;UGT1A6,3_prime_UTR_variant,,ENST00000373424,;UGT1A8,3_prime_UTR_variant,,ENST00000608381,;UGT1A7,3_prime_UTR_variant,,ENST00000373426,;UGT1A8,3_prime_UTR_variant,,ENST00000609637,;UGT1A8,3_prime_UTR_variant,,ENST00000609767,;UGT1A5,3_prime_UTR_variant,,ENST0000037…	A	ENSG00000244474
UGT1A4	0	.	GRCh37	2	234628184	234628184	+	Missense_Mutation	SNP	C	C	G	novel	.	CESC		TCGA-C5-A1BI-01B-11D-A13W-08	TCGA-C5-A1BI-10A-01D-A13W-08	C	C	.	.	.	.	.	.	.	.	.	.	.	.	.	.	.	c.718C>G	p.Gln240Glu	p.Q240E	ENST00000373409	1/5	261	225	36	350	349	0	UGT1A4,missense_variant,p.Gln240Glu,ENST00000373409,;UGT1A10,intron_variant,,ENST00000373445,;UGT1A6,intron_variant,,ENST00000305139,;UGT1A6,intron_variant,,ENST00000373424,;UGT1A8,intron_variant,,ENST00000608381,;UGT1A7,intron_variant,,ENST00000373426,;UGT1A8,intron_variant,,ENST00000609637,;UGT1A5,intron_variant,,ENST00000373414,;UGT1A6,intron_variant,,ENST00000406651,;UGT1A10,intron_variant,,E…	G	ENSG00000244474
UGT1A4	0	.	GRCh37	2	234681161	234681161	+	Frame_Shift_Del	DEL	A	A	-	rs553499095	.	COAD		TCGA-AA-3663-01A-01D-1719-10	TCGA-AA-3663-11A-01D-1719-10	A	A	.	.	.	.	.	.	.	.	.	.	.	.	.	.	.	c.1566delA	p.Arg524GlufsTer22	p.R524Efs*22	ENST00000373409	5/5	279	186	93	102	102	0	UGT1A4,frameshift_variant,p.Arg524GlufsTer22,ENST00000373409,;UGT1A6,frameshift_variant,p.Arg522GlufsTer22,ENST00000305139,;UGT1A3,frameshift_variant,p.Arg524GlufsTer22,ENST00000482026,;UGT1A6,frameshift_variant,p.Arg255GlufsTer22,ENST00000373424,;UGT1A8,frameshift_variant,p.Arg523GlufsTer?,ENST00000608383,;UGT1A8,frameshift_variant,p.Arg524GlufsTer22,ENST00000608381,;UGT1A7,frameshift_variant,p.…	-	ENSG00000244474
UGT1A4	0	.	GRCh37	2	234627442	234627442	+	5'UTR	SNP	T	T	C	novel	.	COAD		TCGA-AA-3672-01A-01W-0900-09	TCGA-AA-3672-10A-01W-0900-09	T	T	.	.	.	.	.	.	.	.	.	.	.	.	.	.	.	c.-25T>C	.	.	ENST00000373409	1/5	49	32	17	65	65	0	UGT1A4,5_prime_UTR_variant,,ENST00000373409,;UGT1A10,intron_variant,,ENST00000373445,;UGT1A6,intron_variant,,ENST00000305139,;UGT1A6,intron_variant,,ENST00000373424,;UGT1A8,intron_variant,,ENST00000608381,;UGT1A7,intron_variant,,ENST00000373426,;UGT1A8,intron_variant,,ENST00000609637,;UGT1A5,intron_variant,,ENST00000373414,;UGT1A6,intron_variant,,ENST00000406651,;UGT1A10,intron_variant,,ENST00000…	C	ENSG00000244474
UGT1A4	0	.	GRCh37	2	234628118	234628118	+	Missense_Mutation	SNP	C	C	G	.	.	COAD		TCGA-AA-3712-01A-21D-1719-10	TCGA-AA-3712-11A-01D-1719-10	C	C	.	.	.	.	.	.	.	.	.	.	.	.	.	.	.	c.652C>G	p.Leu218Val	p.L218V	ENST00000373409	1/5	363	283	79	167	167	0	UGT1A4,missense_variant,p.Leu218Val,ENST00000373409,;UGT1A10,intron_variant,,ENST00000373445,;UGT1A6,intron_variant,,ENST00000305139,;UGT1A6,intron_variant,,ENST00000373424,;UGT1A8,intron_variant,,ENST00000608381,;UGT1A7,intron_variant,,ENST00000373426,;UGT1A8,intron_variant,,ENST00000609637,;UGT1A5,intron_variant,,ENST00000373414,;UGT1A6,intron_variant,,ENST00000406651,;UGT1A10,intron_variant,,E…	G	ENSG00000244474
UGT1A4	0	.	GRCh37	2	234680980	234680980	+	Silent	SNP	G	G	A	novel	.	COAD		TCGA-AA-3952-01A-01W-0995-10	TCGA-AA-3952-10A-01W-0995-10	G	G	.	.	.	.	.	.	.	.	.	.	.	.	.	.	.	c.1380G>A	p.%3D	p.V460V	ENST00000373409	5/5	72	65	6	113	113	0	UGT1A4,synonymous_variant,p.%3D,ENST00000373409,;UGT1A6,synonymous_variant,p.%3D,ENST00000305139,;UGT1A3,synonymous_variant,p.%3D,ENST00000482026,;UGT1A6,synonymous_variant,p.%3D,ENST00000373424,;UGT1A8,synonymous_variant,p.%3D,ENST00000608383,;UGT1A8,synonymous_variant,p.%3D,ENST00000608381,;UGT1A7,synonymous_variant,p.%3D,ENST00000373426,;UGT1A8,synonymous_variant,p.%3D,ENST00000609637,;UGT1A8,…	A	ENSG00000244474
UGT1A4	0	.	GRCh37	2	234628080	234628080	+	Missense_Mutation	SNP	T	T	C	.	.	COAD		TCGA-AA-3989-01A-01W-0995-10	TCGA-AA-3989-10A-01W-0999-10	T	T	.	.	.	.	.	.	.	.	.	.	.	.	.	.	.	c.614T>C	p.Met205Thr	p.M205T	ENST00000373409	1/5	126	91	35	133	132	1	UGT1A4,missense_variant,p.Met205Thr,ENST00000373409,;UGT1A10,intron_variant,,ENST00000373445,;UGT1A6,intron_variant,,ENST00000305139,;UGT1A6,intron_variant,,ENST00000373424,;UGT1A8,intron_variant,,ENST00000608381,;UGT1A7,intron_variant,,ENST00000373426,;UGT1A8,intron_variant,,ENST00000609637,;UGT1A5,intron_variant,,ENST00000373414,;UGT1A6,intron_variant,,ENST00000406651,;UGT1A10,intron_variant,,E…	C	ENSG00000244474
UGT1A4	0	.	GRCh37	2	234680928	234680928	+	Missense_Mutation	SNP	G	G	A	rs748166510	.	COAD		TCGA-AZ-6598-01A-11D-1771-10	TCGA-AZ-6598-11A-01D-1771-10	G	G	.	.	.	.	.	.	.	.	.	.	.	.	.	.	.	c.1328G>A	p.Arg443His	p.R443H	ENST00000373409	5/5	129	109	20	92	92	0	UGT1A4,missense_variant,p.Arg443His,ENST00000373409,;UGT1A6,missense_variant,p.Arg441His,ENST00000305139,;UGT1A3,missense_variant,p.Arg443His,ENST00000482026,;UGT1A6,missense_variant,p.Arg174His,ENST00000373424,;UGT1A8,missense_variant,p.Arg442His,ENST00000608383,;UGT1A8,missense_variant,p.Arg443His,ENST00000608381,;UGT1A7,missense_variant,p.Arg439His,ENST00000373426,;UGT1A8,missense_variant,p.Ar…	A	ENSG00000244474
UGT1A4	0	.	GRCh37	2	234681074	234681074	+	Missense_Mutation	SNP	G	G	A	rs747543462	.	COAD		TCGA-AZ-6601-01A-11D-1771-10	TCGA-AZ-6601-11A-01D-1771-10	G	G	.	.	.	.	.	.	.	.	.	.	.	.	.	.	.	c.1474G>A	p.Val492Met	p.V492M	ENST00000373409	5/5	284	222	61	218	218	0	UGT1A4,missense_variant,p.Val492Met,ENST00000373409,;UGT1A6,missense_variant,p.Val490Met,ENST00000305139,;UGT1A3,missense_variant,p.Val492Met,ENST00000482026,;UGT1A6,missense_variant,p.Val223Met,ENST00000373424,;UGT1A8,missense_variant,p.Val491Met,ENST00000608383,;UGT1A8,missense_variant,p.Val492Met,ENST00000608381,;UGT1A7,missense_variant,p.Val488Met,ENST00000373426,;UGT1A8,missense_variant,p.Va…	A	ENSG00000244474
UGT1A4	0	.	GRCh37	2	234627977	234627977	+	Frame_Shift_Del	DEL	T	T	-	rs780658532	.	COAD		TCGA-CK-6746-01A-11D-1835-10	TCGA-CK-6746-10A-01D-1835-10	T	T	.	.	.	.	.	.	.	.	.	.	.	.	.	.	.	c.517delT	p.Trp173GlyfsTer8	p.W173Gfs*8	ENST00000373409	1/5	261	181	80	209	209	0	UGT1A4,frameshift_variant,p.Trp173GlyfsTer8,ENST00000373409,;UGT1A10,intron_variant,,ENST00000373445,;UGT1A6,intron_variant,,ENST00000305139,;UGT1A6,intron_variant,,ENST00000373424,;UGT1A8,intron_variant,,ENST00000608381,;UGT1A7,intron_variant,,ENST00000373426,;UGT1A8,intron_variant,,ENST00000609637,;UGT1A5,intron_variant,,ENST00000373414,;UGT1A6,intron_variant,,ENST00000406651,;UGT1A10,intron_va…	-	ENSG00000244474
UGT1A4	0	.	GRCh37	2	234627573	234627573	+	Missense_Mutation	SNP	C	C	T	rs149779946	.	COAD		TCGA-D5-6530-01A-11D-1719-10	TCGA-D5-6530-10A-01D-1719-10	C	C	.	.	.	.	.	.	.	.	.	.	.	.	.	.	.	c.107C>T	p.Thr36Ile	p.T36I	ENST00000373409	1/5	358	218	139	28	28	0	UGT1A4,missense_variant,p.Thr36Ile,ENST00000373409,;UGT1A10,intron_variant,,ENST00000373445,;UGT1A6,intron_variant,,ENST00000305139,;UGT1A6,intron_variant,,ENST00000373424,;UGT1A8,intron_variant,,ENST00000608381,;UGT1A7,intron_variant,,ENST00000373426,;UGT1A8,intron_variant,,ENST00000609637,;UGT1A5,intron_variant,,ENST00000373414,;UGT1A6,intron_variant,,ENST00000406651,;UGT1A10,intron_variant,,EN…	T	ENSG00000244474
UGT1A4	0	.	GRCh37	2	234627926	234627926	+	Missense_Mutation	SNP	G	G	A	rs762367100	.	COAD		TCGA-D5-6927-01A-21D-1924-10	TCGA-D5-6927-10A-01D-1924-10	G	G	.	.	.	.	.	.	.	.	.	.	.	.	.	.	.	c.460G>A	p.Val154Ile	p.V154I	ENST00000373409	1/5	294	211	83	185	185	0	UGT1A4,missense_variant,p.Val154Ile,ENST00000373409,;UGT1A10,intron_variant,,ENST00000373445,;UGT1A6,intron_variant,,ENST00000305139,;UGT1A6,intron_variant,,ENST00000373424,;UGT1A8,intron_variant,,ENST00000608381,;UGT1A7,intron_variant,,ENST00000373426,;UGT1A8,intron_variant,,ENST00000609637,;UGT1A5,intron_variant,,ENST00000373414,;UGT1A6,intron_variant,,ENST00000406651,;UGT1A10,intron_variant,,E…	A	ENSG00000244474
UGT1A4	0	.	GRCh37	2	234681161	234681161	+	Frame_Shift_Del	DEL	A	A	-	rs553499095	.	COAD		TCGA-G4-6628-01A-11D-1835-10	TCGA-G4-6628-10A-01D-1835-10	A	A	.	.	.	.	.	.	.	.	.	.	.	.	.	.	.	c.1566delA	p.Arg524GlufsTer22	p.R524Efs*22	ENST00000373409	5/5	122	106	16	72	72	0	UGT1A4,frameshift_variant,p.Arg524GlufsTer22,ENST00000373409,;UGT1A6,frameshift_variant,p.Arg522GlufsTer22,ENST00000305139,;UGT1A3,frameshift_variant,p.Arg524GlufsTer22,ENST00000482026,;UGT1A6,frameshift_variant,p.Arg255GlufsTer22,ENST00000373424,;UGT1A8,frameshift_variant,p.Arg523GlufsTer?,ENST00000608383,;UGT1A8,frameshift_variant,p.Arg524GlufsTer22,ENST00000608381,;UGT1A7,frameshift_variant,p.…	-	ENSG00000244474
UGT1A4	0	.	GRCh37	2	234681161	234681161	+	Frame_Shift_Del	DEL	A	A	-	rs553499095	.	COAD		TCGA-WS-AB45-01A-11D-A40P-10	TCGA-WS-AB45-10A-01D-A40P-10	A	A	.	.	.	.	.	.	.	.	.	.	.	.	.	.	.	c.1566delA	p.Arg524GlufsTer22	p.R524Efs*22	ENST00000373409	5/5	114	103	10	122	121	0	UGT1A4,frameshift_variant,p.Arg524GlufsTer22,ENST00000373409,;UGT1A6,frameshift_variant,p.Arg522GlufsTer22,ENST00000305139,;UGT1A3,frameshift_variant,p.Arg524GlufsTer22,ENST00000482026,;UGT1A6,frameshift_variant,p.Arg255GlufsTer22,ENST00000373424,;UGT1A8,frameshift_variant,p.Arg523GlufsTer?,ENST00000608383,;UGT1A8,frameshift_variant,p.Arg524GlufsTer22,ENST00000608381,;UGT1A7,frameshift_variant,p.…	-	ENSG00000244474
UGT1A4	0	.	GRCh37	2	234627801	234627801	+	Missense_Mutation	SNP	G	G	C	novel	.	ESCA		TCGA-2H-A9GH-01A-11D-A37C-09	TCGA-2H-A9GH-11A-11D-A37F-09	G	G	.	.	.	.	.	.	.	.	.	.	.	.	.	.	.	c.335G>C	p.Arg112Thr	p.R112T	ENST00000373409	1/5	46	37	8	53	53	0	UGT1A4,missense_variant,p.Arg112Thr,ENST00000373409,;UGT1A10,intron_variant,,ENST00000373445,;UGT1A6,intron_variant,,ENST00000305139,;UGT1A6,intron_variant,,ENST00000373424,;UGT1A8,intron_variant,,ENST00000608381,;UGT1A7,intron_variant,,ENST00000373426,;UGT1A8,intron_variant,,ENST00000609637,;UGT1A5,intron_variant,,ENST00000373414,;UGT1A6,intron_variant,,ENST00000406651,;UGT1A10,intron_variant,,E…	C	ENSG00000244474
UGT1A4	0	.	GRCh37	2	234628062	234628062	+	Missense_Mutation	SNP	C	C	T	rs538242607	.	ESCA		TCGA-R6-A6L6-01B-11D-A33E-09	TCGA-R6-A6L6-10A-01D-A33H-09	C	C	.	.	.	.	.	.	.	.	.	.	.	.	.	.	.	c.596C>T	p.Thr199Met	p.T199M	ENST00000373409	1/5	109	86	22	113	113	0	UGT1A4,missense_variant,p.Thr199Met,ENST00000373409,;UGT1A10,intron_variant,,ENST00000373445,;UGT1A6,intron_variant,,ENST00000305139,;UGT1A6,intron_variant,,ENST00000373424,;UGT1A8,intron_variant,,ENST00000608381,;UGT1A7,intron_variant,,ENST00000373426,;UGT1A8,intron_variant,,ENST00000609637,;UGT1A5,intron_variant,,ENST00000373414,;UGT1A6,intron_variant,,ENST00000406651,;UGT1A10,intron_variant,,E…	T	ENSG00000244474
UGT1A4	0	.	GRCh37	2	234680978	234680978	+	Missense_Mutation	SNP	G	G	A	novel	.	GBM		TCGA-12-0819-01A-01W-0424-08	TCGA-12-0819-10A-01W-0424-08	G	G	.	.	.	.	.	.	.	.	.	.	.	.	.	.	.	c.1378G>A	p.Val460Met	p.V460M	ENST00000373409	5/5	327	201	126	296	296	0	UGT1A4,missense_variant,p.Val460Met,ENST00000373409,;UGT1A6,missense_variant,p.Val458Met,ENST00000305139,;UGT1A3,missense_variant,p.Val460Met,ENST00000482026,;UGT1A6,missense_variant,p.Val191Met,ENST00000373424,;UGT1A8,missense_variant,p.Val459Met,ENST00000608383,;UGT1A8,missense_variant,p.Val460Met,ENST00000608381,;UGT1A7,missense_variant,p.Val456Met,ENST00000373426,;UGT1A8,missense_variant,p.Va…	A	ENSG00000244474
UGT1A4	0	.	GRCh37	2	234627963	234627963	+	Nonsense_Mutation	SNP	C	C	A	rs149079663	.	GBM		TCGA-26-1799-01A-02W-0643-08	TCGA-26-1799-10A-01W-0643-08	C	C	.	.	.	.	.	.	.	.	.	.	.	.	.	.	.	c.497C>A	p.Ser166Ter	p.S166*	ENST00000373409	1/5	263	251	12	381	381	0	UGT1A4,stop_gained,p.Ser166Ter,ENST00000373409,;UGT1A10,intron_variant,,ENST00000373445,;UGT1A6,intron_variant,,ENST00000305139,;UGT1A6,intron_variant,,ENST00000373424,;UGT1A8,intron_variant,,ENST00000608381,;UGT1A7,intron_variant,,ENST00000373426,;UGT1A8,intron_variant,,ENST00000609637,;UGT1A5,intron_variant,,ENST00000373414,;UGT1A6,intron_variant,,ENST00000406651,;UGT1A10,intron_variant,,ENST00…	A	ENSG00000244474
UGT1A4	0	.	GRCh37	2	234681031	234681031	+	Silent	SNP	C	C	T	rs28900406	.	GBM		TCGA-41-5651-01A-01D-1696-08	TCGA-41-5651-10A-01D-1696-08	C	C	.	.	.	.	.	.	.	.	.	.	.	.	.	.	.	c.1431C>T	p.%3D	p.P477P	ENST00000373409	5/5	92	56	36	139	139	0	UGT1A4,synonymous_variant,p.%3D,ENST00000373409,;UGT1A6,synonymous_variant,p.%3D,ENST00000305139,;UGT1A3,synonymous_variant,p.%3D,ENST00000482026,;UGT1A6,synonymous_variant,p.%3D,ENST00000373424,;UGT1A8,synonymous_variant,p.%3D,ENST00000608383,;UGT1A8,synonymous_variant,p.%3D,ENST00000608381,;UGT1A7,synonymous_variant,p.%3D,ENST00000373426,;UGT1A8,synonymous_variant,p.%3D,ENST00000609637,;UGT1A8,…	T	ENSG00000244474
UGT1A4	0	.	GRCh37	2	234628246	234628246	+	Silent	SNP	C	C	T	.	.	GBM		TCGA-74-6575-01A-11D-1845-08	TCGA-74-6575-10A-01D-1845-08	C	C	.	.	.	.	.	.	.	.	.	.	.	.	.	.	.	c.780C>T	p.%3D	p.D260D	ENST00000373409	1/5	324	232	92	347	347	0	UGT1A4,synonymous_variant,p.%3D,ENST00000373409,;UGT1A10,intron_variant,,ENST00000373445,;UGT1A6,intron_variant,,ENST00000305139,;UGT1A6,intron_variant,,ENST00000373424,;UGT1A8,intron_variant,,ENST00000608381,;UGT1A7,intron_variant,,ENST00000373426,;UGT1A8,intron_variant,,ENST00000609637,;UGT1A5,intron_variant,,ENST00000373414,;UGT1A6,intron_variant,,ENST00000406651,;UGT1A10,intron_variant,,ENST0…	T	ENSG00000244474
UGT1A4	0	.	GRCh37	2	234627538	234627538	+	Silent	SNP	C	C	G	rs775726544	.	HNSC		TCGA-CN-6020-01A-11D-1683-08	TCGA-CN-6020-10A-01D-1683-08	C	C	.	.	.	.	.	.	.	.	.	.	.	.	.	.	.	c.72C>G	p.%3D	p.P24P	ENST00000373409	1/5	69	59	9	72	72	0	UGT1A4,synonymous_variant,p.%3D,ENST00000373409,;UGT1A10,intron_variant,,ENST00000373445,;UGT1A6,intron_variant,,ENST00000305139,;UGT1A6,intron_variant,,ENST00000373424,;UGT1A8,intron_variant,,ENST00000608381,;UGT1A7,intron_variant,,ENST00000373426,;UGT1A8,intron_variant,,ENST00000609637,;UGT1A5,intron_variant,,ENST00000373414,;UGT1A6,intron_variant,,ENST00000406651,;UGT1A10,intron_variant,,ENST0…	G	ENSG00000244474
UGT1A4	0	.	GRCh37	2	234680964	234680964	+	Missense_Mutation	SNP	C	C	T	rs762488947	.	HNSC		TCGA-CN-6995-01A-31D-2012-08	TCGA-CN-6995-10A-01D-2013-08	C	C	.	.	.	.	.	.	.	.	.	.	.	.	.	.	.	c.1364C>T	p.Pro455Leu	p.P455L	ENST00000373409	5/5	101	86	15	74	74	0	UGT1A4,missense_variant,p.Pro455Leu,ENST00000373409,;UGT1A6,missense_variant,p.Pro453Leu,ENST00000305139,;UGT1A3,missense_variant,p.Pro455Leu,ENST00000482026,;UGT1A6,missense_variant,p.Pro186Leu,ENST00000373424,;UGT1A8,missense_variant,p.Pro454Leu,ENST00000608383,;UGT1A8,missense_variant,p.Pro455Leu,ENST00000608381,;UGT1A7,missense_variant,p.Pro451Leu,ENST00000373426,;UGT1A8,missense_variant,p.Pr…	T	ENSG00000244474
UGT1A4	0	.	GRCh37	2	234627556	234627556	+	Missense_Mutation	SNP	G	G	T	rs760663679	.	HNSC		TCGA-CN-A63U-01A-11D-A30E-08	TCGA-CN-A63U-10A-01D-A30H-08	G	G	.	.	.	.	.	.	.	.	.	.	.	.	.	.	.	c.90G>T	p.Lys30Asn	p.K30N	ENST00000373409	1/5	70	52	18	96	96	0	UGT1A4,missense_variant,p.Lys30Asn,ENST00000373409,;UGT1A10,intron_variant,,ENST00000373445,;UGT1A6,intron_variant,,ENST00000305139,;UGT1A6,intron_variant,,ENST00000373424,;UGT1A8,intron_variant,,ENST00000608381,;UGT1A7,intron_variant,,ENST00000373426,;UGT1A8,intron_variant,,ENST00000609637,;UGT1A5,intron_variant,,ENST00000373414,;UGT1A6,intron_variant,,ENST00000406651,;UGT1A10,intron_variant,,EN…	T	ENSG00000244474
UGT1A4	0	.	GRCh37	2	234628224	234628224	+	Missense_Mutation	SNP	C	C	G	novel	.	HNSC		TCGA-CQ-A4CD-01A-21D-A25D-08	TCGA-CQ-A4CD-10A-01D-A25E-08	C	C	.	.	.	.	.	.	.	.	.	.	.	.	.	.	.	c.758C>G	p.Ser253Cys	p.S253C	ENST00000373409	1/5	200	155	45	225	225	0	UGT1A4,missense_variant,p.Ser253Cys,ENST00000373409,;UGT1A10,intron_variant,,ENST00000373445,;UGT1A6,intron_variant,,ENST00000305139,;UGT1A6,intron_variant,,ENST00000373424,;UGT1A8,intron_variant,,ENST00000608381,;UGT1A7,intron_variant,,ENST00000373426,;UGT1A8,intron_variant,,ENST00000609637,;UGT1A5,intron_variant,,ENST00000373414,;UGT1A6,intron_variant,,ENST00000406651,;UGT1A10,intron_variant,,E…	G	ENSG00000244474
UGT1A4	0	.	GRCh37	2	234681074	234681074	+	Missense_Mutation	SNP	G	G	A	rs747543462	.	HNSC		TCGA-CV-A45V-01A-21D-A25D-08	TCGA-CV-A45V-10A-01D-A25E-08	G	G	.	.	.	.	.	.	.	.	.	.	.	.	.	.	.	c.1474G>A	p.Val492Met	p.V492M	ENST00000373409	5/5	110	80	29	119	119	0	UGT1A4,missense_variant,p.Val492Met,ENST00000373409,;UGT1A6,missense_variant,p.Val490Met,ENST00000305139,;UGT1A3,missense_variant,p.Val492Met,ENST00000482026,;UGT1A6,missense_variant,p.Val223Met,ENST00000373424,;UGT1A8,missense_variant,p.Val491Met,ENST00000608383,;UGT1A8,missense_variant,p.Val492Met,ENST00000608381,;UGT1A7,missense_variant,p.Val488Met,ENST00000373426,;UGT1A8,missense_variant,p.Va…	A	ENSG00000244474
UGT1A4	0	.	GRCh37	2	234681122	234681122	+	Missense_Mutation	SNP	T	T	C	novel	.	HNSC		TCGA-CV-A463-01A-11D-A25Y-08	TCGA-CV-A463-10A-01D-A25Y-08	T	T	.	.	.	.	.	.	.	.	.	.	.	.	.	.	.	c.1522T>C	p.Phe508Leu	p.F508L	ENST00000373409	5/5	86	56	30	101	101	0	UGT1A4,missense_variant,p.Phe508Leu,ENST00000373409,;UGT1A6,missense_variant,p.Phe506Leu,ENST00000305139,;UGT1A3,missense_variant,p.Phe508Leu,ENST00000482026,;UGT1A6,missense_variant,p.Phe239Leu,ENST00000373424,;UGT1A8,missense_variant,p.Phe507Leu,ENST00000608383,;UGT1A8,missense_variant,p.Phe508Leu,ENST00000608381,;UGT1A7,missense_variant,p.Phe504Leu,ENST00000373426,;UGT1A8,missense_variant,p.Ph…	C	ENSG00000244474
UGT1A4	0	.	GRCh37	2	234627964	234627964	+	Silent	SNP	G	G	A	rs368511777	.	HNSC		TCGA-QK-AA3J-01A-11D-A391-08	TCGA-QK-AA3J-10A-01D-A394-08	G	G	.	.	.	.	.	.	.	.	.	.	.	.	.	.	.	c.498G>A	p.%3D	p.S166S	ENST00000373409	1/5	270	168	101	272	272	0	UGT1A4,synonymous_variant,p.%3D,ENST00000373409,;UGT1A10,intron_variant,,ENST00000373445,;UGT1A6,intron_variant,,ENST00000305139,;UGT1A6,intron_variant,,ENST00000373424,;UGT1A8,intron_variant,,ENST00000608381,;UGT1A7,intron_variant,,ENST00000373426,;UGT1A8,intron_variant,,ENST00000609637,;UGT1A5,intron_variant,,ENST00000373414,;UGT1A6,intron_variant,,ENST00000406651,;UGT1A10,intron_variant,,ENST0…	A	ENSG00000244474
UGT1A4	0	.	GRCh37	2	234628268	234628268	+	Missense_Mutation	SNP	C	C	A	.	.	KIRC		TCGA-CJ-5683-01A-11D-1534-10	TCGA-CJ-5683-11A-01D-1535-10	C	C	.	.	.	.	.	.	.	.	.	.	.	.	.	.	.	c.802C>A	p.Pro268Thr	p.P268T	ENST00000373409	1/5	230	148	82	139	138	1	UGT1A4,missense_variant,p.Pro268Thr,ENST00000373409,;UGT1A10,intron_variant,,ENST00000373445,;UGT1A6,intron_variant,,ENST00000305139,;UGT1A6,intron_variant,,ENST00000373424,;UGT1A8,intron_variant,,ENST00000608381,;UGT1A7,intron_variant,,ENST00000373426,;UGT1A8,intron_variant,,ENST00000609637,;UGT1A5,intron_variant,,ENST00000373414,;UGT1A6,intron_variant,,ENST00000406651,;UGT1A10,intron_variant,,E…	A	ENSG00000244474
UGT1A4	0	.	GRCh37	2	234627516	234627516	+	Missense_Mutation	SNP	T	T	C	.	.	KIRC		TCGA-CZ-5982-01A-11D-1669-08	TCGA-CZ-5982-11A-01D-1669-08	T	T	.	.	.	.	.	.	.	.	.	.	.	.	.	.	.	c.50T>C	p.Leu17Pro	p.L17P	ENST00000373409	1/5	81	51	29	87	87	0	UGT1A4,missense_variant,p.Leu17Pro,ENST00000373409,;UGT1A10,intron_variant,,ENST00000373445,;UGT1A6,intron_variant,,ENST00000305139,;UGT1A6,intron_variant,,ENST00000373424,;UGT1A8,intron_variant,,ENST00000608381,;UGT1A7,intron_variant,,ENST00000373426,;UGT1A8,intron_variant,,ENST00000609637,;UGT1A5,intron_variant,,ENST00000373414,;UGT1A6,intron_variant,,ENST00000406651,;UGT1A10,intron_variant,,EN…	C	ENSG00000244474
UGT1A4	0	.	GRCh37	2	234627924	234627924	+	Missense_Mutation	SNP	C	C	G	rs769049134	.	KIRP		TCGA-SX-A71W-01A-12D-A34Z-10	TCGA-SX-A71W-10A-01D-A34Z-10	C	C	.	.	.	.	.	.	.	.	.	.	.	.	.	.	.	c.458C>G	p.Pro153Arg	p.P153R	ENST00000373409	1/5	162	106	55	287	287	0	UGT1A4,missense_variant,p.Pro153Arg,ENST00000373409,;UGT1A10,intron_variant,,ENST00000373445,;UGT1A6,intron_variant,,ENST00000305139,;UGT1A6,intron_variant,,ENST00000373424,;UGT1A8,intron_variant,,ENST00000608381,;UGT1A7,intron_variant,,ENST00000373426,;UGT1A8,intron_variant,,ENST00000609637,;UGT1A5,intron_variant,,ENST00000373414,;UGT1A6,intron_variant,,ENST00000406651,;UGT1A10,intron_variant,,E…	G	ENSG00000244474
UGT1A4	0	.	GRCh37	2	234627498	234627498	+	Missense_Mutation	SNP	G	G	A	rs149314940	.	LGG		TCGA-HT-7860-01A-11D-2395-08	TCGA-HT-7860-10A-01D-2396-08	G	G	.	.	.	.	.	.	.	.	.	.	.	.	.	.	.	c.32G>A	p.Arg11Gln	p.R11Q	ENST00000373409	1/5	87	64	23	78	78	0	UGT1A4,missense_variant,p.Arg11Gln,ENST00000373409,;UGT1A10,intron_variant,,ENST00000373445,;UGT1A6,intron_variant,,ENST00000305139,;UGT1A6,intron_variant,,ENST00000373424,;UGT1A8,intron_variant,,ENST00000608381,;UGT1A7,intron_variant,,ENST00000373426,;UGT1A8,intron_variant,,ENST00000609637,;UGT1A5,intron_variant,,ENST00000373414,;UGT1A6,intron_variant,,ENST00000406651,;UGT1A10,intron_variant,,EN…	A	ENSG00000244474
UGT1A4	0	.	GRCh37	2	234681067	234681087	+	In_Frame_Del	DEL	CTTGGACGTGATTGGTTTCCT	CTTGGACGTGATTGGTTTCCT	-	novel	.	LIHC		TCGA-2Y-A9HA-01A-11D-A38X-10	TCGA-2Y-A9HA-10A-01D-A38X-10	CTTGGACGTGATTGGTTTCCT	CTTGGACGTGATTGGTTTCCT	.	.	.	.	.	.	.	.	.	.	.	.	.	.	.	c.1472_1492delACGTGATTGGTTTCCTCTTGG	p.Asp491_Leu497del	p.D491_L497del	ENST00000373409	5/5	136	124	12	151	151	0	UGT1A4,inframe_deletion,p.Asp491_Leu497del,ENST00000373409,;UGT1A6,inframe_deletion,p.Asp489_Leu495del,ENST00000305139,;UGT1A3,inframe_deletion,p.Asp491_Leu497del,ENST00000482026,;UGT1A6,inframe_deletion,p.Asp222_Leu228del,ENST00000373424,;UGT1A8,inframe_deletion,p.Asp490_Leu496del,ENST00000608383,;UGT1A8,inframe_deletion,p.Asp491_Leu497del,ENST00000608381,;UGT1A7,inframe_deletion,p.Asp487_Leu493…	-	ENSG00000244474
UGT1A4	0	.	GRCh37	2	234681251	234681251	+	3'UTR	SNP	A	A	G	novel	.	LIHC		TCGA-BC-4073-01B-02D-A12Z-10	TCGA-BC-4073-10A-01D-A12Z-10	A	A	.	.	.	.	.	.	.	.	.	.	.	.	.	.	.	c.*46A>G	.	.	ENST00000373409	5/5	51	36	14	42	42	0	UGT1A4,3_prime_UTR_variant,,ENST00000373409,;UGT1A6,3_prime_UTR_variant,,ENST00000305139,;UGT1A3,3_prime_UTR_variant,,ENST00000482026,;UGT1A6,3_prime_UTR_variant,,ENST00000373424,;UGT1A8,3_prime_UTR_variant,,ENST00000608381,;UGT1A7,3_prime_UTR_variant,,ENST00000373426,;UGT1A8,3_prime_UTR_variant,,ENST00000609637,;UGT1A8,3_prime_UTR_variant,,ENST00000609767,;UGT1A5,3_prime_UTR_variant,,ENST0000037…	G	ENSG00000244474
UGT1A4	0	.	GRCh37	2	234628158	234628158	+	Missense_Mutation	SNP	A	A	G	rs754670633	.	LIHC		TCGA-FV-A496-01A-11D-A25V-10	TCGA-FV-A496-10A-01D-A25V-10	A	A	.	.	.	.	.	.	.	.	.	.	.	.	.	.	.	c.692A>G	p.Tyr231Cys	p.Y231C	ENST00000373409	1/5	275	197	77	269	269	0	UGT1A4,missense_variant,p.Tyr231Cys,ENST00000373409,;UGT1A10,intron_variant,,ENST00000373445,;UGT1A6,intron_variant,,ENST00000305139,;UGT1A6,intron_variant,,ENST00000373424,;UGT1A8,intron_variant,,ENST00000608381,;UGT1A7,intron_variant,,ENST00000373426,;UGT1A8,intron_variant,,ENST00000609637,;UGT1A5,intron_variant,,ENST00000373414,;UGT1A6,intron_variant,,ENST00000406651,;UGT1A10,intron_variant,,E…	G	ENSG00000244474
UGT1A4	0	.	GRCh37	2	234681206	234681206	+	3'UTR	SNP	G	G	C	rs773424672	.	LIHC		TCGA-UB-A7MB-01A-11D-A33Q-10	TCGA-UB-A7MB-10A-01D-A33Q-10	G	G	.	.	.	.	.	.	.	.	.	.	.	.	.	.	.	c.*1G>C	.	.	ENST00000373409	5/5	37	23	13	67	67	0	UGT1A4,3_prime_UTR_variant,,ENST00000373409,;UGT1A6,3_prime_UTR_variant,,ENST00000305139,;UGT1A3,3_prime_UTR_variant,,ENST00000482026,;UGT1A6,3_prime_UTR_variant,,ENST00000373424,;UGT1A8,3_prime_UTR_variant,,ENST00000608381,;UGT1A7,3_prime_UTR_variant,,ENST00000373426,;UGT1A8,3_prime_UTR_variant,,ENST00000609637,;UGT1A8,3_prime_UTR_variant,,ENST00000609767,;UGT1A5,3_prime_UTR_variant,,ENST0000037…	C	ENSG00000244474
UGT1A4	0	.	GRCh37	2	234627526	234627526	+	Silent	SNP	C	C	T	.	.	LUAD		TCGA-05-4398-01A-01D-1265-08	TCGA-05-4398-10A-01D-1265-08	C	C	.	.	.	.	.	.	.	.	.	.	.	.	.	.	.	c.60C>T	p.%3D	p.L20L	ENST00000373409	1/5	52	44	8	71	71	0	UGT1A4,synonymous_variant,p.%3D,ENST00000373409,;UGT1A10,intron_variant,,ENST00000373445,;UGT1A6,intron_variant,,ENST00000305139,;UGT1A6,intron_variant,,ENST00000373424,;UGT1A8,intron_variant,,ENST00000608381,;UGT1A7,intron_variant,,ENST00000373426,;UGT1A8,intron_variant,,ENST00000609637,;UGT1A5,intron_variant,,ENST00000373414,;UGT1A6,intron_variant,,ENST00000406651,;UGT1A10,intron_variant,,ENST0…	T	ENSG00000244474
UGT1A4	0	.	GRCh37	2	234681013	234681013	+	Silent	SNP	C	C	G	rs769720139	.	LUAD		TCGA-44-6777-01A-11D-1855-08	TCGA-44-6777-10A-01D-1855-08	C	C	.	.	.	.	.	.	.	.	.	.	.	.	.	.	.	c.1413C>G	p.%3D	p.G471G	ENST00000373409	5/5	137	126	10	156	156	0	UGT1A4,synonymous_variant,p.%3D,ENST00000373409,;UGT1A6,synonymous_variant,p.%3D,ENST00000305139,;UGT1A3,synonymous_variant,p.%3D,ENST00000482026,;UGT1A6,synonymous_variant,p.%3D,ENST00000373424,;UGT1A8,synonymous_variant,p.%3D,ENST00000608383,;UGT1A8,synonymous_variant,p.%3D,ENST00000608381,;UGT1A7,synonymous_variant,p.%3D,ENST00000373426,;UGT1A8,synonymous_variant,p.%3D,ENST00000609637,;UGT1A8,…	G	ENSG00000244474
UGT1A4	0	.	GRCh37	2	234628144	234628144	+	Silent	SNP	T	T	G	novel	.	LUAD		TCGA-49-AARN-01A-21D-A410-08	TCGA-49-AARN-11A-11D-A413-08	T	T	.	.	.	.	.	.	.	.	.	.	.	.	.	.	.	c.678T>G	p.%3D	p.T226T	ENST00000373409	1/5	195	185	10	142	142	0	UGT1A4,synonymous_variant,p.%3D,ENST00000373409,;UGT1A10,intron_variant,,ENST00000373445,;UGT1A6,intron_variant,,ENST00000305139,;UGT1A6,intron_variant,,ENST00000373424,;UGT1A8,intron_variant,,ENST00000608381,;UGT1A7,intron_variant,,ENST00000373426,;UGT1A8,intron_variant,,ENST00000609637,;UGT1A5,intron_variant,,ENST00000373414,;UGT1A6,intron_variant,,ENST00000406651,;UGT1A10,intron_variant,,ENST0…	G	ENSG00000244474
UGT1A4	0	.	GRCh37	2	234627778	234627778	+	Silent	SNP	A	A	G	rs373602050	.	LUAD		TCGA-55-7576-01A-11D-2063-08	TCGA-55-7576-10A-01D-2063-08	A	A	.	.	.	.	.	.	.	.	.	.	.	.	.	.	.	c.312A>G	p.%3D	p.E104E	ENST00000373409	1/5	235	128	107	155	155	0	UGT1A4,synonymous_variant,p.%3D,ENST00000373409,;UGT1A10,intron_variant,,ENST00000373445,;UGT1A6,intron_variant,,ENST00000305139,;UGT1A6,intron_variant,,ENST00000373424,;UGT1A8,intron_variant,,ENST00000608381,;UGT1A7,intron_variant,,ENST00000373426,;UGT1A8,intron_variant,,ENST00000609637,;UGT1A5,intron_variant,,ENST00000373414,;UGT1A6,intron_variant,,ENST00000406651,;UGT1A10,intron_variant,,ENST0…	G	ENSG00000244474
UGT1A4	0	.	GRCh37	2	234681091	234681091	+	Missense_Mutation	SNP	G	G	C	novel	.	LUAD		TCGA-55-A48X-01A-11D-A24D-08	TCGA-55-A48X-10A-01D-A24F-08	G	G	.	.	.	.	.	.	.	.	.	.	.	.	.	.	.	c.1491G>C	p.Leu497Phe	p.L497F	ENST00000373409	5/5	125	110	14	133	133	0	UGT1A4,missense_variant,p.Leu497Phe,ENST00000373409,;UGT1A6,missense_variant,p.Leu495Phe,ENST00000305139,;UGT1A3,missense_variant,p.Leu497Phe,ENST00000482026,;UGT1A6,missense_variant,p.Leu228Phe,ENST00000373424,;UGT1A8,missense_variant,p.Leu496Phe,ENST00000608383,;UGT1A8,missense_variant,p.Leu497Phe,ENST00000608381,;UGT1A7,missense_variant,p.Leu493Phe,ENST00000373426,;UGT1A8,missense_variant,p.Le…	C	ENSG00000244474
UGT1A4	0	.	GRCh37	2	234628155	234628155	+	Missense_Mutation	SNP	C	C	T	rs372293131	.	LUAD		TCGA-64-1679-01A-21D-2063-08	TCGA-64-1679-10A-01D-2063-08	C	C	.	.	.	.	.	.	.	.	.	.	.	.	.	.	.	c.689C>T	p.Pro230Leu	p.P230L	ENST00000373409	1/5	250	203	47	260	259	0	UGT1A4,missense_variant,p.Pro230Leu,ENST00000373409,;UGT1A10,intron_variant,,ENST00000373445,;UGT1A6,intron_variant,,ENST00000305139,;UGT1A6,intron_variant,,ENST00000373424,;UGT1A8,intron_variant,,ENST00000608381,;UGT1A7,intron_variant,,ENST00000373426,;UGT1A8,intron_variant,,ENST00000609637,;UGT1A5,intron_variant,,ENST00000373414,;UGT1A6,intron_variant,,ENST00000406651,;UGT1A10,intron_variant,,E…	T	ENSG00000244474
UGT1A4	0	.	GRCh37	2	234627534	234627534	+	Missense_Mutation	SNP	A	A	T	novel	.	LUAD		TCGA-73-A9RS-01A-11D-A410-08	TCGA-73-A9RS-10A-01D-A413-08	A	A	.	.	.	.	.	.	.	.	.	.	.	.	.	.	.	c.68A>T	p.Gln23Leu	p.Q23L	ENST00000373409	1/5	37	27	9	48	48	0	UGT1A4,missense_variant,p.Gln23Leu,ENST00000373409,;UGT1A10,intron_variant,,ENST00000373445,;UGT1A6,intron_variant,,ENST00000305139,;UGT1A6,intron_variant,,ENST00000373424,;UGT1A8,intron_variant,,ENST00000608381,;UGT1A7,intron_variant,,ENST00000373426,;UGT1A8,intron_variant,,ENST00000609637,;UGT1A5,intron_variant,,ENST00000373414,;UGT1A6,intron_variant,,ENST00000406651,;UGT1A10,intron_variant,,EN…	T	ENSG00000244474
UGT1A4	0	.	GRCh37	2	234628226	234628226	+	Missense_Mutation	SNP	G	G	C	rs369777528	.	LUAD		TCGA-78-8640-01A-11D-2393-08	TCGA-78-8640-11A-01D-2393-08	G	G	.	.	.	.	.	.	.	.	.	.	.	.	.	.	.	c.760G>C	p.Val254Leu	p.V254L	ENST00000373409	1/5	350	318	31	296	296	0	UGT1A4,missense_variant,p.Val254Leu,ENST00000373409,;UGT1A10,intron_variant,,ENST00000373445,;UGT1A6,intron_variant,,ENST00000305139,;UGT1A6,intron_variant,,ENST00000373424,;UGT1A8,intron_variant,,ENST00000608381,;UGT1A7,intron_variant,,ENST00000373426,;UGT1A8,intron_variant,,ENST00000609637,;UGT1A5,intron_variant,,ENST00000373414,;UGT1A6,intron_variant,,ENST00000406651,;UGT1A10,intron_variant,,E…	C	ENSG00000244474
UGT1A4	0	.	GRCh37	2	234628319	234628319	+	Nonsense_Mutation	SNP	A	A	T	rs770674662	.	LUAD		TCGA-86-8073-01A-11D-2238-08	TCGA-86-8073-10A-01D-2238-08	A	A	.	.	.	.	.	.	.	.	.	.	.	.	.	.	.	c.853A>T	p.Lys285Ter	p.K285*	ENST00000373409	1/5	223	193	30	264	264	0	UGT1A4,stop_gained,p.Lys285Ter,ENST00000373409,;UGT1A10,intron_variant,,ENST00000373445,;UGT1A6,intron_variant,,ENST00000305139,;UGT1A6,intron_variant,,ENST00000373424,;UGT1A8,intron_variant,,ENST00000608381,;UGT1A7,intron_variant,,ENST00000373426,;UGT1A8,intron_variant,,ENST00000609637,;UGT1A5,intron_variant,,ENST00000373414,;UGT1A6,intron_variant,,ENST00000406651,;UGT1A10,intron_variant,,ENST00…	T	ENSG00000244474
UGT1A4	0	.	GRCh37	2	234680959	234680959	+	Silent	SNP	G	G	A	novel	.	LUAD		TCGA-86-8073-01A-11D-2238-08	TCGA-86-8073-10A-01D-2238-08	G	G	.	.	.	.	.	.	.	.	.	.	.	.	.	.	.	c.1359G>A	p.%3D	p.V453V	ENST00000373409	5/5	60	50	9	74	74	0	UGT1A4,synonymous_variant,p.%3D,ENST00000373409,;UGT1A6,synonymous_variant,p.%3D,ENST00000305139,;UGT1A3,synonymous_variant,p.%3D,ENST00000482026,;UGT1A6,synonymous_variant,p.%3D,ENST00000373424,;UGT1A8,synonymous_variant,p.%3D,ENST00000608383,;UGT1A8,synonymous_variant,p.%3D,ENST00000608381,;UGT1A7,synonymous_variant,p.%3D,ENST00000373426,;UGT1A8,synonymous_variant,p.%3D,ENST00000609637,;UGT1A8,…	A	ENSG00000244474
UGT1A4	0	.	GRCh37	2	234627630	234627630	+	Missense_Mutation	SNP	G	G	T	novel	.	LUAD		TCGA-MP-A4TC-01A-11D-A24P-08	TCGA-MP-A4TC-10A-01D-A24P-08	G	G	.	.	.	.	.	.	.	.	.	.	.	.	.	.	.	c.164G>T	p.Gly55Val	p.G55V	ENST00000373409	1/5	52	41	11	77	77	0	UGT1A4,missense_variant,p.Gly55Val,ENST00000373409,;UGT1A10,intron_variant,,ENST00000373445,;UGT1A6,intron_variant,,ENST00000305139,;UGT1A6,intron_variant,,ENST00000373424,;UGT1A8,intron_variant,,ENST00000608381,;UGT1A7,intron_variant,,ENST00000373426,;UGT1A8,intron_variant,,ENST00000609637,;UGT1A5,intron_variant,,ENST00000373414,;UGT1A6,intron_variant,,ENST00000406651,;UGT1A10,intron_variant,,EN…	T	ENSG00000244474
UGT1A4	0	.	GRCh37	2	234628331	234628331	+	Missense_Mutation	SNP	C	C	G	rs745851656	.	LUSC		TCGA-21-1082-01A-01D-1521-08	TCGA-21-1082-10B-01D-1521-08	C	C	.	.	.	.	.	.	.	.	.	.	.	.	.	.	.	c.865C>G	p.Gln289Glu	p.Q289E	ENST00000373409	1/5	231	151	79	280	280	0	UGT1A4,missense_variant,p.Gln289Glu,ENST00000373409,;UGT1A10,intron_variant,,ENST00000373445,;UGT1A6,intron_variant,,ENST00000305139,;UGT1A6,intron_variant,,ENST00000373424,;UGT1A8,intron_variant,,ENST00000608381,;UGT1A7,intron_variant,,ENST00000373426,;UGT1A8,intron_variant,,ENST00000609637,;UGT1A5,intron_variant,,ENST00000373414,;UGT1A6,intron_variant,,ENST00000406651,;UGT1A10,intron_variant,,E…	G	ENSG00000244474
UGT1A4	0	.	GRCh37	2	234681017	234681017	+	Missense_Mutation	SNP	C	C	T	rs377565834	.	LUSC		TCGA-22-5482-01A-01D-1632-08	TCGA-22-5482-11A-01D-1632-08	C	C	.	.	.	.	.	.	.	.	.	.	.	.	.	.	.	c.1417C>T	p.Pro473Ser	p.P473S	ENST00000373409	5/5	103	78	24	109	109	0	UGT1A4,missense_variant,p.Pro473Ser,ENST00000373409,;UGT1A6,missense_variant,p.Pro471Ser,ENST00000305139,;UGT1A3,missense_variant,p.Pro473Ser,ENST00000482026,;UGT1A6,missense_variant,p.Pro204Ser,ENST00000373424,;UGT1A8,missense_variant,p.Pro472Ser,ENST00000608383,;UGT1A8,missense_variant,p.Pro473Ser,ENST00000608381,;UGT1A7,missense_variant,p.Pro469Ser,ENST00000373426,;UGT1A8,missense_variant,p.Pr…	T	ENSG00000244474
UGT1A4	0	.	GRCh37	2	234627612	234627612	+	Missense_Mutation	SNP	G	G	T	rs201968211	.	LUSC		TCGA-66-2734-01A-01D-0983-08	TCGA-66-2734-11A-01D-0983-08	G	G	.	.	.	.	.	.	.	.	.	.	.	.	.	.	.	c.146G>T	p.Arg49Leu	p.R49L	ENST00000373409	1/5	34	30	3	41	41	0	UGT1A4,missense_variant,p.Arg49Leu,ENST00000373409,;UGT1A10,intron_variant,,ENST00000373445,;UGT1A6,intron_variant,,ENST00000305139,;UGT1A6,intron_variant,,ENST00000373424,;UGT1A8,intron_variant,,ENST00000608381,;UGT1A7,intron_variant,,ENST00000373426,;UGT1A8,intron_variant,,ENST00000609637,;UGT1A5,intron_variant,,ENST00000373414,;UGT1A6,intron_variant,,ENST00000406651,;UGT1A10,intron_variant,,EN…	T	ENSG00000244474
UGT1A4	0	.	GRCh37	2	234628211	234628211	+	Missense_Mutation	SNP	G	G	T	.	.	LUSC		TCGA-66-2788-01A-01D-0983-08	TCGA-66-2788-11A-01D-0983-08	G	G	.	.	.	.	.	.	.	.	.	.	.	.	.	.	.	c.745G>T	p.Val249Phe	p.V249F	ENST00000373409	1/5	173	137	35	160	160	0	UGT1A4,missense_variant,p.Val249Phe,ENST00000373409,;UGT1A10,intron_variant,,ENST00000373445,;UGT1A6,intron_variant,,ENST00000305139,;UGT1A6,intron_variant,,ENST00000373424,;UGT1A8,intron_variant,,ENST00000608381,;UGT1A7,intron_variant,,ENST00000373426,;UGT1A8,intron_variant,,ENST00000609637,;UGT1A5,intron_variant,,ENST00000373414,;UGT1A6,intron_variant,,ENST00000406651,;UGT1A10,intron_variant,,E…	T	ENSG00000244474
UGT1A4	0	.	GRCh37	2	234627963	234627963	+	Missense_Mutation	SNP	C	C	T	rs149079663	.	LUSC		TCGA-68-8251-01A-11D-2293-08	TCGA-68-8251-10A-01D-2293-08	C	C	.	.	.	.	.	.	.	.	.	.	.	.	.	.	.	c.497C>T	p.Ser166Leu	p.S166L	ENST00000373409	1/5	298	225	73	247	247	0	UGT1A4,missense_variant,p.Ser166Leu,ENST00000373409,;UGT1A10,intron_variant,,ENST00000373445,;UGT1A6,intron_variant,,ENST00000305139,;UGT1A6,intron_variant,,ENST00000373424,;UGT1A8,intron_variant,,ENST00000608381,;UGT1A7,intron_variant,,ENST00000373426,;UGT1A8,intron_variant,,ENST00000609637,;UGT1A5,intron_variant,,ENST00000373414,;UGT1A6,intron_variant,,ENST00000406651,;UGT1A10,intron_variant,,E…	T	ENSG00000244474
UGT1A4	0	.	GRCh37	2	234680914	234680914	+	Silent	SNP	G	G	A	novel	.	LUSC		TCGA-77-6844-01A-11D-1945-08	TCGA-77-6844-10A-01D-1945-08	G	G	.	.	.	.	.	.	.	.	.	.	.	.	.	.	.	c.1314G>A	p.%3D	p.K438K	ENST00000373409	5/5	33	21	12	48	48	0	UGT1A4,synonymous_variant,p.%3D,ENST00000373409,;UGT1A6,synonymous_variant,p.%3D,ENST00000305139,;UGT1A3,synonymous_variant,p.%3D,ENST00000482026,;UGT1A6,synonymous_variant,p.%3D,ENST00000373424,;UGT1A8,synonymous_variant,p.%3D,ENST00000608383,;UGT1A8,synonymous_variant,p.%3D,ENST00000608381,;UGT1A7,synonymous_variant,p.%3D,ENST00000373426,;UGT1A8,synonymous_variant,p.%3D,ENST00000609637,;UGT1A8,…	A	ENSG00000244474
UGT1A4	0	.	GRCh37	2	234681129	234681129	+	Missense_Mutation	SNP	G	G	C	novel	.	LUSC		TCGA-NC-A5HL-01A-11D-A26M-08	TCGA-NC-A5HL-10A-01D-A26K-08	G	G	.	.	.	.	.	.	.	.	.	.	.	.	.	.	.	c.1529G>C	p.Cys510Ser	p.C510S	ENST00000373409	5/5	94	41	53	69	69	0	UGT1A4,missense_variant,p.Cys510Ser,ENST00000373409,;UGT1A6,missense_variant,p.Cys508Ser,ENST00000305139,;UGT1A3,missense_variant,p.Cys510Ser,ENST00000482026,;UGT1A6,missense_variant,p.Cys241Ser,ENST00000373424,;UGT1A8,missense_variant,p.Cys509Ser,ENST00000608383,;UGT1A8,missense_variant,p.Cys510Ser,ENST00000608381,;UGT1A7,missense_variant,p.Cys506Ser,ENST00000373426,;UGT1A8,missense_variant,p.Cy…	C	ENSG00000244474
UGT1A4	0	.	GRCh37	2	234627911	234627911	+	Missense_Mutation	SNP	G	G	A	.	.	OV		TCGA-13-2061-01A-01D-1526-09	TCGA-13-2061-10A-01D-1526-09	G	G	.	.	.	.	.	.	.	.	.	.	.	.	.	.	.	c.445G>A	p.Val149Ile	p.V149I	ENST00000373409	1/5	351	194	156	353	353	0	UGT1A4,missense_variant,p.Val149Ile,ENST00000373409,;UGT1A10,intron_variant,,ENST00000373445,;UGT1A6,intron_variant,,ENST00000305139,;UGT1A6,intron_variant,,ENST00000373424,;UGT1A8,intron_variant,,ENST00000608381,;UGT1A7,intron_variant,,ENST00000373426,;UGT1A8,intron_variant,,ENST00000609637,;UGT1A5,intron_variant,,ENST00000373414,;UGT1A6,intron_variant,,ENST00000406651,;UGT1A10,intron_variant,,E…	A	ENSG00000244474
UGT1A4	0	.	GRCh37	2	234681275	234681275	+	3'UTR	SNP	A	A	T	novel	.	OV		TCGA-29-1703-01A-01W-0633-09	TCGA-29-1703-10A-01W-0633-09	A	A	.	.	.	.	.	.	.	.	.	.	.	.	.	.	.	c.*70A>T	.	.	ENST00000373409	5/5	59	4	55	54	54	0	UGT1A4,3_prime_UTR_variant,,ENST00000373409,;UGT1A6,3_prime_UTR_variant,,ENST00000305139,;UGT1A3,3_prime_UTR_variant,,ENST00000482026,;UGT1A6,3_prime_UTR_variant,,ENST00000373424,;UGT1A8,3_prime_UTR_variant,,ENST00000608381,;UGT1A7,3_prime_UTR_variant,,ENST00000373426,;UGT1A8,3_prime_UTR_variant,,ENST00000609637,;UGT1A8,3_prime_UTR_variant,,ENST00000609767,;UGT1A5,3_prime_UTR_variant,,ENST0000037…	T	ENSG00000244474
UGT1A4	0	.	GRCh37	2	234627586	234627586	+	Silent	SNP	C	C	G	.	.	OV		TCGA-61-2012-01A-01W-0722-08	TCGA-61-2012-11A-01W-0722-08	C	C	.	.	.	.	.	.	.	.	.	.	.	.	.	.	.	c.120C>G	p.%3D	p.P40P	ENST00000373409	1/5	65	47	17	106	106	0	UGT1A4,synonymous_variant,p.%3D,ENST00000373409,;UGT1A10,intron_variant,,ENST00000373445,;UGT1A6,intron_variant,,ENST00000305139,;UGT1A6,intron_variant,,ENST00000373424,;UGT1A8,intron_variant,,ENST00000608381,;UGT1A7,intron_variant,,ENST00000373426,;UGT1A8,intron_variant,,ENST00000609637,;UGT1A5,intron_variant,,ENST00000373414,;UGT1A6,intron_variant,,ENST00000406651,;UGT1A10,intron_variant,,ENST0…	G	ENSG00000244474
UGT1A4	0	.	GRCh37	2	234681080	234681080	+	Missense_Mutation	SNP	G	G	T	.	.	OV		TCGA-09-1674-01A-01W-0633-09	TCGA-09-1674-10A-01W-0633-09	G	G	.	.	.	.	.	.	.	.	.	.	.	.	.	.	.	c.1480G>T	p.Gly494Cys	p.G494C	ENST00000373409	5/5	168	123	45	144	144	0	UGT1A4,missense_variant,p.Gly494Cys,ENST00000373409,;UGT1A6,missense_variant,p.Gly492Cys,ENST00000305139,;UGT1A3,missense_variant,p.Gly494Cys,ENST00000482026,;UGT1A6,missense_variant,p.Gly225Cys,ENST00000373424,;UGT1A8,missense_variant,p.Gly493Cys,ENST00000608383,;UGT1A8,missense_variant,p.Gly494Cys,ENST00000608381,;UGT1A7,missense_variant,p.Gly490Cys,ENST00000373426,;UGT1A8,missense_variant,p.Gl…	T	ENSG00000244474
UGT1A4	0	.	GRCh37	2	234627639	234627639	+	Missense_Mutation	SNP	C	C	T	rs141408391	.	PAAD		TCGA-H6-8124-01A-11D-2396-08	TCGA-H6-8124-10A-01D-2396-08	C	C	.	.	.	.	.	.	.	.	.	.	.	.	.	.	.	c.173C>T	p.Ala58Val	p.A58V	ENST00000373409	1/5	295	177	118	98	98	0	UGT1A4,missense_variant,p.Ala58Val,ENST00000373409,;UGT1A10,intron_variant,,ENST00000373445,;UGT1A6,intron_variant,,ENST00000305139,;UGT1A6,intron_variant,,ENST00000373424,;UGT1A8,intron_variant,,ENST00000608381,;UGT1A7,intron_variant,,ENST00000373426,;UGT1A8,intron_variant,,ENST00000609637,;UGT1A5,intron_variant,,ENST00000373414,;UGT1A6,intron_variant,,ENST00000406651,;UGT1A10,intron_variant,,EN…	T	ENSG00000244474
UGT1A4	0	.	GRCh37	2	234628298	234628309	+	In_Frame_Del	DEL	GGCATCAACTGT	GGCATCAACTGT	-	novel	.	PRAD		TCGA-HC-8216-01A-11D-A29Q-08	TCGA-HC-8216-10A-01D-A29Q-08	GGCATCAACTGT	GGCATCAACTGT	.	.	.	.	.	.	.	.	.	.	.	.	.	.	.	c.833_844delGCATCAACTGTG	p.Gly278_Cys281del	p.G278_C281del	ENST00000373409	1/5	232	210	22	217	217	0	UGT1A4,inframe_deletion,p.Gly278_Cys281del,ENST00000373409,;UGT1A10,intron_variant,,ENST00000373445,;UGT1A6,intron_variant,,ENST00000305139,;UGT1A6,intron_variant,,ENST00000373424,;UGT1A8,intron_variant,,ENST00000608381,;UGT1A7,intron_variant,,ENST00000373426,;UGT1A8,intron_variant,,ENST00000609637,;UGT1A5,intron_variant,,ENST00000373414,;UGT1A6,intron_variant,,ENST00000406651,;UGT1A10,intron_var…	-	ENSG00000244474
UGT1A4	0	.	GRCh37	2	234627798	234627798	+	Missense_Mutation	SNP	C	C	A	.	.	READ		TCGA-AG-3893-01A-01W-1073-09	TCGA-AG-3893-10A-01W-1073-09	C	C	.	.	.	.	.	.	.	.	.	.	.	.	.	.	.	c.332C>A	p.Ser111Tyr	p.S111Y	ENST00000373409	1/5	182	106	76	239	239	0	UGT1A4,missense_variant,p.Ser111Tyr,ENST00000373409,;UGT1A10,intron_variant,,ENST00000373445,;UGT1A6,intron_variant,,ENST00000305139,;UGT1A6,intron_variant,,ENST00000373424,;UGT1A8,intron_variant,,ENST00000608381,;UGT1A7,intron_variant,,ENST00000373426,;UGT1A8,intron_variant,,ENST00000609637,;UGT1A5,intron_variant,,ENST00000373414,;UGT1A6,intron_variant,,ENST00000406651,;UGT1A10,intron_variant,,E…	A	ENSG00000244474
UGT1A4	0	.	GRCh37	2	234628111	234628111	+	Silent	SNP	C	C	G	novel	.	READ		TCGA-AG-A01Y-01A-41W-A096-10	TCGA-AG-A01Y-11A-11W-A096-10	C	C	.	.	.	.	.	.	.	.	.	.	.	.	.	.	.	c.645C>G	p.%3D	p.L215L	ENST00000373409	1/5	311	203	107	380	379	0	UGT1A4,synonymous_variant,p.%3D,ENST00000373409,;UGT1A10,intron_variant,,ENST00000373445,;UGT1A6,intron_variant,,ENST00000305139,;UGT1A6,intron_variant,,ENST00000373424,;UGT1A8,intron_variant,,ENST00000608381,;UGT1A7,intron_variant,,ENST00000373426,;UGT1A8,intron_variant,,ENST00000609637,;UGT1A5,intron_variant,,ENST00000373414,;UGT1A6,intron_variant,,ENST00000406651,;UGT1A10,intron_variant,,ENST0…	G	ENSG00000244474
UGT1A4	0	.	GRCh37	2	234627744	234627744	+	Missense_Mutation	SNP	C	C	T	rs188914242	.	SARC		TCGA-DX-A3U5-01A-11D-A228-09	TCGA-DX-A3U5-10A-01D-A22A-09	C	C	.	.	.	.	.	.	.	.	.	.	.	.	.	.	.	c.278C>T	p.Thr93Met	p.T93M	ENST00000373409	1/5	43	22	21	48	48	0	UGT1A4,missense_variant,p.Thr93Met,ENST00000373409,;UGT1A10,intron_variant,,ENST00000373445,;UGT1A6,intron_variant,,ENST00000305139,;UGT1A6,intron_variant,,ENST00000373424,;UGT1A8,intron_variant,,ENST00000608381,;UGT1A7,intron_variant,,ENST00000373426,;UGT1A8,intron_variant,,ENST00000609637,;UGT1A5,intron_variant,,ENST00000373414,;UGT1A6,intron_variant,,ENST00000406651,;UGT1A10,intron_variant,,EN…	T	ENSG00000244474
UGT1A4	0	.	GRCh37	2	234681041	234681041	+	Missense_Mutation	SNP	G	G	A	rs751579554	.	SARC		TCGA-LI-A9QH-01A-11D-A37C-09	TCGA-LI-A9QH-10A-01D-A37F-09	G	G	.	.	.	.	.	.	.	.	.	.	.	.	.	.	.	c.1441G>A	p.Asp481Asn	p.D481N	ENST00000373409	5/5	30	19	11	25	25	0	UGT1A4,missense_variant,p.Asp481Asn,ENST00000373409,;UGT1A6,missense_variant,p.Asp479Asn,ENST00000305139,;UGT1A3,missense_variant,p.Asp481Asn,ENST00000482026,;UGT1A6,missense_variant,p.Asp212Asn,ENST00000373424,;UGT1A8,missense_variant,p.Asp480Asn,ENST00000608383,;UGT1A8,missense_variant,p.Asp481Asn,ENST00000608381,;UGT1A7,missense_variant,p.Asp477Asn,ENST00000373426,;UGT1A8,missense_variant,p.As…	A	ENSG00000244474
UGT1A4	0	.	GRCh37	2	234628291	234628291	+	Silent	SNP	C	C	T	novel	.	SKCM primary		TCGA-BF-AAP2-01A-11D-A401-08	TCGA-BF-AAP2-10A-01D-A401-08	C	C	.	.	.	.	.	.	.	.	.	.	.	.	.	.	.	c.825C>T	p.%3D	p.F275F	ENST00000373409	1/5	167	101	66	188	188	0	UGT1A4,synonymous_variant,p.%3D,ENST00000373409,;UGT1A10,intron_variant,,ENST00000373445,;UGT1A6,intron_variant,,ENST00000305139,;UGT1A6,intron_variant,,ENST00000373424,;UGT1A8,intron_variant,,ENST00000608381,;UGT1A7,intron_variant,,ENST00000373426,;UGT1A8,intron_variant,,ENST00000609637,;UGT1A5,intron_variant,,ENST00000373414,;UGT1A6,intron_variant,,ENST00000406651,;UGT1A10,intron_variant,,ENST0…	T	ENSG00000244474
UGT1A4	0	.	GRCh37	2	234681093	234681093	+	Missense_Mutation	SNP	C	C	T	.	.	SKCM primary		TCGA-EB-A431-01A-11D-A25O-08	TCGA-EB-A431-10A-01D-A25O-08	C	C	.	.	.	.	.	.	.	.	.	.	.	.	.	.	.	c.1493C>T	p.Ala498Val	p.A498V	ENST00000373409	5/5	79	27	52	75	75	0	UGT1A4,missense_variant,p.Ala498Val,ENST00000373409,;UGT1A6,missense_variant,p.Ala496Val,ENST00000305139,;UGT1A3,missense_variant,p.Ala498Val,ENST00000482026,;UGT1A6,missense_variant,p.Ala229Val,ENST00000373424,;UGT1A8,missense_variant,p.Ala497Val,ENST00000608383,;UGT1A8,missense_variant,p.Ala498Val,ENST00000608381,;UGT1A7,missense_variant,p.Ala494Val,ENST00000373426,;UGT1A8,missense_variant,p.Al…	T	ENSG00000244474
UGT1A4	0	.	GRCh37	2	234627932	234627932	+	Missense_Mutation	SNP	C	C	T	novel	.	SKCM primary		TCGA-EB-A5UM-01A-11D-A30X-08	TCGA-EB-A5UM-10A-01D-A30X-08	C	C	.	.	.	.	.	.	.	.	.	.	.	.	.	.	.	c.466C>T	p.Leu156Phe	p.L156F	ENST00000373409	1/5	170	115	54	207	207	0	UGT1A4,missense_variant,p.Leu156Phe,ENST00000373409,;UGT1A10,intron_variant,,ENST00000373445,;UGT1A6,intron_variant,,ENST00000305139,;UGT1A6,intron_variant,,ENST00000373424,;UGT1A8,intron_variant,,ENST00000608381,;UGT1A7,intron_variant,,ENST00000373426,;UGT1A8,intron_variant,,ENST00000609637,;UGT1A5,intron_variant,,ENST00000373414,;UGT1A6,intron_variant,,ENST00000406651,;UGT1A10,intron_variant,,E…	T	ENSG00000244474
UGT1A4	0	.	GRCh37	2	234627691	234627691	+	Silent	SNP	C	C	T	novel	.	SKCM primary		TCGA-YG-AA3N-01A-11D-A38G-08	TCGA-YG-AA3N-10A-01D-A38J-08	C	C	.	.	.	.	.	.	.	.	.	.	.	.	.	.	.	c.225C>T	p.%3D	p.F75F	ENST00000373409	1/5	48	34	14	54	54	0	UGT1A4,synonymous_variant,p.%3D,ENST00000373409,;UGT1A10,intron_variant,,ENST00000373445,;UGT1A6,intron_variant,,ENST00000305139,;UGT1A6,intron_variant,,ENST00000373424,;UGT1A8,intron_variant,,ENST00000608381,;UGT1A7,intron_variant,,ENST00000373426,;UGT1A8,intron_variant,,ENST00000609637,;UGT1A5,intron_variant,,ENST00000373414,;UGT1A6,intron_variant,,ENST00000406651,;UGT1A10,intron_variant,,ENST0…	T	ENSG00000244474
UGT1A4	0	.	GRCh37	2	234628204	234628204	+	Silent	SNP	G	G	A	novel	.	SKCM-Metastatic		TCGA-3N-A9WD-06A-11D-A38G-08	TCGA-3N-A9WD-10A-01D-A38J-08	G	G	.	.	.	.	.	.	.	.	.	.	.	.	.	.	.	c.738G>A	p.%3D	p.V246V	ENST00000373409	1/5	242	227	14	210	210	0	UGT1A4,synonymous_variant,p.%3D,ENST00000373409,;UGT1A10,intron_variant,,ENST00000373445,;UGT1A6,intron_variant,,ENST00000305139,;UGT1A6,intron_variant,,ENST00000373424,;UGT1A8,intron_variant,,ENST00000608381,;UGT1A7,intron_variant,,ENST00000373426,;UGT1A8,intron_variant,,ENST00000609637,;UGT1A5,intron_variant,,ENST00000373414,;UGT1A6,intron_variant,,ENST00000406651,;UGT1A10,intron_variant,,ENST0…	A	ENSG00000244474
UGT1A4	0	.	GRCh37	2	234681041	234681041	+	Missense_Mutation	SNP	G	G	A	rs751579554	.	SKCM-Metastatic		TCGA-D3-A3C1-06A-12D-A196-08	TCGA-D3-A3C1-10A-01D-A198-08	G	G	.	.	.	.	.	.	.	.	.	.	.	.	.	.	.	c.1441G>A	p.Asp481Asn	p.D481N	ENST00000373409	5/5	133	113	19	170	170	0	UGT1A4,missense_variant,p.Asp481Asn,ENST00000373409,;UGT1A6,missense_variant,p.Asp479Asn,ENST00000305139,;UGT1A3,missense_variant,p.Asp481Asn,ENST00000482026,;UGT1A6,missense_variant,p.Asp212Asn,ENST00000373424,;UGT1A8,missense_variant,p.Asp480Asn,ENST00000608383,;UGT1A8,missense_variant,p.Asp481Asn,ENST00000608381,;UGT1A7,missense_variant,p.Asp477Asn,ENST00000373426,;UGT1A8,missense_variant,p.As…	A	ENSG00000244474
UGT1A4	0	.	GRCh37	2	234680942	234680942	+	Missense_Mutation	SNP	C	C	T	novel	.	SKCM-Metastatic		TCGA-D3-A8GL-06A-11D-A372-08	TCGA-D3-A8GL-10A-01D-A375-08	C	C	.	.	.	.	.	.	.	.	.	.	.	.	.	.	.	c.1342C>T	p.His448Tyr	p.H448Y	ENST00000373409	5/5	52	29	23	51	51	0	UGT1A4,missense_variant,p.His448Tyr,ENST00000373409,;UGT1A6,missense_variant,p.His446Tyr,ENST00000305139,;UGT1A3,missense_variant,p.His448Tyr,ENST00000482026,;UGT1A6,missense_variant,p.His179Tyr,ENST00000373424,;UGT1A8,missense_variant,p.His447Tyr,ENST00000608383,;UGT1A8,missense_variant,p.His448Tyr,ENST00000608381,;UGT1A7,missense_variant,p.His444Tyr,ENST00000373426,;UGT1A8,missense_variant,p.Hi…	T	ENSG00000244474
UGT1A4	0	.	GRCh37	2	234628239	234628239	+	Missense_Mutation	SNP	G	G	T	rs760663829	.	SKCM-Metastatic		TCGA-D3-A8GM-06A-11D-A372-08	TCGA-D3-A8GM-10A-01D-A375-08	G	G	.	.	.	.	.	.	.	.	.	.	.	.	.	.	.	c.773G>T	p.Arg258Leu	p.R258L	ENST00000373409	1/5	256	208	47	246	246	0	UGT1A4,missense_variant,p.Arg258Leu,ENST00000373409,;UGT1A10,intron_variant,,ENST00000373445,;UGT1A6,intron_variant,,ENST00000305139,;UGT1A6,intron_variant,,ENST00000373424,;UGT1A8,intron_variant,,ENST00000608381,;UGT1A7,intron_variant,,ENST00000373426,;UGT1A8,intron_variant,,ENST00000609637,;UGT1A5,intron_variant,,ENST00000373414,;UGT1A6,intron_variant,,ENST00000406651,;UGT1A10,intron_variant,,E…	T	ENSG00000244474
UGT1A4	0	.	GRCh37	2	234628242	234628242	+	Missense_Mutation	SNP	G	G	A	novel	.	SKCM-Metastatic		TCGA-D3-A8GO-06A-11D-A372-08	TCGA-D3-A8GO-10A-01D-A375-08	G	G	.	.	.	.	.	.	.	.	.	.	.	.	.	.	.	c.776G>A	p.Gly259Glu	p.G259E	ENST00000373409	1/5	239	204	34	211	211	0	UGT1A4,missense_variant,p.Gly259Glu,ENST00000373409,;UGT1A10,intron_variant,,ENST00000373445,;UGT1A6,intron_variant,,ENST00000305139,;UGT1A6,intron_variant,,ENST00000373424,;UGT1A8,intron_variant,,ENST00000608381,;UGT1A7,intron_variant,,ENST00000373426,;UGT1A8,intron_variant,,ENST00000609637,;UGT1A5,intron_variant,,ENST00000373414,;UGT1A6,intron_variant,,ENST00000406651,;UGT1A10,intron_variant,,E…	A	ENSG00000244474
UGT1A4	0	.	GRCh37	2	234627728	234627728	+	Missense_Mutation	SNP	G	G	A	rs572333603	.	SKCM-Metastatic		TCGA-D9-A1JW-06A-11D-A19A-08	TCGA-D9-A1JW-10A-01D-A19A-08	G	G	.	.	.	.	.	.	.	.	.	.	.	.	.	.	.	c.262G>A	p.Glu88Lys	p.E88K	ENST00000373409	1/5	59	34	25	51	51	0	UGT1A4,missense_variant,p.Glu88Lys,ENST00000373409,;UGT1A10,intron_variant,,ENST00000373445,;UGT1A6,intron_variant,,ENST00000305139,;UGT1A6,intron_variant,,ENST00000373424,;UGT1A8,intron_variant,,ENST00000608381,;UGT1A7,intron_variant,,ENST00000373426,;UGT1A8,intron_variant,,ENST00000609637,;UGT1A5,intron_variant,,ENST00000373414,;UGT1A6,intron_variant,,ENST00000406651,;UGT1A10,intron_variant,,EN…	A	ENSG00000244474
UGT1A4	0	.	GRCh37	2	234627473	234627473	+	Nonsense_Mutation	SNP	A	A	T	novel	.	SKCM-Metastatic		TCGA-DA-A1HY-06A-11D-A19A-08	TCGA-DA-A1HY-10A-01D-A19A-08	A	A	.	.	.	.	.	.	.	.	.	.	.	.	.	.	.	c.7A>T	p.Arg3Ter	p.R3*	ENST00000373409	1/5	44	20	23	39	39	0	UGT1A4,stop_gained,p.Arg3Ter,ENST00000373409,;UGT1A10,intron_variant,,ENST00000373445,;UGT1A6,intron_variant,,ENST00000305139,;UGT1A6,intron_variant,,ENST00000373424,;UGT1A8,intron_variant,,ENST00000608381,;UGT1A7,intron_variant,,ENST00000373426,;UGT1A8,intron_variant,,ENST00000609637,;UGT1A5,intron_variant,,ENST00000373414,;UGT1A6,intron_variant,,ENST00000406651,;UGT1A10,intron_variant,,ENST0000…	T	ENSG00000244474
UGT1A4	0	.	GRCh37	2	234628299	234628299	+	Missense_Mutation	SNP	G	G	A	rs759057764	.	SKCM-Metastatic		TCGA-EE-A180-06A-11D-A21A-08	TCGA-EE-A180-10B-01D-A21A-08	G	G	.	.	.	.	.	.	.	.	.	.	.	.	.	.	.	c.833G>A	p.Gly278Asp	p.G278D	ENST00000373409	1/5	426	281	145	375	375	0	UGT1A4,missense_variant,p.Gly278Asp,ENST00000373409,;UGT1A10,intron_variant,,ENST00000373445,;UGT1A6,intron_variant,,ENST00000305139,;UGT1A6,intron_variant,,ENST00000373424,;UGT1A8,intron_variant,,ENST00000608381,;UGT1A7,intron_variant,,ENST00000373426,;UGT1A8,intron_variant,,ENST00000609637,;UGT1A5,intron_variant,,ENST00000373414,;UGT1A6,intron_variant,,ENST00000406651,;UGT1A10,intron_variant,,E…	A	ENSG00000244474
UGT1A4	0	.	GRCh37	2	234627964	234627964	+	Silent	SNP	G	G	A	rs368511777	.	SKCM-Metastatic		TCGA-EE-A20C-06A-11D-A196-08	TCGA-EE-A20C-10A-01D-A198-08	G	G	.	.	.	.	.	.	.	.	.	.	.	.	.	.	.	c.498G>A	p.%3D	p.S166S	ENST00000373409	1/5	109	43	65	196	196	0	UGT1A4,synonymous_variant,p.%3D,ENST00000373409,;UGT1A10,intron_variant,,ENST00000373445,;UGT1A6,intron_variant,,ENST00000305139,;UGT1A6,intron_variant,,ENST00000373424,;UGT1A8,intron_variant,,ENST00000608381,;UGT1A7,intron_variant,,ENST00000373426,;UGT1A8,intron_variant,,ENST00000609637,;UGT1A5,intron_variant,,ENST00000373414,;UGT1A6,intron_variant,,ENST00000406651,;UGT1A10,intron_variant,,ENST0…	A	ENSG00000244474
UGT1A4	0	.	GRCh37	2	234628081	234628081	+	Missense_Mutation	SNP	G	G	A	novel	.	SKCM-Metastatic		TCGA-EE-A29B-06A-11D-A197-08	TCGA-EE-A29B-10A-01D-A199-08	G	G	.	.	.	.	.	.	.	.	.	.	.	.	.	.	.	c.615G>A	p.Met205Ile	p.M205I	ENST00000373409	1/5	94	59	34	178	178	0	UGT1A4,missense_variant,p.Met205Ile,ENST00000373409,;UGT1A10,intron_variant,,ENST00000373445,;UGT1A6,intron_variant,,ENST00000305139,;UGT1A6,intron_variant,,ENST00000373424,;UGT1A8,intron_variant,,ENST00000608381,;UGT1A7,intron_variant,,ENST00000373426,;UGT1A8,intron_variant,,ENST00000609637,;UGT1A5,intron_variant,,ENST00000373414,;UGT1A6,intron_variant,,ENST00000406651,;UGT1A10,intron_variant,,E…	A	ENSG00000244474
UGT1A4	0	.	GRCh37	2	234627950	234627950	+	Missense_Mutation	SNP	G	G	A	novel	.	SKCM-Metastatic		TCGA-EE-A29V-06A-12D-A197-08	TCGA-EE-A29V-10A-01D-A199-08	G	G	.	.	.	.	.	.	.	.	.	.	.	.	.	.	.	c.484G>A	p.Ala162Thr	p.A162T	ENST00000373409	1/5	137	97	39	139	139	0	UGT1A4,missense_variant,p.Ala162Thr,ENST00000373409,;UGT1A10,intron_variant,,ENST00000373445,;UGT1A6,intron_variant,,ENST00000305139,;UGT1A6,intron_variant,,ENST00000373424,;UGT1A8,intron_variant,,ENST00000608381,;UGT1A7,intron_variant,,ENST00000373426,;UGT1A8,intron_variant,,ENST00000609637,;UGT1A5,intron_variant,,ENST00000373414,;UGT1A6,intron_variant,,ENST00000406651,;UGT1A10,intron_variant,,E…	A	ENSG00000244474
UGT1A4	0	.	GRCh37	2	234680923	234680923	+	Silent	SNP	C	C	T	.	.	SKCM-Metastatic		TCGA-EE-A2GU-06A-11D-A196-08	TCGA-EE-A2GU-10A-01D-A198-08	C	C	.	.	.	.	.	.	.	.	.	.	.	.	.	.	.	c.1323C>T	p.%3D	p.I441I	ENST00000373409	5/5	47	39	8	42	42	0	UGT1A4,synonymous_variant,p.%3D,ENST00000373409,;UGT1A6,synonymous_variant,p.%3D,ENST00000305139,;UGT1A3,synonymous_variant,p.%3D,ENST00000482026,;UGT1A6,synonymous_variant,p.%3D,ENST00000373424,;UGT1A8,synonymous_variant,p.%3D,ENST00000608383,;UGT1A8,synonymous_variant,p.%3D,ENST00000608381,;UGT1A7,synonymous_variant,p.%3D,ENST00000373426,;UGT1A8,synonymous_variant,p.%3D,ENST00000609637,;UGT1A8,…	T	ENSG00000244474
UGT1A4	0	.	GRCh37	2	234628150	234628150	+	Silent	SNP	T	T	C	novel	.	SKCM-Metastatic		TCGA-EE-A2M5-06A-12D-A197-08	TCGA-EE-A2M5-10A-01D-A199-08	T	T	.	.	.	.	.	.	.	.	.	.	.	.	.	.	.	c.684T>C	p.%3D	p.S228S	ENST00000373409	1/5	170	106	64	157	157	0	UGT1A4,synonymous_variant,p.%3D,ENST00000373409,;UGT1A10,intron_variant,,ENST00000373445,;UGT1A6,intron_variant,,ENST00000305139,;UGT1A6,intron_variant,,ENST00000373424,;UGT1A8,intron_variant,,ENST00000608381,;UGT1A7,intron_variant,,ENST00000373426,;UGT1A8,intron_variant,,ENST00000609637,;UGT1A5,intron_variant,,ENST00000373414,;UGT1A6,intron_variant,,ENST00000406651,;UGT1A10,intron_variant,,ENST0…	C	ENSG00000244474
UGT1A4	0	.	GRCh37	2	234627653	234627653	+	Missense_Mutation	SNP	C	C	A	novel	.	SKCM-Metastatic		TCGA-EE-A2M8-06A-12D-A196-08	TCGA-EE-A2M8-10A-01D-A198-08	C	C	.	.	.	.	.	.	.	.	.	.	.	.	.	.	.	c.187C>A	p.Pro63Thr	p.P63T	ENST00000373409	1/5	48	43	5	30	30	0	UGT1A4,missense_variant,p.Pro63Thr,ENST00000373409,;UGT1A10,intron_variant,,ENST00000373445,;UGT1A6,intron_variant,,ENST00000305139,;UGT1A6,intron_variant,,ENST00000373424,;UGT1A8,intron_variant,,ENST00000608381,;UGT1A7,intron_variant,,ENST00000373426,;UGT1A8,intron_variant,,ENST00000609637,;UGT1A5,intron_variant,,ENST00000373414,;UGT1A6,intron_variant,,ENST00000406651,;UGT1A10,intron_variant,,EN…	A	ENSG00000244474
UGT1A4	0	.	GRCh37	2	234628096	234628096	+	Silent	SNP	G	G	A	novel	.	SKCM-Metastatic		TCGA-EE-A2MD-06A-11D-A197-08	TCGA-EE-A2MD-10A-01D-A199-08	G	G	.	.	.	.	.	.	.	.	.	.	.	.	.	.	.	c.630G>A	p.%3D	p.R210R	ENST00000373409	1/5	162	117	45	152	152	0	UGT1A4,synonymous_variant,p.%3D,ENST00000373409,;UGT1A10,intron_variant,,ENST00000373445,;UGT1A6,intron_variant,,ENST00000305139,;UGT1A6,intron_variant,,ENST00000373424,;UGT1A8,intron_variant,,ENST00000608381,;UGT1A7,intron_variant,,ENST00000373426,;UGT1A8,intron_variant,,ENST00000609637,;UGT1A5,intron_variant,,ENST00000373414,;UGT1A6,intron_variant,,ENST00000406651,;UGT1A10,intron_variant,,ENST0…	A	ENSG00000244474
UGT1A4	0	.	GRCh37	2	234627835	234627835	+	Silent	SNP	C	C	T	novel	.	SKCM-Metastatic		TCGA-EE-A2MR-06A-11D-A196-08	TCGA-EE-A2MR-10A-01D-A198-08	C	C	.	.	.	.	.	.	.	.	.	.	.	.	.	.	.	c.369C>T	p.%3D	p.A123A	ENST00000373409	1/5	191	168	22	217	217	0	UGT1A4,synonymous_variant,p.%3D,ENST00000373409,;UGT1A10,intron_variant,,ENST00000373445,;UGT1A6,intron_variant,,ENST00000305139,;UGT1A6,intron_variant,,ENST00000373424,;UGT1A8,intron_variant,,ENST00000608381,;UGT1A7,intron_variant,,ENST00000373426,;UGT1A8,intron_variant,,ENST00000609637,;UGT1A5,intron_variant,,ENST00000373414,;UGT1A6,intron_variant,,ENST00000406651,;UGT1A10,intron_variant,,ENST0…	T	ENSG00000244474
UGT1A4	0	.	GRCh37	2	234627556	234627556	+	Silent	SNP	G	G	A	rs760663679	.	SKCM-Metastatic		TCGA-EE-A2MS-06A-11D-A197-08	TCGA-EE-A2MS-10A-01D-A199-08	G	G	.	.	.	.	.	.	.	.	.	.	.	.	.	.	.	c.90G>A	p.%3D	p.K30K	ENST00000373409	1/5	24	12	12	61	61	0	UGT1A4,synonymous_variant,p.%3D,ENST00000373409,;UGT1A10,intron_variant,,ENST00000373445,;UGT1A6,intron_variant,,ENST00000305139,;UGT1A6,intron_variant,,ENST00000373424,;UGT1A8,intron_variant,,ENST00000608381,;UGT1A7,intron_variant,,ENST00000373426,;UGT1A8,intron_variant,,ENST00000609637,;UGT1A5,intron_variant,,ENST00000373414,;UGT1A6,intron_variant,,ENST00000406651,;UGT1A10,intron_variant,,ENST0…	A	ENSG00000244474
UGT1A4	0	.	GRCh37	2	234680956	234680956	+	Silent	SNP	G	G	T	rs368860136	.	SKCM-Metastatic		TCGA-EE-A3AA-06A-11D-A196-08	TCGA-EE-A3AA-10A-01D-A198-08	G	G	.	.	.	.	.	.	.	.	.	.	.	.	.	.	.	c.1356G>T	p.%3D	p.P452P	ENST00000373409	5/5	37	32	5	86	84	1	UGT1A4,synonymous_variant,p.%3D,ENST00000373409,;UGT1A6,synonymous_variant,p.%3D,ENST00000305139,;UGT1A3,synonymous_variant,p.%3D,ENST00000482026,;UGT1A6,synonymous_variant,p.%3D,ENST00000373424,;UGT1A8,synonymous_variant,p.%3D,ENST00000608383,;UGT1A8,synonymous_variant,p.%3D,ENST00000608381,;UGT1A7,synonymous_variant,p.%3D,ENST00000373426,;UGT1A8,synonymous_variant,p.%3D,ENST00000609637,;UGT1A8,…	T	ENSG00000244474
UGT1A4	0	.	GRCh37	2	234627728	234627728	+	Missense_Mutation	SNP	G	G	A	rs572333603	.	SKCM-Metastatic		TCGA-EE-A3J5-06A-11D-A20D-08	TCGA-EE-A3J5-10A-01D-A20D-08	G	G	.	.	.	.	.	.	.	.	.	.	.	.	.	.	.	c.262G>A	p.Glu88Lys	p.E88K	ENST00000373409	1/5	65	44	21	77	77	0	UGT1A4,missense_variant,p.Glu88Lys,ENST00000373409,;UGT1A10,intron_variant,,ENST00000373445,;UGT1A6,intron_variant,,ENST00000305139,;UGT1A6,intron_variant,,ENST00000373424,;UGT1A8,intron_variant,,ENST00000608381,;UGT1A7,intron_variant,,ENST00000373426,;UGT1A8,intron_variant,,ENST00000609637,;UGT1A5,intron_variant,,ENST00000373414,;UGT1A6,intron_variant,,ENST00000406651,;UGT1A10,intron_variant,,EN…	A	ENSG00000244474
UGT1A4	0	.	GRCh37	2	234681080	234681080	+	Missense_Mutation	SNP	G	G	A	.	.	SKCM-Metastatic		TCGA-FS-A1ZA-06A-11D-A197-08	TCGA-FS-A1ZA-10A-01D-A199-08	G	G	.	.	.	.	.	.	.	.	.	.	.	.	.	.	.	c.1480G>A	p.Gly494Ser	p.G494S	ENST00000373409	5/5	84	46	38	96	96	0	UGT1A4,missense_variant,p.Gly494Ser,ENST00000373409,;UGT1A6,missense_variant,p.Gly492Ser,ENST00000305139,;UGT1A3,missense_variant,p.Gly494Ser,ENST00000482026,;UGT1A6,missense_variant,p.Gly225Ser,ENST00000373424,;UGT1A8,missense_variant,p.Gly493Ser,ENST00000608383,;UGT1A8,missense_variant,p.Gly494Ser,ENST00000608381,;UGT1A7,missense_variant,p.Gly490Ser,ENST00000373426,;UGT1A8,missense_variant,p.Gl…	A	ENSG00000244474
UGT1A4	0	.	GRCh37	2	234681160	234681160	+	Silent	SNP	G	G	A	.	.	SKCM-Metastatic		TCGA-FS-A1ZC-06A-11D-A197-08	TCGA-FS-A1ZC-10A-01D-A199-08	G	G	.	.	.	.	.	.	.	.	.	.	.	.	.	.	.	c.1560G>A	p.%3D	p.G520G	ENST00000373409	5/5	45	33	12	29	29	0	UGT1A4,synonymous_variant,p.%3D,ENST00000373409,;UGT1A6,synonymous_variant,p.%3D,ENST00000305139,;UGT1A3,synonymous_variant,p.%3D,ENST00000482026,;UGT1A6,synonymous_variant,p.%3D,ENST00000373424,;UGT1A8,synonymous_variant,p.%3D,ENST00000608383,;UGT1A8,synonymous_variant,p.%3D,ENST00000608381,;UGT1A7,synonymous_variant,p.%3D,ENST00000373426,;UGT1A8,synonymous_variant,p.%3D,ENST00000609637,;UGT1A8,…	A	ENSG00000244474
UGT1A4	0	.	GRCh37	2	234628284	234628284	+	Missense_Mutation	SNP	T	T	C	rs748381682	.	SKCM-Metastatic		TCGA-FS-A1ZK-06A-11D-A197-08	TCGA-FS-A1ZK-10A-01D-A199-08	T	T	.	.	.	.	.	.	.	.	.	.	.	.	.	.	.	c.818T>C	p.Met273Thr	p.M273T	ENST00000373409	1/5	107	96	11	158	158	0	UGT1A4,missense_variant,p.Met273Thr,ENST00000373409,;UGT1A10,intron_variant,,ENST00000373445,;UGT1A6,intron_variant,,ENST00000305139,;UGT1A6,intron_variant,,ENST00000373424,;UGT1A8,intron_variant,,ENST00000608381,;UGT1A7,intron_variant,,ENST00000373426,;UGT1A8,intron_variant,,ENST00000609637,;UGT1A5,intron_variant,,ENST00000373414,;UGT1A6,intron_variant,,ENST00000406651,;UGT1A10,intron_variant,,E…	C	ENSG00000244474
UGT1A4	0	.	GRCh37	2	234681148	234681148	+	Silent	SNP	G	G	A	.	.	SKCM-Metastatic		TCGA-FS-A1ZS-06A-12D-A197-08	TCGA-FS-A1ZS-10A-01D-A199-08	G	G	.	.	.	.	.	.	.	.	.	.	.	.	.	.	.	c.1548G>A	p.%3D	p.R516R	ENST00000373409	5/5	51	23	27	23	23	0	UGT1A4,synonymous_variant,p.%3D,ENST00000373409,;UGT1A6,synonymous_variant,p.%3D,ENST00000305139,;UGT1A3,synonymous_variant,p.%3D,ENST00000482026,;UGT1A6,synonymous_variant,p.%3D,ENST00000373424,;UGT1A8,synonymous_variant,p.%3D,ENST00000608383,;UGT1A8,synonymous_variant,p.%3D,ENST00000608381,;UGT1A7,synonymous_variant,p.%3D,ENST00000373426,;UGT1A8,synonymous_variant,p.%3D,ENST00000609637,;UGT1A8,…	A	ENSG00000244474
UGT1A4	0	.	GRCh37	2	234627798	234627798	+	Missense_Mutation	SNP	C	C	T	.	.	SKCM-Metastatic		TCGA-RP-A693-06A-13D-A30X-08	TCGA-RP-A693-10A-01D-A30X-08	C	C	.	.	.	.	.	.	.	.	.	.	.	.	.	.	.	c.332C>T	p.Ser111Phe	p.S111F	ENST00000373409	1/5	149	119	30	168	168	0	UGT1A4,missense_variant,p.Ser111Phe,ENST00000373409,;UGT1A10,intron_variant,,ENST00000373445,;UGT1A6,intron_variant,,ENST00000305139,;UGT1A6,intron_variant,,ENST00000373424,;UGT1A8,intron_variant,,ENST00000608381,;UGT1A7,intron_variant,,ENST00000373426,;UGT1A8,intron_variant,,ENST00000609637,;UGT1A5,intron_variant,,ENST00000373414,;UGT1A6,intron_variant,,ENST00000406651,;UGT1A10,intron_variant,,E…	T	ENSG00000244474
UGT1A4	0	.	GRCh37	2	234627728	234627728	+	Missense_Mutation	SNP	G	G	A	rs572333603	.	SKCM-Metastatic		TCGA-RP-A694-06A-11D-A30X-08	TCGA-RP-A694-10A-01D-A30X-08	G	G	.	.	.	.	.	.	.	.	.	.	.	.	.	.	.	c.262G>A	p.Glu88Lys	p.E88K	ENST00000373409	1/5	67	54	13	93	92	0	UGT1A4,missense_variant,p.Glu88Lys,ENST00000373409,;UGT1A10,intron_variant,,ENST00000373445,;UGT1A6,intron_variant,,ENST00000305139,;UGT1A6,intron_variant,,ENST00000373424,;UGT1A8,intron_variant,,ENST00000608381,;UGT1A7,intron_variant,,ENST00000373426,;UGT1A8,intron_variant,,ENST00000609637,;UGT1A5,intron_variant,,ENST00000373414,;UGT1A6,intron_variant,,ENST00000406651,;UGT1A10,intron_variant,,EN…	A	ENSG00000244474
UGT1A4	0	.	GRCh37	2	234681031	234681031	+	Silent	SNP	C	C	T	rs28900406	.	SKCM-Metastatic		TCGA-W3-A824-06A-21D-A34U-08	TCGA-W3-A824-10A-01D-A34X-08	C	C	.	.	.	.	.	.	.	.	.	.	.	.	.	.	.	c.1431C>T	p.%3D	p.P477P	ENST00000373409	5/5	119	77	42	137	136	0	UGT1A4,synonymous_variant,p.%3D,ENST00000373409,;UGT1A6,synonymous_variant,p.%3D,ENST00000305139,;UGT1A3,synonymous_variant,p.%3D,ENST00000482026,;UGT1A6,synonymous_variant,p.%3D,ENST00000373424,;UGT1A8,synonymous_variant,p.%3D,ENST00000608383,;UGT1A8,synonymous_variant,p.%3D,ENST00000608381,;UGT1A7,synonymous_variant,p.%3D,ENST00000373426,;UGT1A8,synonymous_variant,p.%3D,ENST00000609637,;UGT1A8,…	T	ENSG00000244474
UGT1A4	0	.	GRCh37	2	234627717	234627717	+	Nonsense_Mutation	SNP	G	G	A	.	.	SKCM-Metastatic		TCGA-Z2-A8RT-06A-11D-A372-08	TCGA-Z2-A8RT-10A-01D-A375-08	G	G	.	.	.	.	.	.	.	.	.	.	.	.	.	.	.	c.251G>A	p.Trp84Ter	p.W84*	ENST00000373409	1/5	107	66	40	107	107	0	UGT1A4,stop_gained,p.Trp84Ter,ENST00000373409,;UGT1A10,intron_variant,,ENST00000373445,;UGT1A6,intron_variant,,ENST00000305139,;UGT1A6,intron_variant,,ENST00000373424,;UGT1A8,intron_variant,,ENST00000608381,;UGT1A7,intron_variant,,ENST00000373426,;UGT1A8,intron_variant,,ENST00000609637,;UGT1A5,intron_variant,,ENST00000373414,;UGT1A6,intron_variant,,ENST00000406651,;UGT1A10,intron_variant,,ENST000…	A	ENSG00000244474
UGT1A4	0	.	GRCh37	2	234627977	234627977	+	Frame_Shift_Del	DEL	T	T	-	rs780658532	.	STAD		TCGA-BR-4184-01A-01D-1126-08	TCGA-BR-4184-11A-01D-1126-08	T	T	.	.	.	.	.	.	.	.	.	.	.	.	.	.	.	c.517delT	p.Trp173GlyfsTer8	p.W173Gfs*8	ENST00000373409	1/5	208	173	35	165	165	0	UGT1A4,frameshift_variant,p.Trp173GlyfsTer8,ENST00000373409,;UGT1A10,intron_variant,,ENST00000373445,;UGT1A6,intron_variant,,ENST00000305139,;UGT1A6,intron_variant,,ENST00000373424,;UGT1A8,intron_variant,,ENST00000608381,;UGT1A7,intron_variant,,ENST00000373426,;UGT1A8,intron_variant,,ENST00000609637,;UGT1A5,intron_variant,,ENST00000373414,;UGT1A6,intron_variant,,ENST00000406651,;UGT1A10,intron_va…	-	ENSG00000244474
UGT1A4	0	.	GRCh37	2	234627976	234627977	+	Frame_Shift_Ins	INS	-	-	T	.	.	STAD		TCGA-BR-4361-01A-01D-1158-08	TCGA-BR-4361-11A-01D-1158-08	-	-	.	.	.	.	.	.	.	.	.	.	.	.	.	.	.	c.517dupT	p.Trp173LeufsTer7	p.W173Lfs*7	ENST00000373409	1/5	338	243	95	421	421	0	UGT1A4,frameshift_variant,p.Trp173LeufsTer7,ENST00000373409,;UGT1A10,intron_variant,,ENST00000373445,;UGT1A6,intron_variant,,ENST00000305139,;UGT1A6,intron_variant,,ENST00000373424,;UGT1A8,intron_variant,,ENST00000608381,;UGT1A7,intron_variant,,ENST00000373426,;UGT1A8,intron_variant,,ENST00000609637,;UGT1A5,intron_variant,,ENST00000373414,;UGT1A6,intron_variant,,ENST00000406651,;UGT1A10,intron_va…	T	ENSG00000244474
UGT1A4	0	.	GRCh37	2	234627977	234627977	+	Frame_Shift_Del	DEL	T	T	-	rs780658532	.	STAD		TCGA-BR-8059-01A-11D-2340-08	TCGA-BR-8059-10A-01D-2340-08	T	T	.	.	.	.	.	.	.	.	.	.	.	.	.	.	.	c.517delT	p.Trp173GlyfsTer8	p.W173Gfs*8	ENST00000373409	1/5	196	157	39	310	310	0	UGT1A4,frameshift_variant,p.Trp173GlyfsTer8,ENST00000373409,;UGT1A10,intron_variant,,ENST00000373445,;UGT1A6,intron_variant,,ENST00000305139,;UGT1A6,intron_variant,,ENST00000373424,;UGT1A8,intron_variant,,ENST00000608381,;UGT1A7,intron_variant,,ENST00000373426,;UGT1A8,intron_variant,,ENST00000609637,;UGT1A5,intron_variant,,ENST00000373414,;UGT1A6,intron_variant,,ENST00000406651,;UGT1A10,intron_va…	-	ENSG00000244474
UGT1A4	0	.	GRCh37	2	234681073	234681073	+	Silent	SNP	C	C	T	rs114123636	.	STAD		TCGA-BR-A4QL-01A-31D-A25D-08	TCGA-BR-A4QL-10A-01D-A25E-08	C	C	.	.	.	.	.	.	.	.	.	.	.	.	.	.	.	c.1473C>T	p.%3D	p.D491D	ENST00000373409	5/5	147	90	56	149	149	0	UGT1A4,synonymous_variant,p.%3D,ENST00000373409,;UGT1A6,synonymous_variant,p.%3D,ENST00000305139,;UGT1A3,synonymous_variant,p.%3D,ENST00000482026,;UGT1A6,synonymous_variant,p.%3D,ENST00000373424,;UGT1A8,synonymous_variant,p.%3D,ENST00000608383,;UGT1A8,synonymous_variant,p.%3D,ENST00000608381,;UGT1A7,synonymous_variant,p.%3D,ENST00000373426,;UGT1A8,synonymous_variant,p.%3D,ENST00000609637,;UGT1A8,…	T	ENSG00000244474
UGT1A4	0	.	GRCh37	2	234681146	234681146	+	Missense_Mutation	SNP	C	C	T	.	.	STAD		TCGA-CD-8535-01A-11D-2340-08	TCGA-CD-8535-10A-01D-2341-08	C	C	.	.	.	.	.	.	.	.	.	.	.	.	.	.	.	c.1546C>T	p.Arg516Trp	p.R516W	ENST00000373409	5/5	42	22	20	34	34	0	UGT1A4,missense_variant,p.Arg516Trp,ENST00000373409,;UGT1A6,missense_variant,p.Arg514Trp,ENST00000305139,;UGT1A3,missense_variant,p.Arg516Trp,ENST00000482026,;UGT1A6,missense_variant,p.Arg247Trp,ENST00000373424,;UGT1A8,missense_variant,p.Arg515Trp,ENST00000608383,;UGT1A8,missense_variant,p.Arg516Trp,ENST00000608381,;UGT1A7,missense_variant,p.Arg512Trp,ENST00000373426,;UGT1A8,missense_variant,p.Ar…	T	ENSG00000244474
UGT1A4	0	.	GRCh37	2	234627977	234627977	+	Frame_Shift_Del	DEL	T	T	-	rs780658532	.	STAD		TCGA-CD-8536-01A-11D-2340-08	TCGA-CD-8536-10A-01D-2341-08	T	T	.	.	.	.	.	.	.	.	.	.	.	.	.	.	.	c.517delT	p.Trp173GlyfsTer8	p.W173Gfs*8	ENST00000373409	1/5	408	299	109	266	266	0	UGT1A4,frameshift_variant,p.Trp173GlyfsTer8,ENST00000373409,;UGT1A10,intron_variant,,ENST00000373445,;UGT1A6,intron_variant,,ENST00000305139,;UGT1A6,intron_variant,,ENST00000373424,;UGT1A8,intron_variant,,ENST00000608381,;UGT1A7,intron_variant,,ENST00000373426,;UGT1A8,intron_variant,,ENST00000609637,;UGT1A5,intron_variant,,ENST00000373414,;UGT1A6,intron_variant,,ENST00000406651,;UGT1A10,intron_va…	-	ENSG00000244474
UGT1A4	0	.	GRCh37	2	234681161	234681161	+	Missense_Mutation	SNP	A	A	G	rs553499095	.	STAD		TCGA-CD-A4MI-01A-21D-A25D-08	TCGA-CD-A4MI-10A-01D-A25E-08	A	A	.	.	.	.	.	.	.	.	.	.	.	.	.	.	.	c.1561A>G	p.Lys521Glu	p.K521E	ENST00000373409	5/5	55	49	6	46	46	0	UGT1A4,missense_variant,p.Lys521Glu,ENST00000373409,;UGT1A6,missense_variant,p.Lys519Glu,ENST00000305139,;UGT1A3,missense_variant,p.Lys521Glu,ENST00000482026,;UGT1A6,missense_variant,p.Lys252Glu,ENST00000373424,;UGT1A8,missense_variant,p.Lys520Glu,ENST00000608383,;UGT1A8,missense_variant,p.Lys521Glu,ENST00000608381,;UGT1A7,missense_variant,p.Lys517Glu,ENST00000373426,;UGT1A8,missense_variant,p.Ly…	G	ENSG00000244474
UGT1A4	0	.	GRCh37	2	234627873	234627873	+	Missense_Mutation	SNP	C	C	T	.	.	STAD		TCGA-D7-A4YT-01A-11D-A25D-08	TCGA-D7-A4YT-10A-01D-A25E-08	C	C	.	.	.	.	.	.	.	.	.	.	.	.	.	.	.	c.407C>T	p.Ala136Val	p.A136V	ENST00000373409	1/5	220	144	76	274	274	0	UGT1A4,missense_variant,p.Ala136Val,ENST00000373409,;UGT1A10,intron_variant,,ENST00000373445,;UGT1A6,intron_variant,,ENST00000305139,;UGT1A6,intron_variant,,ENST00000373424,;UGT1A8,intron_variant,,ENST00000608381,;UGT1A7,intron_variant,,ENST00000373426,;UGT1A8,intron_variant,,ENST00000609637,;UGT1A5,intron_variant,,ENST00000373414,;UGT1A6,intron_variant,,ENST00000406651,;UGT1A10,intron_variant,,E…	T	ENSG00000244474
UGT1A4	0	.	GRCh37	2	234627977	234627977	+	Frame_Shift_Del	DEL	T	T	-	rs780658532	.	STAD		TCGA-D7-A4YV-01A-11D-A25D-08	TCGA-D7-A4YV-10A-01D-A25E-08	T	T	.	.	.	.	.	.	.	.	.	.	.	.	.	.	.	c.517delT	p.Trp173GlyfsTer8	p.W173Gfs*8	ENST00000373409	1/5	235	185	50	215	215	0	UGT1A4,frameshift_variant,p.Trp173GlyfsTer8,ENST00000373409,;UGT1A10,intron_variant,,ENST00000373445,;UGT1A6,intron_variant,,ENST00000305139,;UGT1A6,intron_variant,,ENST00000373424,;UGT1A8,intron_variant,,ENST00000608381,;UGT1A7,intron_variant,,ENST00000373426,;UGT1A8,intron_variant,,ENST00000609637,;UGT1A5,intron_variant,,ENST00000373414,;UGT1A6,intron_variant,,ENST00000406651,;UGT1A10,intron_va…	-	ENSG00000244474
UGT1A4	0	.	GRCh37	2	234627640	234627640	+	Silent	SNP	G	G	A	rs749212538,rs757477070	.	STAD		TCGA-HU-A4GQ-01A-11D-A25D-08	TCGA-HU-A4GQ-10A-01D-A25E-08	G	G	.	.	.	.	.	.	.	.	.	.	.	.	.	.	.	c.174G>A	p.%3D	p.A58A	ENST00000373409	1/5	56	42	13	64	64	0	UGT1A4,synonymous_variant,p.%3D,ENST00000373409,;UGT1A10,intron_variant,,ENST00000373445,;UGT1A6,intron_variant,,ENST00000305139,;UGT1A6,intron_variant,,ENST00000373424,;UGT1A8,intron_variant,,ENST00000608381,;UGT1A7,intron_variant,,ENST00000373426,;UGT1A8,intron_variant,,ENST00000609637,;UGT1A5,intron_variant,,ENST00000373414,;UGT1A6,intron_variant,,ENST00000406651,;UGT1A10,intron_variant,,ENST0…	A	ENSG00000244474
UGT1A4	0	.	GRCh37	2	234627599	234627599	+	Missense_Mutation	SNP	C	C	T	rs369434904	.	STAD		TCGA-HU-A4H3-01A-21D-A25D-08	TCGA-HU-A4H3-10A-01D-A25E-08	C	C	.	.	.	.	.	.	.	.	.	.	.	.	.	.	.	c.133C>T	p.Arg45Trp	p.R45W	ENST00000373409	1/5	61	44	17	81	81	0	UGT1A4,missense_variant,p.Arg45Trp,ENST00000373409,;UGT1A10,intron_variant,,ENST00000373445,;UGT1A6,intron_variant,,ENST00000305139,;UGT1A6,intron_variant,,ENST00000373424,;UGT1A8,intron_variant,,ENST00000608381,;UGT1A7,intron_variant,,ENST00000373426,;UGT1A8,intron_variant,,ENST00000609637,;UGT1A5,intron_variant,,ENST00000373414,;UGT1A6,intron_variant,,ENST00000406651,;UGT1A10,intron_variant,,EN…	T	ENSG00000244474
UGT1A4	0	.	GRCh37	2	234628145	234628145	+	Missense_Mutation	SNP	T	T	G	rs761613256	.	STAD		TCGA-VQ-A8DU-01A-11D-A364-08	TCGA-VQ-A8DU-10A-01D-A362-08	T	T	.	.	.	.	.	.	.	.	.	.	.	.	.	.	.	c.679T>G	p.Phe227Val	p.F227V	ENST00000373409	1/5	241	200	40	140	140	0	UGT1A4,missense_variant,p.Phe227Val,ENST00000373409,;UGT1A10,intron_variant,,ENST00000373445,;UGT1A6,intron_variant,,ENST00000305139,;UGT1A6,intron_variant,,ENST00000373424,;UGT1A8,intron_variant,,ENST00000608381,;UGT1A7,intron_variant,,ENST00000373426,;UGT1A8,intron_variant,,ENST00000609637,;UGT1A5,intron_variant,,ENST00000373414,;UGT1A6,intron_variant,,ENST00000406651,;UGT1A10,intron_variant,,E…	G	ENSG00000244474
UGT1A4	0	.	GRCh37	2	234627977	234627977	+	Frame_Shift_Del	DEL	T	T	-	rs780658532	.	STAD		TCGA-VQ-A8PP-01A-21D-A410-08	TCGA-VQ-A8PP-10A-01D-A413-08	T	T	.	.	.	.	.	.	.	.	.	.	.	.	.	.	.	c.517delT	p.Trp173GlyfsTer8	p.W173Gfs*8	ENST00000373409	1/5	244	187	57	203	203	0	UGT1A4,frameshift_variant,p.Trp173GlyfsTer8,ENST00000373409,;UGT1A10,intron_variant,,ENST00000373445,;UGT1A6,intron_variant,,ENST00000305139,;UGT1A6,intron_variant,,ENST00000373424,;UGT1A8,intron_variant,,ENST00000608381,;UGT1A7,intron_variant,,ENST00000373426,;UGT1A8,intron_variant,,ENST00000609637,;UGT1A5,intron_variant,,ENST00000373414,;UGT1A6,intron_variant,,ENST00000406651,;UGT1A10,intron_va…	-	ENSG00000244474
UGT1A4	0	.	GRCh37	2	234681161	234681161	+	Frame_Shift_Del	DEL	A	A	-	rs553499095	.	STAD		TCGA-VQ-A8PX-01A-12D-A410-08	TCGA-VQ-A8PX-10A-01D-A413-08	A	A	.	.	.	.	.	.	.	.	.	.	.	.	.	.	.	c.1566delA	p.Arg524GlufsTer22	p.R524Efs*22	ENST00000373409	5/5	47	35	12	43	43	0	UGT1A4,frameshift_variant,p.Arg524GlufsTer22,ENST00000373409,;UGT1A6,frameshift_variant,p.Arg522GlufsTer22,ENST00000305139,;UGT1A3,frameshift_variant,p.Arg524GlufsTer22,ENST00000482026,;UGT1A6,frameshift_variant,p.Arg255GlufsTer22,ENST00000373424,;UGT1A8,frameshift_variant,p.Arg523GlufsTer?,ENST00000608383,;UGT1A8,frameshift_variant,p.Arg524GlufsTer22,ENST00000608381,;UGT1A7,frameshift_variant,p.…	-	ENSG00000244474
UGT1A4	0	.	GRCh37	2	234681161	234681161	+	Frame_Shift_Del	DEL	A	A	-	rs553499095	.	STAD		TCGA-VQ-A924-01A-11D-A410-08	TCGA-VQ-A924-10A-01D-A413-08	A	A	.	.	.	.	.	.	.	.	.	.	.	.	.	.	.	c.1566delA	p.Arg524GlufsTer22	p.R524Efs*22	ENST00000373409	5/5	60	47	13	46	46	0	UGT1A4,frameshift_variant,p.Arg524GlufsTer22,ENST00000373409,;UGT1A6,frameshift_variant,p.Arg522GlufsTer22,ENST00000305139,;UGT1A3,frameshift_variant,p.Arg524GlufsTer22,ENST00000482026,;UGT1A6,frameshift_variant,p.Arg255GlufsTer22,ENST00000373424,;UGT1A8,frameshift_variant,p.Arg523GlufsTer?,ENST00000608383,;UGT1A8,frameshift_variant,p.Arg524GlufsTer22,ENST00000608381,;UGT1A7,frameshift_variant,p.…	-	ENSG00000244474
UGT1A4	0	.	GRCh37	2	234627585	234627585	+	Missense_Mutation	SNP	C	C	A	rs149017068	.	THAC		TCGA-EL-A3CU-01A-11D-A19J-08	TCGA-EL-A3CU-10A-01D-A19M-08	C	C	.	.	.	.	.	.	.	.	.	.	.	.	.	.	.	c.119C>A	p.Pro40His	p.P40H	ENST00000373409	1/5	49	45	4	41	41	0	UGT1A4,missense_variant,p.Pro40His,ENST00000373409,;UGT1A10,intron_variant,,ENST00000373445,;UGT1A6,intron_variant,,ENST00000305139,;UGT1A6,intron_variant,,ENST00000373424,;UGT1A8,intron_variant,,ENST00000608381,;UGT1A7,intron_variant,,ENST00000373426,;UGT1A8,intron_variant,,ENST00000609637,;UGT1A5,intron_variant,,ENST00000373414,;UGT1A6,intron_variant,,ENST00000406651,;UGT1A10,intron_variant,,EN…	A	ENSG00000244474
UGT1A4	0	.	GRCh37	2	234681014	234681014	+	Missense_Mutation	SNP	G	G	A	rs775532505	.	UCEC		TCGA-A5-A0VP-01A-21D-A10B-09	TCGA-A5-A0VP-10A-01D-A10B-09	G	G	.	.	.	.	.	.	.	.	.	.	.	.	.	.	.	c.1414G>A	p.Ala472Thr	p.A472T	ENST00000373409	5/5	68	41	27	102	102	0	UGT1A4,missense_variant,p.Ala472Thr,ENST00000373409,;UGT1A6,missense_variant,p.Ala470Thr,ENST00000305139,;UGT1A3,missense_variant,p.Ala472Thr,ENST00000482026,;UGT1A6,missense_variant,p.Ala203Thr,ENST00000373424,;UGT1A8,missense_variant,p.Ala471Thr,ENST00000608383,;UGT1A8,missense_variant,p.Ala472Thr,ENST00000608381,;UGT1A7,missense_variant,p.Ala468Thr,ENST00000373426,;UGT1A8,missense_variant,p.Al…	A	ENSG00000244474
UGT1A4	0	.	GRCh37	2	234627976	234627977	+	Frame_Shift_Ins	INS	-	-	T	.	.	UCEC		TCGA-AJ-A3BH-01A-11D-A19Y-09	TCGA-AJ-A3BH-10A-01D-A19Y-09	-	-	.	.	.	.	.	.	.	.	.	.	.	.	.	.	.	c.517dupT	p.Trp173LeufsTer7	p.W173Lfs*7	ENST00000373409	1/5	153	86	67	137	137	0	UGT1A4,frameshift_variant,p.Trp173LeufsTer7,ENST00000373409,;UGT1A10,intron_variant,,ENST00000373445,;UGT1A6,intron_variant,,ENST00000305139,;UGT1A6,intron_variant,,ENST00000373424,;UGT1A8,intron_variant,,ENST00000608381,;UGT1A7,intron_variant,,ENST00000373426,;UGT1A8,intron_variant,,ENST00000609637,;UGT1A5,intron_variant,,ENST00000373414,;UGT1A6,intron_variant,,ENST00000406651,;UGT1A10,intron_va…	T	ENSG00000244474
UGT1A4	0	.	GRCh37	2	234627977	234627977	+	Frame_Shift_Del	DEL	T	T	-	rs780658532	.	UCEC		TCGA-AJ-A3OJ-01A-11D-A228-09	TCGA-AJ-A3OJ-10A-01D-A22A-09	T	T	.	.	.	.	.	.	.	.	.	.	.	.	.	.	.	c.517delT	p.Trp173GlyfsTer8	p.W173Gfs*8	ENST00000373409	1/5	217	142	75	96	96	0	UGT1A4,frameshift_variant,p.Trp173GlyfsTer8,ENST00000373409,;UGT1A10,intron_variant,,ENST00000373445,;UGT1A6,intron_variant,,ENST00000305139,;UGT1A6,intron_variant,,ENST00000373424,;UGT1A8,intron_variant,,ENST00000608381,;UGT1A7,intron_variant,,ENST00000373426,;UGT1A8,intron_variant,,ENST00000609637,;UGT1A5,intron_variant,,ENST00000373414,;UGT1A6,intron_variant,,ENST00000406651,;UGT1A10,intron_va…	-	ENSG00000244474
UGT1A4	0	.	GRCh37	2	234627739	234627739	+	Silent	SNP	C	C	T	rs777889736	.	UCEC		TCGA-AP-A1E0-01A-11D-A135-09	TCGA-AP-A1E0-10A-01D-A135-09	C	C	.	.	.	.	.	.	.	.	.	.	.	.	.	.	.	c.273C>T	p.%3D	p.R91R	ENST00000373409	1/5	40	23	16	61	61	0	UGT1A4,synonymous_variant,p.%3D,ENST00000373409,;UGT1A10,intron_variant,,ENST00000373445,;UGT1A6,intron_variant,,ENST00000305139,;UGT1A6,intron_variant,,ENST00000373424,;UGT1A8,intron_variant,,ENST00000608381,;UGT1A7,intron_variant,,ENST00000373426,;UGT1A8,intron_variant,,ENST00000609637,;UGT1A5,intron_variant,,ENST00000373414,;UGT1A6,intron_variant,,ENST00000406651,;UGT1A10,intron_variant,,ENST0…	T	ENSG00000244474
UGT1A4	0	.	GRCh37	2	234627977	234627977	+	Frame_Shift_Del	DEL	T	T	-	rs780658532	.	UCEC		TCGA-AX-A2HA-01A-12D-A18P-09	TCGA-AX-A2HA-11A-11D-A18P-09	T	T	.	.	.	.	.	.	.	.	.	.	.	.	.	.	.	c.517delT	p.Trp173GlyfsTer8	p.W173Gfs*8	ENST00000373409	1/5	148	133	15	164	164	0	UGT1A4,frameshift_variant,p.Trp173GlyfsTer8,ENST00000373409,;UGT1A10,intron_variant,,ENST00000373445,;UGT1A6,intron_variant,,ENST00000305139,;UGT1A6,intron_variant,,ENST00000373424,;UGT1A8,intron_variant,,ENST00000608381,;UGT1A7,intron_variant,,ENST00000373426,;UGT1A8,intron_variant,,ENST00000609637,;UGT1A5,intron_variant,,ENST00000373414,;UGT1A6,intron_variant,,ENST00000406651,;UGT1A10,intron_va…	-	ENSG00000244474
UGT1A4	0	.	GRCh37	2	234627517	234627517	+	Silent	SNP	G	G	C	novel	.	UCEC		TCGA-AX-A2HJ-01A-11D-A17D-09	TCGA-AX-A2HJ-10A-01D-A17D-09	G	G	.	.	.	.	.	.	.	.	.	.	.	.	.	.	.	c.51G>C	p.%3D	p.L17L	ENST00000373409	1/5	61	34	27	43	43	0	UGT1A4,synonymous_variant,p.%3D,ENST00000373409,;UGT1A10,intron_variant,,ENST00000373445,;UGT1A6,intron_variant,,ENST00000305139,;UGT1A6,intron_variant,,ENST00000373424,;UGT1A8,intron_variant,,ENST00000608381,;UGT1A7,intron_variant,,ENST00000373426,;UGT1A8,intron_variant,,ENST00000609637,;UGT1A5,intron_variant,,ENST00000373414,;UGT1A6,intron_variant,,ENST00000406651,;UGT1A10,intron_variant,,ENST0…	C	ENSG00000244474
UGT1A4	0	.	GRCh37	2	234628144	234628144	+	Frame_Shift_Del	DEL	T	T	-	novel	.	UCEC		TCGA-AX-A3FS-01A-11D-A228-09	TCGA-AX-A3FS-10A-01D-A22A-09	T	T	.	.	.	.	.	.	.	.	.	.	.	.	.	.	.	c.682delT	p.Ser228LeufsTer35	p.S228Lfs*35	ENST00000373409	1/5	347	256	91	117	117	0	UGT1A4,frameshift_variant,p.Ser228LeufsTer35,ENST00000373409,;UGT1A10,intron_variant,,ENST00000373445,;UGT1A6,intron_variant,,ENST00000305139,;UGT1A6,intron_variant,,ENST00000373424,;UGT1A8,intron_variant,,ENST00000608381,;UGT1A7,intron_variant,,ENST00000373426,;UGT1A8,intron_variant,,ENST00000609637,;UGT1A5,intron_variant,,ENST00000373414,;UGT1A6,intron_variant,,ENST00000406651,;UGT1A10,intron_v…	-	ENSG00000244474
UGT1A4	0	.	GRCh37	2	234681288	234681288	+	3'UTR	SNP	T	T	C	novel	.	UCEC		TCGA-AX-A3FT-01A-11D-A228-09	TCGA-AX-A3FT-10A-01D-A22A-09	T	T	.	.	.	.	.	.	.	.	.	.	.	.	.	.	.	c.*83T>C	.	.	ENST00000373409	5/5	29	25	4	26	26	0	UGT1A4,3_prime_UTR_variant,,ENST00000373409,;UGT1A6,3_prime_UTR_variant,,ENST00000305139,;UGT1A3,3_prime_UTR_variant,,ENST00000482026,;UGT1A6,3_prime_UTR_variant,,ENST00000373424,;UGT1A8,3_prime_UTR_variant,,ENST00000608381,;UGT1A7,3_prime_UTR_variant,,ENST00000373426,;UGT1A8,3_prime_UTR_variant,,ENST00000609637,;UGT1A8,3_prime_UTR_variant,,ENST00000609767,;UGT1A5,3_prime_UTR_variant,,ENST0000037…	C	ENSG00000244474
UGT1A4	0	.	GRCh37	2	234681242	234681242	+	3'UTR	SNP	T	T	C	novel	.	UCEC		TCGA-BG-A0VX-01A-11D-A122-09	TCGA-BG-A0VX-10A-01D-A122-09	T	T	.	.	.	.	.	.	.	.	.	.	.	.	.	.	.	c.*37T>C	.	.	ENST00000373409	5/5	97	67	29	137	137	0	UGT1A4,3_prime_UTR_variant,,ENST00000373409,;UGT1A6,3_prime_UTR_variant,,ENST00000305139,;UGT1A3,3_prime_UTR_variant,,ENST00000482026,;UGT1A6,3_prime_UTR_variant,,ENST00000373424,;UGT1A8,3_prime_UTR_variant,,ENST00000608381,;UGT1A7,3_prime_UTR_variant,,ENST00000373426,;UGT1A8,3_prime_UTR_variant,,ENST00000609637,;UGT1A8,3_prime_UTR_variant,,ENST00000609767,;UGT1A5,3_prime_UTR_variant,,ENST0000037…	C	ENSG00000244474
UGT1A4	0	.	GRCh37	2	234681270	234681270	+	3'UTR	SNP	G	G	T	novel	.	UCEC		TCGA-D1-A17Q-01A-11D-A12J-09	TCGA-D1-A17Q-10A-01D-A12J-09	G	G	.	.	.	.	.	.	.	.	.	.	.	.	.	.	.	c.*65G>T	.	.	ENST00000373409	5/5	79	43	35	44	44	0	UGT1A4,3_prime_UTR_variant,,ENST00000373409,;UGT1A6,3_prime_UTR_variant,,ENST00000305139,;UGT1A3,3_prime_UTR_variant,,ENST00000482026,;UGT1A6,3_prime_UTR_variant,,ENST00000373424,;UGT1A8,3_prime_UTR_variant,,ENST00000608381,;UGT1A7,3_prime_UTR_variant,,ENST00000373426,;UGT1A8,3_prime_UTR_variant,,ENST00000609637,;UGT1A8,3_prime_UTR_variant,,ENST00000609767,;UGT1A5,3_prime_UTR_variant,,ENST0000037…	T	ENSG00000244474
UGT1A4	0	.	GRCh37	2	234627792	234627792	+	Missense_Mutation	SNP	G	G	T	novel	.	UCEC		TCGA-EO-A3AY-01A-12D-A19Y-09	TCGA-EO-A3AY-10A-01D-A19Y-09	G	G	.	.	.	.	.	.	.	.	.	.	.	.	.	.	.	c.326G>T	p.Arg109Ile	p.R109I	ENST00000373409	1/5	164	97	66	73	73	0	UGT1A4,missense_variant,p.Arg109Ile,ENST00000373409,;UGT1A10,intron_variant,,ENST00000373445,;UGT1A6,intron_variant,,ENST00000305139,;UGT1A6,intron_variant,,ENST00000373424,;UGT1A8,intron_variant,,ENST00000608381,;UGT1A7,intron_variant,,ENST00000373426,;UGT1A8,intron_variant,,ENST00000609637,;UGT1A5,intron_variant,,ENST00000373414,;UGT1A6,intron_variant,,ENST00000406651,;UGT1A10,intron_variant,,E…	T	ENSG00000244474
UGT1A4	0	.	GRCh37	2	234627825	234627825	+	Missense_Mutation	SNP	T	T	C	novel	.	UCEC		TCGA-EY-A1GD-01A-11D-A13L-09	TCGA-EY-A1GD-10A-01D-A13O-09	T	T	.	.	.	.	.	.	.	.	.	.	.	.	.	.	.	c.359T>C	p.Val120Ala	p.V120A	ENST00000373409	1/5	94	85	9	89	89	0	UGT1A4,missense_variant,p.Val120Ala,ENST00000373409,;UGT1A10,intron_variant,,ENST00000373445,;UGT1A6,intron_variant,,ENST00000305139,;UGT1A6,intron_variant,,ENST00000373424,;UGT1A8,intron_variant,,ENST00000608381,;UGT1A7,intron_variant,,ENST00000373426,;UGT1A8,intron_variant,,ENST00000609637,;UGT1A5,intron_variant,,ENST00000373414,;UGT1A6,intron_variant,,ENST00000406651,;UGT1A10,intron_variant,,E…	C	ENSG00000244474
UGT1A4	0	.	GRCh37	2	234627682	234627682	+	Missense_Mutation	SNP	G	G	T	rs148862762	.	UCEC		TCGA-EY-A1GI-01A-11D-A13L-09	TCGA-EY-A1GI-10A-01D-A13O-09	G	G	.	.	.	.	.	.	.	.	.	.	.	.	.	.	.	c.216G>T	p.Glu72Asp	p.E72D	ENST00000373409	1/5	39	21	17	72	72	0	UGT1A4,missense_variant,p.Glu72Asp,ENST00000373409,;UGT1A10,intron_variant,,ENST00000373445,;UGT1A6,intron_variant,,ENST00000305139,;UGT1A6,intron_variant,,ENST00000373424,;UGT1A8,intron_variant,,ENST00000608381,;UGT1A7,intron_variant,,ENST00000373426,;UGT1A8,intron_variant,,ENST00000609637,;UGT1A5,intron_variant,,ENST00000373414,;UGT1A6,intron_variant,,ENST00000406651,;UGT1A10,intron_variant,,EN…	T	ENSG00000244474
UGT1A4	0	.	GRCh37	2	234681295	234681295	+	3'UTR	SNP	C	C	A	novel	.	UCEC		TCGA-EY-A215-01A-11D-A14K-09	TCGA-EY-A215-10A-01D-A14K-09	C	C	.	.	.	.	.	.	.	.	.	.	.	.	.	.	.	c.*90C>A	.	.	ENST00000373409	5/5	15	8	7	30	30	0	UGT1A4,3_prime_UTR_variant,,ENST00000373409,;UGT1A6,3_prime_UTR_variant,,ENST00000305139,;UGT1A3,3_prime_UTR_variant,,ENST00000482026,;UGT1A6,3_prime_UTR_variant,,ENST00000373424,;UGT1A8,3_prime_UTR_variant,,ENST00000608381,;UGT1A7,3_prime_UTR_variant,,ENST00000373426,;UGT1A8,3_prime_UTR_variant,,ENST00000609637,;UGT1A8,3_prime_UTR_variant,,ENST00000609767,;UGT1A5,3_prime_UTR_variant,,ENST0000037…	A	ENSG00000244474
UGT1A4	0	.	GRCh37	2	234628129	234628129	+	Silent	SNP	C	C	A	novel	.	UCS		TCGA-N8-A4PP-01A-11D-A28R-08	TCGA-N8-A4PP-10A-01D-A28U-08	C	C	.	.	.	.	.	.	.	.	.	.	.	.	.	.	.	c.663C>A	p.%3D	p.S221S	ENST00000373409	1/5	217	189	28	202	201	1	UGT1A4,synonymous_variant,p.%3D,ENST00000373409,;UGT1A10,intron_variant,,ENST00000373445,;UGT1A6,intron_variant,,ENST00000305139,;UGT1A6,intron_variant,,ENST00000373424,;UGT1A8,intron_variant,,ENST00000608381,;UGT1A7,intron_variant,,ENST00000373426,;UGT1A8,intron_variant,,ENST00000609637,;UGT1A5,intron_variant,,ENST00000373414,;UGT1A6,intron_variant,,ENST00000406651,;UGT1A10,intron_variant,,ENST0…	A	ENSG00000244474
UGT1A5	0	.	GRCh37	2	234621950	234621950	+	Missense_Mutation	SNP	C	C	A	rs200200998	.	ACC		TCGA-OR-A5KB-01A-11D-A30A-10	TCGA-OR-A5KB-11A-11D-A30A-10	C	C	.	.	.	.	.	.	.	.	.	.	.	.	.	.	.	c.313C>A	p.His105Asn	p.H105N	ENST00000373414	1/5	111	76	34	123	123	0	UGT1A8,missense_variant,p.His105Asn,ENST00000608381,;UGT1A5,missense_variant,p.His105Asn,ENST00000373414,;UGT1A10,intron_variant,,ENST00000373445,;UGT1A6,intron_variant,,ENST00000305139,;UGT1A6,intron_variant,,ENST00000373424,;UGT1A7,intron_variant,,ENST00000373426,;UGT1A8,intron_variant,,ENST00000609637,;UGT1A6,intron_variant,,ENST00000406651,;UGT1A10,intron_variant,,ENST00000344644,;UGT1A8,intr…	A	ENSG00000240224
UGT1A5	0	.	GRCh37	2	234621931	234621931	+	Missense_Mutation	SNP	A	A	T	rs762192447	.	ACC		TCGA-OR-A5L6-01A-11D-A29I-10	TCGA-OR-A5L6-10C-01D-A29L-10	A	A	.	.	.	.	.	.	.	.	.	.	.	.	.	.	.	c.294A>T	p.Gln98His	p.Q98H	ENST00000373414	1/5	143	118	25	112	112	0	UGT1A8,missense_variant,p.Gln98His,ENST00000608381,;UGT1A5,missense_variant,p.Gln98His,ENST00000373414,;UGT1A10,intron_variant,,ENST00000373445,;UGT1A6,intron_variant,,ENST00000305139,;UGT1A6,intron_variant,,ENST00000373424,;UGT1A7,intron_variant,,ENST00000373426,;UGT1A8,intron_variant,,ENST00000609637,;UGT1A6,intron_variant,,ENST00000406651,;UGT1A10,intron_variant,,ENST00000344644,;UGT1A8,intron…	T	ENSG00000240224
UGT1A5	0	.	GRCh37	2	234622344	234622344	+	Missense_Mutation	SNP	C	C	G	.	.	BLCA		TCGA-BT-A20J-01A-11D-A14W-08	TCGA-BT-A20J-11A-11D-A14W-08	C	C	.	.	.	.	.	.	.	.	.	.	.	.	.	.	.	c.707C>G	p.Ser236Cys	p.S236C	ENST00000373414	1/5	215	174	41	271	271	0	UGT1A8,missense_variant,p.Ser236Cys,ENST00000608381,;UGT1A5,missense_variant,p.Ser236Cys,ENST00000373414,;UGT1A10,intron_variant,,ENST00000373445,;UGT1A6,intron_variant,,ENST00000305139,;UGT1A6,intron_variant,,ENST00000373424,;UGT1A7,intron_variant,,ENST00000373426,;UGT1A8,intron_variant,,ENST00000609637,;UGT1A6,intron_variant,,ENST00000406651,;UGT1A10,intron_variant,,ENST00000344644,;UGT1A8,intr…	G	ENSG00000240224
UGT1A5	0	.	GRCh37	2	234622156	234622158	+	In_Frame_Del	DEL	GAG	GAG	-	novel	.	BLCA		TCGA-CF-A9FM-01A-11D-A38G-08	TCGA-CF-A9FM-10A-01D-A38J-08	GAG	GAG	.	.	.	.	.	.	.	.	.	.	.	.	.	.	.	c.521_523delGGA	p.Arg174del	p.R174del	ENST00000373414	1/5	256	150	106	225	225	0	UGT1A8,inframe_deletion,p.Arg174del,ENST00000608381,;UGT1A5,inframe_deletion,p.Arg174del,ENST00000373414,;UGT1A10,intron_variant,,ENST00000373445,;UGT1A6,intron_variant,,ENST00000305139,;UGT1A6,intron_variant,,ENST00000373424,;UGT1A7,intron_variant,,ENST00000373426,;UGT1A8,intron_variant,,ENST00000609637,;UGT1A6,intron_variant,,ENST00000406651,;UGT1A10,intron_variant,,ENST00000344644,;UGT1A8,intr…	-	ENSG00000240224
UGT1A5	0	.	GRCh37	2	234621763	234621763	+	Silent	SNP	C	C	G	.	.	BLCA		TCGA-DK-A3WW-01A-22D-A23M-08	TCGA-DK-A3WW-10A-01D-A23K-08	C	C	.	.	.	.	.	.	.	.	.	.	.	.	.	.	.	c.126C>G	p.%3D	p.L42L	ENST00000373414	1/5	111	85	25	89	89	0	UGT1A8,synonymous_variant,p.%3D,ENST00000608381,;UGT1A5,synonymous_variant,p.%3D,ENST00000373414,;UGT1A10,intron_variant,,ENST00000373445,;UGT1A6,intron_variant,,ENST00000305139,;UGT1A6,intron_variant,,ENST00000373424,;UGT1A7,intron_variant,,ENST00000373426,;UGT1A8,intron_variant,,ENST00000609637,;UGT1A6,intron_variant,,ENST00000406651,;UGT1A10,intron_variant,,ENST00000344644,;UGT1A8,intron_varia…	G	ENSG00000240224
UGT1A5	0	.	GRCh37	2	234622089	234622089	+	Missense_Mutation	SNP	C	C	G	novel	.	BLCA		TCGA-E7-A85H-01A-11D-A34U-08	TCGA-E7-A85H-10B-01D-A34X-08	C	C	.	.	.	.	.	.	.	.	.	.	.	.	.	.	.	c.452C>G	p.Thr151Arg	p.T151R	ENST00000373414	1/5	345	221	123	270	270	0	UGT1A8,missense_variant,p.Thr151Arg,ENST00000608381,;UGT1A5,missense_variant,p.Thr151Arg,ENST00000373414,;UGT1A10,intron_variant,,ENST00000373445,;UGT1A6,intron_variant,,ENST00000305139,;UGT1A6,intron_variant,,ENST00000373424,;UGT1A7,intron_variant,,ENST00000373426,;UGT1A8,intron_variant,,ENST00000609637,;UGT1A6,intron_variant,,ENST00000406651,;UGT1A10,intron_variant,,ENST00000344644,;UGT1A8,intr…	G	ENSG00000240224
UGT1A5	0	.	GRCh37	2	234622085	234622085	+	Silent	SNP	C	C	T	rs28946886	.	BLCA		TCGA-K4-A6MB-01A-11D-A31L-08	TCGA-K4-A6MB-10A-01D-A31J-08	C	C	.	.	.	.	.	.	.	.	.	.	.	.	.	.	.	c.448C>T	p.%3D	p.L150L	ENST00000373414	1/5	156	98	57	210	210	0	UGT1A8,synonymous_variant,p.%3D,ENST00000608381,;UGT1A5,synonymous_variant,p.%3D,ENST00000373414,;UGT1A10,intron_variant,,ENST00000373445,;UGT1A6,intron_variant,,ENST00000305139,;UGT1A6,intron_variant,,ENST00000373424,;UGT1A7,intron_variant,,ENST00000373426,;UGT1A8,intron_variant,,ENST00000609637,;UGT1A6,intron_variant,,ENST00000406651,;UGT1A10,intron_variant,,ENST00000344644,;UGT1A8,intron_varia…	T	ENSG00000240224
UGT1A5	0	.	GRCh37	2	234622135	234622135	+	Silent	SNP	G	G	C	rs17868332	.	BLCA		TCGA-KQ-A41R-01A-21D-A34U-08	TCGA-KQ-A41R-10G-01D-A34X-08	G	G	.	.	.	.	.	.	.	.	.	.	.	.	.	.	.	c.498G>C	p.%3D	p.S166S	ENST00000373414	1/5	161	49	111	250	250	0	UGT1A8,synonymous_variant,p.%3D,ENST00000608381,;UGT1A5,synonymous_variant,p.%3D,ENST00000373414,;UGT1A10,intron_variant,,ENST00000373445,;UGT1A6,intron_variant,,ENST00000305139,;UGT1A6,intron_variant,,ENST00000373424,;UGT1A7,intron_variant,,ENST00000373426,;UGT1A8,intron_variant,,ENST00000609637,;UGT1A6,intron_variant,,ENST00000406651,;UGT1A10,intron_variant,,ENST00000344644,;UGT1A8,intron_varia…	C	ENSG00000240224
UGT1A5	0	.	GRCh37	2	234622410	234622410	+	Missense_Mutation	SNP	G	G	A	rs377333605	.	BRCA		TCGA-A7-A56D-01A-11D-A27P-09	TCGA-A7-A56D-10A-01D-A27P-09	G	G	.	.	.	.	.	.	.	.	.	.	.	.	.	.	.	c.773G>A	p.Arg258Gln	p.R258Q	ENST00000373414	1/5	100	93	7	81	81	0	UGT1A5,missense_variant,p.Arg258Gln,ENST00000373414,;UGT1A8,missense_variant,p.Arg258Gln,ENST00000608381,;UGT1A10,intron_variant,,ENST00000373445,;UGT1A6,intron_variant,,ENST00000305139,;UGT1A6,intron_variant,,ENST00000406651,;UGT1A6,intron_variant,,ENST00000373424,;UGT1A7,intron_variant,,ENST00000373426,;UGT1A8,intron_variant,,ENST00000373450,;UGT1A10,intron_variant,,ENST00000344644,;UGT1A8,intr…	A	ENSG00000240224
UGT1A5	0	.	GRCh37	2	234621857	234621857	+	Missense_Mutation	SNP	T	T	A	novel	.	BRCA		TCGA-A8-A09T-01A-11W-A019-09	TCGA-A8-A09T-10A-01W-A021-09	T	T	.	.	.	.	.	.	.	.	.	.	.	.	.	.	.	c.220T>A	p.Phe74Ile	p.F74I	ENST00000373414	1/5	192	185	7	139	139	0	UGT1A8,missense_variant,p.Phe74Ile,ENST00000608381,;UGT1A5,missense_variant,p.Phe74Ile,ENST00000373414,;UGT1A10,intron_variant,,ENST00000373445,;UGT1A6,intron_variant,,ENST00000305139,;UGT1A6,intron_variant,,ENST00000373424,;UGT1A7,intron_variant,,ENST00000373426,;UGT1A8,intron_variant,,ENST00000609637,;UGT1A6,intron_variant,,ENST00000406651,;UGT1A10,intron_variant,,ENST00000344644,;UGT1A8,intron…	A	ENSG00000240224
UGT1A5	0	.	GRCh37	2	234622145	234622145	+	Missense_Mutation	SNP	G	G	A	novel	.	BRCA		TCGA-AC-A23C-01A-12D-A167-09	TCGA-AC-A23C-10A-01D-A167-09	G	G	.	.	.	.	.	.	.	.	.	.	.	.	.	.	.	c.508G>A	p.Val170Met	p.V170M	ENST00000373414	1/5	79	71	8	77	77	0	UGT1A8,missense_variant,p.Val170Met,ENST00000608381,;UGT1A5,missense_variant,p.Val170Met,ENST00000373414,;UGT1A10,intron_variant,,ENST00000373445,;UGT1A6,intron_variant,,ENST00000305139,;UGT1A6,intron_variant,,ENST00000373424,;UGT1A7,intron_variant,,ENST00000373426,;UGT1A8,intron_variant,,ENST00000609637,;UGT1A6,intron_variant,,ENST00000406651,;UGT1A10,intron_variant,,ENST00000344644,;UGT1A8,intr…	A	ENSG00000240224
UGT1A5	0	.	GRCh37	2	234622270	234622270	+	Silent	SNP	C	C	A	.	.	BRCA		TCGA-E2-A1LH-01A-11D-A14G-09	TCGA-E2-A1LH-11A-22D-A14G-09	C	C	.	.	.	.	.	.	.	.	.	.	.	.	.	.	.	c.633C>A	p.%3D	p.V211V	ENST00000373414	1/5	184	156	28	140	140	0	UGT1A8,synonymous_variant,p.%3D,ENST00000608381,;UGT1A5,synonymous_variant,p.%3D,ENST00000373414,;UGT1A10,intron_variant,,ENST00000373445,;UGT1A6,intron_variant,,ENST00000305139,;UGT1A6,intron_variant,,ENST00000373424,;UGT1A7,intron_variant,,ENST00000373426,;UGT1A8,intron_variant,,ENST00000609637,;UGT1A6,intron_variant,,ENST00000406651,;UGT1A10,intron_variant,,ENST00000344644,;UGT1A8,intron_varia…	A	ENSG00000240224
UGT1A5	0	.	GRCh37	2	234621810	234621810	+	Missense_Mutation	SNP	T	T	C	rs577803036	.	CESC		TCGA-2W-A8YY-01A-11D-A37N-09	TCGA-2W-A8YY-10A-01D-A37N-09	T	T	.	.	.	.	.	.	.	.	.	.	.	.	.	.	.	c.173T>C	p.Val58Ala	p.V58A	ENST00000373414	1/5	39	18	20	31	31	0	UGT1A8,missense_variant,p.Val58Ala,ENST00000608381,;UGT1A5,missense_variant,p.Val58Ala,ENST00000373414,;UGT1A10,intron_variant,,ENST00000373445,;UGT1A6,intron_variant,,ENST00000305139,;UGT1A6,intron_variant,,ENST00000373424,;UGT1A7,intron_variant,,ENST00000373426,;UGT1A8,intron_variant,,ENST00000609637,;UGT1A6,intron_variant,,ENST00000406651,;UGT1A10,intron_variant,,ENST00000344644,;UGT1A8,intron…	C	ENSG00000240224
UGT1A5	0	.	GRCh37	2	234621956	234621956	+	Missense_Mutation	SNP	C	C	A	novel	.	CESC		TCGA-2W-A8YY-01A-11D-A37N-09	TCGA-2W-A8YY-10A-01D-A37N-09	C	C	.	.	.	.	.	.	.	.	.	.	.	.	.	.	.	c.319C>A	p.Leu107Met	p.L107M	ENST00000373414	1/5	68	38	30	56	56	0	UGT1A8,missense_variant,p.Leu107Met,ENST00000608381,;UGT1A5,missense_variant,p.Leu107Met,ENST00000373414,;UGT1A10,intron_variant,,ENST00000373445,;UGT1A6,intron_variant,,ENST00000305139,;UGT1A6,intron_variant,,ENST00000373424,;UGT1A7,intron_variant,,ENST00000373426,;UGT1A8,intron_variant,,ENST00000609637,;UGT1A6,intron_variant,,ENST00000406651,;UGT1A10,intron_variant,,ENST00000344644,;UGT1A8,intr…	A	ENSG00000240224
UGT1A5	0	.	GRCh37	2	234622208	234622208	+	Missense_Mutation	SNP	T	T	C	novel	.	CESC		TCGA-JW-A852-01A-11D-A351-09	TCGA-JW-A852-10A-01D-A351-09	T	T	.	.	.	.	.	.	.	.	.	.	.	.	.	.	.	c.571T>C	p.Ser191Pro	p.S191P	ENST00000373414	1/5	80	53	27	161	161	0	UGT1A8,missense_variant,p.Ser191Pro,ENST00000608381,;UGT1A5,missense_variant,p.Ser191Pro,ENST00000373414,;UGT1A10,intron_variant,,ENST00000373445,;UGT1A6,intron_variant,,ENST00000305139,;UGT1A6,intron_variant,,ENST00000373424,;UGT1A7,intron_variant,,ENST00000373426,;UGT1A8,intron_variant,,ENST00000609637,;UGT1A6,intron_variant,,ENST00000406651,;UGT1A10,intron_variant,,ENST00000344644,;UGT1A8,intr…	C	ENSG00000240224
UGT1A5	0	.	GRCh37	2	234621647	234621647	+	Nonsense_Mutation	SNP	G	G	T	novel	.	COAD		TCGA-A6-6781-01A-22D-A270-10	TCGA-A6-6781-10A-01D-A270-10	G	G	.	.	.	.	.	.	.	.	.	.	.	.	.	.	.	c.10G>T	p.Gly4Ter	p.G4*	ENST00000373414	1/5	84	67	16	96	96	0	UGT1A8,stop_gained,p.Gly4Ter,ENST00000608381,;UGT1A5,stop_gained,p.Gly4Ter,ENST00000373414,;UGT1A10,intron_variant,,ENST00000373445,;UGT1A6,intron_variant,,ENST00000305139,;UGT1A6,intron_variant,,ENST00000373424,;UGT1A7,intron_variant,,ENST00000373426,;UGT1A8,intron_variant,,ENST00000609637,;UGT1A6,intron_variant,,ENST00000406651,;UGT1A10,intron_variant,,ENST00000344644,;UGT1A8,intron_variant,,EN…	T	ENSG00000240224
UGT1A5	0	.	GRCh37	2	234621853	234621853	+	Missense_Mutation	SNP	G	G	T	rs757096232	.	COAD		TCGA-AA-3510-01A-01D-1408-10	TCGA-AA-3510-11A-01D-1408-10	G	G	.	.	.	.	.	.	.	.	.	.	.	.	.	.	.	c.216G>T	p.Glu72Asp	p.E72D	ENST00000373414	1/5	98	74	24	49	49	0	UGT1A8,missense_variant,p.Glu72Asp,ENST00000608381,;UGT1A5,missense_variant,p.Glu72Asp,ENST00000373414,;UGT1A10,intron_variant,,ENST00000373445,;UGT1A6,intron_variant,,ENST00000305139,;UGT1A6,intron_variant,,ENST00000373424,;UGT1A7,intron_variant,,ENST00000373426,;UGT1A8,intron_variant,,ENST00000609637,;UGT1A6,intron_variant,,ENST00000406651,;UGT1A10,intron_variant,,ENST00000344644,;UGT1A8,intron…	T	ENSG00000240224
UGT1A5	0	.	GRCh37	2	234621669	234621669	+	Missense_Mutation	SNP	A	A	G	rs576086579	.	COAD		TCGA-AA-3861-01A-01W-0995-10	TCGA-AA-3861-10A-01W-0995-10	A	A	.	.	.	.	.	.	.	.	.	.	.	.	.	.	.	c.32A>G	p.Gln11Arg	p.Q11R	ENST00000373414	1/5	196	181	14	26	25	1	UGT1A8,missense_variant,p.Gln11Arg,ENST00000608381,;UGT1A5,missense_variant,p.Gln11Arg,ENST00000373414,;UGT1A10,intron_variant,,ENST00000373445,;UGT1A6,intron_variant,,ENST00000305139,;UGT1A6,intron_variant,,ENST00000373424,;UGT1A7,intron_variant,,ENST00000373426,;UGT1A8,intron_variant,,ENST00000609637,;UGT1A6,intron_variant,,ENST00000406651,;UGT1A10,intron_variant,,ENST00000344644,;UGT1A8,intron…	G	ENSG00000240224
UGT1A5	0	.	GRCh37	2	234622166	234622166	+	Missense_Mutation	SNP	C	C	T	.	.	COAD		TCGA-AZ-6598-01A-11D-1771-10	TCGA-AZ-6598-11A-01D-1771-10	C	C	.	.	.	.	.	.	.	.	.	.	.	.	.	.	.	c.529C>T	p.Pro177Ser	p.P177S	ENST00000373414	1/5	341	221	120	226	226	0	UGT1A8,missense_variant,p.Pro177Ser,ENST00000608381,;UGT1A5,missense_variant,p.Pro177Ser,ENST00000373414,;UGT1A10,intron_variant,,ENST00000373445,;UGT1A6,intron_variant,,ENST00000305139,;UGT1A6,intron_variant,,ENST00000373424,;UGT1A7,intron_variant,,ENST00000373426,;UGT1A8,intron_variant,,ENST00000609637,;UGT1A6,intron_variant,,ENST00000406651,;UGT1A10,intron_variant,,ENST00000344644,;UGT1A8,intr…	T	ENSG00000240224
UGT1A5	0	.	GRCh37	2	234622332	234622332	+	Missense_Mutation	SNP	C	C	T	rs369685158,rs779646185	.	COAD		TCGA-CK-4951-01A-01D-1408-10	TCGA-CK-4951-10A-01D-2188-10	C	C	.	.	.	.	.	.	.	.	.	.	.	.	.	.	.	c.695C>T	p.Ala232Val	p.A232V	ENST00000373414	1/5	140	101	38	250	250	0	UGT1A8,missense_variant,p.Ala232Val,ENST00000608381,;UGT1A5,missense_variant,p.Ala232Val,ENST00000373414,;UGT1A10,intron_variant,,ENST00000373445,;UGT1A6,intron_variant,,ENST00000305139,;UGT1A6,intron_variant,,ENST00000373424,;UGT1A7,intron_variant,,ENST00000373426,;UGT1A8,intron_variant,,ENST00000609637,;UGT1A6,intron_variant,,ENST00000406651,;UGT1A10,intron_variant,,ENST00000344644,;UGT1A8,intr…	T	ENSG00000240224
UGT1A5	0	.	GRCh37	2	234622057	234622057	+	Silent	SNP	C	C	T	novel	.	ESCA		TCGA-2H-A9GR-01A-12D-A37C-09	TCGA-2H-A9GR-11A-11D-A37F-09	C	C	.	.	.	.	.	.	.	.	.	.	.	.	.	.	.	c.420C>T	p.%3D	p.H140H	ENST00000373414	1/5	91	80	11	88	88	0	UGT1A8,synonymous_variant,p.%3D,ENST00000608381,;UGT1A5,synonymous_variant,p.%3D,ENST00000373414,;UGT1A10,intron_variant,,ENST00000373445,;UGT1A6,intron_variant,,ENST00000305139,;UGT1A6,intron_variant,,ENST00000373424,;UGT1A7,intron_variant,,ENST00000373426,;UGT1A8,intron_variant,,ENST00000609637,;UGT1A6,intron_variant,,ENST00000406651,;UGT1A10,intron_variant,,ENST00000344644,;UGT1A8,intron_varia…	T	ENSG00000240224
UGT1A5	0	.	GRCh37	2	234622316	234622316	+	Missense_Mutation	SNP	G	G	T	rs200994534	.	ESCA		TCGA-V5-AASV-01A-11D-A387-09	TCGA-V5-AASV-10A-01D-A38A-09	G	G	.	.	.	.	.	.	.	.	.	.	.	.	.	.	.	c.679G>T	p.Val227Phe	p.V227F	ENST00000373414	1/5	179	78	100	134	134	0	UGT1A8,missense_variant,p.Val227Phe,ENST00000608381,;UGT1A5,missense_variant,p.Val227Phe,ENST00000373414,;UGT1A10,intron_variant,,ENST00000373445,;UGT1A6,intron_variant,,ENST00000305139,;UGT1A6,intron_variant,,ENST00000373424,;UGT1A7,intron_variant,,ENST00000373426,;UGT1A8,intron_variant,,ENST00000609637,;UGT1A6,intron_variant,,ENST00000406651,;UGT1A10,intron_variant,,ENST00000344644,;UGT1A8,intr…	T	ENSG00000240224
UGT1A5	0	.	GRCh37	2	234621856	234621856	+	Silent	SNP	C	C	T	rs17874940	.	GBM		TCGA-06-0145-01A-01D-1490-08	TCGA-06-0145-10A-01D-1490-08	C	C	.	.	.	.	.	.	.	.	.	.	.	.	.	.	.	c.219C>T	p.%3D	p.N73N	ENST00000373414	1/5	147	97	50	179	179	0	UGT1A8,synonymous_variant,p.%3D,ENST00000608381,;UGT1A5,synonymous_variant,p.%3D,ENST00000373414,;UGT1A10,intron_variant,,ENST00000373445,;UGT1A6,intron_variant,,ENST00000305139,;UGT1A6,intron_variant,,ENST00000373424,;UGT1A7,intron_variant,,ENST00000373426,;UGT1A8,intron_variant,,ENST00000609637,;UGT1A6,intron_variant,,ENST00000406651,;UGT1A10,intron_variant,,ENST00000344644,;UGT1A8,intron_varia…	T	ENSG00000240224
UGT1A5	0	.	GRCh37	2	234621836	234621836	+	Missense_Mutation	SNP	A	A	G	novel	.	HNSC		TCGA-CR-6491-01A-11D-1870-08	TCGA-CR-6491-10A-01D-1870-08	A	A	.	.	.	.	.	.	.	.	.	.	.	.	.	.	.	c.199A>G	p.Met67Val	p.M67V	ENST00000373414	1/5	75	51	24	106	106	0	UGT1A8,missense_variant,p.Met67Val,ENST00000608381,;UGT1A5,missense_variant,p.Met67Val,ENST00000373414,;UGT1A10,intron_variant,,ENST00000373445,;UGT1A6,intron_variant,,ENST00000305139,;UGT1A6,intron_variant,,ENST00000373424,;UGT1A7,intron_variant,,ENST00000373426,;UGT1A8,intron_variant,,ENST00000609637,;UGT1A6,intron_variant,,ENST00000406651,;UGT1A10,intron_variant,,ENST00000344644,;UGT1A8,intron…	G	ENSG00000240224
UGT1A5	0	.	GRCh37	2	234622174	234622174	+	Silent	SNP	T	T	C	novel	.	HNSC		TCGA-QK-A8ZA-01A-11D-A391-08	TCGA-QK-A8ZA-10A-01D-A394-08	T	T	.	.	.	.	.	.	.	.	.	.	.	.	.	.	.	c.537T>C	p.%3D	p.D179D	ENST00000373414	1/5	199	86	113	177	177	0	UGT1A8,synonymous_variant,p.%3D,ENST00000608381,;UGT1A5,synonymous_variant,p.%3D,ENST00000373414,;UGT1A10,intron_variant,,ENST00000373445,;UGT1A6,intron_variant,,ENST00000305139,;UGT1A6,intron_variant,,ENST00000373424,;UGT1A7,intron_variant,,ENST00000373426,;UGT1A8,intron_variant,,ENST00000609637,;UGT1A6,intron_variant,,ENST00000406651,;UGT1A10,intron_variant,,ENST00000344644,;UGT1A8,intron_varia…	C	ENSG00000240224
UGT1A5	0	.	GRCh37	2	234621862	234621862	+	Silent	SNP	C	C	T	novel	.	HNSC		TCGA-TN-A7HL-01A-11D-A34J-08	TCGA-TN-A7HL-10A-01D-A34M-08	C	C	.	.	.	.	.	.	.	.	.	.	.	.	.	.	.	c.225C>T	p.%3D	p.F75F	ENST00000373414	1/5	183	148	35	104	103	1	UGT1A8,synonymous_variant,p.%3D,ENST00000608381,;UGT1A5,synonymous_variant,p.%3D,ENST00000373414,;UGT1A10,intron_variant,,ENST00000373445,;UGT1A6,intron_variant,,ENST00000305139,;UGT1A6,intron_variant,,ENST00000373424,;UGT1A7,intron_variant,,ENST00000373426,;UGT1A8,intron_variant,,ENST00000609637,;UGT1A6,intron_variant,,ENST00000406651,;UGT1A10,intron_variant,,ENST00000344644,;UGT1A8,intron_varia…	T	ENSG00000240224
UGT1A5	0	.	GRCh37	2	234621902	234621902	+	Missense_Mutation	SNP	T	T	A	novel	.	KIRP		TCGA-2Z-A9JL-01A-11D-A42J-10	TCGA-2Z-A9JL-10A-01D-A42M-10	T	T	.	.	.	.	.	.	.	.	.	.	.	.	.	.	.	c.265T>A	p.Phe89Ile	p.F89I	ENST00000373414	1/5	69	37	32	99	99	0	UGT1A8,missense_variant,p.Phe89Ile,ENST00000608381,;UGT1A5,missense_variant,p.Phe89Ile,ENST00000373414,;UGT1A10,intron_variant,,ENST00000373445,;UGT1A6,intron_variant,,ENST00000305139,;UGT1A6,intron_variant,,ENST00000373424,;UGT1A7,intron_variant,,ENST00000373426,;UGT1A8,intron_variant,,ENST00000609637,;UGT1A6,intron_variant,,ENST00000406651,;UGT1A10,intron_variant,,ENST00000344644,;UGT1A8,intron…	A	ENSG00000240224
UGT1A5	0	.	GRCh37	2	234622277	234622277	+	Missense_Mutation	SNP	A	A	G	.	.	KIRP		TCGA-G7-6795-01A-11D-1961-08	TCGA-G7-6795-10A-01D-1962-08	A	A	.	.	.	.	.	.	.	.	.	.	.	.	.	.	.	c.640A>G	p.Met214Val	p.M214V	ENST00000373414	1/5	335	155	180	318	318	0	UGT1A8,missense_variant,p.Met214Val,ENST00000608381,;UGT1A5,missense_variant,p.Met214Val,ENST00000373414,;UGT1A10,intron_variant,,ENST00000373445,;UGT1A6,intron_variant,,ENST00000305139,;UGT1A6,intron_variant,,ENST00000373424,;UGT1A7,intron_variant,,ENST00000373426,;UGT1A8,intron_variant,,ENST00000609637,;UGT1A6,intron_variant,,ENST00000406651,;UGT1A10,intron_variant,,ENST00000344644,;UGT1A8,intr…	G	ENSG00000240224
UGT1A5	0	.	GRCh37	2	234622434	234622434	+	Missense_Mutation	SNP	C	C	G	novel	.	KIRP		TCGA-SX-A71S-01A-11D-A33Q-10	TCGA-SX-A71S-10A-01D-A33Q-10	C	C	.	.	.	.	.	.	.	.	.	.	.	.	.	.	.	c.797C>G	p.Pro266Arg	p.P266R	ENST00000373414	1/5	63	27	36	94	94	0	UGT1A8,missense_variant,p.Pro266Arg,ENST00000608381,;UGT1A5,missense_variant,p.Pro266Arg,ENST00000373414,;UGT1A10,intron_variant,,ENST00000373445,;UGT1A6,intron_variant,,ENST00000305139,;UGT1A6,intron_variant,,ENST00000373424,;UGT1A7,intron_variant,,ENST00000373426,;UGT1A8,intron_variant,,ENST00000609637,;UGT1A6,intron_variant,,ENST00000406651,;UGT1A10,intron_variant,,ENST00000344644,;UGT1A8,intr…	G	ENSG00000240224
UGT1A5	0	.	GRCh37	2	234622288	234622288	+	Silent	SNP	T	T	G	novel	.	KIRP		TCGA-SX-A71U-01A-12D-A33Q-10	TCGA-SX-A71U-10A-01D-A33Q-10	T	T	.	.	.	.	.	.	.	.	.	.	.	.	.	.	.	c.651T>G	p.%3D	p.P217P	ENST00000373414	1/5	96	60	35	100	100	0	UGT1A8,synonymous_variant,p.%3D,ENST00000608381,;UGT1A5,synonymous_variant,p.%3D,ENST00000373414,;UGT1A10,intron_variant,,ENST00000373445,;UGT1A6,intron_variant,,ENST00000305139,;UGT1A6,intron_variant,,ENST00000373424,;UGT1A7,intron_variant,,ENST00000373426,;UGT1A8,intron_variant,,ENST00000609637,;UGT1A6,intron_variant,,ENST00000406651,;UGT1A10,intron_variant,,ENST00000344644,;UGT1A8,intron_varia…	G	ENSG00000240224
UGT1A5	0	.	GRCh37	2	234622261	234622261	+	Silent	SNP	G	G	A	rs374147519	.	LAML		TCGA-AB-2826-03B-01W-0728-08	TCGA-AB-2826-11B-01W-0728-08	G	G	.	.	.	.	.	.	.	.	.	.	.	.	.	.	.	c.624G>A	p.%3D	p.L208L	ENST00000373414	1/5	905	861	44	1042	1041	1	UGT1A8,synonymous_variant,p.%3D,ENST00000608381,;UGT1A5,synonymous_variant,p.%3D,ENST00000373414,;UGT1A10,intron_variant,,ENST00000373445,;UGT1A6,intron_variant,,ENST00000305139,;UGT1A6,intron_variant,,ENST00000373424,;UGT1A7,intron_variant,,ENST00000373426,;UGT1A8,intron_variant,,ENST00000609637,;UGT1A6,intron_variant,,ENST00000406651,;UGT1A10,intron_variant,,ENST00000344644,;UGT1A8,intron_varia…	A	ENSG00000240224
UGT1A5	0	.	GRCh37	2	234622136	234622136	+	Missense_Mutation	SNP	A	A	T	.	.	LGG		TCGA-DU-7306-01A-11D-2086-08	TCGA-DU-7306-10A-01D-2086-08	A	A	.	.	.	.	.	.	.	.	.	.	.	.	.	.	.	c.499A>T	p.Ile167Phe	p.I167F	ENST00000373414	1/5	267	258	9	286	286	0	UGT1A8,missense_variant,p.Ile167Phe,ENST00000608381,;UGT1A5,missense_variant,p.Ile167Phe,ENST00000373414,;UGT1A10,intron_variant,,ENST00000373445,;UGT1A6,intron_variant,,ENST00000305139,;UGT1A6,intron_variant,,ENST00000373424,;UGT1A7,intron_variant,,ENST00000373426,;UGT1A8,intron_variant,,ENST00000609637,;UGT1A6,intron_variant,,ENST00000406651,;UGT1A10,intron_variant,,ENST00000344644,;UGT1A8,intr…	T	ENSG00000240224
UGT1A5	0	.	GRCh37	2	234622090	234622090	+	Silent	SNP	A	A	G	novel	.	LIHC		TCGA-G3-A5SM-01A-12D-A28X-10	TCGA-G3-A5SM-10A-01D-A28X-10	A	A	.	.	.	.	.	.	.	.	.	.	.	.	.	.	.	c.453A>G	p.%3D	p.T151T	ENST00000373414	1/5	250	243	7	251	251	0	UGT1A8,synonymous_variant,p.%3D,ENST00000608381,;UGT1A5,synonymous_variant,p.%3D,ENST00000373414,;UGT1A10,intron_variant,,ENST00000373445,;UGT1A6,intron_variant,,ENST00000305139,;UGT1A6,intron_variant,,ENST00000373424,;UGT1A7,intron_variant,,ENST00000373426,;UGT1A8,intron_variant,,ENST00000609637,;UGT1A6,intron_variant,,ENST00000406651,;UGT1A10,intron_variant,,ENST00000344644,;UGT1A8,intron_varia…	G	ENSG00000240224
UGT1A5	0	.	GRCh37	2	234622156	234622156	+	Missense_Mutation	SNP	G	G	T	.	.	LUAD		TCGA-44-8119-01A-11D-2238-08	TCGA-44-8119-10A-01D-2238-08	G	G	.	.	.	.	.	.	.	.	.	.	.	.	.	.	.	c.519G>T	p.Leu173Phe	p.L173F	ENST00000373414	1/5	128	100	27	215	215	0	UGT1A8,missense_variant,p.Leu173Phe,ENST00000608381,;UGT1A5,missense_variant,p.Leu173Phe,ENST00000373414,;UGT1A10,intron_variant,,ENST00000373445,;UGT1A6,intron_variant,,ENST00000305139,;UGT1A6,intron_variant,,ENST00000373424,;UGT1A7,intron_variant,,ENST00000373426,;UGT1A8,intron_variant,,ENST00000609637,;UGT1A6,intron_variant,,ENST00000406651,;UGT1A10,intron_variant,,ENST00000344644,;UGT1A8,intr…	T	ENSG00000240224
UGT1A5	0	.	GRCh37	2	234622111	234622111	+	Silent	SNP	G	G	T	rs147117995	.	LUAD		TCGA-55-6985-01A-11D-1945-08	TCGA-55-6985-11A-01D-1945-08	G	G	.	.	.	.	.	.	.	.	.	.	.	.	.	.	.	c.474G>T	p.%3D	p.A158A	ENST00000373414	1/5	124	94	30	139	139	0	UGT1A8,synonymous_variant,p.%3D,ENST00000608381,;UGT1A5,synonymous_variant,p.%3D,ENST00000373414,;UGT1A10,intron_variant,,ENST00000373445,;UGT1A6,intron_variant,,ENST00000305139,;UGT1A6,intron_variant,,ENST00000373424,;UGT1A7,intron_variant,,ENST00000373426,;UGT1A8,intron_variant,,ENST00000609637,;UGT1A6,intron_variant,,ENST00000406651,;UGT1A10,intron_variant,,ENST00000344644,;UGT1A8,intron_varia…	T	ENSG00000240224
UGT1A5	0	.	GRCh37	2	234622209	234622209	+	Missense_Mutation	SNP	C	C	G	rs267599272	.	LUAD		TCGA-55-7574-01A-11D-2036-08	TCGA-55-7574-10A-01D-2036-08	C	C	.	.	.	.	.	.	.	.	.	.	.	.	.	.	.	c.572C>G	p.Ser191Cys	p.S191C	ENST00000373414	1/5	221	207	14	195	195	0	UGT1A8,missense_variant,p.Ser191Cys,ENST00000608381,;UGT1A5,missense_variant,p.Ser191Cys,ENST00000373414,;UGT1A10,intron_variant,,ENST00000373445,;UGT1A6,intron_variant,,ENST00000305139,;UGT1A6,intron_variant,,ENST00000373424,;UGT1A7,intron_variant,,ENST00000373426,;UGT1A8,intron_variant,,ENST00000609637,;UGT1A6,intron_variant,,ENST00000406651,;UGT1A10,intron_variant,,ENST00000344644,;UGT1A8,intr…	G	ENSG00000240224
UGT1A5	0	.	GRCh37	2	234621740	234621740	+	Frame_Shift_Del	DEL	C	C	-	novel	.	LUAD		TCGA-55-7907-01A-11D-2167-08	TCGA-55-7907-10A-01D-2167-08	C	C	.	.	.	.	.	.	.	.	.	.	.	.	.	.	.	c.105delC	p.Thr36LeufsTer30	p.T36Lfs*30	ENST00000373414	1/5	39	34	5	35	35	0	UGT1A8,frameshift_variant,p.Thr36LeufsTer30,ENST00000608381,;UGT1A5,frameshift_variant,p.Thr36LeufsTer30,ENST00000373414,;UGT1A10,intron_variant,,ENST00000373445,;UGT1A6,intron_variant,,ENST00000305139,;UGT1A6,intron_variant,,ENST00000373424,;UGT1A7,intron_variant,,ENST00000373426,;UGT1A8,intron_variant,,ENST00000609637,;UGT1A6,intron_variant,,ENST00000406651,;UGT1A10,intron_variant,,ENST00000344…	-	ENSG00000240224
UGT1A5	0	.	GRCh37	2	234622322	234622322	+	Missense_Mutation	SNP	G	G	T	novel	.	LUAD		TCGA-55-8092-01A-11D-2238-08	TCGA-55-8092-10A-01D-2238-08	G	G	.	.	.	.	.	.	.	.	.	.	.	.	.	.	.	c.685G>T	p.Ala229Ser	p.A229S	ENST00000373414	1/5	351	304	47	273	273	0	UGT1A8,missense_variant,p.Ala229Ser,ENST00000608381,;UGT1A5,missense_variant,p.Ala229Ser,ENST00000373414,;UGT1A10,intron_variant,,ENST00000373445,;UGT1A6,intron_variant,,ENST00000305139,;UGT1A6,intron_variant,,ENST00000373424,;UGT1A7,intron_variant,,ENST00000373426,;UGT1A8,intron_variant,,ENST00000609637,;UGT1A6,intron_variant,,ENST00000406651,;UGT1A10,intron_variant,,ENST00000344644,;UGT1A8,intr…	T	ENSG00000240224
UGT1A5	0	.	GRCh37	2	234621866	234621866	+	Missense_Mutation	SNP	C	C	A	novel	.	LUAD		TCGA-55-8506-01A-11D-2393-08	TCGA-55-8506-10A-01D-2393-08	C	C	.	.	.	.	.	.	.	.	.	.	.	.	.	.	.	c.229C>A	p.Leu77Met	p.L77M	ENST00000373414	1/5	78	51	26	167	167	0	UGT1A8,missense_variant,p.Leu77Met,ENST00000608381,;UGT1A5,missense_variant,p.Leu77Met,ENST00000373414,;UGT1A10,intron_variant,,ENST00000373445,;UGT1A6,intron_variant,,ENST00000305139,;UGT1A6,intron_variant,,ENST00000373424,;UGT1A7,intron_variant,,ENST00000373426,;UGT1A8,intron_variant,,ENST00000609637,;UGT1A6,intron_variant,,ENST00000406651,;UGT1A10,intron_variant,,ENST00000344644,;UGT1A8,intron…	A	ENSG00000240224
UGT1A5	0	.	GRCh37	2	234622397	234622397	+	Missense_Mutation	SNP	G	G	A	novel	.	LUAD		TCGA-55-8506-01A-11D-2393-08	TCGA-55-8506-10A-01D-2393-08	G	G	.	.	.	.	.	.	.	.	.	.	.	.	.	.	.	c.760G>A	p.Val254Met	p.V254M	ENST00000373414	1/5	306	203	102	421	420	1	UGT1A5,missense_variant,p.Val254Met,ENST00000373414,;UGT1A8,missense_variant,p.Val254Met,ENST00000608381,;UGT1A10,intron_variant,,ENST00000373445,;UGT1A6,intron_variant,,ENST00000305139,;UGT1A6,intron_variant,,ENST00000406651,;UGT1A6,intron_variant,,ENST00000373424,;UGT1A7,intron_variant,,ENST00000373426,;UGT1A8,intron_variant,,ENST00000373450,;UGT1A10,intron_variant,,ENST00000344644,;UGT1A8,intr…	A	ENSG00000240224
UGT1A5	0	.	GRCh37	2	234621904	234621904	+	Missense_Mutation	SNP	T	T	A	novel	.	LUAD		TCGA-55-A492-01A-11D-A24D-08	TCGA-55-A492-10A-01D-A24F-08	T	T	.	.	.	.	.	.	.	.	.	.	.	.	.	.	.	c.267T>A	p.Phe89Leu	p.F89L	ENST00000373414	1/5	117	105	12	141	141	0	UGT1A8,missense_variant,p.Phe89Leu,ENST00000608381,;UGT1A5,missense_variant,p.Phe89Leu,ENST00000373414,;UGT1A10,intron_variant,,ENST00000373445,;UGT1A6,intron_variant,,ENST00000305139,;UGT1A6,intron_variant,,ENST00000373424,;UGT1A7,intron_variant,,ENST00000373426,;UGT1A8,intron_variant,,ENST00000609637,;UGT1A6,intron_variant,,ENST00000406651,;UGT1A10,intron_variant,,ENST00000344644,;UGT1A8,intron…	A	ENSG00000240224
UGT1A5	0	.	GRCh37	2	234622244	234622244	+	Missense_Mutation	SNP	G	G	C	novel	.	LUAD		TCGA-62-A46U-01A-11D-A24D-08	TCGA-62-A46U-10A-01D-A24F-08	G	G	.	.	.	.	.	.	.	.	.	.	.	.	.	.	.	c.607G>C	p.Asp203His	p.D203H	ENST00000373414	1/5	211	193	18	194	194	0	UGT1A8,missense_variant,p.Asp203His,ENST00000608381,;UGT1A5,missense_variant,p.Asp203His,ENST00000373414,;UGT1A10,intron_variant,,ENST00000373445,;UGT1A6,intron_variant,,ENST00000305139,;UGT1A6,intron_variant,,ENST00000373424,;UGT1A7,intron_variant,,ENST00000373426,;UGT1A8,intron_variant,,ENST00000609637,;UGT1A6,intron_variant,,ENST00000406651,;UGT1A10,intron_variant,,ENST00000344644,;UGT1A8,intr…	C	ENSG00000240224
UGT1A5	0	.	GRCh37	2	234622444	234622444	+	Silent	SNP	C	C	A	.	.	LUAD		TCGA-78-7162-01A-21D-2063-08	TCGA-78-7162-11A-01D-2063-08	C	C	.	.	.	.	.	.	.	.	.	.	.	.	.	.	.	c.807C>A	p.%3D	p.I269I	ENST00000373414	1/5	237	194	43	195	195	0	UGT1A8,synonymous_variant,p.%3D,ENST00000608381,;UGT1A5,synonymous_variant,p.%3D,ENST00000373414,;UGT1A10,intron_variant,,ENST00000373445,;UGT1A6,intron_variant,,ENST00000305139,;UGT1A6,intron_variant,,ENST00000373424,;UGT1A7,intron_variant,,ENST00000373426,;UGT1A8,intron_variant,,ENST00000609637,;UGT1A6,intron_variant,,ENST00000406651,;UGT1A10,intron_variant,,ENST00000344644,;UGT1A8,intron_varia…	A	ENSG00000240224
UGT1A5	0	.	GRCh37	2	234622463	234622463	+	Missense_Mutation	SNP	A	A	T	rs776318563	.	LUAD		TCGA-78-7166-01A-12D-2063-08	TCGA-78-7166-11A-01D-2063-08	A	A	.	.	.	.	.	.	.	.	.	.	.	.	.	.	.	c.826A>T	p.Ile276Phe	p.I276F	ENST00000373414	1/5	170	116	54	185	185	0	UGT1A8,missense_variant,p.Ile276Phe,ENST00000608381,;UGT1A5,missense_variant,p.Ile276Phe,ENST00000373414,;UGT1A10,intron_variant,,ENST00000373445,;UGT1A6,intron_variant,,ENST00000305139,;UGT1A6,intron_variant,,ENST00000373424,;UGT1A7,intron_variant,,ENST00000373426,;UGT1A8,intron_variant,,ENST00000609637,;UGT1A6,intron_variant,,ENST00000406651,;UGT1A10,intron_variant,,ENST00000344644,;UGT1A8,intr…	T	ENSG00000240224
UGT1A5	0	.	GRCh37	2	234621783	234621783	+	Missense_Mutation	SNP	G	G	A	rs369417360	.	LUSC		TCGA-37-3792-01A-01D-0983-08	TCGA-37-3792-10A-01D-0983-08	G	G	.	.	.	.	.	.	.	.	.	.	.	.	.	.	.	c.146G>A	p.Arg49Gln	p.R49Q	ENST00000373414	1/5	32	24	8	42	42	0	UGT1A8,missense_variant,p.Arg49Gln,ENST00000608381,;UGT1A5,missense_variant,p.Arg49Gln,ENST00000373414,;UGT1A10,intron_variant,,ENST00000373445,;UGT1A6,intron_variant,,ENST00000305139,;UGT1A6,intron_variant,,ENST00000373424,;UGT1A7,intron_variant,,ENST00000373426,;UGT1A8,intron_variant,,ENST00000609637,;UGT1A6,intron_variant,,ENST00000406651,;UGT1A10,intron_variant,,ENST00000344644,;UGT1A8,intron…	A	ENSG00000240224
UGT1A5	0	.	GRCh37	2	234622095	234622095	+	Missense_Mutation	SNP	C	C	G	novel	.	LUSC		TCGA-58-A46M-01A-11D-A24D-08	TCGA-58-A46M-10A-01D-A24F-08	C	C	.	.	.	.	.	.	.	.	.	.	.	.	.	.	.	c.458C>G	p.Pro153Arg	p.P153R	ENST00000373414	1/5	241	202	39	245	245	0	UGT1A8,missense_variant,p.Pro153Arg,ENST00000608381,;UGT1A5,missense_variant,p.Pro153Arg,ENST00000373414,;UGT1A10,intron_variant,,ENST00000373445,;UGT1A6,intron_variant,,ENST00000305139,;UGT1A6,intron_variant,,ENST00000373424,;UGT1A7,intron_variant,,ENST00000373426,;UGT1A8,intron_variant,,ENST00000609637,;UGT1A6,intron_variant,,ENST00000406651,;UGT1A10,intron_variant,,ENST00000344644,;UGT1A8,intr…	G	ENSG00000240224
UGT1A5	0	.	GRCh37	2	234622318	234622319	+	Frame_Shift_Ins	INS	-	-	TC	novel	.	LUSC		TCGA-85-8481-01A-11D-2323-08	TCGA-85-8481-10A-01D-2323-08	-	-	.	.	.	.	.	.	.	.	.	.	.	.	.	.	.	c.683_684dupCT	p.Ala229LeufsTer35	p.A229Lfs*35	ENST00000373414	1/5	309	252	57	295	295	0	UGT1A8,frameshift_variant,p.Ala229LeufsTer35,ENST00000608381,;UGT1A5,frameshift_variant,p.Ala229LeufsTer35,ENST00000373414,;UGT1A10,intron_variant,,ENST00000373445,;UGT1A6,intron_variant,,ENST00000305139,;UGT1A6,intron_variant,,ENST00000373424,;UGT1A7,intron_variant,,ENST00000373426,;UGT1A8,intron_variant,,ENST00000609637,;UGT1A6,intron_variant,,ENST00000406651,;UGT1A10,intron_variant,,ENST000003…	TC	ENSG00000240224
UGT1A5	0	.	GRCh37	2	234621894	234621894	+	Missense_Mutation	SNP	A	A	C	.	.	OV		TCGA-24-2280-01A-01W-0799-08	TCGA-24-2280-10A-01W-0799-08	A	A	.	.	.	.	.	.	.	.	.	.	.	.	.	.	.	c.257A>C	p.Gln86Pro	p.Q86P	ENST00000373414	1/5	237	211	25	385	385	0	UGT1A8,missense_variant,p.Gln86Pro,ENST00000608381,;UGT1A5,missense_variant,p.Gln86Pro,ENST00000373414,;UGT1A10,intron_variant,,ENST00000373445,;UGT1A6,intron_variant,,ENST00000305139,;UGT1A6,intron_variant,,ENST00000373424,;UGT1A7,intron_variant,,ENST00000373426,;UGT1A8,intron_variant,,ENST00000609637,;UGT1A6,intron_variant,,ENST00000406651,;UGT1A10,intron_variant,,ENST00000344644,;UGT1A8,intron…	C	ENSG00000240224
UGT1A5	0	.	GRCh37	2	234621853	234621853	+	Silent	SNP	G	G	A	rs757096232	.	OV		TCGA-61-1998-01A-01W-0722-08	TCGA-61-1998-10A-01W-0722-08	G	G	.	.	.	.	.	.	.	.	.	.	.	.	.	.	.	c.216G>A	p.%3D	p.E72E	ENST00000373414	1/5	223	203	20	264	264	0	UGT1A8,synonymous_variant,p.%3D,ENST00000608381,;UGT1A5,synonymous_variant,p.%3D,ENST00000373414,;UGT1A10,intron_variant,,ENST00000373445,;UGT1A6,intron_variant,,ENST00000305139,;UGT1A6,intron_variant,,ENST00000373424,;UGT1A7,intron_variant,,ENST00000373426,;UGT1A8,intron_variant,,ENST00000609637,;UGT1A6,intron_variant,,ENST00000406651,;UGT1A10,intron_variant,,ENST00000344644,;UGT1A8,intron_varia…	A	ENSG00000240224
UGT1A5	0	.	GRCh37	2	234622355	234622356	+	Frame_Shift_Ins	INS	-	-	AG	novel	.	SARC		TCGA-3B-A9HT-01A-11D-A38Z-09	TCGA-3B-A9HT-10A-01D-A38Z-09	-	-	.	.	.	.	.	.	.	.	.	.	.	.	.	.	.	c.725_726dupAG	p.Val243ArgfsTer21	p.V243Rfs*21	ENST00000373414	1/5	76	69	7	73	73	0	UGT1A5,frameshift_variant,p.Val243ArgfsTer21,ENST00000373414,;UGT1A8,frameshift_variant,p.Val243ArgfsTer21,ENST00000608381,;UGT1A10,intron_variant,,ENST00000373445,;UGT1A6,intron_variant,,ENST00000305139,;UGT1A6,intron_variant,,ENST00000406651,;UGT1A6,intron_variant,,ENST00000373424,;UGT1A7,intron_variant,,ENST00000373426,;UGT1A8,intron_variant,,ENST00000373450,;UGT1A10,intron_variant,,ENST000003…	AG	ENSG00000240224
UGT1A5	0	.	GRCh37	2	234622417	234622417	+	Silent	SNP	C	C	T	rs780343524	.	SARC		TCGA-DX-A3UE-01A-11D-A307-09	TCGA-DX-A3UE-10A-01D-A307-09	C	C	.	.	.	.	.	.	.	.	.	.	.	.	.	.	.	c.780C>T	p.%3D	p.D260D	ENST00000373414	1/5	161	100	60	74	74	0	UGT1A5,synonymous_variant,p.%3D,ENST00000373414,;UGT1A8,synonymous_variant,p.%3D,ENST00000608381,;UGT1A10,intron_variant,,ENST00000373445,;UGT1A6,intron_variant,,ENST00000305139,;UGT1A6,intron_variant,,ENST00000406651,;UGT1A6,intron_variant,,ENST00000373424,;UGT1A7,intron_variant,,ENST00000373426,;UGT1A8,intron_variant,,ENST00000373450,;UGT1A10,intron_variant,,ENST00000344644,;UGT1A8,intron_varia…	T	ENSG00000240224
UGT1A5	0	.	GRCh37	2	234621847	234621847	+	Missense_Mutation	SNP	A	A	C	novel	.	SARC		TCGA-DX-A48O-01A-11D-A307-09	TCGA-DX-A48O-10A-01D-A307-09	A	A	.	.	.	.	.	.	.	.	.	.	.	.	.	.	.	c.210A>C	p.Lys70Asn	p.K70N	ENST00000373414	1/5	128	72	56	62	62	0	UGT1A8,missense_variant,p.Lys70Asn,ENST00000608381,;UGT1A5,missense_variant,p.Lys70Asn,ENST00000373414,;UGT1A10,intron_variant,,ENST00000373445,;UGT1A6,intron_variant,,ENST00000305139,;UGT1A6,intron_variant,,ENST00000373424,;UGT1A7,intron_variant,,ENST00000373426,;UGT1A8,intron_variant,,ENST00000609637,;UGT1A6,intron_variant,,ENST00000406651,;UGT1A10,intron_variant,,ENST00000344644,;UGT1A8,intron…	C	ENSG00000240224
UGT1A5	0	.	GRCh37	2	234622153	234622153	+	Silent	SNP	C	C	T	rs113654637	.	SKCM-Metastatic		TCGA-3N-A9WB-06A-11D-A38G-08	TCGA-3N-A9WB-10A-01D-A38J-08	C	C	.	.	.	.	.	.	.	.	.	.	.	.	.	.	.	c.516C>T	p.%3D	p.F172F	ENST00000373414	1/5	135	79	56	172	172	0	UGT1A8,synonymous_variant,p.%3D,ENST00000608381,;UGT1A5,synonymous_variant,p.%3D,ENST00000373414,;UGT1A10,intron_variant,,ENST00000373445,;UGT1A6,intron_variant,,ENST00000305139,;UGT1A6,intron_variant,,ENST00000373424,;UGT1A7,intron_variant,,ENST00000373426,;UGT1A8,intron_variant,,ENST00000609637,;UGT1A6,intron_variant,,ENST00000406651,;UGT1A10,intron_variant,,ENST00000344644,;UGT1A8,intron_varia…	T	ENSG00000240224
UGT1A5	0	.	GRCh37	2	234621899	234621899	+	Missense_Mutation	SNP	G	G	A	.	.	SKCM-Metastatic		TCGA-BF-AAP0-06A-11D-A397-08	TCGA-BF-AAP0-10A-01D-A39A-08	G	G	.	.	.	.	.	.	.	.	.	.	.	.	.	.	.	c.262G>A	p.Glu88Lys	p.E88K	ENST00000373414	1/5	122	109	12	137	137	0	UGT1A8,missense_variant,p.Glu88Lys,ENST00000608381,;UGT1A5,missense_variant,p.Glu88Lys,ENST00000373414,;UGT1A10,intron_variant,,ENST00000373445,;UGT1A6,intron_variant,,ENST00000305139,;UGT1A6,intron_variant,,ENST00000373424,;UGT1A7,intron_variant,,ENST00000373426,;UGT1A8,intron_variant,,ENST00000609637,;UGT1A6,intron_variant,,ENST00000406651,;UGT1A10,intron_variant,,ENST00000344644,;UGT1A8,intron…	A	ENSG00000240224
UGT1A5	0	.	GRCh37	2	234621899	234621899	+	Missense_Mutation	SNP	G	G	A	.	.	SKCM-Metastatic		TCGA-D3-A51J-06A-11D-A25O-08	TCGA-D3-A51J-10A-01D-A25O-08	G	G	.	.	.	.	.	.	.	.	.	.	.	.	.	.	.	c.262G>A	p.Glu88Lys	p.E88K	ENST00000373414	1/5	78	61	17	84	84	0	UGT1A8,missense_variant,p.Glu88Lys,ENST00000608381,;UGT1A5,missense_variant,p.Glu88Lys,ENST00000373414,;UGT1A10,intron_variant,,ENST00000373445,;UGT1A6,intron_variant,,ENST00000305139,;UGT1A6,intron_variant,,ENST00000373424,;UGT1A7,intron_variant,,ENST00000373426,;UGT1A8,intron_variant,,ENST00000609637,;UGT1A6,intron_variant,,ENST00000406651,;UGT1A10,intron_variant,,ENST00000344644,;UGT1A8,intron…	A	ENSG00000240224
UGT1A5	0	.	GRCh37	2	234622468	234622468	+	Silent	SNP	G	G	A	rs774712611	.	SKCM-Metastatic		TCGA-D3-A8GQ-06A-11D-A372-08	TCGA-D3-A8GQ-10A-01D-A375-08	G	G	.	.	.	.	.	.	.	.	.	.	.	.	.	.	.	c.831G>A	p.%3D	p.G277G	ENST00000373414	1/5	242	107	135	185	185	0	UGT1A8,synonymous_variant,p.%3D,ENST00000608381,;UGT1A5,synonymous_variant,p.%3D,ENST00000373414,;UGT1A10,intron_variant,,ENST00000373445,;UGT1A6,intron_variant,,ENST00000305139,;UGT1A6,intron_variant,,ENST00000373424,;UGT1A7,intron_variant,,ENST00000373426,;UGT1A8,intron_variant,,ENST00000609637,;UGT1A6,intron_variant,,ENST00000406651,;UGT1A10,intron_variant,,ENST00000344644,;UGT1A8,intron_varia…	A	ENSG00000240224
UGT1A5	0	.	GRCh37	2	234622266	234622266	+	Missense_Mutation	SNP	G	G	A	novel	.	SKCM-Metastatic		TCGA-D9-A6EC-06A-11D-A30X-08	TCGA-D9-A6EC-10A-01D-A30X-08	G	G	.	.	.	.	.	.	.	.	.	.	.	.	.	.	.	c.629G>A	p.Arg210Lys	p.R210K	ENST00000373414	1/5	158	53	105	217	217	0	UGT1A8,missense_variant,p.Arg210Lys,ENST00000608381,;UGT1A5,missense_variant,p.Arg210Lys,ENST00000373414,;UGT1A10,intron_variant,,ENST00000373445,;UGT1A6,intron_variant,,ENST00000305139,;UGT1A6,intron_variant,,ENST00000373424,;UGT1A7,intron_variant,,ENST00000373426,;UGT1A8,intron_variant,,ENST00000609637,;UGT1A6,intron_variant,,ENST00000406651,;UGT1A10,intron_variant,,ENST00000344644,;UGT1A8,intr…	A	ENSG00000240224
UGT1A5	0	.	GRCh37	2	234622120	234622120	+	Silent	SNP	G	G	A	rs779583012	.	SKCM-Metastatic		TCGA-EE-A181-06A-11D-A196-08	TCGA-EE-A181-10A-01D-A198-08	G	G	.	.	.	.	.	.	.	.	.	.	.	.	.	.	.	c.483G>A	p.%3D	p.L161L	ENST00000373414	1/5	132	109	23	213	212	0	UGT1A8,synonymous_variant,p.%3D,ENST00000608381,;UGT1A5,synonymous_variant,p.%3D,ENST00000373414,;UGT1A10,intron_variant,,ENST00000373445,;UGT1A6,intron_variant,,ENST00000305139,;UGT1A6,intron_variant,,ENST00000373424,;UGT1A7,intron_variant,,ENST00000373426,;UGT1A8,intron_variant,,ENST00000609637,;UGT1A6,intron_variant,,ENST00000406651,;UGT1A10,intron_variant,,ENST00000344644,;UGT1A8,intron_varia…	A	ENSG00000240224
UGT1A5	0	.	GRCh37	2	234622121	234622121	+	Missense_Mutation	SNP	G	G	T	novel	.	SKCM-Metastatic		TCGA-EE-A181-06A-11D-A196-08	TCGA-EE-A181-10A-01D-A198-08	G	G	.	.	.	.	.	.	.	.	.	.	.	.	.	.	.	c.484G>T	p.Ala162Ser	p.A162S	ENST00000373414	1/5	134	111	23	216	216	0	UGT1A8,missense_variant,p.Ala162Ser,ENST00000608381,;UGT1A5,missense_variant,p.Ala162Ser,ENST00000373414,;UGT1A10,intron_variant,,ENST00000373445,;UGT1A6,intron_variant,,ENST00000305139,;UGT1A6,intron_variant,,ENST00000373424,;UGT1A7,intron_variant,,ENST00000373426,;UGT1A8,intron_variant,,ENST00000609637,;UGT1A6,intron_variant,,ENST00000406651,;UGT1A10,intron_variant,,ENST00000344644,;UGT1A8,intr…	T	ENSG00000240224
UGT1A5	0	.	GRCh37	2	234621899	234621899	+	Missense_Mutation	SNP	G	G	A	.	.	SKCM-Metastatic		TCGA-EE-A2MS-06A-11D-A197-08	TCGA-EE-A2MS-10A-01D-A199-08	G	G	.	.	.	.	.	.	.	.	.	.	.	.	.	.	.	c.262G>A	p.Glu88Lys	p.E88K	ENST00000373414	1/5	64	40	24	111	111	0	UGT1A8,missense_variant,p.Glu88Lys,ENST00000608381,;UGT1A5,missense_variant,p.Glu88Lys,ENST00000373414,;UGT1A10,intron_variant,,ENST00000373445,;UGT1A6,intron_variant,,ENST00000305139,;UGT1A6,intron_variant,,ENST00000373424,;UGT1A7,intron_variant,,ENST00000373426,;UGT1A8,intron_variant,,ENST00000609637,;UGT1A6,intron_variant,,ENST00000406651,;UGT1A10,intron_variant,,ENST00000344644,;UGT1A8,intron…	A	ENSG00000240224
UGT1A5	0	.	GRCh37	2	234622071	234622071	+	Missense_Mutation	SNP	C	C	T	rs748267657	.	SKCM-Metastatic		TCGA-EE-A3AB-06A-11D-A196-08	TCGA-EE-A3AB-10A-01D-A198-08	C	C	.	.	.	.	.	.	.	.	.	.	.	.	.	.	.	c.434C>T	p.Ser145Phe	p.S145F	ENST00000373414	1/5	220	154	65	226	226	0	UGT1A8,missense_variant,p.Ser145Phe,ENST00000608381,;UGT1A5,missense_variant,p.Ser145Phe,ENST00000373414,;UGT1A10,intron_variant,,ENST00000373445,;UGT1A6,intron_variant,,ENST00000305139,;UGT1A6,intron_variant,,ENST00000373424,;UGT1A7,intron_variant,,ENST00000373426,;UGT1A8,intron_variant,,ENST00000609637,;UGT1A6,intron_variant,,ENST00000406651,;UGT1A10,intron_variant,,ENST00000344644,;UGT1A8,intr…	T	ENSG00000240224
UGT1A5	0	.	GRCh37	2	234622455	234622455	+	Missense_Mutation	SNP	T	T	C	.	.	SKCM-Metastatic		TCGA-FS-A1ZK-06A-11D-A197-08	TCGA-FS-A1ZK-10A-01D-A199-08	T	T	.	.	.	.	.	.	.	.	.	.	.	.	.	.	.	c.818T>C	p.Met273Thr	p.M273T	ENST00000373414	1/5	55	39	16	101	100	0	UGT1A8,missense_variant,p.Met273Thr,ENST00000608381,;UGT1A5,missense_variant,p.Met273Thr,ENST00000373414,;UGT1A10,intron_variant,,ENST00000373445,;UGT1A6,intron_variant,,ENST00000305139,;UGT1A6,intron_variant,,ENST00000373424,;UGT1A7,intron_variant,,ENST00000373426,;UGT1A8,intron_variant,,ENST00000609637,;UGT1A6,intron_variant,,ENST00000406651,;UGT1A10,intron_variant,,ENST00000344644,;UGT1A8,intr…	C	ENSG00000240224
UGT1A5	0	.	GRCh37	2	234621888	234621888	+	Nonsense_Mutation	SNP	G	G	A	.	.	SKCM-Metastatic		TCGA-FW-A5DY-06A-11D-A30X-08	TCGA-FW-A5DY-11A-12D-A30X-08	G	G	.	.	.	.	.	.	.	.	.	.	.	.	.	.	.	c.251G>A	p.Trp84Ter	p.W84*	ENST00000373414	1/5	82	74	8	99	98	1	UGT1A8,stop_gained,p.Trp84Ter,ENST00000608381,;UGT1A5,stop_gained,p.Trp84Ter,ENST00000373414,;UGT1A10,intron_variant,,ENST00000373445,;UGT1A6,intron_variant,,ENST00000305139,;UGT1A6,intron_variant,,ENST00000373424,;UGT1A7,intron_variant,,ENST00000373426,;UGT1A8,intron_variant,,ENST00000609637,;UGT1A6,intron_variant,,ENST00000406651,;UGT1A10,intron_variant,,ENST00000344644,;UGT1A8,intron_variant,,…	A	ENSG00000240224
UGT1A5	0	.	GRCh37	2	234622403	234622403	+	Silent	SNP	C	C	T	.	.	SKCM-Metastatic		TCGA-GN-A266-06A-11D-A197-08	TCGA-GN-A266-10A-01D-A199-08	C	C	.	.	.	.	.	.	.	.	.	.	.	.	.	.	.	c.766C>T	p.%3D	p.L256L	ENST00000373414	1/5	121	77	44	296	296	0	UGT1A5,synonymous_variant,p.%3D,ENST00000373414,;UGT1A8,synonymous_variant,p.%3D,ENST00000608381,;UGT1A10,intron_variant,,ENST00000373445,;UGT1A6,intron_variant,,ENST00000305139,;UGT1A6,intron_variant,,ENST00000406651,;UGT1A6,intron_variant,,ENST00000373424,;UGT1A7,intron_variant,,ENST00000373426,;UGT1A8,intron_variant,,ENST00000373450,;UGT1A10,intron_variant,,ENST00000344644,;UGT1A8,intron_varia…	T	ENSG00000240224
UGT1A5	0	.	GRCh37	2	234622153	234622153	+	Silent	SNP	C	C	T	rs113654637	.	SKCM-Metastatic		TCGA-W3-AA1O-06A-11D-A38G-08	TCGA-W3-AA1O-10A-01D-A38J-08	C	C	.	.	.	.	.	.	.	.	.	.	.	.	.	.	.	c.516C>T	p.%3D	p.F172F	ENST00000373414	1/5	152	98	53	150	150	0	UGT1A8,synonymous_variant,p.%3D,ENST00000608381,;UGT1A5,synonymous_variant,p.%3D,ENST00000373414,;UGT1A10,intron_variant,,ENST00000373445,;UGT1A6,intron_variant,,ENST00000305139,;UGT1A6,intron_variant,,ENST00000373424,;UGT1A7,intron_variant,,ENST00000373426,;UGT1A8,intron_variant,,ENST00000609637,;UGT1A6,intron_variant,,ENST00000406651,;UGT1A10,intron_variant,,ENST00000344644,;UGT1A8,intron_varia…	T	ENSG00000240224
UGT1A5	0	.	GRCh37	2	234622111	234622111	+	Silent	SNP	G	G	A	rs147117995	.	SKCM-Metastatic		TCGA-EB-A44R-06A-41D-A25O-08	TCGA-EB-A44R-10A-01D-A25O-08	G	G	.	.	.	.	.	.	.	.	.	.	.	.	.	.	.	c.474G>A	p.%3D	p.A158A	ENST00000373414	1/5	117	91	26	110	110	0	UGT1A8,synonymous_variant,p.%3D,ENST00000608381,;UGT1A5,synonymous_variant,p.%3D,ENST00000373414,;UGT1A10,intron_variant,,ENST00000373445,;UGT1A6,intron_variant,,ENST00000305139,;UGT1A6,intron_variant,,ENST00000373424,;UGT1A7,intron_variant,,ENST00000373426,;UGT1A8,intron_variant,,ENST00000609637,;UGT1A6,intron_variant,,ENST00000406651,;UGT1A10,intron_variant,,ENST00000344644,;UGT1A8,intron_varia…	A	ENSG00000240224
UGT1A5	0	.	GRCh37	2	234622109	234622109	+	Missense_Mutation	SNP	G	G	A	rs762349371	.	STAD		TCGA-BR-7851-01A-11D-2201-08	TCGA-BR-7851-10A-01D-2201-08	G	G	.	.	.	.	.	.	.	.	.	.	.	.	.	.	.	c.472G>A	p.Ala158Thr	p.A158T	ENST00000373414	1/5	197	119	78	259	259	0	UGT1A8,missense_variant,p.Ala158Thr,ENST00000608381,;UGT1A5,missense_variant,p.Ala158Thr,ENST00000373414,;UGT1A10,intron_variant,,ENST00000373445,;UGT1A6,intron_variant,,ENST00000305139,;UGT1A6,intron_variant,,ENST00000373424,;UGT1A7,intron_variant,,ENST00000373426,;UGT1A8,intron_variant,,ENST00000609637,;UGT1A6,intron_variant,,ENST00000406651,;UGT1A10,intron_variant,,ENST00000344644,;UGT1A8,intr…	A	ENSG00000240224
UGT1A5	0	.	GRCh37	2	234622228	234622228	+	Silent	SNP	A	A	G	.	.	STAD		TCGA-CD-5813-01A-11D-1600-08	TCGA-CD-5813-10A-01D-1600-08	A	A	.	.	.	.	.	.	.	.	.	.	.	.	.	.	.	c.591A>G	p.%3D	p.L197L	ENST00000373414	1/5	374	328	46	462	462	0	UGT1A8,synonymous_variant,p.%3D,ENST00000608381,;UGT1A5,synonymous_variant,p.%3D,ENST00000373414,;UGT1A10,intron_variant,,ENST00000373445,;UGT1A6,intron_variant,,ENST00000305139,;UGT1A6,intron_variant,,ENST00000373424,;UGT1A7,intron_variant,,ENST00000373426,;UGT1A8,intron_variant,,ENST00000609637,;UGT1A6,intron_variant,,ENST00000406651,;UGT1A10,intron_variant,,ENST00000344644,;UGT1A8,intron_varia…	G	ENSG00000240224
UGT1A5	0	.	GRCh37	2	234621913	234621913	+	Silent	SNP	T	T	C	.	.	STAD		TCGA-CD-A4MG-01A-11D-A25D-08	TCGA-CD-A4MG-10A-01D-A25E-08	T	T	.	.	.	.	.	.	.	.	.	.	.	.	.	.	.	c.276T>C	p.%3D	p.L92L	ENST00000373414	1/5	91	45	45	116	116	0	UGT1A8,synonymous_variant,p.%3D,ENST00000608381,;UGT1A5,synonymous_variant,p.%3D,ENST00000373414,;UGT1A10,intron_variant,,ENST00000373445,;UGT1A6,intron_variant,,ENST00000305139,;UGT1A6,intron_variant,,ENST00000373424,;UGT1A7,intron_variant,,ENST00000373426,;UGT1A8,intron_variant,,ENST00000609637,;UGT1A6,intron_variant,,ENST00000406651,;UGT1A10,intron_variant,,ENST00000344644,;UGT1A8,intron_varia…	C	ENSG00000240224
UGT1A5	0	.	GRCh37	2	234622039	234622039	+	Silent	SNP	T	T	C	rs780535548	.	STAD		TCGA-CD-A4MI-01A-21D-A25D-08	TCGA-CD-A4MI-10A-01D-A25E-08	T	T	.	.	.	.	.	.	.	.	.	.	.	.	.	.	.	c.402T>C	p.%3D	p.N134N	ENST00000373414	1/5	292	251	41	195	195	0	UGT1A8,synonymous_variant,p.%3D,ENST00000608381,;UGT1A5,synonymous_variant,p.%3D,ENST00000373414,;UGT1A10,intron_variant,,ENST00000373445,;UGT1A6,intron_variant,,ENST00000305139,;UGT1A6,intron_variant,,ENST00000373424,;UGT1A7,intron_variant,,ENST00000373426,;UGT1A8,intron_variant,,ENST00000609637,;UGT1A6,intron_variant,,ENST00000406651,;UGT1A10,intron_variant,,ENST00000344644,;UGT1A8,intron_varia…	C	ENSG00000240224
UGT1A5	0	.	GRCh37	2	234622259	234622259	+	Missense_Mutation	SNP	C	C	A	rs769573194	.	STAD		TCGA-HU-A4GQ-01A-11D-A25D-08	TCGA-HU-A4GQ-10A-01D-A25E-08	C	C	.	.	.	.	.	.	.	.	.	.	.	.	.	.	.	c.622C>A	p.Leu208Met	p.L208M	ENST00000373414	1/5	166	119	47	206	206	0	UGT1A8,missense_variant,p.Leu208Met,ENST00000608381,;UGT1A5,missense_variant,p.Leu208Met,ENST00000373414,;UGT1A10,intron_variant,,ENST00000373445,;UGT1A6,intron_variant,,ENST00000305139,;UGT1A6,intron_variant,,ENST00000373424,;UGT1A7,intron_variant,,ENST00000373426,;UGT1A8,intron_variant,,ENST00000609637,;UGT1A6,intron_variant,,ENST00000406651,;UGT1A10,intron_variant,,ENST00000344644,;UGT1A8,intr…	A	ENSG00000240224
UGT1A5	0	.	GRCh37	2	234622019	234622019	+	Missense_Mutation	SNP	T	T	G	novel	.	UCEC		TCGA-AJ-A23O-01A-11D-A159-09	TCGA-AJ-A23O-10A-01D-A159-09	T	T	.	.	.	.	.	.	.	.	.	.	.	.	.	.	.	c.382T>G	p.Cys128Gly	p.C128G	ENST00000373414	1/5	91	75	15	91	91	0	UGT1A8,missense_variant,p.Cys128Gly,ENST00000608381,;UGT1A5,missense_variant,p.Cys128Gly,ENST00000373414,;UGT1A10,intron_variant,,ENST00000373445,;UGT1A6,intron_variant,,ENST00000305139,;UGT1A6,intron_variant,,ENST00000373424,;UGT1A7,intron_variant,,ENST00000373426,;UGT1A8,intron_variant,,ENST00000609637,;UGT1A6,intron_variant,,ENST00000406651,;UGT1A10,intron_variant,,ENST00000344644,;UGT1A8,intr…	G	ENSG00000240224
UGT1A5	0	.	GRCh37	2	234622046	234622046	+	Missense_Mutation	SNP	C	C	A	novel	.	UCEC		TCGA-AJ-A2QO-01A-11D-A18P-09	TCGA-AJ-A2QO-10A-01D-A18P-09	C	C	.	.	.	.	.	.	.	.	.	.	.	.	.	.	.	c.409C>A	p.Leu137Met	p.L137M	ENST00000373414	1/5	140	123	17	111	111	0	UGT1A8,missense_variant,p.Leu137Met,ENST00000608381,;UGT1A5,missense_variant,p.Leu137Met,ENST00000373414,;UGT1A10,intron_variant,,ENST00000373445,;UGT1A6,intron_variant,,ENST00000305139,;UGT1A6,intron_variant,,ENST00000373424,;UGT1A7,intron_variant,,ENST00000373426,;UGT1A8,intron_variant,,ENST00000609637,;UGT1A6,intron_variant,,ENST00000406651,;UGT1A10,intron_variant,,ENST00000344644,;UGT1A8,intr…	A	ENSG00000240224
UGT1A5	0	.	GRCh37	2	234622487	234622487	+	Missense_Mutation	SNP	G	G	A	rs754082390	.	UCEC		TCGA-AX-A3G9-01A-11D-A228-09	TCGA-AX-A3G9-10A-01D-A22A-09	G	G	.	.	.	.	.	.	.	.	.	.	.	.	.	.	.	c.850G>A	p.Gly284Arg	p.G284R	ENST00000373414	1/5	84	49	34	103	103	0	UGT1A8,missense_variant,p.Gly284Arg,ENST00000608381,;UGT1A5,missense_variant,p.Gly284Arg,ENST00000373414,;UGT1A10,intron_variant,,ENST00000373445,;UGT1A6,intron_variant,,ENST00000305139,;UGT1A6,intron_variant,,ENST00000373424,;UGT1A7,intron_variant,,ENST00000373426,;UGT1A8,intron_variant,,ENST00000609637,;UGT1A6,intron_variant,,ENST00000406651,;UGT1A10,intron_variant,,ENST00000344644,;UGT1A8,intr…	A	ENSG00000240224
UGT1A5	0	.	GRCh37	2	234621899	234621899	+	Missense_Mutation	SNP	G	G	A	.	.	UCEC		TCGA-B5-A11N-01A-11D-A122-09	TCGA-B5-A11N-10A-01D-A122-09	G	G	.	.	.	.	.	.	.	.	.	.	.	.	.	.	.	c.262G>A	p.Glu88Lys	p.E88K	ENST00000373414	1/5	234	185	48	236	236	0	UGT1A8,missense_variant,p.Glu88Lys,ENST00000608381,;UGT1A5,missense_variant,p.Glu88Lys,ENST00000373414,;UGT1A10,intron_variant,,ENST00000373445,;UGT1A6,intron_variant,,ENST00000305139,;UGT1A6,intron_variant,,ENST00000373424,;UGT1A7,intron_variant,,ENST00000373426,;UGT1A8,intron_variant,,ENST00000609637,;UGT1A6,intron_variant,,ENST00000406651,;UGT1A10,intron_variant,,ENST00000344644,;UGT1A8,intron…	A	ENSG00000240224
UGT1A5	0	.	GRCh37	2	234622395	234622395	+	Missense_Mutation	SNP	C	C	T	novel	.	UCEC		TCGA-BK-A6W3-01A-12D-A34Q-09	TCGA-BK-A6W3-10A-01D-A34Q-09	C	C	.	.	.	.	.	.	.	.	.	.	.	.	.	.	.	c.758C>T	p.Ser253Phe	p.S253F	ENST00000373414	1/5	68	42	25	95	95	0	UGT1A5,missense_variant,p.Ser253Phe,ENST00000373414,;UGT1A8,missense_variant,p.Ser253Phe,ENST00000608381,;UGT1A10,intron_variant,,ENST00000373445,;UGT1A6,intron_variant,,ENST00000305139,;UGT1A6,intron_variant,,ENST00000406651,;UGT1A6,intron_variant,,ENST00000373424,;UGT1A7,intron_variant,,ENST00000373426,;UGT1A8,intron_variant,,ENST00000373450,;UGT1A10,intron_variant,,ENST00000344644,;UGT1A8,intr…	T	ENSG00000240224
UGT1A5	0	.	GRCh37	2	234622079	234622079	+	Missense_Mutation	SNP	G	G	A	novel	.	UCEC		TCGA-EY-A1GU-01A-11D-A13L-09	TCGA-EY-A1GU-10A-01D-A13O-09	G	G	.	.	.	.	.	.	.	.	.	.	.	.	.	.	.	c.442G>A	p.Val148Met	p.V148M	ENST00000373414	1/5	105	57	48	91	91	0	UGT1A8,missense_variant,p.Val148Met,ENST00000608381,;UGT1A5,missense_variant,p.Val148Met,ENST00000373414,;UGT1A10,intron_variant,,ENST00000373445,;UGT1A6,intron_variant,,ENST00000305139,;UGT1A6,intron_variant,,ENST00000373424,;UGT1A7,intron_variant,,ENST00000373426,;UGT1A8,intron_variant,,ENST00000609637,;UGT1A6,intron_variant,,ENST00000406651,;UGT1A10,intron_variant,,ENST00000344644,;UGT1A8,intr…	A	ENSG00000240224
UGT1A5	0	.	GRCh37	2	234621887	234621887	+	Missense_Mutation	SNP	T	T	A	novel	.	UCEC		TCGA-KP-A3VZ-01A-11D-A228-09	TCGA-KP-A3VZ-10A-01D-A22A-09	T	T	.	.	.	.	.	.	.	.	.	.	.	.	.	.	.	c.250T>A	p.Trp84Arg	p.W84R	ENST00000373414	1/5	74	67	7	98	98	0	UGT1A8,missense_variant,p.Trp84Arg,ENST00000608381,;UGT1A5,missense_variant,p.Trp84Arg,ENST00000373414,;UGT1A10,intron_variant,,ENST00000373445,;UGT1A6,intron_variant,,ENST00000305139,;UGT1A6,intron_variant,,ENST00000373424,;UGT1A7,intron_variant,,ENST00000373426,;UGT1A8,intron_variant,,ENST00000609637,;UGT1A6,intron_variant,,ENST00000406651,;UGT1A10,intron_variant,,ENST00000344644,;UGT1A8,intron…	A	ENSG00000240224
UGT1A6	0	.	GRCh37	2	234602440	234602440	+	Missense_Mutation	SNP	C	C	T	.	.	BLCA		TCGA-DK-A3IK-01A-32D-A21A-08	TCGA-DK-A3IK-10A-01D-A21A-08	C	C	.	.	.	.	.	.	.	.	.	.	.	.	.	.	.	c.790C>T	p.Pro264Ser	p.P264S	ENST00000305139	1/5	404	311	93	361	361	0	UGT1A6,missense_variant,p.Pro264Ser,ENST00000305139,;UGT1A6,splice_region_variant,,ENST00000373424,;UGT1A6,5_prime_UTR_variant,,ENST00000406651,;UGT1A10,intron_variant,,ENST00000373445,;UGT1A7,intron_variant,,ENST00000373426,;UGT1A8,intron_variant,,ENST00000609637,;UGT1A10,intron_variant,,ENST00000344644,;UGT1A8,intron_variant,,ENST00000373450,;UGT1A9,intron_variant,,ENST00000354728,;UGT1A6,downs…	T	ENSG00000167165
UGT1A6	0	.	GRCh37	2	234601626	234601626	+	5'UTR	SNP	C	C	T	rs777378989	.	BLCA		TCGA-FD-A3SL-01A-21D-A22Z-08	TCGA-FD-A3SL-10A-01D-A22Z-08	C	C	.	.	.	.	.	.	.	.	.	.	.	.	.	.	.	c.-25C>T	.	.	ENST00000305139	1/5	50	24	25	59	59	0	UGT1A6,5_prime_UTR_variant,,ENST00000305139,;UGT1A10,intron_variant,,ENST00000373445,;UGT1A6,intron_variant,,ENST00000441351,;UGT1A6,intron_variant,,ENST00000373424,;UGT1A7,intron_variant,,ENST00000373426,;UGT1A8,intron_variant,,ENST00000609637,;UGT1A10,intron_variant,,ENST00000344644,;UGT1A8,intron_variant,,ENST00000373450,;UGT1A9,intron_variant,,ENST00000354728,;UGT1A7,downstream_gene_variant,,…	T	ENSG00000167165
UGT1A6	0	.	GRCh37	2	234601975	234601975	+	Missense_Mutation	SNP	C	C	G	novel	.	BLCA		TCGA-XF-A9SP-01A-11D-A391-08	TCGA-XF-A9SP-10A-01D-A394-08	C	C	.	.	.	.	.	.	.	.	.	.	.	.	.	.	.	c.325C>G	p.Gln109Glu	p.Q109E	ENST00000305139	1/5	36	29	7	51	51	0	UGT1A6,missense_variant,p.Gln109Glu,ENST00000441351,;UGT1A6,missense_variant,p.Gln109Glu,ENST00000305139,;UGT1A10,intron_variant,,ENST00000373445,;UGT1A6,intron_variant,,ENST00000373424,;UGT1A7,intron_variant,,ENST00000373426,;UGT1A8,intron_variant,,ENST00000609637,;UGT1A10,intron_variant,,ENST00000344644,;UGT1A8,intron_variant,,ENST00000373450,;UGT1A9,intron_variant,,ENST00000354728,;UGT1A7,down…	G	ENSG00000167165
UGT1A6	0	.	GRCh37	2	234601550	234601550	+	5'UTR	SNP	C	C	A	novel	.	BLCA		TCGA-XF-A9T5-01A-11D-A42E-08	TCGA-XF-A9T5-10A-01D-A42H-08	C	C	.	.	.	.	.	.	.	.	.	.	.	.	.	.	.	c.-101C>A	.	.	ENST00000305139	1/5	14	11	3	15	15	0	UGT1A6,5_prime_UTR_variant,,ENST00000305139,;UGT1A10,intron_variant,,ENST00000373445,;UGT1A6,intron_variant,,ENST00000441351,;UGT1A6,intron_variant,,ENST00000373424,;UGT1A7,intron_variant,,ENST00000373426,;UGT1A8,intron_variant,,ENST00000609637,;UGT1A10,intron_variant,,ENST00000344644,;UGT1A8,intron_variant,,ENST00000373450,;UGT1A9,intron_variant,,ENST00000354728,;UGT1A7,downstream_gene_variant,,…	A	ENSG00000167165
UGT1A6	0	.	GRCh37	2	234601870	234601870	+	Missense_Mutation	SNP	A	A	G	.	.	BRCA		TCGA-A8-A09Q-01A-11W-A019-09	TCGA-A8-A09Q-10A-01W-A021-09	A	A	.	.	.	.	.	.	.	.	.	.	.	.	.	.	.	c.220A>G	p.Thr74Ala	p.T74A	ENST00000305139	1/5	205	179	25	221	221	0	UGT1A6,missense_variant,p.Thr74Ala,ENST00000441351,;UGT1A6,missense_variant,p.Thr74Ala,ENST00000305139,;UGT1A10,intron_variant,,ENST00000373445,;UGT1A6,intron_variant,,ENST00000373424,;UGT1A7,intron_variant,,ENST00000373426,;UGT1A8,intron_variant,,ENST00000609637,;UGT1A10,intron_variant,,ENST00000344644,;UGT1A8,intron_variant,,ENST00000373450,;UGT1A9,intron_variant,,ENST00000354728,;UGT1A7,downst…	G	ENSG00000167165
UGT1A6	0	.	GRCh37	2	234601797	234601797	+	Silent	SNP	C	C	A	.	.	BRCA		TCGA-AC-A23H-01A-11D-A159-09	TCGA-AC-A23H-11A-12D-A17G-09	C	C	.	.	.	.	.	.	.	.	.	.	.	.	.	.	.	c.147C>A	p.%3D	p.L49L	ENST00000305139	1/5	80	70	9	57	57	0	UGT1A6,synonymous_variant,p.%3D,ENST00000441351,;UGT1A6,synonymous_variant,p.%3D,ENST00000305139,;UGT1A10,intron_variant,,ENST00000373445,;UGT1A6,intron_variant,,ENST00000373424,;UGT1A7,intron_variant,,ENST00000373426,;UGT1A8,intron_variant,,ENST00000609637,;UGT1A10,intron_variant,,ENST00000344644,;UGT1A8,intron_variant,,ENST00000373450,;UGT1A9,intron_variant,,ENST00000354728,;UGT1A7,downstream_g…	A	ENSG00000167165
UGT1A6	0	.	GRCh37	2	234601855	234601855	+	Nonsense_Mutation	SNP	G	G	T	.	.	BRCA		TCGA-AN-A046-01A-21W-A050-09	TCGA-AN-A046-10A-01W-A055-09	G	G	.	.	.	.	.	.	.	.	.	.	.	.	.	.	.	c.205G>T	p.Glu69Ter	p.E69*	ENST00000305139	1/5	199	181	18	259	259	0	UGT1A6,stop_gained,p.Glu69Ter,ENST00000441351,;UGT1A6,stop_gained,p.Glu69Ter,ENST00000305139,;UGT1A10,intron_variant,,ENST00000373445,;UGT1A6,intron_variant,,ENST00000373424,;UGT1A7,intron_variant,,ENST00000373426,;UGT1A8,intron_variant,,ENST00000609637,;UGT1A10,intron_variant,,ENST00000344644,;UGT1A8,intron_variant,,ENST00000373450,;UGT1A9,intron_variant,,ENST00000354728,;UGT1A7,downstream_gene_…	T	ENSG00000167165
UGT1A6	0	.	GRCh37	2	234602486	234602486	+	Missense_Mutation	SNP	G	G	T	novel	.	BRCA		TCGA-AN-A0AL-01A-11W-A019-09	TCGA-AN-A0AL-10A-01W-A021-09	G	G	.	.	.	.	.	.	.	.	.	.	.	.	.	.	.	c.836G>T	p.Cys279Phe	p.C279F	ENST00000305139	1/5	920	897	23	1285	1284	1	UGT1A6,missense_variant,p.Cys279Phe,ENST00000305139,;UGT1A6,missense_variant,p.Cys12Phe,ENST00000373424,;UGT1A6,missense_variant,p.Cys12Phe,ENST00000406651,;UGT1A10,intron_variant,,ENST00000373445,;UGT1A7,intron_variant,,ENST00000373426,;UGT1A8,intron_variant,,ENST00000609637,;UGT1A10,intron_variant,,ENST00000344644,;UGT1A8,intron_variant,,ENST00000373450,;UGT1A9,intron_variant,,ENST00000354728,;…	T	ENSG00000167165
UGT1A6	0	.	GRCh37	2	234601744	234601744	+	Missense_Mutation	SNP	G	G	T	.	.	BRCA		TCGA-E2-A15T-01A-11D-A10Y-09	TCGA-E2-A15T-10A-01D-A110-09	G	G	.	.	.	.	.	.	.	.	.	.	.	.	.	.	.	c.94G>T	p.Val32Phe	p.V32F	ENST00000305139	1/5	25	11	13	86	86	0	UGT1A6,missense_variant,p.Val32Phe,ENST00000441351,;UGT1A6,missense_variant,p.Val32Phe,ENST00000305139,;UGT1A10,intron_variant,,ENST00000373445,;UGT1A6,intron_variant,,ENST00000373424,;UGT1A7,intron_variant,,ENST00000373426,;UGT1A8,intron_variant,,ENST00000609637,;UGT1A10,intron_variant,,ENST00000344644,;UGT1A8,intron_variant,,ENST00000373450,;UGT1A9,intron_variant,,ENST00000354728,;UGT1A7,downst…	T	ENSG00000167165
UGT1A6	0	.	GRCh37	2	234601716	234601716	+	Silent	SNP	C	C	T	novel	.	CESC		TCGA-2W-A8YY-01A-11D-A37N-09	TCGA-2W-A8YY-10A-01D-A37N-09	C	C	.	.	.	.	.	.	.	.	.	.	.	.	.	.	.	c.66C>T	p.%3D	p.G22G	ENST00000305139	1/5	30	16	14	28	28	0	UGT1A6,synonymous_variant,p.%3D,ENST00000441351,;UGT1A6,synonymous_variant,p.%3D,ENST00000305139,;UGT1A10,intron_variant,,ENST00000373445,;UGT1A6,intron_variant,,ENST00000373424,;UGT1A7,intron_variant,,ENST00000373426,;UGT1A8,intron_variant,,ENST00000609637,;UGT1A10,intron_variant,,ENST00000344644,;UGT1A8,intron_variant,,ENST00000373450,;UGT1A9,intron_variant,,ENST00000354728,;UGT1A7,downstream_g…	T	ENSG00000167165
UGT1A6	0	.	GRCh37	2	234601815	234601815	+	Silent	SNP	G	G	A	novel	.	CESC		TCGA-IR-A3LH-01A-21D-A20U-09	TCGA-IR-A3LH-10A-01D-A20U-09	G	G	.	.	.	.	.	.	.	.	.	.	.	.	.	.	.	c.165G>A	p.%3D	p.E55E	ENST00000305139	1/5	94	75	19	66	66	0	UGT1A6,synonymous_variant,p.%3D,ENST00000441351,;UGT1A6,synonymous_variant,p.%3D,ENST00000305139,;UGT1A10,intron_variant,,ENST00000373445,;UGT1A6,intron_variant,,ENST00000373424,;UGT1A7,intron_variant,,ENST00000373426,;UGT1A8,intron_variant,,ENST00000609637,;UGT1A10,intron_variant,,ENST00000344644,;UGT1A8,intron_variant,,ENST00000373450,;UGT1A9,intron_variant,,ENST00000354728,;UGT1A7,downstream_g…	A	ENSG00000167165
UGT1A6	0	.	GRCh37	2	234602059	234602059	+	Missense_Mutation	SNP	A	A	T	novel	.	CESC		TCGA-UC-A7PD-01A-11D-A351-09	TCGA-UC-A7PD-11A-12D-A351-09	A	A	.	.	.	.	.	.	.	.	.	.	.	.	.	.	.	c.409A>T	p.Asn137Tyr	p.N137Y	ENST00000305139	1/5	54	30	23	64	64	0	UGT1A6,missense_variant,p.Asn137Tyr,ENST00000441351,;UGT1A6,missense_variant,p.Asn137Tyr,ENST00000305139,;UGT1A10,intron_variant,,ENST00000373445,;UGT1A6,intron_variant,,ENST00000373424,;UGT1A7,intron_variant,,ENST00000373426,;UGT1A8,intron_variant,,ENST00000609637,;UGT1A10,intron_variant,,ENST00000344644,;UGT1A8,intron_variant,,ENST00000373450,;UGT1A9,intron_variant,,ENST00000354728,;UGT1A7,down…	T	ENSG00000167165
UGT1A6	0	.	GRCh37	2	234601667	234601667	+	Missense_Mutation	SNP	G	G	A	rs115279280	.	CESC		TCGA-ZJ-AAXA-01A-11D-A42O-09	TCGA-ZJ-AAXA-10A-01D-A42R-09	G	G	.	.	.	.	.	.	.	.	.	.	.	.	.	.	.	c.17G>A	p.Arg6His	p.R6H	ENST00000305139	1/5	28	17	10	52	52	0	UGT1A6,missense_variant,p.Arg6His,ENST00000441351,;UGT1A6,missense_variant,p.Arg6His,ENST00000305139,;UGT1A10,intron_variant,,ENST00000373445,;UGT1A6,intron_variant,,ENST00000373424,;UGT1A7,intron_variant,,ENST00000373426,;UGT1A8,intron_variant,,ENST00000609637,;UGT1A10,intron_variant,,ENST00000344644,;UGT1A8,intron_variant,,ENST00000373450,;UGT1A9,intron_variant,,ENST00000354728,;UGT1A7,downstre…	A	ENSG00000167165
UGT1A6	0	.	GRCh37	2	234601919	234601919	+	Missense_Mutation	SNP	G	G	A	rs147761911	.	COAD		TCGA-A6-6781-01A-22D-A270-10	TCGA-A6-6781-10A-01D-A270-10	G	G	.	.	.	.	.	.	.	.	.	.	.	.	.	.	.	c.269G>A	p.Arg90His	p.R90H	ENST00000305139	1/5	80	52	27	76	76	0	UGT1A6,missense_variant,p.Arg90His,ENST00000441351,;UGT1A6,missense_variant,p.Arg90His,ENST00000305139,;UGT1A10,intron_variant,,ENST00000373445,;UGT1A6,intron_variant,,ENST00000373424,;UGT1A7,intron_variant,,ENST00000373426,;UGT1A8,intron_variant,,ENST00000609637,;UGT1A10,intron_variant,,ENST00000344644,;UGT1A8,intron_variant,,ENST00000373450,;UGT1A9,intron_variant,,ENST00000354728,;UGT1A7,downst…	A	ENSG00000167165
UGT1A6	0	.	GRCh37	2	234602181	234602181	+	Silent	SNP	C	C	T	.	.	COAD		TCGA-AZ-6598-01A-11D-1771-10	TCGA-AZ-6598-11A-01D-1771-10	C	C	.	.	.	.	.	.	.	.	.	.	.	.	.	.	.	c.531C>T	p.%3D	p.S177S	ENST00000305139	1/5	148	119	28	99	99	0	UGT1A6,synonymous_variant,p.%3D,ENST00000441351,;UGT1A6,synonymous_variant,p.%3D,ENST00000305139,;UGT1A10,intron_variant,,ENST00000373445,;UGT1A6,intron_variant,,ENST00000373424,;UGT1A7,intron_variant,,ENST00000373426,;UGT1A8,intron_variant,,ENST00000609637,;UGT1A10,intron_variant,,ENST00000344644,;UGT1A8,intron_variant,,ENST00000373450,;UGT1A9,intron_variant,,ENST00000354728,;UGT1A7,downstream_g…	T	ENSG00000167165
UGT1A6	0	.	GRCh37	2	234601855	234601855	+	Nonsense_Mutation	SNP	G	G	T	.	.	COAD		TCGA-CA-6718-01A-11D-1835-10	TCGA-CA-6718-10A-01D-1835-10	G	G	.	.	.	.	.	.	.	.	.	.	.	.	.	.	.	c.205G>T	p.Glu69Ter	p.E69*	ENST00000305139	1/5	72	60	12	82	82	0	UGT1A6,stop_gained,p.Glu69Ter,ENST00000441351,;UGT1A6,stop_gained,p.Glu69Ter,ENST00000305139,;UGT1A10,intron_variant,,ENST00000373445,;UGT1A6,intron_variant,,ENST00000373424,;UGT1A7,intron_variant,,ENST00000373426,;UGT1A8,intron_variant,,ENST00000609637,;UGT1A10,intron_variant,,ENST00000344644,;UGT1A8,intron_variant,,ENST00000373450,;UGT1A9,intron_variant,,ENST00000354728,;UGT1A7,downstream_gene_…	T	ENSG00000167165
UGT1A6	0	.	GRCh37	2	234601668	234601668	+	Silent	SNP	C	C	T	rs773410698	.	COAD		TCGA-G4-6302-01A-11D-1719-10	TCGA-G4-6302-11A-01D-1719-10	C	C	.	.	.	.	.	.	.	.	.	.	.	.	.	.	.	c.18C>T	p.%3D	p.R6R	ENST00000305139	1/5	436	410	26	132	132	0	UGT1A6,synonymous_variant,p.%3D,ENST00000441351,;UGT1A6,synonymous_variant,p.%3D,ENST00000305139,;UGT1A10,intron_variant,,ENST00000373445,;UGT1A6,intron_variant,,ENST00000373424,;UGT1A7,intron_variant,,ENST00000373426,;UGT1A8,intron_variant,,ENST00000609637,;UGT1A10,intron_variant,,ENST00000344644,;UGT1A8,intron_variant,,ENST00000373450,;UGT1A9,intron_variant,,ENST00000354728,;UGT1A7,downstream_g…	T	ENSG00000167165
UGT1A6	0	.	GRCh37	2	234602021	234602021	+	Missense_Mutation	SNP	T	T	C	rs372477458	.	COAD		TCGA-G4-6586-01A-11D-1771-10	TCGA-G4-6586-10A-01D-1771-10	T	T	.	.	.	.	.	.	.	.	.	.	.	.	.	.	.	c.371T>C	p.Ile124Thr	p.I124T	ENST00000305139	1/5	66	47	19	97	97	0	UGT1A6,missense_variant,p.Ile124Thr,ENST00000441351,;UGT1A6,missense_variant,p.Ile124Thr,ENST00000305139,;UGT1A10,intron_variant,,ENST00000373445,;UGT1A6,intron_variant,,ENST00000373424,;UGT1A7,intron_variant,,ENST00000373426,;UGT1A8,intron_variant,,ENST00000609637,;UGT1A10,intron_variant,,ENST00000344644,;UGT1A8,intron_variant,,ENST00000373450,;UGT1A9,intron_variant,,ENST00000354728,;UGT1A7,down…	C	ENSG00000167165
UGT1A6	0	.	GRCh37	2	234601834	234601834	+	Missense_Mutation	SNP	G	G	A	novel	.	ESCA		TCGA-2H-A9GQ-01A-11D-A37C-09	TCGA-2H-A9GQ-11A-11D-A37F-09	G	G	.	.	.	.	.	.	.	.	.	.	.	.	.	.	.	c.184G>A	p.Glu62Lys	p.E62K	ENST00000305139	1/5	54	41	13	50	50	0	UGT1A6,missense_variant,p.Glu62Lys,ENST00000441351,;UGT1A6,missense_variant,p.Glu62Lys,ENST00000305139,;UGT1A10,intron_variant,,ENST00000373445,;UGT1A6,intron_variant,,ENST00000373424,;UGT1A7,intron_variant,,ENST00000373426,;UGT1A8,intron_variant,,ENST00000609637,;UGT1A10,intron_variant,,ENST00000344644,;UGT1A8,intron_variant,,ENST00000373450,;UGT1A9,intron_variant,,ENST00000354728,;UGT1A7,downst…	A	ENSG00000167165
UGT1A6	0	.	GRCh37	2	234602073	234602073	+	Missense_Mutation	SNP	G	G	C	novel	.	ESCA		TCGA-LN-A49S-01A-11D-A247-09	TCGA-LN-A49S-10A-01D-A247-09	G	G	.	.	.	.	.	.	.	.	.	.	.	.	.	.	.	c.423G>C	p.Glu141Asp	p.E141D	ENST00000305139	1/5	44	33	11	61	61	0	UGT1A6,missense_variant,p.Glu141Asp,ENST00000441351,;UGT1A6,missense_variant,p.Glu141Asp,ENST00000305139,;UGT1A10,intron_variant,,ENST00000373445,;UGT1A6,intron_variant,,ENST00000373424,;UGT1A7,intron_variant,,ENST00000373426,;UGT1A8,intron_variant,,ENST00000609637,;UGT1A10,intron_variant,,ENST00000344644,;UGT1A8,intron_variant,,ENST00000373450,;UGT1A9,intron_variant,,ENST00000354728,;UGT1A7,down…	C	ENSG00000167165
UGT1A6	0	.	GRCh37	2	234602272	234602272	+	Nonsense_Mutation	SNP	C	C	T	rs571650145	.	GBM		TCGA-06-0122-01A-01D-1490-08	TCGA-06-0122-10A-01D-1490-08	C	C	.	.	.	.	.	.	.	.	.	.	.	.	.	.	.	c.622C>T	p.Arg208Ter	p.R208*	ENST00000305139	1/5	211	132	78	327	327	0	UGT1A6,stop_gained,p.Arg208Ter,ENST00000305139,;UGT1A10,intron_variant,,ENST00000373445,;UGT1A6,intron_variant,,ENST00000373424,;UGT1A7,intron_variant,,ENST00000373426,;UGT1A8,intron_variant,,ENST00000609637,;UGT1A10,intron_variant,,ENST00000344644,;UGT1A8,intron_variant,,ENST00000373450,;UGT1A9,intron_variant,,ENST00000354728,;UGT1A6,downstream_gene_variant,,ENST00000441351,;UGT1A7,downstream_ge…	T	ENSG00000167165
UGT1A6	0	.	GRCh37	2	234602327	234602327	+	Missense_Mutation	SNP	T	T	G	.	.	GBM		TCGA-76-6192-01A-11D-1696-08	TCGA-76-6192-10A-01D-1696-08	T	T	.	.	.	.	.	.	.	.	.	.	.	.	.	.	.	c.677T>G	p.Phe226Cys	p.F226C	ENST00000305139	1/5	200	159	40	209	209	0	UGT1A6,missense_variant,p.Phe226Cys,ENST00000305139,;UGT1A10,intron_variant,,ENST00000373445,;UGT1A6,intron_variant,,ENST00000373424,;UGT1A7,intron_variant,,ENST00000373426,;UGT1A8,intron_variant,,ENST00000609637,;UGT1A10,intron_variant,,ENST00000344644,;UGT1A8,intron_variant,,ENST00000373450,;UGT1A9,intron_variant,,ENST00000354728,;UGT1A6,downstream_gene_variant,,ENST00000441351,;UGT1A7,downstre…	G	ENSG00000167165
UGT1A6	0	.	GRCh37	2	234602055	234602055	+	Silent	SNP	C	C	A	novel	.	HNSC		TCGA-CN-6010-01A-11D-1683-08	TCGA-CN-6010-10A-01D-1683-08	C	C	.	.	.	.	.	.	.	.	.	.	.	.	.	.	.	c.405C>A	p.%3D	p.T135T	ENST00000305139	1/5	34	30	4	57	57	0	UGT1A6,synonymous_variant,p.%3D,ENST00000441351,;UGT1A6,synonymous_variant,p.%3D,ENST00000305139,;UGT1A10,intron_variant,,ENST00000373445,;UGT1A6,intron_variant,,ENST00000373424,;UGT1A7,intron_variant,,ENST00000373426,;UGT1A8,intron_variant,,ENST00000609637,;UGT1A10,intron_variant,,ENST00000344644,;UGT1A8,intron_variant,,ENST00000373450,;UGT1A9,intron_variant,,ENST00000354728,;UGT1A7,downstream_g…	A	ENSG00000167165
UGT1A6	0	.	GRCh37	2	234602466	234602466	+	Silent	SNP	C	C	T	novel	.	HNSC		TCGA-CV-6441-01A-11D-1683-08	TCGA-CV-6441-11A-01D-1683-08	C	C	.	.	.	.	.	.	.	.	.	.	.	.	.	.	.	c.816C>T	p.%3D	p.V272V	ENST00000305139	1/5	678	415	263	647	647	0	UGT1A6,synonymous_variant,p.%3D,ENST00000305139,;UGT1A6,synonymous_variant,p.%3D,ENST00000373424,;UGT1A6,synonymous_variant,p.%3D,ENST00000406651,;UGT1A10,intron_variant,,ENST00000373445,;UGT1A7,intron_variant,,ENST00000373426,;UGT1A8,intron_variant,,ENST00000609637,;UGT1A10,intron_variant,,ENST00000344644,;UGT1A8,intron_variant,,ENST00000373450,;UGT1A9,intron_variant,,ENST00000354728,;UGT1A6,dow…	T	ENSG00000167165
UGT1A6	0	.	GRCh37	2	234602064	234602064	+	Missense_Mutation	SNP	C	C	G	.	.	HNSC		TCGA-CV-7089-01A-11D-2012-08	TCGA-CV-7089-10A-01D-2013-08	C	C	.	.	.	.	.	.	.	.	.	.	.	.	.	.	.	c.414C>G	p.Phe138Leu	p.F138L	ENST00000305139	1/5	84	74	10	75	75	0	UGT1A6,missense_variant,p.Phe138Leu,ENST00000441351,;UGT1A6,missense_variant,p.Phe138Leu,ENST00000305139,;UGT1A10,intron_variant,,ENST00000373445,;UGT1A6,intron_variant,,ENST00000373424,;UGT1A7,intron_variant,,ENST00000373426,;UGT1A8,intron_variant,,ENST00000609637,;UGT1A10,intron_variant,,ENST00000344644,;UGT1A8,intron_variant,,ENST00000373450,;UGT1A9,intron_variant,,ENST00000354728,;UGT1A7,down…	G	ENSG00000167165
UGT1A6	0	.	GRCh37	2	234601679	234601679	+	Missense_Mutation	SNP	G	G	T	rs377223787	.	HNSC		TCGA-IQ-A61E-01A-22D-A30E-08	TCGA-IQ-A61E-10A-01D-A30H-08	G	G	.	.	.	.	.	.	.	.	.	.	.	.	.	.	.	c.29G>T	p.Arg10Ile	p.R10I	ENST00000305139	1/5	68	63	5	87	87	0	UGT1A6,missense_variant,p.Arg10Ile,ENST00000441351,;UGT1A6,missense_variant,p.Arg10Ile,ENST00000305139,;UGT1A10,intron_variant,,ENST00000373445,;UGT1A6,intron_variant,,ENST00000373424,;UGT1A7,intron_variant,,ENST00000373426,;UGT1A8,intron_variant,,ENST00000609637,;UGT1A10,intron_variant,,ENST00000344644,;UGT1A8,intron_variant,,ENST00000373450,;UGT1A9,intron_variant,,ENST00000354728,;UGT1A7,downst…	T	ENSG00000167165
UGT1A6	0	.	GRCh37	2	234602164	234602164	+	Missense_Mutation	SNP	A	A	G	.	.	KIRC		TCGA-BP-5000-01A-01D-1462-08	TCGA-BP-5000-11A-01D-1462-08	A	A	.	.	.	.	.	.	.	.	.	.	.	.	.	.	.	c.514A>G	p.Arg172Gly	p.R172G	ENST00000305139	1/5	284	208	76	271	271	0	UGT1A6,missense_variant,p.Arg172Gly,ENST00000441351,;UGT1A6,missense_variant,p.Arg172Gly,ENST00000305139,;UGT1A10,intron_variant,,ENST00000373445,;UGT1A6,intron_variant,,ENST00000373424,;UGT1A7,intron_variant,,ENST00000373426,;UGT1A8,intron_variant,,ENST00000609637,;UGT1A10,intron_variant,,ENST00000344644,;UGT1A8,intron_variant,,ENST00000373450,;UGT1A9,intron_variant,,ENST00000354728,;UGT1A7,down…	G	ENSG00000167165
UGT1A6	0	.	GRCh37	2	234602011	234602011	+	Missense_Mutation	SNP	C	C	A	novel	.	KIRP		TCGA-2Z-A9JE-01A-11D-A42J-10	TCGA-2Z-A9JE-10A-01D-A42M-10	C	C	.	.	.	.	.	.	.	.	.	.	.	.	.	.	.	c.361C>A	p.Leu121Met	p.L121M	ENST00000305139	1/5	70	46	24	53	53	0	UGT1A6,missense_variant,p.Leu121Met,ENST00000441351,;UGT1A6,missense_variant,p.Leu121Met,ENST00000305139,;UGT1A10,intron_variant,,ENST00000373445,;UGT1A6,intron_variant,,ENST00000373424,;UGT1A7,intron_variant,,ENST00000373426,;UGT1A8,intron_variant,,ENST00000609637,;UGT1A10,intron_variant,,ENST00000344644,;UGT1A8,intron_variant,,ENST00000373450,;UGT1A9,intron_variant,,ENST00000354728,;UGT1A7,down…	A	ENSG00000167165
UGT1A6	0	.	GRCh37	2	234601562	234601562	+	5'UTR	SNP	A	A	G	novel	.	KIRP		TCGA-HE-A5NH-01A-11D-A26P-10	TCGA-HE-A5NH-10A-01D-A26P-10	A	A	.	.	.	.	.	.	.	.	.	.	.	.	.	.	.	c.-89A>G	.	.	ENST00000305139	1/5	11	7	3	22	22	0	UGT1A6,5_prime_UTR_variant,,ENST00000305139,;UGT1A10,intron_variant,,ENST00000373445,;UGT1A6,intron_variant,,ENST00000441351,;UGT1A6,intron_variant,,ENST00000373424,;UGT1A7,intron_variant,,ENST00000373426,;UGT1A8,intron_variant,,ENST00000609637,;UGT1A10,intron_variant,,ENST00000344644,;UGT1A8,intron_variant,,ENST00000373450,;UGT1A9,intron_variant,,ENST00000354728,;UGT1A7,downstream_gene_variant,,…	G	ENSG00000167165
UGT1A6	0	.	GRCh37	2	234602346	234602346	+	Silent	SNP	C	C	T	rs536034017	.	LGG	1	TCGA-DU-6542-01A-11D-1893-08	TCGA-DU-6542-10A-01D-1893-08	C	C	.	.	.	.	.	.	.	.	.	.	.	.	.	.	.	c.696C>T	p.%3D	p.L232L	ENST00000305139	1/5	190	177	13	289	289	0	UGT1A6,synonymous_variant,p.%3D,ENST00000305139,;UGT1A6,5_prime_UTR_variant,,ENST00000406651,;UGT1A10,intron_variant,,ENST00000373445,;UGT1A6,intron_variant,,ENST00000373424,;UGT1A7,intron_variant,,ENST00000373426,;UGT1A8,intron_variant,,ENST00000609637,;UGT1A10,intron_variant,,ENST00000344644,;UGT1A8,intron_variant,,ENST00000373450,;UGT1A9,intron_variant,,ENST00000354728,;UGT1A6,downstream_gene_…	T	ENSG00000167165
UGT1A6	0	.	GRCh37	2	234602275	234602275	+	Missense_Mutation	SNP	G	G	C	.	.	LGG		TCGA-HT-7478-01A-11D-2024-08	TCGA-HT-7478-10A-01D-2024-08	G	G	.	.	.	.	.	.	.	.	.	.	.	.	.	.	.	c.625G>C	p.Val209Leu	p.V209L	ENST00000305139	1/5	194	129	64	151	151	0	UGT1A6,missense_variant,p.Val209Leu,ENST00000305139,;UGT1A10,intron_variant,,ENST00000373445,;UGT1A6,intron_variant,,ENST00000373424,;UGT1A7,intron_variant,,ENST00000373426,;UGT1A8,intron_variant,,ENST00000609637,;UGT1A10,intron_variant,,ENST00000344644,;UGT1A8,intron_variant,,ENST00000373450,;UGT1A9,intron_variant,,ENST00000354728,;UGT1A6,downstream_gene_variant,,ENST00000441351,;UGT1A7,downstre…	C	ENSG00000167165
UGT1A6	0	.	GRCh37	2	234602084	234602084	+	Missense_Mutation	SNP	A	A	T	rs774532563	.	LUAD		TCGA-17-Z010-01A-01W-0746-08	TCGA-17-Z010-11A-01W-0746-08	A	A	.	.	.	.	.	.	.	.	.	.	.	.	.	.	.	c.434A>T	p.Asp145Val	p.D145V	ENST00000305139	1/5	118	83	35	119	118	1	UGT1A6,missense_variant,p.Asp145Val,ENST00000441351,;UGT1A6,missense_variant,p.Asp145Val,ENST00000305139,;UGT1A10,intron_variant,,ENST00000373445,;UGT1A6,intron_variant,,ENST00000373424,;UGT1A7,intron_variant,,ENST00000373426,;UGT1A8,intron_variant,,ENST00000609637,;UGT1A10,intron_variant,,ENST00000344644,;UGT1A8,intron_variant,,ENST00000373450,;UGT1A9,intron_variant,,ENST00000354728,;UGT1A7,down…	T	ENSG00000167165
UGT1A6	0	.	GRCh37	2	234602162	234602162	+	Missense_Mutation	SNP	T	T	A	.	.	LUAD		TCGA-49-4488-01A-01D-1753-08	TCGA-49-4488-11A-01D-1753-08	T	T	.	.	.	.	.	.	.	.	.	.	.	.	.	.	.	c.512T>A	p.Phe171Tyr	p.F171Y	ENST00000305139	1/5	183	135	48	186	185	1	UGT1A6,missense_variant,p.Phe171Tyr,ENST00000441351,;UGT1A6,missense_variant,p.Phe171Tyr,ENST00000305139,;UGT1A10,intron_variant,,ENST00000373445,;UGT1A6,intron_variant,,ENST00000373424,;UGT1A7,intron_variant,,ENST00000373426,;UGT1A8,intron_variant,,ENST00000609637,;UGT1A10,intron_variant,,ENST00000344644,;UGT1A8,intron_variant,,ENST00000373450,;UGT1A9,intron_variant,,ENST00000354728,;UGT1A7,down…	A	ENSG00000167165
UGT1A6	0	.	GRCh37	2	234601751	234601751	+	Missense_Mutation	SNP	A	A	T	.	.	LUAD		TCGA-53-7624-01A-11D-2063-08	TCGA-53-7624-10A-01D-2063-08	A	A	.	.	.	.	.	.	.	.	.	.	.	.	.	.	.	c.101A>T	p.Gln34Leu	p.Q34L	ENST00000305139	1/5	83	44	39	47	47	0	UGT1A6,missense_variant,p.Gln34Leu,ENST00000441351,;UGT1A6,missense_variant,p.Gln34Leu,ENST00000305139,;UGT1A10,intron_variant,,ENST00000373445,;UGT1A6,intron_variant,,ENST00000373424,;UGT1A7,intron_variant,,ENST00000373426,;UGT1A8,intron_variant,,ENST00000609637,;UGT1A10,intron_variant,,ENST00000344644,;UGT1A8,intron_variant,,ENST00000373450,;UGT1A9,intron_variant,,ENST00000354728,;UGT1A7,downst…	T	ENSG00000167165
UGT1A6	0	.	GRCh37	2	234602290	234602290	+	Missense_Mutation	SNP	G	G	C	rs775312118	.	LUAD		TCGA-80-5611-01A-01D-1625-08	TCGA-80-5611-10A-01D-1625-08	G	G	.	.	.	.	.	.	.	.	.	.	.	.	.	.	.	c.640G>C	p.Val214Leu	p.V214L	ENST00000305139	1/5	128	108	20	125	125	0	UGT1A6,missense_variant,p.Val214Leu,ENST00000305139,;UGT1A10,intron_variant,,ENST00000373445,;UGT1A6,intron_variant,,ENST00000373424,;UGT1A7,intron_variant,,ENST00000373426,;UGT1A8,intron_variant,,ENST00000609637,;UGT1A10,intron_variant,,ENST00000344644,;UGT1A8,intron_variant,,ENST00000373450,;UGT1A9,intron_variant,,ENST00000354728,;UGT1A6,downstream_gene_variant,,ENST00000441351,;UGT1A7,downstre…	C	ENSG00000167165
UGT1A6	0	.	GRCh37	2	234602232	234602232	+	Missense_Mutation	SNP	G	G	C	novel	.	LUAD		TCGA-L9-A7SV-01A-11D-A397-08	TCGA-L9-A7SV-10A-01D-A39A-08	G	G	.	.	.	.	.	.	.	.	.	.	.	.	.	.	.	c.582G>C	p.Arg194Ser	p.R194S	ENST00000305139	1/5	183	129	54	111	111	0	UGT1A6,missense_variant,p.Arg194Ser,ENST00000305139,;UGT1A10,intron_variant,,ENST00000373445,;UGT1A6,intron_variant,,ENST00000373424,;UGT1A7,intron_variant,,ENST00000373426,;UGT1A8,intron_variant,,ENST00000609637,;UGT1A10,intron_variant,,ENST00000344644,;UGT1A8,intron_variant,,ENST00000373450,;UGT1A9,intron_variant,,ENST00000354728,;UGT1A6,downstream_gene_variant,,ENST00000441351,;UGT1A7,downstre…	C	ENSG00000167165
UGT1A6	0	.	GRCh37	2	234601712	234601712	+	Missense_Mutation	SNP	G	G	T	novel	.	LUSC		TCGA-18-3412-01A-01D-0983-08	TCGA-18-3412-11A-01D-0983-08	G	G	.	.	.	.	.	.	.	.	.	.	.	.	.	.	.	c.62G>T	p.Trp21Leu	p.W21L	ENST00000305139	1/5	41	37	4	46	46	0	UGT1A6,missense_variant,p.Trp21Leu,ENST00000441351,;UGT1A6,missense_variant,p.Trp21Leu,ENST00000305139,;UGT1A10,intron_variant,,ENST00000373445,;UGT1A6,intron_variant,,ENST00000373424,;UGT1A7,intron_variant,,ENST00000373426,;UGT1A8,intron_variant,,ENST00000609637,;UGT1A10,intron_variant,,ENST00000344644,;UGT1A8,intron_variant,,ENST00000373450,;UGT1A9,intron_variant,,ENST00000354728,;UGT1A7,downst…	T	ENSG00000167165
UGT1A6	0	.	GRCh37	2	234601653	234601653	+	Translation_Start_Site	SNP	G	G	T	.	.	LUSC		TCGA-43-2578-01A-01D-1522-08	TCGA-43-2578-11A-01D-1522-08	G	G	.	.	.	.	.	.	.	.	.	.	.	.	.	.	.	c.3G>T	p.Met1?	p.M1?	ENST00000305139	1/5	173	133	40	146	146	0	UGT1A6,start_lost,p.Met1?,ENST00000441351,;UGT1A6,start_lost,p.Met1?,ENST00000305139,;UGT1A10,intron_variant,,ENST00000373445,;UGT1A6,intron_variant,,ENST00000373424,;UGT1A7,intron_variant,,ENST00000373426,;UGT1A8,intron_variant,,ENST00000609637,;UGT1A10,intron_variant,,ENST00000344644,;UGT1A8,intron_variant,,ENST00000373450,;UGT1A9,intron_variant,,ENST00000354728,;UGT1A7,downstream_gene_variant,…	T	ENSG00000167165
UGT1A6	0	.	GRCh37	2	234601885	234601885	+	Missense_Mutation	SNP	C	C	G	novel	.	LUSC		TCGA-56-7822-01A-11D-2122-08	TCGA-56-7822-10A-01D-2122-08	C	C	.	.	.	.	.	.	.	.	.	.	.	.	.	.	.	c.235C>G	p.Pro79Ala	p.P79A	ENST00000305139	1/5	77	60	17	103	103	0	UGT1A6,missense_variant,p.Pro79Ala,ENST00000441351,;UGT1A6,missense_variant,p.Pro79Ala,ENST00000305139,;UGT1A10,intron_variant,,ENST00000373445,;UGT1A6,intron_variant,,ENST00000373424,;UGT1A7,intron_variant,,ENST00000373426,;UGT1A8,intron_variant,,ENST00000609637,;UGT1A10,intron_variant,,ENST00000344644,;UGT1A8,intron_variant,,ENST00000373450,;UGT1A9,intron_variant,,ENST00000354728,;UGT1A7,downst…	G	ENSG00000167165
UGT1A6	0	.	GRCh37	2	234601821	234601821	+	Silent	SNP	A	A	G	novel	.	LUSC		TCGA-68-7755-01A-11D-2122-08	TCGA-68-7755-10A-01D-2122-08	A	A	.	.	.	.	.	.	.	.	.	.	.	.	.	.	.	c.171A>G	p.%3D	p.V57V	ENST00000305139	1/5	58	25	32	87	87	0	UGT1A6,synonymous_variant,p.%3D,ENST00000441351,;UGT1A6,synonymous_variant,p.%3D,ENST00000305139,;UGT1A10,intron_variant,,ENST00000373445,;UGT1A6,intron_variant,,ENST00000373424,;UGT1A7,intron_variant,,ENST00000373426,;UGT1A8,intron_variant,,ENST00000609637,;UGT1A10,intron_variant,,ENST00000344644,;UGT1A8,intron_variant,,ENST00000373450,;UGT1A9,intron_variant,,ENST00000354728,;UGT1A7,downstream_g…	G	ENSG00000167165
UGT1A6	0	.	GRCh37	2	234601749	234601749	+	Silent	SNP	T	T	G	novel	.	SKCM primary		TCGA-BF-AAP7-01A-11D-A401-08	TCGA-BF-AAP7-10A-01D-A401-08	T	T	.	.	.	.	.	.	.	.	.	.	.	.	.	.	.	c.99T>G	p.%3D	p.P33P	ENST00000305139	1/5	73	62	11	58	58	0	UGT1A6,synonymous_variant,p.%3D,ENST00000441351,;UGT1A6,synonymous_variant,p.%3D,ENST00000305139,;UGT1A10,intron_variant,,ENST00000373445,;UGT1A6,intron_variant,,ENST00000373424,;UGT1A7,intron_variant,,ENST00000373426,;UGT1A8,intron_variant,,ENST00000609637,;UGT1A10,intron_variant,,ENST00000344644,;UGT1A8,intron_variant,,ENST00000373450,;UGT1A9,intron_variant,,ENST00000354728,;UGT1A7,downstream_g…	G	ENSG00000167165
UGT1A6	0	.	GRCh37	2	234601555	234601555	+	5'UTR	SNP	G	G	A	novel	.	SKCM primary		TCGA-EB-A3Y6-01A-21D-A23B-08	TCGA-EB-A3Y6-10A-01D-A23B-08	G	G	.	.	.	.	.	.	.	.	.	.	.	.	.	.	.	c.-96G>A	.	.	ENST00000305139	1/5	26	19	7	23	23	0	UGT1A6,5_prime_UTR_variant,,ENST00000305139,;UGT1A10,intron_variant,,ENST00000373445,;UGT1A6,intron_variant,,ENST00000441351,;UGT1A6,intron_variant,,ENST00000373424,;UGT1A7,intron_variant,,ENST00000373426,;UGT1A8,intron_variant,,ENST00000609637,;UGT1A10,intron_variant,,ENST00000344644,;UGT1A8,intron_variant,,ENST00000373450,;UGT1A9,intron_variant,,ENST00000354728,;UGT1A7,downstream_gene_variant,,…	A	ENSG00000167165
UGT1A6	0	.	GRCh37	2	234602101	234602101	+	Missense_Mutation	SNP	C	C	T	rs773557629	.	SKCM-Metastatic		TCGA-D3-A3C3-06A-12D-A19A-08	TCGA-D3-A3C3-10A-01D-A19A-08	C	C	.	.	.	.	.	.	.	.	.	.	.	.	.	.	.	c.451C>T	p.Pro151Ser	p.P151S	ENST00000305139	1/5	109	88	20	98	98	0	UGT1A6,missense_variant,p.Pro151Ser,ENST00000441351,;UGT1A6,missense_variant,p.Pro151Ser,ENST00000305139,;UGT1A10,intron_variant,,ENST00000373445,;UGT1A6,intron_variant,,ENST00000373424,;UGT1A7,intron_variant,,ENST00000373426,;UGT1A8,intron_variant,,ENST00000609637,;UGT1A10,intron_variant,,ENST00000344644,;UGT1A8,intron_variant,,ENST00000373450,;UGT1A9,intron_variant,,ENST00000354728,;UGT1A7,down…	T	ENSG00000167165
UGT1A6	0	.	GRCh37	2	234602163	234602163	+	Silent	SNP	C	C	T	.	.	SKCM-Metastatic		TCGA-D3-A3ML-06A-11D-A21A-08	TCGA-D3-A3ML-10A-01D-A21A-08	C	C	.	.	.	.	.	.	.	.	.	.	.	.	.	.	.	c.513C>T	p.%3D	p.F171F	ENST00000305139	1/5	361	241	120	162	162	0	UGT1A6,synonymous_variant,p.%3D,ENST00000441351,;UGT1A6,synonymous_variant,p.%3D,ENST00000305139,;UGT1A10,intron_variant,,ENST00000373445,;UGT1A6,intron_variant,,ENST00000373424,;UGT1A7,intron_variant,,ENST00000373426,;UGT1A8,intron_variant,,ENST00000609637,;UGT1A10,intron_variant,,ENST00000344644,;UGT1A8,intron_variant,,ENST00000373450,;UGT1A9,intron_variant,,ENST00000354728,;UGT1A7,downstream_g…	T	ENSG00000167165
UGT1A6	0	.	GRCh37	2	234602173	234602173	+	Missense_Mutation	SNP	C	C	T	rs775014681	.	SKCM-Metastatic		TCGA-D3-A5GL-06A-11D-A27K-08	TCGA-D3-A5GL-10A-01D-A27N-08	C	C	.	.	.	.	.	.	.	.	.	.	.	.	.	.	.	c.523C>T	p.Pro175Ser	p.P175S	ENST00000305139	1/5	183	32	150	159	159	0	UGT1A6,missense_variant,p.Pro175Ser,ENST00000441351,;UGT1A6,missense_variant,p.Pro175Ser,ENST00000305139,;UGT1A10,intron_variant,,ENST00000373445,;UGT1A6,intron_variant,,ENST00000373424,;UGT1A7,intron_variant,,ENST00000373426,;UGT1A8,intron_variant,,ENST00000609637,;UGT1A10,intron_variant,,ENST00000344644,;UGT1A8,intron_variant,,ENST00000373450,;UGT1A9,intron_variant,,ENST00000354728,;UGT1A7,down…	T	ENSG00000167165
UGT1A6	0	.	GRCh37	2	234601617	234601617	+	5'UTR	SNP	C	C	T	novel	.	SKCM-Metastatic		TCGA-D3-A5GS-06A-11D-A27K-08	TCGA-D3-A5GS-10A-01D-A27N-08	C	C	.	.	.	.	.	.	.	.	.	.	.	.	.	.	.	c.-34C>T	.	.	ENST00000305139	1/5	28	21	6	41	41	0	UGT1A6,5_prime_UTR_variant,,ENST00000305139,;UGT1A10,intron_variant,,ENST00000373445,;UGT1A6,intron_variant,,ENST00000441351,;UGT1A6,intron_variant,,ENST00000373424,;UGT1A7,intron_variant,,ENST00000373426,;UGT1A8,intron_variant,,ENST00000609637,;UGT1A10,intron_variant,,ENST00000344644,;UGT1A8,intron_variant,,ENST00000373450,;UGT1A9,intron_variant,,ENST00000354728,;UGT1A7,downstream_gene_variant,,…	T	ENSG00000167165
UGT1A6	0	.	GRCh37	2	234601615	234601615	+	5'UTR	SNP	C	C	T	novel	.	SKCM-Metastatic		TCGA-D3-A8GI-06A-11D-A372-08	TCGA-D3-A8GI-10A-01D-A375-08	C	C	.	.	.	.	.	.	.	.	.	.	.	.	.	.	.	c.-36C>T	.	.	ENST00000305139	1/5	49	21	27	68	68	0	UGT1A6,5_prime_UTR_variant,,ENST00000305139,;UGT1A10,intron_variant,,ENST00000373445,;UGT1A6,intron_variant,,ENST00000441351,;UGT1A6,intron_variant,,ENST00000373424,;UGT1A7,intron_variant,,ENST00000373426,;UGT1A8,intron_variant,,ENST00000609637,;UGT1A10,intron_variant,,ENST00000344644,;UGT1A8,intron_variant,,ENST00000373450,;UGT1A9,intron_variant,,ENST00000354728,;UGT1A7,downstream_gene_variant,,…	T	ENSG00000167165
UGT1A6	0	.	GRCh37	2	234601813	234601813	+	Missense_Mutation	SNP	G	G	A	novel	.	SKCM-Metastatic		TCGA-D3-A8GI-06A-11D-A372-08	TCGA-D3-A8GI-10A-01D-A375-08	G	G	.	.	.	.	.	.	.	.	.	.	.	.	.	.	.	c.163G>A	p.Glu55Lys	p.E55K	ENST00000305139	1/5	95	66	28	82	82	0	UGT1A6,missense_variant,p.Glu55Lys,ENST00000441351,;UGT1A6,missense_variant,p.Glu55Lys,ENST00000305139,;UGT1A10,intron_variant,,ENST00000373445,;UGT1A6,intron_variant,,ENST00000373424,;UGT1A7,intron_variant,,ENST00000373426,;UGT1A8,intron_variant,,ENST00000609637,;UGT1A10,intron_variant,,ENST00000344644,;UGT1A8,intron_variant,,ENST00000373450,;UGT1A9,intron_variant,,ENST00000354728,;UGT1A7,downst…	A	ENSG00000167165
UGT1A6	0	.	GRCh37	2	234601955	234601955	+	Missense_Mutation	SNP	G	G	A	novel	.	SKCM-Metastatic		TCGA-D3-A8GI-06A-11D-A372-08	TCGA-D3-A8GI-10A-01D-A375-08	G	G	.	.	.	.	.	.	.	.	.	.	.	.	.	.	.	c.305G>A	p.Arg102Gln	p.R102Q	ENST00000305139	1/5	84	40	43	77	77	0	UGT1A6,missense_variant,p.Arg102Gln,ENST00000441351,;UGT1A6,missense_variant,p.Arg102Gln,ENST00000305139,;UGT1A10,intron_variant,,ENST00000373445,;UGT1A6,intron_variant,,ENST00000373424,;UGT1A7,intron_variant,,ENST00000373426,;UGT1A8,intron_variant,,ENST00000609637,;UGT1A10,intron_variant,,ENST00000344644,;UGT1A8,intron_variant,,ENST00000373450,;UGT1A9,intron_variant,,ENST00000354728,;UGT1A7,down…	A	ENSG00000167165
UGT1A6	0	.	GRCh37	2	234602165	234602165	+	Missense_Mutation	SNP	G	G	A	novel	.	SKCM-Metastatic		TCGA-D3-A8GM-06A-11D-A372-08	TCGA-D3-A8GM-10A-01D-A375-08	G	G	.	.	.	.	.	.	.	.	.	.	.	.	.	.	.	c.515G>A	p.Arg172Lys	p.R172K	ENST00000305139	1/5	180	139	40	187	187	0	UGT1A6,missense_variant,p.Arg172Lys,ENST00000441351,;UGT1A6,missense_variant,p.Arg172Lys,ENST00000305139,;UGT1A10,intron_variant,,ENST00000373445,;UGT1A6,intron_variant,,ENST00000373424,;UGT1A7,intron_variant,,ENST00000373426,;UGT1A8,intron_variant,,ENST00000609637,;UGT1A10,intron_variant,,ENST00000344644,;UGT1A8,intron_variant,,ENST00000373450,;UGT1A9,intron_variant,,ENST00000354728,;UGT1A7,down…	A	ENSG00000167165
UGT1A6	0	.	GRCh37	2	234602338	234602338	+	Missense_Mutation	SNP	G	G	A	novel	.	SKCM-Metastatic		TCGA-D3-A8GQ-06A-11D-A372-08	TCGA-D3-A8GQ-10A-01D-A375-08	G	G	.	.	.	.	.	.	.	.	.	.	.	.	.	.	.	c.688G>A	p.Glu230Lys	p.E230K	ENST00000305139	1/5	251	128	122	218	218	0	UGT1A6,missense_variant,p.Glu230Lys,ENST00000305139,;UGT1A6,5_prime_UTR_variant,,ENST00000406651,;UGT1A10,intron_variant,,ENST00000373445,;UGT1A6,intron_variant,,ENST00000373424,;UGT1A7,intron_variant,,ENST00000373426,;UGT1A8,intron_variant,,ENST00000609637,;UGT1A10,intron_variant,,ENST00000344644,;UGT1A8,intron_variant,,ENST00000373450,;UGT1A9,intron_variant,,ENST00000354728,;UGT1A6,downstream_g…	A	ENSG00000167165
UGT1A6	0	.	GRCh37	2	234602064	234602064	+	Silent	SNP	C	C	T	.	.	SKCM-Metastatic		TCGA-D9-A1JW-06A-11D-A19A-08	TCGA-D9-A1JW-10A-01D-A19A-08	C	C	.	.	.	.	.	.	.	.	.	.	.	.	.	.	.	c.414C>T	p.%3D	p.F138F	ENST00000305139	1/5	69	54	15	66	66	0	UGT1A6,synonymous_variant,p.%3D,ENST00000441351,;UGT1A6,synonymous_variant,p.%3D,ENST00000305139,;UGT1A10,intron_variant,,ENST00000373445,;UGT1A6,intron_variant,,ENST00000373424,;UGT1A7,intron_variant,,ENST00000373426,;UGT1A8,intron_variant,,ENST00000609637,;UGT1A10,intron_variant,,ENST00000344644,;UGT1A8,intron_variant,,ENST00000373450,;UGT1A9,intron_variant,,ENST00000354728,;UGT1A7,downstream_g…	T	ENSG00000167165
UGT1A6	0	.	GRCh37	2	234602022	234602022	+	Silent	SNP	C	C	T	.	.	SKCM-Metastatic		TCGA-EE-A29D-06A-11D-A197-08	TCGA-EE-A29D-10A-01D-A199-08	C	C	.	.	.	.	.	.	.	.	.	.	.	.	.	.	.	c.372C>T	p.%3D	p.I124I	ENST00000305139	1/5	36	27	8	39	39	0	UGT1A6,synonymous_variant,p.%3D,ENST00000441351,;UGT1A6,synonymous_variant,p.%3D,ENST00000305139,;UGT1A10,intron_variant,,ENST00000373445,;UGT1A6,intron_variant,,ENST00000373424,;UGT1A7,intron_variant,,ENST00000373426,;UGT1A8,intron_variant,,ENST00000609637,;UGT1A10,intron_variant,,ENST00000344644,;UGT1A8,intron_variant,,ENST00000373450,;UGT1A9,intron_variant,,ENST00000354728,;UGT1A7,downstream_g…	T	ENSG00000167165
UGT1A6	0	.	GRCh37	2	234601555	234601555	+	5'UTR	SNP	G	G	A	novel	.	SKCM-Metastatic		TCGA-EE-A29L-06A-12D-A196-08	TCGA-EE-A29L-10A-01D-A198-08	G	G	.	.	.	.	.	.	.	.	.	.	.	.	.	.	.	c.-96G>A	.	.	ENST00000305139	1/5	18	13	5	9	9	0	UGT1A6,5_prime_UTR_variant,,ENST00000305139,;UGT1A10,intron_variant,,ENST00000373445,;UGT1A6,intron_variant,,ENST00000441351,;UGT1A6,intron_variant,,ENST00000373424,;UGT1A7,intron_variant,,ENST00000373426,;UGT1A8,intron_variant,,ENST00000609637,;UGT1A10,intron_variant,,ENST00000344644,;UGT1A8,intron_variant,,ENST00000373450,;UGT1A9,intron_variant,,ENST00000354728,;UGT1A7,downstream_gene_variant,,…	A	ENSG00000167165
UGT1A6	0	.	GRCh37	2	234601598	234601598	+	5'UTR	SNP	G	G	A	novel	.	SKCM-Metastatic		TCGA-EE-A2GC-06A-11D-A197-08	TCGA-EE-A2GC-10A-01D-A199-08	G	G	.	.	.	.	.	.	.	.	.	.	.	.	.	.	.	c.-53G>A	.	.	ENST00000305139	1/5	30	15	14	42	42	0	UGT1A6,5_prime_UTR_variant,,ENST00000305139,;UGT1A10,intron_variant,,ENST00000373445,;UGT1A6,intron_variant,,ENST00000441351,;UGT1A6,intron_variant,,ENST00000373424,;UGT1A7,intron_variant,,ENST00000373426,;UGT1A8,intron_variant,,ENST00000609637,;UGT1A10,intron_variant,,ENST00000344644,;UGT1A8,intron_variant,,ENST00000373450,;UGT1A9,intron_variant,,ENST00000354728,;UGT1A7,downstream_gene_variant,,…	A	ENSG00000167165
UGT1A6	0	.	GRCh37	2	234602351	234602351	+	Missense_Mutation	SNP	C	C	T	.	.	SKCM-Metastatic		TCGA-EE-A2MJ-06A-11D-A197-08	TCGA-EE-A2MJ-10A-01D-A199-08	C	C	.	.	.	.	.	.	.	.	.	.	.	.	.	.	.	c.701C>T	p.Ser234Leu	p.S234L	ENST00000305139	1/5	159	135	23	181	181	0	UGT1A6,missense_variant,p.Ser234Leu,ENST00000305139,;UGT1A6,5_prime_UTR_variant,,ENST00000406651,;UGT1A10,intron_variant,,ENST00000373445,;UGT1A6,intron_variant,,ENST00000373424,;UGT1A7,intron_variant,,ENST00000373426,;UGT1A8,intron_variant,,ENST00000609637,;UGT1A10,intron_variant,,ENST00000344644,;UGT1A8,intron_variant,,ENST00000373450,;UGT1A9,intron_variant,,ENST00000354728,;UGT1A6,downstream_g…	T	ENSG00000167165
UGT1A6	0	.	GRCh37	2	234601577	234601577	+	5'UTR	SNP	G	G	A	novel	.	SKCM-Metastatic		TCGA-EE-A3J5-06A-11D-A20D-08	TCGA-EE-A3J5-10A-01D-A20D-08	G	G	.	.	.	.	.	.	.	.	.	.	.	.	.	.	.	c.-74G>A	.	.	ENST00000305139	1/5	29	20	9	15	15	0	UGT1A6,5_prime_UTR_variant,,ENST00000305139,;UGT1A10,intron_variant,,ENST00000373445,;UGT1A6,intron_variant,,ENST00000441351,;UGT1A6,intron_variant,,ENST00000373424,;UGT1A7,intron_variant,,ENST00000373426,;UGT1A8,intron_variant,,ENST00000609637,;UGT1A10,intron_variant,,ENST00000344644,;UGT1A8,intron_variant,,ENST00000373450,;UGT1A9,intron_variant,,ENST00000354728,;UGT1A7,downstream_gene_variant,,…	A	ENSG00000167165
UGT1A6	0	.	GRCh37	2	234602180	234602180	+	Missense_Mutation	SNP	C	C	T	rs74429718	.	SKCM-Metastatic		TCGA-EE-A3J7-06A-11D-A20D-08	TCGA-EE-A3J7-10A-01D-A20D-08	C	C	.	.	.	.	.	.	.	.	.	.	.	.	.	.	.	c.530C>T	p.Ser177Phe	p.S177F	ENST00000305139	1/5	154	111	43	238	238	0	UGT1A6,missense_variant,p.Ser177Phe,ENST00000441351,;UGT1A6,missense_variant,p.Ser177Phe,ENST00000305139,;UGT1A10,intron_variant,,ENST00000373445,;UGT1A6,intron_variant,,ENST00000373424,;UGT1A7,intron_variant,,ENST00000373426,;UGT1A8,intron_variant,,ENST00000609637,;UGT1A10,intron_variant,,ENST00000344644,;UGT1A8,intron_variant,,ENST00000373450,;UGT1A9,intron_variant,,ENST00000354728,;UGT1A7,down…	T	ENSG00000167165
UGT1A6	0	.	GRCh37	2	234602181	234602181	+	Silent	SNP	C	C	T	.	.	SKCM-Metastatic		TCGA-EE-A3J7-06A-11D-A20D-08	TCGA-EE-A3J7-10A-01D-A20D-08	C	C	.	.	.	.	.	.	.	.	.	.	.	.	.	.	.	c.531C>T	p.%3D	p.S177S	ENST00000305139	1/5	152	110	42	239	239	0	UGT1A6,synonymous_variant,p.%3D,ENST00000441351,;UGT1A6,synonymous_variant,p.%3D,ENST00000305139,;UGT1A10,intron_variant,,ENST00000373445,;UGT1A6,intron_variant,,ENST00000373424,;UGT1A7,intron_variant,,ENST00000373426,;UGT1A8,intron_variant,,ENST00000609637,;UGT1A10,intron_variant,,ENST00000344644,;UGT1A8,intron_variant,,ENST00000373450,;UGT1A9,intron_variant,,ENST00000354728,;UGT1A7,downstream_g…	T	ENSG00000167165
[truncated: 2,945 more rows]
[truncated: 66 more columns]

## Sheet: 1As list by coordinates by DGH 
Hugo_Symbol	Entrez_Gene_Id	Center	NCBI_Build	Chromosome	Start_Position	End_Position	Strand	Variant_Classification	Variant_Type	Reference_Allele	Tumor_Seq_Allele1	Tumor_Seq_Allele2	dbSNP_RS	dbSNP_Val_Status	TCGA Cancer type		Tumor_Sample_Barcode	Matched_Norm_Sample_Barcode	Match_Norm_Seq_Allele1	Match_Norm_Seq_Allele2	Tumor_Validation_Allele1	Tumor_Validation_Allele2	Match_Norm_Validation_Allele1	Match_Norm_Validation_Allele2	Verification_Status	Validation_Status	Mutation_Status	Sequencing_Phase	Sequence_Source	Validation_Method	Score	BAM_File	Sequencer	Tumor_Sample_UUID	Matched_Norm_Sample_UUID	HGVSc	HGVSp	HGVSp_Short	Transcript_ID	Exon_Number	t_depth	t_ref_count	t_alt_count	n_depth	n_ref_count	n_alt_count	all_effects	Allele	Gene
[truncated: 978 more rows]
[truncated: 66 more columns]

[truncated: 28 more sheets: conflicting results, 1A8, 1A10, 1A9, 1A7, 1A6, 1A5, 1A4, 1A3, 1A1, 1A1 Exons 2-5, 1A Es 2-5 annotated by 1A1 cDNA, non1As but defined as 1As, 2A1, 2A2, 2A Exons 2-6, 2A3, 2B4, 2B7, 2B10 …]
