# Supplementary material for: The Somatic Mutation Landscape of UDP-Glycosyltransferase (UGT) Genes in Human Cancers
Source: Cancers (Basel). 2022 Nov 21;14(22):5708. doi: 10.3390/cancers14225708 (PMC9688768; doi:10.3390/cancers14225708)
Supplement: Supplementary file 1 [file cancers-14-05708-s001.zip › Table S5.xlsx]

## Sheet: Title 
Table S5: The CCLE cell lines assessed by this study and the mutations found in these cell lines for each of the 22 UGT genes.

## Sheet: 1568 CCLE
Study ID	Patient ID	Sample ID	Cancer Type
ccle_broad_2019	DMS53_LUNG	DMS53_LUNG	Small Cell Lung Cancer
ccle_broad_2019	SW1116_LARGE_INTESTINE	SW1116_LARGE_INTESTINE	Colorectal Cancer
ccle_broad_2019	NCIH1694_LUNG	NCIH1694_LUNG	Small Cell Lung Cancer
ccle_broad_2019	P3HR1_HAEMATOPOIETIC_AND_LYMPHOID_TISSUE	P3HR1_HAEMATOPOIETIC_AND_LYMPHOID_TISSUE	Mature B-Cell Neoplasms
ccle_broad_2019	HUT78_HAEMATOPOIETIC_AND_LYMPHOID_TISSUE	HUT78_HAEMATOPOIETIC_AND_LYMPHOID_TISSUE	T-Lymphoblastic Leukemia/Lymphoma
ccle_broad_2019	UMUC3_URINARY_TRACT	UMUC3_URINARY_TRACT	Bladder Cancer
ccle_broad_2019	HOS_BONE	HOS_BONE	Bone Cancer
ccle_broad_2019	HUNS1_HAEMATOPOIETIC_AND_LYMPHOID_TISSUE	HUNS1_HAEMATOPOIETIC_AND_LYMPHOID_TISSUE	Mature B-Cell Neoplasms
ccle_broad_2019	AML193_HAEMATOPOIETIC_AND_LYMPHOID_TISSUE	AML193_HAEMATOPOIETIC_AND_LYMPHOID_TISSUE	Leukemia
ccle_broad_2019	RVH421_SKIN	RVH421_SKIN	Melanoma
ccle_broad_2019	NCIH1184_LUNG	NCIH1184_LUNG	Small Cell Lung Cancer
ccle_broad_2019	HCC2157_BREAST	HCC2157_BREAST	Breast Cancer
ccle_broad_2019	TC71_BONE	TC71_BONE	Bone Cancer
ccle_broad_2019	NCIH2227_LUNG	NCIH2227_LUNG	Small Cell Lung Cancer
ccle_broad_2019	COLO205_LARGE_INTESTINE	COLO205_LARGE_INTESTINE	Colorectal Cancer
ccle_broad_2019	SNU449_LIVER	SNU449_LIVER	Hepatobiliary Cancer
ccle_broad_2019	NCIH28_PLEURA	NCIH28_PLEURA	Mesothelioma
ccle_broad_2019	OV56_OVARY	OV56_OVARY	Ovarian Cancer
ccle_broad_2019	JHOS4_OVARY	JHOS4_OVARY	Ovarian Cancer
ccle_broad_2019	KYSE450_OESOPHAGUS	KYSE450_OESOPHAGUS	Esophagogastric Cancer
ccle_broad_2019	RMUGS_OVARY	RMUGS_OVARY	Ovarian Cancer
ccle_broad_2019	KLE_ENDOMETRIUM	KLE_ENDOMETRIUM	Endometrial Cancer
ccle_broad_2019	HS895T_FIBROBLAST	HS895T_FIBROBLAST	Melanoma
ccle_broad_2019	LN229_CENTRAL_NERVOUS_SYSTEM	LN229_CENTRAL_NERVOUS_SYSTEM	Glioma
ccle_broad_2019	P31FUJ_HAEMATOPOIETIC_AND_LYMPHOID_TISSUE	P31FUJ_HAEMATOPOIETIC_AND_LYMPHOID_TISSUE	Leukemia
ccle_broad_2019	RKN_SOFT_TISSUE	RKN_SOFT_TISSUE	Ovarian Cancer
ccle_broad_2019	PATU8988S_PANCREAS	PATU8988S_PANCREAS	Pancreatic Cancer
ccle_broad_2019	NH6_AUTONOMIC_GANGLIA	NH6_AUTONOMIC_GANGLIA	Neuroblastoma
ccle_broad_2019	SF126_CENTRAL_NERVOUS_SYSTEM	SF126_CENTRAL_NERVOUS_SYSTEM	Glioma
ccle_broad_2019	RERFLCAD2_LUNG	RERFLCAD2_LUNG	Non-Small Cell Lung Cancer
ccle_broad_2019	OUMS23_LARGE_INTESTINE	OUMS23_LARGE_INTESTINE	Colorectal Cancer
ccle_broad_2019	SNGM_ENDOMETRIUM	SNGM_ENDOMETRIUM	Endometrial Cancer
ccle_broad_2019	OUMS27_BONE	OUMS27_BONE	Bone Cancer
ccle_broad_2019	NCIH2347_LUNG	NCIH2347_LUNG	Non-Small Cell Lung Cancer
ccle_broad_2019	SW1990_PANCREAS	SW1990_PANCREAS	Pancreatic Cancer
ccle_broad_2019	HS940T_FIBROBLAST	HS940T_FIBROBLAST	Melanoma
ccle_broad_2019	HS611T_HAEMATOPOIETIC_AND_LYMPHOID_TISSUE	HS611T_HAEMATOPOIETIC_AND_LYMPHOID_TISSUE	Hodgkin Lymphoma
ccle_broad_2019	TOLEDO_HAEMATOPOIETIC_AND_LYMPHOID_TISSUE	TOLEDO_HAEMATOPOIETIC_AND_LYMPHOID_TISSUE	Mature B-Cell Neoplasms
ccle_broad_2019	RERFGC1B_STOMACH	RERFGC1B_STOMACH	Esophagogastric Cancer
ccle_broad_2019	HT1080_SOFT_TISSUE	HT1080_SOFT_TISSUE	Soft Tissue Sarcoma
ccle_broad_2019	NCIH2087_LUNG	NCIH2087_LUNG	Non-Small Cell Lung Cancer
ccle_broad_2019	COV318_OVARY	COV318_OVARY	Ovarian Cancer
ccle_broad_2019	NCIH2085_LUNG	NCIH2085_LUNG	Non-Small Cell Lung Cancer
ccle_broad_2019	NCIH510_LUNG	NCIH510_LUNG	Small Cell Lung Cancer
ccle_broad_2019	CAKI1_KIDNEY	CAKI1_KIDNEY	Renal Cell Carcinoma
ccle_broad_2019	NCIH716_LARGE_INTESTINE	NCIH716_LARGE_INTESTINE	Colorectal Cancer
ccle_broad_2019	NCIH2066_LUNG	NCIH2066_LUNG	Small Cell Lung Cancer
ccle_broad_2019	NCIH1341_LUNG	NCIH1341_LUNG	Small Cell Lung Cancer
ccle_broad_2019	NCIH2029_LUNG	NCIH2029_LUNG	Small Cell Lung Cancer
ccle_broad_2019	C3A_LIVER	C3A_LIVER	Hepatobiliary Cancer
ccle_broad_2019	SW480_LARGE_INTESTINE	SW480_LARGE_INTESTINE	Colorectal Cancer
ccle_broad_2019	HS746T_STOMACH	HS746T_STOMACH	Esophagogastric Cancer
ccle_broad_2019	LU65_LUNG	LU65_LUNG	Non-Small Cell Lung Cancer
ccle_broad_2019	HS739T_FIBROBLAST	HS739T_FIBROBLAST	Breast Cancer
ccle_broad_2019	SNUC2A_LARGE_INTESTINE	SNUC2A_LARGE_INTESTINE	Colorectal Cancer
ccle_broad_2019	HEC151_ENDOMETRIUM	HEC151_ENDOMETRIUM	Endometrial Cancer
ccle_broad_2019	MSTO211H_PLEURA	MSTO211H_PLEURA	Mesothelioma
ccle_broad_2019	RAJI_HAEMATOPOIETIC_AND_LYMPHOID_TISSUE	RAJI_HAEMATOPOIETIC_AND_LYMPHOID_TISSUE	Mature B-Cell Neoplasms
ccle_broad_2019	SKMEL1_SKIN	SKMEL1_SKIN	Melanoma
ccle_broad_2019	SUPT1_HAEMATOPOIETIC_AND_LYMPHOID_TISSUE	SUPT1_HAEMATOPOIETIC_AND_LYMPHOID_TISSUE	T-Lymphoblastic Leukemia/Lymphoma
ccle_broad_2019	JHH7_LIVER	JHH7_LIVER	Hepatobiliary Cancer
ccle_broad_2019	HUT102_HAEMATOPOIETIC_AND_LYMPHOID_TISSUE	HUT102_HAEMATOPOIETIC_AND_LYMPHOID_TISSUE	T-Lymphoblastic Leukemia/Lymphoma
ccle_broad_2019	5637_URINARY_TRACT	5637_URINARY_TRACT	Bladder Cancer
ccle_broad_2019	HCC38_BREAST	HCC38_BREAST	Breast Cancer
ccle_broad_2019	DU4475_BREAST	DU4475_BREAST	Breast Cancer
ccle_broad_2019	NCIH1573_LUNG	NCIH1573_LUNG	Non-Small Cell Lung Cancer
ccle_broad_2019	NCIH508_LARGE_INTESTINE	NCIH508_LARGE_INTESTINE	Colorectal Cancer
ccle_broad_2019	NCIH1651_LUNG	NCIH1651_LUNG	Non-Small Cell Lung Cancer
ccle_broad_2019	SKUT1_SOFT_TISSUE	SKUT1_SOFT_TISSUE	Soft Tissue Sarcoma
ccle_broad_2019	MDAMB175VII_BREAST	MDAMB175VII_BREAST	Breast Cancer
ccle_broad_2019	SUPB15_HAEMATOPOIETIC_AND_LYMPHOID_TISSUE	SUPB15_HAEMATOPOIETIC_AND_LYMPHOID_TISSUE	B-Lymphoblastic Leukemia/Lymphoma
ccle_broad_2019	BECKER_CENTRAL_NERVOUS_SYSTEM	BECKER_CENTRAL_NERVOUS_SYSTEM	Glioma
ccle_broad_2019	NCIH226_LUNG	NCIH226_LUNG	Non-Small Cell Lung Cancer
ccle_broad_2019	NCIH1666_LUNG	NCIH1666_LUNG	Non-Small Cell Lung Cancer
ccle_broad_2019	SW1783_CENTRAL_NERVOUS_SYSTEM	SW1783_CENTRAL_NERVOUS_SYSTEM	Glioma
ccle_broad_2019	ISTMES1_PLEURA	ISTMES1_PLEURA	Mesothelioma
ccle_broad_2019	NCIH1734_LUNG	NCIH1734_LUNG	Non-Small Cell Lung Cancer
ccle_broad_2019	NCIH2342_LUNG	NCIH2342_LUNG	Non-Small Cell Lung Cancer
ccle_broad_2019	EBC1_LUNG	EBC1_LUNG	Non-Small Cell Lung Cancer
ccle_broad_2019	OC316_OVARY	OC316_OVARY	Ovarian Cancer
ccle_broad_2019	HS936T_SKIN	HS936T_SKIN	Melanoma
ccle_broad_2019	T173_FIBROBLAST	T173_FIBROBLAST	Bone Cancer
ccle_broad_2019	NCIH322_LUNG	NCIH322_LUNG	Non-Small Cell Lung Cancer
ccle_broad_2019	HS618T_FIBROBLAST	HS618T_FIBROBLAST	Non-Small Cell Lung Cancer
ccle_broad_2019	HS870T_FIBROBLAST	HS870T_FIBROBLAST	Bone Cancer
ccle_broad_2019	HS706T_BONE	HS706T_BONE	Bone Cancer
ccle_broad_2019	PANC1_PANCREAS	PANC1_PANCREAS	Pancreatic Cancer
ccle_broad_2019	NCIH2291_LUNG	NCIH2291_LUNG	Non-Small Cell Lung Cancer
ccle_broad_2019	T47D_BREAST	T47D_BREAST	Breast Cancer
ccle_broad_2019	HS742T_FIBROBLAST	HS742T_FIBROBLAST	Breast Cancer
ccle_broad_2019	BICR56_UPPER_AERODIGESTIVE_TRACT	BICR56_UPPER_AERODIGESTIVE_TRACT	Esophagogastric Cancer
ccle_broad_2019	BICR16_UPPER_AERODIGESTIVE_TRACT	BICR16_UPPER_AERODIGESTIVE_TRACT	Esophagogastric Cancer
ccle_broad_2019	TE10_OESOPHAGUS	TE10_OESOPHAGUS	Esophagogastric Cancer
ccle_broad_2019	SKMEL28_SKIN	SKMEL28_SKIN	Melanoma
ccle_broad_2019	BICR6_UPPER_AERODIGESTIVE_TRACT	BICR6_UPPER_AERODIGESTIVE_TRACT	Esophagogastric Cancer
ccle_broad_2019	BHY_UPPER_AERODIGESTIVE_TRACT	BHY_UPPER_AERODIGESTIVE_TRACT	Esophagogastric Cancer
ccle_broad_2019	SH4_SKIN	SH4_SKIN	Melanoma
ccle_broad_2019	KPL1_BREAST	KPL1_BREAST	Breast Cancer
ccle_broad_2019	CGTHW1_THYROID	CGTHW1_THYROID	Thyroid Cancer
ccle_broad_2019	TUHR4TKB_KIDNEY	TUHR4TKB_KIDNEY	Kidney Cancer
ccle_broad_2019	LS123_LARGE_INTESTINE	LS123_LARGE_INTESTINE	Colorectal Cancer
ccle_broad_2019	HEL_HAEMATOPOIETIC_AND_LYMPHOID_TISSUE	HEL_HAEMATOPOIETIC_AND_LYMPHOID_TISSUE	Leukemia
ccle_broad_2019	HPAC_PANCREAS	HPAC_PANCREAS	Pancreatic Cancer
ccle_broad_2019	RCC10RGB_KIDNEY	RCC10RGB_KIDNEY	Kidney Cancer
ccle_broad_2019	JHOM1_OVARY	JHOM1_OVARY	Ovarian Cancer
ccle_broad_2019	SU8686_PANCREAS	SU8686_PANCREAS	Pancreatic Cancer
ccle_broad_2019	HCC33_LUNG	HCC33_LUNG	Small Cell Lung Cancer
ccle_broad_2019	TE6_OESOPHAGUS	TE6_OESOPHAGUS	Esophagogastric Cancer
ccle_broad_2019	JHOC5_OVARY	JHOC5_OVARY	Ovarian Cancer
ccle_broad_2019	ACCMESO1_PLEURA	ACCMESO1_PLEURA	Mesothelioma
ccle_broad_2019	BL41_HAEMATOPOIETIC_AND_LYMPHOID_TISSUE	BL41_HAEMATOPOIETIC_AND_LYMPHOID_TISSUE	Mature B-Cell Neoplasms
ccle_broad_2019	SNU1214_UPPER_AERODIGESTIVE_TRACT	SNU1214_UPPER_AERODIGESTIVE_TRACT	Esophagogastric Cancer
ccle_broad_2019	CORL105_LUNG	CORL105_LUNG	Non-Small Cell Lung Cancer
ccle_broad_2019	LMSU_STOMACH	LMSU_STOMACH	Esophagogastric Cancer
ccle_broad_2019	SNU1197_LARGE_INTESTINE	SNU1197_LARGE_INTESTINE	Colorectal Cancer
ccle_broad_2019	COLO668_LUNG	COLO668_LUNG	Small Cell Lung Cancer
ccle_broad_2019	OSRC2_KIDNEY	OSRC2_KIDNEY	Kidney Cancer
ccle_broad_2019	HUH6_LIVER	HUH6_LIVER	Hepatobiliary Cancer
ccle_broad_2019	PANC0203_PANCREAS	PANC0203_PANCREAS	Pancreatic Cancer
ccle_broad_2019	CJM_SKIN	CJM_SKIN	Melanoma
ccle_broad_2019	BICR22_UPPER_AERODIGESTIVE_TRACT	BICR22_UPPER_AERODIGESTIVE_TRACT	Esophagogastric Cancer
ccle_broad_2019	SHSY5Y_AUTONOMIC_GANGLIA	SHSY5Y_AUTONOMIC_GANGLIA	Neuroblastoma
ccle_broad_2019	TM31_CENTRAL_NERVOUS_SYSTEM	TM31_CENTRAL_NERVOUS_SYSTEM	Glioma
ccle_broad_2019	SNU1272_KIDNEY	SNU1272_KIDNEY	Renal Cell Carcinoma
ccle_broad_2019	KPNRTBM1_AUTONOMIC_GANGLIA	KPNRTBM1_AUTONOMIC_GANGLIA	Neuroblastoma
ccle_broad_2019	BICR18_UPPER_AERODIGESTIVE_TRACT	BICR18_UPPER_AERODIGESTIVE_TRACT	Esophagogastric Cancer
ccle_broad_2019	TE4_OESOPHAGUS	TE4_OESOPHAGUS	Esophagogastric Cancer
ccle_broad_2019	PCM6_HAEMATOPOIETIC_AND_LYMPHOID_TISSUE	PCM6_HAEMATOPOIETIC_AND_LYMPHOID_TISSUE	Mature B-Cell Neoplasms
ccle_broad_2019	ECC10_STOMACH	ECC10_STOMACH	Esophagogastric Cancer
ccle_broad_2019	TUHR14TKB_KIDNEY	TUHR14TKB_KIDNEY	Kidney Cancer
ccle_broad_2019	YD15_SALIVARY_GLAND	YD15_SALIVARY_GLAND	Cancer of Unknown Primary
ccle_broad_2019	UBLC1_URINARY_TRACT	UBLC1_URINARY_TRACT	Bladder Cancer
ccle_broad_2019	ECGI10_OESOPHAGUS	ECGI10_OESOPHAGUS	Esophagogastric Cancer
ccle_broad_2019	CW2_LARGE_INTESTINE	CW2_LARGE_INTESTINE	Colorectal Cancer
ccle_broad_2019	SNU761_LIVER	SNU761_LIVER	Hepatobiliary Cancer
ccle_broad_2019	SNU61_LARGE_INTESTINE	SNU61_LARGE_INTESTINE	Colorectal Cancer
ccle_broad_2019	NCIH1915_LUNG	NCIH1915_LUNG	Non-Small Cell Lung Cancer
ccle_broad_2019	SNU324_PANCREAS	SNU324_PANCREAS	Pancreatic Cancer
ccle_broad_2019	YD10B_UPPER_AERODIGESTIVE_TRACT	YD10B_UPPER_AERODIGESTIVE_TRACT	Esophagogastric Cancer
ccle_broad_2019	HCC2279_LUNG	HCC2279_LUNG	Non-Small Cell Lung Cancer
ccle_broad_2019	TUHR10TKB_KIDNEY	TUHR10TKB_KIDNEY	Kidney Cancer
ccle_broad_2019	HEC1B_ENDOMETRIUM	HEC1B_ENDOMETRIUM	Endometrial Cancer
ccle_broad_2019	VMRCLCP_LUNG	VMRCLCP_LUNG	Non-Small Cell Lung Cancer
ccle_broad_2019	TGBC11TKB_STOMACH	TGBC11TKB_STOMACH	Esophagogastric Cancer
ccle_broad_2019	OVK18_OVARY	OVK18_OVARY	Ovarian Cancer
ccle_broad_2019	SNU1077_ENDOMETRIUM	SNU1077_ENDOMETRIUM	Endometrial Cancer
ccle_broad_2019	HCC1588_LUNG	HCC1588_LUNG	Non-Small Cell Lung Cancer
ccle_broad_2019	SNU213_PANCREAS	SNU213_PANCREAS	Pancreatic Cancer
ccle_broad_2019	HT115_LARGE_INTESTINE	HT115_LARGE_INTESTINE	Colorectal Cancer
ccle_broad_2019	TE14_OESOPHAGUS	TE14_OESOPHAGUS	Esophagogastric Cancer
ccle_broad_2019	TE8_OESOPHAGUS	TE8_OESOPHAGUS	Esophagogastric Cancer
ccle_broad_2019	SNU520_STOMACH	SNU520_STOMACH	Esophagogastric Cancer
ccle_broad_2019	JHUEM3_ENDOMETRIUM	JHUEM3_ENDOMETRIUM	Endometrial Cancer
ccle_broad_2019	LI7_LIVER	LI7_LIVER	Hepatobiliary Cancer
ccle_broad_2019	NCIH838_LUNG	NCIH838_LUNG	Non-Small Cell Lung Cancer
ccle_broad_2019	SNU119_OVARY	SNU119_OVARY	Ovarian Cancer
ccle_broad_2019	SNU1033_LARGE_INTESTINE	SNU1033_LARGE_INTESTINE	Colorectal Cancer
ccle_broad_2019	SNUC5_LARGE_INTESTINE	SNUC5_LARGE_INTESTINE	Colorectal Cancer
ccle_broad_2019	GSS_STOMACH	GSS_STOMACH	Esophagogastric Cancer
ccle_broad_2019	TALL1_HAEMATOPOIETIC_AND_LYMPHOID_TISSUE	TALL1_HAEMATOPOIETIC_AND_LYMPHOID_TISSUE	T-Lymphoblastic Leukemia/Lymphoma
ccle_broad_2019	HCC1171_LUNG	HCC1171_LUNG	Non-Small Cell Lung Cancer
ccle_broad_2019	SNUC4_LARGE_INTESTINE	SNUC4_LARGE_INTESTINE	Colorectal Cancer
ccle_broad_2019	U138MG_CENTRAL_NERVOUS_SYSTEM	U138MG_CENTRAL_NERVOUS_SYSTEM	Glioma
ccle_broad_2019	SNU620_STOMACH	SNU620_STOMACH	Esophagogastric Cancer
ccle_broad_2019	ECC12_STOMACH	ECC12_STOMACH	Esophagogastric Cancer
ccle_broad_2019	GSU_STOMACH	GSU_STOMACH	Esophagogastric Cancer
ccle_broad_2019	KMS18_HAEMATOPOIETIC_AND_LYMPHOID_TISSUE	KMS18_HAEMATOPOIETIC_AND_LYMPHOID_TISSUE	Mature B-Cell Neoplasms
ccle_broad_2019	JHOM2B_OVARY	JHOM2B_OVARY	Ovarian Cancer
ccle_broad_2019	MDAMB231_BREAST	MDAMB231_BREAST	Breast Cancer
ccle_broad_2019	OV90_OVARY	OV90_OVARY	Ovarian Cancer
ccle_broad_2019	RS411_HAEMATOPOIETIC_AND_LYMPHOID_TISSUE	RS411_HAEMATOPOIETIC_AND_LYMPHOID_TISSUE	B-Lymphoblastic Leukemia/Lymphoma
ccle_broad_2019	OVTOKO_OVARY	OVTOKO_OVARY	Ovarian Cancer
ccle_broad_2019	OVCAR4_OVARY	OVCAR4_OVARY	Ovarian Cancer
ccle_broad_2019	HLF_LIVER	HLF_LIVER	Hepatobiliary Cancer
ccle_broad_2019	HCT15_LARGE_INTESTINE	HCT15_LARGE_INTESTINE	Colorectal Cancer
ccle_broad_2019	SW1463_LARGE_INTESTINE	SW1463_LARGE_INTESTINE	Colorectal Cancer
ccle_broad_2019	SF295_CENTRAL_NERVOUS_SYSTEM	SF295_CENTRAL_NERVOUS_SYSTEM	Glioma
ccle_broad_2019	WM115_SKIN	WM115_SKIN	Melanoma
ccle_broad_2019	JHH4_LIVER	JHH4_LIVER	Hepatobiliary Cancer
ccle_broad_2019	OE33_OESOPHAGUS	OE33_OESOPHAGUS	Esophagogastric Cancer
ccle_broad_2019	CCK81_LARGE_INTESTINE	CCK81_LARGE_INTESTINE	Colorectal Cancer
ccle_broad_2019	JHH1_LIVER	JHH1_LIVER	Hepatobiliary Cancer
ccle_broad_2019	SJSA1_BONE	SJSA1_BONE	Bone Cancer
ccle_broad_2019	NCIH2228_LUNG	NCIH2228_LUNG	Non-Small Cell Lung Cancer
ccle_broad_2019	RERFLCAI_LUNG	RERFLCAI_LUNG	Non-Small Cell Lung Cancer
ccle_broad_2019	SKMES1_LUNG	SKMES1_LUNG	Non-Small Cell Lung Cancer
ccle_broad_2019	NCIH520_LUNG	NCIH520_LUNG	Non-Small Cell Lung Cancer
ccle_broad_2019	JHH5_LIVER	JHH5_LIVER	Hepatobiliary Cancer
ccle_broad_2019	FU97_STOMACH	FU97_STOMACH	Esophagogastric Cancer
ccle_broad_2019	COLO800_SKIN	COLO800_SKIN	Melanoma
ccle_broad_2019	NCIH1963_LUNG	NCIH1963_LUNG	Small Cell Lung Cancer
ccle_broad_2019	RL952_ENDOMETRIUM	RL952_ENDOMETRIUM	Endometrial Cancer
ccle_broad_2019	J82_URINARY_TRACT	J82_URINARY_TRACT	Bladder Cancer
ccle_broad_2019	HCC15_LUNG	HCC15_LUNG	Non-Small Cell Lung Cancer
ccle_broad_2019	M059K_CENTRAL_NERVOUS_SYSTEM	M059K_CENTRAL_NERVOUS_SYSTEM	Glioma
ccle_broad_2019	CALU6_LUNG	CALU6_LUNG	Non-Small Cell Lung Cancer
ccle_broad_2019	SKLU1_LUNG	SKLU1_LUNG	Non-Small Cell Lung Cancer
ccle_broad_2019	SW900_LUNG	SW900_LUNG	Non-Small Cell Lung Cancer
ccle_broad_2019	UACC62_SKIN	UACC62_SKIN	Melanoma
ccle_broad_2019	MFE280_ENDOMETRIUM	MFE280_ENDOMETRIUM	Endometrial Cancer
ccle_broad_2019	MFE319_ENDOMETRIUM	MFE319_ENDOMETRIUM	Endometrial Cancer
ccle_broad_2019	MFE296_ENDOMETRIUM	MFE296_ENDOMETRIUM	Endometrial Cancer
ccle_broad_2019	GOS3_CENTRAL_NERVOUS_SYSTEM	GOS3_CENTRAL_NERVOUS_SYSTEM	Glioma
ccle_broad_2019	GI1_CENTRAL_NERVOUS_SYSTEM	GI1_CENTRAL_NERVOUS_SYSTEM	Glioma
ccle_broad_2019	PC14_LUNG	PC14_LUNG	Non-Small Cell Lung Cancer
ccle_broad_2019	KYSE410_OESOPHAGUS	KYSE410_OESOPHAGUS	Esophagogastric Cancer
ccle_broad_2019	A204_SOFT_TISSUE	A204_SOFT_TISSUE	Soft Tissue Sarcoma
ccle_broad_2019	PATU8902_PANCREAS	PATU8902_PANCREAS	Pancreatic Cancer
ccle_broad_2019	NCIH810_LUNG	NCIH810_LUNG	Non-Small Cell Lung Cancer
ccle_broad_2019	RERFLCMS_LUNG	RERFLCMS_LUNG	Non-Small Cell Lung Cancer
ccle_broad_2019	L1236_HAEMATOPOIETIC_AND_LYMPHOID_TISSUE	L1236_HAEMATOPOIETIC_AND_LYMPHOID_TISSUE	Hodgkin Lymphoma
ccle_broad_2019	DANG_PANCREAS	DANG_PANCREAS	Pancreatic Cancer
ccle_broad_2019	NCIH460_LUNG	NCIH460_LUNG	Non-Small Cell Lung Cancer
ccle_broad_2019	KYSE140_OESOPHAGUS	KYSE140_OESOPHAGUS	Esophagogastric Cancer
ccle_broad_2019	KYSE180_OESOPHAGUS	KYSE180_OESOPHAGUS	Esophagogastric Cancer
ccle_broad_2019	HUPT3_PANCREAS	HUPT3_PANCREAS	Pancreatic Cancer
ccle_broad_2019	EFE184_ENDOMETRIUM	EFE184_ENDOMETRIUM	Endometrial Cancer
ccle_broad_2019	GCIY_STOMACH	GCIY_STOMACH	Esophagogastric Cancer
ccle_broad_2019	SH10TC_STOMACH	SH10TC_STOMACH	Esophagogastric Cancer
ccle_broad_2019	CAOV4_OVARY	CAOV4_OVARY	Ovarian Cancer
ccle_broad_2019	HCC2218_BREAST	HCC2218_BREAST	Breast Cancer
ccle_broad_2019	KMS21BM_HAEMATOPOIETIC_AND_LYMPHOID_TISSUE	KMS21BM_HAEMATOPOIETIC_AND_LYMPHOID_TISSUE	Mature B-Cell Neoplasms
ccle_broad_2019	KMS26_HAEMATOPOIETIC_AND_LYMPHOID_TISSUE	KMS26_HAEMATOPOIETIC_AND_LYMPHOID_TISSUE	Mature B-Cell Neoplasms
ccle_broad_2019	KMS27_HAEMATOPOIETIC_AND_LYMPHOID_TISSUE	KMS27_HAEMATOPOIETIC_AND_LYMPHOID_TISSUE	Mature B-Cell Neoplasms
ccle_broad_2019	KO52_HAEMATOPOIETIC_AND_LYMPHOID_TISSUE	KO52_HAEMATOPOIETIC_AND_LYMPHOID_TISSUE	Leukemia
ccle_broad_2019	KMS28BM_HAEMATOPOIETIC_AND_LYMPHOID_TISSUE	KMS28BM_HAEMATOPOIETIC_AND_LYMPHOID_TISSUE	Mature B-Cell Neoplasms
ccle_broad_2019	KNS60_CENTRAL_NERVOUS_SYSTEM	KNS60_CENTRAL_NERVOUS_SYSTEM	Glioma
ccle_broad_2019	KNS81_CENTRAL_NERVOUS_SYSTEM	KNS81_CENTRAL_NERVOUS_SYSTEM	Glioma
ccle_broad_2019	KPNSI9S_AUTONOMIC_GANGLIA	KPNSI9S_AUTONOMIC_GANGLIA	Neuroblastoma
ccle_broad_2019	LU99_LUNG	LU99_LUNG	Non-Small Cell Lung Cancer
ccle_broad_2019	KMS34_HAEMATOPOIETIC_AND_LYMPHOID_TISSUE	KMS34_HAEMATOPOIETIC_AND_LYMPHOID_TISSUE	Mature B-Cell Neoplasms
ccle_broad_2019	MKN1_STOMACH	MKN1_STOMACH	Esophagogastric Cancer
ccle_broad_2019	MKN74_STOMACH	MKN74_STOMACH	Esophagogastric Cancer
ccle_broad_2019	KP3_PANCREAS	KP3_PANCREAS	Pancreatic Cancer
ccle_broad_2019	NCO2_HAEMATOPOIETIC_AND_LYMPHOID_TISSUE	NCO2_HAEMATOPOIETIC_AND_LYMPHOID_TISSUE	Blood Cancer
ccle_broad_2019	KHM1B_HAEMATOPOIETIC_AND_LYMPHOID_TISSUE	KHM1B_HAEMATOPOIETIC_AND_LYMPHOID_TISSUE	Mature B-Cell Neoplasms
ccle_broad_2019	HSC2_UPPER_AERODIGESTIVE_TRACT	HSC2_UPPER_AERODIGESTIVE_TRACT	Esophagogastric Cancer
ccle_broad_2019	KG1C_CENTRAL_NERVOUS_SYSTEM	KG1C_CENTRAL_NERVOUS_SYSTEM	Glioma
ccle_broad_2019	HUH7_LIVER	HUH7_LIVER	Hepatobiliary Cancer
ccle_broad_2019	KMBC2_URINARY_TRACT	KMBC2_URINARY_TRACT	Bladder Cancer
ccle_broad_2019	KMRC20_KIDNEY	KMRC20_KIDNEY	Kidney Cancer
ccle_broad_2019	HUCCT1_BILIARY_TRACT	HUCCT1_BILIARY_TRACT	Hepatobiliary Cancer
ccle_broad_2019	KIJK_HAEMATOPOIETIC_AND_LYMPHOID_TISSUE	KIJK_HAEMATOPOIETIC_AND_LYMPHOID_TISSUE	T-Lymphoblastic Leukemia/Lymphoma
ccle_broad_2019	A4FUK_HAEMATOPOIETIC_AND_LYMPHOID_TISSUE	A4FUK_HAEMATOPOIETIC_AND_LYMPHOID_TISSUE	Mature B-Cell Neoplasms
ccle_broad_2019	KALS1_CENTRAL_NERVOUS_SYSTEM	KALS1_CENTRAL_NERVOUS_SYSTEM	Glioma
ccle_broad_2019	HEC108_ENDOMETRIUM	HEC108_ENDOMETRIUM	Endometrial Cancer
ccle_broad_2019	HEL9217_HAEMATOPOIETIC_AND_LYMPHOID_TISSUE	HEL9217_HAEMATOPOIETIC_AND_LYMPHOID_TISSUE	Leukemia
ccle_broad_2019	HUH28_BILIARY_TRACT	HUH28_BILIARY_TRACT	Hepatobiliary Cancer
ccle_broad_2019	CMK115_HAEMATOPOIETIC_AND_LYMPHOID_TISSUE	CMK115_HAEMATOPOIETIC_AND_LYMPHOID_TISSUE	Leukemia
ccle_broad_2019	HEC265_ENDOMETRIUM	HEC265_ENDOMETRIUM	Endometrial Cancer
ccle_broad_2019	CAL12T_LUNG	CAL12T_LUNG	Non-Small Cell Lung Cancer
ccle_broad_2019	THP1_HAEMATOPOIETIC_AND_LYMPHOID_TISSUE	THP1_HAEMATOPOIETIC_AND_LYMPHOID_TISSUE	Leukemia
ccle_broad_2019	A3KAW_HAEMATOPOIETIC_AND_LYMPHOID_TISSUE	A3KAW_HAEMATOPOIETIC_AND_LYMPHOID_TISSUE	Mature B-Cell Neoplasms
ccle_broad_2019	SKNSH_AUTONOMIC_GANGLIA	SKNSH_AUTONOMIC_GANGLIA	Neuroblastoma
ccle_broad_2019	HCC1954_BREAST	HCC1954_BREAST	Breast Cancer
ccle_broad_2019	CAMA1_BREAST	CAMA1_BREAST	Breast Cancer
ccle_broad_2019	HEC6_ENDOMETRIUM	HEC6_ENDOMETRIUM	Endometrial Cancer
ccle_broad_2019	AM38_CENTRAL_NERVOUS_SYSTEM	AM38_CENTRAL_NERVOUS_SYSTEM	Glioma
ccle_broad_2019	HEC50B_ENDOMETRIUM	HEC50B_ENDOMETRIUM	Endometrial Cancer
ccle_broad_2019	HSC3_UPPER_AERODIGESTIVE_TRACT	HSC3_UPPER_AERODIGESTIVE_TRACT	Esophagogastric Cancer
ccle_broad_2019	HSC4_UPPER_AERODIGESTIVE_TRACT	HSC4_UPPER_AERODIGESTIVE_TRACT	Esophagogastric Cancer
ccle_broad_2019	KMS11_HAEMATOPOIETIC_AND_LYMPHOID_TISSUE	KMS11_HAEMATOPOIETIC_AND_LYMPHOID_TISSUE	Mature B-Cell Neoplasms
ccle_broad_2019	KP4_PANCREAS	KP4_PANCREAS	Pancreatic Cancer
ccle_broad_2019	KE39_STOMACH	KE39_STOMACH	Esophagogastric Cancer
ccle_broad_2019	COV504_OVARY	COV504_OVARY	Ovarian Cancer
ccle_broad_2019	KE97_HAEMATOPOIETIC_AND_LYMPHOID_TISSUE	KE97_HAEMATOPOIETIC_AND_LYMPHOID_TISSUE	Mature B-Cell Neoplasms
ccle_broad_2019	VMRCRCW_KIDNEY	VMRCRCW_KIDNEY	Kidney Cancer
ccle_broad_2019	HGC27_STOMACH	HGC27_STOMACH	Esophagogastric Cancer
ccle_broad_2019	LUDLU1_LUNG	LUDLU1_LUNG	Non-Small Cell Lung Cancer
ccle_broad_2019	HUG1N_STOMACH	HUG1N_STOMACH	Esophagogastric Cancer
ccle_broad_2019	U266B1_HAEMATOPOIETIC_AND_LYMPHOID_TISSUE	U266B1_HAEMATOPOIETIC_AND_LYMPHOID_TISSUE	Mature B-Cell Neoplasms
ccle_broad_2019	NUGC4_STOMACH	NUGC4_STOMACH	Esophagogastric Cancer
ccle_broad_2019	HMC18_BREAST	HMC18_BREAST	Breast Cancer
ccle_broad_2019	CAS1_CENTRAL_NERVOUS_SYSTEM	CAS1_CENTRAL_NERVOUS_SYSTEM	Glioma
ccle_broad_2019	KMM1_HAEMATOPOIETIC_AND_LYMPHOID_TISSUE	KMM1_HAEMATOPOIETIC_AND_LYMPHOID_TISSUE	Mature B-Cell Neoplasms
ccle_broad_2019	CORL23_LUNG	CORL23_LUNG	Non-Small Cell Lung Cancer
ccle_broad_2019	MORCPR_LUNG	MORCPR_LUNG	Non-Small Cell Lung Cancer
ccle_broad_2019	HARA_LUNG	HARA_LUNG	Non-Small Cell Lung Cancer
ccle_broad_2019	SKOV3_OVARY	SKOV3_OVARY	Ovarian Cancer
ccle_broad_2019	HPAFII_PANCREAS	HPAFII_PANCREAS	Pancreatic Cancer
ccle_broad_2019	MC116_HAEMATOPOIETIC_AND_LYMPHOID_TISSUE	MC116_HAEMATOPOIETIC_AND_LYMPHOID_TISSUE	B-Lymphoblastic Leukemia/Lymphoma
ccle_broad_2019	NCIH1568_LUNG	NCIH1568_LUNG	Non-Small Cell Lung Cancer
ccle_broad_2019	CA46_HAEMATOPOIETIC_AND_LYMPHOID_TISSUE	CA46_HAEMATOPOIETIC_AND_LYMPHOID_TISSUE	Mature B-Cell Neoplasms
ccle_broad_2019	A498_KIDNEY	A498_KIDNEY	Kidney Cancer
ccle_broad_2019	BCP1_HAEMATOPOIETIC_AND_LYMPHOID_TISSUE	BCP1_HAEMATOPOIETIC_AND_LYMPHOID_TISSUE	B-Lymphoblastic Leukemia/Lymphoma
ccle_broad_2019	A673_BONE	A673_BONE	Bone Cancer
ccle_broad_2019	AU565_BREAST	AU565_BREAST	Breast Cancer
ccle_broad_2019	COLO201_LARGE_INTESTINE	COLO201_LARGE_INTESTINE	Colorectal Cancer
ccle_broad_2019	CAPAN1_PANCREAS	CAPAN1_PANCREAS	Pancreatic Cancer
ccle_broad_2019	NCIH1563_LUNG	NCIH1563_LUNG	Non-Small Cell Lung Cancer
ccle_broad_2019	NCIH358_LUNG	NCIH358_LUNG	Non-Small Cell Lung Cancer
ccle_broad_2019	CFPAC1_PANCREAS	CFPAC1_PANCREAS	Pancreatic Cancer
ccle_broad_2019	NIHOVCAR3_OVARY	NIHOVCAR3_OVARY	Ovarian Cancer
ccle_broad_2019	NCIH1650_LUNG	NCIH1650_LUNG	Non-Small Cell Lung Cancer
ccle_broad_2019	NCIH1793_LUNG	NCIH1793_LUNG	Non-Small Cell Lung Cancer
ccle_broad_2019	NCIH1437_LUNG	NCIH1437_LUNG	Non-Small Cell Lung Cancer
ccle_broad_2019	KNS62_LUNG	KNS62_LUNG	Non-Small Cell Lung Cancer
ccle_broad_2019	HS578T_BREAST	HS578T_BREAST	Breast Cancer
ccle_broad_2019	BT20_BREAST	BT20_BREAST	Breast Cancer
ccle_broad_2019	SNU182_LIVER	SNU182_LIVER	Hepatobiliary Cancer
ccle_broad_2019	SKNMC_BONE	SKNMC_BONE	Bone Cancer
ccle_broad_2019	HH_HAEMATOPOIETIC_AND_LYMPHOID_TISSUE	HH_HAEMATOPOIETIC_AND_LYMPHOID_TISSUE	T-Lymphoblastic Leukemia/Lymphoma
ccle_broad_2019	FADU_UPPER_AERODIGESTIVE_TRACT	FADU_UPPER_AERODIGESTIVE_TRACT	Esophagogastric Cancer
ccle_broad_2019	SJRH30_SOFT_TISSUE	SJRH30_SOFT_TISSUE	Soft Tissue Sarcoma
ccle_broad_2019	MDAMB361_BREAST	MDAMB361_BREAST	Breast Cancer
ccle_broad_2019	MDAMB436_BREAST	MDAMB436_BREAST	Breast Cancer
ccle_broad_2019	PANC0213_PANCREAS	PANC0213_PANCREAS	Pancreatic Cancer
ccle_broad_2019	DB_HAEMATOPOIETIC_AND_LYMPHOID_TISSUE	DB_HAEMATOPOIETIC_AND_LYMPHOID_TISSUE	Mature B-Cell Neoplasms
ccle_broad_2019	RDES_BONE	RDES_BONE	Bone Cancer
ccle_broad_2019	CAL27_UPPER_AERODIGESTIVE_TRACT	CAL27_UPPER_AERODIGESTIVE_TRACT	Esophagogastric Cancer
ccle_broad_2019	MESSA_SOFT_TISSUE	MESSA_SOFT_TISSUE	Soft Tissue Sarcoma
ccle_broad_2019	SW1271_LUNG	SW1271_LUNG	Small Cell Lung Cancer
ccle_broad_2019	NCIH1792_LUNG	NCIH1792_LUNG	Non-Small Cell Lung Cancer
ccle_broad_2019	GCT_SOFT_TISSUE	GCT_SOFT_TISSUE	Soft Tissue Sarcoma
ccle_broad_2019	SKBR3_BREAST	SKBR3_BREAST	Breast Cancer
ccle_broad_2019	SNU16_STOMACH	SNU16_STOMACH	Esophagogastric Cancer
ccle_broad_2019	NCIH82_LUNG	NCIH82_LUNG	Small Cell Lung Cancer
ccle_broad_2019	NCIN87_STOMACH	NCIN87_STOMACH	Esophagogastric Cancer
ccle_broad_2019	U2OS_BONE	U2OS_BONE	Bone Cancer
ccle_broad_2019	H4_CENTRAL_NERVOUS_SYSTEM	H4_CENTRAL_NERVOUS_SYSTEM	Glioma
ccle_broad_2019	GDM1_HAEMATOPOIETIC_AND_LYMPHOID_TISSUE	GDM1_HAEMATOPOIETIC_AND_LYMPHOID_TISSUE	Leukemia
ccle_broad_2019	HCC1143_BREAST	HCC1143_BREAST	Breast Cancer
ccle_broad_2019	T24_URINARY_TRACT	T24_URINARY_TRACT	Bladder Cancer
ccle_broad_2019	G401_SOFT_TISSUE	G401_SOFT_TISSUE	Soft Tissue Sarcoma
ccle_broad_2019	HCC1937_BREAST	HCC1937_BREAST	Breast Cancer
ccle_broad_2019	HCC1569_BREAST	HCC1569_BREAST	Breast Cancer
ccle_broad_2019	OCUM1_STOMACH	OCUM1_STOMACH	Esophagogastric Cancer
ccle_broad_2019	SAOS2_BONE	SAOS2_BONE	Bone Cancer
ccle_broad_2019	D283MED_CENTRAL_NERVOUS_SYSTEM	D283MED_CENTRAL_NERVOUS_SYSTEM	Embryonal Tumor
ccle_broad_2019	SCC9_UPPER_AERODIGESTIVE_TRACT	SCC9_UPPER_AERODIGESTIVE_TRACT	Esophagogastric Cancer
ccle_broad_2019	HCC1395_BREAST	HCC1395_BREAST	Breast Cancer
ccle_broad_2019	NMCG1_CENTRAL_NERVOUS_SYSTEM	NMCG1_CENTRAL_NERVOUS_SYSTEM	Glioma
ccle_broad_2019	TEN_ENDOMETRIUM	TEN_ENDOMETRIUM	Endometrial Cancer
ccle_broad_2019	TE9_OESOPHAGUS	TE9_OESOPHAGUS	Esophagogastric Cancer
ccle_broad_2019	KNS42_CENTRAL_NERVOUS_SYSTEM	KNS42_CENTRAL_NERVOUS_SYSTEM	Glioma
ccle_broad_2019	KYSE520_OESOPHAGUS	KYSE520_OESOPHAGUS	Esophagogastric Cancer
ccle_broad_2019	KYSE270_OESOPHAGUS	KYSE270_OESOPHAGUS	Esophagogastric Cancer
ccle_broad_2019	JHUEM1_ENDOMETRIUM	JHUEM1_ENDOMETRIUM	Endometrial Cancer
ccle_broad_2019	YH13_CENTRAL_NERVOUS_SYSTEM	YH13_CENTRAL_NERVOUS_SYSTEM	Glioma
ccle_broad_2019	IALM_LUNG	IALM_LUNG	Non-Small Cell Lung Cancer
ccle_broad_2019	NCIH2052_PLEURA	NCIH2052_PLEURA	Mesothelioma
ccle_broad_2019	EB2_HAEMATOPOIETIC_AND_LYMPHOID_TISSUE	EB2_HAEMATOPOIETIC_AND_LYMPHOID_TISSUE	Mature B-Cell Neoplasms
ccle_broad_2019	SKNFI_AUTONOMIC_GANGLIA	SKNFI_AUTONOMIC_GANGLIA	Neuroblastoma
ccle_broad_2019	SKNAS_AUTONOMIC_GANGLIA	SKNAS_AUTONOMIC_GANGLIA	Neuroblastoma
ccle_broad_2019	GA10_HAEMATOPOIETIC_AND_LYMPHOID_TISSUE	GA10_HAEMATOPOIETIC_AND_LYMPHOID_TISSUE	Mature B-Cell Neoplasms
ccle_broad_2019	SNU398_LIVER	SNU398_LIVER	Hepatobiliary Cancer
ccle_broad_2019	SNU423_LIVER	SNU423_LIVER	Hepatobiliary Cancer
ccle_broad_2019	SCC4_UPPER_AERODIGESTIVE_TRACT	SCC4_UPPER_AERODIGESTIVE_TRACT	Esophagogastric Cancer
ccle_broad_2019	EB1_HAEMATOPOIETIC_AND_LYMPHOID_TISSUE	EB1_HAEMATOPOIETIC_AND_LYMPHOID_TISSUE	Mature B-Cell Neoplasms
ccle_broad_2019	HCC1187_BREAST	HCC1187_BREAST	Breast Cancer
ccle_broad_2019	SNU387_LIVER	SNU387_LIVER	Hepatobiliary Cancer
ccle_broad_2019	DAUDI_HAEMATOPOIETIC_AND_LYMPHOID_TISSUE	DAUDI_HAEMATOPOIETIC_AND_LYMPHOID_TISSUE	Mature B-Cell Neoplasms
ccle_broad_2019	HT_HAEMATOPOIETIC_AND_LYMPHOID_TISSUE	HT_HAEMATOPOIETIC_AND_LYMPHOID_TISSUE	B-Lymphoblastic Leukemia/Lymphoma
ccle_broad_2019	MJ_HAEMATOPOIETIC_AND_LYMPHOID_TISSUE	MJ_HAEMATOPOIETIC_AND_LYMPHOID_TISSUE	T-Lymphoblastic Leukemia/Lymphoma
ccle_broad_2019	JM1_HAEMATOPOIETIC_AND_LYMPHOID_TISSUE	JM1_HAEMATOPOIETIC_AND_LYMPHOID_TISSUE	B-Lymphoblastic Leukemia/Lymphoma
ccle_broad_2019	C2BBE1_LARGE_INTESTINE	C2BBE1_LARGE_INTESTINE	Colorectal Cancer
ccle_broad_2019	SKES1_BONE	SKES1_BONE	Bone Cancer
ccle_broad_2019	EPLC272H_LUNG	EPLC272H_LUNG	Non-Small Cell Lung Cancer
ccle_broad_2019	BXPC3_PANCREAS	BXPC3_PANCREAS	Pancreatic Cancer
ccle_broad_2019	NCIH1355_LUNG	NCIH1355_LUNG	Non-Small Cell Lung Cancer
ccle_broad_2019	SNU5_STOMACH	SNU5_STOMACH	Esophagogastric Cancer
ccle_broad_2019	SNU475_LIVER	SNU475_LIVER	Hepatobiliary Cancer
ccle_broad_2019	HEC251_ENDOMETRIUM	HEC251_ENDOMETRIUM	Endometrial Cancer
ccle_broad_2019	HCC95_LUNG	HCC95_LUNG	Non-Small Cell Lung Cancer
ccle_broad_2019	253J_URINARY_TRACT	253J_URINARY_TRACT	Bladder Cancer
ccle_broad_2019	HCC1438_LUNG	HCC1438_LUNG	Non-Small Cell Lung Cancer
ccle_broad_2019	253JBV_URINARY_TRACT	253JBV_URINARY_TRACT	Bladder Cancer
ccle_broad_2019	RPMI7951_SKIN	RPMI7951_SKIN	Melanoma
ccle_broad_2019	SNU1066_UPPER_AERODIGESTIVE_TRACT	SNU1066_UPPER_AERODIGESTIVE_TRACT	Esophagogastric Cancer
ccle_broad_2019	SNU1041_UPPER_AERODIGESTIVE_TRACT	SNU1041_UPPER_AERODIGESTIVE_TRACT	Esophagogastric Cancer
ccle_broad_2019	HCC2108_LUNG	HCC2108_LUNG	Non-Small Cell Lung Cancer
ccle_broad_2019	COLO783_SKIN	COLO783_SKIN	Melanoma
ccle_broad_2019	HCC1359_LUNG	HCC1359_LUNG	Non-Small Cell Lung Cancer
ccle_broad_2019	BICR31_UPPER_AERODIGESTIVE_TRACT	BICR31_UPPER_AERODIGESTIVE_TRACT	Esophagogastric Cancer
ccle_broad_2019	COV362_OVARY	COV362_OVARY	Ovarian Cancer
ccle_broad_2019	COLO792_SKIN	COLO792_SKIN	Melanoma
ccle_broad_2019	COV434_OVARY	COV434_OVARY	Ovarian Cancer
ccle_broad_2019	WM983B_SKIN	WM983B_SKIN	Melanoma
ccle_broad_2019	LS513_LARGE_INTESTINE	LS513_LARGE_INTESTINE	Colorectal Cancer
ccle_broad_2019	NCIH2110_LUNG	NCIH2110_LUNG	Non-Small Cell Lung Cancer
ccle_broad_2019	CHAGOK1_LUNG	CHAGOK1_LUNG	Non-Small Cell Lung Cancer
ccle_broad_2019	DMS454_LUNG	DMS454_LUNG	Small Cell Lung Cancer
ccle_broad_2019	CORL47_LUNG	CORL47_LUNG	Small Cell Lung Cancer
ccle_broad_2019	FTC238_THYROID	FTC238_THYROID	Thyroid Cancer
ccle_broad_2019	DMS273_LUNG	DMS273_LUNG	Small Cell Lung Cancer
ccle_broad_2019	FTC133_THYROID	FTC133_THYROID	Thyroid Cancer
ccle_broad_2019	CORL311_LUNG	CORL311_LUNG	Small Cell Lung Cancer
ccle_broad_2019	NCIH2286_LUNG	NCIH2286_LUNG	Small Cell Lung Cancer
ccle_broad_2019	NCIH1339_LUNG	NCIH1339_LUNG	Small Cell Lung Cancer
ccle_broad_2019	WM793_SKIN	WM793_SKIN	Melanoma
ccle_broad_2019	A704_KIDNEY	A704_KIDNEY	Kidney Cancer
ccle_broad_2019	MDAMB435S_SKIN	MDAMB435S_SKIN	Melanoma
ccle_broad_2019	WM1799_SKIN	WM1799_SKIN	Melanoma
ccle_broad_2019	MEWO_SKIN	MEWO_SKIN	Melanoma
ccle_broad_2019	WM88_SKIN	WM88_SKIN	Melanoma
ccle_broad_2019	NCIH2081_LUNG	NCIH2081_LUNG	Small Cell Lung Cancer
ccle_broad_2019	HS255T_FIBROBLAST	HS255T_FIBROBLAST	Colorectal Cancer
ccle_broad_2019	NCIH1092_LUNG	NCIH1092_LUNG	Small Cell Lung Cancer
ccle_broad_2019	SW837_LARGE_INTESTINE	SW837_LARGE_INTESTINE	Colorectal Cancer
ccle_broad_2019	JHH6_LIVER	JHH6_LIVER	Hepatobiliary Cancer
ccle_broad_2019	IGR1_SKIN	IGR1_SKIN	Melanoma
ccle_broad_2019	NCIH1105_LUNG	NCIH1105_LUNG	Small Cell Lung Cancer
ccle_broad_2019	NCIH1436_LUNG	NCIH1436_LUNG	Small Cell Lung Cancer
ccle_broad_2019	NCIH1876_LUNG	NCIH1876_LUNG	Small Cell Lung Cancer
ccle_broad_2019	CORL24_LUNG	CORL24_LUNG	Small Cell Lung Cancer
ccle_broad_2019	COV644_OVARY	COV644_OVARY	Ovarian Cancer
ccle_broad_2019	GP2D_LARGE_INTESTINE	GP2D_LARGE_INTESTINE	Colorectal Cancer
ccle_broad_2019	PECAPJ15_UPPER_AERODIGESTIVE_TRACT	PECAPJ15_UPPER_AERODIGESTIVE_TRACT	Esophagogastric Cancer
ccle_broad_2019	CORL88_LUNG	CORL88_LUNG	Small Cell Lung Cancer
ccle_broad_2019	CORL95_LUNG	CORL95_LUNG	Small Cell Lung Cancer
ccle_broad_2019	PECAPJ49_UPPER_AERODIGESTIVE_TRACT	PECAPJ49_UPPER_AERODIGESTIVE_TRACT	Esophagogastric Cancer
ccle_broad_2019	PECAPJ34CLONEC12_UPPER_AERODIGESTIVE_TRACT	PECAPJ34CLONEC12_UPPER_AERODIGESTIVE_TRACT	Esophagogastric Cancer
ccle_broad_2019	CORL51_LUNG	CORL51_LUNG	Small Cell Lung Cancer
ccle_broad_2019	RT11284_URINARY_TRACT	RT11284_URINARY_TRACT	Bladder Cancer
ccle_broad_2019	PECAPJ41CLONED2_UPPER_AERODIGESTIVE_TRACT	PECAPJ41CLONED2_UPPER_AERODIGESTIVE_TRACT	Esophagogastric Cancer
ccle_broad_2019	OV7_OVARY	OV7_OVARY	Ovarian Cancer
ccle_broad_2019	HT55_LARGE_INTESTINE	HT55_LARGE_INTESTINE	Colorectal Cancer
ccle_broad_2019	OAW42_OVARY	OAW42_OVARY	Ovarian Cancer
ccle_broad_2019	MDST8_LARGE_INTESTINE	MDST8_LARGE_INTESTINE	Colorectal Cancer
ccle_broad_2019	OAW28_OVARY	OAW28_OVARY	Ovarian Cancer
ccle_broad_2019	SUIT2_PANCREAS	SUIT2_PANCREAS	Pancreatic Cancer
ccle_broad_2019	LC1SQSF_LUNG	LC1SQSF_LUNG	Non-Small Cell Lung Cancer
ccle_broad_2019	KASUMI1_HAEMATOPOIETIC_AND_LYMPHOID_TISSUE	KASUMI1_HAEMATOPOIETIC_AND_LYMPHOID_TISSUE	Leukemia
ccle_broad_2019	SUPM2_HAEMATOPOIETIC_AND_LYMPHOID_TISSUE	SUPM2_HAEMATOPOIETIC_AND_LYMPHOID_TISSUE	T-Lymphoblastic Leukemia/Lymphoma
ccle_broad_2019	SKHEP1_LIVER	SKHEP1_LIVER	Hepatobiliary Cancer
ccle_broad_2019	OVCAR8_OVARY	OVCAR8_OVARY	Ovarian Cancer
ccle_broad_2019	NCIH2172_LUNG	NCIH2172_LUNG	Non-Small Cell Lung Cancer
ccle_broad_2019	ISHIKAWAHERAKLIO02ER_ENDOMETRIUM	ISHIKAWAHERAKLIO02ER_ENDOMETRIUM	Endometrial Cancer
ccle_broad_2019	NCIH596_LUNG	NCIH596_LUNG	Non-Small Cell Lung Cancer
ccle_broad_2019	NCIH650_LUNG	NCIH650_LUNG	Non-Small Cell Lung Cancer
ccle_broad_2019	SW1573_LUNG	SW1573_LUNG	Non-Small Cell Lung Cancer
ccle_broad_2019	OVMANA_OVARY	OVMANA_OVARY	Ovarian Cancer
ccle_broad_2019	SKCO1_LARGE_INTESTINE	SKCO1_LARGE_INTESTINE	Colorectal Cancer
ccle_broad_2019	KARPAS299_HAEMATOPOIETIC_AND_LYMPHOID_TISSUE	KARPAS299_HAEMATOPOIETIC_AND_LYMPHOID_TISSUE	T-Lymphoblastic Leukemia/Lymphoma
ccle_broad_2019	YAPC_PANCREAS	YAPC_PANCREAS	Pancreatic Cancer
ccle_broad_2019	HT1197_URINARY_TRACT	HT1197_URINARY_TRACT	Bladder Cancer
ccle_broad_2019	A253_SALIVARY_GLAND	A253_SALIVARY_GLAND	Cancer of Unknown Primary
ccle_broad_2019	HCC366_LUNG	HCC366_LUNG	Non-Small Cell Lung Cancer
ccle_broad_2019	DKMG_CENTRAL_NERVOUS_SYSTEM	DKMG_CENTRAL_NERVOUS_SYSTEM	Glioma
ccle_broad_2019	SNU349_KIDNEY	SNU349_KIDNEY	Renal Cell Carcinoma
ccle_broad_2019	UMUC1_URINARY_TRACT	UMUC1_URINARY_TRACT	Bladder Cancer
ccle_broad_2019	NAMALWA_HAEMATOPOIETIC_AND_LYMPHOID_TISSUE	NAMALWA_HAEMATOPOIETIC_AND_LYMPHOID_TISSUE	Mature B-Cell Neoplasms
ccle_broad_2019	NCIH292_LUNG	NCIH292_LUNG	Non-Small Cell Lung Cancer
ccle_broad_2019	59M_OVARY	59M_OVARY	Ovarian Cancer
ccle_broad_2019	U118MG_CENTRAL_NERVOUS_SYSTEM	U118MG_CENTRAL_NERVOUS_SYSTEM	Glioma
ccle_broad_2019	VMRCLCD_LUNG	VMRCLCD_LUNG	Non-Small Cell Lung Cancer
ccle_broad_2019	HCC1833_LUNG	HCC1833_LUNG	Non-Small Cell Lung Cancer
ccle_broad_2019	RH30_SOFT_TISSUE	RH30_SOFT_TISSUE	Soft Tissue Sarcoma
ccle_broad_2019	TCCSUP_URINARY_TRACT	TCCSUP_URINARY_TRACT	Bladder Cancer
ccle_broad_2019	SNU601_STOMACH	SNU601_STOMACH	Esophagogastric Cancer
ccle_broad_2019	CAL33_UPPER_AERODIGESTIVE_TRACT	CAL33_UPPER_AERODIGESTIVE_TRACT	Esophagogastric Cancer
ccle_broad_2019	SNU668_STOMACH	SNU668_STOMACH	Esophagogastric Cancer
ccle_broad_2019	CORL279_LUNG	CORL279_LUNG	Small Cell Lung Cancer
ccle_broad_2019	GB1_CENTRAL_NERVOUS_SYSTEM	GB1_CENTRAL_NERVOUS_SYSTEM	Glioma
ccle_broad_2019	KURAMOCHI_OVARY	KURAMOCHI_OVARY	Ovarian Cancer
ccle_broad_2019	COLO775_HAEMATOPOIETIC_AND_LYMPHOID_TISSUE	COLO775_HAEMATOPOIETIC_AND_LYMPHOID_TISSUE	Blood Cancer
ccle_broad_2019	COLO684_ENDOMETRIUM	COLO684_ENDOMETRIUM	Endometrial Cancer
ccle_broad_2019	GRM_SKIN	GRM_SKIN	Melanoma
ccle_broad_2019	SNU685_ENDOMETRIUM	SNU685_ENDOMETRIUM	Endometrial Cancer
ccle_broad_2019	SNU886_LIVER	SNU886_LIVER	Hepatobiliary Cancer
ccle_broad_2019	NCCSTCK140_STOMACH	NCCSTCK140_STOMACH	Esophagogastric Cancer
ccle_broad_2019	NCIH3255_LUNG	NCIH3255_LUNG	Non-Small Cell Lung Cancer
ccle_broad_2019	SNU719_STOMACH	SNU719_STOMACH	Esophagogastric Cancer
ccle_broad_2019	SNU489_CENTRAL_NERVOUS_SYSTEM	SNU489_CENTRAL_NERVOUS_SYSTEM	Glioma
ccle_broad_2019	SNU81_LARGE_INTESTINE	SNU81_LARGE_INTESTINE	Colorectal Cancer
ccle_broad_2019	A2058_SKIN	A2058_SKIN	Melanoma
ccle_broad_2019	HTK_HAEMATOPOIETIC_AND_LYMPHOID_TISSUE	HTK_HAEMATOPOIETIC_AND_LYMPHOID_TISSUE	Mature B-Cell Neoplasms
ccle_broad_2019	SNU1040_LARGE_INTESTINE	SNU1040_LARGE_INTESTINE	Colorectal Cancer
ccle_broad_2019	SNU1076_UPPER_AERODIGESTIVE_TRACT	SNU1076_UPPER_AERODIGESTIVE_TRACT	Esophagogastric Cancer
ccle_broad_2019	SNU175_LARGE_INTESTINE	SNU175_LARGE_INTESTINE	Colorectal Cancer
ccle_broad_2019	SNU407_LARGE_INTESTINE	SNU407_LARGE_INTESTINE	Colorectal Cancer
ccle_broad_2019	SNU201_CENTRAL_NERVOUS_SYSTEM	SNU201_CENTRAL_NERVOUS_SYSTEM	Glioma
ccle_broad_2019	KMS20_HAEMATOPOIETIC_AND_LYMPHOID_TISSUE	KMS20_HAEMATOPOIETIC_AND_LYMPHOID_TISSUE	Mature B-Cell Neoplasms
ccle_broad_2019	SNU216_STOMACH	SNU216_STOMACH	Esophagogastric Cancer
ccle_broad_2019	SNU1196_BILIARY_TRACT	SNU1196_BILIARY_TRACT	Hepatobiliary Cancer
ccle_broad_2019	SNU1079_BILIARY_TRACT	SNU1079_BILIARY_TRACT	Hepatobiliary Cancer
ccle_broad_2019	HCC1195_LUNG	HCC1195_LUNG	Non-Small Cell Lung Cancer
ccle_broad_2019	NCIH854_LUNG	NCIH854_LUNG	Non-Small Cell Lung Cancer
ccle_broad_2019	SNU466_CENTRAL_NERVOUS_SYSTEM	SNU466_CENTRAL_NERVOUS_SYSTEM	Glioma
ccle_broad_2019	YD38_UPPER_AERODIGESTIVE_TRACT	YD38_UPPER_AERODIGESTIVE_TRACT	Esophagogastric Cancer
ccle_broad_2019	SNU1105_CENTRAL_NERVOUS_SYSTEM	SNU1105_CENTRAL_NERVOUS_SYSTEM	Glioma
ccle_broad_2019	SNU283_LARGE_INTESTINE	SNU283_LARGE_INTESTINE	Colorectal Cancer
ccle_broad_2019	SNU46_UPPER_AERODIGESTIVE_TRACT	SNU46_UPPER_AERODIGESTIVE_TRACT	Esophagogastric Cancer
ccle_broad_2019	SNU308_BILIARY_TRACT	SNU308_BILIARY_TRACT	Hepatobiliary Cancer
ccle_broad_2019	YD8_UPPER_AERODIGESTIVE_TRACT	YD8_UPPER_AERODIGESTIVE_TRACT	Esophagogastric Cancer
ccle_broad_2019	SNU245_BILIARY_TRACT	SNU245_BILIARY_TRACT	Hepatobiliary Cancer
ccle_broad_2019	SNU478_BILIARY_TRACT	SNU478_BILIARY_TRACT	Hepatobiliary Cancer
ccle_broad_2019	SNU410_PANCREAS	SNU410_PANCREAS	Pancreatic Cancer
ccle_broad_2019	SNU899_UPPER_AERODIGESTIVE_TRACT	SNU899_UPPER_AERODIGESTIVE_TRACT	Esophagogastric Cancer
ccle_broad_2019	SNU503_LARGE_INTESTINE	SNU503_LARGE_INTESTINE	Colorectal Cancer
ccle_broad_2019	SET2_HAEMATOPOIETIC_AND_LYMPHOID_TISSUE	SET2_HAEMATOPOIETIC_AND_LYMPHOID_TISSUE	Leukemia
ccle_broad_2019	SNU738_CENTRAL_NERVOUS_SYSTEM	SNU738_CENTRAL_NERVOUS_SYSTEM	Glioma
ccle_broad_2019	SNU626_CENTRAL_NERVOUS_SYSTEM	SNU626_CENTRAL_NERVOUS_SYSTEM	Glioma
ccle_broad_2019	SNU869_BILIARY_TRACT	SNU869_BILIARY_TRACT	Hepatobiliary Cancer
ccle_broad_2019	SNU878_LIVER	SNU878_LIVER	Hepatobiliary Cancer
ccle_broad_2019	SNU840_OVARY	SNU840_OVARY	Ovarian Cancer
ccle_broad_2019	SNU8_OVARY	SNU8_OVARY	Ovarian Cancer
ccle_broad_2019	NCIH684_LIVER	NCIH684_LIVER	Hepatobiliary Cancer
ccle_broad_2019	IGR39_SKIN	IGR39_SKIN	Melanoma
ccle_broad_2019	DAOY_CENTRAL_NERVOUS_SYSTEM	DAOY_CENTRAL_NERVOUS_SYSTEM	Embryonal Tumor
ccle_broad_2019	HEP3B217_LIVER	HEP3B217_LIVER	Hepatobiliary Cancer
ccle_broad_2019	KYM1_SOFT_TISSUE	KYM1_SOFT_TISSUE	Soft Tissue Sarcoma
ccle_broad_2019	LC1F_LUNG	LC1F_LUNG	Non-Small Cell Lung Cancer
ccle_broad_2019	HLE_LIVER	HLE_LIVER	Hepatobiliary Cancer
ccle_broad_2019	CMK_HAEMATOPOIETIC_AND_LYMPHOID_TISSUE	CMK_HAEMATOPOIETIC_AND_LYMPHOID_TISSUE	Leukemia
ccle_broad_2019	JMSU1_URINARY_TRACT	JMSU1_URINARY_TRACT	Bladder Cancer
ccle_broad_2019	IMR32_AUTONOMIC_GANGLIA	IMR32_AUTONOMIC_GANGLIA	Neuroblastoma
ccle_broad_2019	SUDHL8_HAEMATOPOIETIC_AND_LYMPHOID_TISSUE	SUDHL8_HAEMATOPOIETIC_AND_LYMPHOID_TISSUE	Mature B-Cell Neoplasms
ccle_broad_2019	T3M4_PANCREAS	T3M4_PANCREAS	Pancreatic Cancer
ccle_broad_2019	COLO818_SKIN	COLO818_SKIN	Melanoma
ccle_broad_2019	PK45H_PANCREAS	PK45H_PANCREAS	Pancreatic Cancer
ccle_broad_2019	HEC59_ENDOMETRIUM	HEC59_ENDOMETRIUM	Endometrial Cancer
ccle_broad_2019	CPCN_LUNG	CPCN_LUNG	Small Cell Lung Cancer
ccle_broad_2019	T3M10_LUNG	T3M10_LUNG	Non-Small Cell Lung Cancer
ccle_broad_2019	NUGC2_STOMACH	NUGC2_STOMACH	Esophagogastric Cancer
ccle_broad_2019	PLCPRF5_LIVER	PLCPRF5_LIVER	Hepatobiliary Cancer
ccle_broad_2019	KPNYN_AUTONOMIC_GANGLIA	KPNYN_AUTONOMIC_GANGLIA	Neuroblastoma
ccle_broad_2019	CCFSTTG1_CENTRAL_NERVOUS_SYSTEM	CCFSTTG1_CENTRAL_NERVOUS_SYSTEM	Glioma
ccle_broad_2019	NCIH929_HAEMATOPOIETIC_AND_LYMPHOID_TISSUE	NCIH929_HAEMATOPOIETIC_AND_LYMPHOID_TISSUE	Mature B-Cell Neoplasms
ccle_broad_2019	KMRC3_KIDNEY	KMRC3_KIDNEY	Renal Cell Carcinoma
ccle_broad_2019	NCIH2023_LUNG	NCIH2023_LUNG	Non-Small Cell Lung Cancer
ccle_broad_2019	DMS153_LUNG	DMS153_LUNG	Small Cell Lung Cancer
ccle_broad_2019	NCIH1048_LUNG	NCIH1048_LUNG	Small Cell Lung Cancer
ccle_broad_2019	D341MED_CENTRAL_NERVOUS_SYSTEM	D341MED_CENTRAL_NERVOUS_SYSTEM	Embryonal Tumor
ccle_broad_2019	NCIH660_PROSTATE	NCIH660_PROSTATE	Prostate Cancer
ccle_broad_2019	NCIH1618_LUNG	NCIH1618_LUNG	Small Cell Lung Cancer
ccle_broad_2019	HS675T_FIBROBLAST	HS675T_FIBROBLAST	Colorectal Cancer
ccle_broad_2019	PEER_HAEMATOPOIETIC_AND_LYMPHOID_TISSUE	PEER_HAEMATOPOIETIC_AND_LYMPHOID_TISSUE	T-Lymphoblastic Leukemia/Lymphoma
ccle_broad_2019	SKM1_HAEMATOPOIETIC_AND_LYMPHOID_TISSUE	SKM1_HAEMATOPOIETIC_AND_LYMPHOID_TISSUE	Leukemia
ccle_broad_2019	HT144_SKIN	HT144_SKIN	Melanoma
ccle_broad_2019	SKMEL31_SKIN	SKMEL31_SKIN	Melanoma
ccle_broad_2019	HS839T_FIBROBLAST	HS839T_FIBROBLAST	Melanoma
ccle_broad_2019	HS939T_SKIN	HS939T_SKIN	Melanoma
ccle_broad_2019	OCILY3_HAEMATOPOIETIC_AND_LYMPHOID_TISSUE	OCILY3_HAEMATOPOIETIC_AND_LYMPHOID_TISSUE	Mature B-Cell Neoplasms
ccle_broad_2019	HS819T_FIBROBLAST	HS819T_FIBROBLAST	Bone Cancer
ccle_broad_2019	NCIH69_LUNG	NCIH69_LUNG	Small Cell Lung Cancer
ccle_broad_2019	DV90_LUNG	DV90_LUNG	Non-Small Cell Lung Cancer
ccle_broad_2019	ZR751_BREAST	ZR751_BREAST	Breast Cancer
ccle_broad_2019	KG1_HAEMATOPOIETIC_AND_LYMPHOID_TISSUE	KG1_HAEMATOPOIETIC_AND_LYMPHOID_TISSUE	Leukemia
ccle_broad_2019	SKNBE2_AUTONOMIC_GANGLIA	SKNBE2_AUTONOMIC_GANGLIA	Neuroblastoma
ccle_broad_2019	HCC70_BREAST	HCC70_BREAST	Breast Cancer
ccle_broad_2019	NCIH2452_PLEURA	NCIH2452_PLEURA	Mesothelioma
ccle_broad_2019	SNU1_STOMACH	SNU1_STOMACH	Esophagogastric Cancer
ccle_broad_2019	LOUCY_HAEMATOPOIETIC_AND_LYMPHOID_TISSUE	LOUCY_HAEMATOPOIETIC_AND_LYMPHOID_TISSUE	T-Lymphoblastic Leukemia/Lymphoma
ccle_broad_2019	HCC56_LARGE_INTESTINE	HCC56_LARGE_INTESTINE	Colorectal Cancer
ccle_broad_2019	NCIH1648_LUNG	NCIH1648_LUNG	Non-Small Cell Lung Cancer
ccle_broad_2019	TO175T_FIBROBLAST	TO175T_FIBROBLAST	Hodgkin Lymphoma
ccle_broad_2019	MPP89_PLEURA	MPP89_PLEURA	Mesothelioma
ccle_broad_2019	PANC0813_PANCREAS	PANC0813_PANCREAS	Pancreatic Cancer
ccle_broad_2019	MG63_BONE	MG63_BONE	Bone Cancer
ccle_broad_2019	PK1_PANCREAS	PK1_PANCREAS	Pancreatic Cancer
ccle_broad_2019	HS840T_FIBROBLAST	HS840T_FIBROBLAST	Esophagogastric Cancer
ccle_broad_2019	NCIH23_LUNG	NCIH23_LUNG	Non-Small Cell Lung Cancer
ccle_broad_2019	TE617T_SOFT_TISSUE	TE617T_SOFT_TISSUE	Soft Tissue Sarcoma
ccle_broad_2019	SW1088_CENTRAL_NERVOUS_SYSTEM	SW1088_CENTRAL_NERVOUS_SYSTEM	Glioma
ccle_broad_2019	ISTMES2_PLEURA	ISTMES2_PLEURA	Mesothelioma
ccle_broad_2019	NCIH1373_LUNG	NCIH1373_LUNG	Non-Small Cell Lung Cancer
ccle_broad_2019	NCIH1930_LUNG	NCIH1930_LUNG	Small Cell Lung Cancer
ccle_broad_2019	NCIH1623_LUNG	NCIH1623_LUNG	Non-Small Cell Lung Cancer
ccle_broad_2019	HS229T_FIBROBLAST	HS229T_FIBROBLAST	Non-Small Cell Lung Cancer
ccle_broad_2019	NCIH1838_LUNG	NCIH1838_LUNG	Non-Small Cell Lung Cancer
ccle_broad_2019	NCIH1836_LUNG	NCIH1836_LUNG	Small Cell Lung Cancer
ccle_broad_2019	HS688AT_FIBROBLAST	HS688AT_FIBROBLAST	Melanoma
ccle_broad_2019	PANC0504_PANCREAS	PANC0504_PANCREAS	Pancreatic Cancer
ccle_broad_2019	HS822T_FIBROBLAST	HS822T_FIBROBLAST	Bone Cancer
ccle_broad_2019	BL70_HAEMATOPOIETIC_AND_LYMPHOID_TISSUE	BL70_HAEMATOPOIETIC_AND_LYMPHOID_TISSUE	Mature B-Cell Neoplasms
ccle_broad_2019	CI1_HAEMATOPOIETIC_AND_LYMPHOID_TISSUE	CI1_HAEMATOPOIETIC_AND_LYMPHOID_TISSUE	B-Lymphoblastic Leukemia/Lymphoma
ccle_broad_2019	G292CLONEA141B1_BONE	G292CLONEA141B1_BONE	Bone Cancer
ccle_broad_2019	RCM1_LARGE_INTESTINE	RCM1_LARGE_INTESTINE	Colorectal Cancer
ccle_broad_2019	HS737T_FIBROBLAST	HS737T_FIBROBLAST	Bone Cancer
ccle_broad_2019	HS616T_FIBROBLAST	HS616T_FIBROBLAST	Hodgkin Lymphoma
ccle_broad_2019	HS600T_FIBROBLAST	HS600T_FIBROBLAST	Melanoma
ccle_broad_2019	TE159T_FIBROBLAST	TE159T_FIBROBLAST	Soft Tissue Sarcoma
ccle_broad_2019	A101D_SKIN	A101D_SKIN	Melanoma
ccle_broad_2019	NCIH1755_LUNG	NCIH1755_LUNG	Non-Small Cell Lung Cancer
ccle_broad_2019	RERFLCKJ_LUNG	RERFLCKJ_LUNG	Non-Small Cell Lung Cancer
ccle_broad_2019	NCIH1693_LUNG	NCIH1693_LUNG	Non-Small Cell Lung Cancer
ccle_broad_2019	SW780_URINARY_TRACT	SW780_URINARY_TRACT	Bladder Cancer
ccle_broad_2019	HS683_CENTRAL_NERVOUS_SYSTEM	HS683_CENTRAL_NERVOUS_SYSTEM	Glioma
ccle_broad_2019	RKO_LARGE_INTESTINE	RKO_LARGE_INTESTINE	Colorectal Cancer
ccle_broad_2019	HS729_SOFT_TISSUE	HS729_SOFT_TISSUE	Soft Tissue Sarcoma
ccle_broad_2019	JHOS2_OVARY	JHOS2_OVARY	Ovarian Cancer
ccle_broad_2019	MCF7_BREAST	MCF7_BREAST	Breast Cancer
ccle_broad_2019	U937_HAEMATOPOIETIC_AND_LYMPHOID_TISSUE	U937_HAEMATOPOIETIC_AND_LYMPHOID_TISSUE	Mature B-Cell Neoplasms
ccle_broad_2019	SKLMS1_SOFT_TISSUE	SKLMS1_SOFT_TISSUE	Soft Tissue Sarcoma
ccle_broad_2019	HUTU80_SMALL_INTESTINE	HUTU80_SMALL_INTESTINE	Cancer of Unknown Primary
ccle_broad_2019	HCC202_BREAST	HCC202_BREAST	Breast Cancer
ccle_broad_2019	MEG01_HAEMATOPOIETIC_AND_LYMPHOID_TISSUE	MEG01_HAEMATOPOIETIC_AND_LYMPHOID_TISSUE	Blood Cancer
ccle_broad_2019	REH_HAEMATOPOIETIC_AND_LYMPHOID_TISSUE	REH_HAEMATOPOIETIC_AND_LYMPHOID_TISSUE	B-Lymphoblastic Leukemia/Lymphoma
ccle_broad_2019	ONS76_CENTRAL_NERVOUS_SYSTEM	ONS76_CENTRAL_NERVOUS_SYSTEM	Embryonal Tumor
ccle_broad_2019	RPMI6666_HAEMATOPOIETIC_AND_LYMPHOID_TISSUE	RPMI6666_HAEMATOPOIETIC_AND_LYMPHOID_TISSUE	Hodgkin Lymphoma
ccle_broad_2019	SNUC1_LARGE_INTESTINE	SNUC1_LARGE_INTESTINE	Colorectal Cancer
ccle_broad_2019	SKNDZ_AUTONOMIC_GANGLIA	SKNDZ_AUTONOMIC_GANGLIA	Neuroblastoma
ccle_broad_2019	DMS114_LUNG	DMS114_LUNG	Small Cell Lung Cancer
ccle_broad_2019	TT_OESOPHAGUS	TT_OESOPHAGUS	Esophagogastric Cancer
ccle_broad_2019	OCILY10_HAEMATOPOIETIC_AND_LYMPHOID_TISSUE	OCILY10_HAEMATOPOIETIC_AND_LYMPHOID_TISSUE	Mature B-Cell Neoplasms
ccle_broad_2019	ST486_HAEMATOPOIETIC_AND_LYMPHOID_TISSUE	ST486_HAEMATOPOIETIC_AND_LYMPHOID_TISSUE	Mature B-Cell Neoplasms
ccle_broad_2019	OC314_OVARY	OC314_OVARY	Ovarian Cancer
ccle_broad_2019	SW1353_BONE	SW1353_BONE	Bone Cancer
ccle_broad_2019	MDAMB157_BREAST	MDAMB157_BREAST	Breast Cancer
ccle_broad_2019	LN18_CENTRAL_NERVOUS_SYSTEM	LN18_CENTRAL_NERVOUS_SYSTEM	Glioma
ccle_broad_2019	769P_KIDNEY	769P_KIDNEY	Renal Cell Carcinoma
ccle_broad_2019	786O_KIDNEY	786O_KIDNEY	Renal Cell Carcinoma
ccle_broad_2019	CAOV3_OVARY	CAOV3_OVARY	Ovarian Cancer
ccle_broad_2019	HEPG2_LIVER	HEPG2_LIVER	Hepatobiliary Cancer
ccle_broad_2019	MOLT4_HAEMATOPOIETIC_AND_LYMPHOID_TISSUE	MOLT4_HAEMATOPOIETIC_AND_LYMPHOID_TISSUE	T-Lymphoblastic Leukemia/Lymphoma
ccle_broad_2019	NCIH524_LUNG	NCIH524_LUNG	Small Cell Lung Cancer
ccle_broad_2019	NCIH209_LUNG	NCIH209_LUNG	Small Cell Lung Cancer
ccle_broad_2019	MIAPACA2_PANCREAS	MIAPACA2_PANCREAS	Pancreatic Cancer
ccle_broad_2019	MCAS_OVARY	MCAS_OVARY	Ovarian Cancer
ccle_broad_2019	SBC5_LUNG	SBC5_LUNG	Small Cell Lung Cancer
ccle_broad_2019	COLO829_SKIN	COLO829_SKIN	Melanoma
ccle_broad_2019	VCAP_PROSTATE	VCAP_PROSTATE	Prostate Cancer
ccle_broad_2019	COLO704_OVARY	COLO704_OVARY	Ovarian Cancer
ccle_broad_2019	IPC298_SKIN	IPC298_SKIN	Melanoma
ccle_broad_2019	CAPAN2_PANCREAS	CAPAN2_PANCREAS	Pancreatic Cancer
ccle_broad_2019	EFM192A_BREAST	EFM192A_BREAST	Breast Cancer
ccle_broad_2019	HS766T_PANCREAS	HS766T_PANCREAS	Pancreatic Cancer
ccle_broad_2019	EFO27_OVARY	EFO27_OVARY	Ovarian Cancer
ccle_broad_2019	A2780_OVARY	A2780_OVARY	Ovarian Cancer
ccle_broad_2019	NCIH196_LUNG	NCIH196_LUNG	Small Cell Lung Cancer
ccle_broad_2019	IGROV1_OVARY	IGROV1_OVARY	Ovarian Cancer
ccle_broad_2019	NCIH889_LUNG	NCIH889_LUNG	Small Cell Lung Cancer
ccle_broad_2019	NCIH211_LUNG	NCIH211_LUNG	Small Cell Lung Cancer
ccle_broad_2019	HS571T_OVARY	HS571T_OVARY	Ovarian Cancer
ccle_broad_2019	MDAPCA2B_PROSTATE	MDAPCA2B_PROSTATE	Prostate Cancer
ccle_broad_2019	SKMEL24_SKIN	SKMEL24_SKIN	Melanoma
ccle_broad_2019	K029AX_SKIN	K029AX_SKIN	Melanoma
ccle_broad_2019	HT1376_URINARY_TRACT	HT1376_URINARY_TRACT	Bladder Cancer
ccle_broad_2019	NCIH2171_LUNG	NCIH2171_LUNG	Small Cell Lung Cancer
ccle_broad_2019	PANC1005_PANCREAS	PANC1005_PANCREAS	Pancreatic Cancer
ccle_broad_2019	EVSAT_BREAST	EVSAT_BREAST	Breast Cancer
ccle_broad_2019	HS695T_SKIN	HS695T_SKIN	Melanoma
ccle_broad_2019	CHL1_SKIN	CHL1_SKIN	Melanoma
ccle_broad_2019	LOUNH91_LUNG	LOUNH91_LUNG	Non-Small Cell Lung Cancer
ccle_broad_2019	LK2_LUNG	LK2_LUNG	Non-Small Cell Lung Cancer
ccle_broad_2019	TOV21G_OVARY	TOV21G_OVARY	Ovarian Cancer
ccle_broad_2019	SKMEL3_SKIN	SKMEL3_SKIN	Melanoma
ccle_broad_2019	ASPC1_PANCREAS	ASPC1_PANCREAS	Pancreatic Cancer
ccle_broad_2019	OVSAHO_OVARY	OVSAHO_OVARY	Ovarian Cancer
ccle_broad_2019	NCIH441_LUNG	NCIH441_LUNG	Non-Small Cell Lung Cancer
ccle_broad_2019	RERFLCSQ1_LUNG	RERFLCSQ1_LUNG	Non-Small Cell Lung Cancer
ccle_broad_2019	NCIH2030_LUNG	NCIH2030_LUNG	Non-Small Cell Lung Cancer
ccle_broad_2019	HMCB_SKIN	HMCB_SKIN	Melanoma
ccle_broad_2019	FUOV1_OVARY	FUOV1_OVARY	Ovarian Cancer
ccle_broad_2019	MALME3M_SKIN	MALME3M_SKIN	Melanoma
ccle_broad_2019	KMS12BM_HAEMATOPOIETIC_AND_LYMPHOID_TISSUE	KMS12BM_HAEMATOPOIETIC_AND_LYMPHOID_TISSUE	Mature B-Cell Neoplasms
ccle_broad_2019	T98G_CENTRAL_NERVOUS_SYSTEM	T98G_CENTRAL_NERVOUS_SYSTEM	Glioma
ccle_broad_2019	HL60_HAEMATOPOIETIC_AND_LYMPHOID_TISSUE	HL60_HAEMATOPOIETIC_AND_LYMPHOID_TISSUE	Leukemia
ccle_broad_2019	DBTRG05MG_CENTRAL_NERVOUS_SYSTEM	DBTRG05MG_CENTRAL_NERVOUS_SYSTEM	Glioma
ccle_broad_2019	HEYA8_OVARY	HEYA8_OVARY	Ovarian Cancer
ccle_broad_2019	NCIH2122_LUNG	NCIH2122_LUNG	Non-Small Cell Lung Cancer
ccle_broad_2019	MELJUSO_SKIN	MELJUSO_SKIN	Melanoma
ccle_broad_2019	SW620_LARGE_INTESTINE	SW620_LARGE_INTESTINE	Colorectal Cancer
ccle_broad_2019	HCT116_LARGE_INTESTINE	HCT116_LARGE_INTESTINE	Colorectal Cancer
ccle_broad_2019	VMRCRCZ_KIDNEY	VMRCRCZ_KIDNEY	Kidney Cancer
ccle_broad_2019	DU145_PROSTATE	DU145_PROSTATE	Prostate Cancer
ccle_broad_2019	MM1S_HAEMATOPOIETIC_AND_LYMPHOID_TISSUE	MM1S_HAEMATOPOIETIC_AND_LYMPHOID_TISSUE	Mature B-Cell Neoplasms
ccle_broad_2019	L33_PANCREAS	L33_PANCREAS	Pancreatic Cancer
ccle_broad_2019	SKMEL2_SKIN	SKMEL2_SKIN	Melanoma
ccle_broad_2019	A549_LUNG	A549_LUNG	Non-Small Cell Lung Cancer
ccle_broad_2019	A172_CENTRAL_NERVOUS_SYSTEM	A172_CENTRAL_NERVOUS_SYSTEM	Glioma
ccle_broad_2019	NCIH1975_LUNG	NCIH1975_LUNG	Non-Small Cell Lung Cancer
ccle_broad_2019	COLO679_SKIN	COLO679_SKIN	Melanoma
ccle_broad_2019	KP2_PANCREAS	KP2_PANCREAS	Pancreatic Cancer
ccle_broad_2019	HUH1_LIVER	HUH1_LIVER	Hepatobiliary Cancer
ccle_broad_2019	MDAMB453_BREAST	MDAMB453_BREAST	Breast Cancer
ccle_broad_2019	PANC0403_PANCREAS	PANC0403_PANCREAS	Pancreatic Cancer
ccle_broad_2019	TYKNU_OVARY	TYKNU_OVARY	Ovarian Cancer
ccle_broad_2019	OVISE_OVARY	OVISE_OVARY	Ovarian Cancer
ccle_broad_2019	EFM19_BREAST	EFM19_BREAST	Breast Cancer
ccle_broad_2019	MELHO_SKIN	MELHO_SKIN	Melanoma
ccle_broad_2019	RL_HAEMATOPOIETIC_AND_LYMPHOID_TISSUE	RL_HAEMATOPOIETIC_AND_LYMPHOID_TISSUE	B-Lymphoblastic Leukemia/Lymphoma
ccle_broad_2019	G361_SKIN	G361_SKIN	Melanoma
ccle_broad_2019	NCIH647_LUNG	NCIH647_LUNG	Non-Small Cell Lung Cancer
ccle_broad_2019	GMS10_CENTRAL_NERVOUS_SYSTEM	GMS10_CENTRAL_NERVOUS_SYSTEM	Glioma
ccle_broad_2019	SEM_HAEMATOPOIETIC_AND_LYMPHOID_TISSUE	SEM_HAEMATOPOIETIC_AND_LYMPHOID_TISSUE	B-Lymphoblastic Leukemia/Lymphoma
ccle_broad_2019	HLFA_FIBROBLAST	HLFA_FIBROBLAST	Hepatobiliary Cancer
ccle_broad_2019	42MGBA_CENTRAL_NERVOUS_SYSTEM	42MGBA_CENTRAL_NERVOUS_SYSTEM	Glioma
ccle_broad_2019	HCC44_LUNG	HCC44_LUNG	Non-Small Cell Lung Cancer
ccle_broad_2019	KYSE70_OESOPHAGUS	KYSE70_OESOPHAGUS	Esophagogastric Cancer
ccle_broad_2019	GAMG_CENTRAL_NERVOUS_SYSTEM	GAMG_CENTRAL_NERVOUS_SYSTEM	Glioma
ccle_broad_2019	NCIH522_LUNG	NCIH522_LUNG	Non-Small Cell Lung Cancer
ccle_broad_2019	EN_ENDOMETRIUM	EN_ENDOMETRIUM	Endometrial Cancer
ccle_broad_2019	PK59_PANCREAS	PK59_PANCREAS	Pancreatic Cancer
ccle_broad_2019	COLO741_SKIN	COLO741_SKIN	Melanoma
ccle_broad_2019	HDMYZ_HAEMATOPOIETIC_AND_LYMPHOID_TISSUE	HDMYZ_HAEMATOPOIETIC_AND_LYMPHOID_TISSUE	Hodgkin Lymphoma
ccle_broad_2019	NCIH661_LUNG	NCIH661_LUNG	Non-Small Cell Lung Cancer
ccle_broad_2019	LNCAPCLONEFGC_PROSTATE	LNCAPCLONEFGC_PROSTATE	Prostate Cancer
ccle_broad_2019	LS411N_LARGE_INTESTINE	LS411N_LARGE_INTESTINE	Colorectal Cancer
ccle_broad_2019	HCC78_LUNG	HCC78_LUNG	Non-Small Cell Lung Cancer
ccle_broad_2019	YKG1_CENTRAL_NERVOUS_SYSTEM	YKG1_CENTRAL_NERVOUS_SYSTEM	Glioma
ccle_broad_2019	ESS1_ENDOMETRIUM	ESS1_ENDOMETRIUM	Endometrial Cancer
ccle_broad_2019	U251MG_CENTRAL_NERVOUS_SYSTEM	U251MG_CENTRAL_NERVOUS_SYSTEM	Glioma
ccle_broad_2019	TE11_OESOPHAGUS	TE11_OESOPHAGUS	Esophagogastric Cancer
ccle_broad_2019	KS1_CENTRAL_NERVOUS_SYSTEM	KS1_CENTRAL_NERVOUS_SYSTEM	Glioma
ccle_broad_2019	HEC1A_ENDOMETRIUM	HEC1A_ENDOMETRIUM	Endometrial Cancer
ccle_broad_2019	TE1_OESOPHAGUS	TE1_OESOPHAGUS	Esophagogastric Cancer
ccle_broad_2019	JHUEM2_ENDOMETRIUM	JHUEM2_ENDOMETRIUM	Endometrial Cancer
ccle_broad_2019	MOGGUVW_CENTRAL_NERVOUS_SYSTEM	MOGGUVW_CENTRAL_NERVOUS_SYSTEM	Glioma
ccle_broad_2019	RERFLCAD1_LUNG	RERFLCAD1_LUNG	Non-Small Cell Lung Cancer
ccle_broad_2019	TE5_OESOPHAGUS	TE5_OESOPHAGUS	Esophagogastric Cancer
ccle_broad_2019	KELLY_AUTONOMIC_GANGLIA	KELLY_AUTONOMIC_GANGLIA	Neuroblastoma
ccle_broad_2019	NCIH1155_LUNG	NCIH1155_LUNG	Non-Small Cell Lung Cancer
ccle_broad_2019	TE15_OESOPHAGUS	TE15_OESOPHAGUS	Esophagogastric Cancer
ccle_broad_2019	ABC1_LUNG	ABC1_LUNG	Non-Small Cell Lung Cancer
ccle_broad_2019	8MGBA_CENTRAL_NERVOUS_SYSTEM	8MGBA_CENTRAL_NERVOUS_SYSTEM	Glioma
ccle_broad_2019	NCIH1703_LUNG	NCIH1703_LUNG	Non-Small Cell Lung Cancer
ccle_broad_2019	AGS_STOMACH	AGS_STOMACH	Esophagogastric Cancer
ccle_broad_2019	QGP1_PANCREAS	QGP1_PANCREAS	Pancreatic Cancer
ccle_broad_2019	DETROIT562_UPPER_AERODIGESTIVE_TRACT	DETROIT562_UPPER_AERODIGESTIVE_TRACT	Esophagogastric Cancer
ccle_broad_2019	BT474_BREAST	BT474_BREAST	Breast Cancer
ccle_broad_2019	ACHN_KIDNEY	ACHN_KIDNEY	Kidney Cancer
ccle_broad_2019	LOVO_LARGE_INTESTINE	LOVO_LARGE_INTESTINE	Colorectal Cancer
ccle_broad_2019	NCIH1581_LUNG	NCIH1581_LUNG	Non-Small Cell Lung Cancer
ccle_broad_2019	SCABER_URINARY_TRACT	SCABER_URINARY_TRACT	Bladder Cancer
ccle_broad_2019	SKMEL30_SKIN	SKMEL30_SKIN	Melanoma
ccle_broad_2019	OVKATE_OVARY	OVKATE_OVARY	Ovarian Cancer
ccle_broad_2019	22RV1_PROSTATE	22RV1_PROSTATE	Prostate Cancer
ccle_broad_2019	C32_SKIN	C32_SKIN	Melanoma
ccle_broad_2019	PANC0327_PANCREAS	PANC0327_PANCREAS	Pancreatic Cancer
ccle_broad_2019	RPMI8226_HAEMATOPOIETIC_AND_LYMPHOID_TISSUE	RPMI8226_HAEMATOPOIETIC_AND_LYMPHOID_TISSUE	Mature B-Cell Neoplasms
ccle_broad_2019	ES2_OVARY	ES2_OVARY	Ovarian Cancer
ccle_broad_2019	NCIH1395_LUNG	NCIH1395_LUNG	Non-Small Cell Lung Cancer
ccle_broad_2019	NCIH1781_LUNG	NCIH1781_LUNG	Non-Small Cell Lung Cancer
ccle_broad_2019	LS1034_LARGE_INTESTINE	LS1034_LARGE_INTESTINE	Colorectal Cancer
ccle_broad_2019	G402_SOFT_TISSUE	G402_SOFT_TISSUE	Soft Tissue Sarcoma
ccle_broad_2019	NCIH146_LUNG	NCIH146_LUNG	Small Cell Lung Cancer
ccle_broad_2019	SW48_LARGE_INTESTINE	SW48_LARGE_INTESTINE	Colorectal Cancer
ccle_broad_2019	CHP212_AUTONOMIC_GANGLIA	CHP212_AUTONOMIC_GANGLIA	Neuroblastoma
ccle_broad_2019	LS180_LARGE_INTESTINE	LS180_LARGE_INTESTINE	Colorectal Cancer
ccle_broad_2019	SW403_LARGE_INTESTINE	SW403_LARGE_INTESTINE	Colorectal Cancer
ccle_broad_2019	NCIH747_LARGE_INTESTINE	NCIH747_LARGE_INTESTINE	Colorectal Cancer
ccle_broad_2019	RT4_URINARY_TRACT	RT4_URINARY_TRACT	Bladder Cancer
ccle_broad_2019	KATOIII_STOMACH	KATOIII_STOMACH	Esophagogastric Cancer
ccle_broad_2019	BDCM_HAEMATOPOIETIC_AND_LYMPHOID_TISSUE	BDCM_HAEMATOPOIETIC_AND_LYMPHOID_TISSUE	B-Lymphoblastic Leukemia/Lymphoma
ccle_broad_2019	SW1417_LARGE_INTESTINE	SW1417_LARGE_INTESTINE	Colorectal Cancer
ccle_broad_2019	SW948_LARGE_INTESTINE	SW948_LARGE_INTESTINE	Colorectal Cancer
ccle_broad_2019	HS606T_FIBROBLAST	HS606T_FIBROBLAST	Breast Cancer
ccle_broad_2019	MDAMB415_BREAST	MDAMB415_BREAST	Breast Cancer
ccle_broad_2019	DMS79_LUNG	DMS79_LUNG	Small Cell Lung Cancer
ccle_broad_2019	NCIH2106_LUNG	NCIH2106_LUNG	Non-Small Cell Lung Cancer
ccle_broad_2019	SW579_THYROID	SW579_THYROID	Thyroid Cancer
ccle_broad_2019	MDAMB468_BREAST	MDAMB468_BREAST	Breast Cancer
ccle_broad_2019	NCIH526_LUNG	NCIH526_LUNG	Small Cell Lung Cancer
ccle_broad_2019	TOV112D_OVARY	TOV112D_OVARY	Ovarian Cancer
ccle_broad_2019	BT549_BREAST	BT549_BREAST	Breast Cancer
ccle_broad_2019	NCIH2196_LUNG	NCIH2196_LUNG	Small Cell Lung Cancer
ccle_broad_2019	CAL851_BREAST	CAL851_BREAST	Breast Cancer
ccle_broad_2019	EFO21_OVARY	EFO21_OVARY	Ovarian Cancer
ccle_broad_2019	A375_SKIN	A375_SKIN	Melanoma
ccle_broad_2019	HT29_LARGE_INTESTINE	HT29_LARGE_INTESTINE	Colorectal Cancer
ccle_broad_2019	NCIH446_LUNG	NCIH446_LUNG	Small Cell Lung Cancer
ccle_broad_2019	HS294T_SKIN	HS294T_SKIN	Melanoma
ccle_broad_2019	SKMEL5_SKIN	SKMEL5_SKIN	Melanoma
ccle_broad_2019	HS944T_SKIN	HS944T_SKIN	Melanoma
ccle_broad_2019	TCCPAN2_PANCREAS	TCCPAN2_PANCREAS	Pancreatic Cancer
ccle_broad_2019	DOV13_OVARY	DOV13_OVARY	Ovarian Cancer
ccle_broad_2019	RMGI_OVARY	RMGI_OVARY	Ovarian Cancer
ccle_broad_2019	PC3_PROSTATE	PC3_PROSTATE	Prostate Cancer
ccle_broad_2019	K562_HAEMATOPOIETIC_AND_LYMPHOID_TISSUE	K562_HAEMATOPOIETIC_AND_LYMPHOID_TISSUE	Blood Cancer
ccle_broad_2019	RT112_URINARY_TRACT	RT112_URINARY_TRACT	Bladder Cancer
ccle_broad_2019	NUGC3_STOMACH	NUGC3_STOMACH	Esophagogastric Cancer
ccle_broad_2019	U87MG_CENTRAL_NERVOUS_SYSTEM	U87MG_CENTRAL_NERVOUS_SYSTEM	Glioma
ccle_broad_2019	CAKI2_KIDNEY	CAKI2_KIDNEY	Renal Cell Carcinoma
ccle_broad_2019	OE19_OESOPHAGUS	OE19_OESOPHAGUS	Esophagogastric Cancer
ccle_broad_2019	KMRC2_KIDNEY	KMRC2_KIDNEY	Renal Cell Carcinoma
ccle_broad_2019	JHH2_LIVER	JHH2_LIVER	Hepatobiliary Cancer
ccle_broad_2019	IM95_STOMACH	IM95_STOMACH	Esophagogastric Cancer
ccle_broad_2019	MV411_HAEMATOPOIETIC_AND_LYMPHOID_TISSUE	MV411_HAEMATOPOIETIC_AND_LYMPHOID_TISSUE	Leukemia
ccle_broad_2019	WM2664_SKIN	WM2664_SKIN	Melanoma
ccle_broad_2019	KMRC1_KIDNEY	KMRC1_KIDNEY	Renal Cell Carcinoma
ccle_broad_2019	KM12_LARGE_INTESTINE	KM12_LARGE_INTESTINE	Colorectal Cancer
ccle_broad_2019	T84_LARGE_INTESTINE	T84_LARGE_INTESTINE	Colorectal Cancer
ccle_broad_2019	CALU1_LUNG	CALU1_LUNG	Non-Small Cell Lung Cancer
ccle_broad_2019	LOXIMVI_SKIN	LOXIMVI_SKIN	Melanoma
ccle_broad_2019	NCIH2170_LUNG	NCIH2170_LUNG	Non-Small Cell Lung Cancer
ccle_broad_2019	SQ1_LUNG	SQ1_LUNG	Non-Small Cell Lung Cancer
ccle_broad_2019	AN3CA_ENDOMETRIUM	AN3CA_ENDOMETRIUM	Endometrial Cancer
ccle_broad_2019	NCIH2444_LUNG	NCIH2444_LUNG	Non-Small Cell Lung Cancer
ccle_broad_2019	UACC257_SKIN	UACC257_SKIN	Melanoma
ccle_broad_2019	KYSE510_OESOPHAGUS	KYSE510_OESOPHAGUS	Esophagogastric Cancer
ccle_broad_2019	MOLM13_HAEMATOPOIETIC_AND_LYMPHOID_TISSUE	MOLM13_HAEMATOPOIETIC_AND_LYMPHOID_TISSUE	Leukemia
ccle_broad_2019	HUPT4_PANCREAS	HUPT4_PANCREAS	Pancreatic Cancer
ccle_broad_2019	MOGGCCM_CENTRAL_NERVOUS_SYSTEM	MOGGCCM_CENTRAL_NERVOUS_SYSTEM	Glioma
ccle_broad_2019	KYSE30_OESOPHAGUS	KYSE30_OESOPHAGUS	Esophagogastric Cancer
ccle_broad_2019	KYSE150_OESOPHAGUS	KYSE150_OESOPHAGUS	Esophagogastric Cancer
ccle_broad_2019	PSN1_PANCREAS	PSN1_PANCREAS	Pancreatic Cancer
ccle_broad_2019	NCIH1299_LUNG	NCIH1299_LUNG	Non-Small Cell Lung Cancer
ccle_broad_2019	PATU8988T_PANCREAS	PATU8988T_PANCREAS	Pancreatic Cancer
ccle_broad_2019	IGR37_SKIN	IGR37_SKIN	Melanoma
ccle_broad_2019	LN443_CENTRAL_NERVOUS_SYSTEM	LN443_CENTRAL_NERVOUS_SYSTEM	Glioma
ccle_broad_2019	SLR23_KIDNEY	SLR23_KIDNEY	Kidney Cancer
ccle_broad_2019	HMEL_BREAST	HMEL_BREAST	Breast Cancer
ccle_broad_2019	OELE_OVARY	OELE_OVARY	Ovarian Cancer
ccle_broad_2019	LN235_CENTRAL_NERVOUS_SYSTEM	LN235_CENTRAL_NERVOUS_SYSTEM	Glioma
ccle_broad_2019	LN428_CENTRAL_NERVOUS_SYSTEM	LN428_CENTRAL_NERVOUS_SYSTEM	Glioma
ccle_broad_2019	SLR24_KIDNEY	SLR24_KIDNEY	Kidney Cancer
ccle_broad_2019	EWS502_BONE	EWS502_BONE	Bone Cancer
ccle_broad_2019	SALE_LUNG	SALE_LUNG	Cancer of Unknown Primary
ccle_broad_2019	HCC2814_LUNG	HCC2814_LUNG	Non-Small Cell Lung Cancer
ccle_broad_2019	TIG3TD_FIBROBLAST	TIG3TD_FIBROBLAST	Cancer of Unknown Primary
ccle_broad_2019	TC32_BONE	TC32_BONE	Bone Cancer
ccle_broad_2019	SF172_CENTRAL_NERVOUS_SYSTEM	SF172_CENTRAL_NERVOUS_SYSTEM	Glioma
ccle_broad_2019	PRECLH_PROSTATE	PRECLH_PROSTATE	Prostate Cancer
ccle_broad_2019	U343_CENTRAL_NERVOUS_SYSTEM	U343_CENTRAL_NERVOUS_SYSTEM	Glioma
ccle_broad_2019	LN215_CENTRAL_NERVOUS_SYSTEM	LN215_CENTRAL_NERVOUS_SYSTEM	Glioma
ccle_broad_2019	LN464_CENTRAL_NERVOUS_SYSTEM	LN464_CENTRAL_NERVOUS_SYSTEM	Glioma
ccle_broad_2019	SLR25_KIDNEY	SLR25_KIDNEY	Kidney Cancer
ccle_broad_2019	U178_CENTRAL_NERVOUS_SYSTEM	U178_CENTRAL_NERVOUS_SYSTEM	Glioma
ccle_broad_2019	HEKTE_KIDNEY	HEKTE_KIDNEY	Kidney Cancer
ccle_broad_2019	SLR26_KIDNEY	SLR26_KIDNEY	Kidney Cancer
ccle_broad_2019	SKRC20_KIDNEY	SKRC20_KIDNEY	Renal Cell Carcinoma
ccle_broad_2019	A1207_CENTRAL_NERVOUS_SYSTEM	A1207_CENTRAL_NERVOUS_SYSTEM	Glioma
ccle_broad_2019	LN319_CENTRAL_NERVOUS_SYSTEM	LN319_CENTRAL_NERVOUS_SYSTEM	Glioma
ccle_broad_2019	HCC364_LUNG	HCC364_LUNG	Non-Small Cell Lung Cancer
ccle_broad_2019	LN382_CENTRAL_NERVOUS_SYSTEM	LN382_CENTRAL_NERVOUS_SYSTEM	Glioma
ccle_broad_2019	SLR21_KIDNEY	SLR21_KIDNEY	Kidney Cancer
ccle_broad_2019	LNZ308_CENTRAL_NERVOUS_SYSTEM	LNZ308_CENTRAL_NERVOUS_SYSTEM	Glioma
ccle_broad_2019	LN340_CENTRAL_NERVOUS_SYSTEM	LN340_CENTRAL_NERVOUS_SYSTEM	Glioma
ccle_broad_2019	HCC827GR5_LUNG	HCC827GR5_LUNG	Non-Small Cell Lung Cancer
ccle_broad_2019	SLR20_KIDNEY	SLR20_KIDNEY	Kidney Cancer
ccle_broad_2019	EW8_BONE	EW8_BONE	Bone Cancer
ccle_broad_2019	UOK101_KIDNEY	UOK101_KIDNEY	Renal Cell Carcinoma
ccle_broad_2019	JHESOAD1_OESOPHAGUS	JHESOAD1_OESOPHAGUS	Cancer of Unknown Primary
ccle_broad_2019	MOLP2_HAEMATOPOIETIC_AND_LYMPHOID_TISSUE	MOLP2_HAEMATOPOIETIC_AND_LYMPHOID_TISSUE	Mature B-Cell Neoplasms
ccle_broad_2019	SCC25_UPPER_AERODIGESTIVE_TRACT	SCC25_UPPER_AERODIGESTIVE_TRACT	Esophagogastric Cancer
ccle_broad_2019	UT7_HAEMATOPOIETIC_AND_LYMPHOID_TISSUE	UT7_HAEMATOPOIETIC_AND_LYMPHOID_TISSUE	Leukemia
ccle_broad_2019	MHHNB11_AUTONOMIC_GANGLIA	MHHNB11_AUTONOMIC_GANGLIA	Neuroblastoma
ccle_broad_2019	HCC1806_BREAST	HCC1806_BREAST	Breast Cancer
ccle_broad_2019	GRANTA519_HAEMATOPOIETIC_AND_LYMPHOID_TISSUE	GRANTA519_HAEMATOPOIETIC_AND_LYMPHOID_TISSUE	B-Lymphoblastic Leukemia/Lymphoma
ccle_broad_2019	MONOMAC6_HAEMATOPOIETIC_AND_LYMPHOID_TISSUE	MONOMAC6_HAEMATOPOIETIC_AND_LYMPHOID_TISSUE	Leukemia
ccle_broad_2019	MKN7_STOMACH	MKN7_STOMACH	Esophagogastric Cancer
ccle_broad_2019	SW1710_URINARY_TRACT	SW1710_URINARY_TRACT	Bladder Cancer
ccle_broad_2019	MOLT13_HAEMATOPOIETIC_AND_LYMPHOID_TISSUE	MOLT13_HAEMATOPOIETIC_AND_LYMPHOID_TISSUE	T-Lymphoblastic Leukemia/Lymphoma
ccle_broad_2019	SR786_HAEMATOPOIETIC_AND_LYMPHOID_TISSUE	SR786_HAEMATOPOIETIC_AND_LYMPHOID_TISSUE	T-Lymphoblastic Leukemia/Lymphoma
ccle_broad_2019	SCC15_UPPER_AERODIGESTIVE_TRACT	SCC15_UPPER_AERODIGESTIVE_TRACT	Esophagogastric Cancer
ccle_broad_2019	RS5_FIBROBLAST	RS5_FIBROBLAST	Mesothelioma
ccle_broad_2019	NCIH2126_LUNG	NCIH2126_LUNG	Non-Small Cell Lung Cancer
ccle_broad_2019	NCIH2141_LUNG	NCIH2141_LUNG	Small Cell Lung Cancer
ccle_broad_2019	NCIH1385_LUNG	NCIH1385_LUNG	Non-Small Cell Lung Cancer
ccle_broad_2019	HCC827_LUNG	HCC827_LUNG	Non-Small Cell Lung Cancer
ccle_broad_2019	RD_SOFT_TISSUE	RD_SOFT_TISSUE	Soft Tissue Sarcoma
ccle_broad_2019	TT_THYROID	TT_THYROID	Thyroid Cancer
ccle_broad_2019	TF1_HAEMATOPOIETIC_AND_LYMPHOID_TISSUE	TF1_HAEMATOPOIETIC_AND_LYMPHOID_TISSUE	Leukemia
ccle_broad_2019	HS172T_FIBROBLAST	HS172T_FIBROBLAST	Bladder Cancer
ccle_broad_2019	HS834T_FIBROBLAST	HS834T_FIBROBLAST	Melanoma
ccle_broad_2019	TE125T_FIBROBLAST	TE125T_FIBROBLAST	Soft Tissue Sarcoma
ccle_broad_2019	8305C_THYROID	8305C_THYROID	Thyroid Cancer
ccle_broad_2019	UACC812_BREAST	UACC812_BREAST	Breast Cancer
ccle_broad_2019	ALLSIL_HAEMATOPOIETIC_AND_LYMPHOID_TISSUE	ALLSIL_HAEMATOPOIETIC_AND_LYMPHOID_TISSUE	T-Lymphoblastic Leukemia/Lymphoma
ccle_broad_2019	KASUMI2_HAEMATOPOIETIC_AND_LYMPHOID_TISSUE	KASUMI2_HAEMATOPOIETIC_AND_LYMPHOID_TISSUE	Leukemia
ccle_broad_2019	DND41_HAEMATOPOIETIC_AND_LYMPHOID_TISSUE	DND41_HAEMATOPOIETIC_AND_LYMPHOID_TISSUE	T-Lymphoblastic Leukemia/Lymphoma
ccle_broad_2019	ME1_HAEMATOPOIETIC_AND_LYMPHOID_TISSUE	ME1_HAEMATOPOIETIC_AND_LYMPHOID_TISSUE	Leukemia
ccle_broad_2019	DM3_FIBROBLAST	DM3_FIBROBLAST	T-Lymphoblastic Leukemia/Lymphoma
ccle_broad_2019	JEKO1_HAEMATOPOIETIC_AND_LYMPHOID_TISSUE	JEKO1_HAEMATOPOIETIC_AND_LYMPHOID_TISSUE	B-Lymphoblastic Leukemia/Lymphoma
ccle_broad_2019	JJN3_HAEMATOPOIETIC_AND_LYMPHOID_TISSUE	JJN3_HAEMATOPOIETIC_AND_LYMPHOID_TISSUE	Mature B-Cell Neoplasms
ccle_broad_2019	NUDHL1_HAEMATOPOIETIC_AND_LYMPHOID_TISSUE	NUDHL1_HAEMATOPOIETIC_AND_LYMPHOID_TISSUE	Mature B-Cell Neoplasms
ccle_broad_2019	CL14_LARGE_INTESTINE	CL14_LARGE_INTESTINE	Colorectal Cancer
ccle_broad_2019	KYO1_HAEMATOPOIETIC_AND_LYMPHOID_TISSUE	KYO1_HAEMATOPOIETIC_AND_LYMPHOID_TISSUE	Blood Cancer
ccle_broad_2019	JL1_PLEURA	JL1_PLEURA	Mesothelioma
ccle_broad_2019	CAL148_BREAST	CAL148_BREAST	Breast Cancer
ccle_broad_2019	NALM19_HAEMATOPOIETIC_AND_LYMPHOID_TISSUE	NALM19_HAEMATOPOIETIC_AND_LYMPHOID_TISSUE	B-Lymphoblastic Leukemia/Lymphoma
ccle_broad_2019	HPBALL_HAEMATOPOIETIC_AND_LYMPHOID_TISSUE	HPBALL_HAEMATOPOIETIC_AND_LYMPHOID_TISSUE	T-Lymphoblastic Leukemia/Lymphoma
ccle_broad_2019	SUPT11_HAEMATOPOIETIC_AND_LYMPHOID_TISSUE	SUPT11_HAEMATOPOIETIC_AND_LYMPHOID_TISSUE	T-Lymphoblastic Leukemia/Lymphoma
ccle_broad_2019	CL40_LARGE_INTESTINE	CL40_LARGE_INTESTINE	Colorectal Cancer
ccle_broad_2019	MDAMB134VI_BREAST	MDAMB134VI_BREAST	Breast Cancer
ccle_broad_2019	HCC1500_BREAST	HCC1500_BREAST	Breast Cancer
ccle_broad_2019	HCC1599_BREAST	HCC1599_BREAST	Breast Cancer
ccle_broad_2019	SUPHD1_HAEMATOPOIETIC_AND_LYMPHOID_TISSUE	SUPHD1_HAEMATOPOIETIC_AND_LYMPHOID_TISSUE	Hodgkin Lymphoma
ccle_broad_2019	MOTN1_HAEMATOPOIETIC_AND_LYMPHOID_TISSUE	MOTN1_HAEMATOPOIETIC_AND_LYMPHOID_TISSUE	T-Lymphoblastic Leukemia/Lymphoma
ccle_broad_2019	OCIAML3_HAEMATOPOIETIC_AND_LYMPHOID_TISSUE	OCIAML3_HAEMATOPOIETIC_AND_LYMPHOID_TISSUE	Leukemia
ccle_broad_2019	SUDHL10_HAEMATOPOIETIC_AND_LYMPHOID_TISSUE	SUDHL10_HAEMATOPOIETIC_AND_LYMPHOID_TISSUE	Mature B-Cell Neoplasms
ccle_broad_2019	SUDHL4_HAEMATOPOIETIC_AND_LYMPHOID_TISSUE	SUDHL4_HAEMATOPOIETIC_AND_LYMPHOID_TISSUE	Mature B-Cell Neoplasms
ccle_broad_2019	RH41_SOFT_TISSUE	RH41_SOFT_TISSUE	Soft Tissue Sarcoma
ccle_broad_2019	OCILY19_HAEMATOPOIETIC_AND_LYMPHOID_TISSUE	OCILY19_HAEMATOPOIETIC_AND_LYMPHOID_TISSUE	Mature B-Cell Neoplasms
ccle_broad_2019	MOLM6_HAEMATOPOIETIC_AND_LYMPHOID_TISSUE	MOLM6_HAEMATOPOIETIC_AND_LYMPHOID_TISSUE	Blood Cancer
ccle_broad_2019	SKMM2_HAEMATOPOIETIC_AND_LYMPHOID_TISSUE	SKMM2_HAEMATOPOIETIC_AND_LYMPHOID_TISSUE	Mature B-Cell Neoplasms
ccle_broad_2019	KASUMI6_HAEMATOPOIETIC_AND_LYMPHOID_TISSUE	KASUMI6_HAEMATOPOIETIC_AND_LYMPHOID_TISSUE	Leukemia
ccle_broad_2019	HS698T_FIBROBLAST	HS698T_FIBROBLAST	Colorectal Cancer
ccle_broad_2019	UACC893_BREAST	UACC893_BREAST	Breast Cancer
ccle_broad_2019	MINO_HAEMATOPOIETIC_AND_LYMPHOID_TISSUE	MINO_HAEMATOPOIETIC_AND_LYMPHOID_TISSUE	B-Lymphoblastic Leukemia/Lymphoma
ccle_broad_2019	CHP126_AUTONOMIC_GANGLIA	CHP126_AUTONOMIC_GANGLIA	Neuroblastoma
ccle_broad_2019	COLO680N_OESOPHAGUS	COLO680N_OESOPHAGUS	Esophagogastric Cancer
ccle_broad_2019	COLO678_LARGE_INTESTINE	COLO678_LARGE_INTESTINE	Colorectal Cancer
ccle_broad_2019	LAMA84_HAEMATOPOIETIC_AND_LYMPHOID_TISSUE	LAMA84_HAEMATOPOIETIC_AND_LYMPHOID_TISSUE	Blood Cancer
ccle_broad_2019	CMLT1_HAEMATOPOIETIC_AND_LYMPHOID_TISSUE	CMLT1_HAEMATOPOIETIC_AND_LYMPHOID_TISSUE	Blood Cancer
ccle_broad_2019	EHEB_HAEMATOPOIETIC_AND_LYMPHOID_TISSUE	EHEB_HAEMATOPOIETIC_AND_LYMPHOID_TISSUE	B-Lymphoblastic Leukemia/Lymphoma
ccle_broad_2019	CAL54_KIDNEY	CAL54_KIDNEY	Kidney Cancer
ccle_broad_2019	BV173_HAEMATOPOIETIC_AND_LYMPHOID_TISSUE	BV173_HAEMATOPOIETIC_AND_LYMPHOID_TISSUE	Blood Cancer
ccle_broad_2019	DOHH2_HAEMATOPOIETIC_AND_LYMPHOID_TISSUE	DOHH2_HAEMATOPOIETIC_AND_LYMPHOID_TISSUE	Mature B-Cell Neoplasms
ccle_broad_2019	EOL1_HAEMATOPOIETIC_AND_LYMPHOID_TISSUE	EOL1_HAEMATOPOIETIC_AND_LYMPHOID_TISSUE	Leukemia
ccle_broad_2019	NALM6_HAEMATOPOIETIC_AND_LYMPHOID_TISSUE	NALM6_HAEMATOPOIETIC_AND_LYMPHOID_TISSUE	B-Lymphoblastic Leukemia/Lymphoma
ccle_broad_2019	VMCUB1_URINARY_TRACT	VMCUB1_URINARY_TRACT	Bladder Cancer
ccle_broad_2019	LP1_HAEMATOPOIETIC_AND_LYMPHOID_TISSUE	LP1_HAEMATOPOIETIC_AND_LYMPHOID_TISSUE	Mature B-Cell Neoplasms
ccle_broad_2019	LXF289_LUNG	LXF289_LUNG	Non-Small Cell Lung Cancer
ccle_broad_2019	MONOMAC1_HAEMATOPOIETIC_AND_LYMPHOID_TISSUE	MONOMAC1_HAEMATOPOIETIC_AND_LYMPHOID_TISSUE	Leukemia
ccle_broad_2019	PL21_HAEMATOPOIETIC_AND_LYMPHOID_TISSUE	PL21_HAEMATOPOIETIC_AND_LYMPHOID_TISSUE	Leukemia
ccle_broad_2019	PF382_HAEMATOPOIETIC_AND_LYMPHOID_TISSUE	PF382_HAEMATOPOIETIC_AND_LYMPHOID_TISSUE	T-Lymphoblastic Leukemia/Lymphoma
ccle_broad_2019	NALM1_HAEMATOPOIETIC_AND_LYMPHOID_TISSUE	NALM1_HAEMATOPOIETIC_AND_LYMPHOID_TISSUE	Blood Cancer
ccle_broad_2019	OCIAML2_HAEMATOPOIETIC_AND_LYMPHOID_TISSUE	OCIAML2_HAEMATOPOIETIC_AND_LYMPHOID_TISSUE	Leukemia
ccle_broad_2019	MHHCALL3_HAEMATOPOIETIC_AND_LYMPHOID_TISSUE	MHHCALL3_HAEMATOPOIETIC_AND_LYMPHOID_TISSUE	B-Lymphoblastic Leukemia/Lymphoma
ccle_broad_2019	JURLMK1_HAEMATOPOIETIC_AND_LYMPHOID_TISSUE	JURLMK1_HAEMATOPOIETIC_AND_LYMPHOID_TISSUE	Blood Cancer
ccle_broad_2019	OCIAML5_HAEMATOPOIETIC_AND_LYMPHOID_TISSUE	OCIAML5_HAEMATOPOIETIC_AND_LYMPHOID_TISSUE	Leukemia
ccle_broad_2019	KE37_HAEMATOPOIETIC_AND_LYMPHOID_TISSUE	KE37_HAEMATOPOIETIC_AND_LYMPHOID_TISSUE	Leukemia
ccle_broad_2019	JK1_HAEMATOPOIETIC_AND_LYMPHOID_TISSUE	JK1_HAEMATOPOIETIC_AND_LYMPHOID_TISSUE	Blood Cancer
ccle_broad_2019	RI1_HAEMATOPOIETIC_AND_LYMPHOID_TISSUE	RI1_HAEMATOPOIETIC_AND_LYMPHOID_TISSUE	B-Lymphoblastic Leukemia/Lymphoma
ccle_broad_2019	KARPAS422_HAEMATOPOIETIC_AND_LYMPHOID_TISSUE	KARPAS422_HAEMATOPOIETIC_AND_LYMPHOID_TISSUE	Mature B-Cell Neoplasms
ccle_broad_2019	L540_HAEMATOPOIETIC_AND_LYMPHOID_TISSUE	L540_HAEMATOPOIETIC_AND_LYMPHOID_TISSUE	Hodgkin Lymphoma
ccle_broad_2019	CAL78_BONE	CAL78_BONE	Bone Cancer
ccle_broad_2019	HDQP1_BREAST	HDQP1_BREAST	Breast Cancer
ccle_broad_2019	MHHCALL4_HAEMATOPOIETIC_AND_LYMPHOID_TISSUE	MHHCALL4_HAEMATOPOIETIC_AND_LYMPHOID_TISSUE	B-Lymphoblastic Leukemia/Lymphoma
ccle_broad_2019	MUTZ5_HAEMATOPOIETIC_AND_LYMPHOID_TISSUE	MUTZ5_HAEMATOPOIETIC_AND_LYMPHOID_TISSUE	B-Lymphoblastic Leukemia/Lymphoma
ccle_broad_2019	ONCODG1_OVARY	ONCODG1_OVARY	Ovarian Cancer
ccle_broad_2019	HDLM2_HAEMATOPOIETIC_AND_LYMPHOID_TISSUE	HDLM2_HAEMATOPOIETIC_AND_LYMPHOID_TISSUE	Hodgkin Lymphoma
ccle_broad_2019	CAL29_URINARY_TRACT	CAL29_URINARY_TRACT	Bladder Cancer
ccle_broad_2019	KOPN8_HAEMATOPOIETIC_AND_LYMPHOID_TISSUE	KOPN8_HAEMATOPOIETIC_AND_LYMPHOID_TISSUE	B-Lymphoblastic Leukemia/Lymphoma
ccle_broad_2019	SCLC21H_LUNG	SCLC21H_LUNG	Small Cell Lung Cancer
ccle_broad_2019	CALU3_LUNG	CALU3_LUNG	Non-Small Cell Lung Cancer
ccle_broad_2019	NCIH1435_LUNG	NCIH1435_LUNG	Non-Small Cell Lung Cancer
ccle_broad_2019	NCIH2009_LUNG	NCIH2009_LUNG	Non-Small Cell Lung Cancer
ccle_broad_2019	NCIH1869_LUNG	NCIH1869_LUNG	Non-Small Cell Lung Cancer
ccle_broad_2019	HS852T_SKIN	HS852T_SKIN	Melanoma
ccle_broad_2019	HCC1419_BREAST	HCC1419_BREAST	Breast Cancer
ccle_broad_2019	BT483_BREAST	BT483_BREAST	Breast Cancer
ccle_broad_2019	HS281T_FIBROBLAST	HS281T_FIBROBLAST	Breast Cancer
ccle_broad_2019	HS934T_FIBROBLAST	HS934T_FIBROBLAST	Melanoma
ccle_broad_2019	HCC4006_LUNG	HCC4006_LUNG	Non-Small Cell Lung Cancer
ccle_broad_2019	HCC1428_BREAST	HCC1428_BREAST	Breast Cancer
ccle_broad_2019	KU812_HAEMATOPOIETIC_AND_LYMPHOID_TISSUE	KU812_HAEMATOPOIETIC_AND_LYMPHOID_TISSUE	Blood Cancer
ccle_broad_2019	SHP77_LUNG	SHP77_LUNG	Small Cell Lung Cancer
ccle_broad_2019	TE441T_SOFT_TISSUE	TE441T_SOFT_TISSUE	Soft Tissue Sarcoma
ccle_broad_2019	NB1_AUTONOMIC_GANGLIA	NB1_AUTONOMIC_GANGLIA	Neuroblastoma
ccle_broad_2019	PFEIFFER_HAEMATOPOIETIC_AND_LYMPHOID_TISSUE	PFEIFFER_HAEMATOPOIETIC_AND_LYMPHOID_TISSUE	Mature B-Cell Neoplasms
ccle_broad_2019	ZR7530_BREAST	ZR7530_BREAST	Breast Cancer
ccle_broad_2019	HS863T_FIBROBLAST	HS863T_FIBROBLAST	Bone Cancer
ccle_broad_2019	NCIH841_LUNG	NCIH841_LUNG	Small Cell Lung Cancer
ccle_broad_2019	HS821T_FIBROBLAST	HS821T_FIBROBLAST	Bone Cancer
ccle_broad_2019	NCIH1944_LUNG	NCIH1944_LUNG	Non-Small Cell Lung Cancer
ccle_broad_2019	NCIH2405_LUNG	NCIH2405_LUNG	Non-Small Cell Lung Cancer
ccle_broad_2019	DEL_HAEMATOPOIETIC_AND_LYMPHOID_TISSUE	DEL_HAEMATOPOIETIC_AND_LYMPHOID_TISSUE	T-Lymphoblastic Leukemia/Lymphoma
ccle_broad_2019	BEN_LUNG	BEN_LUNG	Non-Small Cell Lung Cancer
ccle_broad_2019	COLO320_LARGE_INTESTINE	COLO320_LARGE_INTESTINE	Colorectal Cancer
ccle_broad_2019	RPMI8402_HAEMATOPOIETIC_AND_LYMPHOID_TISSUE	RPMI8402_HAEMATOPOIETIC_AND_LYMPHOID_TISSUE	T-Lymphoblastic Leukemia/Lymphoma
ccle_broad_2019	SUDHL1_HAEMATOPOIETIC_AND_LYMPHOID_TISSUE	SUDHL1_HAEMATOPOIETIC_AND_LYMPHOID_TISSUE	T-Lymphoblastic Leukemia/Lymphoma
ccle_broad_2019	P12ICHIKAWA_HAEMATOPOIETIC_AND_LYMPHOID_TISSUE	P12ICHIKAWA_HAEMATOPOIETIC_AND_LYMPHOID_TISSUE	T-Lymphoblastic Leukemia/Lymphoma
ccle_broad_2019	BFTC905_URINARY_TRACT	BFTC905_URINARY_TRACT	Bladder Cancer
ccle_broad_2019	BFTC909_KIDNEY	BFTC909_KIDNEY	Kidney Cancer
ccle_broad_2019	MHHES1_BONE	MHHES1_BONE	Bone Cancer
ccle_broad_2019	JVM3_HAEMATOPOIETIC_AND_LYMPHOID_TISSUE	JVM3_HAEMATOPOIETIC_AND_LYMPHOID_TISSUE	B-Lymphoblastic Leukemia/Lymphoma
ccle_broad_2019	NOMO1_HAEMATOPOIETIC_AND_LYMPHOID_TISSUE	NOMO1_HAEMATOPOIETIC_AND_LYMPHOID_TISSUE	Leukemia
ccle_broad_2019	NCIH727_LUNG	NCIH727_LUNG	Cancer of Unknown Primary
ccle_broad_2019	HS343T_FIBROBLAST	HS343T_FIBROBLAST	Breast Cancer
ccle_broad_2019	HCC2935_LUNG	HCC2935_LUNG	Non-Small Cell Lung Cancer
ccle_broad_2019	HS888T_FIBROBLAST	HS888T_FIBROBLAST	Bone Cancer
ccle_broad_2019	MKN45_STOMACH	MKN45_STOMACH	Esophagogastric Cancer
ccle_broad_2019	8505C_THYROID	8505C_THYROID	Thyroid Cancer
ccle_broad_2019	KU1919_URINARY_TRACT	KU1919_URINARY_TRACT	Bladder Cancer
ccle_broad_2019	KCL22_HAEMATOPOIETIC_AND_LYMPHOID_TISSUE	KCL22_HAEMATOPOIETIC_AND_LYMPHOID_TISSUE	Blood Cancer
ccle_broad_2019	CADOES1_BONE	CADOES1_BONE	Bone Cancer
ccle_broad_2019	EM2_HAEMATOPOIETIC_AND_LYMPHOID_TISSUE	EM2_HAEMATOPOIETIC_AND_LYMPHOID_TISSUE	Blood Cancer
ccle_broad_2019	OPM2_HAEMATOPOIETIC_AND_LYMPHOID_TISSUE	OPM2_HAEMATOPOIETIC_AND_LYMPHOID_TISSUE	Mature B-Cell Neoplasms
ccle_broad_2019	CAL62_THYROID	CAL62_THYROID	Thyroid Cancer
ccle_broad_2019	LCLC103H_LUNG	LCLC103H_LUNG	Non-Small Cell Lung Cancer
ccle_broad_2019	JURKAT_HAEMATOPOIETIC_AND_LYMPHOID_TISSUE	JURKAT_HAEMATOPOIETIC_AND_LYMPHOID_TISSUE	T-Lymphoblastic Leukemia/Lymphoma
ccle_broad_2019	697_HAEMATOPOIETIC_AND_LYMPHOID_TISSUE	697_HAEMATOPOIETIC_AND_LYMPHOID_TISSUE	Leukemia
ccle_broad_2019	MHHCALL2_HAEMATOPOIETIC_AND_LYMPHOID_TISSUE	MHHCALL2_HAEMATOPOIETIC_AND_LYMPHOID_TISSUE	B-Lymphoblastic Leukemia/Lymphoma
ccle_broad_2019	M07E_HAEMATOPOIETIC_AND_LYMPHOID_TISSUE	M07E_HAEMATOPOIETIC_AND_LYMPHOID_TISSUE	Leukemia
ccle_broad_2019	L428_HAEMATOPOIETIC_AND_LYMPHOID_TISSUE	L428_HAEMATOPOIETIC_AND_LYMPHOID_TISSUE	Hodgkin Lymphoma
ccle_broad_2019	MOLT16_HAEMATOPOIETIC_AND_LYMPHOID_TISSUE	MOLT16_HAEMATOPOIETIC_AND_LYMPHOID_TISSUE	T-Lymphoblastic Leukemia/Lymphoma
ccle_broad_2019	NB4_HAEMATOPOIETIC_AND_LYMPHOID_TISSUE	NB4_HAEMATOPOIETIC_AND_LYMPHOID_TISSUE	Leukemia
ccle_broad_2019	LCLC97TM1_LUNG	LCLC97TM1_LUNG	Non-Small Cell Lung Cancer
ccle_broad_2019	2313287_STOMACH	2313287_STOMACH	Esophagogastric Cancer
ccle_broad_2019	BHT101_THYROID	BHT101_THYROID	Thyroid Cancer
ccle_broad_2019	JVM2_HAEMATOPOIETIC_AND_LYMPHOID_TISSUE	JVM2_HAEMATOPOIETIC_AND_LYMPHOID_TISSUE	B-Lymphoblastic Leukemia/Lymphoma
ccle_broad_2019	CAL51_BREAST	CAL51_BREAST	Breast Cancer
ccle_broad_2019	L363_HAEMATOPOIETIC_AND_LYMPHOID_TISSUE	L363_HAEMATOPOIETIC_AND_LYMPHOID_TISSUE	Mature B-Cell Neoplasms
ccle_broad_2019	KMH2_HAEMATOPOIETIC_AND_LYMPHOID_TISSUE	KMH2_HAEMATOPOIETIC_AND_LYMPHOID_TISSUE	Hodgkin Lymphoma
ccle_broad_2019	SIMA_AUTONOMIC_GANGLIA	SIMA_AUTONOMIC_GANGLIA	Neuroblastoma
ccle_broad_2019	NUDUL1_HAEMATOPOIETIC_AND_LYMPHOID_TISSUE	NUDUL1_HAEMATOPOIETIC_AND_LYMPHOID_TISSUE	B-Lymphoblastic Leukemia/Lymphoma
ccle_broad_2019	BC3C_URINARY_TRACT	BC3C_URINARY_TRACT	Bladder Cancer
ccle_broad_2019	SUDHL6_HAEMATOPOIETIC_AND_LYMPHOID_TISSUE	SUDHL6_HAEMATOPOIETIC_AND_LYMPHOID_TISSUE	Mature B-Cell Neoplasms
ccle_broad_2019	KARPAS620_HAEMATOPOIETIC_AND_LYMPHOID_TISSUE	KARPAS620_HAEMATOPOIETIC_AND_LYMPHOID_TISSUE	Mature B-Cell Neoplasms
ccle_broad_2019	REC1_HAEMATOPOIETIC_AND_LYMPHOID_TISSUE	REC1_HAEMATOPOIETIC_AND_LYMPHOID_TISSUE	B-Lymphoblastic Leukemia/Lymphoma
ccle_broad_2019	OCIM1_HAEMATOPOIETIC_AND_LYMPHOID_TISSUE	OCIM1_HAEMATOPOIETIC_AND_LYMPHOID_TISSUE	Leukemia
ccle_broad_2019	MEC1_HAEMATOPOIETIC_AND_LYMPHOID_TISSUE	MEC1_HAEMATOPOIETIC_AND_LYMPHOID_TISSUE	B-Lymphoblastic Leukemia/Lymphoma
ccle_broad_2019	SIGM5_HAEMATOPOIETIC_AND_LYMPHOID_TISSUE	SIGM5_HAEMATOPOIETIC_AND_LYMPHOID_TISSUE	Leukemia
ccle_broad_2019	SUDHL5_HAEMATOPOIETIC_AND_LYMPHOID_TISSUE	SUDHL5_HAEMATOPOIETIC_AND_LYMPHOID_TISSUE	Mature B-Cell Neoplasms
ccle_broad_2019	BCPAP_THYROID	BCPAP_THYROID	Thyroid Cancer
ccle_broad_2019	639V_URINARY_TRACT	639V_URINARY_TRACT	Bladder Cancer
ccle_broad_2019	CL11_LARGE_INTESTINE	CL11_LARGE_INTESTINE	Colorectal Cancer
ccle_broad_2019	TT2609C02_THYROID	TT2609C02_THYROID	Thyroid Cancer
ccle_broad_2019	CL34_LARGE_INTESTINE	CL34_LARGE_INTESTINE	Colorectal Cancer
ccle_broad_2019	RCHACV_HAEMATOPOIETIC_AND_LYMPHOID_TISSUE	RCHACV_HAEMATOPOIETIC_AND_LYMPHOID_TISSUE	Leukemia
ccle_broad_2019	CAL120_BREAST	CAL120_BREAST	Breast Cancer
ccle_broad_2019	647V_URINARY_TRACT	647V_URINARY_TRACT	Bladder Cancer
ccle_broad_2019	RH18_SOFT_TISSUE	RH18_SOFT_TISSUE	Soft Tissue Sarcoma
ccle_broad_2019	MOLM16_HAEMATOPOIETIC_AND_LYMPHOID_TISSUE	MOLM16_HAEMATOPOIETIC_AND_LYMPHOID_TISSUE	Leukemia
ccle_broad_2019	F36P_HAEMATOPOIETIC_AND_LYMPHOID_TISSUE	F36P_HAEMATOPOIETIC_AND_LYMPHOID_TISSUE	Leukemia
ccle_broad_2019	EJM_HAEMATOPOIETIC_AND_LYMPHOID_TISSUE	EJM_HAEMATOPOIETIC_AND_LYMPHOID_TISSUE	Mature B-Cell Neoplasms
ccle_broad_2019	WSUDLCL2_HAEMATOPOIETIC_AND_LYMPHOID_TISSUE	WSUDLCL2_HAEMATOPOIETIC_AND_LYMPHOID_TISSUE	Mature B-Cell Neoplasms
ccle_broad_2019	JIMT1_BREAST	JIMT1_BREAST	Breast Cancer
ccle_broad_2019	ML1_THYROID	ML1_THYROID	Thyroid Cancer
ccle_broad_2019	AMO1_HAEMATOPOIETIC_AND_LYMPHOID_TISSUE	AMO1_HAEMATOPOIETIC_AND_LYMPHOID_TISSUE	Mature B-Cell Neoplasms
ccle_broad_2019	MOLP8_HAEMATOPOIETIC_AND_LYMPHOID_TISSUE	MOLP8_HAEMATOPOIETIC_AND_LYMPHOID_TISSUE	Mature B-Cell Neoplasms
ccle_broad_2019	COLO699_LUNG	COLO699_LUNG	Non-Small Cell Lung Cancer
ccle_broad_2019	JHUEM7_ENDOMETRIUM	JHUEM7_ENDOMETRIUM	Endometrial Cancer
ccle_broad_2019	KP1NL_PANCREAS	KP1NL_PANCREAS	Pancreatic Cancer
ccle_broad_2019	KP1N_PANCREAS	KP1N_PANCREAS	Pancreatic Cancer
ccle_broad_2019	M059J_CENTRAL_NERVOUS_SYSTEM	M059J_CENTRAL_NERVOUS_SYSTEM	Cancer of Unknown Primary
ccle_broad_2019	OE21_OESOPHAGUS	OE21_OESOPHAGUS	Esophagogastric Cancer
ccle_broad_2019	SF8657_SKIN	SF8657_SKIN	Melanoma
ccle_broad_2019	SNUC2B_LARGE_INTESTINE	SNUC2B_LARGE_INTESTINE	Colorectal Cancer
ccle_broad_2019	NCIH2073_LUNG	NCIH2073_LUNG	Non-Small Cell Lung Cancer
ccle_broad_2019	HN_UPPER_AERODIGESTIVE_TRACT	HN_UPPER_AERODIGESTIVE_TRACT	Esophagogastric Cancer
ccle_broad_2019	HRT18_LARGE_INTESTINE	HRT18_LARGE_INTESTINE	Colorectal Cancer
ccle_broad_2019	HNT34_HAEMATOPOIETIC_AND_LYMPHOID_TISSUE	HNT34_HAEMATOPOIETIC_AND_LYMPHOID_TISSUE	Cancer of Unknown Primary
ccle_broad_2019	PLB985_HAEMATOPOIETIC_AND_LYMPHOID_TISSUE	PLB985_HAEMATOPOIETIC_AND_LYMPHOID_TISSUE	Leukemia
ccle_broad_2019	SKNO1_HAEMATOPOIETIC_AND_LYMPHOID_TISSUE	SKNO1_HAEMATOPOIETIC_AND_LYMPHOID_TISSUE	Leukemia
ccle_broad_2019	MOLT3_HAEMATOPOIETIC_AND_LYMPHOID_TISSUE	MOLT3_HAEMATOPOIETIC_AND_LYMPHOID_TISSUE	T-Lymphoblastic Leukemia/Lymphoma
ccle_broad_2019	HOP62_LUNG	HOP62_LUNG	Non-Small Cell Lung Cancer
ccle_broad_2019	EKVX_LUNG	EKVX_LUNG	Non-Small Cell Lung Cancer
ccle_broad_2019	OVCAR5_OVARY	OVCAR5_OVARY	Ovarian Cancer
ccle_broad_2019	UO31_KIDNEY	UO31_KIDNEY	Kidney Cancer
ccle_broad_2019	TK10_KIDNEY	TK10_KIDNEY	Cancer of Unknown Primary
ccle_broad_2019	SF268_CENTRAL_NERVOUS_SYSTEM	SF268_CENTRAL_NERVOUS_SYSTEM	Glioma
ccle_broad_2019	SF539_CENTRAL_NERVOUS_SYSTEM	SF539_CENTRAL_NERVOUS_SYSTEM	Glioma
ccle_broad_2019	SNB75_CENTRAL_NERVOUS_SYSTEM	SNB75_CENTRAL_NERVOUS_SYSTEM	Glioma
ccle_broad_2019	HOP92_LUNG	HOP92_LUNG	Non-Small Cell Lung Cancer
ccle_broad_2019	ACCS_URINARY_TRACT	ACCS_URINARY_TRACT	Bladder Cancer
ccle_broad_2019	MUTZ3_HAEMATOPOIETIC_AND_LYMPHOID_TISSUE	MUTZ3_HAEMATOPOIETIC_AND_LYMPHOID_TISSUE	Leukemia
ccle_broad_2019	A427_LUNG	A427_LUNG	Cancer of Unknown Primary
ccle_broad_2019	BT12_SOFT_TISSUE	BT12_SOFT_TISSUE	Cancer of Unknown Primary
ccle_broad_2019	C8166_HAEMATOPOIETIC_AND_LYMPHOID_TISSUE	C8166_HAEMATOPOIETIC_AND_LYMPHOID_TISSUE	Cancer of Unknown Primary
ccle_broad_2019	CACO2_LARGE_INTESTINE	CACO2_LARGE_INTESTINE	Cancer of Unknown Primary
ccle_broad_2019	HCC2429_LUNG	HCC2429_LUNG	Cancer of Unknown Primary
ccle_broad_2019	HCC2450_LUNG	HCC2450_LUNG	Cancer of Unknown Primary
ccle_broad_2019	HCC461_LUNG	HCC461_LUNG	Cancer of Unknown Primary
ccle_broad_2019	HCC515_LUNG	HCC515_LUNG	Cancer of Unknown Primary
ccle_broad_2019	INA6_HAEMATOPOIETIC_AND_LYMPHOID_TISSUE	INA6_HAEMATOPOIETIC_AND_LYMPHOID_TISSUE	Cancer of Unknown Primary
ccle_broad_2019	KD_SOFT_TISSUE	KD_SOFT_TISSUE	Cancer of Unknown Primary
ccle_broad_2019	KPMRTRY_SOFT_TISSUE	KPMRTRY_SOFT_TISSUE	Cancer of Unknown Primary
ccle_broad_2019	MON_SOFT_TISSUE	MON_SOFT_TISSUE	Cancer of Unknown Primary
ccle_broad_2019	NCIH2004RT_SOFT_TISSUE	NCIH2004RT_SOFT_TISSUE	Cancer of Unknown Primary
ccle_broad_2019	NCIH2077_LUNG	NCIH2077_LUNG	Cancer of Unknown Primary
ccle_broad_2019	NCIH2882_LUNG	NCIH2882_LUNG	Cancer of Unknown Primary
ccle_broad_2019	NCIH2887_LUNG	NCIH2887_LUNG	Cancer of Unknown Primary
ccle_broad_2019	NCIH1819_LUNG	NCIH1819_LUNG	Cancer of Unknown Primary
ccle_broad_2019	NCIH3122_LUNG	NCIH3122_LUNG	Cancer of Unknown Primary
ccle_broad_2019	NHAHTDD_CENTRAL_NERVOUS_SYSTEM	NHAHTDD_CENTRAL_NERVOUS_SYSTEM	Cancer of Unknown Primary
ccle_broad_2019	OCIMY5_HAEMATOPOIETIC_AND_LYMPHOID_TISSUE	OCIMY5_HAEMATOPOIETIC_AND_LYMPHOID_TISSUE	Cancer of Unknown Primary
ccle_broad_2019	OCIMY7_HAEMATOPOIETIC_AND_LYMPHOID_TISSUE	OCIMY7_HAEMATOPOIETIC_AND_LYMPHOID_TISSUE	Cancer of Unknown Primary
ccle_broad_2019	OPM1_HAEMATOPOIETIC_AND_LYMPHOID_TISSUE	OPM1_HAEMATOPOIETIC_AND_LYMPHOID_TISSUE	Cancer of Unknown Primary
ccle_broad_2019	PC9_LUNG	PC9_LUNG	Cancer of Unknown Primary
ccle_broad_2019	SKNEP1_BONE	SKNEP1_BONE	Cancer of Unknown Primary
ccle_broad_2019	SKPNDW_BONE	SKPNDW_BONE	Cancer of Unknown Primary
ccle_broad_2019	STM9101_SOFT_TISSUE	STM9101_SOFT_TISSUE	Cancer of Unknown Primary
ccle_broad_2019	SIHA_CERVIX	SIHA_CERVIX	Cancer of Unknown Primary
ccle_broad_2019	TM87_SOFT_TISSUE	TM87_SOFT_TISSUE	Cancer of Unknown Primary
ccle_broad_2019	TTC709_SOFT_TISSUE	TTC709_SOFT_TISSUE	Cancer of Unknown Primary
ccle_broad_2019	TTC1240_SOFT_TISSUE	TTC1240_SOFT_TISSUE	Cancer of Unknown Primary
ccle_broad_2019	TTC549_SOFT_TISSUE	TTC549_SOFT_TISSUE	Cancer of Unknown Primary
ccle_broad_2019	TTC642_SOFT_TISSUE	TTC642_SOFT_TISSUE	Cancer of Unknown Primary
ccle_broad_2019	BT16_SOFT_TISSUE	BT16_SOFT_TISSUE	Cancer of Unknown Primary
ccle_broad_2019	CW9019_SOFT_TISSUE	CW9019_SOFT_TISSUE	Cancer of Unknown Primary
ccle_broad_2019	D425_CENTRAL_NERVOUS_SYSTEM	D425_CENTRAL_NERVOUS_SYSTEM	Cancer of Unknown Primary
ccle_broad_2019	D458_CENTRAL_NERVOUS_SYSTEM	D458_CENTRAL_NERVOUS_SYSTEM	Cancer of Unknown Primary
ccle_broad_2019	SMSCTR_SOFT_TISSUE	SMSCTR_SOFT_TISSUE	Cancer of Unknown Primary
ccle_broad_2019	BB30HNC_UPPER_AERODIGESTIVE_TRACT	BB30HNC_UPPER_AERODIGESTIVE_TRACT	Cancer of Unknown Primary
ccle_broad_2019	BB49HNC_UPPER_AERODIGESTIVE_TRACT	BB49HNC_UPPER_AERODIGESTIVE_TRACT	Cancer of Unknown Primary
ccle_broad_2019	BICR10_UPPER_AERODIGESTIVE_TRACT	BICR10_UPPER_AERODIGESTIVE_TRACT	Cancer of Unknown Primary
ccle_broad_2019	BICR78_UPPER_AERODIGESTIVE_TRACT	BICR78_UPPER_AERODIGESTIVE_TRACT	Cancer of Unknown Primary
ccle_broad_2019	CA922_UPPER_AERODIGESTIVE_TRACT	CA922_UPPER_AERODIGESTIVE_TRACT	Cancer of Unknown Primary
ccle_broad_2019	DOK_UPPER_AERODIGESTIVE_TRACT	DOK_UPPER_AERODIGESTIVE_TRACT	Cancer of Unknown Primary
ccle_broad_2019	H3118_UPPER_AERODIGESTIVE_TRACT	H3118_UPPER_AERODIGESTIVE_TRACT	Cancer of Unknown Primary
ccle_broad_2019	HO1N1_UPPER_AERODIGESTIVE_TRACT	HO1N1_UPPER_AERODIGESTIVE_TRACT	Cancer of Unknown Primary
ccle_broad_2019	HO1U1_UPPER_AERODIGESTIVE_TRACT	HO1U1_UPPER_AERODIGESTIVE_TRACT	Cancer of Unknown Primary
ccle_broad_2019	JHU011_UPPER_AERODIGESTIVE_TRACT	JHU011_UPPER_AERODIGESTIVE_TRACT	Cancer of Unknown Primary
ccle_broad_2019	JHU022_UPPER_AERODIGESTIVE_TRACT	JHU022_UPPER_AERODIGESTIVE_TRACT	Cancer of Unknown Primary
ccle_broad_2019	KON_UPPER_AERODIGESTIVE_TRACT	KON_UPPER_AERODIGESTIVE_TRACT	Cancer of Unknown Primary
ccle_broad_2019	KOSC2_UPPER_AERODIGESTIVE_TRACT	KOSC2_UPPER_AERODIGESTIVE_TRACT	Cancer of Unknown Primary
ccle_broad_2019	LB771HNC_UPPER_AERODIGESTIVE_TRACT	LB771HNC_UPPER_AERODIGESTIVE_TRACT	Cancer of Unknown Primary
ccle_broad_2019	OSC19_UPPER_AERODIGESTIVE_TRACT	OSC19_UPPER_AERODIGESTIVE_TRACT	Cancer of Unknown Primary
ccle_broad_2019	OSC20_UPPER_AERODIGESTIVE_TRACT	OSC20_UPPER_AERODIGESTIVE_TRACT	Cancer of Unknown Primary
ccle_broad_2019	PCI15A_UPPER_AERODIGESTIVE_TRACT	PCI15A_UPPER_AERODIGESTIVE_TRACT	Cancer of Unknown Primary
ccle_broad_2019	PCI30_UPPER_AERODIGESTIVE_TRACT	PCI30_UPPER_AERODIGESTIVE_TRACT	Cancer of Unknown Primary
ccle_broad_2019	PCI38_UPPER_AERODIGESTIVE_TRACT	PCI38_UPPER_AERODIGESTIVE_TRACT	Cancer of Unknown Primary
ccle_broad_2019	PCI4B_UPPER_AERODIGESTIVE_TRACT	PCI4B_UPPER_AERODIGESTIVE_TRACT	Cancer of Unknown Primary
ccle_broad_2019	PCI6A_UPPER_AERODIGESTIVE_TRACT	PCI6A_UPPER_AERODIGESTIVE_TRACT	Cancer of Unknown Primary
ccle_broad_2019	RPMI2650_UPPER_AERODIGESTIVE_TRACT	RPMI2650_UPPER_AERODIGESTIVE_TRACT	Cancer of Unknown Primary
ccle_broad_2019	SAS_UPPER_AERODIGESTIVE_TRACT	SAS_UPPER_AERODIGESTIVE_TRACT	Cancer of Unknown Primary
ccle_broad_2019	SAT_UPPER_AERODIGESTIVE_TRACT	SAT_UPPER_AERODIGESTIVE_TRACT	Cancer of Unknown Primary
ccle_broad_2019	SKN3_UPPER_AERODIGESTIVE_TRACT	SKN3_UPPER_AERODIGESTIVE_TRACT	Cancer of Unknown Primary
ccle_broad_2019	ESO26_OESOPHAGUS	ESO26_OESOPHAGUS	Cancer of Unknown Primary
ccle_broad_2019	ESO51_OESOPHAGUS	ESO51_OESOPHAGUS	Cancer of Unknown Primary
ccle_broad_2019	FLO1_OESOPHAGUS	FLO1_OESOPHAGUS	Cancer of Unknown Primary
ccle_broad_2019	HCE4_OESOPHAGUS	HCE4_OESOPHAGUS	Cancer of Unknown Primary
ccle_broad_2019	KYAE1_OESOPHAGUS	KYAE1_OESOPHAGUS	Cancer of Unknown Primary
ccle_broad_2019	KYSE220_OESOPHAGUS	KYSE220_OESOPHAGUS	Cancer of Unknown Primary
ccle_broad_2019	KYSE50_OESOPHAGUS	KYSE50_OESOPHAGUS	Cancer of Unknown Primary
ccle_broad_2019	OACM51_OESOPHAGUS	OACM51_OESOPHAGUS	Cancer of Unknown Primary
ccle_broad_2019	OACP4C_OESOPHAGUS	OACP4C_OESOPHAGUS	Cancer of Unknown Primary
ccle_broad_2019	SKGT4_OESOPHAGUS	SKGT4_OESOPHAGUS	Cancer of Unknown Primary
ccle_broad_2019	TE12_OESOPHAGUS	TE12_OESOPHAGUS	Cancer of Unknown Primary
ccle_broad_2019	CESS_HAEMATOPOIETIC_AND_LYMPHOID_TISSUE	CESS_HAEMATOPOIETIC_AND_LYMPHOID_TISSUE	Cancer of Unknown Primary
ccle_broad_2019	CTV1_HAEMATOPOIETIC_AND_LYMPHOID_TISSUE	CTV1_HAEMATOPOIETIC_AND_LYMPHOID_TISSUE	Cancer of Unknown Primary
ccle_broad_2019	KMOE2_HAEMATOPOIETIC_AND_LYMPHOID_TISSUE	KMOE2_HAEMATOPOIETIC_AND_LYMPHOID_TISSUE	Cancer of Unknown Primary
ccle_broad_2019	NKM1_HAEMATOPOIETIC_AND_LYMPHOID_TISSUE	NKM1_HAEMATOPOIETIC_AND_LYMPHOID_TISSUE	Cancer of Unknown Primary
ccle_broad_2019	QIMRWIL_HAEMATOPOIETIC_AND_LYMPHOID_TISSUE	QIMRWIL_HAEMATOPOIETIC_AND_LYMPHOID_TISSUE	Cancer of Unknown Primary
ccle_broad_2019	BALL1_HAEMATOPOIETIC_AND_LYMPHOID_TISSUE	BALL1_HAEMATOPOIETIC_AND_LYMPHOID_TISSUE	Cancer of Unknown Primary
ccle_broad_2019	KARPAS231_HAEMATOPOIETIC_AND_LYMPHOID_TISSUE	KARPAS231_HAEMATOPOIETIC_AND_LYMPHOID_TISSUE	Cancer of Unknown Primary
ccle_broad_2019	MHHPREB1_HAEMATOPOIETIC_AND_LYMPHOID_TISSUE	MHHPREB1_HAEMATOPOIETIC_AND_LYMPHOID_TISSUE	Cancer of Unknown Primary
ccle_broad_2019	MN60_HAEMATOPOIETIC_AND_LYMPHOID_TISSUE	MN60_HAEMATOPOIETIC_AND_LYMPHOID_TISSUE	Cancer of Unknown Primary
ccle_broad_2019	ROS50_HAEMATOPOIETIC_AND_LYMPHOID_TISSUE	ROS50_HAEMATOPOIETIC_AND_LYMPHOID_TISSUE	Cancer of Unknown Primary
ccle_broad_2019	SUPB8_HAEMATOPOIETIC_AND_LYMPHOID_TISSUE	SUPB8_HAEMATOPOIETIC_AND_LYMPHOID_TISSUE	Cancer of Unknown Primary
ccle_broad_2019	U698M_HAEMATOPOIETIC_AND_LYMPHOID_TISSUE	U698M_HAEMATOPOIETIC_AND_LYMPHOID_TISSUE	Cancer of Unknown Primary
ccle_broad_2019	BC1_HAEMATOPOIETIC_AND_LYMPHOID_TISSUE	BC1_HAEMATOPOIETIC_AND_LYMPHOID_TISSUE	Cancer of Unknown Primary
ccle_broad_2019	CROAP2_HAEMATOPOIETIC_AND_LYMPHOID_TISSUE	CROAP2_HAEMATOPOIETIC_AND_LYMPHOID_TISSUE	Cancer of Unknown Primary
ccle_broad_2019	CTB1_HAEMATOPOIETIC_AND_LYMPHOID_TISSUE	CTB1_HAEMATOPOIETIC_AND_LYMPHOID_TISSUE	Cancer of Unknown Primary
ccle_broad_2019	FARAGE_HAEMATOPOIETIC_AND_LYMPHOID_TISSUE	FARAGE_HAEMATOPOIETIC_AND_LYMPHOID_TISSUE	Cancer of Unknown Primary
ccle_broad_2019	JSC1_HAEMATOPOIETIC_AND_LYMPHOID_TISSUE	JSC1_HAEMATOPOIETIC_AND_LYMPHOID_TISSUE	Cancer of Unknown Primary
ccle_broad_2019	KARPAS1106P_HAEMATOPOIETIC_AND_LYMPHOID_TISSUE	KARPAS1106P_HAEMATOPOIETIC_AND_LYMPHOID_TISSUE	Cancer of Unknown Primary
ccle_broad_2019	RCK8_HAEMATOPOIETIC_AND_LYMPHOID_TISSUE	RCK8_HAEMATOPOIETIC_AND_LYMPHOID_TISSUE	Cancer of Unknown Primary
ccle_broad_2019	SCC3_HAEMATOPOIETIC_AND_LYMPHOID_TISSUE	SCC3_HAEMATOPOIETIC_AND_LYMPHOID_TISSUE	Cancer of Unknown Primary
ccle_broad_2019	SLVL_HAEMATOPOIETIC_AND_LYMPHOID_TISSUE	SLVL_HAEMATOPOIETIC_AND_LYMPHOID_TISSUE	Cancer of Unknown Primary
ccle_broad_2019	SUDHL16_HAEMATOPOIETIC_AND_LYMPHOID_TISSUE	SUDHL16_HAEMATOPOIETIC_AND_LYMPHOID_TISSUE	Cancer of Unknown Primary
ccle_broad_2019	TK_HAEMATOPOIETIC_AND_LYMPHOID_TISSUE	TK_HAEMATOPOIETIC_AND_LYMPHOID_TISSUE	Cancer of Unknown Primary
ccle_broad_2019	TUR_HAEMATOPOIETIC_AND_LYMPHOID_TISSUE	TUR_HAEMATOPOIETIC_AND_LYMPHOID_TISSUE	Cancer of Unknown Primary
ccle_broad_2019	VAL_HAEMATOPOIETIC_AND_LYMPHOID_TISSUE	VAL_HAEMATOPOIETIC_AND_LYMPHOID_TISSUE	Cancer of Unknown Primary
ccle_broad_2019	EB3_HAEMATOPOIETIC_AND_LYMPHOID_TISSUE	EB3_HAEMATOPOIETIC_AND_LYMPHOID_TISSUE	Cancer of Unknown Primary
ccle_broad_2019	JIYOYEP2003_HAEMATOPOIETIC_AND_LYMPHOID_TISSUE	JIYOYEP2003_HAEMATOPOIETIC_AND_LYMPHOID_TISSUE	Cancer of Unknown Primary
ccle_broad_2019	P32ISH_HAEMATOPOIETIC_AND_LYMPHOID_TISSUE	P32ISH_HAEMATOPOIETIC_AND_LYMPHOID_TISSUE	Cancer of Unknown Primary
ccle_broad_2019	RAMOS2G64C10_HAEMATOPOIETIC_AND_LYMPHOID_TISSUE	RAMOS2G64C10_HAEMATOPOIETIC_AND_LYMPHOID_TISSUE	Cancer of Unknown Primary
ccle_broad_2019	RPMI8866_HAEMATOPOIETIC_AND_LYMPHOID_TISSUE	RPMI8866_HAEMATOPOIETIC_AND_LYMPHOID_TISSUE	Cancer of Unknown Primary
ccle_broad_2019	MCCAR_HAEMATOPOIETIC_AND_LYMPHOID_TISSUE	MCCAR_HAEMATOPOIETIC_AND_LYMPHOID_TISSUE	Cancer of Unknown Primary
ccle_broad_2019	HC1_HAEMATOPOIETIC_AND_LYMPHOID_TISSUE	HC1_HAEMATOPOIETIC_AND_LYMPHOID_TISSUE	Cancer of Unknown Primary
ccle_broad_2019	MLMA_HAEMATOPOIETIC_AND_LYMPHOID_TISSUE	MLMA_HAEMATOPOIETIC_AND_LYMPHOID_TISSUE	Cancer of Unknown Primary
ccle_broad_2019	MOT_HAEMATOPOIETIC_AND_LYMPHOID_TISSUE	MOT_HAEMATOPOIETIC_AND_LYMPHOID_TISSUE	Cancer of Unknown Primary
ccle_broad_2019	HS445_HAEMATOPOIETIC_AND_LYMPHOID_TISSUE	HS445_HAEMATOPOIETIC_AND_LYMPHOID_TISSUE	Cancer of Unknown Primary
ccle_broad_2019	KY821_HAEMATOPOIETIC_AND_LYMPHOID_TISSUE	KY821_HAEMATOPOIETIC_AND_LYMPHOID_TISSUE	Cancer of Unknown Primary
ccle_broad_2019	ALLPO_HAEMATOPOIETIC_AND_LYMPHOID_TISSUE	ALLPO_HAEMATOPOIETIC_AND_LYMPHOID_TISSUE	Cancer of Unknown Primary
ccle_broad_2019	BE13_HAEMATOPOIETIC_AND_LYMPHOID_TISSUE	BE13_HAEMATOPOIETIC_AND_LYMPHOID_TISSUE	Cancer of Unknown Primary
ccle_broad_2019	GRST_HAEMATOPOIETIC_AND_LYMPHOID_TISSUE	GRST_HAEMATOPOIETIC_AND_LYMPHOID_TISSUE	Cancer of Unknown Primary
ccle_broad_2019	HAL01_HAEMATOPOIETIC_AND_LYMPHOID_TISSUE	HAL01_HAEMATOPOIETIC_AND_LYMPHOID_TISSUE	Cancer of Unknown Primary
ccle_broad_2019	KARPAS45_HAEMATOPOIETIC_AND_LYMPHOID_TISSUE	KARPAS45_HAEMATOPOIETIC_AND_LYMPHOID_TISSUE	Cancer of Unknown Primary
ccle_broad_2019	LC41_HAEMATOPOIETIC_AND_LYMPHOID_TISSUE	LC41_HAEMATOPOIETIC_AND_LYMPHOID_TISSUE	Cancer of Unknown Primary
ccle_broad_2019	P30OHK_HAEMATOPOIETIC_AND_LYMPHOID_TISSUE	P30OHK_HAEMATOPOIETIC_AND_LYMPHOID_TISSUE	Cancer of Unknown Primary
ccle_broad_2019	ATN1_HAEMATOPOIETIC_AND_LYMPHOID_TISSUE	ATN1_HAEMATOPOIETIC_AND_LYMPHOID_TISSUE	Cancer of Unknown Primary
ccle_broad_2019	H9_HAEMATOPOIETIC_AND_LYMPHOID_TISSUE	H9_HAEMATOPOIETIC_AND_LYMPHOID_TISSUE	Cancer of Unknown Primary
ccle_broad_2019	WIL2NS_HAEMATOPOIETIC_AND_LYMPHOID_TISSUE	WIL2NS_HAEMATOPOIETIC_AND_LYMPHOID_TISSUE	Cancer of Unknown Primary
ccle_broad_2019	WSUNHL_HAEMATOPOIETIC_AND_LYMPHOID_TISSUE	WSUNHL_HAEMATOPOIETIC_AND_LYMPHOID_TISSUE	Cancer of Unknown Primary
ccle_broad_2019	YT_HAEMATOPOIETIC_AND_LYMPHOID_TISSUE	YT_HAEMATOPOIETIC_AND_LYMPHOID_TISSUE	Cancer of Unknown Primary
ccle_broad_2019	ARH77_HAEMATOPOIETIC_AND_LYMPHOID_TISSUE	ARH77_HAEMATOPOIETIC_AND_LYMPHOID_TISSUE	Cancer of Unknown Primary
ccle_broad_2019	IM9_HAEMATOPOIETIC_AND_LYMPHOID_TISSUE	IM9_HAEMATOPOIETIC_AND_LYMPHOID_TISSUE	Cancer of Unknown Primary
ccle_broad_2019	CS1_BONE	CS1_BONE	Cancer of Unknown Primary
ccle_broad_2019	CHSA8926_BONE	CHSA8926_BONE	Cancer of Unknown Primary
ccle_broad_2019	ES1_BONE	ES1_BONE	Cancer of Unknown Primary
ccle_broad_2019	ES3_BONE	ES3_BONE	Cancer of Unknown Primary
ccle_broad_2019	ES4_BONE	ES4_BONE	Cancer of Unknown Primary
ccle_broad_2019	ES5_BONE	ES5_BONE	Cancer of Unknown Primary
ccle_broad_2019	ES7_BONE	ES7_BONE	Cancer of Unknown Primary
ccle_broad_2019	ES8_BONE	ES8_BONE	Cancer of Unknown Primary
ccle_broad_2019	EW1_BONE	EW1_BONE	Cancer of Unknown Primary
ccle_broad_2019	EW11_BONE	EW11_BONE	Cancer of Unknown Primary
ccle_broad_2019	EW12_BONE	EW12_BONE	Cancer of Unknown Primary
ccle_broad_2019	EW13_BONE	EW13_BONE	Cancer of Unknown Primary
ccle_broad_2019	EW16_BONE	EW16_BONE	Cancer of Unknown Primary
ccle_broad_2019	EW18_BONE	EW18_BONE	Cancer of Unknown Primary
ccle_broad_2019	EW22_BONE	EW22_BONE	Cancer of Unknown Primary
ccle_broad_2019	EW24_BONE	EW24_BONE	Cancer of Unknown Primary
ccle_broad_2019	EW3_BONE	EW3_BONE	Cancer of Unknown Primary
ccle_broad_2019	EW7_BONE	EW7_BONE	Cancer of Unknown Primary
ccle_broad_2019	CAL72_BONE	CAL72_BONE	Cancer of Unknown Primary
ccle_broad_2019	HUO3N1_BONE	HUO3N1_BONE	Cancer of Unknown Primary
ccle_broad_2019	HUO9_BONE	HUO9_BONE	Cancer of Unknown Primary
ccle_broad_2019	NOS1_BONE	NOS1_BONE	Cancer of Unknown Primary
ccle_broad_2019	NY_BONE	NY_BONE	Cancer of Unknown Primary
ccle_broad_2019	COLO824_BREAST	COLO824_BREAST	Cancer of Unknown Primary
ccle_broad_2019	MDAMB330_BREAST	MDAMB330_BREAST	Cancer of Unknown Primary
ccle_broad_2019	MFM223_BREAST	MFM223_BREAST	Cancer of Unknown Primary
ccle_broad_2019	MRKNU1_BREAST	MRKNU1_BREAST	Cancer of Unknown Primary
ccle_broad_2019	OCUBM_BREAST	OCUBM_BREAST	Cancer of Unknown Primary
ccle_broad_2019	EGI1_BILIARY_TRACT	EGI1_BILIARY_TRACT	Cancer of Unknown Primary
ccle_broad_2019	ETK1_BILIARY_TRACT	ETK1_BILIARY_TRACT	Cancer of Unknown Primary
ccle_broad_2019	TGBC1TKB_BILIARY_TRACT	TGBC1TKB_BILIARY_TRACT	Cancer of Unknown Primary
ccle_broad_2019	TGBC24TKB_BILIARY_TRACT	TGBC24TKB_BILIARY_TRACT	Cancer of Unknown Primary
ccle_broad_2019	CAR1_LARGE_INTESTINE	CAR1_LARGE_INTESTINE	Cancer of Unknown Primary
ccle_broad_2019	GP5D_LARGE_INTESTINE	GP5D_LARGE_INTESTINE	Cancer of Unknown Primary
ccle_broad_2019	HCC2998_LARGE_INTESTINE	HCC2998_LARGE_INTESTINE	Cancer of Unknown Primary
ccle_broad_2019	NCIH630_LARGE_INTESTINE	NCIH630_LARGE_INTESTINE	Cancer of Unknown Primary
ccle_broad_2019	GT3TKB_STOMACH	GT3TKB_STOMACH	Cancer of Unknown Primary
ccle_broad_2019	HSC39_STOMACH	HSC39_STOMACH	Cancer of Unknown Primary
ccle_broad_2019	MKN28_STOMACH	MKN28_STOMACH	Cancer of Unknown Primary
ccle_broad_2019	RF48_STOMACH	RF48_STOMACH	Cancer of Unknown Primary
ccle_broad_2019	SCH_STOMACH	SCH_STOMACH	Cancer of Unknown Primary
ccle_broad_2019	SKGT2_STOMACH	SKGT2_STOMACH	Cancer of Unknown Primary
ccle_broad_2019	SW13_ADRENAL_CORTEX	SW13_ADRENAL_CORTEX	Cancer of Unknown Primary
ccle_broad_2019	BB65RCC_KIDNEY	BB65RCC_KIDNEY	Cancer of Unknown Primary
ccle_broad_2019	HA7RCC_KIDNEY	HA7RCC_KIDNEY	Cancer of Unknown Primary
ccle_broad_2019	LB1047RCC_KIDNEY	LB1047RCC_KIDNEY	Cancer of Unknown Primary
ccle_broad_2019	LB2241RCC_KIDNEY	LB2241RCC_KIDNEY	Cancer of Unknown Primary
ccle_broad_2019	LB996RCC_KIDNEY	LB996RCC_KIDNEY	Cancer of Unknown Primary
ccle_broad_2019	NCC010_KIDNEY	NCC010_KIDNEY	Cancer of Unknown Primary
ccle_broad_2019	NCC021_KIDNEY	NCC021_KIDNEY	Cancer of Unknown Primary
ccle_broad_2019	RCCAB_KIDNEY	RCCAB_KIDNEY	Cancer of Unknown Primary
ccle_broad_2019	RCCER_KIDNEY	RCCER_KIDNEY	Cancer of Unknown Primary
ccle_broad_2019	RCCFG2_KIDNEY	RCCFG2_KIDNEY	Cancer of Unknown Primary
ccle_broad_2019	RCCJW_KIDNEY	RCCJW_KIDNEY	Cancer of Unknown Primary
ccle_broad_2019	RCCMF_KIDNEY	RCCMF_KIDNEY	Cancer of Unknown Primary
ccle_broad_2019	RXF393_KIDNEY	RXF393_KIDNEY	Cancer of Unknown Primary
ccle_broad_2019	SN12C_KIDNEY	SN12C_KIDNEY	Cancer of Unknown Primary
ccle_broad_2019	201T_LUNG	201T_LUNG	Cancer of Unknown Primary
ccle_broad_2019	EMCBAC1_LUNG	EMCBAC1_LUNG	Cancer of Unknown Primary
ccle_broad_2019	EMCBAC2_LUNG	EMCBAC2_LUNG	Cancer of Unknown Primary
ccle_broad_2019	LC2AD_LUNG	LC2AD_LUNG	Cancer of Unknown Primary
ccle_broad_2019	NCIH1993_LUNG	NCIH1993_LUNG	Cancer of Unknown Primary
ccle_broad_2019	NCIH720_LUNG	NCIH720_LUNG	Cancer of Unknown Primary
ccle_broad_2019	NCIH835_LUNG	NCIH835_LUNG	Cancer of Unknown Primary
ccle_broad_2019	UMC11_LUNG	UMC11_LUNG	Cancer of Unknown Primary
ccle_broad_2019	NCIH1770_LUNG	NCIH1770_LUNG	Cancer of Unknown Primary
ccle_broad_2019	NCIH2135_LUNG	NCIH2135_LUNG	Cancer of Unknown Primary
ccle_broad_2019	CORL321_PLEURA	CORL321_PLEURA	Cancer of Unknown Primary
ccle_broad_2019	CORL303_LUNG	CORL303_LUNG	Cancer of Unknown Primary
ccle_broad_2019	CORL32_LUNG	CORL32_LUNG	Cancer of Unknown Primary
ccle_broad_2019	ISTSL1_LUNG	ISTSL1_LUNG	Cancer of Unknown Primary
ccle_broad_2019	ISTSL2_LUNG	ISTSL2_LUNG	Cancer of Unknown Primary
ccle_broad_2019	LB647SCLC_LUNG	LB647SCLC_LUNG	Cancer of Unknown Primary
ccle_broad_2019	LU134A_LUNG	LU134A_LUNG	Cancer of Unknown Primary
ccle_broad_2019	LU135_LUNG	LU135_LUNG	Cancer of Unknown Primary
ccle_broad_2019	LU139_LUNG	LU139_LUNG	Cancer of Unknown Primary
ccle_broad_2019	LU165_LUNG	LU165_LUNG	Cancer of Unknown Primary
ccle_broad_2019	MS1_LUNG	MS1_LUNG	Cancer of Unknown Primary
ccle_broad_2019	NCIH1417_LUNG	NCIH1417_LUNG	Cancer of Unknown Primary
ccle_broad_2019	NCIH1688_LUNG	NCIH1688_LUNG	Cancer of Unknown Primary
ccle_broad_2019	NCIH250_LUNG	NCIH250_LUNG	Cancer of Unknown Primary
ccle_broad_2019	NCIH345_LUNG	NCIH345_LUNG	Cancer of Unknown Primary
ccle_broad_2019	NCIH378_LUNG	NCIH378_LUNG	Cancer of Unknown Primary
ccle_broad_2019	NCIH64_LUNG	NCIH64_LUNG	Cancer of Unknown Primary
ccle_broad_2019	NCIH748_LUNG	NCIH748_LUNG	Cancer of Unknown Primary
ccle_broad_2019	NCIH847_LUNG	NCIH847_LUNG	Cancer of Unknown Primary
ccle_broad_2019	SBC1_LUNG	SBC1_LUNG	Cancer of Unknown Primary
ccle_broad_2019	H2369_PLEURA	H2369_PLEURA	Cancer of Unknown Primary
ccle_broad_2019	NCIH2373_PLEURA	NCIH2373_PLEURA	Cancer of Unknown Primary
ccle_broad_2019	NCIH2461_PLEURA	NCIH2461_PLEURA	Cancer of Unknown Primary
ccle_broad_2019	NCIH2591_PLEURA	NCIH2591_PLEURA	Cancer of Unknown Primary
ccle_broad_2019	NCIH2595_PLEURA	NCIH2595_PLEURA	Cancer of Unknown Primary
ccle_broad_2019	NCIH2722_PLEURA	NCIH2722_PLEURA	Cancer of Unknown Primary
ccle_broad_2019	NCIH2731_PLEURA	NCIH2731_PLEURA	Cancer of Unknown Primary
ccle_broad_2019	NCIH2795_PLEURA	NCIH2795_PLEURA	Cancer of Unknown Primary
ccle_broad_2019	NCIH2803_PLEURA	NCIH2803_PLEURA	Cancer of Unknown Primary
ccle_broad_2019	NCIH2804_PLEURA	NCIH2804_PLEURA	Cancer of Unknown Primary
ccle_broad_2019	NCIH2810_PLEURA	NCIH2810_PLEURA	Cancer of Unknown Primary
ccle_broad_2019	NCIH2818_PLEURA	NCIH2818_PLEURA	Cancer of Unknown Primary
ccle_broad_2019	NCIH2869_PLEURA	NCIH2869_PLEURA	Cancer of Unknown Primary
ccle_broad_2019	H290_PLEURA	H290_PLEURA	Cancer of Unknown Primary
ccle_broad_2019	D247MG_CENTRAL_NERVOUS_SYSTEM	D247MG_CENTRAL_NERVOUS_SYSTEM	Cancer of Unknown Primary
ccle_broad_2019	D263MG_CENTRAL_NERVOUS_SYSTEM	D263MG_CENTRAL_NERVOUS_SYSTEM	Cancer of Unknown Primary
ccle_broad_2019	D336MG_CENTRAL_NERVOUS_SYSTEM	D336MG_CENTRAL_NERVOUS_SYSTEM	Cancer of Unknown Primary
ccle_broad_2019	D392MG_CENTRAL_NERVOUS_SYSTEM	D392MG_CENTRAL_NERVOUS_SYSTEM	Cancer of Unknown Primary
ccle_broad_2019	D502MG_CENTRAL_NERVOUS_SYSTEM	D502MG_CENTRAL_NERVOUS_SYSTEM	Cancer of Unknown Primary
ccle_broad_2019	D542MG_CENTRAL_NERVOUS_SYSTEM	D542MG_CENTRAL_NERVOUS_SYSTEM	Cancer of Unknown Primary
ccle_broad_2019	D566MG_CENTRAL_NERVOUS_SYSTEM	D566MG_CENTRAL_NERVOUS_SYSTEM	Cancer of Unknown Primary
ccle_broad_2019	KNS81FD_CENTRAL_NERVOUS_SYSTEM	KNS81FD_CENTRAL_NERVOUS_SYSTEM	Cancer of Unknown Primary
ccle_broad_2019	LNZTA3WT4_CENTRAL_NERVOUS_SYSTEM	LNZTA3WT4_CENTRAL_NERVOUS_SYSTEM	Cancer of Unknown Primary
ccle_broad_2019	SKMG1_CENTRAL_NERVOUS_SYSTEM	SKMG1_CENTRAL_NERVOUS_SYSTEM	Cancer of Unknown Primary
ccle_broad_2019	PFSK1_CENTRAL_NERVOUS_SYSTEM	PFSK1_CENTRAL_NERVOUS_SYSTEM	Cancer of Unknown Primary
ccle_broad_2019	BE2M17_AUTONOMIC_GANGLIA	BE2M17_AUTONOMIC_GANGLIA	Cancer of Unknown Primary
ccle_broad_2019	CHP134_AUTONOMIC_GANGLIA	CHP134_AUTONOMIC_GANGLIA	Cancer of Unknown Primary
ccle_broad_2019	GIMEN_AUTONOMIC_GANGLIA	GIMEN_AUTONOMIC_GANGLIA	Cancer of Unknown Primary
ccle_broad_2019	GOTO_AUTONOMIC_GANGLIA	GOTO_AUTONOMIC_GANGLIA	Cancer of Unknown Primary
ccle_broad_2019	IMR5_AUTONOMIC_GANGLIA	IMR5_AUTONOMIC_GANGLIA	Cancer of Unknown Primary
ccle_broad_2019	LAN6_AUTONOMIC_GANGLIA	LAN6_AUTONOMIC_GANGLIA	Cancer of Unknown Primary
ccle_broad_2019	NBTU110_AUTONOMIC_GANGLIA	NBTU110_AUTONOMIC_GANGLIA	Cancer of Unknown Primary
ccle_broad_2019	NB10_AUTONOMIC_GANGLIA	NB10_AUTONOMIC_GANGLIA	Cancer of Unknown Primary
ccle_broad_2019	NB12_AUTONOMIC_GANGLIA	NB12_AUTONOMIC_GANGLIA	Cancer of Unknown Primary
ccle_broad_2019	NB13_AUTONOMIC_GANGLIA	NB13_AUTONOMIC_GANGLIA	Cancer of Unknown Primary
ccle_broad_2019	NB14_AUTONOMIC_GANGLIA	NB14_AUTONOMIC_GANGLIA	Cancer of Unknown Primary
ccle_broad_2019	NB17_AUTONOMIC_GANGLIA	NB17_AUTONOMIC_GANGLIA	Cancer of Unknown Primary
ccle_broad_2019	NB5_AUTONOMIC_GANGLIA	NB5_AUTONOMIC_GANGLIA	Cancer of Unknown Primary
ccle_broad_2019	NB6_AUTONOMIC_GANGLIA	NB6_AUTONOMIC_GANGLIA	Cancer of Unknown Primary
ccle_broad_2019	NB69_AUTONOMIC_GANGLIA	NB69_AUTONOMIC_GANGLIA	Cancer of Unknown Primary
ccle_broad_2019	NB7_AUTONOMIC_GANGLIA	NB7_AUTONOMIC_GANGLIA	Cancer of Unknown Primary
ccle_broad_2019	NH12_AUTONOMIC_GANGLIA	NH12_AUTONOMIC_GANGLIA	Cancer of Unknown Primary
ccle_broad_2019	TGW_AUTONOMIC_GANGLIA	TGW_AUTONOMIC_GANGLIA	Cancer of Unknown Primary
ccle_broad_2019	MZ1PC_PANCREAS	MZ1PC_PANCREAS	Cancer of Unknown Primary
ccle_broad_2019	PL18_PANCREAS	PL18_PANCREAS	Cancer of Unknown Primary
ccle_broad_2019	PL4_PANCREAS	PL4_PANCREAS	Cancer of Unknown Primary
ccle_broad_2019	CP50MELB_SKIN	CP50MELB_SKIN	Cancer of Unknown Primary
ccle_broad_2019	CP66MEL_SKIN	CP66MEL_SKIN	Cancer of Unknown Primary
ccle_broad_2019	GAK_SKIN	GAK_SKIN	Cancer of Unknown Primary
ccle_broad_2019	GMEL_SKIN	GMEL_SKIN	Cancer of Unknown Primary
ccle_broad_2019	HMVII_SKIN	HMVII_SKIN	Cancer of Unknown Primary
ccle_broad_2019	ISTMEL1_SKIN	ISTMEL1_SKIN	Cancer of Unknown Primary
ccle_broad_2019	LB2518MEL_SKIN	LB2518MEL_SKIN	Cancer of Unknown Primary
ccle_broad_2019	LB373MELD_SKIN	LB373MELD_SKIN	Cancer of Unknown Primary
ccle_broad_2019	MMACSF_SKIN	MMACSF_SKIN	Cancer of Unknown Primary
ccle_broad_2019	MZ2MEL_SKIN	MZ2MEL_SKIN	Cancer of Unknown Primary
ccle_broad_2019	MZ7MEL_SKIN	MZ7MEL_SKIN	Cancer of Unknown Primary
ccle_broad_2019	WM1552C_SKIN	WM1552C_SKIN	Cancer of Unknown Primary
ccle_broad_2019	WM278_SKIN	WM278_SKIN	Cancer of Unknown Primary
ccle_broad_2019	WM35_SKIN	WM35_SKIN	Cancer of Unknown Primary
ccle_broad_2019	A388_SKIN	A388_SKIN	Cancer of Unknown Primary
ccle_broad_2019	A431_SKIN	A431_SKIN	Cancer of Unknown Primary
ccle_broad_2019	DJM1_SKIN	DJM1_SKIN	Cancer of Unknown Primary
ccle_broad_2019	SW684_SOFT_TISSUE	SW684_SOFT_TISSUE	Cancer of Unknown Primary
ccle_broad_2019	RH1_SOFT_TISSUE	RH1_SOFT_TISSUE	Cancer of Unknown Primary
ccle_broad_2019	MFHINO_SOFT_TISSUE	MFHINO_SOFT_TISSUE	Cancer of Unknown Primary
ccle_broad_2019	SW872_SOFT_TISSUE	SW872_SOFT_TISSUE	Cancer of Unknown Primary
ccle_broad_2019	SW982_SOFT_TISSUE	SW982_SOFT_TISSUE	Cancer of Unknown Primary
ccle_broad_2019	VAESBJ_SOFT_TISSUE	VAESBJ_SOFT_TISSUE	Cancer of Unknown Primary
ccle_broad_2019	ASH3_THYROID	ASH3_THYROID	Cancer of Unknown Primary
ccle_broad_2019	IHH4_THYROID	IHH4_THYROID	Cancer of Unknown Primary
ccle_broad_2019	K5_THYROID	K5_THYROID	Cancer of Unknown Primary
ccle_broad_2019	RO82W1_THYROID	RO82W1_THYROID	Cancer of Unknown Primary
ccle_broad_2019	DSH1_URINARY_TRACT	DSH1_URINARY_TRACT	Cancer of Unknown Primary
ccle_broad_2019	LB831BLC_URINARY_TRACT	LB831BLC_URINARY_TRACT	Cancer of Unknown Primary
ccle_broad_2019	C33A_CERVIX	C33A_CERVIX	Cancer of Unknown Primary
ccle_broad_2019	C4I_CERVIX	C4I_CERVIX	Cancer of Unknown Primary
ccle_broad_2019	CAL39_VULVA	CAL39_VULVA	Cancer of Unknown Primary
ccle_broad_2019	CASKI_CERVIX	CASKI_CERVIX	Cancer of Unknown Primary
ccle_broad_2019	DOTC24510_CERVIX	DOTC24510_CERVIX	Cancer of Unknown Primary
ccle_broad_2019	HT3_CERVIX	HT3_CERVIX	Cancer of Unknown Primary
ccle_broad_2019	ME180_CERVIX	ME180_CERVIX	Cancer of Unknown Primary
ccle_broad_2019	MS751_CERVIX	MS751_CERVIX	Cancer of Unknown Primary
ccle_broad_2019	SISO_CERVIX	SISO_CERVIX	Cancer of Unknown Primary
ccle_broad_2019	SKGIIIA_CERVIX	SKGIIIA_CERVIX	Cancer of Unknown Primary
ccle_broad_2019	SW756_CERVIX	SW756_CERVIX	Cancer of Unknown Primary
ccle_broad_2019	TCYIK_CERVIX	TCYIK_CERVIX	Cancer of Unknown Primary
ccle_broad_2019	HEC1_ENDOMETRIUM	HEC1_ENDOMETRIUM	Cancer of Unknown Primary
ccle_broad_2019	JHOS3_OVARY	JHOS3_OVARY	Cancer of Unknown Primary
ccle_broad_2019	KGN_OVARY	KGN_OVARY	Cancer of Unknown Primary
ccle_broad_2019	OV17R_OVARY	OV17R_OVARY	Cancer of Unknown Primary
ccle_broad_2019	OVCA420_OVARY	OVCA420_OVARY	Cancer of Unknown Primary
ccle_broad_2019	OVMIU_OVARY	OVMIU_OVARY	Cancer of Unknown Primary
ccle_broad_2019	PA1_OVARY	PA1_OVARY	Cancer of Unknown Primary
ccle_broad_2019	PEO1_OVARY	PEO1_OVARY	Cancer of Unknown Primary
ccle_broad_2019	UWB1289_OVARY	UWB1289_OVARY	Cancer of Unknown Primary
ccle_broad_2019	BPH1_PROSTATE	BPH1_PROSTATE	Cancer of Unknown Primary
ccle_broad_2019	PWR1E_PROSTATE	PWR1E_PROSTATE	Cancer of Unknown Primary
ccle_broad_2019	NCCIT_TESTIS	NCCIT_TESTIS	Cancer of Unknown Primary
ccle_broad_2019	NEC8_TESTIS	NEC8_TESTIS	Cancer of Unknown Primary
ccle_broad_2019	NTERA2CLD1_TESTIS	NTERA2CLD1_TESTIS	Cancer of Unknown Primary
ccle_broad_2019	JAR_PLACENTA	JAR_PLACENTA	Cancer of Unknown Primary
ccle_broad_2019	JEG3_PLACENTA	JEG3_PLACENTA	Cancer of Unknown Primary
ccle_broad_2019	SW962_VULVA	SW962_VULVA	Cancer of Unknown Primary
ccle_broad_2019	SKN_ENDOMETRIUM	SKN_ENDOMETRIUM	Cancer of Unknown Primary
ccle_broad_2019	BC3_HAEMATOPOIETIC_AND_LYMPHOID_TISSUE	BC3_HAEMATOPOIETIC_AND_LYMPHOID_TISSUE	Cancer of Unknown Primary
ccle_broad_2019	BONNA12_HAEMATOPOIETIC_AND_LYMPHOID_TISSUE	BONNA12_HAEMATOPOIETIC_AND_LYMPHOID_TISSUE	Cancer of Unknown Primary
ccle_broad_2019	ES6_BONE	ES6_BONE	Cancer of Unknown Primary
ccle_broad_2019	DIFI_LARGE_INTESTINE	DIFI_LARGE_INTESTINE	Cancer of Unknown Primary
ccle_broad_2019	RCCJF_KIDNEY	RCCJF_KIDNEY	Cancer of Unknown Primary
ccle_broad_2019	SW156_KIDNEY	SW156_KIDNEY	Cancer of Unknown Primary
ccle_broad_2019	PC3JPC3_LUNG	PC3JPC3_LUNG	Cancer of Unknown Primary
ccle_broad_2019	NCIH740_LUNG	NCIH740_LUNG	Cancer of Unknown Primary
ccle_broad_2019	NCIH1304_LUNG	NCIH1304_LUNG	Cancer of Unknown Primary
ccle_broad_2019	D423MG_CENTRAL_NERVOUS_SYSTEM	D423MG_CENTRAL_NERVOUS_SYSTEM	Cancer of Unknown Primary
ccle_broad_2019	KPNYS_AUTONOMIC_GANGLIA	KPNYS_AUTONOMIC_GANGLIA	Cancer of Unknown Primary
ccle_broad_2019	MCIXC_AUTONOMIC_GANGLIA	MCIXC_AUTONOMIC_GANGLIA	Cancer of Unknown Primary
ccle_broad_2019	CP67MEL_SKIN	CP67MEL_SKIN	Cancer of Unknown Primary
ccle_broad_2019	HS633T_SOFT_TISSUE	HS633T_SOFT_TISSUE	Cancer of Unknown Primary
ccle_broad_2019	OMC1_CERVIX	OMC1_CERVIX	Cancer of Unknown Primary
ccle_broad_2019	HEY_OVARY	HEY_OVARY	Cancer of Unknown Primary
ccle_broad_2019	JHU029_UPPER_AERODIGESTIVE_TRACT	JHU029_UPPER_AERODIGESTIVE_TRACT	Cancer of Unknown Primary
ccle_broad_2019	SCC90_UPPER_AERODIGESTIVE_TRACT	SCC90_UPPER_AERODIGESTIVE_TRACT	Cancer of Unknown Primary
ccle_broad_2019	OCILY7_HAEMATOPOIETIC_AND_LYMPHOID_TISSUE	OCILY7_HAEMATOPOIETIC_AND_LYMPHOID_TISSUE	Cancer of Unknown Primary
ccle_broad_2019	CHSA0011_BONE	CHSA0011_BONE	Cancer of Unknown Primary
ccle_broad_2019	CHSA0108_BONE	CHSA0108_BONE	Cancer of Unknown Primary
ccle_broad_2019	K2_SKIN	K2_SKIN	Cancer of Unknown Primary
ccle_broad_2019	STS0421_SOFT_TISSUE	STS0421_SOFT_TISSUE	Cancer of Unknown Primary
ccle_broad_2019	MYM12_HAEMATOPOIETIC_AND_LYMPHOID_TISSUE	MYM12_HAEMATOPOIETIC_AND_LYMPHOID_TISSUE	Cancer of Unknown Primary
ccle_broad_2019	NK92MI_HAEMATOPOIETIC_AND_LYMPHOID_TISSUE	NK92MI_HAEMATOPOIETIC_AND_LYMPHOID_TISSUE	Cancer of Unknown Primary
ccle_broad_2019	YMB1E_BREAST	YMB1E_BREAST	Cancer of Unknown Primary
ccle_broad_2019	RERFLCFM_LUNG	RERFLCFM_LUNG	Cancer of Unknown Primary
ccle_broad_2019	D245MG_CENTRAL_NERVOUS_SYSTEM	D245MG_CENTRAL_NERVOUS_SYSTEM	Cancer of Unknown Primary
ccle_broad_2019	VMRCMELG_SKIN	VMRCMELG_SKIN	Cancer of Unknown Primary
ccle_broad_2019	OVCA433_OVARY	OVCA433_OVARY	Cancer of Unknown Primary
ccle_broad_2019	TMK1_STOMACH	TMK1_STOMACH	Cancer of Unknown Primary
ccle_broad_2019	SC1_HAEMATOPOIETIC_AND_LYMPHOID_TISSUE	SC1_HAEMATOPOIETIC_AND_LYMPHOID_TISSUE	Cancer of Unknown Primary
ccle_broad_2019	UCH2_BONE	UCH2_BONE	Cancer of Unknown Primary
ccle_broad_2019	ML2_HAEMATOPOIETIC_AND_LYMPHOID_TISSUE	ML2_HAEMATOPOIETIC_AND_LYMPHOID_TISSUE	Cancer of Unknown Primary
ccle_broad_2019	DG75_HAEMATOPOIETIC_AND_LYMPHOID_TISSUE	DG75_HAEMATOPOIETIC_AND_LYMPHOID_TISSUE	Cancer of Unknown Primary
ccle_broad_2019	CCRFCEM_HAEMATOPOIETIC_AND_LYMPHOID_TISSUE	CCRFCEM_HAEMATOPOIETIC_AND_LYMPHOID_TISSUE	Cancer of Unknown Primary
ccle_broad_2019	HEMCSS_BONE	HEMCSS_BONE	Cancer of Unknown Primary
ccle_broad_2019	NCIH187_LUNG	NCIH187_LUNG	Cancer of Unknown Primary
ccle_broad_2019	SBC3_LUNG	SBC3_LUNG	Cancer of Unknown Primary
ccle_broad_2019	NCIH513_PLEURA	NCIH513_PLEURA	Cancer of Unknown Primary
ccle_broad_2019	KINGS1_CENTRAL_NERVOUS_SYSTEM	KINGS1_CENTRAL_NERVOUS_SYSTEM	Cancer of Unknown Primary
ccle_broad_2019	LN405_CENTRAL_NERVOUS_SYSTEM	LN405_CENTRAL_NERVOUS_SYSTEM	Cancer of Unknown Primary
ccle_broad_2019	NO10_CENTRAL_NERVOUS_SYSTEM	NO10_CENTRAL_NERVOUS_SYSTEM	Cancer of Unknown Primary
ccle_broad_2019	NO11_CENTRAL_NERVOUS_SYSTEM	NO11_CENTRAL_NERVOUS_SYSTEM	Cancer of Unknown Primary
ccle_broad_2019	451LU_SKIN	451LU_SKIN	Cancer of Unknown Primary
ccle_broad_2019	M14_SKIN	M14_SKIN	Cancer of Unknown Primary
ccle_broad_2019	HTCC3_THYROID	HTCC3_THYROID	Cancer of Unknown Primary
ccle_broad_2019	HELA_CERVIX	HELA_CERVIX	Cancer of Unknown Primary
ccle_broad_2019	NCIH128_LUNG	NCIH128_LUNG	Cancer of Unknown Primary
ccle_broad_2019	MEL202_EYE	MEL202_EYE	Cancer of Unknown Primary
ccle_broad_2019	KMH2_THYROID	KMH2_THYROID	Cancer of Unknown Primary
ccle_broad_2019	MC1010_HAEMATOPOIETIC_AND_LYMPHOID_TISSUE	MC1010_HAEMATOPOIETIC_AND_LYMPHOID_TISSUE	Cancer of Unknown Primary
ccle_broad_2019	LIM1215_LARGE_INTESTINE	LIM1215_LARGE_INTESTINE	Cancer of Unknown Primary
ccle_broad_2019	MCC13_SKIN	MCC13_SKIN	Cancer of Unknown Primary
ccle_broad_2019	TASK1_CENTRAL_NERVOUS_SYSTEM	TASK1_CENTRAL_NERVOUS_SYSTEM	Cancer of Unknown Primary
ccle_broad_2019	UDSCC2_UPPER_AERODIGESTIVE_TRACT	UDSCC2_UPPER_AERODIGESTIVE_TRACT	Cancer of Unknown Primary
ccle_broad_2019	SARC9371_BONE	SARC9371_BONE	Cancer of Unknown Primary
ccle_broad_2019	MCC26_SKIN	MCC26_SKIN	Cancer of Unknown Primary
ccle_broad_2019	NBSUSSR_AUTONOMIC_GANGLIA	NBSUSSR_AUTONOMIC_GANGLIA	Cancer of Unknown Primary
ccle_broad_2019	GEO_LARGE_INTESTINE	GEO_LARGE_INTESTINE	Cancer of Unknown Primary
ccle_broad_2019	LC1SQ_LUNG	LC1SQ_LUNG	Cancer of Unknown Primary
ccle_broad_2019	HS604T_HAEMATOPOIETIC_AND_LYMPHOID_TISSUE	HS604T_HAEMATOPOIETIC_AND_LYMPHOID_TISSUE	Mixed Cancer Types
ccle_broad_2019	HS751T_HAEMATOPOIETIC_AND_LYMPHOID_TISSUE	HS751T_HAEMATOPOIETIC_AND_LYMPHOID_TISSUE	Mixed Cancer Types
ccle_broad_2019	SF767_CENTRAL_NERVOUS_SYSTEM	SF767_CENTRAL_NERVOUS_SYSTEM	Mixed Cancer Types
ccle_broad_2019	HS274T_BREAST	HS274T_BREAST	Mixed Cancer Types
ccle_broad_2019	S117_SOFT_TISSUE	S117_SOFT_TISSUE	Mixed Cancer Types
ccle_broad_2019	127399_SOFT_TISSUE	127399_SOFT_TISSUE	Mixed Cancer Types
ccle_broad_2019	ANGMCSS_CENTRAL_NERVOUS_SYSTEM	ANGMCSS_CENTRAL_NERVOUS_SYSTEM	Mixed Cancer Types
ccle_broad_2019	BIN67_OVARY	BIN67_OVARY	Mixed Cancer Types
ccle_broad_2019	C10_LARGE_INTESTINE	C10_LARGE_INTESTINE	Mixed Cancer Types
ccle_broad_2019	C125PM_LARGE_INTESTINE	C125PM_LARGE_INTESTINE	Mixed Cancer Types
ccle_broad_2019	C75_LARGE_INTESTINE	C75_LARGE_INTESTINE	Mixed Cancer Types
ccle_broad_2019	C80_LARGE_INTESTINE	C80_LARGE_INTESTINE	Mixed Cancer Types
ccle_broad_2019	C84_LARGE_INTESTINE	C84_LARGE_INTESTINE	Mixed Cancer Types
ccle_broad_2019	C99_LARGE_INTESTINE	C99_LARGE_INTESTINE	Mixed Cancer Types
ccle_broad_2019	CHLA06ATRT_SOFT_TISSUE	CHLA06ATRT_SOFT_TISSUE	Mixed Cancer Types
ccle_broad_2019	CHLA15_AUTONOMIC_GANGLIA	CHLA15_AUTONOMIC_GANGLIA	Mixed Cancer Types
ccle_broad_2019	CHLA218_BONE	CHLA218_BONE	Mixed Cancer Types
ccle_broad_2019	CHLA258_BONE	CHLA258_BONE	Mixed Cancer Types
ccle_broad_2019	CHLA266_SOFT_TISSUE	CHLA266_SOFT_TISSUE	Mixed Cancer Types
ccle_broad_2019	CHLA32_BONE	CHLA32_BONE	Mixed Cancer Types
ccle_broad_2019	CHLA57_BONE	CHLA57_BONE	Mixed Cancer Types
ccle_broad_2019	CHLA99_BONE	CHLA99_BONE	Mixed Cancer Types
ccle_broad_2019	CHLA9_BONE	CHLA9_BONE	Mixed Cancer Types
ccle_broad_2019	CME1_SOFT_TISSUE	CME1_SOFT_TISSUE	Mixed Cancer Types
ccle_broad_2019	COGAR359_SOFT_TISSUE	COGAR359_SOFT_TISSUE	Mixed Cancer Types
ccle_broad_2019	COGE352_BONE	COGE352_BONE	Mixed Cancer Types
ccle_broad_2019	COGN278_AUTONOMIC_GANGLIA	COGN278_AUTONOMIC_GANGLIA	Mixed Cancer Types
ccle_broad_2019	COGN305_AUTONOMIC_GANGLIA	COGN305_AUTONOMIC_GANGLIA	Mixed Cancer Types
ccle_broad_2019	COLO794_SKIN	COLO794_SKIN	Mixed Cancer Types
ccle_broad_2019	DERL2_HAEMATOPOIETIC_AND_LYMPHOID_TISSUE	DERL2_HAEMATOPOIETIC_AND_LYMPHOID_TISSUE	Mixed Cancer Types
ccle_broad_2019	DIPG007_CENTRAL_NERVOUS_SYSTEM	DIPG007_CENTRAL_NERVOUS_SYSTEM	Mixed Cancer Types
ccle_broad_2019	DL40_HAEMATOPOIETIC_AND_LYMPHOID_TISSUE	DL40_HAEMATOPOIETIC_AND_LYMPHOID_TISSUE	Mixed Cancer Types
ccle_broad_2019	EWS834_BONE	EWS834_BONE	Mixed Cancer Types
ccle_broad_2019	FEPD_HAEMATOPOIETIC_AND_LYMPHOID_TISSUE	FEPD_HAEMATOPOIETIC_AND_LYMPHOID_TISSUE	Mixed Cancer Types
ccle_broad_2019	GBM001_CENTRAL_NERVOUS_SYSTEM	GBM001_CENTRAL_NERVOUS_SYSTEM	Mixed Cancer Types
ccle_broad_2019	HKA1_SKIN	HKA1_SKIN	Mixed Cancer Types
ccle_broad_2019	HMY1_SKIN	HMY1_SKIN	Mixed Cancer Types
ccle_broad_2019	HSC1_SKIN	HSC1_SKIN	Mixed Cancer Types
ccle_broad_2019	JHC7_BONE	JHC7_BONE	Mixed Cancer Types
ccle_broad_2019	JOPACA1_PANCREAS	JOPACA1_PANCREAS	Mixed Cancer Types
ccle_broad_2019	KARPAS384_HAEMATOPOIETIC_AND_LYMPHOID_TISSUE	KARPAS384_HAEMATOPOIETIC_AND_LYMPHOID_TISSUE	Mixed Cancer Types
ccle_broad_2019	KHYG_HAEMATOPOIETIC_AND_LYMPHOID_TISSUE	KHYG_HAEMATOPOIETIC_AND_LYMPHOID_TISSUE	Mixed Cancer Types
ccle_broad_2019	L82_HAEMATOPOIETIC_AND_LYMPHOID_TISSUE	L82_HAEMATOPOIETIC_AND_LYMPHOID_TISSUE	Mixed Cancer Types
ccle_broad_2019	LAN2_AUTONOMIC_GANGLIA	LAN2_AUTONOMIC_GANGLIA	Mixed Cancer Types
ccle_broad_2019	MAC2A_HAEMATOPOIETIC_AND_LYMPHOID_TISSUE	MAC2A_HAEMATOPOIETIC_AND_LYMPHOID_TISSUE	Mixed Cancer Types
ccle_broad_2019	MB1_THYROID	MB1_THYROID	Mixed Cancer Types
ccle_broad_2019	MCC142_SKIN	MCC142_SKIN	Mixed Cancer Types
ccle_broad_2019	MERO14_LUNG	MERO14_LUNG	Mixed Cancer Types
ccle_broad_2019	MERO25_LUNG	MERO25_LUNG	Mixed Cancer Types
ccle_broad_2019	MERO41_LUNG	MERO41_LUNG	Mixed Cancer Types
ccle_broad_2019	MERO48A_LUNG	MERO48A_LUNG	Mixed Cancer Types
ccle_broad_2019	MERO82_LUNG	MERO82_LUNG	Mixed Cancer Types
ccle_broad_2019	MERO83_LUNG	MERO83_LUNG	Mixed Cancer Types
ccle_broad_2019	MERO84_LUNG	MERO84_LUNG	Mixed Cancer Types
ccle_broad_2019	MERO95_LUNG	MERO95_LUNG	Mixed Cancer Types
ccle_broad_2019	MM127_SKIN	MM127_SKIN	Mixed Cancer Types
ccle_broad_2019	MM370_SKIN	MM370_SKIN	Mixed Cancer Types
ccle_broad_2019	MM383_SKIN	MM383_SKIN	Mixed Cancer Types
ccle_broad_2019	MM386_SKIN	MM386_SKIN	Mixed Cancer Types
ccle_broad_2019	MM415_SKIN	MM415_SKIN	Mixed Cancer Types
ccle_broad_2019	MM426_SKIN	MM426_SKIN	Mixed Cancer Types
ccle_broad_2019	MTA_HAEMATOPOIETIC_AND_LYMPHOID_TISSUE	MTA_HAEMATOPOIETIC_AND_LYMPHOID_TISSUE	Mixed Cancer Types
ccle_broad_2019	MUGCHOR1_BONE	MUGCHOR1_BONE	Mixed Cancer Types
ccle_broad_2019	MYLA_HAEMATOPOIETIC_AND_LYMPHOID_TISSUE	MYLA_HAEMATOPOIETIC_AND_LYMPHOID_TISSUE	Mixed Cancer Types
ccle_broad_2019	NB1643_AUTONOMIC_GANGLIA	NB1643_AUTONOMIC_GANGLIA	Mixed Cancer Types
ccle_broad_2019	NKL_HAEMATOPOIETIC_AND_LYMPHOID_TISSUE	NKL_HAEMATOPOIETIC_AND_LYMPHOID_TISSUE	Mixed Cancer Types
ccle_broad_2019	OCILY12_HAEMATOPOIETIC_AND_LYMPHOID_TISSUE	OCILY12_HAEMATOPOIETIC_AND_LYMPHOID_TISSUE	Mixed Cancer Types
ccle_broad_2019	OCILY132_HAEMATOPOIETIC_AND_LYMPHOID_TISSUE	OCILY132_HAEMATOPOIETIC_AND_LYMPHOID_TISSUE	Mixed Cancer Types
ccle_broad_2019	PACADD119_PANCREAS	PACADD119_PANCREAS	Mixed Cancer Types
ccle_broad_2019	PACADD135_PANCREAS	PACADD135_PANCREAS	Mixed Cancer Types
ccle_broad_2019	PACADD137_PANCREAS	PACADD137_PANCREAS	Mixed Cancer Types
ccle_broad_2019	PACADD161_PANCREAS	PACADD161_PANCREAS	Mixed Cancer Types
ccle_broad_2019	PACADD165_PANCREAS	PACADD165_PANCREAS	Mixed Cancer Types
ccle_broad_2019	PACADD188_PANCREAS	PACADD188_PANCREAS	Mixed Cancer Types
ccle_broad_2019	PEDS005TPFAD_KIDNEY	PEDS005TPFAD_KIDNEY	Mixed Cancer Types
ccle_broad_2019	PEDS015T_SOFT_TISSUE	PEDS015T_SOFT_TISSUE	Mixed Cancer Types
ccle_broad_2019	CCLFPEDS0008T_SOFT_TISSUE	CCLFPEDS0008T_SOFT_TISSUE	Mixed Cancer Types
ccle_broad_2019	CCLFPEDS0018T_SOFT_TISSUE	CCLFPEDS0018T_SOFT_TISSUE	Mixed Cancer Types
ccle_broad_2019	R262_CENTRAL_NERVOUS_SYSTEM	R262_CENTRAL_NERVOUS_SYSTEM	Mixed Cancer Types
ccle_broad_2019	RH28_SOFT_TISSUE	RH28_SOFT_TISSUE	Mixed Cancer Types
ccle_broad_2019	RH36_SOFT_TISSUE	RH36_SOFT_TISSUE	Mixed Cancer Types
ccle_broad_2019	RH4_SOFT_TISSUE	RH4_SOFT_TISSUE	Mixed Cancer Types
ccle_broad_2019	RHJT_SOFT_TISSUE	RHJT_SOFT_TISSUE	Mixed Cancer Types
ccle_broad_2019	SCLC22H_LUNG	SCLC22H_LUNG	Mixed Cancer Types
ccle_broad_2019	SCMCRM2_SOFT_TISSUE	SCMCRM2_SOFT_TISSUE	Mixed Cancer Types
ccle_broad_2019	SCS214_SOFT_TISSUE	SCS214_SOFT_TISSUE	Mixed Cancer Types
ccle_broad_2019	SEKI_SKIN	SEKI_SKIN	Mixed Cancer Types
ccle_broad_2019	SMZ1_HAEMATOPOIETIC_AND_LYMPHOID_TISSUE	SMZ1_HAEMATOPOIETIC_AND_LYMPHOID_TISSUE	Mixed Cancer Types
ccle_broad_2019	SUM149PT_BREAST	SUM149PT_BREAST	Mixed Cancer Types
ccle_broad_2019	SUM159PT_BREAST	SUM159PT_BREAST	Mixed Cancer Types
ccle_broad_2019	SUM229PE_BREAST	SUM229PE_BREAST	Mixed Cancer Types
ccle_broad_2019	SW626_OVARY	SW626_OVARY	Mixed Cancer Types
ccle_broad_2019	SW954_VULVA	SW954_VULVA	Mixed Cancer Types
ccle_broad_2019	SYO1_SOFT_TISSUE	SYO1_SOFT_TISSUE	Mixed Cancer Types
ccle_broad_2019	TC106_BONE	TC106_BONE	Mixed Cancer Types
ccle_broad_2019	TC138_BONE	TC138_BONE	Mixed Cancer Types
ccle_broad_2019	TC205_BONE	TC205_BONE	Mixed Cancer Types
ccle_broad_2019	TFK1_BILIARY_TRACT	TFK1_BILIARY_TRACT	Mixed Cancer Types
ccle_broad_2019	TTC442_SOFT_TISSUE	TTC442_SOFT_TISSUE	Mixed Cancer Types
ccle_broad_2019	TTC466_BONE	TTC466_BONE	Mixed Cancer Types
ccle_broad_2019	UMCHOR1_BONE	UMCHOR1_BONE	Mixed Cancer Types
ccle_broad_2019	UMUC14_URINARY_TRACT	UMUC14_URINARY_TRACT	Mixed Cancer Types
ccle_broad_2019	UMUC16_URINARY_TRACT	UMUC16_URINARY_TRACT	Mixed Cancer Types
ccle_broad_2019	UMUC5_URINARY_TRACT	UMUC5_URINARY_TRACT	Mixed Cancer Types
ccle_broad_2019	UMUC6_URINARY_TRACT	UMUC6_URINARY_TRACT	Mixed Cancer Types
ccle_broad_2019	UPCISCC152_UPPER_AERODIGESTIVE_TRACT	UPCISCC152_UPPER_AERODIGESTIVE_TRACT	Mixed Cancer Types
ccle_broad_2019	UW228_CENTRAL_NERVOUS_SYSTEM	UW228_CENTRAL_NERVOUS_SYSTEM	Mixed Cancer Types
ccle_broad_2019	Y79_AUTONOMIC_GANGLIA	Y79_AUTONOMIC_GANGLIA	Mixed Cancer Types
ccle_broad_2019	YAMATO_SOFT_TISSUE	YAMATO_SOFT_TISSUE	Mixed Cancer Types
ccle_broad_2019	ACN_AUTONOMIC_GANGLIA	ACN_AUTONOMIC_GANGLIA	Mixed Cancer Types
ccle_broad_2019	CROAP3_HAEMATOPOIETIC_AND_LYMPHOID_TISSUE	CROAP3_HAEMATOPOIETIC_AND_LYMPHOID_TISSUE	Mixed Cancer Types
ccle_broad_2019	HUH6CLONE5_LIVER	HUH6CLONE5_LIVER	Mixed Cancer Types
ccle_broad_2019	MS1_SKIN	MS1_SKIN	Mixed Cancer Types
ccle_broad_2019	NCIH820_LUNG	NCIH820_LUNG	Mixed Cancer Types
ccle_broad_2019	BB30PBL_MATCHED_NORMAL_TISSUE	BB30PBL_MATCHED_NORMAL_TISSUE	Mixed Cancer Types
ccle_broad_2019	BB49EBV_MATCHED_NORMAL_TISSUE	BB49EBV_MATCHED_NORMAL_TISSUE	Mixed Cancer Types
ccle_broad_2019	BB65EBV_MATCHED_NORMAL_TISSUE	BB65EBV_MATCHED_NORMAL_TISSUE	Mixed Cancer Types
ccle_broad_2019	COLO829_MATCHED_NORMAL_TISSUE	COLO829_MATCHED_NORMAL_TISSUE	Mixed Cancer Types
ccle_broad_2019	CP50EBV_MATCHED_NORMAL_TISSUE	CP50EBV_MATCHED_NORMAL_TISSUE	Mixed Cancer Types
ccle_broad_2019	CP66EBV_MATCHED_NORMAL_TISSUE	CP66EBV_MATCHED_NORMAL_TISSUE	Mixed Cancer Types
ccle_broad_2019	HA7EBV_MATCHED_NORMAL_TISSUE	HA7EBV_MATCHED_NORMAL_TISSUE	Mixed Cancer Types
ccle_broad_2019	HCC1143_MATCHED_NORMAL_TISSUE	HCC1143_MATCHED_NORMAL_TISSUE	Mixed Cancer Types
ccle_broad_2019	HCC1187_MATCHED_NORMAL_TISSUE	HCC1187_MATCHED_NORMAL_TISSUE	Mixed Cancer Types
ccle_broad_2019	HCC1395_MATCHED_NORMAL_TISSUE	HCC1395_MATCHED_NORMAL_TISSUE	Mixed Cancer Types
ccle_broad_2019	HCC1599_MATCHED_NORMAL_TISSUE	HCC1599_MATCHED_NORMAL_TISSUE	Mixed Cancer Types
ccle_broad_2019	HCC1937_MATCHED_NORMAL_TISSUE	HCC1937_MATCHED_NORMAL_TISSUE	Mixed Cancer Types
ccle_broad_2019	HCC1954_MATCHED_NORMAL_TISSUE	HCC1954_MATCHED_NORMAL_TISSUE	Mixed Cancer Types
ccle_broad_2019	HCC2157_MATCHED_NORMAL_TISSUE	HCC2157_MATCHED_NORMAL_TISSUE	Mixed Cancer Types
ccle_broad_2019	HCC2218_MATCHED_NORMAL_TISSUE	HCC2218_MATCHED_NORMAL_TISSUE	Mixed Cancer Types
ccle_broad_2019	HCC38_MATCHED_NORMAL_TISSUE	HCC38_MATCHED_NORMAL_TISSUE	Mixed Cancer Types
ccle_broad_2019	HCET_UPPER_AERODIGESTIVE_TRACT	HCET_UPPER_AERODIGESTIVE_TRACT	Mixed Cancer Types
ccle_broad_2019	J82_MATCHED_NORMAL_TISSUE	J82_MATCHED_NORMAL_TISSUE	Mixed Cancer Types
ccle_broad_2019	JHU028_LUNG	JHU028_LUNG	Mixed Cancer Types
ccle_broad_2019	L542_MATCHED_NORMAL_TISSUE	L542_MATCHED_NORMAL_TISSUE	Mixed Cancer Types
ccle_broad_2019	LB1047EBV_MATCHED_NORMAL_TISSUE	LB1047EBV_MATCHED_NORMAL_TISSUE	Mixed Cancer Types
ccle_broad_2019	LB2241EBV_MATCHED_NORMAL_TISSUE	LB2241EBV_MATCHED_NORMAL_TISSUE	Mixed Cancer Types
ccle_broad_2019	LB2518EBV_MATCHED_NORMAL_TISSUE	LB2518EBV_MATCHED_NORMAL_TISSUE	Mixed Cancer Types
ccle_broad_2019	LB373EBV_MATCHED_NORMAL_TISSUE	LB373EBV_MATCHED_NORMAL_TISSUE	Mixed Cancer Types
ccle_broad_2019	LB647PBL_MATCHED_NORMAL_TISSUE	LB647PBL_MATCHED_NORMAL_TISSUE	Mixed Cancer Types
ccle_broad_2019	LB771PBL_MATCHED_NORMAL_TISSUE	LB771PBL_MATCHED_NORMAL_TISSUE	Mixed Cancer Types
ccle_broad_2019	LB831EBV_MATCHED_NORMAL_TISSUE	LB831EBV_MATCHED_NORMAL_TISSUE	Mixed Cancer Types
ccle_broad_2019	LB996EBV_MATCHED_NORMAL_TISSUE	LB996EBV_MATCHED_NORMAL_TISSUE	Mixed Cancer Types
ccle_broad_2019	LS1034_MATCHED_NORMAL_TISSUE	LS1034_MATCHED_NORMAL_TISSUE	Mixed Cancer Types
ccle_broad_2019	M00921_SKIN	M00921_SKIN	Mixed Cancer Types
ccle_broad_2019	M1203273_SKIN	M1203273_SKIN	Mixed Cancer Types
ccle_broad_2019	M980513_SKIN	M980513_SKIN	Mixed Cancer Types
ccle_broad_2019	MET2B	MET2B	Mixed Cancer Types
ccle_broad_2019	MZ1B_MATCHED_NORMAL_TISSUE	MZ1B_MATCHED_NORMAL_TISSUE	Mixed Cancer Types
ccle_broad_2019	MZ7B_MATCHED_NORMAL_TISSUE	MZ7B_MATCHED_NORMAL_TISSUE	Mixed Cancer Types
ccle_broad_2019	NCIBL128_MATCHED_NORMAL_TISSUE	NCIBL128_MATCHED_NORMAL_TISSUE	Mixed Cancer Types
ccle_broad_2019	NCIBL1395_MATCHED_NORMAL_TISSUE	NCIBL1395_MATCHED_NORMAL_TISSUE	Mixed Cancer Types
ccle_broad_2019	NCIBL1437_MATCHED_NORMAL_TISSUE	NCIBL1437_MATCHED_NORMAL_TISSUE	Mixed Cancer Types
ccle_broad_2019	NCIBL1770_MATCHED_NORMAL_TISSUE	NCIBL1770_MATCHED_NORMAL_TISSUE	Mixed Cancer Types
ccle_broad_2019	NCIBL2009_MATCHED_NORMAL_TISSUE	NCIBL2009_MATCHED_NORMAL_TISSUE	Mixed Cancer Types
ccle_broad_2019	NCIBL2052_MATCHED_NORMAL_TISSUE	NCIBL2052_MATCHED_NORMAL_TISSUE	Mixed Cancer Types
ccle_broad_2019	NCIBL2087_MATCHED_NORMAL_TISSUE	NCIBL2087_MATCHED_NORMAL_TISSUE	Mixed Cancer Types
ccle_broad_2019	NCIBL209_MATCHED_NORMAL_TISSUE	NCIBL209_MATCHED_NORMAL_TISSUE	Mixed Cancer Types
ccle_broad_2019	NCIBL2122_MATCHED_NORMAL_TISSUE	NCIBL2122_MATCHED_NORMAL_TISSUE	Mixed Cancer Types
ccle_broad_2019	NCIBL2126_MATCHED_NORMAL_TISSUE	NCIBL2126_MATCHED_NORMAL_TISSUE	Mixed Cancer Types
ccle_broad_2019	NCIBL2171_MATCHED_NORMAL_TISSUE	NCIBL2171_MATCHED_NORMAL_TISSUE	Mixed Cancer Types
ccle_broad_2019	SCI1_HAEMATOPOIETIC_AND_LYMPHOID_TISSUE	SCI1_HAEMATOPOIETIC_AND_LYMPHOID_TISSUE	Mixed Cancer Types

## Sheet: 502 CCLE with UGT mutations
Study of Origin	UGT gene	Sample ID	Cancer Type	Cancer Type Detailed	Protein Change	Annotation	Functional Impact	Mutation Type	Variant Type	Copy #	COSMIC	MS	VS	Center	Chromosome	Start Pos	End Pos	Ref	Var	HGVSg	HGVSc	Allele Freq (T)	Allele Freq (N)	Variant Reads	Ref Reads	Variant Reads (Normal)	Ref Reads (Normal)	# Mut in Sample	Exon	gnomAD	ClinVar	dbSNP	SIGNAL	Age	Annotation Source	Cell Line Source	Characteristics	DepMap ID	Disease Ontology	Doubling Time (hrs)	Doubling Time From Vendor	Ethnicity Category	Fraction Genome Altered	Freezing Medium	Genome Doublings	Geographic Distribution	Growth Medium	Histology	Hist Subtype 1
Cancer Cell Line Encyclopedia (Broad, 2019)	1A E2-5	SNU1040_LARGE_INTESTINE	Colorectal Cancer	Colorectal Adenocarcinoma	R441H	OncoKB: NA;CIViC: NA;MyCancerGenome: not present;CancerHotspot: no;3DHotspot: no	SIFT: impact: tolerated, score: 0.06;Polyphen-2: impact: benign, score: 0.127	Missense_Mutation	SNP	Diploid	1	NA	NA	NA	2	234680928	234680928	G	A	2:g.234680928G>A	ENST00000305139.6:c.1322G>A							19141	44686					34	CCLE	KCLB	epithelial; monolayer	ACH-000999			63 hrs	Asian	0.06		0		RPMI 1640 with L-glutamine (300mg/L), 90%; heat inactivated fetal bovine serum (FBS),10%	Carcinoma	NS
Cancer Cell Line Encyclopedia (Broad, 2019)	1A4	22RV1_PROSTATE	Prostate Cancer	Prostate Adenocarcinoma	A115T	OncoKB: NA;CIViC: NA;MyCancerGenome: not present;CancerHotspot: no;3DHotspot: no	SIFT: NA;Polyphen-2: NA	Missense_Mutation	SNP			NA	NA	NA	2	234627809	234627809	G	A	2:g.234627809G>A	ENST00000373409.3:c.343G>A							2186	44682						CCLE	ATCC	Adherent epithelial	ACH-000956	prostate_cancer	58.4		Caucasian	0.2002	5%DMSO	0		RPMI-1640+10% FBS	Carcinoma	NS
Cancer Cell Line Encyclopedia (Broad, 2019)	1A4	2313287_STOMACH	Esophagogastric Cancer	Esophageal Squamous Cell Carcinoma	W173Gfs*8	OncoKB: NA;CIViC: NA;MyCancerGenome: not present;CancerHotspot: no;3DHotspot: no	SIFT: NA;Polyphen-2: NA	Frame_Shift_Del	DEL		2	NA	NA	NA	2	234627977	234627977	T	-	2:g.234627977del	ENST00000373409.3:c.517del							2272	44682					72	CCLE	DSMZ	aderent epithelial cells growing as confluent monolayers	ACH-000948		97.6	50 hrs	Caucasian	0.1029	10%DMSO	0		90%RPMI 1640+10% h.i FBS	Carcinoma	adenocarcinoma
Cancer Cell Line Encyclopedia (Broad, 2019)	2A E2-6	451LU_SKIN	Cancer of Unknown Primary	Cancer of Unknown Primary	I501F	OncoKB: NA;CIViC: NA;MyCancerGenome: not present;CancerHotspot: no;3DHotspot: no	SIFT: NA;Polyphen-2: NA	Missense_Mutation	DNP			NA	NA	NA	4	70455200	70455201	TT	AA	4:g.70455200_70455201delinsAA	ENST00000457664.2:c.1500_1501inv							468	44718									ACH-001002
Cancer Cell Line Encyclopedia (Broad, 2019)	1A E2-5	59M_OVARY	Ovarian Cancer	Ovarian Carcinosarcoma/Malignant Mixed Mesodermal Tumor	P391S	OncoKB: NA;CIViC: NA;MyCancerGenome: not present;CancerHotspot: no;3DHotspot: no	SIFT: impact: deleterious, score: 0;Polyphen-2: impact: probably_damaging, score: 1	Missense_Mutation	SNP			NA	NA	NA	2	234676955	234676955	C	T	2:g.234676955C>T	ENST00000305139.6:c.1171C>T							228	44685		Uncertain_significance				CCLE	ECACC		ACH-000520	ovarian_carcinoma			Caucasian	0.6144		1			Carcinoma	NS
Cancer Cell Line Encyclopedia (Broad, 2019)	2A1	639V_URINARY_TRACT	Bladder Cancer	Bladder Urothelial Carcinoma	T17A	OncoKB: NA;CIViC: NA;MyCancerGenome: not present;CancerHotspot: no;3DHotspot: no	SIFT: impact: tolerated, score: 0.5;Polyphen-2: impact: benign, score: 0.005	Missense_Mutation	SNP			NA	NA	NA	4	70513314	70513314	T	C	4:g.70513314T>C	ENST00000503640.1:c.49A>G							2114	44713					69	CCLE	ATCC	Adherent epithelial monolayer	ACH-000973		35.8		Caucasian	0.5058	10%DMSO	0		DMEM + 10% FBS	Carcinoma	transitional_cell_carcinoma
Cancer Cell Line Encyclopedia (Broad, 2019)	2B15	647V_URINARY_TRACT	Bladder Cancer	Bladder Urothelial Carcinoma	D122Y	OncoKB: NA;CIViC: NA;MyCancerGenome: not present;CancerHotspot: no;3DHotspot: no	SIFT: impact: deleterious, score: 0.03;Polyphen-2: impact: benign, score: 0.033	Missense_Mutation	SNP			NA	NA	NA	4	69535973	69535973	C	A	4:g.69535973C>A	ENST00000338206.5:c.364G>T							465	44713						CCLE	DSMZ	Adherent	ACH-000896		92.4		Caucasian	0.8615	10% DMSO	1		DMEM +15%FBS	Carcinoma	transitional_cell_carcinoma
Cancer Cell Line Encyclopedia (Broad, 2019)	2B10	8MGBA_CENTRAL_NERVOUS_SYSTEM	Glioma	Glioblastoma Multiforme	V273A	OncoKB: NA;CIViC: NA;MyCancerGenome: not present;CancerHotspot: no;3DHotspot: no	SIFT: impact: deleterious, score: 0;Polyphen-2: impact: benign, score: 0.043	Missense_Mutation	SNP			NA	NA	NA	4	69683846	69683846	T	C	4:g.69683846T>C	ENST00000265403.7:c.818T>C							216	44714					54	CCLE	DSMZ	Adherent	ACH-000137		43		Caucasian	0.3002	5% DMSO	1		EMEM + 20% FBS	Glioma	astrocytoma_Grade_IV
Cancer Cell Line Encyclopedia (Broad, 2019)	1A3	A101D_SKIN	Melanoma	Cutaneous Melanoma	R49Q	OncoKB: NA;CIViC: NA;MyCancerGenome: not present;CancerHotspot: no;3DHotspot: no	SIFT: NA;Polyphen-2: NA	Missense_Mutation	SNP	Diploid		NA	NA	NA	2	234637918	234637918	G	A	2:g.234637918G>A	ENST00000482026.1:c.146G>A							253	44682					56	CCLE	GNF		ACH-000008		69.1		Caucasian	0.7564		1			Malignant_Melanoma	NS
Cancer Cell Line Encyclopedia (Broad, 2019)	3A2	A2058_SKIN	Melanoma	Cutaneous Melanoma	P389S	OncoKB: NA;CIViC: NA;MyCancerGenome: not present;CancerHotspot: no;3DHotspot: no	SIFT: impact: deleterious, score: 0.04;Polyphen-2: impact: probably_damaging, score: 0.998	Missense_Mutation	SNP	Diploid	1	NA	NA	NA	5	36038029	36038029	G	A	5:g.36038029G>A	ENST00000282507.3:c.1165C>T							556	44748					43	CCLE	GNF		ACH-000788	melanoma			Caucasian	0.2263		0			Malignant_Melanoma	NS
Cancer Cell Line Encyclopedia (Broad, 2019)	2B7	ACCMESO1_PLEURA	Mesothelioma	Pleural Mesothelioma, Epithelioid Type	V147I	OncoKB: NA;CIViC: NA;MyCancerGenome: not present;CancerHotspot: no;3DHotspot: no	SIFT: impact: tolerated, score: 0.19;Polyphen-2: impact: benign, score: 0.076	Missense_Mutation	SNP	Diploid		NA	NA	NA	4	69962677	69962677	G	A	4:g.69962677G>A	ENST00000305231.7:c.439G>A							174	44713	4.25662e-05		rs760454742			CCLE	RIKEN	fibroblast-like	ACH-000086				Asian	0.3978		0		RPMI 1640 +10% FBS	Mesothelioma	NS
Cancer Cell Line Encyclopedia (Broad, 2019)	1A8	AGS_STOMACH	Esophagogastric Cancer	Esophageal Squamous Cell Carcinoma	Q236H	OncoKB: NA;CIViC: NA;MyCancerGenome: not present;CancerHotspot: no;3DHotspot: no	SIFT: impact: tolerated, score: 0.15;Polyphen-2: impact: probably_damaging, score: 0.948	Missense_Mutation	SNP	Diploid		NA	NA	NA	2	234527061	234527061	A	C	2:g.234527061A>C	ENST00000373450.4:c.708A>C							816	44682					54	CCLE	NIBRI		ACH-000880				Caucasian	0.1557		0			Carcinoma	adenocarcinoma
Cancer Cell Line Encyclopedia (Broad, 2019)	2B15	AMO1_HAEMATOPOIETIC_AND_LYMPHOID_TISSUE	Mature B-Cell Neoplasms	Plasma Cell Myeloma	L272V	OncoKB: NA;CIViC: NA;MyCancerGenome: not present;CancerHotspot: no;3DHotspot: no	SIFT: impact: deleterious, score: 0.01;Polyphen-2: impact: possibly_damaging, score: 0.85	Missense_Mutation	SNP	Diploid		NA	NA	NA	4	69533817	69533817	A	C	4:g.69533817A>C	ENST00000338206.5:c.814T>G							443	44714					64	CCLE	DSMZ	single suspension	ACH-000838	multiple_myeloma	57.8	50-90hrs	Asian	0.5545	5% DMSO	0		RPMI-1640+20% FBS	Lymphoid_Neoplasm	plasma_cell_myeloma
Cancer Cell Line Encyclopedia (Broad, 2019)	3A1	AN3CA_ENDOMETRIUM	Endometrial Cancer	Endometrial Carcinoma	H381R	OncoKB: NA;CIViC: NA;MyCancerGenome: not present;CancerHotspot: no;3DHotspot: no	SIFT: impact: deleterious, score: 0;Polyphen-2: impact: possibly_damaging, score: 0.868	Missense_Mutation	SNP	Diploid		NA	NA	NA	5	35955900	35955900	T	C	5:g.35955900T>C	ENST00000274278.3:c.1142A>G							2450	44748					55	CCLE	ATCC	Adherent epithelial	ACH-000940		88.9		Caucasian	0.2287	5% DMSO	0		EMEM + 10% FBS	Carcinoma	adenocarcinoma
Cancer Cell Line Encyclopedia (Broad, 2019)	2B17	ASPC1_PANCREAS	Pancreatic Cancer	Pancreatic Adenocarcinoma	R269C	OncoKB: NA;CIViC: NA;MyCancerGenome: not present;CancerHotspot: no;3DHotspot: no	SIFT: impact: deleterious, score: 0.03;Polyphen-2: impact: benign, score: 0.277	Missense_Mutation	SNP	Diploid		NA	NA	NA	4	69431358	69431358	G	A	4:g.69431358G>A	ENST00000317746.2:c.805C>T							225	44714					62	CCLE	ATCC	Adherent	ACH-000222	pancreatic_cancer	171.5		Caucasian	0.9761	5%DMSO	1		RPMI-1640 10% FBS +1 mM Sodium pyruvate	Carcinoma	ductal_carcinoma
Cancer Cell Line Encyclopedia (Broad, 2019)	2B7	AU565_BREAST	Breast Cancer	Invasive Breast Carcinoma	Q330*	OncoKB: NA;CIViC: NA;MyCancerGenome: not present;CancerHotspot: no;3DHotspot: no	SIFT: NA;Polyphen-2: NA	Nonsense_Mutation	SNP	Diploid		NA	NA	NA	4	69968642	69968642	C	T	4:g.69968642C>T	ENST00000305231.7:c.988C>T							559	44715					43	CCLE	ATCC	Adherenet	ACH-000248	breast_cancer	74.1		Caucasian	0.708	5% DMSO	1		RPMI 1640 + 10%FBS	Carcinoma	NS
Cancer Cell Line Encyclopedia (Broad, 2019)	2B7	BB49HNC_UPPER_AERODIGESTIVE_TRACT	Cancer of Unknown Primary	Cancer of Unknown Primary	P366T	OncoKB: NA;CIViC: NA;MyCancerGenome: not present;CancerHotspot: no;3DHotspot: no	SIFT: impact: deleterious, score: 0.01;Polyphen-2: impact: benign, score: 0.431	Missense_Mutation	SNP		5	NA	NA	NA	4	69973826	69973826	C	A	4:g.69973826C>A	ENST00000305231.7:c.1096C>A							242	44717									ACH-002213
Cancer Cell Line Encyclopedia (Broad, 2019)	1A6	BE13_HAEMATOPOIETIC_AND_LYMPHOID_TISSUE	Cancer of Unknown Primary	Cancer of Unknown Primary	P81R	OncoKB: NA;CIViC: NA;MyCancerGenome: not present;CancerHotspot: no;3DHotspot: no	SIFT: impact: deleterious, score: 0;Polyphen-2: impact: possibly_damaging, score: 0.809	Missense_Mutation	SNP			NA	NA	NA	2	234601892	234601892	C	G	2:g.234601892C>G	ENST00000305139.6:c.242C>G							348	44682									ACH-002216
Cancer Cell Line Encyclopedia (Broad, 2019)	2B11	BE2M17_AUTONOMIC_GANGLIA	Cancer of Unknown Primary	Cancer of Unknown Primary	A325E	OncoKB: NA;CIViC: NA;MyCancerGenome: not present;CancerHotspot: no;3DHotspot: no	SIFT: impact: deleterious, score: 0;Polyphen-2: impact: probably_damaging, score: 0.996	Missense_Mutation	SNP			NA	NA	NA	4	70074097	70074097	G	T	4:g.70074097G>T	ENST00000446444.1:c.974C>A							306	44715									ACH-002217
Cancer Cell Line Encyclopedia (Broad, 2019)	3A1	BFTC905_URINARY_TRACT	Bladder Cancer	Bladder Urothelial Carcinoma	X32_splice	OncoKB: NA;CIViC: NA;MyCancerGenome: not present;CancerHotspot: no;3DHotspot: no	SIFT: NA;Polyphen-2: NA	Splice_Site	SNP	Diploid		NA	NA	NA	5	35988655	35988655	T	A	5:g.35988655T>A	ENST00000274278.3:c.95-2A>T							351						51	CCLE	DSMZ	Adherent	ACH-000802		38.3		Asian	0.6205	5%DMSO	1	chinese	DMEM + 10%FBS	Carcinoma	transitional_cell_carcinoma
Cancer Cell Line Encyclopedia (Broad, 2019)	2B28	BL70_HAEMATOPOIETIC_AND_LYMPHOID_TISSUE	Mature B-Cell Neoplasms	Burkitt Lymphoma	E440*	OncoKB: NA;CIViC: NA;MyCancerGenome: not present;CancerHotspot: no;3DHotspot: no	SIFT: NA;Polyphen-2: NA	Nonsense_Mutation	SNP	Diploid		NA	NA	NA	4	70160255	70160255	G	T	4:g.70160255G>T	ENST00000335568.5:c.1318G>T							227	44718					16	CCLE	NIBRI		ACH-000402				Caucasian	0.1029		0			Lymphoid_Neoplasm	Burkitt_lymphoma
Cancer Cell Line Encyclopedia (Broad, 2019)	2A E2-6	BT12_SOFT_TISSUE	Cancer of Unknown Primary	Cancer of Unknown Primary	G530E	OncoKB: NA;CIViC: NA;MyCancerGenome: not present;CancerHotspot: no;3DHotspot: no	SIFT: impact: tolerated, score: 0.27;Polyphen-2: impact: possibly_damaging, score: 0.53	Missense_Mutation	SNP			NA	NA	NA	4	70455112	70455112	C	T	4:g.70455112C>T	ENST00000457664.2:c.1589G>A							192	44718									ACH-000160
Cancer Cell Line Encyclopedia (Broad, 2019)	1A4	BT474_BREAST	Breast Cancer	Invasive Breast Carcinoma	E237K	OncoKB: NA;CIViC: NA;MyCancerGenome: not present;CancerHotspot: no;3DHotspot: no	SIFT: NA;Polyphen-2: NA	Missense_Mutation	SNP	Diploid		NA	NA	NA	2	234628175	234628175	G	A	2:g.234628175G>A	ENST00000373409.3:c.709G>A							1019	44682					60	CCLE	NIBRI		ACH-000927	breast_cancer			Caucasian	0.6866		1			Carcinoma	ductal_carcinoma
Cancer Cell Line Encyclopedia (Broad, 2019)	1A4	BT483_BREAST	Breast Cancer	Invasive Breast Carcinoma	T62N	OncoKB: NA;CIViC: NA;MyCancerGenome: not present;CancerHotspot: no;3DHotspot: no	SIFT: NA;Polyphen-2: NA	Missense_Mutation	SNP	Diploid		NA	NA	NA	2	234627651	234627651	C	A	2:g.234627651C>A	ENST00000373409.3:c.185C>A							538	44682					23	CCLE	ATCC	Adherent epithelial	ACH-000818	breast_cancer	206.3		Caucasian	0.6357	5%DMSO	0		RPMI-1640 + 20% FBS	Carcinoma	ductal_carcinoma
Cancer Cell Line Encyclopedia (Broad, 2019)	2B7	BV173_HAEMATOPOIETIC_AND_LYMPHOID_TISSUE	Blood Cancer	Chronic Myelogenous Leukemia	R96G	OncoKB: NA;CIViC: NA;MyCancerGenome: not present;CancerHotspot: no;3DHotspot: no	SIFT: impact: tolerated, score: 0.47;Polyphen-2: impact: benign, score: 0.007	Missense_Mutation	SNP	Diploid		NA	NA	NA	4	69962524	69962524	A	G	4:g.69962524A>G	ENST00000305231.7:c.286A>G							358	44713			rs1421204795		45	CCLE	DSMZ	SUSPENSION ( small round cells, slow to grow)	ACH-000432		100.6		Caucasian	0.1168	10% DMSO	0		RPMI-1640+20% FBS	Haematopoietic_Neoplasm	blast_phase_chronic_myeloid_leukaemia
Cancer Cell Line Encyclopedia (Broad, 2019)	2B10	C32_SKIN	Melanoma	Cutaneous Melanoma	L62I	OncoKB: NA;CIViC: NA;MyCancerGenome: not present;CancerHotspot: no;3DHotspot: no	SIFT: impact: tolerated, score: 0.15;Polyphen-2: impact: benign, score: 0.046	Missense_Mutation	SNP		3	NA	NA	NA	4	69681921	69681921	C	A	4:g.69681921C>A	ENST00000265403.7:c.184C>A							280	44713					53	CCLE	ATCC	ADHERENT	ACH-000580		59		Caucasian	0.2018	5% DMSO	0		EMEM+10%FBS	Malignant_Melanoma	NS
Cancer Cell Line Encyclopedia (Broad, 2019)	3A2	C3A_LIVER	Hepatobiliary Cancer	Hepatocellular Carcinoma	Q4E	OncoKB: NA;CIViC: NA;MyCancerGenome: not present;CancerHotspot: no;3DHotspot: no	SIFT: impact: tolerated, score: 0.25;Polyphen-2: impact: possibly_damaging, score: 0.857	Missense_Mutation	SNP	Diploid	1	NA	NA	NA	5	36066882	36066882	G	C	5:g.36066882G>C	ENST00000282507.3:c.10C>G							293	44743					15	CCLE			ACH-001021				Caucasian	0.4165		0			Carcinoma	hepatocellular_carcinoma
Cancer Cell Line Encyclopedia (Broad, 2019)	2B11	C4I_CERVIX	Cancer of Unknown Primary	Cancer of Unknown Primary	F154S	OncoKB: NA;CIViC: NA;MyCancerGenome: not present;CancerHotspot: no;3DHotspot: no	SIFT: impact: tolerated, score: 0.51;Polyphen-2: impact: benign, score: 0.009	Missense_Mutation	SNP			NA	NA	NA	4	70079980	70079980	A	G	4:g.70079980A>G	ENST00000446444.1:c.461T>C							235	44713									ACH-001334
Cancer Cell Line Encyclopedia (Broad, 2019)	2B17	C75_LARGE_INTESTINE	Mixed Cancer Types	Mixed Cancer Types	L189V	OncoKB: NA;CIViC: NA;MyCancerGenome: not present;CancerHotspot: no;3DHotspot: no	SIFT: impact: tolerated, score: 0.23;Polyphen-2: impact: benign, score: 0.04	Missense_Mutation	SNP			NA	NA	NA	4	69433638	69433638	G	C	4:g.69433638G>C	ENST00000317746.2:c.565C>G							250	44713
Cancer Cell Line Encyclopedia (Broad, 2019)	2B15	C8166_HAEMATOPOIETIC_AND_LYMPHOID_TISSUE	Cancer of Unknown Primary	Cancer of Unknown Primary	C16Y	OncoKB: NA;CIViC: NA;MyCancerGenome: not present;CancerHotspot: no;3DHotspot: no	SIFT: impact: deleterious, score: 0.03;Polyphen-2: impact: benign, score: 0.013	Missense_Mutation	SNP			NA	NA	NA	4	69536290	69536290	C	T	4:g.69536290C>T	ENST00000338206.5:c.47G>A							240	44713	4.1991e-06		rs1396369958						ACH-000206
Cancer Cell Line Encyclopedia (Broad, 2019)	2A E2-6	CA922_UPPER_AERODIGESTIVE_TRACT	Cancer of Unknown Primary	Cancer of Unknown Primary	C507G	OncoKB: NA;CIViC: NA;MyCancerGenome: not present;CancerHotspot: no;3DHotspot: no	SIFT: impact: deleterious, score: 0.02;Polyphen-2: impact: probably_damaging, score: 0.999	Missense_Mutation	SNP			NA	NA	NA	4	70455182	70455182	A	C	4:g.70455182A>C	ENST00000457664.2:c.1519T>G							378	44718									ACH-002043
Cancer Cell Line Encyclopedia (Broad, 2019)	2B10	CAL148_BREAST	Breast Cancer	Invasive Breast Carcinoma	D528N	OncoKB: NA;CIViC: NA;MyCancerGenome: not present;CancerHotspot: no;3DHotspot: no	SIFT: impact: deleterious, score: 0.03;Polyphen-2: impact: benign, score: 0.026	Missense_Mutation	SNP			NA	NA	NA	4	69696592	69696592	G	A	4:g.69696592G>A	ENST00000265403.7:c.1582G>A							577	44718					58	CCLE	DSMZ	Epitheloid cells as single cells or as clumps in suspension and monolayer	ACH-000902	breast_cancer	60	30-40hrs	Caucasian	0.2155		0	france	DMEM+20%FBS	Carcinoma	ductal_carcinoma
Cancer Cell Line Encyclopedia (Broad, 2019)	2A E2-6	CAL27_UPPER_AERODIGESTIVE_TRACT	Esophagogastric Cancer	Esophageal Poorly Differentiated Carcinoma	S453*	OncoKB: NA;CIViC: NA;MyCancerGenome: not present;CancerHotspot: no;3DHotspot: no	SIFT: NA;Polyphen-2: NA	Nonsense_Mutation	SNP	DeepDel		NA	NA	NA	4	70455343	70455343	G	C	4:g.70455343G>C	ENST00000457664.2:c.1358C>G							420	44718					56	CCLE	NIBRI		ACH-000832		29.3		Caucasian	0.319		0			Carcinoma	squamous_cell_carcinoma
Cancer Cell Line Encyclopedia (Broad, 2019)	2B11	CAL51_BREAST	Breast Cancer	Invasive Breast Carcinoma	T244S	OncoKB: NA;CIViC: NA;MyCancerGenome: not present;CancerHotspot: no;3DHotspot: no	SIFT: impact: deleterious, score: 0.01;Polyphen-2: impact: benign, score: 0.285	Missense_Mutation	SNP	Diploid		NA	NA	NA	4	70078430	70078430	G	C	4:g.70078430G>C	ENST00000446444.1:c.731C>G							822	44714					45	CCLE	DSMZ	epithelial-like adherent cells growing in monolayers; the culture contains usually a large amount of cell debris	ACH-000856	breast_cancer	26.8	>60 hrs	Caucasian	0.033	10%DMSO	0		80% Dulbecco's MEM(4.5g/L glucose) +20% h.i.FBS	Carcinoma	NS
Cancer Cell Line Encyclopedia (Broad, 2019)	3A1	CAL54_KIDNEY	Kidney Cancer	Renal Cell Carcinoma	N264K	OncoKB: NA;CIViC: NA;MyCancerGenome: not present;CancerHotspot: no;3DHotspot: no	SIFT: impact: deleterious, score: 0.01;Polyphen-2: impact: probably_damaging, score: 0.955	Missense_Mutation	SNP	Diploid		NA	NA	NA	5	35965539	35965539	G	T	5:g.35965539G>T	ENST00000274278.3:c.792C>A							216	44746					75	CCLE	DSMZ	epitheloid, adherent cells growing in monolayers	ACH-000457			~ 72 hrs	Caucasian	0.5861	10%DMSO	1		85% Dulbecco's MEM +15% h.i.FBS	Carcinoma	renal_cell_carcinoma
Cancer Cell Line Encyclopedia (Broad, 2019)	1A1	CAL72_BONE	Cancer of Unknown Primary	Cancer of Unknown Primary	H55Y	OncoKB: NA;CIViC: NA;MyCancerGenome: not present;CancerHotspot: no;3DHotspot: no	SIFT: NA;Polyphen-2: NA	Missense_Mutation	SNP			NA	NA	NA	2	234669096	234669096	C	T	2:g.234669096C>T	ENST00000305208.5:c.163C>T							295	44682	3.18512e-05		rs1218272105						ACH-001715
Cancer Cell Line Encyclopedia (Broad, 2019)	3A1	CAL851_BREAST	Breast Cancer	Invasive Breast Carcinoma	H317N	OncoKB: NA;CIViC: NA;MyCancerGenome: not present;CancerHotspot: no;3DHotspot: no	SIFT: impact: tolerated, score: 1;Polyphen-2: impact: benign, score: 0	Missense_Mutation	SNP	Amp		NA	NA	NA	5	35957416	35957416	G	T	5:g.35957416G>T	ENST00000274278.3:c.949C>A							216	44747					35	CCLE	DSMZ		ACH-000857	breast_cancer	58.4		Caucasian	0.7438	5% DMSO	1		DMEM+10% FBS	Carcinoma	NS
Cancer Cell Line Encyclopedia (Broad, 2019)	1A10	CAMA1_BREAST	Breast Cancer	Invasive Breast Carcinoma	F146L	OncoKB: NA;CIViC: NA;MyCancerGenome: not present;CancerHotspot: no;3DHotspot: no	SIFT: impact: tolerated, score: 1;Polyphen-2: impact: possibly_damaging, score: 0.557	Missense_Mutation	SNP	Diploid		NA	NA	NA	2	234545606	234545606	T	G	2:g.234545606T>G	ENST00000344644.5:c.438T>G							453	44682	5.57214e-05		rs377128796		51	CCLE	ATCC	Adherent epithelial	ACH-000783	breast_cancer	114.8		Caucasian	0.5173	5%DMSO	0		EMEM+10%FBS	Carcinoma	NS
Cancer Cell Line Encyclopedia (Broad, 2019)	1A9	CAPAN1_PANCREAS	Pancreatic Cancer	Pancreatic Adenocarcinoma	L173R	OncoKB: NA;CIViC: NA;MyCancerGenome: not present;CancerHotspot: no;3DHotspot: no	SIFT: NA;Polyphen-2: NA	Missense_Mutation	SNP	Diploid		NA	NA	NA	2	234581098	234581098	T	G	2:g.234581098T>G	ENST00000354728.4:c.518T>G							263	44682					40	CCLE	ATCC	Adherent	ACH-000354		148.4		Caucasian	0.6836	5%DMSO	1		IMDM +20% FBS	Carcinoma	ductal_carcinoma
Cancer Cell Line Encyclopedia (Broad, 2019)	2B28	CCLFPEDS0008T_SOFT_TISSUE	Mixed Cancer Types	Mixed Cancer Types	G348C	OncoKB: NA;CIViC: NA;MyCancerGenome: not present;CancerHotspot: no;3DHotspot: no	SIFT: impact: deleterious, score: 0;Polyphen-2: impact: probably_damaging, score: 0.998	Missense_Mutation	SNP			NA	NA	NA	4	70155422	70155422	G	T	4:g.70155422G>T	ENST00000335568.5:c.1042G>T							212	44716
Cancer Cell Line Encyclopedia (Broad, 2019)	2B15	CHAGOK1_LUNG	Non-Small Cell Lung Cancer	Non-Small Cell Lung Cancer	L133F	OncoKB: NA;CIViC: NA;MyCancerGenome: not present;CancerHotspot: no;3DHotspot: no	SIFT: impact: tolerated, score: 0.72;Polyphen-2: impact: benign, score: 0.007	Missense_Mutation	SNP	Amp		NA	NA	NA	4	69535938	69535938	C	G	4:g.69535938C>G	ENST00000338206.5:c.399G>C							669	44713					45	CCLE	ECACC		ACH-000867				Caucasian	0.487		1			Carcinoma	NS
Cancer Cell Line Encyclopedia (Broad, 2019)	1A10	CHL1_SKIN	Melanoma	Cutaneous Melanoma	G171R	OncoKB: NA;CIViC: NA;MyCancerGenome: not present;CancerHotspot: no;3DHotspot: no	SIFT: impact: deleterious, score: 0.03;Polyphen-2: impact: benign, score: 0.292	Missense_Mutation	SNP	Diploid		NA	NA	NA	2	234545679	234545679	G	A	2:g.234545679G>A	ENST00000344644.5:c.511G>A							826	44682	3.98124e-06		rs1281264181			CCLE	ATCC	Epithelial Adherent	ACH-001024		48.7		Caucasian	0.4634	5%DMSO	1		RPMI1640+15%FBS	Malignant_Melanoma	NS
Cancer Cell Line Encyclopedia (Broad, 2019)	2B15	CHLA32_BONE	Mixed Cancer Types	Mixed Cancer Types	E441*	OncoKB: NA;CIViC: NA;MyCancerGenome: not present;CancerHotspot: no;3DHotspot: no	SIFT: NA;Polyphen-2: NA	Nonsense_Mutation	SNP			NA	NA	NA	4	69513094	69513094	C	A	4:g.69513094C>A	ENST00000338206.5:c.1321G>T							161	44718	1.42366e-05		rs755611274
Cancer Cell Line Encyclopedia (Broad, 2019)	1A9	CHLA9_BONE	Mixed Cancer Types	Mixed Cancer Types	G273S	OncoKB: NA;CIViC: NA;MyCancerGenome: not present;CancerHotspot: no;3DHotspot: no	SIFT: NA;Polyphen-2: NA	Missense_Mutation	SNP			NA	NA	NA	2	234581397	234581397	G	A	2:g.234581397G>A	ENST00000354728.4:c.817G>A							131	44682
Cancer Cell Line Encyclopedia (Broad, 2019)	2A3	CL14_LARGE_INTESTINE	Colorectal Cancer	Colorectal Adenocarcinoma	T417S	OncoKB: NA;CIViC: NA;MyCancerGenome: not present;CancerHotspot: no;3DHotspot: no	SIFT: impact: deleterious, score: 0.02;Polyphen-2: impact: benign, score: 0.054	Missense_Mutation	SNP	Diploid		NA	NA	NA	4	69796318	69796318	G	C	4:g.69796318G>C	ENST00000251566.4:c.1250C>G							238	44717						CCLE	DSMZ	strongly adherent epitheloid cells growing in monolayers and forming islets	ACH-000342			~ 170 hrs	Caucasian	0.6185	10%DMSO	0		DMEM:HAM's F12 1:1 +20% FBS	Carcinoma	NS
Cancer Cell Line Encyclopedia (Broad, 2019)	3A2	CL34_LARGE_INTESTINE	Colorectal Cancer	Colorectal Adenocarcinoma	R515C	OncoKB: NA;CIViC: NA;MyCancerGenome: not present;CancerHotspot: no;3DHotspot: no	SIFT: impact: tolerated, score: 0.2;Polyphen-2: impact: benign, score: 0	Missense_Mutation	SNP	Diploid	5	NA	NA	NA	5	36035829	36035829	G	A	5:g.36035829G>A	ENST00000282507.3:c.1543C>T							1280	44749	1.77041e-05		rs201405999			CCLE	DSMZ	epithelial-like cells growing as monolayer; cells do not grow to complete confluency	ACH-000895			~ 48 hrs	Caucasian	0.149	10%DMSO	0		DMEM:HAM's F12 1:1 +20% FBS	Carcinoma	adenocarcinoma
Cancer Cell Line Encyclopedia (Broad, 2019)	2A E2-6	CME1_SOFT_TISSUE	Mixed Cancer Types	Mixed Cancer Types	G530E	OncoKB: NA;CIViC: NA;MyCancerGenome: not present;CancerHotspot: no;3DHotspot: no	SIFT: impact: tolerated, score: 0.27;Polyphen-2: impact: possibly_damaging, score: 0.53	Missense_Mutation	SNP			NA	NA	NA	4	70455112	70455112	C	T	4:g.70455112C>T	ENST00000457664.2:c.1589G>A							251	44718
Cancer Cell Line Encyclopedia (Broad, 2019)	1A3	CMLT1_HAEMATOPOIETIC_AND_LYMPHOID_TISSUE	Blood Cancer	Chronic Myelogenous Leukemia	L173*	OncoKB: NA;CIViC: NA;MyCancerGenome: not present;CancerHotspot: no;3DHotspot: no	SIFT: NA;Polyphen-2: NA	Frame_Shift_Del	DEL	Diploid	5	NA	NA	NA	2	234638283	234638283	T	-	2:g.234638283del	ENST00000482026.1:c.518del							2486	44682					36	CCLE	DSMZ	single, round cells insuspension	ACH-000920			~ 48-60 hrs	Asian	0.0424		0		90 % Iscove's MDMD or RPMI 1640 + 10% h.i. FBS	Haematopoietic_Neoplasm	blast_phase_chronic_myeloid_leukaemia
Cancer Cell Line Encyclopedia (Broad, 2019)	2B15	COGN305_AUTONOMIC_GANGLIA	Mixed Cancer Types	Mixed Cancer Types	F340L	OncoKB: NA;CIViC: NA;MyCancerGenome: not present;CancerHotspot: no;3DHotspot: no	SIFT: impact: deleterious, score: 0.02;Polyphen-2: impact: benign, score: 0.107	Missense_Mutation	SNP			NA	NA	NA	4	69520886	69520886	A	T	4:g.69520886A>T	ENST00000338206.5:c.1020T>A							183	44716			rs1306908715
Cancer Cell Line Encyclopedia (Broad, 2019)	1A5	COLO201_LARGE_INTESTINE	Colorectal Cancer	Colorectal Adenocarcinoma	T36I	OncoKB: NA;CIViC: NA;MyCancerGenome: not present;CancerHotspot: no;3DHotspot: no	SIFT: NA;Polyphen-2: NA	Missense_Mutation	SNP			NA	NA	NA	2	234621744	234621744	C	T	2:g.234621744C>T	ENST00000373414.3:c.107C>T							255	44682					70	CCLE		Suspension with some loosely attached cells	ACH-000253	colon_cancer			Caucasian		5%DMSO			RPMI-1640+10% FBS	Carcinoma	adenocarcinoma
Cancer Cell Line Encyclopedia (Broad, 2019)	2B15	COLO320_LARGE_INTESTINE	Colorectal Cancer	Colorectal Adenocarcinoma	D530Y	OncoKB: NA;CIViC: NA;MyCancerGenome: not present;CancerHotspot: no;3DHotspot: no	SIFT: impact: deleterious, score: 0;Polyphen-2: impact: benign, score: 0.271	Missense_Mutation	SNP	Amp		NA	NA	NA	4	69512827	69512827	C	A	4:g.69512827C>A	ENST00000338206.5:c.1588G>T							324	44718					55	CCLE	DSMZ	undifferentiated, round cells in suspension and loosely adherent in monolayers	ACH-000202			~ 38 hrs	Caucasian	0.7352		1		90% RPMI 1640 + 10% h.i. FBS	Carcinoma	adenocarcinoma
Cancer Cell Line Encyclopedia (Broad, 2019)	2B28	COLO678_LARGE_INTESTINE	Colorectal Cancer	Colorectal Adenocarcinoma	R182K	OncoKB: NA;CIViC: NA;MyCancerGenome: not present;CancerHotspot: no;3DHotspot: no	SIFT: impact: tolerated, score: 1;Polyphen-2: impact: benign, score: 0.001	Missense_Mutation	SNP	Diploid		NA	NA	NA	4	70146763	70146763	G	A	4:g.70146763G>A	ENST00000335568.5:c.545G>A							395	44713					69	CCLE	DSMZ	round or spindle - shaped adherent cells growing as monolayer	ACH-000350			~ 60-70 hrs	Caucasian	0.4583		1		90% RPMI 1640 + 10% h.i. FBS	Carcinoma	adenocarcinoma
Cancer Cell Line Encyclopedia (Broad, 2019)	2B10	COLO679_SKIN	Melanoma	Cutaneous Melanoma	L62I	OncoKB: NA;CIViC: NA;MyCancerGenome: not present;CancerHotspot: no;3DHotspot: no	SIFT: impact: tolerated, score: 0.15;Polyphen-2: impact: benign, score: 0.046	Missense_Mutation	SNP		3	NA	NA	NA	4	69681921	69681921	C	A	4:g.69681921C>A	ENST00000265403.7:c.184C>A							605	44713					47	CCLE	DSMZ	Adherent fibroblastic but not limited to monolayer.	ACH-000805		69.3		Caucasian	0.3599	10%DMSO	0		RPMI-1640+10% FBS	Malignant_Melanoma	NS
Cancer Cell Line Encyclopedia (Broad, 2019)	2B10	COLO741_SKIN	Melanoma	Cutaneous Melanoma	G525R	OncoKB: NA;CIViC: NA;MyCancerGenome: not present;CancerHotspot: no;3DHotspot: no	SIFT: impact: tolerated, score: 0.25;Polyphen-2: impact: benign, score: 0.005	Missense_Mutation	SNP		2	NA	NA	NA	4	69696583	69696583	G	A	4:g.69696583G>A	ENST00000265403.7:c.1573G>A							385	44718					69	CCLE	GNF		ACH-000582	colon_carcinoma and melanoma			Caucasian	0.5888		0			Malignant_Melanoma	NS
Cancer Cell Line Encyclopedia (Broad, 2019)	2B28	COLO783_SKIN	Melanoma	Cutaneous Melanoma	M292I	OncoKB: NA;CIViC: NA;MyCancerGenome: not present;CancerHotspot: no;3DHotspot: no	SIFT: impact: tolerated, score: 0.2;Polyphen-2: impact: benign, score: 0.03	Missense_Mutation	SNP	Diploid		NA	NA	NA	4	70152475	70152475	G	A	4:g.70152475G>A	ENST00000335568.5:c.876G>A							635	44715					48	CCLE	DSMZ	ADHERENT FIBROBLASTS, NOT LIMITED TO MONOLAYER GROWTH	ACH-000812		110.4	5-7 DAYS	Caucasian	0.4727	5%DMSO	1		RPMI-1640+10% FBS	Malignant_Melanoma	NS
Cancer Cell Line Encyclopedia (Broad, 2019)	1A6	COLO792_SKIN	Melanoma	Cutaneous Melanoma	P154S	OncoKB: NA;CIViC: NA;MyCancerGenome: not present;CancerHotspot: no;3DHotspot: no	SIFT: impact: deleterious, score: 0.03;Polyphen-2: impact: possibly_damaging, score: 0.589	Missense_Mutation	SNP	Diploid	1	NA	NA	NA	2	234602110	234602110	C	T	2:g.234602110C>T	ENST00000305139.6:c.460C>T							1870	44682					62	CCLE	ECACC	Epithelial adherent	ACH-000968		155.8		Caucasian	0.383	?	1		RPMI+10%FBS	Malignant_Melanoma	NS
Cancer Cell Line Encyclopedia (Broad, 2019)	1A4	CORL303_LUNG	Cancer of Unknown Primary	Cancer of Unknown Primary	A235G	OncoKB: NA;CIViC: NA;MyCancerGenome: not present;CancerHotspot: no;3DHotspot: no	SIFT: NA;Polyphen-2: NA	Missense_Mutation	SNP			NA	NA	NA	2	234628170	234628170	C	G	2:g.234628170C>G	ENST00000373409.3:c.704C>G							264	44682									ACH-002095
Cancer Cell Line Encyclopedia (Broad, 2019)	2B7	CP67MEL_SKIN	Cancer of Unknown Primary	Cancer of Unknown Primary	G300E	OncoKB: NA;CIViC: NA;MyCancerGenome: not present;CancerHotspot: no;3DHotspot: no	SIFT: impact: deleterious, score: 0;Polyphen-2: impact: probably_damaging, score: 0.978	Missense_Mutation	SNP		1	NA	NA	NA	4	69968553	69968553	G	A	4:g.69968553G>A	ENST00000305231.7:c.899G>A							675	44715									ACH-002098
Cancer Cell Line Encyclopedia (Broad, 2019)	1A E2-5	CROAP2_HAEMATOPOIETIC_AND_LYMPHOID_TISSUE	Cancer of Unknown Primary	Cancer of Unknown Primary	M403T	OncoKB: NA;CIViC: NA;MyCancerGenome: not present;CancerHotspot: no;3DHotspot: no	SIFT: impact: deleterious, score: 0;Polyphen-2: impact: probably_damaging, score: 0.994	Missense_Mutation	SNP			NA	NA	NA	2	234676992	234676992	T	C	2:g.234676992T>C	ENST00000305139.6:c.1208T>C							407	44685									ACH-002220
Cancer Cell Line Encyclopedia (Broad, 2019)	2B10	CTB1_HAEMATOPOIETIC_AND_LYMPHOID_TISSUE	Cancer of Unknown Primary	Cancer of Unknown Primary	R527Gfs*6	OncoKB: NA;CIViC: NA;MyCancerGenome: not present;CancerHotspot: no;3DHotspot: no	SIFT: NA;Polyphen-2: NA	Frame_Shift_Del	DEL			NA	NA	NA	4	69696585	69696585	A	-	4:g.69696585del	ENST00000265403.7:c.1579del							307	44718									ACH-002221
Cancer Cell Line Encyclopedia (Broad, 2019)	2B15	CTV1_HAEMATOPOIETIC_AND_LYMPHOID_TISSUE	Cancer of Unknown Primary	Cancer of Unknown Primary	L477I	OncoKB: NA;CIViC: NA;MyCancerGenome: not present;CancerHotspot: no;3DHotspot: no	SIFT: impact: deleterious, score: 0;Polyphen-2: impact: probably_damaging, score: 0.997	Missense_Mutation	SNP			NA	NA	NA	4	69512986	69512986	G	T	4:g.69512986G>T	ENST00000338206.5:c.1429C>A							3765	44718	3.97703e-06		rs761675749						ACH-002222
Cancer Cell Line Encyclopedia (Broad, 2019)	2B28	CW2_LARGE_INTESTINE	Colorectal Cancer	Colorectal Adenocarcinoma	F168S	OncoKB: NA;CIViC: NA;MyCancerGenome: not present;CancerHotspot: no;3DHotspot: no	SIFT: impact: deleterious, score: 0;Polyphen-2: impact: benign, score: 0.1	Missense_Mutation	SNP	Diploid		NA	NA	NA	4	70146721	70146721	T	C	4:g.70146721T>C	ENST00000335568.5:c.503T>C							8240	44713					55	CCLE	RIKEN	epithelial-like	ACH-000998				Asian	0.0293		0		RPMI 1640(or DM-160AU) +10%FBS	Carcinoma	NS
Cancer Cell Line Encyclopedia (Broad, 2019)	UGT8	D247MG_CENTRAL_NERVOUS_SYSTEM	Cancer of Unknown Primary	Cancer of Unknown Primary	R187C	OncoKB: NA;CIViC: NA;MyCancerGenome: not present;CancerHotspot: no;3DHotspot: no	SIFT: impact: deleterious, score: 0.01;Polyphen-2: impact: benign, score: 0.197	Missense_Mutation	SNP		4	NA	NA	NA	4	115544595	115544595	C	T	4:g.115544595C>T	ENST00000310836.6:c.559C>T							180	44714									ACH-002224
Cancer Cell Line Encyclopedia (Broad, 2019)	2B15	D423MG_CENTRAL_NERVOUS_SYSTEM	Cancer of Unknown Primary	Cancer of Unknown Primary	N104Kfs*19	OncoKB: NA;CIViC: NA;MyCancerGenome: not present;CancerHotspot: no;3DHotspot: no	SIFT: NA;Polyphen-2: NA	Frame_Shift_Ins	INS			NA	NA	NA	4	69536025	69536026	-	T	4:g.69536025_69536026insT	ENST00000338206.5:c.311dup							135	44713	3.99661e-06								ACH-002228
Cancer Cell Line Encyclopedia (Broad, 2019)	2B17	D502MG_CENTRAL_NERVOUS_SYSTEM	Cancer of Unknown Primary	Cancer of Unknown Primary	X438_splice	OncoKB: NA;CIViC: NA;MyCancerGenome: not present;CancerHotspot: no;3DHotspot: no	SIFT: NA;Polyphen-2: NA	Splice_Region	SNP			NA	NA	NA	4	69403622	69403622	G	A	4:g.69403622G>A	ENST00000317746.2:c.1314C>T							154	44718									ACH-002229
Cancer Cell Line Encyclopedia (Broad, 2019)	2B28	D566MG_CENTRAL_NERVOUS_SYSTEM	Cancer of Unknown Primary	Cancer of Unknown Primary	F519I	OncoKB: NA;CIViC: NA;MyCancerGenome: not present;CancerHotspot: no;3DHotspot: no	SIFT: impact: tolerated, score: 0.09;Polyphen-2: impact: benign, score: 0.127	Missense_Mutation	SNP		2	NA	NA	NA	4	70160492	70160492	T	A	4:g.70160492T>A	ENST00000335568.5:c.1555T>A							122	44718									ACH-002231
Cancer Cell Line Encyclopedia (Broad, 2019)	1A10	DAUDI_HAEMATOPOIETIC_AND_LYMPHOID_TISSUE	Mature B-Cell Neoplasms	Burkitt Lymphoma	C20F	OncoKB: NA;CIViC: NA;MyCancerGenome: not present;CancerHotspot: no;3DHotspot: no	SIFT: impact: tolerated, score: 0.73;Polyphen-2: impact: benign, score: 0.251	Missense_Mutation	SNP	Diploid		NA	NA	NA	2	234545227	234545227	G	T	2:g.234545227G>T	ENST00000344644.5:c.59G>T							4804	44682					16	CCLE	NIBRI		ACH-000786	lymphoma			African_american	0.0338		0			Lymphoid_Neoplasm	Burkitt_lymphoma
Cancer Cell Line Encyclopedia (Broad, 2019)	1A3	DG75_HAEMATOPOIETIC_AND_LYMPHOID_TISSUE	Cancer of Unknown Primary	Cancer of Unknown Primary	L173*	OncoKB: NA;CIViC: NA;MyCancerGenome: not present;CancerHotspot: no;3DHotspot: no	SIFT: NA;Polyphen-2: NA	Frame_Shift_Del	DEL		5	NA	NA	NA	2	234638283	234638283	T	-	2:g.234638283del	ENST00000482026.1:c.518del							1535	44682									ACH-002232
Cancer Cell Line Encyclopedia (Broad, 2019)	2B10	DIPG007_CENTRAL_NERVOUS_SYSTEM	Mixed Cancer Types	Mixed Cancer Types	G525R	OncoKB: NA;CIViC: NA;MyCancerGenome: not present;CancerHotspot: no;3DHotspot: no	SIFT: impact: tolerated, score: 0.25;Polyphen-2: impact: benign, score: 0.005	Missense_Mutation	SNP		2	NA	NA	NA	4	69696583	69696583	G	A	4:g.69696583G>A	ENST00000265403.7:c.1573G>A							200	44718
Cancer Cell Line Encyclopedia (Broad, 2019)	2B4	DKMG_CENTRAL_NERVOUS_SYSTEM	Glioma	Glioblastoma Multiforme	R96*	OncoKB: NA;CIViC: NA;MyCancerGenome: not present;CancerHotspot: no;3DHotspot: no	SIFT: NA;Polyphen-2: NA	Nonsense_Mutation	SNP	Diploid		NA	NA	NA	4	70361294	70361294	T	A	4:g.70361294T>A	ENST00000305107.6:c.286A>T							169	44713					67	CCLE	DSMZ	SPINDLE, FIBROBLAST-LIKE CELLS GROWING MOSTLY ADHERENT AS MONOLAYER	ACH-000244		77.7	50 hrs	Caucasian	0.2268	5% DMSO	0		RPMI-1640+10% FBS	Glioma	astrocytoma_Grade_IV
Cancer Cell Line Encyclopedia (Broad, 2019)	1A8	DMS153_LUNG	Small Cell Lung Cancer	Small Cell Lung Cancer	S8N	OncoKB: NA;CIViC: NA;MyCancerGenome: not present;CancerHotspot: no;3DHotspot: no	SIFT: impact: tolerated, score: 0.45;Polyphen-2: impact: benign, score: 0.018	Missense_Mutation	SNP	Diploid		NA	NA	NA	2	234526376	234526376	G	A	2:g.234526376G>A	ENST00000373450.4:c.23G>A							374	44682					44	CCLE	ATCC	Mixed line, loosely adherent	ACH-000594		63.5		Caucasian	0.3774	5%DMSO	0		Waymouth MB 7521 medium+10%FBS	Carcinoma	small_cell_carcinoma
Cancer Cell Line Encyclopedia (Broad, 2019)	2A3	DMS53_LUNG	Small Cell Lung Cancer	Small Cell Lung Cancer	V55I	OncoKB: NA;CIViC: NA;MyCancerGenome: not present;CancerHotspot: no;3DHotspot: no	SIFT: impact: tolerated, score: 0.09;Polyphen-2: impact: probably_damaging, score: 0.983	Missense_Mutation	SNP	Diploid		NA	NA	NA	4	69817316	69817316	C	T	4:g.69817316C>T	ENST00000251566.4:c.163G>A							694	44713					54	CCLE	ATCC	Adherent	ACH-000698	lung_cancer	450		Caucasian	0.7551	5%DMSO	1		Waymouth's +10%FBS	Carcinoma	small_cell_carcinoma
Cancer Cell Line Encyclopedia (Broad, 2019)	2B15	DMS79_LUNG	Small Cell Lung Cancer	Small Cell Lung Cancer	I259S	OncoKB: NA;CIViC: NA;MyCancerGenome: not present;CancerHotspot: no;3DHotspot: no	SIFT: impact: deleterious, score: 0;Polyphen-2: impact: possibly_damaging, score: 0.616	Missense_Mutation	SNP	Diploid		NA	NA	NA	4	69533855	69533855	A	C	4:g.69533855A>C	ENST00000338206.5:c.776T>G							518	44714					65	CCLE	ATCC	Suspension; multicell aggregates	ACH-000703		244		Caucasian	0.8655	5% DMSO	1		RPMI-1640+10%FBS	Carcinoma	small_cell_carcinoma
Cancer Cell Line Encyclopedia (Broad, 2019)	1A10	DND41_HAEMATOPOIETIC_AND_LYMPHOID_TISSUE	T-Lymphoblastic Leukemia/Lymphoma	T-Lymphoblastic Leukemia/Lymphoma	N276K	OncoKB: NA;CIViC: NA;MyCancerGenome: not present;CancerHotspot: no;3DHotspot: no	SIFT: impact: deleterious, score: 0;Polyphen-2: impact: possibly_damaging, score: 0.741	Missense_Mutation	SNP	Diploid		NA	NA	NA	2	234545996	234545996	C	A	2:g.234545996C>A	ENST00000344644.5:c.828C>A							2745	44682					13	CCLE	DSMZ	round cells growing singl or, occasionally, in clumps	ACH-000981	TALL	139.1	~ 35 hrs	Caucasian	0.1197		0		90%RPMI 1640+ 10% h.i. FBS	Lymphoid_Neoplasm	acute_lymphoblastic_T_cell_leukaemia
Cancer Cell Line Encyclopedia (Broad, 2019)	2B28	DU145_PROSTATE	Prostate Cancer	Prostate Adenocarcinoma	S421*	OncoKB: NA;CIViC: NA;MyCancerGenome: not present;CancerHotspot: no;3DHotspot: no	SIFT: NA;Polyphen-2: NA	Nonsense_Mutation	SNP	Diploid		NA	NA	NA	4	70156481	70156481	C	A	4:g.70156481C>A	ENST00000335568.5:c.1262C>A							3187	44717					69	CCLE	ATCC	ADHERENT EPITHELIAL;	ACH-000979	prostate_cancer	161		Caucasian	0.5916	5% DMSO	1		EMEM + 10% FBS	Carcinoma	NS
Cancer Cell Line Encyclopedia (Broad, 2019)	1A E2-5	DV90_LUNG	Non-Small Cell Lung Cancer	Non-Small Cell Lung Cancer	K401T	OncoKB: NA;CIViC: NA;MyCancerGenome: not present;CancerHotspot: no;3DHotspot: no	SIFT: impact: tolerated, score: 0.05;Polyphen-2: impact: probably_damaging, score: 0.986	Missense_Mutation	SNP	Diploid		NA	NA	NA	2	234676986	234676986	A	C	2:g.234676986A>C	ENST00000305139.6:c.1202A>C							1571	44685					50	CCLE	DSMZ	ADHERENT CELLS GROWING IN MONOLAYERS	ACH-000925	lung_cancer	43.6	95 hrs	Caucasian	0.0963	5% DMSO	0		RPMI-1640+10% FBS	Carcinoma	adenocarcinoma
Cancer Cell Line Encyclopedia (Broad, 2019)	2B11	EB3_HAEMATOPOIETIC_AND_LYMPHOID_TISSUE	Cancer of Unknown Primary	Cancer of Unknown Primary	R167Q	OncoKB: NA;CIViC: NA;MyCancerGenome: not present;CancerHotspot: no;3DHotspot: no	SIFT: impact: deleterious, score: 0.02;Polyphen-2: impact: benign, score: 0.001	Missense_Mutation	SNP		2	NA	NA	NA	4	70079941	70079941	C	T	4:g.70079941C>T	ENST00000446444.1:c.500G>A							319	44713									ACH-002236
Cancer Cell Line Encyclopedia (Broad, 2019)	2B10	ECC12_STOMACH	Esophagogastric Cancer	Esophageal Squamous Cell Carcinoma	Q486*	OncoKB: NA;CIViC: NA;MyCancerGenome: not present;CancerHotspot: no;3DHotspot: no	SIFT: NA;Polyphen-2: NA	Nonsense_Mutation	SNP			NA	NA	NA	4	69696466	69696466	C	T	4:g.69696466C>T	ENST00000265403.7:c.1456C>T							298	44718					63	CCLE	Riken	Adherent	ACH-000225		95.9		Asian	0.3448	5% DMSO	1		RPMI-1640+10% FBS	Carcinoma	small_cell_adenocarcinoma
Cancer Cell Line Encyclopedia (Broad, 2019)	2B11	EKVX_LUNG	Non-Small Cell Lung Cancer	Non-Small Cell Lung Cancer	D424Y	OncoKB: NA;CIViC: NA;MyCancerGenome: not present;CancerHotspot: no;3DHotspot: no	SIFT: impact: deleterious, score: 0.02;Polyphen-2: impact: probably_damaging, score: 0.997	Missense_Mutation	SNP	Diploid	1	NA	NA	NA	4	70070188	70070188	C	A	4:g.70070188C>A	ENST00000446444.1:c.1270G>T							438	44717						CCLE	Garraway Lab	Adherent	ACH-000706		68.4		Caucasian	0.479	5% DMSO			RPMI-1640+ 5% FBS	Carcinoma	adenocarcinoma
Cancer Cell Line Encyclopedia (Broad, 2019)	2B7	EM2_HAEMATOPOIETIC_AND_LYMPHOID_TISSUE	Blood Cancer	Chronic Myelogenous Leukemia	A60S	OncoKB: NA;CIViC: NA;MyCancerGenome: not present;CancerHotspot: no;3DHotspot: no	SIFT: impact: tolerated, score: 0.23;Polyphen-2: impact: benign, score: 0.05	Missense_Mutation	SNP	Diploid		NA	NA	NA	4	69962416	69962416	G	T	4:g.69962416G>T	ENST00000305231.7:c.178G>T							245	44713			rs1314561243		5	CCLE	DSMZ	single, round to oval cells in suspention	ACH-000295		65.8	~ 35-40 hrs	Caucasian	0.5845		0		90% RPMI 1640 +10% h.i. FBS	Haematopoietic_Neoplasm	blast_phase_chronic_myeloid_leukaemia
Cancer Cell Line Encyclopedia (Broad, 2019)	1A E2-5	EN_ENDOMETRIUM	Endometrial Cancer	Endometrial Carcinoma	M440V	OncoKB: NA;CIViC: NA;MyCancerGenome: not present;CancerHotspot: no;3DHotspot: no	SIFT: impact: tolerated, score: 0.09;Polyphen-2: impact: benign, score: 0.062	Missense_Mutation	SNP	Diploid	1	NA	NA	NA	2	234680924	234680924	A	G	2:g.234680924A>G	ENST00000305139.6:c.1318A>G							5949	44686					50	CCLE	DSMZ	adherent epitheloid cells growing in monolayers	ACH-000978	Endometrial Cancer	93.9	50-80 hrs	Asian	0.2175	5% DMSO	0	japan	DMEM+20% FBS	Carcinoma	NS
Cancer Cell Line Encyclopedia (Broad, 2019)	2B28	EPLC272H_LUNG	Non-Small Cell Lung Cancer	Non-Small Cell Lung Cancer	G278Wfs*13	OncoKB: NA;CIViC: NA;MyCancerGenome: not present;CancerHotspot: no;3DHotspot: no	SIFT: NA;Polyphen-2: NA	Frame_Shift_Ins	INS	Diploid		NA	NA	NA	4	70148339	70148340	-	T	4:g.70148339_70148340insT	ENST00000335568.5:c.831dup							415	44714					57	CCLE	DSMZ		ACH-000585		79.1		Caucasian	0.6482	5%DMSO	1		RPMI-1640+20% FBS	Carcinoma	squamous_cell_carcinoma
Cancer Cell Line Encyclopedia (Broad, 2019)	2B11	ES2_OVARY	Ovarian Cancer	Ovarian Carcinosarcoma/Malignant Mixed Mesodermal Tumor	N213I	OncoKB: NA;CIViC: NA;MyCancerGenome: not present;CancerHotspot: no;3DHotspot: no	SIFT: impact: deleterious, score: 0;Polyphen-2: impact: probably_damaging, score: 0.995	Missense_Mutation	SNP	DeepDel		NA	NA	NA	4	70079803	70079803	T	A	4:g.70079803T>A	ENST00000446444.1:c.638A>T							586	44713					47	CCLE	ATCC	ADHERENT FIBROBLASTS	ACH-000906	ovarian_cancer	25.8		Caucasian	0.41	5% DMSO	1		McCOY'S5A + 10%FBS	Carcinoma	clear_cell_carcinoma
Cancer Cell Line Encyclopedia (Broad, 2019)	1A10	ES3_BONE	Cancer of Unknown Primary	Cancer of Unknown Primary	T79N	OncoKB: NA;CIViC: NA;MyCancerGenome: not present;CancerHotspot: no;3DHotspot: no	SIFT: impact: deleterious, score: 0;Polyphen-2: impact: benign, score: 0.022	Missense_Mutation	SNP		2	NA	NA	NA	2	234545404	234545404	C	A	2:g.234545404C>A	ENST00000344644.5:c.236C>A							153	44682									ACH-002104
Cancer Cell Line Encyclopedia (Broad, 2019)	2A E2-6	ES6_BONE	Cancer of Unknown Primary	Cancer of Unknown Primary	A260D	OncoKB: NA;CIViC: NA;MyCancerGenome: not present;CancerHotspot: no;3DHotspot: no	SIFT: impact: deleterious, score: 0;Polyphen-2: impact: probably_damaging, score: 1	Missense_Mutation	SNP			NA	NA	NA	4	70465076	70465076	G	T	4:g.70465076G>T	ENST00000457664.2:c.779C>A							164	44714									ACH-002107
Cancer Cell Line Encyclopedia (Broad, 2019)	2B28	ESO51_OESOPHAGUS	Cancer of Unknown Primary	Cancer of Unknown Primary	F519I	OncoKB: NA;CIViC: NA;MyCancerGenome: not present;CancerHotspot: no;3DHotspot: no	SIFT: impact: tolerated, score: 0.09;Polyphen-2: impact: benign, score: 0.127	Missense_Mutation	SNP		2	NA	NA	NA	4	70160492	70160492	T	A	4:g.70160492T>A	ENST00000335568.5:c.1555T>A							309	44718									ACH-001497
Cancer Cell Line Encyclopedia (Broad, 2019)	2B4	ESS1_ENDOMETRIUM	Endometrial Cancer	Endometrial Carcinoma	R447I	OncoKB: NA;CIViC: NA;MyCancerGenome: not present;CancerHotspot: no;3DHotspot: no	SIFT: impact: deleterious, score: 0.02;Polyphen-2: impact: benign, score: 0.031	Missense_Mutation	SNP	Diploid		NA	NA	NA	4	70346599	70346599	C	A	4:g.70346599C>A	ENST00000305107.6:c.1340G>T							1075	44718					76	CCLE			ACH-000913		49.1	120hrs??	Caucasian	0.0878	5% DMSO	0			Carcinoma	carcinosarcoma-malignant_mesodermal_mixed_tumour
Cancer Cell Line Encyclopedia (Broad, 2019)	3A2	EW11_BONE	Cancer of Unknown Primary	Cancer of Unknown Primary	C307R	OncoKB: NA;CIViC: NA;MyCancerGenome: not present;CancerHotspot: no;3DHotspot: no	SIFT: impact: tolerated, score: 0.21;Polyphen-2: impact: benign, score: 0.124	Missense_Mutation	SNP			NA	NA	NA	5	36039735	36039735	A	G	5:g.36039735A>G	ENST00000282507.3:c.919T>C							200	44747	2.38588e-05		rs574500006						ACH-002111
Cancer Cell Line Encyclopedia (Broad, 2019)	1A1	EW8_BONE	Bone Cancer	Ewing SarcomaÃƒ_	D103Y	OncoKB: NA;CIViC: NA;MyCancerGenome: not present;CancerHotspot: no;3DHotspot: no	SIFT: NA;Polyphen-2: NA	Missense_Mutation	SNP	Diploid	1	NA	NA	NA	2	234669240	234669240	G	T	2:g.234669240G>T	ENST00000305208.5:c.307G>T							233	44682						ACHILLES			ACH-000499				Caucasian	0.4229		1			Ewings_Sarcoma-Peripheral_Primitive_Neuroectodermal_Tumour	NS
Cancer Cell Line Encyclopedia (Broad, 2019)	1A8	EWS502_BONE	Bone Cancer	Ewing SarcomaÃƒ_	M91T	OncoKB: NA;CIViC: NA;MyCancerGenome: not present;CancerHotspot: no;3DHotspot: no	SIFT: impact: tolerated, score: 0.64;Polyphen-2: impact: benign, score: 0.062	Missense_Mutation	SNP	Diploid		NA	NA	NA	2	234526625	234526625	T	C	2:g.234526625T>C	ENST00000373450.4:c.272T>C							200	44682						ACHILLES			ACH-000279				Caucasian	0.5097		1			Ewings_Sarcoma-Peripheral_Primitive_Neuroectodermal_Tumour	NS
Cancer Cell Line Encyclopedia (Broad, 2019)	2B17	EWS834_BONE	Mixed Cancer Types	Mixed Cancer Types	T246K	OncoKB: NA;CIViC: NA;MyCancerGenome: not present;CancerHotspot: no;3DHotspot: no	SIFT: impact: tolerated, score: 0.05;Polyphen-2: impact: possibly_damaging, score: 0.506	Missense_Mutation	SNP			NA	NA	NA	4	69431426	69431426	G	T	4:g.69431426G>T	ENST00000317746.2:c.737C>A							111	44714
Cancer Cell Line Encyclopedia (Broad, 2019)	1A4	FADU_UPPER_AERODIGESTIVE_TRACT	Esophagogastric Cancer	Esophageal Poorly Differentiated Carcinoma	E64D	OncoKB: NA;CIViC: NA;MyCancerGenome: not present;CancerHotspot: no;3DHotspot: no	SIFT: NA;Polyphen-2: NA	Missense_Mutation	SNP	Diploid	1	NA	NA	NA	2	234627658	234627658	G	C	2:g.234627658G>C	ENST00000373409.3:c.192G>C							482	44682					56	CCLE	NIBRI		ACH-000846		33.3		Caucasian	0.5654		0			Carcinoma	squamous_cell_carcinoma
Cancer Cell Line Encyclopedia (Broad, 2019)	2B15	FARAGE_HAEMATOPOIETIC_AND_LYMPHOID_TISSUE	Cancer of Unknown Primary	Cancer of Unknown Primary	D425N	OncoKB: NA;CIViC: NA;MyCancerGenome: not present;CancerHotspot: no;3DHotspot: no	SIFT: impact: deleterious, score: 0.03;Polyphen-2: impact: benign, score: 0.429	Missense_Mutation	SNP			NA	NA	NA	4	69519795	69519795	C	T	4:g.69519795C>T	ENST00000338206.5:c.1273G>A							1123	44717									ACH-001498
Cancer Cell Line Encyclopedia (Broad, 2019)	2A3	FTC133_THYROID	Thyroid Cancer	Poorly Differentiated Thyroid Cancer	R467C	OncoKB: NA;CIViC: NA;MyCancerGenome: not present;CancerHotspot: no;3DHotspot: no	SIFT: impact: deleterious, score: 0.04;Polyphen-2: impact: benign, score: 0.08	Missense_Mutation	SNP	Diploid	2	NA	NA	NA	4	69795716	69795716	G	A	4:g.69795716G>A	ENST00000251566.4:c.1399C>T							751	44718					42	CCLE	ECACC	ADHERENT	ACH-000903		52		Caucasian	0.3848	5%DMSO	0		DMEM:F12+10% FBS	Carcinoma	follicular_carcinoma
Cancer Cell Line Encyclopedia (Broad, 2019)	2B4	FTC238_THYROID	Thyroid Cancer	Poorly Differentiated Thyroid Cancer	R210M	OncoKB: NA;CIViC: NA;MyCancerGenome: not present;CancerHotspot: no;3DHotspot: no	SIFT: impact: deleterious, score: 0;Polyphen-2: impact: probably_damaging, score: 0.976	Missense_Mutation	SNP	DeepDel		NA	NA	NA	4	70360951	70360951	C	A	4:g.70360951C>A	ENST00000305107.6:c.629G>T							948	44713					42	CCLE	ECACC	ADHERENT	ACH-000897		59		Caucasian	0.6324	5% DMSO	1		DMEM:F12 (1:1)+5%FBS	Carcinoma	follicular_carcinoma
Cancer Cell Line Encyclopedia (Broad, 2019)	2B28	FU97_STOMACH	Esophagogastric Cancer	Esophageal Squamous Cell Carcinoma	C127*	OncoKB: NA;CIViC: NA;MyCancerGenome: not present;CancerHotspot: no;3DHotspot: no	SIFT: NA;Polyphen-2: NA	Nonsense_Mutation	SNP	Amp		NA	NA	NA	4	70146599	70146599	T	A	4:g.70146599T>A	ENST00000335568.5:c.381T>A							455	44713					66	CCLE	HSRRB	ADHRENT EPITHELIAL; was clumpy	ACH-000633		48.5	95 hrs	Asian	0.5532	5% DMSO	2	japan	DMEM + 10% FBS	Carcinoma	diffuse_adenocarcinoma
Cancer Cell Line Encyclopedia (Broad, 2019)	2A E2-6	G402_SOFT_TISSUE	Soft Tissue Sarcoma	Embryonal Rhabdomyosarcoma	X341_splice	OncoKB: NA;CIViC: NA;MyCancerGenome: not present;CancerHotspot: no;3DHotspot: no	SIFT: NA;Polyphen-2: NA	Splice_Region	SNP	Diploid		NA	NA	NA	4	70461968	70461968	C	T	4:g.70461968C>T	ENST00000457664.2:c.1023G>A							266	44715					0.75	CCLE			ACH-000375	renal_leiomyoblastoma	42.1		Caucasian	0.1146	5% DMSO	0			Rhabdoid_Tumour	NS
Cancer Cell Line Encyclopedia (Broad, 2019)	2B7	GB1_CENTRAL_NERVOUS_SYSTEM	Glioma	Glioblastoma Multiforme	E75*	OncoKB: NA;CIViC: NA;MyCancerGenome: not present;CancerHotspot: no;3DHotspot: no	SIFT: NA;Polyphen-2: NA	Nonsense_Mutation	SNP	Diploid		NA	NA	NA	4	69962461	69962461	G	T	4:g.69962461G>T	ENST00000305231.7:c.223G>T							466	44713					35	CCLE	HSSRB		ACH-000738				Asian	0.5596		1		Dulbecco's modified Eagle's medium with 10% fetal calf serum	Glioma	astrocytoma_Grade_IV
Cancer Cell Line Encyclopedia (Broad, 2019)	UGT8	GCT_SOFT_TISSUE	Soft Tissue Sarcoma	Embryonal Rhabdomyosarcoma	P165L	OncoKB: NA;CIViC: NA;MyCancerGenome: not present;CancerHotspot: no;3DHotspot: no	SIFT: impact: deleterious, score: 0.05;Polyphen-2: impact: possibly_damaging, score: 0.566	Missense_Mutation	SNP	Diploid		NA	NA	NA	4	115544530	115544530	C	T	4:g.115544530C>T	ENST00000310836.6:c.494C>T							711	44714					29	CCLE	NIBRI		ACH-000835		64.6		Caucasian	0.4429		1			Malignant_Fibrous_Histiocytoma-Pleomorphic_Sarcoma	NS
Cancer Cell Line Encyclopedia (Broad, 2019)	2B11	GEO_LARGE_INTESTINE	Cancer of Unknown Primary	Cancer of Unknown Primary	F123L	OncoKB: NA;CIViC: NA;MyCancerGenome: not present;CancerHotspot: no;3DHotspot: no	SIFT: impact: tolerated, score: 0.7;Polyphen-2: impact: benign, score: 0.001	Missense_Mutation	SNP			NA	NA	NA	4	70080074	70080074	A	G	4:g.70080074A>G	ENST00000446444.1:c.367T>C							333	44713									ACH-002394
Cancer Cell Line Encyclopedia (Broad, 2019)	2B15	GIMEN_AUTONOMIC_GANGLIA	Cancer of Unknown Primary	Cancer of Unknown Primary	V28L	OncoKB: NA;CIViC: NA;MyCancerGenome: not present;CancerHotspot: no;3DHotspot: no	SIFT: impact: deleterious, score: 0;Polyphen-2: impact: possibly_damaging, score: 0.859	Missense_Mutation	SNP			NA	NA	NA	4	69536255	69536255	C	G	4:g.69536255C>G	ENST00000338206.5:c.82G>C							437	44713									ACH-001344
Cancer Cell Line Encyclopedia (Broad, 2019)	1A3	GP2D_LARGE_INTESTINE	Colorectal Cancer	Colorectal Adenocarcinoma	L173*	OncoKB: NA;CIViC: NA;MyCancerGenome: not present;CancerHotspot: no;3DHotspot: no	SIFT: NA;Polyphen-2: NA	Frame_Shift_Del	DEL	Diploid	5	NA	NA	NA	2	234638283	234638283	T	-	2:g.234638283del	ENST00000482026.1:c.518del							5043	44682					71	CCLE	ECACC	Epithelial adherent	ACH-000982		77.1		Caucasian	0.0418	?	0		DMEM+10%FBS	Carcinoma	adenocarcinoma
Cancer Cell Line Encyclopedia (Broad, 2019)	2B11	GP5D_LARGE_INTESTINE	Cancer of Unknown Primary	Cancer of Unknown Primary	V306L	OncoKB: NA;CIViC: NA;MyCancerGenome: not present;CancerHotspot: no;3DHotspot: no	SIFT: impact: deleterious, score: 0.02;Polyphen-2: impact: benign, score: 0.231	Missense_Mutation	SNP			NA	NA	NA	4	70074155	70074155	C	A	4:g.70074155C>A	ENST00000446444.1:c.916G>T							4941	44715									ACH-001345
Cancer Cell Line Encyclopedia (Broad, 2019)	1A4	GRST_HAEMATOPOIETIC_AND_LYMPHOID_TISSUE	Cancer of Unknown Primary	Cancer of Unknown Primary	W173Gfs*8	OncoKB: NA;CIViC: NA;MyCancerGenome: not present;CancerHotspot: no;3DHotspot: no	SIFT: NA;Polyphen-2: NA	Frame_Shift_Del	DEL		2	NA	NA	NA	2	234627977	234627977	T	-	2:g.234627977del	ENST00000373409.3:c.517del							2922	44682									ACH-002238
Cancer Cell Line Encyclopedia (Broad, 2019)	1A3	GSS_STOMACH	Esophagogastric Cancer	Esophageal Squamous Cell Carcinoma	C281_N283del	OncoKB: NA;CIViC: NA;MyCancerGenome: not present;CancerHotspot: no;3DHotspot: no	SIFT: NA;Polyphen-2: NA	In_Frame_Del	DEL	Diploid		NA	NA	NA	2	234638609	234638617	CAACTGTGC	-	2:g.234638609_234638617del	ENST00000482026.1:c.841_849del							364	44682						CCLE	RIKEN	other	ACH-000746				Asian	0.7102		1		RPMI 1640 +10%FBS	Carcinoma	adenocarcinoma
Cancer Cell Line Encyclopedia (Broad, 2019)	2B15	GT3TKB_STOMACH	Cancer of Unknown Primary	Cancer of Unknown Primary	I418M	OncoKB: NA;CIViC: NA;MyCancerGenome: not present;CancerHotspot: no;3DHotspot: no	SIFT: impact: tolerated, score: 0.2;Polyphen-2: impact: benign, score: 0.068	Missense_Mutation	SNP			NA	NA	NA	4	69519814	69519814	G	C	4:g.69519814G>C	ENST00000338206.5:c.1254C>G							248	44717									ACH-002122
Cancer Cell Line Encyclopedia (Broad, 2019)	2A E2-6	HARA_LUNG	Non-Small Cell Lung Cancer	Non-Small Cell Lung Cancer	T252M	OncoKB: NA;CIViC: NA;MyCancerGenome: not present;CancerHotspot: no;3DHotspot: no	SIFT: impact: deleterious, score: 0;Polyphen-2: impact: probably_damaging, score: 1	Missense_Mutation	SNP	Diploid		NA	NA	NA	4	70465100	70465100	G	A	4:g.70465100G>A	ENST00000457664.2:c.755C>T							835	44714					57	CCLE	HSRRB	ADHERENT; fast grower	ACH-000843	Lung Cancer	63.7		Asian	0.6587	5% DMSO	1		RPMI-1640+10% FBS	Carcinoma	squamous_cell_carcinoma
Cancer Cell Line Encyclopedia (Broad, 2019)	1A E2-5	HCC1187_BREAST	Breast Cancer	Invasive Breast Carcinoma	S444I	OncoKB: NA;CIViC: NA;MyCancerGenome: not present;CancerHotspot: no;3DHotspot: no	SIFT: impact: deleterious, score: 0.03;Polyphen-2: impact: possibly_damaging, score: 0.774	Missense_Mutation	SNP	Diploid	2	NA	NA	NA	2	234680937	234680937	G	T	2:g.234680937G>T	ENST00000305139.6:c.1331G>T							212	44686					41	CCLE	ATCC	Epithelial; mixed adherent and suspension	ACH-000111	ductal_carcinoma	66		Caucasian	0.873	5%DMSO	0		RPMI-1640+10% FBS	Carcinoma	ductal_carcinoma
Cancer Cell Line Encyclopedia (Broad, 2019)	2B28	HCC1438_LUNG	Non-Small Cell Lung Cancer	Non-Small Cell Lung Cancer	T373S	OncoKB: NA;CIViC: NA;MyCancerGenome: not present;CancerHotspot: no;3DHotspot: no	SIFT: impact: deleterious, score: 0;Polyphen-2: impact: possibly_damaging, score: 0.898	Missense_Mutation	SNP			NA	NA	NA	4	70156337	70156337	C	G	4:g.70156337C>G	ENST00000335568.5:c.1118C>G							641	44717					43	CCLE	KCLB	epithelial; monolayer	ACH-000891				African_american					RPMI 1640 with L-glutamine (300mg/L), 90%; heat inactivated fetal bovine serum (FBS),10%	Carcinoma	large_cell_carcinoma
Cancer Cell Line Encyclopedia (Broad, 2019)	1A7	HCC1569_BREAST	Breast Cancer	Invasive Breast Carcinoma	F197L	OncoKB: NA;CIViC: NA;MyCancerGenome: not present;CancerHotspot: no;3DHotspot: no	SIFT: NA;Polyphen-2: NA	Missense_Mutation	SNP	Diploid		NA	NA	NA	2	234591172	234591172	T	C	2:g.234591172T>C	ENST00000373426.3:c.589T>C							2181	44682					70	CCLE		mixed	ACH-000930	metaplastic_breast_carcinoma			African_american	0.542	5%DMSO	1		RPMI1640+10%FBS	Carcinoma	metaplastic_carcinoma
Cancer Cell Line Encyclopedia (Broad, 2019)	1A5	HCC1599_BREAST	Breast Cancer	Invasive Breast Carcinoma	Q209R	OncoKB: NA;CIViC: NA;MyCancerGenome: not present;CancerHotspot: no;3DHotspot: no	SIFT: NA;Polyphen-2: NA	Missense_Mutation	SNP	Diploid		NA	NA	NA	2	234622263	234622263	A	G	2:g.234622263A>G	ENST00000373414.3:c.626A>G							360	44682					44	CCLE	ATCC	suspension, multicell aggregates	ACH-000196		179.8		Caucasian	0.6315	5%DMSO	1		RPMI-1640+10% FBS	Carcinoma	ductal_carcinoma
Cancer Cell Line Encyclopedia (Broad, 2019)	1A8	HCC1806_BREAST	Breast Cancer	Invasive Breast Carcinoma	F223Lfs*7	OncoKB: NA;CIViC: NA;MyCancerGenome: not present;CancerHotspot: no;3DHotspot: no	SIFT: NA;Polyphen-2: NA	Frame_Shift_Ins	INS	Diploid		NA	NA	NA	2	234527018	234527019	-	TC	2:g.234527018_234527019insTC	ENST00000373450.4:c.666_667insCT							278	44682					60	CCLE	NIBRI		ACH-000624	breast_cancer			African_american	0.446		1			Carcinoma	ductal_carcinoma
Cancer Cell Line Encyclopedia (Broad, 2019)	2A E2-6	HCC202_BREAST	Breast Cancer	Invasive Breast Carcinoma	M450I	OncoKB: NA;CIViC: NA;MyCancerGenome: not present;CancerHotspot: no;3DHotspot: no	SIFT: impact: deleterious, score: 0.02;Polyphen-2: impact: benign, score: 0.003	Missense_Mutation	SNP	Diploid		NA	NA	NA	4	70455351	70455351	C	T	4:g.70455351C>T	ENST00000457664.2:c.1350G>A							477	44718					82	CCLE	ATCC	Adherent	ACH-000725	ductal_carcinoma	261.1		Caucasian	0.67	5%DMSO	1		RPMI+10%FBS	Carcinoma	ductal_carcinoma
Cancer Cell Line Encyclopedia (Broad, 2019)	1A4	HCC2218_BREAST	Breast Cancer	Invasive Breast Carcinoma	E50G	OncoKB: NA;CIViC: NA;MyCancerGenome: not present;CancerHotspot: no;3DHotspot: no	SIFT: NA;Polyphen-2: NA	Missense_Mutation	SNP	Diploid		NA	NA	NA	2	234627615	234627615	A	G	2:g.234627615A>G	ENST00000373409.3:c.149A>G							373	44682					38	CCLE	ATCC	SUSPENSION	ACH-000755		147.7		Caucasian	0.4123	5% DMSO	0		RPMI 1640 +10%FBS	Carcinoma	ductal_carcinoma
Cancer Cell Line Encyclopedia (Broad, 2019)	3A1	HCC2450_LUNG	Cancer of Unknown Primary	Cancer of Unknown Primary	D216V	OncoKB: NA;CIViC: NA;MyCancerGenome: not present;CancerHotspot: no;3DHotspot: no	SIFT: impact: tolerated, score: 0.48;Polyphen-2: impact: benign, score: 0.14	Missense_Mutation	SNP			NA	NA	NA	5	35965684	35965684	T	A	5:g.35965684T>A	ENST00000274278.3:c.647A>T							2507	44746									ACH-000975
Cancer Cell Line Encyclopedia (Broad, 2019)	1A7	HCC2998_LARGE_INTESTINE	Cancer of Unknown Primary	Cancer of Unknown Primary	R254Q	OncoKB: NA;CIViC: NA;MyCancerGenome: not present;CancerHotspot: no;3DHotspot: no	SIFT: NA;Polyphen-2: NA	Missense_Mutation	SNP		2	NA	NA	NA	2	234591344	234591344	G	A	2:g.234591344G>A	ENST00000373426.3:c.761G>A							6986	44682									ACH-001081
Cancer Cell Line Encyclopedia (Broad, 2019)	2B28	HCC44_LUNG	Non-Small Cell Lung Cancer	Non-Small Cell Lung Cancer	D68G	OncoKB: NA;CIViC: NA;MyCancerGenome: not present;CancerHotspot: no;3DHotspot: no	SIFT: impact: tolerated, score: 0.06;Polyphen-2: impact: benign, score: 0.158	Missense_Mutation	SNP	Diploid		NA	NA	NA	4	70146421	70146421	A	G	4:g.70146421A>G	ENST00000335568.5:c.203A>G							464	44713					54	CCLE	DSMZ	Adhrent cells growing as monolayers; dt=30hrs	ACH-000667	lung_cancer	33	30	Caucasian	0.4706	10% DMSO	2		RPMI-1640+10%FBS	Carcinoma	adenocarcinoma
Cancer Cell Line Encyclopedia (Broad, 2019)	2B4	HCC461_LUNG	Cancer of Unknown Primary	Cancer of Unknown Primary	V131L	OncoKB: NA;CIViC: NA;MyCancerGenome: not present;CancerHotspot: no;3DHotspot: no	SIFT: impact: tolerated, score: 0.23;Polyphen-2: impact: benign, score: 0.054	Missense_Mutation	SNP			NA	NA	NA	4	70361189	70361189	C	G	4:g.70361189C>G	ENST00000305107.6:c.391G>C							240	44713									ACH-000339
Cancer Cell Line Encyclopedia (Broad, 2019)	1A7	HCC515_LUNG	Cancer of Unknown Primary	Cancer of Unknown Primary	P267Q	OncoKB: NA;CIViC: NA;MyCancerGenome: not present;CancerHotspot: no;3DHotspot: no	SIFT: NA;Polyphen-2: NA	Missense_Mutation	DNP			NA	NA	NA	2	234591383	234591384	CC	AA	2:g.234591383_234591384delinsAA	ENST00000373426.3:c.800_801delinsAA							1093	44682									ACH-000872
Cancer Cell Line Encyclopedia (Broad, 2019)	2B11	HCC827_LUNG	Non-Small Cell Lung Cancer	Non-Small Cell Lung Cancer	A327D	OncoKB: NA;CIViC: NA;MyCancerGenome: not present;CancerHotspot: no;3DHotspot: no	SIFT: impact: deleterious, score: 0.01;Polyphen-2: impact: probably_damaging, score: 0.991	Missense_Mutation	SNP	Diploid		NA	NA	NA	4	70074091	70074091	G	T	4:g.70074091G>T	ENST00000446444.1:c.980C>A							201	44715					39	CCLE	ATCC	Adherent	ACH-000012	lung_cancer	117.6		Caucasian	0.5552	5%DMSO	1		RPMI-1640 10% FBS	Carcinoma	adenocarcinoma
Cancer Cell Line Encyclopedia (Broad, 2019)	2B11	HCC827GR5_LUNG	Non-Small Cell Lung Cancer	Non-Small Cell Lung Cancer	G186R	OncoKB: NA;CIViC: NA;MyCancerGenome: not present;CancerHotspot: no;3DHotspot: no	SIFT: impact: deleterious, score: 0.05;Polyphen-2: impact: benign, score: 0.104	Missense_Mutation	SNP			NA	NA	NA	4	70079885	70079885	C	T	4:g.70079885C>T	ENST00000446444.1:c.556G>A							303	44713						ACHILLES			ACH-000029				Caucasian						Carcinoma	non_small_cell_carcinoma
Cancer Cell Line Encyclopedia (Broad, 2019)	2B7	HCT116_LARGE_INTESTINE	Colorectal Cancer	Colorectal Adenocarcinoma	R459*	OncoKB: NA;CIViC: NA;MyCancerGenome: not present;CancerHotspot: no;3DHotspot: no	SIFT: NA;Polyphen-2: NA	Nonsense_Mutation	SNP	Diploid	1	NA	NA	NA	4	69978239	69978239	C	T	4:g.69978239C>T	ENST00000305231.7:c.1375C>T							3177	44718	2.47737e-05		rs770419807			CCLE	NIBRI		ACH-000971	colon_carcinoma			Caucasian	0.082		0			Carcinoma	NS
Cancer Cell Line Encyclopedia (Broad, 2019)	3A1	HCT15_LARGE_INTESTINE	Colorectal Cancer	Colorectal Adenocarcinoma	Q414H	OncoKB: NA;CIViC: NA;MyCancerGenome: not present;CancerHotspot: no;3DHotspot: no	SIFT: impact: tolerated, score: 0.07;Polyphen-2: impact: benign, score: 0.1	Missense_Mutation	SNP	Diploid		NA	NA	NA	5	35955800	35955800	C	A	5:g.35955800C>A	ENST00000274278.3:c.1242G>T							7742	44748						CCLE	NIBRI		ACH-000997	colon_cancer	36.2		Caucasian	0.0269		0			Carcinoma	adenocarcinoma
Cancer Cell Line Encyclopedia (Broad, 2019)	1A8	HEC1_ENDOMETRIUM	Cancer of Unknown Primary	Cancer of Unknown Primary	R131*	OncoKB: NA;CIViC: NA;MyCancerGenome: not present;CancerHotspot: no;3DHotspot: no	SIFT: NA;Polyphen-2: NA	Nonsense_Mutation	SNP			NA	NA	NA	2	234526744	234526744	C	T	2:g.234526744C>T	ENST00000373450.4:c.391C>T							3673	44682									ACH-001517
Cancer Cell Line Encyclopedia (Broad, 2019)	1A1	HEC108_ENDOMETRIUM	Endometrial Cancer	Endometrial Carcinoma	M213I	OncoKB: NA;CIViC: NA;MyCancerGenome: not present;CancerHotspot: no;3DHotspot: no	SIFT: NA;Polyphen-2: NA	Missense_Mutation	SNP	Diploid		NA	NA	NA	2	234669572	234669572	G	A	2:g.234669572G>A	ENST00000305208.5:c.639G>A							9823	44682						CCLE	HSSRB		ACH-000990		63		Asian	0.3879		0			Carcinoma	adenocarcinoma
Cancer Cell Line Encyclopedia (Broad, 2019)	2A3	HEC151_ENDOMETRIUM	Endometrial Cancer	Endometrial Carcinoma	C154R	OncoKB: NA;CIViC: NA;MyCancerGenome: not present;CancerHotspot: no;3DHotspot: no	SIFT: impact: deleterious, score: 0.05;Polyphen-2: impact: benign, score: 0.075	Missense_Mutation	SNP	Diploid		NA	NA	NA	4	69817019	69817019	A	G	4:g.69817019A>G	ENST00000251566.4:c.460T>C							3193	44713						CCLE	HSSRB	epithelial-like	ACH-000972				Asian	0.0307		0		Eagle's minimal essential medium with 15% fetal calf serum	Carcinoma	adenocarcinoma
Cancer Cell Line Encyclopedia (Broad, 2019)	3A2	HEC1A_ENDOMETRIUM	Endometrial Cancer	Endometrial Carcinoma	R364H	OncoKB: NA;CIViC: NA;MyCancerGenome: not present;CancerHotspot: no;3DHotspot: no	SIFT: impact: tolerated, score: 0.16;Polyphen-2: impact: benign, score: 0.097	Missense_Mutation	SNP	Diploid		NA	NA	NA	5	36038103	36038103	C	T	5:g.36038103C>T	ENST00000282507.3:c.1091G>A							3429	44748	6.35058e-05		rs375117011		71	CCLE	NIBRI		ACH-000954				Asian	0.2049		0			Carcinoma	adenocarcinoma
Cancer Cell Line Encyclopedia (Broad, 2019)	1A9	HEC251_ENDOMETRIUM	Endometrial Cancer	Endometrial Carcinoma	L109F	OncoKB: NA;CIViC: NA;MyCancerGenome: not present;CancerHotspot: no;3DHotspot: no	SIFT: NA;Polyphen-2: NA	Missense_Mutation	SNP	Diploid		NA	NA	NA	2	234580907	234580907	A	C	2:g.234580907A>C	ENST00000354728.4:c.327A>C							9498	44682						CCLE	HSSRB	epithelial-like	ACH-000996	Endometrial Cancer			Asian	0.086		0	japan	Eagle's minimal essential medium with 15% fetal bovine serum	Carcinoma	adenocarcinoma
Cancer Cell Line Encyclopedia (Broad, 2019)	1A5	HEC265_ENDOMETRIUM	Endometrial Cancer	Endometrial Carcinoma	V243Rfs*21	OncoKB: NA;CIViC: NA;MyCancerGenome: not present;CancerHotspot: no;3DHotspot: no	SIFT: NA;Polyphen-2: NA	Frame_Shift_Ins	INS	Diploid		NA	NA	NA	2	234622355	234622356	-	AG	2:g.234622355_234622356insAG	ENST00000373414.3:c.725_726dup							2190	44682						CCLE	HSSRB	epithelial-like	ACH-000946				Asian	0.0328		0		Eagle's minimal essential medium with 15% fetal bovine serum	Carcinoma	adenocarcinoma
Cancer Cell Line Encyclopedia (Broad, 2019)	1A E2-5	HEC59_ENDOMETRIUM	Endometrial Cancer	Endometrial Carcinoma	R522Efs*22	OncoKB: NA;CIViC: NA;MyCancerGenome: not present;CancerHotspot: no;3DHotspot: no	SIFT: NA;Polyphen-2: NA	Frame_Shift_Del	DEL	Diploid	2	NA	NA	NA	2	234681161	234681161	A	-	2:g.234681161del	ENST00000305139.6:c.1560del							7277	44686						CCLE	HSSRB	epithelial-like	ACH-000994				Asian	0.2823		0	japan	Eagle's minimal essential medium with 15% fetal calf serum	Carcinoma	adenocarcinoma
Cancer Cell Line Encyclopedia (Broad, 2019)	1A7	HEC6_ENDOMETRIUM	Endometrial Cancer	Endometrial Carcinoma	V145A	OncoKB: NA;CIViC: NA;MyCancerGenome: not present;CancerHotspot: no;3DHotspot: no	SIFT: NA;Polyphen-2: NA	Missense_Mutation	SNP	Diploid		NA	NA	NA	2	234591017	234591017	T	C	2:g.234591017T>C	ENST00000373426.3:c.434T>C							4719	44682						CCLE	HSSRB	epithelial-like	ACH-000984				Asian	0.4625		0		Eagle's minimal essential medium with 15% fetal calf serum	Carcinoma	adenocarcinoma
Cancer Cell Line Encyclopedia (Broad, 2019)	2B10	HELA_CERVIX	Cancer of Unknown Primary	Cancer of Unknown Primary	R468H	OncoKB: NA;CIViC: NA;MyCancerGenome: not present;CancerHotspot: no;3DHotspot: no	SIFT: impact: deleterious, score: 0.04;Polyphen-2: impact: benign, score: 0.178	Missense_Mutation	SNP		2	NA	NA	NA	4	69696413	69696413	G	A	4:g.69696413G>A	ENST00000265403.7:c.1403G>A							257	44718									ACH-001086
Cancer Cell Line Encyclopedia (Broad, 2019)	1A E2-5	HEP3B217_LIVER	Hepatobiliary Cancer	Hepatocellular Carcinoma	I313V	OncoKB: NA;CIViC: NA;MyCancerGenome: not present;CancerHotspot: no;3DHotspot: no	SIFT: impact: deleterious, score: 0.03;Polyphen-2: impact: possibly_damaging, score: 0.829	Missense_Mutation	SNP	Diploid		NA	NA	NA	2	234675755	234675755	A	G	2:g.234675755A>G	ENST00000305139.6:c.937A>G							251	44683					8	CCLE		adherent	ACH-000625	hepatocellular_cancer			African_american	0.556	5%DMSO	1		EMEM+10%FBS	Carcinoma	hepatocellular_carcinoma
Cancer Cell Line Encyclopedia (Broad, 2019)	UGT8	HO1U1_UPPER_AERODIGESTIVE_TRACT	Cancer of Unknown Primary	Cancer of Unknown Primary	A457D	OncoKB: NA;CIViC: NA;MyCancerGenome: not present;CancerHotspot: no;3DHotspot: no	SIFT: impact: deleterious, score: 0;Polyphen-2: impact: probably_damaging, score: 0.995	Missense_Mutation	SNP			NA	NA	NA	4	115597188	115597188	C	A	4:g.115597188C>A	ENST00000310836.6:c.1370C>A							316	44718									ACH-002045
Cancer Cell Line Encyclopedia (Broad, 2019)	3A1	HOP62_LUNG	Non-Small Cell Lung Cancer	Non-Small Cell Lung Cancer	V201M	OncoKB: NA;CIViC: NA;MyCancerGenome: not present;CancerHotspot: no;3DHotspot: no	SIFT: impact: tolerated, score: 0.1;Polyphen-2: impact: possibly_damaging, score: 0.457	Missense_Mutation	SNP	Diploid		NA	NA	NA	5	35965730	35965730	C	T	5:g.35965730C>T	ENST00000274278.3:c.601G>A							532	44746						CCLE	Garraway Lab	Adherent	ACH-000861		37.8		Caucasian	0.5961	5% DMSO			RPMI-1640+ 5% FBS	Carcinoma	adenocarcinoma
Cancer Cell Line Encyclopedia (Broad, 2019)	3A1	HOP92_LUNG	Non-Small Cell Lung Cancer	Non-Small Cell Lung Cancer	Y139S	OncoKB: NA;CIViC: NA;MyCancerGenome: not present;CancerHotspot: no;3DHotspot: no	SIFT: impact: deleterious, score: 0;Polyphen-2: impact: benign, score: 0.405	Missense_Mutation	SNP	Diploid		NA	NA	NA	5	35965915	35965915	T	G	5:g.35965915T>G	ENST00000274278.3:c.416A>C							434	44746						CCLE	Garraway Lab	Mix	ACH-000825		122.2		Caucasian	0.5254	5% DMSO			RPMI-1640+ 5% FBS	Carcinoma	large_cell_carcinoma
Cancer Cell Line Encyclopedia (Broad, 2019)	2B4	HPBALL_HAEMATOPOIETIC_AND_LYMPHOID_TISSUE	T-Lymphoblastic Leukemia/Lymphoma	T-Lymphoblastic Leukemia/Lymphoma	T423I	OncoKB: NA;CIViC: NA;MyCancerGenome: not present;CancerHotspot: no;3DHotspot: no	SIFT: impact: deleterious, score: 0.03;Polyphen-2: impact: benign, score: 0.1	Missense_Mutation	SNP	Diploid		NA	NA	NA	4	70350968	70350968	G	A	4:g.70350968G>A	ENST00000305107.6:c.1268C>T							1559	44717					14	CCLE	DSMZ	rond or polymorph cells growing singly or in clusters in suspentipn	ACH-000942	TALL		~ 50 hrs	Asian	0.0918		0	japan	80-90% RPMI 1640 +10-20% h.i. FBS	Lymphoid_Neoplasm	acute_lymphoblastic_T_cell_leukaemia
Cancer Cell Line Encyclopedia (Broad, 2019)	2B17	HS229T_FIBROBLAST	Non-Small Cell Lung Cancer	Non-Small Cell Lung Cancer	R339K	OncoKB: NA;CIViC: NA;MyCancerGenome: not present;CancerHotspot: no;3DHotspot: no	SIFT: impact: tolerated, score: 0.06;Polyphen-2: impact: possibly_damaging, score: 0.505	Missense_Mutation	SNP			NA	NA	NA	4	69417619	69417619	C	T	4:g.69417619C>T	ENST00000317746.2:c.1016G>A							104	44716					65	CCLE	ATCC	Adherent	ACH-000131		467.4		Caucasian		5%DMSO	0		RPMI+10%FBS	Carcinoma	adenocarcinoma
Cancer Cell Line Encyclopedia (Broad, 2019)	1A3	HS294T_SKIN	Melanoma	Cutaneous Melanoma	R49Q	OncoKB: NA;CIViC: NA;MyCancerGenome: not present;CancerHotspot: no;3DHotspot: no	SIFT: NA;Polyphen-2: NA	Missense_Mutation	SNP	Diploid		NA	NA	NA	2	234637918	234637918	G	A	2:g.234637918G>A	ENST00000482026.1:c.146G>A							545	44682					56	CCLE	ATCC	Adherent	ACH-000014	melanoma	67.5		Caucasian	0.3612	5%DMSO	1		DMEM +10%FBS	Malignant_Melanoma	NS
Cancer Cell Line Encyclopedia (Broad, 2019)	2B28	HS616T_FIBROBLAST	Hodgkin Lymphoma	Hodgkin Lymphoma	M316R	OncoKB: NA;CIViC: NA;MyCancerGenome: not present;CancerHotspot: no;3DHotspot: no	SIFT: impact: deleterious, score: 0;Polyphen-2: impact: possibly_damaging, score: 0.6	Missense_Mutation	SNP		1	NA	NA	NA	4	70152546	70152546	T	G	4:g.70152546T>G	ENST00000335568.5:c.947T>G							95	44715					16	CCLE		Adherent	ACH-000063				Caucasian		5%DMSO	0		DMEM + 10% FBS	Lymphoid_Neoplasm	Hodgkin_lymphoma
Cancer Cell Line Encyclopedia (Broad, 2019)	1A1	HS675T_FIBROBLAST	Colorectal Cancer	Colorectal Adenocarcinoma	D103V	OncoKB: NA;CIViC: NA;MyCancerGenome: not present;CancerHotspot: no;3DHotspot: no	SIFT: NA;Polyphen-2: NA	Missense_Mutation	SNP		1	NA	NA	NA	2	234669241	234669241	A	T	2:g.234669241A>T	ENST00000305208.5:c.308A>T							126	44682						CCLE	NIBRI		ACH-000214				Caucasian			0			Carcinoma	NS
Cancer Cell Line Encyclopedia (Broad, 2019)	2B15	HS683_CENTRAL_NERVOUS_SYSTEM	Glioma	Glioblastoma Multiforme	G100D	OncoKB: NA;CIViC: NA;MyCancerGenome: not present;CancerHotspot: no;3DHotspot: no	SIFT: impact: tolerated, score: 0.67;Polyphen-2: impact: benign, score: 0	Missense_Mutation	SNP	Diploid		NA	NA	NA	4	69536038	69536038	C	T	4:g.69536038C>T	ENST00000338206.5:c.299G>A							163	44713	3.9985e-06		rs1341869932		76	CCLE	NIBRI		ACH-000067				Caucasian	0.2891		0			Glioma	NS
Cancer Cell Line Encyclopedia (Broad, 2019)	2B4	HS746T_STOMACH	Esophagogastric Cancer	Esophageal Squamous Cell Carcinoma	L288I	OncoKB: NA;CIViC: NA;MyCancerGenome: not present;CancerHotspot: no;3DHotspot: no	SIFT: impact: deleterious, score: 0;Polyphen-2: impact: probably_damaging, score: 0.97	Missense_Mutation	SNP	Diploid		NA	NA	NA	4	70359419	70359419	G	T	4:g.70359419G>T	ENST00000305107.6:c.862C>A							466	44714					74	CCLE	NIBRI		ACH-000616				Caucasian	0.6539		2			Carcinoma	NS
Cancer Cell Line Encyclopedia (Broad, 2019)	2B11	HS766T_PANCREAS	Pancreatic Cancer	Pancreatic Adenocarcinoma	G523W	OncoKB: NA;CIViC: NA;MyCancerGenome: not present;CancerHotspot: no;3DHotspot: no	SIFT: impact: deleterious, score: 0;Polyphen-2: impact: possibly_damaging, score: 0.886	Missense_Mutation	SNP	Diploid		NA	NA	NA	4	70066181	70066181	C	A	4:g.70066181C>A	ENST00000446444.1:c.1567G>T							216	44718					46	CCLE	NIBRI		ACH-000178				Caucasian	0.6921		1			Carcinoma	ductal_carcinoma
Cancer Cell Line Encyclopedia (Broad, 2019)	2B10	HS852T_SKIN	Melanoma	Cutaneous Melanoma	G184E	OncoKB: NA;CIViC: NA;MyCancerGenome: not present;CancerHotspot: no;3DHotspot: no	SIFT: impact: deleterious, score: 0.01;Polyphen-2: impact: probably_damaging, score: 0.919	Missense_Mutation	SNP		2	NA	NA	NA	4	69682288	69682288	G	A	4:g.69682288G>A	ENST00000265403.7:c.551G>A							198	44713						CCLE		ADHRENT EPITHELIAL	ACH-000274		74.3		Asian	0.2292	5%DMSO	0		DMEM+10% FBS	Malignant_Melanoma	NS
Cancer Cell Line Encyclopedia (Broad, 2019)	2B7	HS870T_FIBROBLAST	Bone Cancer	Osteosarcoma	M406L	OncoKB: NA;CIViC: NA;MyCancerGenome: not present;CancerHotspot: no;3DHotspot: no	SIFT: impact: deleterious, score: 0.05;Polyphen-2: impact: benign, score: 0.017	Missense_Mutation	SNP			NA	NA	NA	4	69973946	69973946	A	C	4:g.69973946A>C	ENST00000305231.7:c.1216A>C							134	44717	4.24373e-05		rs763316866			CCLE	GNF		ACH-000340				Caucasian			0			Osteosarcoma	NS
Cancer Cell Line Encyclopedia (Broad, 2019)	1A3	HS936T_SKIN	Melanoma	Cutaneous Melanoma	D179N	OncoKB: NA;CIViC: NA;MyCancerGenome: not present;CancerHotspot: no;3DHotspot: no	SIFT: NA;Polyphen-2: NA	Missense_Mutation	SNP	Diploid		NA	NA	NA	2	234638307	234638307	G	A	2:g.234638307G>A	ENST00000482026.1:c.535G>A							536	44682						CCLE	GNF		ACH-000801				Caucasian	0.4411					Malignant_Melanoma	NS
Cancer Cell Line Encyclopedia (Broad, 2019)	2B15	HS939T_SKIN	Melanoma	Cutaneous Melanoma	D95N	OncoKB: NA;CIViC: NA;MyCancerGenome: not present;CancerHotspot: no;3DHotspot: no	SIFT: impact: tolerated, score: 1;Polyphen-2: impact: benign, score: 0.003	Missense_Mutation	SNP	Diploid		NA	NA	NA	4	69536054	69536054	C	T	4:g.69536054C>T	ENST00000338206.5:c.283G>A							541	44713	2.40423e-05		rs767748124		24	CCLE		Large adherent cells, quite a bit of debris	ACH-000814				Caucasian	0.2322	5%DMSO			DEMEM+10%FBS	Malignant_Melanoma	NS
Cancer Cell Line Encyclopedia (Broad, 2019)	2B4	HS944T_SKIN	Melanoma	Cutaneous Melanoma	G387R	OncoKB: NA;CIViC: NA;MyCancerGenome: not present;CancerHotspot: no;3DHotspot: no	SIFT: impact: deleterious, score: 0.02;Polyphen-2: impact: probably_damaging, score: 1	Missense_Mutation	SNP	Diploid	1	NA	NA	NA	4	70351077	70351077	C	T	4:g.70351077C>T	ENST00000305107.6:c.1159G>A							321	44717					51	CCLE	NIBRI		ACH-000632				Caucasian	0.4506		1			Malignant_Melanoma	NS
Cancer Cell Line Encyclopedia (Broad, 2019)	UGT8	HSC2_UPPER_AERODIGESTIVE_TRACT	Esophagogastric Cancer	Esophageal Poorly Differentiated Carcinoma	L300M	OncoKB: NA;CIViC: NA;MyCancerGenome: not present;CancerHotspot: no;3DHotspot: no	SIFT: impact: deleterious, score: 0;Polyphen-2: impact: possibly_damaging, score: 0.475	Missense_Mutation	SNP	Diploid		NA	NA	NA	4	115585226	115585226	C	A	4:g.115585226C>A	ENST00000310836.6:c.898C>A							402	44715					69	CCLE	HSSRB	Epithelial-like	ACH-000472		37.7		Asian	0.6956		1		EMEM+10%FBS	Carcinoma	squamous_cell_carcinoma
Cancer Cell Line Encyclopedia (Broad, 2019)	2B10	HT_HAEMATOPOIETIC_AND_LYMPHOID_TISSUE	B-Lymphoblastic Leukemia/Lymphoma	B-Lymphoblastic Leukemia/Lymphoma	X289_splice	OncoKB: NA;CIViC: NA;MyCancerGenome: not present;CancerHotspot: no;3DHotspot: no	SIFT: NA;Polyphen-2: NA	Splice_Site	SNP			NA	NA	NA	4	69683897	69683897	T	C	4:g.69683897T>C	ENST00000265403.7:c.867+2T>C							1809						70	CCLE	NIBRI		ACH-000914				Caucasian	0.1163		0			Lymphoid_Neoplasm	B_cell_lymphoma_unspecified
Cancer Cell Line Encyclopedia (Broad, 2019)	2A E2-6	HT115_LARGE_INTESTINE	Colorectal Cancer	Colorectal Adenocarcinoma	E301*	OncoKB: NA;CIViC: NA;MyCancerGenome: not present;CancerHotspot: no;3DHotspot: no	SIFT: NA;Polyphen-2: NA	Nonsense_Mutation	SNP	Diploid		NA	NA	NA	4	70462090	70462090	C	A	4:g.70462090C>A	ENST00000457664.2:c.901G>T							5727	44715						CCLE	ECACC	Epithelial adherent	ACH-000986		90.6		Caucasian	0.1873	?	0		DMEM+15%FBS	Carcinoma	NS
Cancer Cell Line Encyclopedia (Broad, 2019)	1A9	HT29_LARGE_INTESTINE	Colorectal Cancer	Colorectal Adenocarcinoma	L173R	OncoKB: NA;CIViC: NA;MyCancerGenome: not present;CancerHotspot: no;3DHotspot: no	SIFT: NA;Polyphen-2: NA	Missense_Mutation	SNP	Diploid		NA	NA	NA	2	234581098	234581098	T	G	2:g.234581098T>G	ENST00000354728.4:c.518T>G							416	44682					44	CCLE	NIBRI		ACH-000552	colon_cancer			Caucasian	0.4374		1			Carcinoma	adenocarcinoma
Cancer Cell Line Encyclopedia (Broad, 2019)	3A1	HT3_CERVIX	Cancer of Unknown Primary	Cancer of Unknown Primary	F210L	OncoKB: NA;CIViC: NA;MyCancerGenome: not present;CancerHotspot: no;3DHotspot: no	SIFT: impact: tolerated, score: 0.35;Polyphen-2: impact: benign, score: 0.034	Missense_Mutation	SNP			NA	NA	NA	5	35965701	35965701	G	T	5:g.35965701G>T	ENST00000274278.3:c.630C>A							377	44746									ACH-001525
Cancer Cell Line Encyclopedia (Broad, 2019)	3A2	HT55_LARGE_INTESTINE	Colorectal Cancer	Colorectal Adenocarcinoma	K72*	OncoKB: NA;CIViC: NA;MyCancerGenome: not present;CancerHotspot: no;3DHotspot: no	SIFT: NA;Polyphen-2: NA	Nonsense_Mutation	SNP	Diploid		NA	NA	NA	5	36052069	36052069	T	A	5:g.36052069T>A	ENST00000282507.3:c.214A>T							1114	44745						CCLE	ECACC		ACH-000926				Caucasian	0.5524		0			Carcinoma	adenocarcinoma
Cancer Cell Line Encyclopedia (Broad, 2019)	2B11	HUH6_LIVER	Hepatobiliary Cancer	Hepatocellular Carcinoma	N260K	OncoKB: NA;CIViC: NA;MyCancerGenome: not present;CancerHotspot: no;3DHotspot: no	SIFT: impact: deleterious, score: 0.01;Polyphen-2: impact: benign, score: 0.007	Missense_Mutation	SNP	Diploid		NA	NA	NA	4	70078381	70078381	G	T	4:g.70078381G>T	ENST00000446444.1:c.780C>A							355	44714						CCLE	RIKEN	epithelial-like	ACH-000671				Asian	0.5928		0	japan	DMEM + 10%FBS	Other	hepatoblastoma
Cancer Cell Line Encyclopedia (Broad, 2019)	2B11	HUH6CLONE5_LIVER	Mixed Cancer Types	Mixed Cancer Types	N260K	OncoKB: NA;CIViC: NA;MyCancerGenome: not present;CancerHotspot: no;3DHotspot: no	SIFT: impact: deleterious, score: 0.01;Polyphen-2: impact: benign, score: 0.007	Missense_Mutation	SNP			NA	NA	NA	4	70078381	70078381	G	T	4:g.70078381G>T	ENST00000446444.1:c.780C>A							320	44714
Cancer Cell Line Encyclopedia (Broad, 2019)	2B28	HUNS1_HAEMATOPOIETIC_AND_LYMPHOID_TISSUE	Mature B-Cell Neoplasms	Plasma Cell Myeloma	S171N	OncoKB: NA;CIViC: NA;MyCancerGenome: not present;CancerHotspot: no;3DHotspot: no	SIFT: impact: deleterious, score: 0;Polyphen-2: impact: benign, score: 0.378	Missense_Mutation	SNP	Diploid		NA	NA	NA	4	70146730	70146730	G	A	4:g.70146730G>A	ENST00000335568.5:c.512G>A							678	44713						CCLE	NIBRI		ACH-000829	myeloma			Caucasian	0.0482		0			Lymphoid_Neoplasm	plasma_cell_myeloma
Cancer Cell Line Encyclopedia (Broad, 2019)	2B10	IALM_LUNG	Non-Small Cell Lung Cancer	Non-Small Cell Lung Cancer	L490S	OncoKB: NA;CIViC: NA;MyCancerGenome: not present;CancerHotspot: no;3DHotspot: no	SIFT: impact: deleterious, score: 0;Polyphen-2: impact: probably_damaging, score: 0.992	Missense_Mutation	SNP			NA	NA	NA	4	69696479	69696479	T	C	4:g.69696479T>C	ENST00000265403.7:c.1469T>C							474	44718					68	CCLE	RIKEN	ADHERENT EPITHELIAL;	ACH-000672		143.2		Asian	0.6777	5% DMSO	1	japan	HAMSF10+ 10% FBS	Carcinoma	large_cell_carcinoma
Cancer Cell Line Encyclopedia (Broad, 2019)	1A E2-5	IGR1_SKIN	Melanoma	Cutaneous Melanoma	I349L	OncoKB: NA;CIViC: NA;MyCancerGenome: not present;CancerHotspot: no;3DHotspot: no	SIFT: impact: tolerated, score: 0.07;Polyphen-2: impact: benign, score: 0.411	Missense_Mutation	SNP	Diploid		NA	NA	NA	2	234676546	234676546	A	C	2:g.234676546A>C	ENST00000305139.6:c.1045A>C							1157	44684					42	CCLE		Epithelial adherent	ACH-000882		46.3		Caucasian	0.5209	5%DMSO	1		DMEM + 10% FBS	Malignant_Melanoma	NS
Cancer Cell Line Encyclopedia (Broad, 2019)	2B28	IGR37_SKIN	Melanoma	Cutaneous Melanoma	F516I	OncoKB: NA;CIViC: NA;MyCancerGenome: not present;CancerHotspot: no;3DHotspot: no	SIFT: impact: tolerated, score: 0.1;Polyphen-2: impact: benign, score: 0.365	Missense_Mutation	SNP	Diploid		NA	NA	NA	4	70160483	70160483	T	A	4:g.70160483T>A	ENST00000335568.5:c.1546T>A							373	44718					26	CCLE	NIBRI		ACH-000650	Skin Cancer	39.4		Caucasian	0.7139		0			Malignant_Melanoma	NS
Cancer Cell Line Encyclopedia (Broad, 2019)	2B4	IGR39_SKIN	Melanoma	Cutaneous Melanoma	E181K	OncoKB: NA;CIViC: NA;MyCancerGenome: not present;CancerHotspot: no;3DHotspot: no	SIFT: impact: deleterious, score: 0.01;Polyphen-2: impact: probably_damaging, score: 0.99	Missense_Mutation	SNP	Diploid	1	NA	NA	NA	4	70361039	70361039	C	T	4:g.70361039C>T	ENST00000305107.6:c.541G>A							380	44713					26	CCLE	DSMZ	Adherent	ACH-000550	Skin Cancer	40.2		Caucasian	0.6213	5% DMSO	0		DMEM+15%FBS	Malignant_Melanoma	NS
Cancer Cell Line Encyclopedia (Broad, 2019)	3A1	IGROV1_OVARY	Ovarian Cancer	Ovarian Carcinosarcoma/Malignant Mixed Mesodermal Tumor	P82H	OncoKB: NA;CIViC: NA;MyCancerGenome: not present;CancerHotspot: no;3DHotspot: no	SIFT: impact: deleterious, score: 0.02;Polyphen-2: impact: benign, score: 0.14	Missense_Mutation	SNP	Diploid	1	NA	NA	NA	5	35968187	35968187	G	T	5:g.35968187G>T	ENST00000274278.3:c.245C>A							3072	44745					47	CCLE	NCI/DCTD		ACH-000966	ovarian_cancer	43.3		Caucasian	0.1248	5%DMSO	0		RPMI-1640 + 10% FBS	Carcinoma	adenocarcinoma
Cancer Cell Line Encyclopedia (Broad, 2019)	2B7	IM9_HAEMATOPOIETIC_AND_LYMPHOID_TISSUE	Cancer of Unknown Primary	Cancer of Unknown Primary	D65Y	OncoKB: NA;CIViC: NA;MyCancerGenome: not present;CancerHotspot: no;3DHotspot: no	SIFT: impact: deleterious, score: 0.01;Polyphen-2: impact: possibly_damaging, score: 0.882	Missense_Mutation	SNP			NA	NA	NA	4	69962431	69962431	G	T	4:g.69962431G>T	ENST00000305231.7:c.193G>T							176	44713									ACH-002247
Cancer Cell Line Encyclopedia (Broad, 2019)	1A8	IM95_STOMACH	Esophagogastric Cancer	Esophageal Squamous Cell Carcinoma	S122Rfs*12	OncoKB: NA;CIViC: NA;MyCancerGenome: not present;CancerHotspot: no;3DHotspot: no	SIFT: NA;Polyphen-2: NA	Frame_Shift_Del	DEL	Diploid		NA	NA	NA	2	234526711	234526711	T	-	2:g.234526711del	ENST00000373450.4:c.364del							1818	44682					63	CCLE	HSRRB	Adherent	ACH-000919		40.2		Asian	0.148	5% DMSO	0	japan	DMEM +10%FBS	Carcinoma	intestinal_adenocarcinoma
Cancer Cell Line Encyclopedia (Broad, 2019)	UGT8	IMR32_AUTONOMIC_GANGLIA	Neuroblastoma	Peripheral Nervous System	I534S	OncoKB: NA;CIViC: NA;MyCancerGenome: not present;CancerHotspot: no;3DHotspot: no	SIFT: impact: deleterious_low_confidence, score: 0.01;Polyphen-2: impact: benign, score: 0.059	Missense_Mutation	SNP	Diploid		NA	NA	NA	4	115597419	115597419	T	G	4:g.115597419T>G	ENST00000310836.6:c.1601T>G							106	44718					1	CCLE	NIBRI		ACH-000310	neuroblastoma			Caucasian	0.281		0			Neuroblastoma	NS
Cancer Cell Line Encyclopedia (Broad, 2019)	UGT8	IMR5_AUTONOMIC_GANGLIA	Cancer of Unknown Primary	Cancer of Unknown Primary	I534S	OncoKB: NA;CIViC: NA;MyCancerGenome: not present;CancerHotspot: no;3DHotspot: no	SIFT: impact: deleterious_low_confidence, score: 0.01;Polyphen-2: impact: benign, score: 0.059	Missense_Mutation	SNP			NA	NA	NA	4	115597419	115597419	T	G	4:g.115597419T>G	ENST00000310836.6:c.1601T>G							251	44718									ACH-002248
Cancer Cell Line Encyclopedia (Broad, 2019)	1A3	IPC298_SKIN	Melanoma	Cutaneous Melanoma	R241K	OncoKB: NA;CIViC: NA;MyCancerGenome: not present;CancerHotspot: no;3DHotspot: no	SIFT: NA;Polyphen-2: NA	Missense_Mutation	SNP	Diploid		NA	NA	NA	2	234638494	234638494	G	A	2:g.234638494G>A	ENST00000482026.1:c.722G>A							1065	44682					64	CCLE	DSMZ	Adherent	ACH-000915		29	30 hrs	Caucasian	0.3823	5% DMSO	1		RPMI 1640+10%FBS	Malignant_Melanoma	NS
Cancer Cell Line Encyclopedia (Broad, 2019)	1A E2-5	ISHIKAWAHERAKLIO02ER_ENDOMETRIUM	Endometrial Cancer	Endometrial Carcinoma	R522Efs*22	OncoKB: NA;CIViC: NA;MyCancerGenome: not present;CancerHotspot: no;3DHotspot: no	SIFT: NA;Polyphen-2: NA	Frame_Shift_Del	DEL	Diploid	2	NA	NA	NA	2	234681161	234681161	A	-	2:g.234681161del	ENST00000305139.6:c.1560del							2745	44686					39	CCLE			ACH-000961	well differentiated endometrial adenocarcinoma			Asian	0.1232		0			Carcinoma	adenocarcinoma
Cancer Cell Line Encyclopedia (Broad, 2019)	3A2	JAR_PLACENTA	Cancer of Unknown Primary	Cancer of Unknown Primary	K289Q	OncoKB: NA;CIViC: NA;MyCancerGenome: not present;CancerHotspot: no;3DHotspot: no	SIFT: impact: tolerated, score: 0.25;Polyphen-2: impact: benign, score: 0.047	Missense_Mutation	SNP		2	NA	NA	NA	5	36039789	36039789	T	G	5:g.36039789T>G	ENST00000282507.3:c.865A>C							567	44747									ACH-001529
Cancer Cell Line Encyclopedia (Broad, 2019)	2B7	JEG3_PLACENTA	Cancer of Unknown Primary	Cancer of Unknown Primary	R447I	OncoKB: NA;CIViC: NA;MyCancerGenome: not present;CancerHotspot: no;3DHotspot: no	SIFT: impact: deleterious, score: 0.03;Polyphen-2: impact: benign, score: 0.018	Missense_Mutation	SNP			NA	NA	NA	4	69978204	69978204	G	T	4:g.69978204G>T	ENST00000305231.7:c.1340G>T							452	44718			rs1466161223						ACH-001530
Cancer Cell Line Encyclopedia (Broad, 2019)	1A7	JHH4_LIVER	Hepatobiliary Cancer	Hepatocellular Carcinoma	R68K	OncoKB: NA;CIViC: NA;MyCancerGenome: not present;CancerHotspot: no;3DHotspot: no	SIFT: NA;Polyphen-2: NA	Missense_Mutation	SNP	Diploid		NA	NA	NA	2	234590786	234590786	G	A	2:g.234590786G>A	ENST00000373426.3:c.203G>A							306	44682					51	CCLE	HSRRB	Epithelial-like	ACH-000476		85.2		Asian	0.48		1	japan	EMEM +10 % FBS	Carcinoma	hepatocellular_carcinoma
Cancer Cell Line Encyclopedia (Broad, 2019)	2B28	JHH7_LIVER	Hepatobiliary Cancer	Hepatocellular Carcinoma	V507I	OncoKB: NA;CIViC: NA;MyCancerGenome: not present;CancerHotspot: no;3DHotspot: no	SIFT: impact: tolerated, score: 0.85;Polyphen-2: impact: benign, score: 0.001	Missense_Mutation	SNP	Diploid		NA	NA	NA	4	70160456	70160456	G	A	4:g.70160456G>A	ENST00000335568.5:c.1519G>A							796	44718					53	CCLE	NIBRI		ACH-000848				Asian	0.4552		1	japan		Carcinoma	hepatocellular_carcinoma
Cancer Cell Line Encyclopedia (Broad, 2019)	3A2	JHOC5_OVARY	Ovarian Cancer	Ovarian Carcinosarcoma/Malignant Mixed Mesodermal Tumor	D292N	OncoKB: NA;CIViC: NA;MyCancerGenome: not present;CancerHotspot: no;3DHotspot: no	SIFT: impact: deleterious, score: 0.01;Polyphen-2: impact: benign, score: 0.314	Missense_Mutation	SNP	Diploid		NA	NA	NA	5	36039780	36039780	C	T	5:g.36039780C>T	ENST00000282507.3:c.874G>A							217	44747						CCLE	RIKEN	epithelial-like	ACH-000324				Asian	0.6831		1		(DMEM: HamF12=1:1) +10%FBS	Carcinoma	clear_cell_carcinoma
Cancer Cell Line Encyclopedia (Broad, 2019)	1A9	JHOM1_OVARY	Ovarian Cancer	Ovarian Carcinosarcoma/Malignant Mixed Mesodermal Tumor	L173R	OncoKB: NA;CIViC: NA;MyCancerGenome: not present;CancerHotspot: no;3DHotspot: no	SIFT: NA;Polyphen-2: NA	Missense_Mutation	SNP	Diploid		NA	NA	NA	2	234581098	234581098	T	G	2:g.234581098T>G	ENST00000354728.4:c.518T>G							140	44682						CCLE	RIKEN	ADHERENT; EPITHELIAL-LIKE	ACH-000237		60		Asian	0.7673	5%DMSO	1		DMEM:F12+10% FBS	Carcinoma	adenocarcinoma
Cancer Cell Line Encyclopedia (Broad, 2019)	1A10	JHOS4_OVARY	Ovarian Cancer	Ovarian Carcinosarcoma/Malignant Mixed Mesodermal Tumor	M285V	OncoKB: NA;CIViC: NA;MyCancerGenome: not present;CancerHotspot: no;3DHotspot: no	SIFT: impact: deleterious, score: 0.01;Polyphen-2: impact: benign, score: 0.057	Missense_Mutation	SNP	Diploid		NA	NA	NA	2	234546021	234546021	A	G	2:g.234546021A>G	ENST00000344644.5:c.853A>G							360	44682	1.06909e-05		rs761082067		44	CCLE	RIKEN		ACH-000584		127.3		Asian	0.7144	5% DMSO	0		DMEM:F12 + 10% FBS	Carcinoma	adenocarcinoma
Cancer Cell Line Encyclopedia (Broad, 2019)	2B10	JHU011_UPPER_AERODIGESTIVE_TRACT	Cancer of Unknown Primary	Cancer of Unknown Primary	X436_splice	OncoKB: NA;CIViC: NA;MyCancerGenome: not present;CancerHotspot: no;3DHotspot: no	SIFT: NA;Polyphen-2: NA	Splice_Site	SNP			NA	NA	NA	4	69693267	69693267	G	C	4:g.69693267G>C	ENST00000265403.7:c.1307+1G>C							209										ACH-002249
Cancer Cell Line Encyclopedia (Broad, 2019)	1A10	JHU028_LUNG	Mixed Cancer Types	Mixed Cancer Types	E54K	OncoKB: NA;CIViC: NA;MyCancerGenome: not present;CancerHotspot: no;3DHotspot: no	SIFT: impact: tolerated, score: 0.05;Polyphen-2: impact: benign, score: 0.308	Missense_Mutation	SNP			NA	NA	NA	2	234545328	234545328	G	A	2:g.234545328G>A	ENST00000344644.5:c.160G>A							555	44682
Cancer Cell Line Encyclopedia (Broad, 2019)	1A9	JHUEM1_ENDOMETRIUM	Endometrial Cancer	Endometrial Carcinoma	D148N	OncoKB: NA;CIViC: NA;MyCancerGenome: not present;CancerHotspot: no;3DHotspot: no	SIFT: NA;Polyphen-2: NA	Missense_Mutation	SNP	Diploid	5	NA	NA	NA	2	234581022	234581022	G	A	2:g.234581022G>A	ENST00000354728.4:c.442G>A							1916	44682					56	CCLE	RIKEN	adherent with some suspension cells	ACH-000928	Endometrial Cancer	288.6		Asian	0.0806	5% DMSO	0	japan	DMEM:F12(1:1) +15%FBS	Carcinoma	adenocarcinoma
Cancer Cell Line Encyclopedia (Broad, 2019)	1A6	JHUEM2_ENDOMETRIUM	Endometrial Cancer	Endometrial Carcinoma	I56Dfs*7	OncoKB: NA;CIViC: NA;MyCancerGenome: not present;CancerHotspot: no;3DHotspot: no	SIFT: NA;Polyphen-2: NA	Frame_Shift_Ins	INS	Diploid		NA	NA	NA	2	234601813	234601814	-	A	2:g.234601813_234601814insA	ENST00000305139.6:c.164dup							1047	44682					62	CCLE	GNF		ACH-000909	Endometrial Cancer			Asian	0.1903		0			Carcinoma	adenocarcinoma
Cancer Cell Line Encyclopedia (Broad, 2019)	1A E2-5	JHUEM7_ENDOMETRIUM	Endometrial Cancer	Endometrial Carcinoma	D358Y	OncoKB: NA;CIViC: NA;MyCancerGenome: not present;CancerHotspot: no;3DHotspot: no	SIFT: impact: deleterious, score: 0;Polyphen-2: impact: probably_damaging, score: 0.999	Missense_Mutation	SNP	Diploid		NA	NA	NA	2	234676573	234676573	G	T	2:g.234676573G>T	ENST00000305139.6:c.1072G>T							6962	44684					58	CCLE	GNF		ACH-000993		112.7		Asian	0.0332		0	japan		Carcinoma	adenocarcinoma
Cancer Cell Line Encyclopedia (Broad, 2019)	3A1	JM1_HAEMATOPOIETIC_AND_LYMPHOID_TISSUE	B-Lymphoblastic Leukemia/Lymphoma	B-Lymphoblastic Leukemia/Lymphoma	W79*	OncoKB: NA;CIViC: NA;MyCancerGenome: not present;CancerHotspot: no;3DHotspot: no	SIFT: NA;Polyphen-2: NA	Nonsense_Mutation	SNP	Diploid		NA	NA	NA	5	35968196	35968196	C	T	5:g.35968196C>T	ENST00000274278.3:c.236G>A							192	44745						CCLE	NIBRI		ACH-000151				Caucasian	0.5463		0			Lymphoid_Neoplasm	B_cell_lymphoma_unspecified
Cancer Cell Line Encyclopedia (Broad, 2019)	1A E2-5	JSC1_HAEMATOPOIETIC_AND_LYMPHOID_TISSUE	Cancer of Unknown Primary	Cancer of Unknown Primary	I321M	OncoKB: NA;CIViC: NA;MyCancerGenome: not present;CancerHotspot: no;3DHotspot: no	SIFT: impact: deleterious, score: 0;Polyphen-2: impact: probably_damaging, score: 0.999	Missense_Mutation	SNP		1	NA	NA	NA	2	234675781	234675781	T	G	2:g.234675781T>G	ENST00000305139.6:c.963T>G							713	44683									ACH-002253
Cancer Cell Line Encyclopedia (Broad, 2019)	3A2	JURKAT_HAEMATOPOIETIC_AND_LYMPHOID_TISSUE	T-Lymphoblastic Leukemia/Lymphoma	T-Lymphoblastic Leukemia/Lymphoma	A468Rfs*15	OncoKB: NA;CIViC: NA;MyCancerGenome: not present;CancerHotspot: no;3DHotspot: no	SIFT: NA;Polyphen-2: NA	Frame_Shift_Ins	INS	Diploid		NA	NA	NA	5	36035971	36035972	-	C	5:g.36035971_36035972insC	ENST00000282507.3:c.1400dup							5726	44749					14	CCLE	DSMZ	round cells growing singly or in clumps in suspention	ACH-000995	TALL		~ 25-35 hrs	Caucasian	0.0942				90% RPMI 1640 +10% h.i.FBS	Lymphoid_Neoplasm	acute_lymphoblastic_T_cell_leukaemia
Cancer Cell Line Encyclopedia (Broad, 2019)	2B28	K029AX_SKIN	Melanoma	Cutaneous Melanoma	K343I	OncoKB: NA;CIViC: NA;MyCancerGenome: not present;CancerHotspot: no;3DHotspot: no	SIFT: impact: deleterious, score: 0.01;Polyphen-2: impact: benign, score: 0.118	Missense_Mutation	SNP	Diploid		NA	NA	NA	4	70155408	70155408	A	T	4:g.70155408A>T	ENST00000335568.5:c.1028A>T							284	44716						CCLE	Acd Lab		ACH-000404	Skin Cancer	57		Caucasian	0.3074	5% DMSO	0		RPMI-1640+10% FBS	Malignant_Melanoma	NS
Cancer Cell Line Encyclopedia (Broad, 2019)	2B28	K5_THYROID	Cancer of Unknown Primary	Cancer of Unknown Primary	A162V	OncoKB: NA;CIViC: NA;MyCancerGenome: not present;CancerHotspot: no;3DHotspot: no	SIFT: impact: deleterious, score: 0;Polyphen-2: impact: benign, score: 0.067	Missense_Mutation	SNP			NA	NA	NA	4	70146703	70146703	C	T	4:g.70146703C>T	ENST00000335568.5:c.485C>T							208	44713									ACH-002148
Cancer Cell Line Encyclopedia (Broad, 2019)	2B10	KALS1_CENTRAL_NERVOUS_SYSTEM	Glioma	Glioblastoma Multiforme	L490S	OncoKB: NA;CIViC: NA;MyCancerGenome: not present;CancerHotspot: no;3DHotspot: no	SIFT: impact: deleterious, score: 0;Polyphen-2: impact: probably_damaging, score: 0.992	Missense_Mutation	SNP			NA	NA	NA	4	69696479	69696479	T	C	4:g.69696479T>C	ENST00000265403.7:c.1469T>C							245	44718						CCLE	HSSRB	Biporar polyglonal	ACH-000231		56.9		Asian	0.6431	10%DMSO	1		RPMI1640+10%FBS	Glioma	NS
Cancer Cell Line Encyclopedia (Broad, 2019)	3A1	KARPAS231_HAEMATOPOIETIC_AND_LYMPHOID_TISSUE	Cancer of Unknown Primary	Cancer of Unknown Primary	S435L	OncoKB: NA;CIViC: NA;MyCancerGenome: not present;CancerHotspot: no;3DHotspot: no	SIFT: impact: deleterious, score: 0.03;Polyphen-2: impact: benign, score: 0.103	Missense_Mutation	SNP		1	NA	NA	NA	5	35954572	35954572	G	A	5:g.35954572G>A	ENST00000274278.3:c.1304C>T							193	44749									ACH-002255
Cancer Cell Line Encyclopedia (Broad, 2019)	2B28	KARPAS45_HAEMATOPOIETIC_AND_LYMPHOID_TISSUE	Cancer of Unknown Primary	Cancer of Unknown Primary	Y438N	OncoKB: NA;CIViC: NA;MyCancerGenome: not present;CancerHotspot: no;3DHotspot: no	SIFT: impact: deleterious, score: 0;Polyphen-2: impact: probably_damaging, score: 0.998	Missense_Mutation	SNP			NA	NA	NA	4	70160249	70160249	T	A	4:g.70160249T>A	ENST00000335568.5:c.1312T>A							5745	44718									ACH-002256
Cancer Cell Line Encyclopedia (Broad, 2019)	3A2	KASUMI2_HAEMATOPOIETIC_AND_LYMPHOID_TISSUE	Leukemia	Acute Undifferentiated Leukemia	W513G	OncoKB: NA;CIViC: NA;MyCancerGenome: not present;CancerHotspot: no;3DHotspot: no	SIFT: impact: tolerated, score: 0.11;Polyphen-2: impact: possibly_damaging, score: 0.903	Missense_Mutation	SNP	Diploid		NA	NA	NA	5	36035835	36035835	A	C	5:g.36035835A>C	ENST00000282507.3:c.1537T>G							559	44749					15	CCLE	DSMZ	small round cells growing singly or in small clumps in suspension; some loosely adherent	ACH-000728	acute lymphoblastic leukemia	48.5	30 hrs	Asian	0.134	5%DMSO	0		RPMI-1640+10% FBS	Lymphoid_Neoplasm	acute_lymphoblastic_B_cell_leukaemia
Cancer Cell Line Encyclopedia (Broad, 2019)	2B28	KCL22_HAEMATOPOIETIC_AND_LYMPHOID_TISSUE	Blood Cancer	Chronic Myelogenous Leukemia	H386D	OncoKB: NA;CIViC: NA;MyCancerGenome: not present;CancerHotspot: no;3DHotspot: no	SIFT: impact: deleterious, score: 0.01;Polyphen-2: impact: probably_damaging, score: 0.963	Missense_Mutation	SNP	Diploid	2	NA	NA	NA	4	70156375	70156375	C	G	4:g.70156375C>G	ENST00000335568.5:c.1156C>G							2360	44717					32	CCLE	DSMZ	round, single cells in suspention, sometimes in small clusters	ACH-000983			~ 24 hrs	Asian	0.2747		0		90% RPMI 1640 + 10% h. i. FBS	Haematopoietic_Neoplasm	blast_phase_chronic_myeloid_leukaemia
Cancer Cell Line Encyclopedia (Broad, 2019)	1A10	KE39_STOMACH	Esophagogastric Cancer	Esophageal Squamous Cell Carcinoma	S78*	OncoKB: NA;CIViC: NA;MyCancerGenome: not present;CancerHotspot: no;3DHotspot: no	SIFT: NA;Polyphen-2: NA	Nonsense_Mutation	SNP	Diploid		NA	NA	NA	2	234545401	234545401	C	G	2:g.234545401C>G	ENST00000344644.5:c.233C>G							408	44682	3.97807e-06		rs765888404		77	CCLE	RIKEN	Adherent	ACH-000507		92		Asian	0.6177	5% DMSO	1	japan	RPMI 1640 +10%FBS	Carcinoma	NS
Cancer Cell Line Encyclopedia (Broad, 2019)	1A10	KIJK_HAEMATOPOIETIC_AND_LYMPHOID_TISSUE	T-Lymphoblastic Leukemia/Lymphoma	T-Lymphoblastic Leukemia/Lymphoma	W251Y	OncoKB: NA;CIViC: NA;MyCancerGenome: not present;CancerHotspot: no;3DHotspot: no	SIFT: impact: deleterious, score: 0.01;Polyphen-2: impact: probably_damaging, score: 1	Missense_Mutation	DNP	Diploid		NA	NA	NA	2	234545920	234545921	GG	AT	2:g.234545920_234545921delinsAT	ENST00000344644.5:c.752_753delinsAT							606	44682					15	CCLE	HSSRB	lymphoblast-like	ACH-000773				Asian	0.4817		0		RPMI 1640 medium with 10% fetal calf serum.	Lymphoid_Neoplasm	anaplastic_large_cell_lymphoma
Cancer Cell Line Encyclopedia (Broad, 2019)	3A1	KINGS1_CENTRAL_NERVOUS_SYSTEM	Cancer of Unknown Primary	Cancer of Unknown Primary	M217T	OncoKB: NA;CIViC: NA;MyCancerGenome: not present;CancerHotspot: no;3DHotspot: no	SIFT: impact: tolerated, score: 0.09;Polyphen-2: impact: benign, score: 0.001	Missense_Mutation	SNP		1	NA	NA	NA	5	35965681	35965681	A	G	5:g.35965681A>G	ENST00000274278.3:c.650T>C							185	44746									ACH-002257
Cancer Cell Line Encyclopedia (Broad, 2019)	2B28	KLE_ENDOMETRIUM	Endometrial Cancer	Endometrial Carcinoma	L425M	OncoKB: NA;CIViC: NA;MyCancerGenome: not present;CancerHotspot: no;3DHotspot: no	SIFT: impact: deleterious, score: 0;Polyphen-2: impact: probably_damaging, score: 0.945	Missense_Mutation	SNP	Diploid		NA	NA	NA	4	70156492	70156492	C	A	4:g.70156492C>A	ENST00000335568.5:c.1273C>A							187	44717					64	CCLE	GNF		ACH-000293		70.2		Caucasian	0.811		1			Carcinoma	adenocarcinoma
Cancer Cell Line Encyclopedia (Broad, 2019)	2B17	KM12_LARGE_INTESTINE	Colorectal Cancer	Colorectal Adenocarcinoma	A60D	OncoKB: NA;CIViC: NA;MyCancerGenome: not present;CancerHotspot: no;3DHotspot: no	SIFT: impact: deleterious, score: 0.01;Polyphen-2: impact: benign, score: 0.206	Missense_Mutation	SNP	Diploid		NA	NA	NA	4	69434024	69434024	G	T	4:g.69434024G>T	ENST00000317746.2:c.179C>A							3296	44713						CCLE	NIBRI		ACH-000969	colon_cancer			Caucasian	0.1304		0			Carcinoma	adenocarcinoma
Cancer Cell Line Encyclopedia (Broad, 2019)	1A7	KMBC2_URINARY_TRACT	Bladder Cancer	Bladder Urothelial Carcinoma	R68K	OncoKB: NA;CIViC: NA;MyCancerGenome: not present;CancerHotspot: no;3DHotspot: no	SIFT: NA;Polyphen-2: NA	Missense_Mutation	SNP	Diploid		NA	NA	NA	2	234590786	234590786	G	A	2:g.234590786G>A	ENST00000373426.3:c.203G>A							579	44682						CCLE	HSRRB	round cells with vacuolization	ACH-000862		137.9		Asian	0.5823	5%DMSO	0		Ham's F12 +10% FBS	Carcinoma	NS
Cancer Cell Line Encyclopedia (Broad, 2019)	2B11	KMH2_THYROID	Cancer of Unknown Primary	Cancer of Unknown Primary	X241_splice	OncoKB: NA;CIViC: NA;MyCancerGenome: not present;CancerHotspot: no;3DHotspot: no	SIFT: NA;Polyphen-2: NA	Splice_Site	SNP			NA	NA	NA	4	70078440	70078440	C	T	4:g.70078440C>T	ENST00000446444.1:c.722-1G>A							786										ACH-002397
Cancer Cell Line Encyclopedia (Broad, 2019)	UGT8	KMM1_HAEMATOPOIETIC_AND_LYMPHOID_TISSUE	Mature B-Cell Neoplasms	Plasma Cell Myeloma	V374L	OncoKB: NA;CIViC: NA;MyCancerGenome: not present;CancerHotspot: no;3DHotspot: no	SIFT: impact: deleterious, score: 0.01;Polyphen-2: impact: benign, score: 0.401	Missense_Mutation	SNP	Diploid		NA	NA	NA	4	115589318	115589318	G	T	4:g.115589318G>T	ENST00000310836.6:c.1120G>T							939	44717					62	CCLE	HSSRB	lymphocyte-like	ACH-000889	multiple_myeloma			Asian	0.5655		1		RPMI 1640 medium with 10% fetal bovine serum.	Lymphoid_Neoplasm	plasma_cell_myeloma
Cancer Cell Line Encyclopedia (Broad, 2019)	1A8	KMRC20_KIDNEY	Kidney Cancer	Renal Cell Carcinoma	A241Vfs*2	OncoKB: NA;CIViC: NA;MyCancerGenome: not present;CancerHotspot: no;3DHotspot: no	SIFT: NA;Polyphen-2: NA	Frame_Shift_Del	DEL	Diploid		NA	NA	NA	2	234527075	234527076	CA	-	2:g.234527075_234527076del	ENST00000373450.4:c.722_723del							229	44682						CCLE	HSSRB	ADHERENT	ACH-000250		65		Asian	0.2216	5%DMSO	0		DMEM+10% FBS	Carcinoma	renal_cell_carcinoma
Cancer Cell Line Encyclopedia (Broad, 2019)	1A7	KMS26_HAEMATOPOIETIC_AND_LYMPHOID_TISSUE	Mature B-Cell Neoplasms	Plasma Cell Myeloma	L193I	OncoKB: NA;CIViC: NA;MyCancerGenome: not present;CancerHotspot: no;3DHotspot: no	SIFT: NA;Polyphen-2: NA	Missense_Mutation	SNP	Diploid		NA	NA	NA	2	234591160	234591160	C	A	2:g.234591160C>A	ENST00000373426.3:c.577C>A							418	44682					50	CCLE		suspension	ACH-000588	multiple_myeloma	33.2		Asian	0.5464	5%DMSO	1		RPMI1640+10%FBS	Lymphoid_Neoplasm	plasma_cell_myeloma
Cancer Cell Line Encyclopedia (Broad, 2019)	1A4	KNS81_CENTRAL_NERVOUS_SYSTEM	Glioma	Glioblastoma Multiforme	S43Afs*23	OncoKB: NA;CIViC: NA;MyCancerGenome: not present;CancerHotspot: no;3DHotspot: no	SIFT: NA;Polyphen-2: NA	Frame_Shift_Del	DEL	Diploid		NA	NA	NA	2	234627593	234627593	A	-	2:g.234627593del	ENST00000373409.3:c.127del							255	44682					65	CCLE	HSSRB	Fibroblast-like	ACH-000479		70		Asian	0.1845	10%DMSO	0		DMEM+15%FBS	Glioma	astrocytoma_Grade_IV
Cancer Cell Line Encyclopedia (Broad, 2019)	1A4	KNS81FD_CENTRAL_NERVOUS_SYSTEM	Cancer of Unknown Primary	Cancer of Unknown Primary	S43Afs*23	OncoKB: NA;CIViC: NA;MyCancerGenome: not present;CancerHotspot: no;3DHotspot: no	SIFT: NA;Polyphen-2: NA	Frame_Shift_Del	DEL			NA	NA	NA	2	234627593	234627593	A	-	2:g.234627593del	ENST00000373409.3:c.127del							259	44682									ACH-002259
Cancer Cell Line Encyclopedia (Broad, 2019)	1A4	KOSC2_UPPER_AERODIGESTIVE_TRACT	Cancer of Unknown Primary	Cancer of Unknown Primary	X289_splice	OncoKB: NA;CIViC: NA;MyCancerGenome: not present;CancerHotspot: no;3DHotspot: no	SIFT: NA;Polyphen-2: NA	Splice_Site	SNP			NA	NA	NA	2	234628334	234628334	G	T	2:g.234628334G>T	ENST00000373409.3:c.867+1G>T							269										ACH-002260
Cancer Cell Line Encyclopedia (Broad, 2019)	3A1	KP2_PANCREAS	Pancreatic Cancer	Pancreatic Adenocarcinoma	E98G	OncoKB: NA;CIViC: NA;MyCancerGenome: not present;CancerHotspot: no;3DHotspot: no	SIFT: impact: tolerated, score: 0.06;Polyphen-2: impact: benign, score: 0.229	Missense_Mutation	SNP	Diploid		NA	NA	NA	5	35968139	35968139	T	C	5:g.35968139T>C	ENST00000274278.3:c.293A>G							288	44745					65	CCLE	NIBRI		ACH-000281	Pancreatic Cancer			Asian	0.6201		0			Carcinoma	NS
Cancer Cell Line Encyclopedia (Broad, 2019)	2B10	KP4_PANCREAS	Pancreatic Cancer	Pancreatic Adenocarcinoma	T350S	OncoKB: NA;CIViC: NA;MyCancerGenome: not present;CancerHotspot: no;3DHotspot: no	SIFT: impact: deleterious, score: 0.01;Polyphen-2: impact: probably_damaging, score: 0.999	Missense_Mutation	SNP			NA	NA	NA	4	69692176	69692176	A	T	4:g.69692176A>T	ENST00000265403.7:c.1048A>T							270	44716					50	CCLE		adherent	ACH-000265				Asian	0.5128	5%DMSO	1	japan	IMDM+10%FBS	Carcinoma	ductal_carcinoma
Cancer Cell Line Encyclopedia (Broad, 2019)	2B4	KU1919_URINARY_TRACT	Bladder Cancer	Bladder Urothelial Carcinoma	F156V	OncoKB: NA;CIViC: NA;MyCancerGenome: not present;CancerHotspot: no;3DHotspot: no	SIFT: impact: deleterious, score: 0;Polyphen-2: impact: benign, score: 0	Missense_Mutation	SNP	Diploid		NA	NA	NA	4	70361114	70361114	A	C	4:g.70361114A>C	ENST00000305107.6:c.466T>G							335	44713					76	CCLE	DSMZ	Adherent	ACH-000486		35.1		Asian	0.4385	5%DMSO	0		RPMI +10%FBS	Carcinoma	transitional_cell_carcinoma
Cancer Cell Line Encyclopedia (Broad, 2019)	2B7	KYO1_HAEMATOPOIETIC_AND_LYMPHOID_TISSUE	Blood Cancer	Chronic Myelogenous Leukemia	V147I	OncoKB: NA;CIViC: NA;MyCancerGenome: not present;CancerHotspot: no;3DHotspot: no	SIFT: impact: tolerated, score: 0.19;Polyphen-2: impact: benign, score: 0.076	Missense_Mutation	SNP	Diploid		NA	NA	NA	4	69962677	69962677	G	A	4:g.69962677G>A	ENST00000305231.7:c.439G>A							278	44713	4.25662e-05		rs760454742		22	CCLE	DSMZ	Round Cells or clumps in suspension	ACH-000604		65.8		Asian	0.4479	10%DMSO	0	japan	RPMI+20%FBS	Haematopoietic_Neoplasm	blast_phase_chronic_myeloid_leukaemia
Cancer Cell Line Encyclopedia (Broad, 2019)	2B28	KYSE140_OESOPHAGUS	Esophagogastric Cancer	Esophageal Adenocarcinoma	S421L	OncoKB: NA;CIViC: NA;MyCancerGenome: not present;CancerHotspot: no;3DHotspot: no	SIFT: impact: deleterious, score: 0;Polyphen-2: impact: probably_damaging, score: 0.91	Missense_Mutation	SNP	Diploid	3	NA	NA	NA	4	70156481	70156481	C	T	4:g.70156481C>T	ENST00000335568.5:c.1262C>T							771	44717					54	CCLE	DSMZ	Adherent monolayer	ACH-000823		27.5		Asian	0.619	10%DMSO	1	japan	RPMI 1640+10%FBS	Carcinoma	squamous_cell_carcinoma
Cancer Cell Line Encyclopedia (Broad, 2019)	2B11	KYSE150_OESOPHAGUS	Esophagogastric Cancer	Esophageal Adenocarcinoma	S263I	OncoKB: NA;CIViC: NA;MyCancerGenome: not present;CancerHotspot: no;3DHotspot: no	SIFT: impact: deleterious, score: 0.01;Polyphen-2: impact: benign, score: 0	Missense_Mutation	SNP	Diploid		NA	NA	NA	4	70078373	70078373	C	A	4:g.70078373C>A	ENST00000446444.1:c.788G>T							655	44714					49	CCLE	DSMZ	Epithelial adherent monolayer	ACH-000855		40		Asian	0.4155	10%DMSO	1	japan	RPMI:Ham F12 +5%FBS	Carcinoma	squamous_cell_carcinoma
Cancer Cell Line Encyclopedia (Broad, 2019)	2B4	KYSE270_OESOPHAGUS	Esophagogastric Cancer	Esophageal Adenocarcinoma	P267S	OncoKB: NA;CIViC: NA;MyCancerGenome: not present;CancerHotspot: no;3DHotspot: no	SIFT: impact: deleterious, score: 0.01;Polyphen-2: impact: probably_damaging, score: 1	Missense_Mutation	SNP	Diploid		NA	NA	NA	4	70359482	70359482	G	A	4:g.70359482G>A	ENST00000305107.6:c.799C>T							790	44714					79	CCLE	DSMZ	Adherent	ACH-000873		153.6		Asian	0.5804	5% DMSO	0	japan	RPMI + 10 % FBS	Carcinoma	squamous_cell_carcinoma
Cancer Cell Line Encyclopedia (Broad, 2019)	1A7	KYSE30_OESOPHAGUS	Esophagogastric Cancer	Esophageal Adenocarcinoma	E89K	OncoKB: NA;CIViC: NA;MyCancerGenome: not present;CancerHotspot: no;3DHotspot: no	SIFT: NA;Polyphen-2: NA	Missense_Mutation	SNP	Diploid		NA	NA	NA	2	234590848	234590848	G	A	2:g.234590848G>A	ENST00000373426.3:c.265G>A							807	44682					64	CCLE	GNF		ACH-000777	Esophageal Cancer		~ 30 hrs	Asian	0.5402		2	japan		Carcinoma	squamous_cell_carcinoma
Cancer Cell Line Encyclopedia (Broad, 2019)	3A2	KYSE410_OESOPHAGUS	Esophagogastric Cancer	Esophageal Adenocarcinoma	A510V	OncoKB: NA;CIViC: NA;MyCancerGenome: not present;CancerHotspot: no;3DHotspot: no	SIFT: impact: tolerated, score: 1;Polyphen-2: impact: benign, score: 0.001	Missense_Mutation	SNP	Diploid		NA	NA	NA	5	36035843	36035843	G	A	5:g.36035843G>A	ENST00000282507.3:c.1529C>T							872	44749			rs1741798711		51	CCLE	DSMZ	Epithelial adherent monolayer	ACH-000809		17.4		Asian	0.4575	10%DMSO	1	japan	RPMI-1640+10%FBS	Carcinoma	squamous_cell_carcinoma
Cancer Cell Line Encyclopedia (Broad, 2019)	2B7	KYSE70_OESOPHAGUS	Esophagogastric Cancer	Esophageal Adenocarcinoma	F149I	OncoKB: NA;CIViC: NA;MyCancerGenome: not present;CancerHotspot: no;3DHotspot: no	SIFT: impact: tolerated, score: 0.3;Polyphen-2: impact: benign, score: 0.167	Missense_Mutation	SNP	Diploid		NA	NA	NA	4	69962683	69962683	T	A	4:g.69962683T>A	ENST00000305231.7:c.445T>A							566	44713					77	CCLE	DSMZ	Epitheloid cells growing in monolayers	ACH-000784		62		Asian	0.6291	10%DMSO	1	japan	RPMI 1640+10%FBS	Carcinoma	squamous_cell_carcinoma
Cancer Cell Line Encyclopedia (Broad, 2019)	2A E2-6	L428_HAEMATOPOIETIC_AND_LYMPHOID_TISSUE	Hodgkin Lymphoma	Hodgkin Lymphoma	N357S	OncoKB: NA;CIViC: NA;MyCancerGenome: not present;CancerHotspot: no;3DHotspot: no	SIFT: impact: deleterious, score: 0;Polyphen-2: impact: probably_damaging, score: 0.996	Missense_Mutation	SNP	Diploid		NA	NA	NA	4	70460921	70460921	T	C	4:g.70460921T>C	ENST00000457664.2:c.1070A>G							564	44716					37	CCLE	DSMZ	Supsension	ACH-000754	lymphoma			Caucasian	0.456	5% DMSO	0		RPMI 1640 +10%FBS	Lymphoid_Neoplasm	Hodgkin_lymphoma
Cancer Cell Line Encyclopedia (Broad, 2019)	UGT8	L540_HAEMATOPOIETIC_AND_LYMPHOID_TISSUE	Hodgkin Lymphoma	Hodgkin Lymphoma	R48Afs*50	OncoKB: NA;CIViC: NA;MyCancerGenome: not present;CancerHotspot: no;3DHotspot: no	SIFT: NA;Polyphen-2: NA	Frame_Shift_Del	DEL	Diploid		NA	NA	NA	4	115544175	115544178	GAGA	-	4:g.115544175_115544178del	ENST00000310836.6:c.142_145del							713	44714					20	CCLE	DSMZ	round cells growing singly in suspention	ACH-000806			~ 70 hrs	Caucasian	0.4711		1		80% RPMI 1640 + 20% h. i. FBS	Lymphoid_Neoplasm	Hodgkin_lymphoma
Cancer Cell Line Encyclopedia (Broad, 2019)	2B11	L82_HAEMATOPOIETIC_AND_LYMPHOID_TISSUE	Mixed Cancer Types	Mixed Cancer Types	S263G	OncoKB: NA;CIViC: NA;MyCancerGenome: not present;CancerHotspot: no;3DHotspot: no	SIFT: impact: deleterious, score: 0;Polyphen-2: impact: benign, score: 0.007	Missense_Mutation	SNP			NA	NA	NA	4	70078374	70078374	T	C	4:g.70078374T>C	ENST00000446444.1:c.787A>G							407	44714
Cancer Cell Line Encyclopedia (Broad, 2019)	2A3	LAN6_AUTONOMIC_GANGLIA	Cancer of Unknown Primary	Cancer of Unknown Primary	W483L	OncoKB: NA;CIViC: NA;MyCancerGenome: not present;CancerHotspot: no;3DHotspot: no	SIFT: impact: deleterious, score: 0.01;Polyphen-2: impact: probably_damaging, score: 0.957	Missense_Mutation	SNP		1	NA	NA	NA	4	69795667	69795667	C	A	4:g.69795667C>A	ENST00000251566.4:c.1448G>T							243	44718									ACH-001355
Cancer Cell Line Encyclopedia (Broad, 2019)	2A3	LB2241RCC_KIDNEY	Cancer of Unknown Primary	Cancer of Unknown Primary	V389M	OncoKB: NA;CIViC: NA;MyCancerGenome: not present;CancerHotspot: no;3DHotspot: no	SIFT: impact: deleterious, score: 0;Polyphen-2: impact: probably_damaging, score: 0.997	Missense_Mutation	SNP		1	NA	NA	NA	4	69796403	69796403	C	T	4:g.69796403C>T	ENST00000251566.4:c.1165G>A							114	44717									ACH-002151
Cancer Cell Line Encyclopedia (Broad, 2019)	1A1	LB2518MEL_SKIN	Cancer of Unknown Primary	Cancer of Unknown Primary	N220S	OncoKB: NA;CIViC: NA;MyCancerGenome: not present;CancerHotspot: no;3DHotspot: no	SIFT: NA;Polyphen-2: NA	Missense_Mutation	SNP			NA	NA	NA	2	234669592	234669592	A	G	2:g.234669592A>G	ENST00000305208.5:c.659A>G							381	44682									ACH-002152
Cancer Cell Line Encyclopedia (Broad, 2019)	2B28	LC2AD_LUNG	Cancer of Unknown Primary	Cancer of Unknown Primary	L415V	OncoKB: NA;CIViC: NA;MyCancerGenome: not present;CancerHotspot: no;3DHotspot: no	SIFT: impact: tolerated, score: 0.56;Polyphen-2: impact: benign, score: 0.319	Missense_Mutation	SNP			NA	NA	NA	4	70156462	70156462	C	G	4:g.70156462C>G	ENST00000335568.5:c.1243C>G							341	44717									ACH-002157
Cancer Cell Line Encyclopedia (Broad, 2019)	UGT8	LCLC103H_LUNG	Non-Small Cell Lung Cancer	Non-Small Cell Lung Cancer	P440L	OncoKB: NA;CIViC: NA;MyCancerGenome: not present;CancerHotspot: no;3DHotspot: no	SIFT: impact: deleterious, score: 0;Polyphen-2: impact: probably_damaging, score: 0.996	Missense_Mutation	SNP	Diploid		NA	NA	NA	4	115597137	115597137	C	T	4:g.115597137C>T	ENST00000310836.6:c.1319C>T							419	44718					61	CCLE	DSMZ	pleomorphic, gigantic, adherent cells growing as monolayer	ACH-000627			~ 40 hrs	Caucasian	0.4565		1		90% RPMI 1640 +10% h. i. FBS	Carcinoma	large_cell_carcinoma
Cancer Cell Line Encyclopedia (Broad, 2019)	2B11	LCLC97TM1_LUNG	Non-Small Cell Lung Cancer	Non-Small Cell Lung Cancer	M316T	OncoKB: NA;CIViC: NA;MyCancerGenome: not present;CancerHotspot: no;3DHotspot: no	SIFT: impact: deleterious, score: 0.01;Polyphen-2: impact: benign, score: 0.007	Missense_Mutation	SNP	Diploid		NA	NA	NA	4	70074124	70074124	A	G	4:g.70074124A>G	ENST00000446444.1:c.947T>C							415	44715					44	CCLE	DSMZ	adherent epitheloid cells densely packed in islets,growing as monolayers	ACH-000596			> 50 hrs	Caucasian	0.4847		1		80% RPMI 1640 + 20% h. i. FBS	Carcinoma	large_cell_carcinoma
Cancer Cell Line Encyclopedia (Broad, 2019)	2B4	LI7_LIVER	Hepatobiliary Cancer	Hepatocellular Carcinoma	K455R	OncoKB: NA;CIViC: NA;MyCancerGenome: not present;CancerHotspot: no;3DHotspot: no	SIFT: impact: deleterious, score: 0.03;Polyphen-2: impact: probably_damaging, score: 0.988	Missense_Mutation	SNP	Diploid		NA	NA	NA	4	70346575	70346575	T	C	4:g.70346575T>C	ENST00000305107.6:c.1364A>G							294	44718						CCLE	RIKEN	epithelial-like	ACH-000471				Asian	0.693		1		RPMI 1640 +10%FBS	Carcinoma	hepatocellular_carcinoma
Cancer Cell Line Encyclopedia (Broad, 2019)	1A3	LIM1215_LARGE_INTESTINE	Cancer of Unknown Primary	Cancer of Unknown Primary	L173Ffs*2	OncoKB: NA;CIViC: NA;MyCancerGenome: not present;CancerHotspot: no;3DHotspot: no	SIFT: NA;Polyphen-2: NA	Frame_Shift_Ins	INS		5	NA	NA	NA	2	234638282	234638283	-	TT	2:g.234638282_234638283insTT	ENST00000482026.1:c.517_518dup							907	44682									ACH-001546
Cancer Cell Line Encyclopedia (Broad, 2019)	1A5	LN18_CENTRAL_NERVOUS_SYSTEM	Glioma	Glioblastoma Multiforme	V243Gfs*50	OncoKB: NA;CIViC: NA;MyCancerGenome: not present;CancerHotspot: no;3DHotspot: no	SIFT: NA;Polyphen-2: NA	Frame_Shift_Ins	INS	Diploid		NA	NA	NA	2	234622362	234622363	-	G	2:g.234622362_234622363insG	ENST00000373414.3:c.727dup							595	44682					65	CCLE	ATCC	ADHERENT	ACH-000819		47.4		Caucasian	0.7439	5% DMSO	1		DMEM+5% FBS	Glioma	astrocytoma_Grade_IV
Cancer Cell Line Encyclopedia (Broad, 2019)	2B17	LN215_CENTRAL_NERVOUS_SYSTEM	Glioma	Glioblastoma Multiforme	V55M	OncoKB: NA;CIViC: NA;MyCancerGenome: not present;CancerHotspot: no;3DHotspot: no	SIFT: impact: deleterious, score: 0;Polyphen-2: impact: probably_damaging, score: 0.977	Missense_Mutation	SNP		1	NA	NA	NA	4	69434040	69434040	C	T	4:g.69434040C>T	ENST00000317746.2:c.163G>A							299	44713						COSMIC			ACH-000328				Caucasian						Glioma	astrocytoma_Grade_IV
Cancer Cell Line Encyclopedia (Broad, 2019)	1A10	LN229_CENTRAL_NERVOUS_SYSTEM	Glioma	Glioblastoma Multiforme	G273R	OncoKB: NA;CIViC: NA;MyCancerGenome: not present;CancerHotspot: no;3DHotspot: no	SIFT: impact: deleterious, score: 0;Polyphen-2: impact: probably_damaging, score: 0.993	Missense_Mutation	SNP	Diploid		NA	NA	NA	2	234545985	234545985	G	C	2:g.234545985G>C	ENST00000344644.5:c.817G>C							416	44682					60	CCLE	NIBRI		ACH-000595				Caucasian	0.5836		2			Glioma	astrocytoma_Grade_IV
Cancer Cell Line Encyclopedia (Broad, 2019)	1A6	LN428_CENTRAL_NERVOUS_SYSTEM	Glioma	Glioblastoma Multiforme	S227*	OncoKB: NA;CIViC: NA;MyCancerGenome: not present;CancerHotspot: no;3DHotspot: no	SIFT: NA;Polyphen-2: NA	Nonsense_Mutation	SNP			NA	NA	NA	2	234602330	234602330	C	G	2:g.234602330C>G	ENST00000305139.6:c.680C>G							322	44682						COSMIC			ACH-000455				Caucasian						Glioma	astrocytoma_Grade_IV
Cancer Cell Line Encyclopedia (Broad, 2019)	3A2	LNCAPCLONEFGC_PROSTATE	Prostate Cancer	Prostate Adenocarcinoma	A517T	OncoKB: NA;CIViC: NA;MyCancerGenome: not present;CancerHotspot: no;3DHotspot: no	SIFT: impact: tolerated, score: 0.2;Polyphen-2: impact: benign, score: 0.068	Missense_Mutation	SNP	Diploid		NA	NA	NA	5	36035823	36035823	C	T	5:g.36035823C>T	ENST00000282507.3:c.1549G>A							4223	44749	3.98403e-06		rs775836223		50	CCLE	NIBRI		ACH-000977	prostate_cancer	53		Caucasian	0.1391		0			Carcinoma	adenocarcinoma
Cancer Cell Line Encyclopedia (Broad, 2019)	3A2	LNZTA3WT4_CENTRAL_NERVOUS_SYSTEM	Cancer of Unknown Primary	Cancer of Unknown Primary	I427F	OncoKB: NA;CIViC: NA;MyCancerGenome: not present;CancerHotspot: no;3DHotspot: no	SIFT: impact: deleterious, score: 0;Polyphen-2: impact: possibly_damaging, score: 0.702	Missense_Mutation	SNP			NA	NA	NA	5	36037915	36037915	T	A	5:g.36037915T>A	ENST00000282507.3:c.1279A>T							397	44748									ACH-002269
Cancer Cell Line Encyclopedia (Broad, 2019)	3A1	LOUNH91_LUNG	Non-Small Cell Lung Cancer	Non-Small Cell Lung Cancer	V375I	OncoKB: NA;CIViC: NA;MyCancerGenome: not present;CancerHotspot: no;3DHotspot: no	SIFT: impact: tolerated, score: 1;Polyphen-2: impact: benign, score: 0.01	Missense_Mutation	SNP	Diploid		NA	NA	NA	5	35955919	35955919	C	T	5:g.35955919C>T	ENST00000274278.3:c.1123G>A							191	44748					64	CCLE	DSMZ	ADHERENT OVOID TO EPITHELOID CELLS GROWING IN MONOLAYERS	ACH-000176	Lung Cancer	101.6		Caucasian	0.2166	5%DMSO	1		RPMI-1640 + 20% FBS	Carcinoma	squamous_cell_carcinoma
Cancer Cell Line Encyclopedia (Broad, 2019)	3A1	LOVO_LARGE_INTESTINE	Colorectal Cancer	Colorectal Adenocarcinoma	L495F	OncoKB: NA;CIViC: NA;MyCancerGenome: not present;CancerHotspot: no;3DHotspot: no	SIFT: impact: tolerated, score: 0.13;Polyphen-2: impact: benign, score: 0.209	Missense_Mutation	SNP	Diploid		NA	NA	NA	5	35954393	35954393	G	A	5:g.35954393G>A	ENST00000274278.3:c.1483C>T							2302	44749					56	CCLE	NIBRI		ACH-000950	colorectal_cancer			Caucasian	0.2092		0			Carcinoma	adenocarcinoma
Cancer Cell Line Encyclopedia (Broad, 2019)	1A1	LS180_LARGE_INTESTINE	Colorectal Cancer	Colorectal Adenocarcinoma	V226I	OncoKB: NA;CIViC: NA;MyCancerGenome: not present;CancerHotspot: no;3DHotspot: no	SIFT: NA;Polyphen-2: NA	Missense_Mutation	SNP	Diploid		NA	NA	NA	2	234669609	234669609	G	A	2:g.234669609G>A	ENST00000305208.5:c.676G>A							2262	44682	7.95412e-06		rs761943511		58	CCLE			ACH-000957	colon_cancer			Caucasian	0.026		0			Carcinoma	adenocarcinoma
Cancer Cell Line Encyclopedia (Broad, 2019)	2A3	LS411N_LARGE_INTESTINE	Colorectal Cancer	Colorectal Adenocarcinoma	I152N	OncoKB: NA;CIViC: NA;MyCancerGenome: not present;CancerHotspot: no;3DHotspot: no	SIFT: impact: tolerated, score: 0.31;Polyphen-2: impact: benign, score: 0.387	Missense_Mutation	SNP	Diploid		NA	NA	NA	4	69817024	69817024	A	T	4:g.69817024A>T	ENST00000251566.4:c.455T>A							5442	44713					32	CCLE	ATCC	adherent epithelial	ACH-000985		69.9		Caucasian	0.2807	5% DMSO	1		RPMI-1640+10% FBS	Carcinoma	adenocarcinoma
Cancer Cell Line Encyclopedia (Broad, 2019)	2B10	LU134A_LUNG	Cancer of Unknown Primary	Cancer of Unknown Primary	V168G	OncoKB: NA;CIViC: NA;MyCancerGenome: not present;CancerHotspot: no;3DHotspot: no	SIFT: impact: deleterious, score: 0;Polyphen-2: impact: probably_damaging, score: 0.991	Missense_Mutation	SNP			NA	NA	NA	4	69682240	69682240	T	G	4:g.69682240T>G	ENST00000265403.7:c.503T>G							334	44713									ACH-002051
Cancer Cell Line Encyclopedia (Broad, 2019)	1A9	LUDLU1_LUNG	Non-Small Cell Lung Cancer	Non-Small Cell Lung Cancer	L173R	OncoKB: NA;CIViC: NA;MyCancerGenome: not present;CancerHotspot: no;3DHotspot: no	SIFT: NA;Polyphen-2: NA	Missense_Mutation	SNP	Diploid		NA	NA	NA	2	234581098	234581098	T	G	2:g.234581098T>G	ENST00000354728.4:c.518T>G							235	44682					72	CCLE	ECAAC	epithelial, adherent	ACH-000390		120.7		Caucasian	0.773	5% DMSO	0		RPMI-1640+10% FBS	Carcinoma	squamous_cell_carcinoma
Cancer Cell Line Encyclopedia (Broad, 2019)	2B28	LXF289_LUNG	Non-Small Cell Lung Cancer	Non-Small Cell Lung Cancer	N402K	OncoKB: NA;CIViC: NA;MyCancerGenome: not present;CancerHotspot: no;3DHotspot: no	SIFT: impact: deleterious, score: 0;Polyphen-2: impact: probably_damaging, score: 1	Missense_Mutation	SNP	Diploid		NA	NA	NA	4	70156425	70156425	C	A	4:g.70156425C>A	ENST00000335568.5:c.1206C>A							523	44717					63	CCLE	DSMZ	adherent epithelial-like growing as monolayer	ACH-000787		63.2	50 hrs	Caucasian	0.4917	5%DMSO	1		Hams F10+10% FBS	Carcinoma	adenocarcinoma
Cancer Cell Line Encyclopedia (Broad, 2019)	3A1	M00921_SKIN	Mixed Cancer Types	Mixed Cancer Types	P473S	OncoKB: NA;CIViC: NA;MyCancerGenome: not present;CancerHotspot: no;3DHotspot: no	SIFT: impact: tolerated, score: 0.19;Polyphen-2: impact: benign, score: 0.401	Missense_Mutation	SNP			NA	NA	NA	5	35954459	35954459	G	A	5:g.35954459G>A	ENST00000274278.3:c.1417C>T							303	44749
Cancer Cell Line Encyclopedia (Broad, 2019)	2B15	M059J_CENTRAL_NERVOUS_SYSTEM	Cancer of Unknown Primary	Cancer of Unknown Primary	L484I	OncoKB: NA;CIViC: NA;MyCancerGenome: not present;CancerHotspot: no;3DHotspot: no	SIFT: impact: deleterious, score: 0;Polyphen-2: impact: probably_damaging, score: 1	Missense_Mutation	SNP			NA	NA	NA	4	69512965	69512965	G	T	4:g.69512965G>T	ENST00000338206.5:c.1450C>A							139	44718									ACH-001118
Cancer Cell Line Encyclopedia (Broad, 2019)	3A2	M14_SKIN	Cancer of Unknown Primary	Cancer of Unknown Primary	P185S	OncoKB: NA;CIViC: NA;MyCancerGenome: not present;CancerHotspot: no;3DHotspot: no	SIFT: impact: deleterious, score: 0;Polyphen-2: impact: probably_damaging, score: 1	Missense_Mutation	SNP		3	NA	NA	NA	5	36049281	36049281	G	A	5:g.36049281G>A	ENST00000282507.3:c.553C>T							1085	44746									ACH-002159
Cancer Cell Line Encyclopedia (Broad, 2019)	2B17	M980513_SKIN	Mixed Cancer Types	Mixed Cancer Types	S108L	OncoKB: NA;CIViC: NA;MyCancerGenome: not present;CancerHotspot: no;3DHotspot: no	SIFT: impact: tolerated, score: 0.26;Polyphen-2: impact: benign, score: 0.017	Missense_Mutation	SNP			NA	NA	NA	4	69433880	69433880	G	A	4:g.69433880G>A	ENST00000317746.2:c.323C>T							446	44713
Cancer Cell Line Encyclopedia (Broad, 2019)	UGT8	MAC2A_HAEMATOPOIETIC_AND_LYMPHOID_TISSUE	Mixed Cancer Types	Mixed Cancer Types	E167*	OncoKB: NA;CIViC: NA;MyCancerGenome: not present;CancerHotspot: no;3DHotspot: no	SIFT: NA;Polyphen-2: NA	Nonsense_Mutation	SNP			NA	NA	NA	4	115544535	115544535	G	T	4:g.115544535G>T	ENST00000310836.6:c.499G>T							337	44714
Cancer Cell Line Encyclopedia (Broad, 2019)	2B28	MC1010_HAEMATOPOIETIC_AND_LYMPHOID_TISSUE	Cancer of Unknown Primary	Cancer of Unknown Primary	Y219H	OncoKB: NA;CIViC: NA;MyCancerGenome: not present;CancerHotspot: no;3DHotspot: no	SIFT: impact: deleterious, score: 0.02;Polyphen-2: impact: benign, score: 0.114	Missense_Mutation	SNP			NA	NA	NA	4	70146873	70146873	T	C	4:g.70146873T>C	ENST00000335568.5:c.655T>C							112	44713									ACH-002390
Cancer Cell Line Encyclopedia (Broad, 2019)	2B28	MCAS_OVARY	Ovarian Cancer	Ovarian Carcinosarcoma/Malignant Mixed Mesodermal Tumor	R124K	OncoKB: NA;CIViC: NA;MyCancerGenome: not present;CancerHotspot: no;3DHotspot: no	SIFT: impact: tolerated, score: 1;Polyphen-2: impact: benign, score: 0.003	Missense_Mutation	SNP	Diploid		NA	NA	NA	4	70146589	70146589	G	A	4:g.70146589G>A	ENST00000335568.5:c.371G>A							415	44713						CCLE	HSRRB	Adherent; DT=27hrs	ACH-000796	Ovarian Cancer	30	27 hrs	Asian	0.391	5% DMSO	0		EMEM+20%FBS	Carcinoma	adenocarcinoma
Cancer Cell Line Encyclopedia (Broad, 2019)	UGT8	MCC13_SKIN	Cancer of Unknown Primary	Cancer of Unknown Primary	R453C	OncoKB: NA;CIViC: NA;MyCancerGenome: not present;CancerHotspot: no;3DHotspot: no	SIFT: impact: deleterious, score: 0;Polyphen-2: impact: probably_damaging, score: 0.99	Missense_Mutation	SNP		1	NA	NA	NA	4	115597175	115597175	C	T	4:g.115597175C>T	ENST00000310836.6:c.1357C>T							4311	44718									ACH-001550
Cancer Cell Line Encyclopedia (Broad, 2019)	3A2	MCC142_SKIN	Mixed Cancer Types	Mixed Cancer Types	T54I	OncoKB: NA;CIViC: NA;MyCancerGenome: not present;CancerHotspot: no;3DHotspot: no	SIFT: impact: deleterious, score: 0.03;Polyphen-2: impact: benign, score: 0.038	Missense_Mutation	SNP			NA	NA	NA	5	36064386	36064386	G	A	5:g.36064386G>A	ENST00000282507.3:c.161C>T							392	44744	3.97712e-06		rs1322775972
Cancer Cell Line Encyclopedia (Broad, 2019)	3A2	MCC26_SKIN	Cancer of Unknown Primary	Cancer of Unknown Primary	R364C	OncoKB: NA;CIViC: NA;MyCancerGenome: not present;CancerHotspot: no;3DHotspot: no	SIFT: impact: deleterious, score: 0.04;Polyphen-2: impact: benign, score: 0.097	Missense_Mutation	SNP			NA	NA	NA	5	36038104	36038104	G	A	5:g.36038104G>A	ENST00000282507.3:c.1090C>T							1360	44748	3.40865e-05		rs762817377						ACH-001552
Cancer Cell Line Encyclopedia (Broad, 2019)	2B17	MDAMB330_BREAST	Cancer of Unknown Primary	Cancer of Unknown Primary	D264N	OncoKB: NA;CIViC: NA;MyCancerGenome: not present;CancerHotspot: no;3DHotspot: no	SIFT: impact: tolerated, score: 0.06;Polyphen-2: impact: possibly_damaging, score: 0.693	Missense_Mutation	SNP		1	NA	NA	NA	4	69431373	69431373	C	T	4:g.69431373C>T	ENST00000317746.2:c.790G>A							283	44714									ACH-001358
Cancer Cell Line Encyclopedia (Broad, 2019)	2B11	MDAMB361_BREAST	Breast Cancer	Invasive Breast Carcinoma	S70C	OncoKB: NA;CIViC: NA;MyCancerGenome: not present;CancerHotspot: no;3DHotspot: no	SIFT: impact: deleterious, score: 0;Polyphen-2: impact: probably_damaging, score: 0.95	Missense_Mutation	SNP	Diploid	2	NA	NA	NA	4	70080232	70080232	G	C	4:g.70080232G>C	ENST00000446444.1:c.209C>G							1251	44713					40	CCLE	ATCC	loosely adherent epithelial	ACH-000934	breast_cancer	168.2		Caucasian	0.7182	5% DMSO	1		RPMI-20% FBS	Carcinoma	NS
Cancer Cell Line Encyclopedia (Broad, 2019)	2B10	MDAMB415_BREAST	Breast Cancer	Invasive Breast Carcinoma	V130L	OncoKB: NA;CIViC: NA;MyCancerGenome: not present;CancerHotspot: no;3DHotspot: no	SIFT: impact: tolerated, score: 0.23;Polyphen-2: impact: benign, score: 0.047	Missense_Mutation	SNP			NA	NA	NA	4	69682125	69682125	G	C	4:g.69682125G>C	ENST00000265403.7:c.388G>C							758	44713					38	CCLE	ATCC	adherent epithelial	ACH-000876	breast_adenocarcinoma	184.8		Caucasian	0.5616	5%DMSO	0		RPMI-1640 + 15% FBS	Carcinoma	NS
Cancer Cell Line Encyclopedia (Broad, 2019)	2A3	MDAMB436_BREAST	Breast Cancer	Invasive Breast Carcinoma	K525N	OncoKB: NA;CIViC: NA;MyCancerGenome: not present;CancerHotspot: no;3DHotspot: no	SIFT: impact: deleterious, score: 0.01;Polyphen-2: impact: benign, score: 0.192	Missense_Mutation	SNP	Diploid		NA	NA	NA	4	69795540	69795540	C	A	4:g.69795540C>A	ENST00000251566.4:c.1575G>T							385	44718					43	CCLE	ATCC	Adherent	ACH-000573	breast_cancer	58.6		Caucasian	0.9615	5%DMSO	0		RPMI-1640 + 10% FBS	Carcinoma	NS
Cancer Cell Line Encyclopedia (Broad, 2019)	2A E2-6	MDAMB453_BREAST	Breast Cancer	Invasive Breast Carcinoma	H496Y	OncoKB: NA;CIViC: NA;MyCancerGenome: not present;CancerHotspot: no;3DHotspot: no	SIFT: impact: tolerated, score: 0.06;Polyphen-2: impact: probably_damaging, score: 0.998	Missense_Mutation	SNP	Diploid		NA	NA	NA	4	70455215	70455215	G	A	4:g.70455215G>A	ENST00000457664.2:c.1486C>T							857	44718					48	CCLE	NIBRI		ACH-000910	breast_cancer			Caucasian	0.3994		0			Carcinoma	NS
Cancer Cell Line Encyclopedia (Broad, 2019)	3A1	MDAPCA2B_PROSTATE	Prostate Cancer	Prostate Adenocarcinoma	R5W	OncoKB: NA;CIViC: NA;MyCancerGenome: not present;CancerHotspot: no;3DHotspot: no	SIFT: impact: tolerated_low_confidence, score: 0.06;Polyphen-2: impact: possibly_damaging, score: 0.551	Missense_Mutation	SNP	Diploid		NA	NA	NA	5	35991330	35991330	G	A	5:g.35991330G>A	ENST00000274278.3:c.13C>T							1536	44743					63	CCLE	ATCC	adherent epithelial	ACH-000952	prostate_cancer			African_american	0.0889	5% DMSO	0		HAMS F12 +20% FBS	Carcinoma	adenocarcinoma
Cancer Cell Line Encyclopedia (Broad, 2019)	3A1	MDST8_LARGE_INTESTINE	Colorectal Cancer	Colorectal Adenocarcinoma	E71K	OncoKB: NA;CIViC: NA;MyCancerGenome: not present;CancerHotspot: no;3DHotspot: no	SIFT: impact: tolerated, score: 0.57;Polyphen-2: impact: benign, score: 0.015	Missense_Mutation	SNP	Diploid	5	NA	NA	NA	5	35968221	35968221	C	T	5:g.35968221C>T	ENST00000274278.3:c.211G>A							776	44745						CCLE	ECACC	adherent	ACH-000935		40.9		Caucasian	0.5583	5% DMSO	0		DMEM+10% FBS	Carcinoma	adenocarcinoma
Cancer Cell Line Encyclopedia (Broad, 2019)	2B15	ME180_CERVIX	Cancer of Unknown Primary	Cancer of Unknown Primary	F463L	OncoKB: NA;CIViC: NA;MyCancerGenome: not present;CancerHotspot: no;3DHotspot: no	SIFT: impact: deleterious, score: 0.02;Polyphen-2: impact: probably_damaging, score: 0.981	Missense_Mutation	SNP			NA	NA	NA	4	69513026	69513026	G	C	4:g.69513026G>C	ENST00000338206.5:c.1389C>G							180	44718									ACH-001359
Cancer Cell Line Encyclopedia (Broad, 2019)	1A3	MEL202_EYE	Cancer of Unknown Primary	Cancer of Unknown Primary	C281Y	OncoKB: NA;CIViC: NA;MyCancerGenome: not present;CancerHotspot: no;3DHotspot: no	SIFT: NA;Polyphen-2: NA	Missense_Mutation	SNP		1	NA	NA	NA	2	234638614	234638614	G	A	2:g.234638614G>A	ENST00000482026.1:c.842G>A							124	44682									ACH-001554
Cancer Cell Line Encyclopedia (Broad, 2019)	2A E2-6	MELJUSO_SKIN	Melanoma	Cutaneous Melanoma	R535K	OncoKB: NA;CIViC: NA;MyCancerGenome: not present;CancerHotspot: no;3DHotspot: no	SIFT: impact: tolerated, score: 0.28;Polyphen-2: impact: probably_damaging, score: 0.99	Missense_Mutation	SNP	Diploid		NA	NA	NA	4	70455097	70455097	C	T	4:g.70455097C>T	ENST00000457664.2:c.1604G>A							880	44718					58	CCLE	DSMZ	Adherent epithelial, monolayer	ACH-000881	melanoma	36.4		Caucasian	0.2796	10%DMSO	0		RPMI-1640+10% FBS	Malignant_Melanoma	NS
Cancer Cell Line Encyclopedia (Broad, 2019)	2A3	MERO25_LUNG	Mixed Cancer Types	Mixed Cancer Types	A368Lfs*8	OncoKB: NA;CIViC: NA;MyCancerGenome: not present;CancerHotspot: no;3DHotspot: no	SIFT: NA;Polyphen-2: NA	Frame_Shift_Del	DEL			NA	NA	NA	4	69796470	69796470	G	-	4:g.69796470del	ENST00000251566.4:c.1098del							130	44717
Cancer Cell Line Encyclopedia (Broad, 2019)	2B28	MERO82_LUNG	Mixed Cancer Types	Mixed Cancer Types	W256*	OncoKB: NA;CIViC: NA;MyCancerGenome: not present;CancerHotspot: no;3DHotspot: no	SIFT: NA;Polyphen-2: NA	Nonsense_Mutation	SNP			NA	NA	NA	4	70148278	70148278	G	A	4:g.70148278G>A	ENST00000335568.5:c.768G>A							119	44714
Cancer Cell Line Encyclopedia (Broad, 2019)	1A4	MERO95_LUNG	Mixed Cancer Types	Mixed Cancer Types	W84G	OncoKB: NA;CIViC: NA;MyCancerGenome: not present;CancerHotspot: no;3DHotspot: no	SIFT: NA;Polyphen-2: NA	Missense_Mutation	SNP		1	NA	NA	NA	2	234627716	234627716	T	G	2:g.234627716T>G	ENST00000373409.3:c.250T>G							163	44682
Cancer Cell Line Encyclopedia (Broad, 2019)	2B7	MESSA_SOFT_TISSUE	Soft Tissue Sarcoma	Embryonal Rhabdomyosarcoma	V130L	OncoKB: NA;CIViC: NA;MyCancerGenome: not present;CancerHotspot: no;3DHotspot: no	SIFT: impact: tolerated, score: 0.23;Polyphen-2: impact: benign, score: 0.011	Missense_Mutation	SNP	Diploid		NA	NA	NA	4	69962626	69962626	G	T	4:g.69962626G>T	ENST00000305231.7:c.388G>T							341	44713					56	CCLE	ATCC	Fibroblast adherent	ACH-000449		35.3		Caucasian	0.1154	5%DMSO	0		McCoy's 5A + 10%FBS	Sarcoma	NS
Cancer Cell Line Encyclopedia (Broad, 2019)	2A E2-6	MET2B	Mixed Cancer Types	Mixed Cancer Types	P401S	OncoKB: NA;CIViC: NA;MyCancerGenome: not present;CancerHotspot: no;3DHotspot: no	SIFT: impact: deleterious, score: 0;Polyphen-2: impact: probably_damaging, score: 1	Missense_Mutation	SNP			NA	NA	NA	4	70460325	70460325	G	A	4:g.70460325G>A	ENST00000457664.2:c.1201C>T							812	44717
Cancer Cell Line Encyclopedia (Broad, 2019)	3A2	MEWO_SKIN	Melanoma	Cutaneous Melanoma	L166F	OncoKB: NA;CIViC: NA;MyCancerGenome: not present;CancerHotspot: no;3DHotspot: no	SIFT: impact: tolerated, score: 0.11;Polyphen-2: impact: probably_damaging, score: 0.92	Missense_Mutation	SNP	Diploid	2	NA	NA	NA	5	36049338	36049338	G	A	5:g.36049338G>A	ENST00000282507.3:c.496C>T							4898	44746					78	CCLE	GNF		ACH-000987				Caucasian	0.1645		0			Malignant_Melanoma	NS
Cancer Cell Line Encyclopedia (Broad, 2019)	2B17	MFE319_ENDOMETRIUM	Endometrial Cancer	Endometrial Carcinoma	A384T	OncoKB: NA;CIViC: NA;MyCancerGenome: not present;CancerHotspot: no;3DHotspot: no	SIFT: impact: deleterious, score: 0;Polyphen-2: impact: probably_damaging, score: 0.985	Missense_Mutation	SNP	Amp		NA	NA	NA	4	69416558	69416558	C	T	4:g.69416558C>T	ENST00000317746.2:c.1150G>A							4842	44717					81	CCLE	NIBRI		ACH-000988	Endometrial Cancer			Caucasian	0.0263		0			Carcinoma	adenocarcinoma
Cancer Cell Line Encyclopedia (Broad, 2019)	UGT8	MFHINO_SOFT_TISSUE	Cancer of Unknown Primary	Cancer of Unknown Primary	S270R	OncoKB: NA;CIViC: NA;MyCancerGenome: not present;CancerHotspot: no;3DHotspot: no	SIFT: impact: tolerated, score: 0.25;Polyphen-2: impact: benign, score: 0.014	Missense_Mutation	SNP			NA	NA	NA	4	115544846	115544846	C	G	4:g.115544846C>G	ENST00000310836.6:c.810C>G							273	44714									ACH-002271
Cancer Cell Line Encyclopedia (Broad, 2019)	2A3	MG63_BONE	Bone Cancer	Osteosarcoma	E207G	OncoKB: NA;CIViC: NA;MyCancerGenome: not present;CancerHotspot: no;3DHotspot: no	SIFT: impact: deleterious, score: 0;Polyphen-2: impact: probably_damaging, score: 0.932	Missense_Mutation	SNP	Diploid	1	NA	NA	NA	4	69816859	69816859	T	C	4:g.69816859T>C	ENST00000251566.4:c.620A>G							208	44713					14	CCLE	NIBRI		ACH-000359				Caucasian	0.5466		1			Osteosarcoma	NS
Cancer Cell Line Encyclopedia (Broad, 2019)	3A1	MHHES1_BONE	Bone Cancer	Ewing SarcomaÃƒ_	P188R	OncoKB: NA;CIViC: NA;MyCancerGenome: not present;CancerHotspot: no;3DHotspot: no	SIFT: impact: tolerated, score: 0.38;Polyphen-2: impact: benign, score: 0	Missense_Mutation	SNP	Diploid		NA	NA	NA	5	35965768	35965768	G	C	5:g.35965768G>C	ENST00000274278.3:c.563C>G							265	44746					12	CCLE	DSMZ	adherent cells of various size, single or in small clusters, growing as monolayer	ACH-000391			~ 28 hrs	Caucasian	0.3887		0		90% RPMI 1640 +10% h. i. FBS	Ewings_Sarcoma-Peripheral_Primitive_Neuroectodermal_Tumour	NS
Cancer Cell Line Encyclopedia (Broad, 2019)	1A5	MHHPREB1_HAEMATOPOIETIC_AND_LYMPHOID_TISSUE	Cancer of Unknown Primary	Cancer of Unknown Primary	F75Sfs*3	OncoKB: NA;CIViC: NA;MyCancerGenome: not present;CancerHotspot: no;3DHotspot: no	SIFT: NA;Polyphen-2: NA	Frame_Shift_Del	DEL			NA	NA	NA	2	234621857	234621857	T	-	2:g.234621857del	ENST00000373414.3:c.224del							2043	44682									ACH-002272
Cancer Cell Line Encyclopedia (Broad, 2019)	2B10	MKN1_STOMACH	Esophagogastric Cancer	Esophageal Squamous Cell Carcinoma	L490S	OncoKB: NA;CIViC: NA;MyCancerGenome: not present;CancerHotspot: no;3DHotspot: no	SIFT: impact: deleterious, score: 0;Polyphen-2: impact: probably_damaging, score: 0.992	Missense_Mutation	SNP			NA	NA	NA	4	69696479	69696479	T	C	4:g.69696479T>C	ENST00000265403.7:c.1469T>C							344	44718					72	CCLE	HSSRB	epithelial-like	ACH-000351				Asian	0.428		1	japan	RPMI 1640 medium with 10% fetal calf serum.	Carcinoma	mixed_adenosquamous_carcinoma
Cancer Cell Line Encyclopedia (Broad, 2019)	2B28	MKN28_STOMACH	Cancer of Unknown Primary	Cancer of Unknown Primary	S422C	OncoKB: NA;CIViC: NA;MyCancerGenome: not present;CancerHotspot: no;3DHotspot: no	SIFT: impact: deleterious, score: 0;Polyphen-2: impact: probably_damaging, score: 0.978	Missense_Mutation	SNP			NA	NA	NA	4	70156483	70156483	A	T	4:g.70156483A>T	ENST00000335568.5:c.1264A>T							345	44717									ACH-002161
Cancer Cell Line Encyclopedia (Broad, 2019)	2A3	MKN74_STOMACH	Esophagogastric Cancer	Esophageal Squamous Cell Carcinoma	D112V	OncoKB: NA;CIViC: NA;MyCancerGenome: not present;CancerHotspot: no;3DHotspot: no	SIFT: impact: tolerated, score: 0.08;Polyphen-2: impact: benign, score: 0.006	Missense_Mutation	SNP	Diploid	2	NA	NA	NA	4	69817144	69817144	T	A	4:g.69817144T>A	ENST00000251566.4:c.335A>T							516	44713					37	CCLE	HSSRB	epithelial-like	ACH-000758	gastric_cancer			Asian	0.4229		1	japan	RPMI 1640 medium with 10% heat inactivated fetal bovine serum	Carcinoma	tubular_adenocarcinoma
Cancer Cell Line Encyclopedia (Broad, 2019)	2A3	MLMA_HAEMATOPOIETIC_AND_LYMPHOID_TISSUE	Cancer of Unknown Primary	Cancer of Unknown Primary	V18F	OncoKB: NA;CIViC: NA;MyCancerGenome: not present;CancerHotspot: no;3DHotspot: no	SIFT: impact: tolerated, score: 1;Polyphen-2: impact: benign, score: 0	Missense_Mutation	SNP		1	NA	NA	NA	4	69817427	69817427	C	A	4:g.69817427C>A	ENST00000251566.4:c.52G>T							267	44713									ACH-002274
Cancer Cell Line Encyclopedia (Broad, 2019)	2B4	MM127_SKIN	Mixed Cancer Types	Mixed Cancer Types	Q225*	OncoKB: NA;CIViC: NA;MyCancerGenome: not present;CancerHotspot: no;3DHotspot: no	SIFT: NA;Polyphen-2: NA	Nonsense_Mutation	SNP			NA	NA	NA	4	70360907	70360907	G	A	4:g.70360907G>A	ENST00000305107.6:c.673C>T							680	44713
Cancer Cell Line Encyclopedia (Broad, 2019)	2B28	MM370_SKIN	Mixed Cancer Types	Mixed Cancer Types	E301K	OncoKB: NA;CIViC: NA;MyCancerGenome: not present;CancerHotspot: no;3DHotspot: no	SIFT: impact: tolerated, score: 0.15;Polyphen-2: impact: benign, score: 0.172	Missense_Mutation	SNP		1	NA	NA	NA	4	70152500	70152500	G	A	4:g.70152500G>A	ENST00000335568.5:c.901G>A							872	44715
Cancer Cell Line Encyclopedia (Broad, 2019)	3A2	MM383_SKIN	Mixed Cancer Types	Mixed Cancer Types	S302F	OncoKB: NA;CIViC: NA;MyCancerGenome: not present;CancerHotspot: no;3DHotspot: no	SIFT: impact: deleterious, score: 0.01;Polyphen-2: impact: probably_damaging, score: 0.998	Missense_Mutation	SNP			NA	NA	NA	5	36039749	36039749	G	A	5:g.36039749G>A	ENST00000282507.3:c.905C>T							475	44747			rs1741943607
Cancer Cell Line Encyclopedia (Broad, 2019)	2B11	MM386_SKIN	Mixed Cancer Types	Mixed Cancer Types	P436S	OncoKB: NA;CIViC: NA;MyCancerGenome: not present;CancerHotspot: no;3DHotspot: no	SIFT: impact: tolerated, score: 0.16;Polyphen-2: impact: possibly_damaging, score: 0.791	Missense_Mutation	SNP		2	NA	NA	NA	4	70070152	70070152	G	A	4:g.70070152G>A	ENST00000446444.1:c.1306C>T							922	44717
Cancer Cell Line Encyclopedia (Broad, 2019)	2B4	MOGGUVW_CENTRAL_NERVOUS_SYSTEM	Glioma	Glioblastoma Multiforme	L445F	OncoKB: NA;CIViC: NA;MyCancerGenome: not present;CancerHotspot: no;3DHotspot: no	SIFT: impact: deleterious, score: 0;Polyphen-2: impact: probably_damaging, score: 1	Missense_Mutation	SNP	Diploid		NA	NA	NA	4	70346604	70346604	T	G	4:g.70346604T>G	ENST00000305107.6:c.1335A>C							237	44718						CCLE			ACH-001126				Caucasian	0.3971		0			Glioma	astrocytoma
Cancer Cell Line Encyclopedia (Broad, 2019)	2B28	MOLP8_HAEMATOPOIETIC_AND_LYMPHOID_TISSUE	Mature B-Cell Neoplasms	Plasma Cell Myeloma	M214I	OncoKB: NA;CIViC: NA;MyCancerGenome: not present;CancerHotspot: no;3DHotspot: no	SIFT: impact: tolerated, score: 0.14;Polyphen-2: impact: benign, score: 0.028	Missense_Mutation	SNP	Diploid		NA	NA	NA	4	70146860	70146860	G	C	4:g.70146860G>C	ENST00000335568.5:c.642G>C							409	44713					52	CCLE	DSMZ	single round cells in suspention, some cells loosely adherent	ACH-000745			~ 40 hrs	Asian	0.1064		0	japan	80% RPMI 1640 + 20% h. i. FBS	Lymphoid_Neoplasm	plasma_cell_myeloma
Cancer Cell Line Encyclopedia (Broad, 2019)	2B4	MOLT16_HAEMATOPOIETIC_AND_LYMPHOID_TISSUE	T-Lymphoblastic Leukemia/Lymphoma	T-Lymphoblastic Leukemia/Lymphoma	R469C	OncoKB: NA;CIViC: NA;MyCancerGenome: not present;CancerHotspot: no;3DHotspot: no	SIFT: impact: deleterious, score: 0.03;Polyphen-2: impact: benign, score: 0.159	Missense_Mutation	SNP	Diploid	3	NA	NA	NA	4	70346534	70346534	G	A	4:g.70346534G>A	ENST00000305107.6:c.1405C>T							1247	44718					5	CCLE	DSMZ	round to elongated single cells growing in suspention	ACH-000918			~ 30 hrs	African_american	0.0608		0		80-90% RPMI 1640 +10-20% h. i. FBS	Lymphoid_Neoplasm	acute_lymphoblastic_T_cell_leukaemia
Cancer Cell Line Encyclopedia (Broad, 2019)	1A E2-5	MOLT3_HAEMATOPOIETIC_AND_LYMPHOID_TISSUE	T-Lymphoblastic Leukemia/Lymphoma	T-Lymphoblastic Leukemia/Lymphoma	R522Efs*22	OncoKB: NA;CIViC: NA;MyCancerGenome: not present;CancerHotspot: no;3DHotspot: no	SIFT: NA;Polyphen-2: NA	Frame_Shift_Del	DEL		2	NA	NA	NA	2	234681161	234681161	A	-	2:g.234681161del	ENST00000305139.6:c.1560del							1750	44686					19	COSMIC	PT-6ZZI	suspension	ACH-000964	leukaemia	50.9		Caucasian		5% DMSO			RPMI + 10 % FBS	Lymphoid_Neoplasm	acute_lymphoblastic_T_cell_leukaemia
Cancer Cell Line Encyclopedia (Broad, 2019)	2B17	MOLT4_HAEMATOPOIETIC_AND_LYMPHOID_TISSUE	T-Lymphoblastic Leukemia/Lymphoma	T-Lymphoblastic Leukemia/Lymphoma	E115*	OncoKB: NA;CIViC: NA;MyCancerGenome: not present;CancerHotspot: no;3DHotspot: no	SIFT: NA;Polyphen-2: NA	Nonsense_Mutation	DNP	Amp		NA	NA	NA	4	69433859	69433860	TC	CA	4:g.69433859_69433860delinsCA	ENST00000317746.2:c.343_344delinsTG							4963	44713					19	CCLE			ACH-001127	leukaemia			Caucasian	0.3126		1			Lymphoid_Neoplasm	acute_lymphoblastic_T_cell_leukaemia
Cancer Cell Line Encyclopedia (Broad, 2019)	2A3	MON_SOFT_TISSUE	Cancer of Unknown Primary	Cancer of Unknown Primary	M33I	OncoKB: NA;CIViC: NA;MyCancerGenome: not present;CancerHotspot: no;3DHotspot: no	SIFT: impact: tolerated, score: 0.12;Polyphen-2: impact: possibly_damaging, score: 0.725	Missense_Mutation	SNP			NA	NA	NA	4	69817380	69817380	C	T	4:g.69817380C>T	ENST00000251566.4:c.99G>A							209	44713									ACH-001128
Cancer Cell Line Encyclopedia (Broad, 2019)	1A10	MTA_HAEMATOPOIETIC_AND_LYMPHOID_TISSUE	Mixed Cancer Types	Mixed Cancer Types	E179G	OncoKB: NA;CIViC: NA;MyCancerGenome: not present;CancerHotspot: no;3DHotspot: no	SIFT: impact: tolerated, score: 0.1;Polyphen-2: impact: probably_damaging, score: 0.967	Missense_Mutation	SNP			NA	NA	NA	2	234545704	234545704	A	G	2:g.234545704A>G	ENST00000344644.5:c.536A>G							296	44682	3.1857e-05		rs557498592
Cancer Cell Line Encyclopedia (Broad, 2019)	1A5	MUTZ5_HAEMATOPOIETIC_AND_LYMPHOID_TISSUE	B-Lymphoblastic Leukemia/Lymphoma	B-Lymphoblastic Leukemia/Lymphoma	N73K	OncoKB: NA;CIViC: NA;MyCancerGenome: not present;CancerHotspot: no;3DHotspot: no	SIFT: NA;Polyphen-2: NA	Missense_Mutation	SNP	Diploid		NA	NA	NA	2	234621856	234621856	C	A	2:g.234621856C>A	ENST00000373414.3:c.219C>A							227	44682					26	CCLE	DSMZ	SUSPENSION	ACH-000492		279.2		Caucasian	0.0335	5% DMSO	0		RPMI-1640 +20% FBS	Lymphoid_Neoplasm	acute_lymphoblastic_B_cell_leukaemia
Cancer Cell Line Encyclopedia (Broad, 2019)	2B4	MYM12_HAEMATOPOIETIC_AND_LYMPHOID_TISSUE	Cancer of Unknown Primary	Cancer of Unknown Primary	S184Vfs*18	OncoKB: NA;CIViC: NA;MyCancerGenome: not present;CancerHotspot: no;3DHotspot: no	SIFT: NA;Polyphen-2: NA	Frame_Shift_Del	DEL			NA	NA	NA	4	70361030	70361030	T	-	4:g.70361030del	ENST00000305107.6:c.550del							217	44713									ACH-002276
Cancer Cell Line Encyclopedia (Broad, 2019)	3A2	MZ1PC_PANCREAS	Cancer of Unknown Primary	Cancer of Unknown Primary	Q332K	OncoKB: NA;CIViC: NA;MyCancerGenome: not present;CancerHotspot: no;3DHotspot: no	SIFT: impact: tolerated, score: 1;Polyphen-2: impact: benign, score: 0.007	Missense_Mutation	SNP			NA	NA	NA	5	36039660	36039660	G	T	5:g.36039660G>T	ENST00000282507.3:c.994C>A							258	44747									ACH-002164
Cancer Cell Line Encyclopedia (Broad, 2019)	2B15	MZ7MEL_SKIN	Cancer of Unknown Primary	Cancer of Unknown Primary	T261I	OncoKB: NA;CIViC: NA;MyCancerGenome: not present;CancerHotspot: no;3DHotspot: no	SIFT: impact: deleterious, score: 0;Polyphen-2: impact: possibly_damaging, score: 0.786	Missense_Mutation	SNP			NA	NA	NA	4	69533849	69533849	G	A	4:g.69533849G>A	ENST00000338206.5:c.782C>T							2192	44714									ACH-002166
Cancer Cell Line Encyclopedia (Broad, 2019)	1A7	NALM6_HAEMATOPOIETIC_AND_LYMPHOID_TISSUE	B-Lymphoblastic Leukemia/Lymphoma	B-Lymphoblastic Leukemia/Lymphoma	V57I	OncoKB: NA;CIViC: NA;MyCancerGenome: not present;CancerHotspot: no;3DHotspot: no	SIFT: NA;Polyphen-2: NA	Missense_Mutation	SNP	Diploid	1	NA	NA	NA	2	234590752	234590752	G	A	2:g.234590752G>A	ENST00000373426.3:c.169G>A							1783	44682					19	CCLE	DSMZ	single, small, round cells in suspention	ACH-000938			~ 36 hrs	Caucasian	0.0324		0		90% RPMI 1640 +10% h. i. FBS	Lymphoid_Neoplasm	acute_lymphoblastic_B_cell_leukaemia
Cancer Cell Line Encyclopedia (Broad, 2019)	2B15	NAMALWA_HAEMATOPOIETIC_AND_LYMPHOID_TISSUE	Mature B-Cell Neoplasms	Burkitt Lymphoma	E441D	OncoKB: NA;CIViC: NA;MyCancerGenome: not present;CancerHotspot: no;3DHotspot: no	SIFT: impact: deleterious, score: 0.03;Polyphen-2: impact: benign, score: 0.073	Missense_Mutation	SNP	Diploid		NA	NA	NA	4	69513092	69513092	C	A	4:g.69513092C>A	ENST00000338206.5:c.1323G>T							812	44718					3	CCLE	JCRB	Lymphoblast like; suspension	ACH-000944	lymphoma	54.1		African_american	0.2083	5% DMSO	0		RPMI-1640+10% FBS	Lymphoid_Neoplasm	Burkitt_lymphoma
Cancer Cell Line Encyclopedia (Broad, 2019)	2B7	NB13_AUTONOMIC_GANGLIA	Cancer of Unknown Primary	Cancer of Unknown Primary	T509Kfs*25	OncoKB: NA;CIViC: NA;MyCancerGenome: not present;CancerHotspot: no;3DHotspot: no	SIFT: NA;Polyphen-2: NA	Frame_Shift_Del	DEL			NA	NA	NA	4	69978390	69978390	C	-	4:g.69978390del	ENST00000305231.7:c.1526del							487	44718									ACH-002280
Cancer Cell Line Encyclopedia (Broad, 2019)	2B10	NB14_AUTONOMIC_GANGLIA	Cancer of Unknown Primary	Cancer of Unknown Primary	D434E	OncoKB: NA;CIViC: NA;MyCancerGenome: not present;CancerHotspot: no;3DHotspot: no	SIFT: impact: tolerated, score: 0.19;Polyphen-2: impact: benign, score: 0.031	Missense_Mutation	SNP		1	NA	NA	NA	4	69693261	69693261	T	A	4:g.69693261T>A	ENST00000265403.7:c.1302T>A							317	44717									ACH-002281
Cancer Cell Line Encyclopedia (Broad, 2019)	3A2	NB6_AUTONOMIC_GANGLIA	Cancer of Unknown Primary	Cancer of Unknown Primary	T469M	OncoKB: NA;CIViC: NA;MyCancerGenome: not present;CancerHotspot: no;3DHotspot: no	SIFT: impact: deleterious, score: 0.03;Polyphen-2: impact: benign, score: 0.436	Missense_Mutation	SNP		4	NA	NA	NA	5	36035966	36035966	G	A	5:g.36035966G>A	ENST00000282507.3:c.1406C>T							162	44749	9.90547e-05		rs199567567						ACH-002284
Cancer Cell Line Encyclopedia (Broad, 2019)	2B10	NB69_AUTONOMIC_GANGLIA	Cancer of Unknown Primary	Cancer of Unknown Primary	C281Y	OncoKB: NA;CIViC: NA;MyCancerGenome: not present;CancerHotspot: no;3DHotspot: no	SIFT: impact: deleterious, score: 0;Polyphen-2: impact: probably_damaging, score: 0.994	Missense_Mutation	SNP			NA	NA	NA	4	69683870	69683870	G	A	4:g.69683870G>A	ENST00000265403.7:c.842G>A							140	44714									ACH-002083
Cancer Cell Line Encyclopedia (Broad, 2019)	1A7	NBSUSSR_AUTONOMIC_GANGLIA	Cancer of Unknown Primary	Cancer of Unknown Primary	K27N	OncoKB: NA;CIViC: NA;MyCancerGenome: not present;CancerHotspot: no;3DHotspot: no	SIFT: NA;Polyphen-2: NA	Missense_Mutation	SNP			NA	NA	NA	2	234590664	234590664	G	C	2:g.234590664G>C	ENST00000373426.3:c.81G>C							310	44682									ACH-002340
Cancer Cell Line Encyclopedia (Broad, 2019)	2B15	NCIH1092_LUNG	Small Cell Lung Cancer	Small Cell Lung Cancer	D264Y	OncoKB: NA;CIViC: NA;MyCancerGenome: not present;CancerHotspot: no;3DHotspot: no	SIFT: impact: deleterious, score: 0;Polyphen-2: impact: probably_damaging, score: 0.91	Missense_Mutation	SNP	Diploid		NA	NA	NA	4	69533841	69533841	C	A	4:g.69533841C>A	ENST00000338206.5:c.790G>T							533	44714					67	CCLE	ATCC	Suspension	ACH-000514		107.4		Caucasian	0.6727	5%DMSO	1		RPMI-1640 + 5% FBS	Carcinoma	small_cell_carcinoma
Cancer Cell Line Encyclopedia (Broad, 2019)	1A10	NCIH1105_LUNG	Small Cell Lung Cancer	Small Cell Lung Cancer	E67G	OncoKB: NA;CIViC: NA;MyCancerGenome: not present;CancerHotspot: no;3DHotspot: no	SIFT: impact: tolerated, score: 0.56;Polyphen-2: impact: benign, score: 0	Missense_Mutation	SNP	Diploid		NA	NA	NA	2	234545368	234545368	A	G	2:g.234545368A>G	ENST00000344644.5:c.200A>G							773	44682	6.76289e-05		rs780692126		73	CCLE	ATCC	Suspension	ACH-000780		261.8		Caucasian	0.7957	5%DMSO	0		RPMI-1640 + 5% FBS	Carcinoma	small_cell_carcinoma
Cancer Cell Line Encyclopedia (Broad, 2019)	3A1	NCIH1155_LUNG	Non-Small Cell Lung Cancer	Non-Small Cell Lung Cancer	X103_splice	OncoKB: NA;CIViC: NA;MyCancerGenome: not present;CancerHotspot: no;3DHotspot: no	SIFT: NA;Polyphen-2: NA	Splice_Region	SNP	Diploid		NA	NA	NA	5	35968123	35968123	G	A	5:g.35968123G>A	ENST00000274278.3:c.309C>T							2022	44745					36	CCLE	ATCC	clusters in suspension	ACH-000980		53		Caucasian	0.1314	5% DMSO	1		DMEM:F12	Carcinoma	large_cell_carcinoma
Cancer Cell Line Encyclopedia (Broad, 2019)	1A3	NCIH1339_LUNG	Small Cell Lung Cancer	Small Cell Lung Cancer	M114K	OncoKB: NA;CIViC: NA;MyCancerGenome: not present;CancerHotspot: no;3DHotspot: no	SIFT: NA;Polyphen-2: NA	Missense_Mutation	SNP	Diploid		NA	NA	NA	2	234638113	234638113	T	A	2:g.234638113T>A	ENST00000482026.1:c.341T>A							1550	44682					49	CCLE	ATCC	Adherent	ACH-000921		83.3		African_american	0.4178	5%DMSO	0		RPMI+20%FBS	Carcinoma	small_cell_carcinoma
Cancer Cell Line Encyclopedia (Broad, 2019)	1A7	NCIH1355_LUNG	Non-Small Cell Lung Cancer	Non-Small Cell Lung Cancer	T240M	OncoKB: NA;CIViC: NA;MyCancerGenome: not present;CancerHotspot: no;3DHotspot: no	SIFT: NA;Polyphen-2: NA	Missense_Mutation	SNP	Diploid	1	NA	NA	NA	2	234591302	234591302	C	T	2:g.234591302C>T	ENST00000373426.3:c.719C>T							428	44682					53	CCLE	ATCC	Adherent	ACH-000666		157.4		Caucasian	0.5402	5% DMSO	1		DMEM/F12(1:1) +10 % FBS	Carcinoma	adenocarcinoma
Cancer Cell Line Encyclopedia (Broad, 2019)	2B11	NCIH1373_LUNG	Non-Small Cell Lung Cancer	Non-Small Cell Lung Cancer	Q93H	OncoKB: NA;CIViC: NA;MyCancerGenome: not present;CancerHotspot: no;3DHotspot: no	SIFT: impact: tolerated, score: 0.33;Polyphen-2: impact: benign, score: 0	Missense_Mutation	SNP	Diploid	1	NA	NA	NA	4	70080162	70080162	C	A	4:g.70080162C>A	ENST00000446444.1:c.279G>T							760	44713					56	CCLE	ATCC	adherent	ACH-000845		46.3		African_american	0.6181	5%DMSO	1		RPMI 1640 +10% FBS	Carcinoma	adenocarcinoma
Cancer Cell Line Encyclopedia (Broad, 2019)	UGT8	NCIH1436_LUNG	Small Cell Lung Cancer	Small Cell Lung Cancer	K298N	OncoKB: NA;CIViC: NA;MyCancerGenome: not present;CancerHotspot: no;3DHotspot: no	SIFT: impact: tolerated, score: 0.16;Polyphen-2: impact: benign, score: 0.115	Missense_Mutation	SNP	Diploid		NA	NA	NA	4	115585222	115585222	G	T	4:g.115585222G>T	ENST00000310836.6:c.894G>T							691	44715					39	CCLE	ATCC	suspension	ACH-000830		56.2		Caucasian	0.2543	5% DMSO	0		DMEM:F12(1:1) + 10%FBS	Carcinoma	small_cell_carcinoma
Cancer Cell Line Encyclopedia (Broad, 2019)	1A5	NCIH1568_LUNG	Non-Small Cell Lung Cancer	Non-Small Cell Lung Cancer	F101S	OncoKB: NA;CIViC: NA;MyCancerGenome: not present;CancerHotspot: no;3DHotspot: no	SIFT: NA;Polyphen-2: NA	Missense_Mutation	SNP	Diploid		NA	NA	NA	2	234621939	234621939	T	C	2:g.234621939T>C	ENST00000373414.3:c.302T>C							844	44682					48	CCLE	ATCC	adherent	ACH-000869		67		Caucasian	0.8206	5% DMSO	1		RPMI+10%FBS	Carcinoma	non_small_cell_carcinoma
Cancer Cell Line Encyclopedia (Broad, 2019)	1A E2-5	NCIH1573_LUNG	Non-Small Cell Lung Cancer	Non-Small Cell Lung Cancer	P453Q	OncoKB: NA;CIViC: NA;MyCancerGenome: not present;CancerHotspot: no;3DHotspot: no	SIFT: impact: deleterious, score: 0;Polyphen-2: impact: probably_damaging, score: 1	Missense_Mutation	SNP	Diploid		NA	NA	NA	2	234680964	234680964	C	A	2:g.234680964C>A	ENST00000305139.6:c.1358C>A							1567	44686					35	CCLE	ATCC	Adherent	ACH-000916		118.2		Caucasian	0.8552	5% DMSO	0		DMEM/F12(1:1) +10 % FBS	Carcinoma	adenocarcinoma
Cancer Cell Line Encyclopedia (Broad, 2019)	3A2	NCIH1623_LUNG	Non-Small Cell Lung Cancer	Non-Small Cell Lung Cancer	M1?	OncoKB: NA;CIViC: NA;MyCancerGenome: not present;CancerHotspot: no;3DHotspot: no	SIFT: impact: deleterious, score: 0;Polyphen-2: impact: possibly_damaging, score: 0.678	Translation_Start_Site	SNP	Diploid		NA	NA	NA	5	36066891	36066891	T	C	5:g.36066891T>C	ENST00000282507.3:c.1A>G							735	44743					58	CCLE	ATCC	Adherent, single cells and clusters loosely attached	ACH-000744		189.6		Caucasian	0.6844	5%DMSO	1		RPMI 1640+10%FBS	Carcinoma	adenocarcinoma
Cancer Cell Line Encyclopedia (Broad, 2019)	2B17	NCIH1650_LUNG	Non-Small Cell Lung Cancer	Non-Small Cell Lung Cancer	E441K	OncoKB: NA;CIViC: NA;MyCancerGenome: not present;CancerHotspot: no;3DHotspot: no	SIFT: impact: tolerated, score: 0.06;Polyphen-2: impact: benign, score: 0.414	Missense_Mutation	SNP	Diploid	1	NA	NA	NA	4	69403615	69403615	C	T	4:g.69403615C>T	ENST00000317746.2:c.1321G>A							129	44718					27	CCLE	ATCC	adherent; epithelial	ACH-000035	lung_cancer	52.2		Caucasian	0.2893	5%DMSO	1		RPMI+10%FBS	Carcinoma	bronchioloalveolar_adenocarcinoma
Cancer Cell Line Encyclopedia (Broad, 2019)	3A2	NCIH1651_LUNG	Non-Small Cell Lung Cancer	Non-Small Cell Lung Cancer	R5P	OncoKB: NA;CIViC: NA;MyCancerGenome: not present;CancerHotspot: no;3DHotspot: no	SIFT: impact: deleterious, score: 0.03;Polyphen-2: impact: possibly_damaging, score: 0.498	Missense_Mutation	SNP	Diploid		NA	NA	NA	5	36066878	36066878	C	G	5:g.36066878C>G	ENST00000282507.3:c.14G>C							999	44743					71	CCLE	ATCC	adherent	ACH-000893		138.7		Caucasian	0.7012	5% DMSO	2		DMEM:F12 (1:1) + 10% FBS	Carcinoma	adenocarcinoma
Cancer Cell Line Encyclopedia (Broad, 2019)	1A7	NCIH1688_LUNG	Cancer of Unknown Primary	Cancer of Unknown Primary	T240M	OncoKB: NA;CIViC: NA;MyCancerGenome: not present;CancerHotspot: no;3DHotspot: no	SIFT: NA;Polyphen-2: NA	Missense_Mutation	SNP		1	NA	NA	NA	2	234591302	234591302	C	T	2:g.234591302C>T	ENST00000373426.3:c.719C>T							502	44682									ACH-002170
Cancer Cell Line Encyclopedia (Broad, 2019)	1A8	NCIH1693_LUNG	Non-Small Cell Lung Cancer	Non-Small Cell Lung Cancer	A25T	OncoKB: NA;CIViC: NA;MyCancerGenome: not present;CancerHotspot: no;3DHotspot: no	SIFT: impact: tolerated, score: 0.06;Polyphen-2: impact: possibly_damaging, score: 0.883	Missense_Mutation	SNP	Diploid		NA	NA	NA	2	234526426	234526426	G	A	2:g.234526426G>A	ENST00000373450.4:c.73G>A							344	44682					55	CCLE	ATCC	Adherent	ACH-000021		94.7		Caucasian	0.6365	10%DMSO	1		RPMI1640+5%FBS	Carcinoma	adenocarcinoma
Cancer Cell Line Encyclopedia (Broad, 2019)	2B7	NCIH1694_LUNG	Small Cell Lung Cancer	Small Cell Lung Cancer	I76V	OncoKB: NA;CIViC: NA;MyCancerGenome: not present;CancerHotspot: no;3DHotspot: no	SIFT: impact: tolerated, score: 1;Polyphen-2: impact: benign, score: 0	Missense_Mutation	SNP	Diploid		NA	NA	NA	4	69962464	69962464	A	G	4:g.69962464A>G	ENST00000305231.7:c.226A>G							364	44713			rs1719241986		61	CCLE	ATCC	suspension line; lots of debris	ACH-000431		81.2		Caucasian	0.6697	5% DMSO	1		DMEM:F12 (1:1) + 5% FBS	Carcinoma	small_cell_carcinoma
Cancer Cell Line Encyclopedia (Broad, 2019)	3A2	NCIH1703_LUNG	Non-Small Cell Lung Cancer	Non-Small Cell Lung Cancer	H360N	OncoKB: NA;CIViC: NA;MyCancerGenome: not present;CancerHotspot: no;3DHotspot: no	SIFT: impact: deleterious, score: 0;Polyphen-2: impact: probably_damaging, score: 0.989	Missense_Mutation	SNP	Amp	1	NA	NA	NA	5	36038116	36038116	G	T	5:g.36038116G>T	ENST00000282507.3:c.1078C>A							599	44748					54	CCLE	ATCC	Adherent	ACH-000747	lung_cancer	41.1		Caucasian	0.5243	5% DMSO	1		RPMI+10%FBS	Carcinoma	adenocarcinoma
Cancer Cell Line Encyclopedia (Broad, 2019)	2B28	NCIH1734_LUNG	Non-Small Cell Lung Cancer	Non-Small Cell Lung Cancer	G279L	OncoKB: NA;CIViC: NA;MyCancerGenome: not present;CancerHotspot: no;3DHotspot: no	SIFT: impact: deleterious, score: 0;Polyphen-2: impact: probably_damaging, score: 0.999	Missense_Mutation	DNP	Diploid		NA	NA	NA	4	70148345	70148346	GG	TT	4:g.70148345_70148346delinsTT	ENST00000335568.5:c.835_836delinsTT							602	44714					56	CCLE	ATCC	Adherent	ACH-000675				Caucasian	0.8213	5%DMSO	1		RPMI-1640 +10% FBS	Carcinoma	adenocarcinoma
Cancer Cell Line Encyclopedia (Broad, 2019)	1A9	NCIH1755_LUNG	Non-Small Cell Lung Cancer	Non-Small Cell Lung Cancer	C183Y	OncoKB: NA;CIViC: NA;MyCancerGenome: not present;CancerHotspot: no;3DHotspot: no	SIFT: NA;Polyphen-2: NA	Missense_Mutation	SNP	Diploid		NA	NA	NA	2	234581128	234581128	G	A	2:g.234581128G>A	ENST00000354728.4:c.548G>A							305	44682					65	CCLE	ATCC	Mixed adherent and suspension	ACH-000282		41		Caucasian	0.5618	5%DMSO	1		RPMI 1640+10%FBS	Carcinoma	adenocarcinoma
Cancer Cell Line Encyclopedia (Broad, 2019)	2B28	NCIH1770_LUNG	Cancer of Unknown Primary	Cancer of Unknown Primary	P155S	OncoKB: NA;CIViC: NA;MyCancerGenome: not present;CancerHotspot: no;3DHotspot: no	SIFT: impact: deleterious, score: 0.04;Polyphen-2: impact: possibly_damaging, score: 0.718	Missense_Mutation	SNP		4	NA	NA	NA	4	70146681	70146681	C	T	4:g.70146681C>T	ENST00000335568.5:c.463C>T							1024	44713									ACH-001362
Cancer Cell Line Encyclopedia (Broad, 2019)	2A3	NCIH1836_LUNG	Small Cell Lung Cancer	Small Cell Lung Cancer	G493V	OncoKB: NA;CIViC: NA;MyCancerGenome: not present;CancerHotspot: no;3DHotspot: no	SIFT: impact: deleterious, score: 0.05;Polyphen-2: impact: possibly_damaging, score: 0.773	Missense_Mutation	SNP	Diploid		NA	NA	NA	4	69795637	69795637	C	A	4:g.69795637C>A	ENST00000251566.4:c.1478G>T							508	44718					52	CCLE	ATCC	Mixed Line	ACH-000559		183.9		Caucasian	0.4777	5%DMSO	1		DMEM:HAM's F12 1:1 + 5 % FBS	Carcinoma	small_cell_carcinoma
Cancer Cell Line Encyclopedia (Broad, 2019)	2B4	NCIH1869_LUNG	Non-Small Cell Lung Cancer	Non-Small Cell Lung Cancer	G364C	OncoKB: NA;CIViC: NA;MyCancerGenome: not present;CancerHotspot: no;3DHotspot: no	SIFT: impact: deleterious, score: 0;Polyphen-2: impact: probably_damaging, score: 1	Missense_Mutation	SNP	Diploid		NA	NA	NA	4	70352327	70352327	C	A	4:g.70352327C>A	ENST00000305107.6:c.1090G>T							378	44716					58	CCLE	ATCC	Adherent	ACH-000894		207.3		Caucasian	0.6517	5%DMSO	2		RPMI 1640+10%FBS	Carcinoma	squamous_cell_carcinoma
Cancer Cell Line Encyclopedia (Broad, 2019)	3A2	NCIH187_LUNG	Cancer of Unknown Primary	Cancer of Unknown Primary	R41W	OncoKB: NA;CIViC: NA;MyCancerGenome: not present;CancerHotspot: no;3DHotspot: no	SIFT: impact: deleterious, score: 0.02;Polyphen-2: impact: probably_damaging, score: 0.938	Missense_Mutation	SNP			NA	NA	NA	5	36064426	36064426	G	A	5:g.36064426G>A	ENST00000282507.3:c.121C>T							678	44744	3.8891e-05		rs531312336						ACH-001136
Cancer Cell Line Encyclopedia (Broad, 2019)	3A2	NCIH1876_LUNG	Small Cell Lung Cancer	Small Cell Lung Cancer	M141Wfs*2	OncoKB: NA;CIViC: NA;MyCancerGenome: not present;CancerHotspot: no;3DHotspot: no	SIFT: NA;Polyphen-2: NA	Frame_Shift_Del	DEL	Amp		NA	NA	NA	5	36049413	36049413	T	-	5:g.36049413del	ENST00000282507.3:c.421del							498	44746					59	CCLE	ATCC	Adherent epithelial	ACH-000586		72.5		Caucasian	0.8455	5%DMSO	1		DMEM:HAM's F12 1:1 +10% FBS	Carcinoma	small_cell_carcinoma
Cancer Cell Line Encyclopedia (Broad, 2019)	2A E2-6	NCIH1930_LUNG	Small Cell Lung Cancer	Small Cell Lung Cancer	C518Y	OncoKB: NA;CIViC: NA;MyCancerGenome: not present;CancerHotspot: no;3DHotspot: no	SIFT: impact: deleterious, score: 0;Polyphen-2: impact: possibly_damaging, score: 0.847	Missense_Mutation	SNP	Diploid		NA	NA	NA	4	70455148	70455148	C	T	4:g.70455148C>T	ENST00000457664.2:c.1553G>A							916	44718					41	CCLE	ATCC	Mixed line, majority in suspension	ACH-000870				Caucasian	0.5462	5%DMSO	1		RPMI 1640 +10% FBS	Carcinoma	small_cell_carcinoma
Cancer Cell Line Encyclopedia (Broad, 2019)	2A1	NCIH1944_LUNG	Non-Small Cell Lung Cancer	Non-Small Cell Lung Cancer	T17N	OncoKB: NA;CIViC: NA;MyCancerGenome: not present;CancerHotspot: no;3DHotspot: no	SIFT: impact: tolerated, score: 0.32;Polyphen-2: impact: benign, score: 0.005	Missense_Mutation	SNP	Diploid		NA	NA	NA	4	70513313	70513313	G	T	4:g.70513313G>T	ENST00000503640.1:c.50C>A							467	44713					62	CCLE	ATCC	Adherent	ACH-000414		70.1		Caucasian	0.1886	5%DMSO	0		RPMI+10%FBS	Carcinoma	non_small_cell_carcinoma
Cancer Cell Line Encyclopedia (Broad, 2019)	2B11	NCIH1963_LUNG	Small Cell Lung Cancer	Small Cell Lung Cancer	S421L	OncoKB: NA;CIViC: NA;MyCancerGenome: not present;CancerHotspot: no;3DHotspot: no	SIFT: impact: deleterious, score: 0;Polyphen-2: impact: probably_damaging, score: 0.91	Missense_Mutation	SNP	Diploid		NA	NA	NA	4	70070196	70070196	G	A	4:g.70070196G>A	ENST00000446444.1:c.1262C>T							385	44717					56	CCLE	ATCC	Suspension	ACH-000729				African_american	0.2944	5% DMSO	0		RPMI-1640+10%FBS	Carcinoma	small_cell_carcinoma
Cancer Cell Line Encyclopedia (Broad, 2019)	1A4	NCIH2009_LUNG	Non-Small Cell Lung Cancer	Non-Small Cell Lung Cancer	R91G	OncoKB: NA;CIViC: NA;MyCancerGenome: not present;CancerHotspot: no;3DHotspot: no	SIFT: NA;Polyphen-2: NA	Missense_Mutation	SNP	Diploid		NA	NA	NA	2	234627737	234627737	C	G	2:g.234627737C>G	ENST00000373409.3:c.271C>G							887	44682					68	CCLE	ATCC		ACH-000886	lung_cancer	53.7		Caucasian	0.4561	5%DMSO	1		DMEM:HAM's F12 1:1 +5% FBS	Carcinoma	adenocarcinoma
Cancer Cell Line Encyclopedia (Broad, 2019)	1A7	NCIH2023_LUNG	Non-Small Cell Lung Cancer	Non-Small Cell Lung Cancer	R206I	OncoKB: NA;CIViC: NA;MyCancerGenome: not present;CancerHotspot: no;3DHotspot: no	SIFT: NA;Polyphen-2: NA	Missense_Mutation	SNP	Diploid		NA	NA	NA	2	234591200	234591200	G	T	2:g.234591200G>T	ENST00000373426.3:c.617G>T							646	44682					26	CCLE	ATCC	adherent	ACH-000781				Caucasian	0.6104	5% DMSO	1		DMEM:HAM's F12 1:1 + 5 % FBS	Carcinoma	adenocarcinoma
Cancer Cell Line Encyclopedia (Broad, 2019)	2B10	NCIH2066_LUNG	Small Cell Lung Cancer	Small Cell Lung Cancer	R209M	OncoKB: NA;CIViC: NA;MyCancerGenome: not present;CancerHotspot: no;3DHotspot: no	SIFT: impact: deleterious, score: 0;Polyphen-2: impact: probably_damaging, score: 0.995	Missense_Mutation	SNP			NA	NA	NA	4	69682363	69682363	G	T	4:g.69682363G>T	ENST00000265403.7:c.626G>T							607	44713					70	CCLE	ATCC		ACH-000727		80.3		Caucasian	0.3875	5%DMSO	1		DMEM:HAM's F12 1:1 (ATCC catalog # 30-2006) + 5% FBS	Carcinoma	small_cell_carcinoma
Cancer Cell Line Encyclopedia (Broad, 2019)	2B10	NCIH2081_LUNG	Small Cell Lung Cancer	Small Cell Lung Cancer	L62I	OncoKB: NA;CIViC: NA;MyCancerGenome: not present;CancerHotspot: no;3DHotspot: no	SIFT: impact: tolerated, score: 0.15;Polyphen-2: impact: benign, score: 0.046	Missense_Mutation	SNP		3	NA	NA	NA	4	69681921	69681921	C	A	4:g.69681921C>A	ENST00000265403.7:c.184C>A							445	44713					59	CCLE	NIBRI		ACH-000394				Caucasian	0.675		1			Carcinoma	small_cell_carcinoma
Cancer Cell Line Encyclopedia (Broad, 2019)	2B10	NCIH2087_LUNG	Non-Small Cell Lung Cancer	Non-Small Cell Lung Cancer	G386L	OncoKB: NA;CIViC: NA;MyCancerGenome: not present;CancerHotspot: no;3DHotspot: no	SIFT: impact: deleterious, score: 0.02;Polyphen-2: impact: probably_damaging, score: 0.999	Missense_Mutation	DNP			NA	NA	NA	4	69693115	69693116	GG	TT	4:g.69693115_69693116delinsTT	ENST00000265403.7:c.1156_1157delinsTT							677	44717					69	CCLE	ATCC		ACH-000841	lung_cancer	104.2		Caucasian	0.6178	5% DMSO	1		DMEM:F12 (1:1) + 10% FBS	Carcinoma	adenocarcinoma
Cancer Cell Line Encyclopedia (Broad, 2019)	1A1	NCIH211_LUNG	Small Cell Lung Cancer	Small Cell Lung Cancer	F170Y	OncoKB: NA;CIViC: NA;MyCancerGenome: not present;CancerHotspot: no;3DHotspot: no	SIFT: NA;Polyphen-2: NA	Missense_Mutation	SNP	Diploid		NA	NA	NA	2	234669442	234669442	T	A	2:g.234669442T>A	ENST00000305208.5:c.509T>A							436	44682					50	CCLE	ATCC	Suspension	ACH-000639		176		Caucasian	0.6746	5% DMSO	0		RPMI-1640+10%FBS	Carcinoma	small_cell_carcinoma
Cancer Cell Line Encyclopedia (Broad, 2019)	UGT8	NCIH2110_LUNG	Non-Small Cell Lung Cancer	Non-Small Cell Lung Cancer	I368V	OncoKB: NA;CIViC: NA;MyCancerGenome: not present;CancerHotspot: no;3DHotspot: no	SIFT: impact: tolerated, score: 0.08;Polyphen-2: impact: benign, score: 0.078	Missense_Mutation	SNP	Diploid	1	NA	NA	NA	4	115589300	115589300	A	G	4:g.115589300A>G	ENST00000310836.6:c.1102A>G							1729	44717						CCLE	GNF		ACH-000929				African_american	0.6907		1			Carcinoma	non_small_cell_carcinoma
Cancer Cell Line Encyclopedia (Broad, 2019)	2B17	NCIH2126_LUNG	Non-Small Cell Lung Cancer	Non-Small Cell Lung Cancer	K356Sfs*18	OncoKB: NA;CIViC: NA;MyCancerGenome: not present;CancerHotspot: no;3DHotspot: no	SIFT: NA;Polyphen-2: NA	Frame_Shift_Del	DEL	Diploid		NA	NA	NA	4	69417568	69417568	T	-	4:g.69417568del	ENST00000317746.2:c.1067del							747	44716					65	CCLE	ATCC	adherent epithelial	ACH-000785	lung_cancer	423.2		Caucasian	0.5431	5%DMSO	2		DMEM:HAM's F12 1:1 +5% FBS	Carcinoma	adenocarcinoma
Cancer Cell Line Encyclopedia (Broad, 2019)	2B11	NCIH2228_LUNG	Non-Small Cell Lung Cancer	Non-Small Cell Lung Cancer	X53_splice	OncoKB: NA;CIViC: NA;MyCancerGenome: not present;CancerHotspot: no;3DHotspot: no	SIFT: impact: tolerated, score: 0.15;Polyphen-2: impact: benign, score: 0.367	Splice_Site	SNP	Diploid		NA	NA	NA	4	70066297	70066297	G	C	4:g.70066297G>C	ENST00000446444.1:c.1451C>G							322	44718						CCLE		AHDHERENT; `	ACH-000447		88.8		Caucasian	0.581	5%DMSO	1		RPMI-1640+10%FBS	Carcinoma	adenocarcinoma
Cancer Cell Line Encyclopedia (Broad, 2019)	2A E2-6	NCIH2286_LUNG	Small Cell Lung Cancer	Small Cell Lung Cancer	M450I	OncoKB: NA;CIViC: NA;MyCancerGenome: not present;CancerHotspot: no;3DHotspot: no	SIFT: impact: deleterious, score: 0.02;Polyphen-2: impact: benign, score: 0.003	Missense_Mutation	SNP	Diploid		NA	NA	NA	4	70455351	70455351	C	A	4:g.70455351C>A	ENST00000457664.2:c.1350G>T							1408	44718					57	CCLE			ACH-000912		77.8		Caucasian	0.308		0			Carcinoma	small_cell_carcinoma
Cancer Cell Line Encyclopedia (Broad, 2019)	3A2	NCIH23_LUNG	Non-Small Cell Lung Cancer	Non-Small Cell Lung Cancer	P65Qfs*37	OncoKB: NA;CIViC: NA;MyCancerGenome: not present;CancerHotspot: no;3DHotspot: no	SIFT: NA;Polyphen-2: NA	Frame_Shift_Del	DEL	Amp	1	NA	NA	NA	5	36064353	36064353	G	-	5:g.36064353del	ENST00000282507.3:c.194del							1095	44744					51	CCLE	ATCC	adherent	ACH-000900	non_small_cell_lung_cancer	58.6		African_american	0.7685	5% DMSO	1		RPMI 1640 + 10% FBS	Carcinoma	non_small_cell_carcinoma
Cancer Cell Line Encyclopedia (Broad, 2019)	2A E2-6	NCIH2342_LUNG	Non-Small Cell Lung Cancer	Non-Small Cell Lung Cancer	G317V	OncoKB: NA;CIViC: NA;MyCancerGenome: not present;CancerHotspot: no;3DHotspot: no	SIFT: NA;Polyphen-2: NA	Missense_Mutation	SNP	Diploid		NA	NA	NA	4	70462041	70462041	C	A	4:g.70462041C>A	ENST00000457664.2:c.950G>T							2226	44715					55	CCLE	ATCC	mix	ACH-000951		324.8		Caucasian	0.6101	5 % DMSO	2		DMEM:F12(1:1) + 10%FBS	Carcinoma	adenocarcinoma
Cancer Cell Line Encyclopedia (Broad, 2019)	2B28	NCIH2347_LUNG	Non-Small Cell Lung Cancer	Non-Small Cell Lung Cancer	G278E	OncoKB: NA;CIViC: NA;MyCancerGenome: not present;CancerHotspot: no;3DHotspot: no	SIFT: impact: deleterious, score: 0;Polyphen-2: impact: probably_damaging, score: 0.999	Missense_Mutation	SNP	Diploid		NA	NA	NA	4	70148343	70148343	G	A	4:g.70148343G>A	ENST00000335568.5:c.833G>A							916	44714					54	CCLE	ATCC	Mixed, majority adherent	ACH-000875	lung_cancer	181.8		Caucasian	0.522	5%DMSO	0		RPMI 1640 +10% FBS	Carcinoma	adenocarcinoma
Cancer Cell Line Encyclopedia (Broad, 2019)	1A4	NCIH2373_PLEURA	Cancer of Unknown Primary	Cancer of Unknown Primary	N155H	OncoKB: NA;CIViC: NA;MyCancerGenome: not present;CancerHotspot: no;3DHotspot: no	SIFT: NA;Polyphen-2: NA	Missense_Mutation	SNP			NA	NA	NA	2	234627929	234627929	A	C	2:g.234627929A>C	ENST00000373409.3:c.463A>C							140	44682									ACH-002124
Cancer Cell Line Encyclopedia (Broad, 2019)	1A8	NCIH2405_LUNG	Non-Small Cell Lung Cancer	Non-Small Cell Lung Cancer	G67E	OncoKB: NA;CIViC: NA;MyCancerGenome: not present;CancerHotspot: no;3DHotspot: no	SIFT: impact: tolerated, score: 0.42;Polyphen-2: impact: benign, score: 0.03	Missense_Mutation	SNP	Diploid	1	NA	NA	NA	2	234526553	234526553	G	A	2:g.234526553G>A	ENST00000373450.4:c.200G>A							179	44682					47	CCLE			ACH-000121				Caucasian	0.3309		0			Carcinoma	adenocarcinoma
Cancer Cell Line Encyclopedia (Broad, 2019)	2A3	NCIH250_LUNG	Cancer of Unknown Primary	Cancer of Unknown Primary	G390*	OncoKB: NA;CIViC: NA;MyCancerGenome: not present;CancerHotspot: no;3DHotspot: no	SIFT: NA;Polyphen-2: NA	Nonsense_Mutation	SNP			NA	NA	NA	4	69796400	69796400	C	A	4:g.69796400C>A	ENST00000251566.4:c.1168G>T							698	44717									ACH-002171
Cancer Cell Line Encyclopedia (Broad, 2019)	3A1	NCIH28_PLEURA	Mesothelioma	Pleural Mesothelioma, Epithelioid Type	L113Q	OncoKB: NA;CIViC: NA;MyCancerGenome: not present;CancerHotspot: no;3DHotspot: no	SIFT: impact: deleterious, score: 0.01;Polyphen-2: impact: possibly_damaging, score: 0.866	Missense_Mutation	SNP	Diploid		NA	NA	NA	5	35965993	35965993	A	T	5:g.35965993A>T	ENST00000274278.3:c.338T>A							293	44746					48	CCLE	ATCC	adherent	ACH-000648		81.2		African_american	0.5526	10% DMSO	1		RPMI+10%FBS	Mesothelioma	NS
Cancer Cell Line Encyclopedia (Broad, 2019)	2A3	NCIH2810_PLEURA	Cancer of Unknown Primary	Cancer of Unknown Primary	Y225H	OncoKB: NA;CIViC: NA;MyCancerGenome: not present;CancerHotspot: no;3DHotspot: no	SIFT: impact: tolerated, score: 0.07;Polyphen-2: impact: benign, score: 0.037	Missense_Mutation	SNP			NA	NA	NA	4	69816806	69816806	A	G	4:g.69816806A>G	ENST00000251566.4:c.673T>C							99	44713									ACH-002133
Cancer Cell Line Encyclopedia (Broad, 2019)	1A10	NCIH292_LUNG	Non-Small Cell Lung Cancer	Non-Small Cell Lung Cancer	M91T	OncoKB: NA;CIViC: NA;MyCancerGenome: not present;CancerHotspot: no;3DHotspot: no	SIFT: impact: tolerated, score: 0.7;Polyphen-2: impact: benign, score: 0.062	Missense_Mutation	SNP	Diploid		NA	NA	NA	2	234545440	234545440	T	C	2:g.234545440T>C	ENST00000344644.5:c.272T>C							270	44682	3.18289e-05		rs141009803		32	CCLE	NIBRI		ACH-001075				African_american	0.1954		0			Carcinoma	mucoepidermoid_carcinoma
Cancer Cell Line Encyclopedia (Broad, 2019)	2A3	NCIH322_LUNG	Non-Small Cell Lung Cancer	Non-Small Cell Lung Cancer	E160*	OncoKB: NA;CIViC: NA;MyCancerGenome: not present;CancerHotspot: no;3DHotspot: no	SIFT: NA;Polyphen-2: NA	Nonsense_Mutation	SNP	Diploid		NA	NA	NA	4	69817001	69817001	C	A	4:g.69817001C>A	ENST00000251566.4:c.478G>T							649	44713					52	CCLE	EACC	Adherent	ACH-000837	lung_cancer	60.7		Caucasian	0.4158		1		RPMI1640+10%FBS	Carcinoma	adenocarcinoma
Cancer Cell Line Encyclopedia (Broad, 2019)	2B4	NCIH358_LUNG	Non-Small Cell Lung Cancer	Non-Small Cell Lung Cancer	D233G	OncoKB: NA;CIViC: NA;MyCancerGenome: not present;CancerHotspot: no;3DHotspot: no	SIFT: impact: deleterious, score: 0.02;Polyphen-2: impact: possibly_damaging, score: 0.803	Missense_Mutation	SNP	Diploid		NA	NA	NA	4	70360882	70360882	T	C	4:g.70360882T>C	ENST00000305107.6:c.698A>G							1231	44713						CCLE	ATCC	adherenet	ACH-000860	bronchioalveolar_carcinoma; non-small_cell lung_cancer	73.9		Caucasian	0.5624	5%DMSO	1		RPMI+10%FBS	Carcinoma	bronchioloalveolar_adenocarcinoma
Cancer Cell Line Encyclopedia (Broad, 2019)	2B28	NCIH378_LUNG	Cancer of Unknown Primary	Cancer of Unknown Primary	M420I	OncoKB: NA;CIViC: NA;MyCancerGenome: not present;CancerHotspot: no;3DHotspot: no	SIFT: impact: tolerated, score: 0.06;Polyphen-2: impact: benign, score: 0.321	Missense_Mutation	SNP			NA	NA	NA	4	70156479	70156479	G	A	4:g.70156479G>A	ENST00000335568.5:c.1260G>A							369	44717									ACH-002173
Cancer Cell Line Encyclopedia (Broad, 2019)	2B4	NCIH441_LUNG	Non-Small Cell Lung Cancer	Non-Small Cell Lung Cancer	L347*	OncoKB: NA;CIViC: NA;MyCancerGenome: not present;CancerHotspot: no;3DHotspot: no	SIFT: NA;Polyphen-2: NA	Frame_Shift_Del	DEL	Diploid		NA	NA	NA	4	70352377	70352377	A	-	4:g.70352377del	ENST00000305107.6:c.1040del							580	44716						CCLE	ATCC	Adherent; DT=58hrs	ACH-000638		279	58	Caucasian	0.6131	5% DMSO	1		RPMI-1640+10%FBS	Carcinoma	adenocarcinoma
Cancer Cell Line Encyclopedia (Broad, 2019)	1A7	NCIH446_LUNG	Small Cell Lung Cancer	Small Cell Lung Cancer	R254*	OncoKB: NA;CIViC: NA;MyCancerGenome: not present;CancerHotspot: no;3DHotspot: no	SIFT: NA;Polyphen-2: NA	Nonsense_Mutation	SNP	Diploid	2	NA	NA	NA	2	234591343	234591343	C	T	2:g.234591343C>T	ENST00000373426.3:c.760C>T							956	44682					61	CCLE	ATCC	Mixed; adherent and suspension	ACH-000800		294		Caucasian	0.5109	5% DMSO	1		RPMI-1640+10%FBS	Carcinoma	small_cell_carcinoma
Cancer Cell Line Encyclopedia (Broad, 2019)	3A2	NCIH510_LUNG	Small Cell Lung Cancer	Small Cell Lung Cancer	F210Y	OncoKB: NA;CIViC: NA;MyCancerGenome: not present;CancerHotspot: no;3DHotspot: no	SIFT: impact: tolerated, score: 0.16;Polyphen-2: impact: probably_damaging, score: 0.952	Missense_Mutation	SNP	Diploid		NA	NA	NA	5	36049205	36049205	A	T	5:g.36049205A>T	ENST00000282507.3:c.629T>A							1180	44746					56	CCLE	ATCC	mixed line	ACH-000871		979		Caucasian	0.6663	5% DMSO	1		F-12K ATCC + 10% FBS	Carcinoma	small_cell_carcinoma
Cancer Cell Line Encyclopedia (Broad, 2019)	2B17	NCIH513_PLEURA	Cancer of Unknown Primary	Cancer of Unknown Primary	T98I	OncoKB: NA;CIViC: NA;MyCancerGenome: not present;CancerHotspot: no;3DHotspot: no	SIFT: impact: tolerated, score: 1;Polyphen-2: impact: benign, score: 0	Missense_Mutation	SNP			NA	NA	NA	4	69433910	69433910	G	A	4:g.69433910G>A	ENST00000317746.2:c.293C>T							1997	44713									ACH-002341
Cancer Cell Line Encyclopedia (Broad, 2019)	2B15	NCIH520_LUNG	Non-Small Cell Lung Cancer	Non-Small Cell Lung Cancer	M209T	OncoKB: NA;CIViC: NA;MyCancerGenome: not present;CancerHotspot: no;3DHotspot: no	SIFT: impact: tolerated, score: 0.22;Polyphen-2: impact: benign, score: 0.005	Missense_Mutation	SNP	Diploid		NA	NA	NA	4	69535711	69535711	A	G	4:g.69535711A>G	ENST00000338206.5:c.626T>C							390	44713						CCLE	ATCC	ADHERENT EPITHELIAL;	ACH-000395		47.3		Caucasian	0.6852	5%DMSO	1		RPMI-1640+10% FBS	Carcinoma	squamous_cell_carcinoma
Cancer Cell Line Encyclopedia (Broad, 2019)	2B11	NCIH522_LUNG	Non-Small Cell Lung Cancer	Non-Small Cell Lung Cancer	E293G	OncoKB: NA;CIViC: NA;MyCancerGenome: not present;CancerHotspot: no;3DHotspot: no	SIFT: impact: deleterious, score: 0.01;Polyphen-2: impact: probably_damaging, score: 0.975	Missense_Mutation	SNP	Diploid		NA	NA	NA	4	70074193	70074193	T	C	4:g.70074193T>C	ENST00000446444.1:c.878A>G							262	44715					60	CCLE	GNF		ACH-000343	lung_cancer			Caucasian	0.6484		1			Carcinoma	non_small_cell_carcinoma
Cancer Cell Line Encyclopedia (Broad, 2019)	2B4	NCIH526_LUNG	Small Cell Lung Cancer	Small Cell Lung Cancer	Q452*	OncoKB: NA;CIViC: NA;MyCancerGenome: not present;CancerHotspot: no;3DHotspot: no	SIFT: NA;Polyphen-2: NA	Nonsense_Mutation	SNP	Diploid		NA	NA	NA	4	70346585	70346585	G	A	4:g.70346585G>A	ENST00000305107.6:c.1354C>T							497	44718					55	CCLE	ATCC	round clusters in suspension	ACH-000767	lung_cancer	315		Caucasian	0.5006	5% DMSO	1		RPMI-1640+10%FBS	Carcinoma	small_cell_carcinoma
Cancer Cell Line Encyclopedia (Broad, 2019)	2B10	NCIH596_LUNG	Non-Small Cell Lung Cancer	Non-Small Cell Lung Cancer	A284E	OncoKB: NA;CIViC: NA;MyCancerGenome: not present;CancerHotspot: no;3DHotspot: no	SIFT: impact: deleterious, score: 0;Polyphen-2: impact: probably_damaging, score: 0.979	Missense_Mutation	DNP		1	NA	NA	NA	4	69683879	69683880	CC	AA	4:g.69683879_69683880delinsAA	ENST00000265403.7:c.851_852delinsAA							406	44714					73	CCLE	ATCC	adherent	ACH-000628		156.9		Caucasian	0.5852	5% DMSO	1		RPMI-1640+10% FBS	Carcinoma	mixed_adenosquamous_carcinoma
Cancer Cell Line Encyclopedia (Broad, 2019)	1A10	NCIH630_LARGE_INTESTINE	Cancer of Unknown Primary	Cancer of Unknown Primary	S43P	OncoKB: NA;CIViC: NA;MyCancerGenome: not present;CancerHotspot: no;3DHotspot: no	SIFT: impact: tolerated, score: 0.34;Polyphen-2: impact: benign, score: 0.038	Missense_Mutation	SNP			NA	NA	NA	2	234545295	234545295	T	C	2:g.234545295T>C	ENST00000344644.5:c.127T>C							2247	44682									ACH-002287
Cancer Cell Line Encyclopedia (Broad, 2019)	2B10	NCIH650_LUNG	Non-Small Cell Lung Cancer	Non-Small Cell Lung Cancer	V129A	OncoKB: NA;CIViC: NA;MyCancerGenome: not present;CancerHotspot: no;3DHotspot: no	SIFT: impact: tolerated, score: 0.61;Polyphen-2: impact: benign, score: 0.011	Missense_Mutation	SNP			NA	NA	NA	4	69682123	69682123	T	C	4:g.69682123T>C	ENST00000265403.7:c.386T>C							2522	44713						CCLE	ATCC	Mixed cells	ACH-000945		90.6		Caucasian	0.5326	5% DMSO	2		DMEM:F12	Carcinoma	bronchioloalveolar_adenocarcinoma
Cancer Cell Line Encyclopedia (Broad, 2019)	2B7	NCIH661_LUNG	Non-Small Cell Lung Cancer	Non-Small Cell Lung Cancer	V501E	OncoKB: NA;CIViC: NA;MyCancerGenome: not present;CancerHotspot: no;3DHotspot: no	SIFT: impact: deleterious, score: 0;Polyphen-2: impact: possibly_damaging, score: 0.662	Missense_Mutation	SNP	Diploid		NA	NA	NA	4	69978366	69978366	T	A	4:g.69978366T>A	ENST00000305231.7:c.1502T>A							811	44718					43	CCLE	ATCC	adherent	ACH-000853	large_cell_lung_cancer	59.5		Caucasian	0.5742	5%DMSO	0		RPMI 1640+10%FBS	Carcinoma	large_cell_carcinoma
Cancer Cell Line Encyclopedia (Broad, 2019)	2B4	NCIH740_LUNG	Cancer of Unknown Primary	Cancer of Unknown Primary	V217L	OncoKB: NA;CIViC: NA;MyCancerGenome: not present;CancerHotspot: no;3DHotspot: no	SIFT: impact: tolerated, score: 0.42;Polyphen-2: impact: benign, score: 0.12	Missense_Mutation	SNP			NA	NA	NA	4	70360931	70360931	C	A	4:g.70360931C>A	ENST00000305107.6:c.649G>T							687	44713									ACH-002175
Cancer Cell Line Encyclopedia (Broad, 2019)	3A2	NCIH889_LUNG	Small Cell Lung Cancer	Small Cell Lung Cancer	K91R	OncoKB: NA;CIViC: NA;MyCancerGenome: not present;CancerHotspot: no;3DHotspot: no	SIFT: impact: tolerated, score: 0.08;Polyphen-2: impact: benign, score: 0.025	Missense_Mutation	SNP	Diploid		NA	NA	NA	5	36052011	36052011	T	C	5:g.36052011T>C	ENST00000282507.3:c.272A>G							295	44745			rs143985161		69	CCLE	ATCC	clusters in suspension	ACH-000297				Caucasian	0.5915	5% DMSO	1		RPMI-1640+10%FBS	Carcinoma	small_cell_carcinoma
Cancer Cell Line Encyclopedia (Broad, 2019)	2B10	NEC8_TESTIS	Cancer of Unknown Primary	Cancer of Unknown Primary	P268Q	OncoKB: NA;CIViC: NA;MyCancerGenome: not present;CancerHotspot: no;3DHotspot: no	SIFT: impact: deleterious, score: 0;Polyphen-2: impact: probably_damaging, score: 0.998	Missense_Mutation	SNP			NA	NA	NA	4	69683831	69683831	C	A	4:g.69683831C>A	ENST00000265403.7:c.803C>A							297	44714									ACH-002288
Cancer Cell Line Encyclopedia (Broad, 2019)	1A9	NH6_AUTONOMIC_GANGLIA	Neuroblastoma	Peripheral Nervous System	N71S	OncoKB: NA;CIViC: NA;MyCancerGenome: not present;CancerHotspot: no;3DHotspot: no	SIFT: NA;Polyphen-2: NA	Missense_Mutation	SNP	Diploid		NA	NA	NA	2	234580792	234580792	A	G	2:g.234580792A>G	ENST00000354728.4:c.212A>G							223	44682					0.75	CCLE	HSSRB	fibroblast-like	ACH-000203	neuroblastoma			Asian	0.0846		0		alpha-MEM with 10% fetal calf serum	Neuroblastoma	NS
Cancer Cell Line Encyclopedia (Broad, 2019)	UGT8	NUGC3_STOMACH	Esophagogastric Cancer	Esophageal Squamous Cell Carcinoma	R314Dfs*6	OncoKB: NA;CIViC: NA;MyCancerGenome: not present;CancerHotspot: no;3DHotspot: no	SIFT: NA;Polyphen-2: NA	Frame_Shift_Del	DEL	Diploid		NA	NA	NA	4	115585264	115585264	G	-	4:g.115585264del	ENST00000310836.6:c.939del							1196	44715					72	CCLE	JHSF	Epithelial-like	ACH-000911		34.2		Asian	0.837	5%DMSO	1		RPMI1640+10%FBS	Carcinoma	NS
Cancer Cell Line Encyclopedia (Broad, 2019)	1A3	OC314_OVARY	Ovarian Cancer	Ovarian Carcinosarcoma/Malignant Mixed Mesodermal Tumor	L173Ffs*2	OncoKB: NA;CIViC: NA;MyCancerGenome: not present;CancerHotspot: no;3DHotspot: no	SIFT: NA;Polyphen-2: NA	Frame_Shift_Ins	INS	Diploid	5	NA	NA	NA	2	234638282	234638283	-	TT	2:g.234638282_234638283insTT	ENST00000482026.1:c.517_518dup							2513	44682					39	CCLE	ICLC	Epithelial-like grown in monolayer	ACH-000962		41.8		Caucasian	0.2585	5	1		RPMI+10%FBS	Carcinoma	serous_carcinoma
Cancer Cell Line Encyclopedia (Broad, 2019)	2A1	OCIAML5_HAEMATOPOIETIC_AND_LYMPHOID_TISSUE	Leukemia	Acute Myeloid Leukemia	Y221H	OncoKB: NA;CIViC: NA;MyCancerGenome: not present;CancerHotspot: no;3DHotspot: no	SIFT: impact: deleterious, score: 0.01;Polyphen-2: impact: benign, score: 0.073	Missense_Mutation	SNP	Diploid		NA	NA	NA	4	70512702	70512702	A	G	4:g.70512702A>G	ENST00000503640.1:c.661T>C							955	44713					77	CCLE	DSMZ	round cells growing singly or in clumps in suspention	ACH-000065			~ 30-50 hrs	Caucasian	0.1241		0		70% alpha-MEM + 20% h. i. FBS	Haematopoietic_Neoplasm	acute_myeloid_leukaemia
Cancer Cell Line Encyclopedia (Broad, 2019)	2B28	OCILY12_HAEMATOPOIETIC_AND_LYMPHOID_TISSUE	Mixed Cancer Types	Mixed Cancer Types	D424G	OncoKB: NA;CIViC: NA;MyCancerGenome: not present;CancerHotspot: no;3DHotspot: no	SIFT: impact: deleterious, score: 0;Polyphen-2: impact: possibly_damaging, score: 0.719	Missense_Mutation	SNP			NA	NA	NA	4	70156490	70156490	A	G	4:g.70156490A>G	ENST00000335568.5:c.1271A>G							391	44717
Cancer Cell Line Encyclopedia (Broad, 2019)	2B17	OCILY132_HAEMATOPOIETIC_AND_LYMPHOID_TISSUE	Mixed Cancer Types	Mixed Cancer Types	Y99D	OncoKB: NA;CIViC: NA;MyCancerGenome: not present;CancerHotspot: no;3DHotspot: no	SIFT: impact: tolerated, score: 0.07;Polyphen-2: impact: benign, score: 0.045	Missense_Mutation	SNP			NA	NA	NA	4	69433908	69433908	A	C	4:g.69433908A>C	ENST00000317746.2:c.295T>G							200	44713
Cancer Cell Line Encyclopedia (Broad, 2019)	3A2	OCILY7_HAEMATOPOIETIC_AND_LYMPHOID_TISSUE	Cancer of Unknown Primary	Cancer of Unknown Primary	S435Y	OncoKB: NA;CIViC: NA;MyCancerGenome: not present;CancerHotspot: no;3DHotspot: no	SIFT: impact: deleterious, score: 0;Polyphen-2: impact: probably_damaging, score: 0.968	Missense_Mutation	SNP			NA	NA	NA	5	36036068	36036068	G	T	5:g.36036068G>T	ENST00000282507.3:c.1304C>A							154	44749	4.01123e-06		rs61729692						ACH-001617
Cancer Cell Line Encyclopedia (Broad, 2019)	1A6	OE21_OESOPHAGUS	Esophagogastric Cancer	Esophageal Adenocarcinoma	V250A	OncoKB: NA;CIViC: NA;MyCancerGenome: not present;CancerHotspot: no;3DHotspot: no	SIFT: impact: tolerated, score: 1;Polyphen-2: impact: benign, score: 0.001	Missense_Mutation	SNP	Diploid		NA	NA	NA	2	234602399	234602399	T	C	2:g.234602399T>C	ENST00000305139.6:c.749T>C							266	44682					74	CCLE	HPACC	ADHERENT EPITHELIAL;	ACH-000544	oesophageal squamous cell carcinoma	59		Caucasian	0.6199	5%DMSO	1		RPMI-1640+10% FBS	Carcinoma	squamous_cell_carcinoma
Cancer Cell Line Encyclopedia (Broad, 2019)	2B28	OPM2_HAEMATOPOIETIC_AND_LYMPHOID_TISSUE	Mature B-Cell Neoplasms	Plasma Cell Myeloma	X335_splice	OncoKB: NA;CIViC: NA;MyCancerGenome: not present;CancerHotspot: no;3DHotspot: no	SIFT: NA;Polyphen-2: NA	Splice_Site	SNP	Diploid		NA	NA	NA	4	70155382	70155382	G	T	4:g.70155382G>T	ENST00000335568.5:c.1003-1G>T							448						56	CCLE	DSMZ	suspension	ACH-000024	multiple_myeloma	93		Asian	0.5481	5%DMSO	1		RPMI + 10 % FBS	Lymphoid_Neoplasm	plasma_cell_myeloma
Cancer Cell Line Encyclopedia (Broad, 2019)	2B28	OUMS23_LARGE_INTESTINE	Colorectal Cancer	Colorectal Adenocarcinoma	W485L	OncoKB: NA;CIViC: NA;MyCancerGenome: not present;CancerHotspot: no;3DHotspot: no	SIFT: impact: deleterious, score: 0.01;Polyphen-2: impact: probably_damaging, score: 0.944	Missense_Mutation	SNP	Diploid		NA	NA	NA	4	70160391	70160391	G	T	4:g.70160391G>T	ENST00000335568.5:c.1454G>T							340	44718						CCLE	HSSRB	epithelial-like	ACH-000296				Asian	0.5013		1		Dulbecco's modified Eagle's medium with 10% fetal bovine serum	Carcinoma	adenocarcinoma
Cancer Cell Line Encyclopedia (Broad, 2019)	1A4	OVCA420_OVARY	Cancer of Unknown Primary	Cancer of Unknown Primary	S39N	OncoKB: NA;CIViC: NA;MyCancerGenome: not present;CancerHotspot: no;3DHotspot: no	SIFT: NA;Polyphen-2: NA	Missense_Mutation	SNP			NA	NA	NA	2	234627582	234627582	G	A	2:g.234627582G>A	ENST00000373409.3:c.116G>A							262	44682									ACH-002181
Cancer Cell Line Encyclopedia (Broad, 2019)	2B11	OVISE_OVARY	Ovarian Cancer	Ovarian Carcinosarcoma/Malignant Mixed Mesodermal Tumor	F74L	OncoKB: NA;CIViC: NA;MyCancerGenome: not present;CancerHotspot: no;3DHotspot: no	SIFT: impact: tolerated, score: 0.14;Polyphen-2: impact: benign, score: 0.003	Missense_Mutation	SNP	Diploid		NA	NA	NA	4	70080221	70080221	A	G	4:g.70080221A>G	ENST00000446444.1:c.220T>C							334	44713					40	CCLE	HSSRB		ACH-000527	Ovarian Cancer	58.5		Asian	0.5084	5%DMSO	1	japan	RPMI-1640 + 10% FBS	Carcinoma	clear_cell_carcinoma
Cancer Cell Line Encyclopedia (Broad, 2019)	1A9	OVK18_OVARY	Ovarian Cancer	Ovarian Carcinosarcoma/Malignant Mixed Mesodermal Tumor	S8I	OncoKB: NA;CIViC: NA;MyCancerGenome: not present;CancerHotspot: no;3DHotspot: no	SIFT: NA;Polyphen-2: NA	Missense_Mutation	SNP	DeepDel		NA	NA	NA	2	234580603	234580603	G	T	2:g.234580603G>T	ENST00000354728.4:c.23G>T							1840	44682						CCLE	Riken	Adherent	ACH-000947		49.7		Asian	0.1109	5% DMSO	0		MEM+10% FBS	Carcinoma	endometrioid_carcinoma
Cancer Cell Line Encyclopedia (Broad, 2019)	2A3	OVMANA_OVARY	Ovarian Cancer	Ovarian Carcinosarcoma/Malignant Mixed Mesodermal Tumor	E85K	OncoKB: NA;CIViC: NA;MyCancerGenome: not present;CancerHotspot: no;3DHotspot: no	SIFT: impact: tolerated, score: 0.4;Polyphen-2: impact: benign, score: 0.003	Missense_Mutation	SNP	Diploid	1	NA	NA	NA	4	69817226	69817226	C	T	4:g.69817226C>T	ENST00000251566.4:c.253G>A							358	44713					51	CCLE	NIBRI		ACH-000646				Asian	0.6792		1	japan		Carcinoma	clear_cell_carcinoma
Cancer Cell Line Encyclopedia (Broad, 2019)	1A E2-5	PACADD137_PANCREAS	Mixed Cancer Types	Mixed Cancer Types	C508Y	OncoKB: NA;CIViC: NA;MyCancerGenome: not present;CancerHotspot: no;3DHotspot: no	SIFT: impact: deleterious, score: 0.01;Polyphen-2: impact: probably_damaging, score: 0.964	Missense_Mutation	SNP			NA	NA	NA	2	234681129	234681129	G	A	2:g.234681129G>A	ENST00000305139.6:c.1523G>A							1413	44686
Cancer Cell Line Encyclopedia (Broad, 2019)	2A3	PACADD165_PANCREAS	Mixed Cancer Types	Mixed Cancer Types	P69S	OncoKB: NA;CIViC: NA;MyCancerGenome: not present;CancerHotspot: no;3DHotspot: no	SIFT: impact: tolerated, score: 0.67;Polyphen-2: impact: benign, score: 0.007	Missense_Mutation	SNP			NA	NA	NA	4	69817274	69817274	G	A	4:g.69817274G>A	ENST00000251566.4:c.205C>T							142	44713
Cancer Cell Line Encyclopedia (Broad, 2019)	1A10	PATU8988S_PANCREAS	Pancreatic Cancer	Pancreatic Adenocarcinoma	W251R	OncoKB: NA;CIViC: NA;MyCancerGenome: not present;CancerHotspot: no;3DHotspot: no	SIFT: impact: deleterious, score: 0;Polyphen-2: impact: probably_damaging, score: 1	Missense_Mutation	SNP	Diploid		NA	NA	NA	2	234545919	234545919	T	C	2:g.234545919T>C	ENST00000344644.5:c.751T>C							106	44682	3.1839e-05		rs1292087477		64	CCLE	DSMZ	Adherent epitheloid cells in monolayer	ACH-000022		110		Caucasian	0.5531	10%DMSO	1		DMEM + 10%FBS	Carcinoma	ductal_carcinoma
Cancer Cell Line Encyclopedia (Broad, 2019)	1A10	PATU8988T_PANCREAS	Pancreatic Cancer	Pancreatic Adenocarcinoma	W251R	OncoKB: NA;CIViC: NA;MyCancerGenome: not present;CancerHotspot: no;3DHotspot: no	SIFT: impact: deleterious, score: 0;Polyphen-2: impact: probably_damaging, score: 1	Missense_Mutation	SNP	Diploid		NA	NA	NA	2	234545919	234545919	T	C	2:g.234545919T>C	ENST00000344644.5:c.751T>C							211	44682	3.1839e-05		rs1292087477		64	CCLE	GNF		ACH-000023				Caucasian	0.4932		1			Carcinoma	ductal_carcinoma
Cancer Cell Line Encyclopedia (Broad, 2019)	1A5	PC14_LUNG	Non-Small Cell Lung Cancer	Non-Small Cell Lung Cancer	L132M	OncoKB: NA;CIViC: NA;MyCancerGenome: not present;CancerHotspot: no;3DHotspot: no	SIFT: NA;Polyphen-2: NA	Missense_Mutation	SNP	Amp		NA	NA	NA	2	234622031	234622031	C	A	2:g.234622031C>A	ENST00000373414.3:c.394C>A							358	44682						CCLE	RIKEN	adherent	ACH-000030	lung_cancer	35.2966		Asian	0.5574	5%DMSO	1		RPMI+10%FBS	Carcinoma	non_small_cell_carcinoma
Cancer Cell Line Encyclopedia (Broad, 2019)	1A5	PC9_LUNG	Cancer of Unknown Primary	Cancer of Unknown Primary	L132M	OncoKB: NA;CIViC: NA;MyCancerGenome: not present;CancerHotspot: no;3DHotspot: no	SIFT: NA;Polyphen-2: NA	Missense_Mutation	SNP			NA	NA	NA	2	234622031	234622031	C	A	2:g.234622031C>A	ENST00000373414.3:c.394C>A							722	44682									ACH-000779
Cancer Cell Line Encyclopedia (Broad, 2019)	2B28	PECAPJ49_UPPER_AERODIGESTIVE_TRACT	Esophagogastric Cancer	Esophageal Poorly Differentiated Carcinoma	M214K	OncoKB: NA;CIViC: NA;MyCancerGenome: not present;CancerHotspot: no;3DHotspot: no	SIFT: impact: deleterious, score: 0;Polyphen-2: impact: possibly_damaging, score: 0.47	Missense_Mutation	SNP	Diploid		NA	NA	NA	4	70146859	70146859	T	A	4:g.70146859T>A	ENST00000335568.5:c.641T>A							272	44713					57	CCLE	ECACC	adherent	ACH-000735		54.5		Caucasian	0.2647	5% DMSO	0		IMDM+10% FBS	Carcinoma	squamous_cell_carcinoma
Cancer Cell Line Encyclopedia (Broad, 2019)	1A3	PEDS005TPFAD_KIDNEY	Mixed Cancer Types	Mixed Cancer Types	T76I	OncoKB: NA;CIViC: NA;MyCancerGenome: not present;CancerHotspot: no;3DHotspot: no	SIFT: NA;Polyphen-2: NA	Missense_Mutation	SNP			NA	NA	NA	2	234637999	234637999	C	T	2:g.234637999C>T	ENST00000482026.1:c.227C>T							180	44682
Cancer Cell Line Encyclopedia (Broad, 2019)	2B15	PEER_HAEMATOPOIETIC_AND_LYMPHOID_TISSUE	T-Lymphoblastic Leukemia/Lymphoma	T-Lymphoblastic Leukemia/Lymphoma	D122E	OncoKB: NA;CIViC: NA;MyCancerGenome: not present;CancerHotspot: no;3DHotspot: no	SIFT: impact: tolerated, score: 0.26;Polyphen-2: impact: benign, score: 0.007	Missense_Mutation	SNP	Diploid		NA	NA	NA	4	69535971	69535971	G	C	4:g.69535971G>C	ENST00000338206.5:c.366C>G							240	44713					4	CCLE	HSRRB	lymphocyte-like	ACH-000519	T-ALL			Caucasian	0.2236		0		RPMI 1640 medium with fetal calf serum	Lymphoid_Neoplasm	acute_lymphoblastic_T_cell_leukaemia
Cancer Cell Line Encyclopedia (Broad, 2019)	2B7	PF382_HAEMATOPOIETIC_AND_LYMPHOID_TISSUE	T-Lymphoblastic Leukemia/Lymphoma	T-Lymphoblastic Leukemia/Lymphoma	X290_splice	OncoKB: NA;CIViC: NA;MyCancerGenome: not present;CancerHotspot: no;3DHotspot: no	SIFT: NA;Polyphen-2: NA	Splice_Site	SNP	Diploid		NA	NA	NA	4	69964408	69964408	T	C	4:g.69964408T>C	ENST00000305231.7:c.870+2T>C							3631						6	CCLE	DSMZ	single, round to oval cells in suspention	ACH-000937	TALL		~ 70 hrs	Caucasian	0.0493		0		90% RPMI 1640 +10% h.i. FBS	Lymphoid_Neoplasm	acute_lymphoblastic_T_cell_leukaemia
Cancer Cell Line Encyclopedia (Broad, 2019)	3A1	PK1_PANCREAS	Pancreatic Cancer	Pancreatic Adenocarcinoma	L26P	OncoKB: NA;CIViC: NA;MyCancerGenome: not present;CancerHotspot: no;3DHotspot: no	SIFT: impact: deleterious, score: 0;Polyphen-2: impact: probably_damaging, score: 0.995	Missense_Mutation	SNP	Diploid		NA	NA	NA	5	35991266	35991266	A	G	5:g.35991266A>G	ENST00000274278.3:c.77T>C							233	44743						CCLE	RIKEN	Adherent	ACH-000307		58.2		Asian	0.6511	5% DMSO	0		RPMI 1640 +10%FBS	Carcinoma	NS
Cancer Cell Line Encyclopedia (Broad, 2019)	1A4	PK45H_PANCREAS	Pancreatic Cancer	Pancreatic Adenocarcinoma	S43Afs*23	OncoKB: NA;CIViC: NA;MyCancerGenome: not present;CancerHotspot: no;3DHotspot: no	SIFT: NA;Polyphen-2: NA	Frame_Shift_Del	DEL	Diploid		NA	NA	NA	2	234627593	234627593	A	-	2:g.234627593del	ENST00000373409.3:c.127del							381	44682						CCLE	RIKEN	Adherent	ACH-000468		67.4		Asian	0.4579	5%DMSO	1		RPMI + 10 % FBS	Carcinoma	NS
Cancer Cell Line Encyclopedia (Broad, 2019)	3A2	R262_CENTRAL_NERVOUS_SYSTEM	Mixed Cancer Types	Mixed Cancer Types	G467Rfs*15	OncoKB: NA;CIViC: NA;MyCancerGenome: not present;CancerHotspot: no;3DHotspot: no	SIFT: NA;Polyphen-2: NA	Frame_Shift_Del	DEL		1	NA	NA	NA	5	36035976	36035977	CT	-	5:g.36035976_36035977del	ENST00000282507.3:c.1395_1396del							292	44749	7.95938e-06		rs778271529
Cancer Cell Line Encyclopedia (Broad, 2019)	1A8	RCC10RGB_KIDNEY	Kidney Cancer	Renal Cell Carcinoma	A173S	OncoKB: NA;CIViC: NA;MyCancerGenome: not present;CancerHotspot: no;3DHotspot: no	SIFT: impact: deleterious, score: 0.02;Polyphen-2: impact: benign, score: 0.116	Missense_Mutation	SNP	Diploid		NA	NA	NA	2	234526870	234526870	G	T	2:g.234526870G>T	ENST00000373450.4:c.517G>T							260	44682						CCLE	RIKEN	ADHERENT; EPITHELIAL-LIKE	ACH-000189		122.9		Asian	0.7003	5%DMSO	1		DMEM+10% FBS	Carcinoma	renal_cell_carcinoma
Cancer Cell Line Encyclopedia (Broad, 2019)	2B4	RCCER_KIDNEY	Cancer of Unknown Primary	Cancer of Unknown Primary	A428V	OncoKB: NA;CIViC: NA;MyCancerGenome: not present;CancerHotspot: no;3DHotspot: no	SIFT: impact: deleterious, score: 0;Polyphen-2: impact: probably_damaging, score: 0.963	Missense_Mutation	SNP			NA	NA	NA	4	70350953	70350953	G	A	4:g.70350953G>A	ENST00000305107.6:c.1283C>T							163	44717									ACH-002188
Cancer Cell Line Encyclopedia (Broad, 2019)	1A1	RCCJW_KIDNEY	Cancer of Unknown Primary	Cancer of Unknown Primary	E56A	OncoKB: NA;CIViC: NA;MyCancerGenome: not present;CancerHotspot: no;3DHotspot: no	SIFT: NA;Polyphen-2: NA	Missense_Mutation	SNP			NA	NA	NA	2	234669100	234669100	A	C	2:g.234669100A>C	ENST00000305208.5:c.167A>C							161	44682	4.59689e-05	Uncertain_significance	rs140365717						ACH-002191
Cancer Cell Line Encyclopedia (Broad, 2019)	1A6	RCHACV_HAEMATOPOIETIC_AND_LYMPHOID_TISSUE	Leukemia	Acute Undifferentiated Leukemia	P266L	OncoKB: NA;CIViC: NA;MyCancerGenome: not present;CancerHotspot: no;3DHotspot: no	SIFT: impact: deleterious, score: 0;Polyphen-2: impact: probably_damaging, score: 1	Missense_Mutation	SNP	Diploid		NA	NA	NA	2	234602447	234602447	C	T	2:g.234602447C>T	ENST00000305139.6:c.797C>T							1157	44682					8	CCLE	DSMZ	small round cells growing singly or in small clumps in suspention; accasional adherent cells present	ACH-000922	acute lymphoblastic leukemia	39.3	~ 30-50 hrs	Caucasian	0.1143		0		80-90% RPMI 1640 +10-20% h.i. FBS	Lymphoid_Neoplasm	acute_lymphoblastic_B_cell_leukaemia
Cancer Cell Line Encyclopedia (Broad, 2019)	2B11	RCM1_LARGE_INTESTINE	Colorectal Cancer	Colorectal Adenocarcinoma	K355E	OncoKB: NA;CIViC: NA;MyCancerGenome: not present;CancerHotspot: no;3DHotspot: no	SIFT: impact: tolerated, score: 0.27;Polyphen-2: impact: benign, score: 0.123	Missense_Mutation	SNP	Diploid	1	NA	NA	NA	4	70071225	70071225	T	C	4:g.70071225T>C	ENST00000446444.1:c.1063A>G							381	44716					73	CCLE	HSSRB	ADHERENT	ACH-000565	rectum; adenocarcinoma; well differentiated	68.5	70hrs	Asian	0.4152	5% DMSO	1		RPMI:F12 1:1+10% FBS	Carcinoma	adenocarcinoma
Cancer Cell Line Encyclopedia (Broad, 2019)	2B10	REH_HAEMATOPOIETIC_AND_LYMPHOID_TISSUE	B-Lymphoblastic Leukemia/Lymphoma	B-Lymphoblastic Leukemia/Lymphoma	H488N	OncoKB: NA;CIViC: NA;MyCancerGenome: not present;CancerHotspot: no;3DHotspot: no	SIFT: impact: deleterious, score: 0;Polyphen-2: impact: probably_damaging, score: 0.993	Missense_Mutation	SNP			NA	NA	NA	4	69696472	69696472	C	A	4:g.69696472C>A	ENST00000265403.7:c.1462C>A							2005	44718					15	CCLE	ATCC	Lymphoblast suspension	ACH-000960		62.7		Caucasian	0.0412	5%DMSO	0		RPMI 1640+10%FBS	Lymphoid_Neoplasm	acute_lymphoblastic_B_cell_leukaemia
Cancer Cell Line Encyclopedia (Broad, 2019)	2B15	RF48_STOMACH	Cancer of Unknown Primary	Cancer of Unknown Primary	R478Q	OncoKB: NA;CIViC: NA;MyCancerGenome: not present;CancerHotspot: no;3DHotspot: no	SIFT: impact: deleterious, score: 0;Polyphen-2: impact: probably_damaging, score: 1	Missense_Mutation	SNP			NA	NA	NA	4	69512982	69512982	C	T	4:g.69512982C>T	ENST00000338206.5:c.1433G>A							203	44718	1.76785e-05		rs552656891						ACH-002301
Cancer Cell Line Encyclopedia (Broad, 2019)	1A1	RH1_SOFT_TISSUE	Cancer of Unknown Primary	Cancer of Unknown Primary	D103Y	OncoKB: NA;CIViC: NA;MyCancerGenome: not present;CancerHotspot: no;3DHotspot: no	SIFT: NA;Polyphen-2: NA	Missense_Mutation	SNP		1	NA	NA	NA	2	234669240	234669240	G	T	2:g.234669240G>T	ENST00000305208.5:c.307G>T							220	44682									ACH-002194
Cancer Cell Line Encyclopedia (Broad, 2019)	2B15	RH28_SOFT_TISSUE	Mixed Cancer Types	Mixed Cancer Types	Q360K	OncoKB: NA;CIViC: NA;MyCancerGenome: not present;CancerHotspot: no;3DHotspot: no	SIFT: impact: deleterious, score: 0;Polyphen-2: impact: probably_damaging, score: 0.983	Missense_Mutation	SNP			NA	NA	NA	4	69520828	69520828	G	T	4:g.69520828G>T	ENST00000338206.5:c.1078C>A							301	44716
Cancer Cell Line Encyclopedia (Broad, 2019)	1A7	RH30_SOFT_TISSUE	Soft Tissue Sarcoma	Embryonal Rhabdomyosarcoma	Y222C	OncoKB: NA;CIViC: NA;MyCancerGenome: not present;CancerHotspot: no;3DHotspot: no	SIFT: NA;Polyphen-2: NA	Missense_Mutation	SNP	Diploid		NA	NA	NA	2	234591248	234591248	A	G	2:g.234591248A>G	ENST00000373426.3:c.665A>G							442	44682					17	CCLE	DSMZ	adherent epithelial-like cells growing as monolayer	ACH-000833			~ 35 hrs	Caucasian	0.4922		2		90-95% RPMI 1640 +5-10 h.i. FBS	Rhabdomyosarcoma	alveolar
Cancer Cell Line Encyclopedia (Broad, 2019)	1A6	RHJT_SOFT_TISSUE	Mixed Cancer Types	Mixed Cancer Types	S206Pfs*38	OncoKB: NA;CIViC: NA;MyCancerGenome: not present;CancerHotspot: no;3DHotspot: no	SIFT: NA;Polyphen-2: NA	Frame_Shift_Del	DEL			NA	NA	NA	2	234602262	234602262	T	-	2:g.234602262del	ENST00000305139.6:c.616del							138	44682
Cancer Cell Line Encyclopedia (Broad, 2019)	2B11	RKO_LARGE_INTESTINE	Colorectal Cancer	Colorectal Adenocarcinoma	Y170H	OncoKB: NA;CIViC: NA;MyCancerGenome: not present;CancerHotspot: no;3DHotspot: no	SIFT: impact: deleterious, score: 0.02;Polyphen-2: impact: possibly_damaging, score: 0.678	Missense_Mutation	SNP	Diploid		NA	NA	NA	4	70079933	70079933	A	G	4:g.70079933A>G	ENST00000446444.1:c.508T>C							3424	44713						CCLE	ATCC	adherent epithelial	ACH-000943		25.6		African_american	0.1421	5% DMSO	0		EMEM+ 10% FBS	Carcinoma	adenocarcinoma
Cancer Cell Line Encyclopedia (Broad, 2019)	2B10	RL_HAEMATOPOIETIC_AND_LYMPHOID_TISSUE	B-Lymphoblastic Leukemia/Lymphoma	B-Lymphoblastic Leukemia/Lymphoma	D120E	OncoKB: NA;CIViC: NA;MyCancerGenome: not present;CancerHotspot: no;3DHotspot: no	SIFT: impact: tolerated, score: 0.25;Polyphen-2: impact: benign, score: 0.005	Missense_Mutation	SNP			NA	NA	NA	4	69682097	69682097	C	G	4:g.69682097C>G	ENST00000265403.7:c.360C>G							345	44713					52	CCLE		suspension	ACH-000371	non-Hodgkins lymphoma	62.5		Caucasian	0.1923	5% DMSO	0		RPMI1640+20%FBS	Lymphoid_Neoplasm	B_cell_lymphoma_unspecified
Cancer Cell Line Encyclopedia (Broad, 2019)	UGT8	RL952_ENDOMETRIUM	Endometrial Cancer	Endometrial Carcinoma	K351N	OncoKB: NA;CIViC: NA;MyCancerGenome: not present;CancerHotspot: no;3DHotspot: no	SIFT: impact: tolerated, score: 0.86;Polyphen-2: impact: benign, score: 0.015	Missense_Mutation	SNP	Diploid		NA	NA	NA	4	115589251	115589251	G	T	4:g.115589251G>T	ENST00000310836.6:c.1053G>T							2470	44717					65	CCLE	NIBRI		ACH-000965				Caucasian	0.1162		0			Carcinoma	mixed_adenosquamous_carcinoma
Cancer Cell Line Encyclopedia (Broad, 2019)	1A7	RPMI8402_HAEMATOPOIETIC_AND_LYMPHOID_TISSUE	T-Lymphoblastic Leukemia/Lymphoma	T-Lymphoblastic Leukemia/Lymphoma	S113Y	OncoKB: NA;CIViC: NA;MyCancerGenome: not present;CancerHotspot: no;3DHotspot: no	SIFT: NA;Polyphen-2: NA	Missense_Mutation	SNP	Diploid		NA	NA	NA	2	234590921	234590921	C	A	2:g.234590921C>A	ENST00000373426.3:c.338C>A							516	44682					16	CCLE	DSMZ	SUSPENSION	ACH-000636	TALL	51.7		Caucasian	0.3039	5% DMSO	0		RPMI-1640+ 10% FBS	Lymphoid_Neoplasm	acute_lymphoblastic_T_cell_leukaemia
Cancer Cell Line Encyclopedia (Broad, 2019)	2B10	RS5_FIBROBLAST	Mesothelioma	Pleural Mesothelioma, Epithelioid Type	R458L	OncoKB: NA;CIViC: NA;MyCancerGenome: not present;CancerHotspot: no;3DHotspot: no	SIFT: impact: deleterious, score: 0.01;Polyphen-2: impact: possibly_damaging, score: 0.478	Missense_Mutation	SNP			NA	NA	NA	4	69696383	69696383	G	T	4:g.69696383G>T	ENST00000265403.7:c.1373G>T							182	44718					78	CCLE	DSMZ	adherent, sarcomatoid-like cells growing in monolayers	ACH-000531			4 days	Caucasian		5% DMSO			90% NCTC-109 + 10% h.i. FBS	Mesothelioma	NS
Cancer Cell Line Encyclopedia (Broad, 2019)	2B4	RT112_URINARY_TRACT	Bladder Cancer	Bladder Urothelial Carcinoma	E248D	OncoKB: NA;CIViC: NA;MyCancerGenome: not present;CancerHotspot: no;3DHotspot: no	SIFT: impact: deleterious, score: 0.05;Polyphen-2: impact: benign, score: 0.107	Missense_Mutation	SNP	Diploid		NA	NA	NA	4	70359537	70359537	C	G	4:g.70359537C>G	ENST00000305107.6:c.744G>C							241	44714						CCLE	DSMZ	Adherent	ACH-000473		36.1		Caucasian	0.2707	5%DMSO	0		RPMI +10%FBS	Carcinoma	transitional_cell_carcinoma
Cancer Cell Line Encyclopedia (Broad, 2019)	1A10	RVH421_SKIN	Melanoma	Cutaneous Melanoma	M91I	OncoKB: NA;CIViC: NA;MyCancerGenome: not present;CancerHotspot: no;3DHotspot: no	SIFT: impact: tolerated, score: 0.38;Polyphen-2: impact: benign, score: 0.01	Missense_Mutation	SNP	Diploid		NA	NA	NA	2	234545441	234545441	G	A	2:g.234545441G>A	ENST00000344644.5:c.273G>A							364	44682					28	CCLE		Adherent	ACH-000614		49.5		Caucasian	0.418	5%DMSO	1	europe	RPMI1640+10%FBS	Malignant_Melanoma	NS
Cancer Cell Line Encyclopedia (Broad, 2019)	3A2	SARC9371_BONE	Cancer of Unknown Primary	Cancer of Unknown Primary	S73L	OncoKB: NA;CIViC: NA;MyCancerGenome: not present;CancerHotspot: no;3DHotspot: no	SIFT: impact: deleterious, score: 0.02;Polyphen-2: impact: benign, score: 0.311	Missense_Mutation	SNP		1	NA	NA	NA	5	36052065	36052065	G	A	5:g.36052065G>A	ENST00000282507.3:c.218C>T							2482	44745									ACH-002396
Cancer Cell Line Encyclopedia (Broad, 2019)	2B11	SAT_UPPER_AERODIGESTIVE_TRACT	Cancer of Unknown Primary	Cancer of Unknown Primary	K355E	OncoKB: NA;CIViC: NA;MyCancerGenome: not present;CancerHotspot: no;3DHotspot: no	SIFT: impact: tolerated, score: 0.27;Polyphen-2: impact: benign, score: 0.123	Missense_Mutation	SNP		1	NA	NA	NA	4	70071225	70071225	T	C	4:g.70071225T>C	ENST00000446444.1:c.1063A>G							221	44716									ACH-001641
Cancer Cell Line Encyclopedia (Broad, 2019)	2B7	SCABER_URINARY_TRACT	Bladder Cancer	Bladder Urothelial Carcinoma	I403T	OncoKB: NA;CIViC: NA;MyCancerGenome: not present;CancerHotspot: no;3DHotspot: no	SIFT: impact: tolerated, score: 0.06;Polyphen-2: impact: possibly_damaging, score: 0.87	Missense_Mutation	SNP	Diploid		NA	NA	NA	4	69973938	69973938	T	C	4:g.69973938T>C	ENST00000305231.7:c.1208T>C							394	44717			rs1719669231		58	CCLE	ATCC	Adherent epithelial	ACH-000839		52.6		African_american	0.5781	5%DMSO	1		EMEM +10%FBS	Carcinoma	transitional_cell_carcinoma
Cancer Cell Line Encyclopedia (Broad, 2019)	2B11	SCMCRM2_SOFT_TISSUE	Mixed Cancer Types	Mixed Cancer Types	A346G	OncoKB: NA;CIViC: NA;MyCancerGenome: not present;CancerHotspot: no;3DHotspot: no	SIFT: impact: deleterious, score: 0;Polyphen-2: impact: benign, score: 0.102	Missense_Mutation	SNP			NA	NA	NA	4	70071251	70071251	G	C	4:g.70071251G>C	ENST00000446444.1:c.1037C>G							444	44716
Cancer Cell Line Encyclopedia (Broad, 2019)	3A2	SEKI_SKIN	Mixed Cancer Types	Mixed Cancer Types	R188Lfs*5	OncoKB: NA;CIViC: NA;MyCancerGenome: not present;CancerHotspot: no;3DHotspot: no	SIFT: NA;Polyphen-2: NA	Frame_Shift_Del	DEL			NA	NA	NA	5	36049270	36049271	AC	-	5:g.36049270_36049271del	ENST00000282507.3:c.563_564del							812	44746			rs1742260346
Cancer Cell Line Encyclopedia (Broad, 2019)	2B10	SF268_CENTRAL_NERVOUS_SYSTEM	Glioma	Glioblastoma Multiforme	E293D	OncoKB: NA;CIViC: NA;MyCancerGenome: not present;CancerHotspot: no;3DHotspot: no	SIFT: impact: tolerated, score: 0.36;Polyphen-2: impact: benign, score: 0.026	Missense_Mutation	SNP			NA	NA	NA	4	69688000	69688000	G	T	4:g.69688000G>T	ENST00000265403.7:c.879G>T							275	44715						CCLE	Garraway Lab	Mix	ACH-000655		63		Caucasian	0.708	5% DMSO			RPMI-1640+ 5% FBS	Glioma	NS
Cancer Cell Line Encyclopedia (Broad, 2019)	2B4	SF295_CENTRAL_NERVOUS_SYSTEM	Glioma	Glioblastoma Multiforme	I62V	OncoKB: NA;CIViC: NA;MyCancerGenome: not present;CancerHotspot: no;3DHotspot: no	SIFT: impact: tolerated, score: 0.27;Polyphen-2: impact: benign, score: 0.411	Missense_Mutation	SNP	Diploid		NA	NA	NA	4	70361396	70361396	T	C	4:g.70361396T>C	ENST00000305107.6:c.184A>G							297	44713					67	CCLE	GNF		ACH-000376	brain_cancer			Caucasian	0.324		1			Glioma	astrocytoma_Grade_IV
Cancer Cell Line Encyclopedia (Broad, 2019)	2A3	SIMA_AUTONOMIC_GANGLIA	Neuroblastoma	Peripheral Nervous System	C280S	OncoKB: NA;CIViC: NA;MyCancerGenome: not present;CancerHotspot: no;3DHotspot: no	SIFT: impact: deleterious, score: 0.01;Polyphen-2: impact: probably_damaging, score: 0.942	Missense_Mutation	SNP	Diploid		NA	NA	NA	4	69811049	69811049	C	G	4:g.69811049C>G	ENST00000251566.4:c.839G>C							182	44714					1.6666	CCLE	DSMZ	cell shape is bipolar, cells growing as monolayer or forming foci	ACH-000099			highly variable ~ 34-100 hrs	Caucasian	0.1105		0	europe	90% RPMI 1640 +10% h.i. FBS	Neuroblastoma	NS
Cancer Cell Line Encyclopedia (Broad, 2019)	2B7	SISO_CERVIX	Cancer of Unknown Primary	Cancer of Unknown Primary	I188T	OncoKB: NA;CIViC: NA;MyCancerGenome: not present;CancerHotspot: no;3DHotspot: no	SIFT: impact: tolerated, score: 0.27;Polyphen-2: impact: benign, score: 0.096	Missense_Mutation	SNP			NA	NA	NA	4	69962801	69962801	T	C	4:g.69962801T>C	ENST00000305231.7:c.563T>C							3120	44713									ACH-001650
Cancer Cell Line Encyclopedia (Broad, 2019)	1A7	SJRH30_SOFT_TISSUE	Soft Tissue Sarcoma	Embryonal Rhabdomyosarcoma	Y222C	OncoKB: NA;CIViC: NA;MyCancerGenome: not present;CancerHotspot: no;3DHotspot: no	SIFT: NA;Polyphen-2: NA	Missense_Mutation	SNP	Diploid		NA	NA	NA	2	234591248	234591248	A	G	2:g.234591248A>G	ENST00000373426.3:c.665A>G							294	44682					17	CCLE			ACH-001189				Caucasian	0.5666		2			Rhabdomyosarcoma	NS
Cancer Cell Line Encyclopedia (Broad, 2019)	1A7	SKCO1_LARGE_INTESTINE	Colorectal Cancer	Colorectal Adenocarcinoma	R68K	OncoKB: NA;CIViC: NA;MyCancerGenome: not present;CancerHotspot: no;3DHotspot: no	SIFT: NA;Polyphen-2: NA	Missense_Mutation	SNP	Diploid		NA	NA	NA	2	234590786	234590786	G	A	2:g.234590786G>A	ENST00000373426.3:c.203G>A							294	44682					65	CCLE	ATCC	ADHERENT EPITHELIAL;	ACH-000400		76		Caucasian	0.552	5% DMSO	1		EMEM +10% FBS	Carcinoma	adenocarcinoma
Cancer Cell Line Encyclopedia (Broad, 2019)	2B7	SKGT2_STOMACH	Cancer of Unknown Primary	Cancer of Unknown Primary	V112I	OncoKB: NA;CIViC: NA;MyCancerGenome: not present;CancerHotspot: no;3DHotspot: no	SIFT: impact: tolerated, score: 0.24;Polyphen-2: impact: benign, score: 0.007	Missense_Mutation	SNP			NA	NA	NA	4	69962572	69962572	G	A	4:g.69962572G>A	ENST00000305231.7:c.334G>A							352	44713		drug_response	rs373954369						ACH-001653
Cancer Cell Line Encyclopedia (Broad, 2019)	1A4	SKGT4_OESOPHAGUS	Cancer of Unknown Primary	Cancer of Unknown Primary	K87E	OncoKB: NA;CIViC: NA;MyCancerGenome: not present;CancerHotspot: no;3DHotspot: no	SIFT: NA;Polyphen-2: NA	Missense_Mutation	SNP			NA	NA	NA	2	234627725	234627725	A	G	2:g.234627725A>G	ENST00000373409.3:c.259A>G							201	44682									ACH-001654
Cancer Cell Line Encyclopedia (Broad, 2019)	2B10	SKM1_HAEMATOPOIETIC_AND_LYMPHOID_TISSUE	Leukemia	Acute Myeloid Leukemia	Y152C	OncoKB: NA;CIViC: NA;MyCancerGenome: not present;CancerHotspot: no;3DHotspot: no	SIFT: impact: deleterious, score: 0;Polyphen-2: impact: benign, score: 0.219	Missense_Mutation	SNP			NA	NA	NA	4	69682192	69682192	A	G	4:g.69682192A>G	ENST00000265403.7:c.455A>G							279	44713					76	CCLE	HSRRB	suspension	ACH-000373		40		Asian	0.3044	5% DMSO	0	japan	RPMI 1640+20%FBS	Haematopoietic_Neoplasm	acute_myeloid_leukaemia
Cancer Cell Line Encyclopedia (Broad, 2019)	3A2	SKMEL1_SKIN	Melanoma	Cutaneous Melanoma	D132N	OncoKB: NA;CIViC: NA;MyCancerGenome: not present;CancerHotspot: no;3DHotspot: no	SIFT: impact: tolerated, score: 0.34;Polyphen-2: impact: benign, score: 0.062	Missense_Mutation	SNP	Amp		NA	NA	NA	5	36049440	36049440	C	T	5:g.36049440C>T	ENST00000282507.3:c.394G>A							280	44746					29	CCLE	NIBRI		ACH-000465				Caucasian	0.5124		1			Malignant_Melanoma	NS
Cancer Cell Line Encyclopedia (Broad, 2019)	1A3	SKMEL2_SKIN	Melanoma	Cutaneous Melanoma	E130K	OncoKB: NA;CIViC: NA;MyCancerGenome: not present;CancerHotspot: no;3DHotspot: no	SIFT: NA;Polyphen-2: NA	Missense_Mutation	SNP	Diploid		NA	NA	NA	2	234638160	234638160	G	A	2:g.234638160G>A	ENST00000482026.1:c.388G>A							900	44682					60	CCLE		polyglonal adherent	ACH-001190	skin_cancer	98.8		Caucasian	0.3662	5%DMSO	0			Malignant_Melanoma	NS
Cancer Cell Line Encyclopedia (Broad, 2019)	1A10	SKMEL3_SKIN	Melanoma	Cutaneous Melanoma	R3H	OncoKB: NA;CIViC: NA;MyCancerGenome: not present;CancerHotspot: no;3DHotspot: no	SIFT: impact: tolerated_low_confidence, score: 0.19;Polyphen-2: impact: benign, score: 0	Missense_Mutation	SNP	Diploid		NA	NA	NA	2	234545176	234545176	G	A	2:g.234545176G>A	ENST00000344644.5:c.8G>A							291	44682	1.78457e-05		rs754658257		42	CCLE		Fibroblast like adherent	ACH-000423		387		Caucasian	0.5135	5%DMSO	2		McCoy 5A+15%FBS	Malignant_Melanoma	NS
Cancer Cell Line Encyclopedia (Broad, 2019)	1A E2-5	SKMEL30_SKIN	Melanoma	Cutaneous Melanoma	K427N	OncoKB: NA;CIViC: NA;MyCancerGenome: not present;CancerHotspot: no;3DHotspot: no	SIFT: impact: tolerated, score: 0.42;Polyphen-2: impact: benign, score: 0.166	Missense_Mutation	SNP	Diploid		NA	NA	NA	2	234677065	234677065	A	C	2:g.234677065A>C	ENST00000305139.6:c.1281A>C							536	44685					67	CCLE	DSMZ	Adherent	ACH-000810		41.6		Caucasian	0.414	10%DMSO	1		RPMI-1640 + 10% FBS	Malignant_Melanoma	NS
Cancer Cell Line Encyclopedia (Broad, 2019)	2B4	SKMES1_LUNG	Non-Small Cell Lung Cancer	Non-Small Cell Lung Cancer	S184G	OncoKB: NA;CIViC: NA;MyCancerGenome: not present;CancerHotspot: no;3DHotspot: no	SIFT: impact: tolerated, score: 0.14;Polyphen-2: impact: benign, score: 0	Missense_Mutation	SNP	Diploid		NA	NA	NA	4	70361030	70361030	T	C	4:g.70361030T>C	ENST00000305107.6:c.550A>G							541	44713					65	CCLE			ACH-000665	lung_cancer			Caucasian	0.763		1			Carcinoma	squamous_cell_carcinoma
Cancer Cell Line Encyclopedia (Broad, 2019)	2B28	SKNDZ_AUTONOMIC_GANGLIA	Neuroblastoma	Peripheral Nervous System	H386Q	OncoKB: NA;CIViC: NA;MyCancerGenome: not present;CancerHotspot: no;3DHotspot: no	SIFT: impact: deleterious, score: 0;Polyphen-2: impact: probably_damaging, score: 0.96	Missense_Mutation	SNP	Diploid	2	NA	NA	NA	4	70156377	70156377	T	A	4:g.70156377T>A	ENST00000335568.5:c.1158T>A							283	44717					2	CCLE	NIBRI		ACH-000366	neuroblastoma			Caucasian	0.3129		0			Neuroblastoma	NS
Cancer Cell Line Encyclopedia (Broad, 2019)	3A2	SKUT1_SOFT_TISSUE	Soft Tissue Sarcoma	Embryonal Rhabdomyosarcoma	P161S	OncoKB: NA;CIViC: NA;MyCancerGenome: not present;CancerHotspot: no;3DHotspot: no	SIFT: impact: deleterious, score: 0.03;Polyphen-2: impact: benign, score: 0.36	Missense_Mutation	SNP	Diploid		NA	NA	NA	5	36049353	36049353	G	A	5:g.36049353G>A	ENST00000282507.3:c.481C>T							1903	44746			rs200161378		75	CCLE	ATCC	adherent epithelial	ACH-000939		41.6		Caucasian	0.0647	5%DMSO	0		EMEM + 10% FBS	Leiomyosarcoma	NS
Cancer Cell Line Encyclopedia (Broad, 2019)	UGT8	SLR25_KIDNEY	Kidney Cancer	Renal Cell Carcinoma	Y110Ifs*7	OncoKB: NA;CIViC: NA;MyCancerGenome: not present;CancerHotspot: no;3DHotspot: no	SIFT: NA;Polyphen-2: NA	Frame_Shift_Del	DEL	Diploid		NA	NA	NA	4	115544364	115544364	T	-	4:g.115544364del	ENST00000310836.6:c.328del							150	44714						collaborator			ACH-000300				Caucasian	0.6932		1			Carcinoma	renal_cell_carcinoma
Cancer Cell Line Encyclopedia (Broad, 2019)	2B7	SNB75_CENTRAL_NERVOUS_SYSTEM	Glioma	Glioblastoma Multiforme	V467A	OncoKB: NA;CIViC: NA;MyCancerGenome: not present;CancerHotspot: no;3DHotspot: no	SIFT: impact: deleterious, score: 0.02;Polyphen-2: impact: possibly_damaging, score: 0.874	Missense_Mutation	SNP	Diploid		NA	NA	NA	4	69978264	69978264	T	C	4:g.69978264T>C	ENST00000305231.7:c.1400T>C							251	44718						CCLE	Garraway Lab	Adherent	ACH-000504		54		Caucasian	0.4875	5% DMSO			RPMI-1640+ 5% FBS	Glioma	NS
Cancer Cell Line Encyclopedia (Broad, 2019)	1A8	SNGM_ENDOMETRIUM	Endometrial Cancer	Endometrial Carcinoma	N226Mfs*3	OncoKB: NA;CIViC: NA;MyCancerGenome: not present;CancerHotspot: no;3DHotspot: no	SIFT: NA;Polyphen-2: NA	Frame_Shift_Del	DEL	Diploid		NA	NA	NA	2	234527026	234527026	A	-	2:g.234527026del	ENST00000373450.4:c.677del							3147	44682					52	CCLE	HSSRB	epithelial-like	ACH-000974	intermediately differentiated adenocarcinoma			Asian	0.0803		0	japan	Ham's F12 medium with 20% fetal bovine serum	Carcinoma	adenocarcinoma
Cancer Cell Line Encyclopedia (Broad, 2019)	1A7	SNU1_STOMACH	Esophagogastric Cancer	Esophageal Squamous Cell Carcinoma	L193I	OncoKB: NA;CIViC: NA;MyCancerGenome: not present;CancerHotspot: no;3DHotspot: no	SIFT: NA;Polyphen-2: NA	Missense_Mutation	SNP	Diploid		NA	NA	NA	2	234591160	234591160	C	A	2:g.234591160C>A	ENST00000373426.3:c.577C>A							1849	44682					44	CCLE	NIBRI		ACH-000932	poorly_differentiated_gastric carcinoma			Asian	0.0541		0			Carcinoma	undifferentiated_adenocarcinoma
Cancer Cell Line Encyclopedia (Broad, 2019)	1A E2-5	SNU1040_LARGE_INTESTINE	Colorectal Cancer	Colorectal Adenocarcinoma	R522Efs*22	OncoKB: NA;CIViC: NA;MyCancerGenome: not present;CancerHotspot: no;3DHotspot: no	SIFT: NA;Polyphen-2: NA	Frame_Shift_Del	DEL	Diploid	2	NA	NA	NA	2	234681161	234681161	A	-	2:g.234681161del	ENST00000305139.6:c.1560del							19141	44686					34	CCLE	KCLB	epithelial; monolayer	ACH-000999			63 hrs	Asian	0.06		0		RPMI 1640 with L-glutamine (300mg/L), 90%; heat inactivated fetal bovine serum (FBS),10%	Carcinoma	NS
Cancer Cell Line Encyclopedia (Broad, 2019)	1A10	SNU1077_ENDOMETRIUM	Endometrial Cancer	Endometrial Carcinoma	E179G	OncoKB: NA;CIViC: NA;MyCancerGenome: not present;CancerHotspot: no;3DHotspot: no	SIFT: impact: tolerated, score: 0.1;Polyphen-2: impact: probably_damaging, score: 0.967	Missense_Mutation	SNP	Diploid		NA	NA	NA	2	234545704	234545704	A	G	2:g.234545704A>G	ENST00000344644.5:c.536A>G							247	44682	3.1857e-05		rs557498592		60	CCLE	KCLB	polypoid; monolayer	ACH-000302			43 hrs	Asian	0.5526		2		RPMI 1640 with L-glutamine (300mg/L), 90%; heat inactivated fetal bovine serum (FBS),10%	Carcinoma	carcinosarcoma-malignant_mesodermal_mixed_tumour
Cancer Cell Line Encyclopedia (Broad, 2019)	1A1	SNU1272_KIDNEY	Renal Cell Carcinoma	Renal Clear Cell Carcinoma	G8R	OncoKB: NA;CIViC: NA;MyCancerGenome: not present;CancerHotspot: no;3DHotspot: no	SIFT: NA;Polyphen-2: NA	Missense_Mutation	SNP	Diploid		NA	NA	NA	2	234668955	234668955	G	A	2:g.234668955G>A	ENST00000305208.5:c.22G>A							239	44682	7.97556e-06	Uncertain_significance	rs749552053		63	CCLE	KCLB	epithelial; monolayer	ACH-000513			153 hrs	Asian	0.251		0		RPMI 1640 with L-glutamine (300mg/L), 90%; heat inactivated fetal bovine serum (FBS),10%	Carcinoma	clear_cell_renal_cell_carcinoma
Cancer Cell Line Encyclopedia (Broad, 2019)	2B7	SNU16_STOMACH	Esophagogastric Cancer	Esophageal Squamous Cell Carcinoma	A161T	OncoKB: NA;CIViC: NA;MyCancerGenome: not present;CancerHotspot: no;3DHotspot: no	SIFT: impact: deleterious, score: 0;Polyphen-2: impact: probably_damaging, score: 0.933	Missense_Mutation	SNP	Diploid		NA	NA	NA	4	69962719	69962719	G	A	4:g.69962719G>A	ENST00000305231.7:c.481G>A							268	44713			rs756445459		33	CCLE	NIBRI		ACH-000581				Asian	0.4946		1			Carcinoma	undifferentiated_adenocarcinoma
Cancer Cell Line Encyclopedia (Broad, 2019)	3A1	SNU175_LARGE_INTESTINE	Colorectal Cancer	Colorectal Adenocarcinoma	L13F	OncoKB: NA;CIViC: NA;MyCancerGenome: not present;CancerHotspot: no;3DHotspot: no	SIFT: impact: tolerated, score: 0.3;Polyphen-2: impact: benign, score: 0.42	Missense_Mutation	SNP	Diploid	1	NA	NA	NA	5	35991306	35991306	G	A	5:g.35991306G>A	ENST00000274278.3:c.37C>T							5504	44743					56	CCLE	KCLB	lymphoblast-like, round; suspention	ACH-000989			33 hrs	Asian	0.0927		0		RPMI 1640 with L-glutamine (300mg/L), 90%; heat inactivated fetal bovine serum (FBS),10%	Carcinoma	NS
Cancer Cell Line Encyclopedia (Broad, 2019)	1A9	SNU201_CENTRAL_NERVOUS_SYSTEM	Glioma	Glioblastoma Multiforme	G35R	OncoKB: NA;CIViC: NA;MyCancerGenome: not present;CancerHotspot: no;3DHotspot: no	SIFT: NA;Polyphen-2: NA	Missense_Mutation	SNP	Diploid		NA	NA	NA	2	234580683	234580683	G	A	2:g.234580683G>A	ENST00000354728.4:c.103G>A							230	44682					58	CCLE	KCLB	spendle; monolayer	ACH-000623			61 hrs	Asian	0.5093		1		RPMI 1640 with L-glutamine(300mg/L), 90%; heat inactivatedfetal bovine serum (FBS), 10%	Glioma	astrocytoma_Grade_IV
Cancer Cell Line Encyclopedia (Broad, 2019)	1A5	SNU324_PANCREAS	Pancreatic Cancer	Pancreatic Adenocarcinoma	P10L	OncoKB: NA;CIViC: NA;MyCancerGenome: not present;CancerHotspot: no;3DHotspot: no	SIFT: NA;Polyphen-2: NA	Missense_Mutation	SNP	Diploid		NA	NA	NA	2	234621666	234621666	C	T	2:g.234621666C>T	ENST00000373414.3:c.29C>T							1402	44682					50	CCLE	KCLB	epithelial;monolayer and floating	ACH-000933			52 hrs	Asian	0.2226		0		RPMI 1640 with L-glutamine (300mg/L), 90%; heat inactivated fetal bovine serum (FBS),10%	Carcinoma	NS
Cancer Cell Line Encyclopedia (Broad, 2019)	2B4	SNU349_KIDNEY	Renal Cell Carcinoma	Renal Clear Cell Carcinoma	K334R	OncoKB: NA;CIViC: NA;MyCancerGenome: not present;CancerHotspot: no;3DHotspot: no	SIFT: impact: deleterious, score: 0;Polyphen-2: impact: probably_damaging, score: 0.996	Missense_Mutation	SNP	Diploid		NA	NA	NA	4	70355158	70355158	T	C	4:g.70355158T>C	ENST00000305107.6:c.1001A>G							995	44715					68	CCLE	KCLB	epithelial adherent	ACH-000907		46.5	120hrs	Asian	0.4648	5%DMSO	1		RPMI+10%FBS	Carcinoma	clear_cell_renal_cell_carcinoma
Cancer Cell Line Encyclopedia (Broad, 2019)	1A7	SNU407_LARGE_INTESTINE	Colorectal Cancer	Colorectal Adenocarcinoma	R3H	OncoKB: NA;CIViC: NA;MyCancerGenome: not present;CancerHotspot: no;3DHotspot: no	SIFT: NA;Polyphen-2: NA	Missense_Mutation	SNP	Diploid		NA	NA	NA	2	234590591	234590591	G	A	2:g.234590591G>A	ENST00000373426.3:c.8G>A							2635	44682					37	CCLE	KCLB	epithelial; monolayer	ACH-000955			42 hrs	Asian	0.0895		0		RPMI 1640 with L-glutamine (300mg/L), 90%; heat inactivated fetal bovine serum (FBS),10%	Carcinoma	NS
Cancer Cell Line Encyclopedia (Broad, 2019)	2A1	SNU601_STOMACH	Esophagogastric Cancer	Esophageal Squamous Cell Carcinoma	F206S	OncoKB: NA;CIViC: NA;MyCancerGenome: not present;CancerHotspot: no;3DHotspot: no	SIFT: impact: deleterious, score: 0.01;Polyphen-2: impact: probably_damaging, score: 0.936	Missense_Mutation	SNP	Diploid		NA	NA	NA	4	70512746	70512746	A	G	4:g.70512746A>G	ENST00000503640.1:c.617T>C							358	44713					34	CCLE	KCLB	epithelial; monolayer	ACH-000736				Asian	0.3853		0	korea	RPMI 1640 with L-glutamine (300mg/L), 90%; heat inactivated fetal bovine serum (FBS),10%	Carcinoma	NS
Cancer Cell Line Encyclopedia (Broad, 2019)	1A8	SNU668_STOMACH	Esophagogastric Cancer	Esophageal Squamous Cell Carcinoma	S104R	OncoKB: NA;CIViC: NA;MyCancerGenome: not present;CancerHotspot: no;3DHotspot: no	SIFT: impact: tolerated, score: 0.63;Polyphen-2: impact: benign, score: 0.062	Missense_Mutation	SNP	Diploid	1	NA	NA	NA	2	234526663	234526663	A	C	2:g.234526663A>C	ENST00000373450.4:c.310A>C							226	44682					63	CCLE	KCLB	epithelial; monolayer	ACH-000344				Asian	0.9177		0	korea	RPMI 1640 with L-glutamine (300mg/L), 90%; heat inactivated fetal bovine serum (FBS),10%	Carcinoma	signet_ring_adenocarcinoma
Cancer Cell Line Encyclopedia (Broad, 2019)	1A10	SNU738_CENTRAL_NERVOUS_SYSTEM	Glioma	Glioblastoma Multiforme	E67G	OncoKB: NA;CIViC: NA;MyCancerGenome: not present;CancerHotspot: no;3DHotspot: no	SIFT: impact: tolerated, score: 0.56;Polyphen-2: impact: benign, score: 0	Missense_Mutation	SNP	Diploid		NA	NA	NA	2	234545368	234545368	A	G	2:g.234545368A>G	ENST00000344644.5:c.200A>G							396	44682	6.76289e-05		rs780692126		40	CCLE	KCLB	spindle; monolayer	ACH-000807			56 hrs	Asian	0.5617		2		RPMI 1640 with L-glutamine (300mg/L), 90%; heat inactivated fetal bovine serum (FBS),10%	Glioma	oligodendroglioma
Cancer Cell Line Encyclopedia (Broad, 2019)	1A6	SNU81_LARGE_INTESTINE	Colorectal Cancer	Colorectal Adenocarcinoma	R10I	OncoKB: NA;CIViC: NA;MyCancerGenome: not present;CancerHotspot: no;3DHotspot: no	SIFT: impact: tolerated, score: 0.18;Polyphen-2: impact: benign, score: 0.001	Missense_Mutation	SNP	Diploid		NA	NA	NA	2	234601679	234601679	G	T	2:g.234601679G>T	ENST00000305139.6:c.29G>T							7441	44682					53	CCLE	KCLB	epithelial; monolayer	ACH-000991			30 hrs	Asian	0.0815		0		RPMI 1640 with L-glutamine (300mg/L), 90%; heat inactivated fetal bovine serum (FBS),10%	Carcinoma	NS
Cancer Cell Line Encyclopedia (Broad, 2019)	2B10	SNU899_UPPER_AERODIGESTIVE_TRACT	Esophagogastric Cancer	Esophageal Poorly Differentiated Carcinoma	G494L	OncoKB: NA;CIViC: NA;MyCancerGenome: not present;CancerHotspot: no;3DHotspot: no	SIFT: impact: deleterious, score: 0;Polyphen-2: impact: probably_damaging, score: 0.982	Missense_Mutation	DNP			NA	NA	NA	4	69696490	69696491	GG	TT	4:g.69696490_69696491delinsTT	ENST00000265403.7:c.1480_1481delinsTT							342	44718					56	CCLE	KCLB	epithelial; monolayer	ACH-000692			48 hrs	Asian	0.5095		2		RPMI 1640 with L-glutamine (300mg/L), 90%; heat inactivated fetal bovine serum (FBS),10%	Carcinoma	squamous_cell_carcinoma
Cancer Cell Line Encyclopedia (Broad, 2019)	2B15	SNUC1_LARGE_INTESTINE	Colorectal Cancer	Colorectal Adenocarcinoma	A286G	OncoKB: NA;CIViC: NA;MyCancerGenome: not present;CancerHotspot: no;3DHotspot: no	SIFT: impact: deleterious, score: 0;Polyphen-2: impact: possibly_damaging, score: 0.756	Missense_Mutation	SNP	Diploid		NA	NA	NA	4	69533774	69533774	G	C	4:g.69533774G>C	ENST00000338206.5:c.857C>G							458	44714					71	CCLE	NIBRI		ACH-000722				Asian	0.5149		1			Carcinoma	adenocarcinoma
Cancer Cell Line Encyclopedia (Broad, 2019)	1A4	SNUC2A_LARGE_INTESTINE	Colorectal Cancer	Colorectal Adenocarcinoma	Y175H	OncoKB: NA;CIViC: NA;MyCancerGenome: not present;CancerHotspot: no;3DHotspot: no	SIFT: NA;Polyphen-2: NA	Missense_Mutation	SNP	Diploid		NA	NA	NA	2	234627989	234627989	T	C	2:g.234627989T>C	ENST00000373409.3:c.523T>C							3115	44682					43	CCLE	NIBRI		ACH-000967				Asian	0.1034		0			Carcinoma	adenocarcinoma
Cancer Cell Line Encyclopedia (Broad, 2019)	1A8	SNUC2B_LARGE_INTESTINE	Colorectal Cancer	Colorectal Adenocarcinoma	C72Y	OncoKB: NA;CIViC: NA;MyCancerGenome: not present;CancerHotspot: no;3DHotspot: no	SIFT: impact: tolerated, score: 1;Polyphen-2: impact: benign, score: 0.012	Missense_Mutation	SNP			NA	NA	NA	2	234526568	234526568	G	A	2:g.234526568G>A	ENST00000373450.4:c.215G>A							2581	44682					43	COSMIC_MINT			ACH-001199										Carcinoma	adenocarcinoma
Cancer Cell Line Encyclopedia (Broad, 2019)	1A7	SNUC4_LARGE_INTESTINE	Colorectal Cancer	Colorectal Adenocarcinoma	S122Ffs*8	OncoKB: NA;CIViC: NA;MyCancerGenome: not present;CancerHotspot: no;3DHotspot: no	SIFT: NA;Polyphen-2: NA	Frame_Shift_Ins	INS	Diploid	1	NA	NA	NA	2	234590940	234590941	-	T	2:g.234590940_234590941insT	ENST00000373426.3:c.364dup							2200	44682					35	CCLE	KCLB	epithelial; monolayer	ACH-000959			27 hrs	Asian	0.0337		0		RPMI 1640 with L-glutamine (300mg/L), 90%; heat inactivated fetal bovine serum (FBS),10%	Carcinoma	adenocarcinoma
Cancer Cell Line Encyclopedia (Broad, 2019)	1A3	SNUC5_LARGE_INTESTINE	Colorectal Cancer	Colorectal Adenocarcinoma	L173*	OncoKB: NA;CIViC: NA;MyCancerGenome: not present;CancerHotspot: no;3DHotspot: no	SIFT: NA;Polyphen-2: NA	Frame_Shift_Del	DEL	Diploid	5	NA	NA	NA	2	234638283	234638283	T	-	2:g.234638283del	ENST00000482026.1:c.518del							2990	44682					77	CCLE	KCLB	epithelial; monolayer	ACH-000970			67 hrs	Asian	0.0966		0		RPMI 1640 with L-glutamine (300mg/L), 90%; heat inactivated fetal bovine serum (FBS),10%	Carcinoma	adenocarcinoma
Cancer Cell Line Encyclopedia (Broad, 2019)	2B10	SUDHL6_HAEMATOPOIETIC_AND_LYMPHOID_TISSUE	Mature B-Cell Neoplasms	Diffuse Large B-Cell Lymphoma, NOS	N37I	OncoKB: NA;CIViC: NA;MyCancerGenome: not present;CancerHotspot: no;3DHotspot: no	SIFT: impact: deleterious, score: 0;Polyphen-2: impact: probably_damaging, score: 0.996	Missense_Mutation	SNP			NA	NA	NA	4	69681847	69681847	A	T	4:g.69681847A>T	ENST00000265403.7:c.110A>T							501	44713					43	CCLE	DSMZ	SUSPENSION	ACH-000611	B-cell non-Hodgkin lymphoma	48		Caucasian	0.2067	5% DMSO	0		RPMI-1640+ 20% FBS	Lymphoid_Neoplasm	diffuse_large_B_cell_lymphoma
Cancer Cell Line Encyclopedia (Broad, 2019)	1A4	SUDHL8_HAEMATOPOIETIC_AND_LYMPHOID_TISSUE	Mature B-Cell Neoplasms	Diffuse Large B-Cell Lymphoma, NOS	R126W	OncoKB: NA;CIViC: NA;MyCancerGenome: not present;CancerHotspot: no;3DHotspot: no	SIFT: NA;Polyphen-2: NA	Missense_Mutation	SNP	Diploid	1	NA	NA	NA	2	234627842	234627842	A	T	2:g.234627842A>T	ENST00000373409.3:c.376A>T							398	44682					59	CCLE	DSMZ	round single cells growing in suspention	ACH-000656			~ 48-72 hrs	Caucasian	0.2746		0		80% RPMI 1640 +20% h.i. FBS	Lymphoid_Neoplasm	diffuse_large_B_cell_lymphoma
Cancer Cell Line Encyclopedia (Broad, 2019)	2B4	SUIT2_PANCREAS	Pancreatic Cancer	Pancreatic Adenocarcinoma	K455R	OncoKB: NA;CIViC: NA;MyCancerGenome: not present;CancerHotspot: no;3DHotspot: no	SIFT: impact: deleterious, score: 0.03;Polyphen-2: impact: probably_damaging, score: 0.988	Missense_Mutation	SNP	Diploid		NA	NA	NA	4	70346575	70346575	T	C	4:g.70346575T>C	ENST00000305107.6:c.1364A>G							373	44718					73	CCLE	HSSRB	adherent epithelial-like	ACH-000652	moderately differentiated tubular adenocarcinoma	40.6	38.2 hrs	Asian	0.4191	5% DMSO	1	japan	EMEM+10% FBS	Carcinoma	ductal_carcinoma
Cancer Cell Line Encyclopedia (Broad, 2019)	3A1	SUPB8_HAEMATOPOIETIC_AND_LYMPHOID_TISSUE	Cancer of Unknown Primary	Cancer of Unknown Primary	A244T	OncoKB: NA;CIViC: NA;MyCancerGenome: not present;CancerHotspot: no;3DHotspot: no	SIFT: impact: tolerated, score: 0.14;Polyphen-2: impact: possibly_damaging, score: 0.893	Missense_Mutation	SNP		1	NA	NA	NA	5	35965601	35965601	C	T	5:g.35965601C>T	ENST00000274278.3:c.730G>A							124	44746									ACH-002308
Cancer Cell Line Encyclopedia (Broad, 2019)	1A7	SUPHD1_HAEMATOPOIETIC_AND_LYMPHOID_TISSUE	Hodgkin Lymphoma	Hodgkin Lymphoma	S122Qfs*12	OncoKB: NA;CIViC: NA;MyCancerGenome: not present;CancerHotspot: no;3DHotspot: no	SIFT: NA;Polyphen-2: NA	Frame_Shift_Del	DEL	Diploid	1	NA	NA	NA	2	234590941	234590941	T	-	2:g.234590941del	ENST00000373426.3:c.364del							1614	44682					37	CCLE	DSMZ	Supsension	ACH-001203				Caucasian	0.3258	5% DMSO	0		McCOY'S 5A+20% FBS	Lymphoid_Neoplasm	Hodgkin_lymphoma
Cancer Cell Line Encyclopedia (Broad, 2019)	3A1	SW1271_LUNG	Small Cell Lung Cancer	Small Cell Lung Cancer	S309Y	OncoKB: NA;CIViC: NA;MyCancerGenome: not present;CancerHotspot: no;3DHotspot: no	SIFT: impact: tolerated, score: 0.82;Polyphen-2: impact: benign, score: 0.033	Missense_Mutation	SNP	Amp		NA	NA	NA	5	35957439	35957439	G	T	5:g.35957439G>T	ENST00000274278.3:c.926C>A							1194	44747					69	CCLE	ATCC	adherent; epithelial	ACH-000890				Caucasian	0.6488	5%DMSO	1		Leibovitz's L-15 Medium + 10%FBS	Carcinoma	small_cell_carcinoma
Cancer Cell Line Encyclopedia (Broad, 2019)	3A1	SW1417_LARGE_INTESTINE	Colorectal Cancer	Colorectal Adenocarcinoma	L304S	OncoKB: NA;CIViC: NA;MyCancerGenome: not present;CancerHotspot: no;3DHotspot: no	SIFT: impact: deleterious, score: 0.01;Polyphen-2: impact: benign, score: 0.314	Missense_Mutation	SNP	Diploid		NA	NA	NA	5	35957454	35957454	A	G	5:g.35957454A>G	ENST00000274278.3:c.911T>C							248	44747					53	CCLE	NIBRI		ACH-000236				Caucasian	0.5683		1			Carcinoma	adenocarcinoma
Cancer Cell Line Encyclopedia (Broad, 2019)	3A2	SW403_LARGE_INTESTINE	Colorectal Cancer	Colorectal Adenocarcinoma	R515H	OncoKB: NA;CIViC: NA;MyCancerGenome: not present;CancerHotspot: no;3DHotspot: no	SIFT: impact: tolerated, score: 0.24;Polyphen-2: impact: possibly_damaging, score: 0.59	Missense_Mutation	SNP	Diploid	5	NA	NA	NA	5	36035828	36035828	C	T	5:g.36035828C>T	ENST00000282507.3:c.1544G>A							393	44749	0.00010268		rs138640717		51	CCLE	NIBRI		ACH-000820				Caucasian	0.4759		1			Carcinoma	adenocarcinoma
Cancer Cell Line Encyclopedia (Broad, 2019)	1A4	SW48_LARGE_INTESTINE	Colorectal Cancer	Colorectal Adenocarcinoma	W173Lfs*7	OncoKB: NA;CIViC: NA;MyCancerGenome: not present;CancerHotspot: no;3DHotspot: no	SIFT: NA;Polyphen-2: NA	Frame_Shift_Ins	INS	Diploid	2	NA	NA	NA	2	234627976	234627977	-	T	2:g.234627976_234627977insT	ENST00000373409.3:c.517dup							2768	44682					82	CCLE	NIBRI		ACH-000958				Caucasian	0.1111		0			Carcinoma	adenocarcinoma
Cancer Cell Line Encyclopedia (Broad, 2019)	1A E2-5	SW684_SOFT_TISSUE	Cancer of Unknown Primary	Cancer of Unknown Primary	R340Q	OncoKB: NA;CIViC: NA;MyCancerGenome: not present;CancerHotspot: no;3DHotspot: no	SIFT: impact: tolerated, score: 0.58;Polyphen-2: impact: benign, score: 0.223	Missense_Mutation	SNP			NA	NA	NA	2	234676520	234676520	G	A	2:g.234676520G>A	ENST00000305139.6:c.1019G>A							4350	44684									ACH-002309
Cancer Cell Line Encyclopedia (Broad, 2019)	1A7	SW780_URINARY_TRACT	Bladder Cancer	Bladder Urothelial Carcinoma	G67E	OncoKB: NA;CIViC: NA;MyCancerGenome: not present;CancerHotspot: no;3DHotspot: no	SIFT: NA;Polyphen-2: NA	Missense_Mutation	SNP	Diploid		NA	NA	NA	2	234590783	234590783	G	A	2:g.234590783G>A	ENST00000373426.3:c.200G>A							233	44682					80	CCLE	ATCC	Adherent	ACH-000384		92.9		Caucasian	0.4021	5% DMSO	0		L15 + 10% FBS	Carcinoma	transitional_cell_carcinoma
Cancer Cell Line Encyclopedia (Broad, 2019)	2A3	SW872_SOFT_TISSUE	Cancer of Unknown Primary	Cancer of Unknown Primary	M290I	OncoKB: NA;CIViC: NA;MyCancerGenome: not present;CancerHotspot: no;3DHotspot: no	SIFT: impact: tolerated, score: 0.12;Polyphen-2: impact: benign, score: 0.138	Missense_Mutation	SNP		1	NA	NA	NA	4	69798472	69798472	C	T	4:g.69798472C>T	ENST00000251566.4:c.870G>A							257	44715									ACH-002310
Cancer Cell Line Encyclopedia (Broad, 2019)	3A1	SW982_SOFT_TISSUE	Cancer of Unknown Primary	Cancer of Unknown Primary	G50D	OncoKB: NA;CIViC: NA;MyCancerGenome: not present;CancerHotspot: no;3DHotspot: no	SIFT: impact: deleterious, score: 0;Polyphen-2: impact: probably_damaging, score: 0.996	Missense_Mutation	SNP			NA	NA	NA	5	35988599	35988599	C	T	5:g.35988599C>T	ENST00000274278.3:c.149G>A							551	44744									ACH-001274
Cancer Cell Line Encyclopedia (Broad, 2019)	3A1	T3M4_PANCREAS	Pancreatic Cancer	Pancreatic Adenocarcinoma	T421A	OncoKB: NA;CIViC: NA;MyCancerGenome: not present;CancerHotspot: no;3DHotspot: no	SIFT: impact: tolerated, score: 1;Polyphen-2: impact: benign, score: 0.001	Missense_Mutation	SNP	Amp		NA	NA	NA	5	35955781	35955781	T	C	5:g.35955781T>C	ENST00000274278.3:c.1261A>G							201	44748					64	CCLE	RIKEN	Adherent	ACH-000085		144.4		Asian	0.7957	5% DMSO	1		HAMSF10+ 10% FBS	Carcinoma	ductal_carcinoma
Cancer Cell Line Encyclopedia (Broad, 2019)	2A3	TALL1_HAEMATOPOIETIC_AND_LYMPHOID_TISSUE	T-Lymphoblastic Leukemia/Lymphoma	T-Lymphoblastic Leukemia/Lymphoma	G175V	OncoKB: NA;CIViC: NA;MyCancerGenome: not present;CancerHotspot: no;3DHotspot: no	SIFT: impact: deleterious, score: 0.01;Polyphen-2: impact: possibly_damaging, score: 0.791	Missense_Mutation	SNP	Diploid		NA	NA	NA	4	69816955	69816955	C	A	4:g.69816955C>A	ENST00000251566.4:c.524G>T							312	44713					28	CCLE	NIBRI		ACH-000197		83.1			0.3816					Lymphoid_Neoplasm	acute_lymphoblastic_T_cell_leukaemia
Cancer Cell Line Encyclopedia (Broad, 2019)	2B15	TASK1_CENTRAL_NERVOUS_SYSTEM	Cancer of Unknown Primary	Cancer of Unknown Primary	M39I	OncoKB: NA;CIViC: NA;MyCancerGenome: not present;CancerHotspot: no;3DHotspot: no	SIFT: impact: tolerated, score: 0.75;Polyphen-2: impact: benign, score: 0.06	Missense_Mutation	SNP			NA	NA	NA	4	69536220	69536220	C	T	4:g.69536220C>T	ENST00000338206.5:c.117G>A							225	44713									ACH-001670
Cancer Cell Line Encyclopedia (Broad, 2019)	2B28	TC138_BONE	Mixed Cancer Types	Mixed Cancer Types	E52K	OncoKB: NA;CIViC: NA;MyCancerGenome: not present;CancerHotspot: no;3DHotspot: no	SIFT: impact: deleterious, score: 0.03;Polyphen-2: impact: probably_damaging, score: 0.955	Missense_Mutation	SNP			NA	NA	NA	4	70146372	70146372	G	A	4:g.70146372G>A	ENST00000335568.5:c.154G>A							131	44713
Cancer Cell Line Encyclopedia (Broad, 2019)	UGT8	TC32_BONE	Bone Cancer	Ewing SarcomaÃƒ_	H51R	OncoKB: NA;CIViC: NA;MyCancerGenome: not present;CancerHotspot: no;3DHotspot: no	SIFT: impact: tolerated, score: 0.3;Polyphen-2: impact: benign, score: 0	Missense_Mutation	SNP	Diploid		NA	NA	NA	4	115544188	115544188	A	G	4:g.115544188A>G	ENST00000310836.6:c.152A>G							118	44714						COSMIC			ACH-001205					0.1161		0			Ewings_Sarcoma-Peripheral_Primitive_Neuroectodermal_Tumour	NS
Cancer Cell Line Encyclopedia (Broad, 2019)	1A9	TCCSUP_URINARY_TRACT	Bladder Cancer	Bladder Urothelial Carcinoma	L173R	OncoKB: NA;CIViC: NA;MyCancerGenome: not present;CancerHotspot: no;3DHotspot: no	SIFT: NA;Polyphen-2: NA	Missense_Mutation	SNP	Diploid		NA	NA	NA	2	234581098	234581098	T	G	2:g.234581098T>G	ENST00000354728.4:c.518T>G							361	44682					67	CCLE	NIBRI		ACH-000720				Caucasian	0.5032		1			Carcinoma	transitional_cell_carcinoma
Cancer Cell Line Encyclopedia (Broad, 2019)	3A1	TCYIK_CERVIX	Cancer of Unknown Primary	Cancer of Unknown Primary	L7M	OncoKB: NA;CIViC: NA;MyCancerGenome: not present;CancerHotspot: no;3DHotspot: no	SIFT: impact: deleterious, score: 0.04;Polyphen-2: impact: probably_damaging, score: 0.99	Missense_Mutation	SNP			NA	NA	NA	5	35991324	35991324	G	T	5:g.35991324G>T	ENST00000274278.3:c.19C>A							252	44743									ACH-002201
Cancer Cell Line Encyclopedia (Broad, 2019)	2A3	TE12_OESOPHAGUS	Cancer of Unknown Primary	Cancer of Unknown Primary	R445T	OncoKB: NA;CIViC: NA;MyCancerGenome: not present;CancerHotspot: no;3DHotspot: no	SIFT: impact: tolerated, score: 0.19;Polyphen-2: impact: possibly_damaging, score: 0.674	Missense_Mutation	SNP			NA	NA	NA	4	69795781	69795781	C	G	4:g.69795781C>G	ENST00000251566.4:c.1334G>C							253	44718									ACH-002311
Cancer Cell Line Encyclopedia (Broad, 2019)	1A1	TE4_OESOPHAGUS	Esophagogastric Cancer	Esophageal Adenocarcinoma	G28V	OncoKB: NA;CIViC: NA;MyCancerGenome: not present;CancerHotspot: no;3DHotspot: no	SIFT: NA;Polyphen-2: NA	Missense_Mutation	SNP	Diploid		NA	NA	NA	2	234669016	234669016	G	T	2:g.234669016G>T	ENST00000305208.5:c.83G>T							1074	44682						CCLE	RIKEN	epithelial-like	ACH-000917				Asian	0.6735		1		RPMI 1640 +10%FBS	Carcinoma	squamous_cell_carcinoma
Cancer Cell Line Encyclopedia (Broad, 2019)	1A9	TE5_OESOPHAGUS	Esophagogastric Cancer	Esophageal Adenocarcinoma	N71S	OncoKB: NA;CIViC: NA;MyCancerGenome: not present;CancerHotspot: no;3DHotspot: no	SIFT: NA;Polyphen-2: NA	Missense_Mutation	SNP	Diploid		NA	NA	NA	2	234580792	234580792	A	G	2:g.234580792A>G	ENST00000354728.4:c.212A>G							463	44682					73	CCLE	Riken	Epithelial-like	ACH-000408				Asian	0.5935	5%DMSO	1		RPMI+10%FBS	Carcinoma	squamous_cell_carcinoma
Cancer Cell Line Encyclopedia (Broad, 2019)	2B10	TE6_OESOPHAGUS	Esophagogastric Cancer	Esophageal Adenocarcinoma	A29D	OncoKB: NA;CIViC: NA;MyCancerGenome: not present;CancerHotspot: no;3DHotspot: no	SIFT: impact: deleterious, score: 0;Polyphen-2: impact: benign, score: 0.197	Missense_Mutation	SNP			NA	NA	NA	4	69681823	69681823	C	A	4:g.69681823C>A	ENST00000265403.7:c.86C>A							432	44713						CCLE	RIKEN	epithelial-like	ACH-000605				Asian	0.7681		1		RPMI 1640 +10%FBS	Carcinoma	squamous_cell_carcinoma
Cancer Cell Line Encyclopedia (Broad, 2019)	1A9	TE9_OESOPHAGUS	Esophagogastric Cancer	Esophageal Adenocarcinoma	W6R	OncoKB: NA;CIViC: NA;MyCancerGenome: not present;CancerHotspot: no;3DHotspot: no	SIFT: NA;Polyphen-2: NA	Missense_Mutation	SNP	Diploid		NA	NA	NA	2	234580596	234580596	T	C	2:g.234580596T>C	ENST00000354728.4:c.16T>C							591	44682						CCLE	RIKEN	Adherent	ACH-000694		106.5		Asian	0.552	5% DMSO	1		RPMI 1640 + 10%FBS	Carcinoma	squamous_cell_carcinoma
Cancer Cell Line Encyclopedia (Broad, 2019)	2A3	TGW_AUTONOMIC_GANGLIA	Cancer of Unknown Primary	Cancer of Unknown Primary	S297L	OncoKB: NA;CIViC: NA;MyCancerGenome: not present;CancerHotspot: no;3DHotspot: no	SIFT: impact: deleterious, score: 0;Polyphen-2: impact: probably_damaging, score: 1	Missense_Mutation	SNP		1	NA	NA	NA	4	69798452	69798452	G	A	4:g.69798452G>A	ENST00000251566.4:c.890C>T							497	44715									ACH-001674
Cancer Cell Line Encyclopedia (Broad, 2019)	1A7	TK_HAEMATOPOIETIC_AND_LYMPHOID_TISSUE	Cancer of Unknown Primary	Cancer of Unknown Primary	M285V	OncoKB: NA;CIViC: NA;MyCancerGenome: not present;CancerHotspot: no;3DHotspot: no	SIFT: NA;Polyphen-2: NA	Missense_Mutation	SNP			NA	NA	NA	2	234591436	234591436	A	G	2:g.234591436A>G	ENST00000373426.3:c.853A>G							293	44682									ACH-002313
Cancer Cell Line Encyclopedia (Broad, 2019)	1A9	TM31_CENTRAL_NERVOUS_SYSTEM	Glioma	Glioblastoma Multiforme	M1?	OncoKB: NA;CIViC: NA;MyCancerGenome: not present;CancerHotspot: no;3DHotspot: no	SIFT: NA;Polyphen-2: NA	Translation_Start_Site	SNP	Diploid		NA	NA	NA	2	234580581	234580581	A	G	2:g.234580581A>G	ENST00000354728.4:c.1A>G							282	44682						CCLE	RIKEN	fibroblast-like	ACH-000592				Asian	0.5798		1		MEM +10%FBS	Glioma	astrocytoma
Cancer Cell Line Encyclopedia (Broad, 2019)	3A1	TT_OESOPHAGUS	Esophagogastric Cancer	Esophageal Adenocarcinoma	G382D	OncoKB: NA;CIViC: NA;MyCancerGenome: not present;CancerHotspot: no;3DHotspot: no	SIFT: impact: deleterious, score: 0;Polyphen-2: impact: probably_damaging, score: 0.999	Missense_Mutation	SNP	Diploid		NA	NA	NA	5	35955897	35955897	C	T	5:g.35955897C>T	ENST00000274278.3:c.1145G>A							422	44748							HSSRB		ACH-000561		51.8	1.2 days		0.6974	10%DMSO	2		DMEM:HAM's F12 1:1 +10% FBS
Cancer Cell Line Encyclopedia (Broad, 2019)	1A4	TTC442_SOFT_TISSUE	Mixed Cancer Types	Mixed Cancer Types	H105R	OncoKB: NA;CIViC: NA;MyCancerGenome: not present;CancerHotspot: no;3DHotspot: no	SIFT: NA;Polyphen-2: NA	Missense_Mutation	SNP			NA	NA	NA	2	234627780	234627780	A	G	2:g.234627780A>G	ENST00000373409.3:c.314A>G							281	44682
Cancer Cell Line Encyclopedia (Broad, 2019)	2B11	TUHR4TKB_KIDNEY	Kidney Cancer	Renal Cell Carcinoma	N125K	OncoKB: NA;CIViC: NA;MyCancerGenome: not present;CancerHotspot: no;3DHotspot: no	SIFT: impact: tolerated, score: 1;Polyphen-2: impact: benign, score: 0.001	Missense_Mutation	SNP	Diploid		NA	NA	NA	4	70080066	70080066	G	T	4:g.70080066G>T	ENST00000446444.1:c.375C>A							242	44713						CCLE	RIKEN	adherent	ACH-000495		88.4		Asian	0.6243	5% DMSO	1		DMEM+10% FBS	Carcinoma	NS
Cancer Cell Line Encyclopedia (Broad, 2019)	1A4	TUR_HAEMATOPOIETIC_AND_LYMPHOID_TISSUE	Cancer of Unknown Primary	Cancer of Unknown Primary	Q23K	OncoKB: NA;CIViC: NA;MyCancerGenome: not present;CancerHotspot: no;3DHotspot: no	SIFT: NA;Polyphen-2: NA	Missense_Mutation	SNP			NA	NA	NA	2	234627533	234627533	C	A	2:g.234627533C>A	ENST00000373409.3:c.67C>A							322	44682									ACH-002314
Cancer Cell Line Encyclopedia (Broad, 2019)	2B10	TYKNU_OVARY	Ovarian Cancer	Ovarian Carcinosarcoma/Malignant Mixed Mesodermal Tumor	Q91I	OncoKB: NA;CIViC: NA;MyCancerGenome: not present;CancerHotspot: no;3DHotspot: no	SIFT: impact: tolerated, score: 0.1;Polyphen-2: impact: benign, score: 0.047	Missense_Mutation	DNP			NA	NA	NA	4	69682008	69682009	CA	AT	4:g.69682008_69682009delinsAT	ENST00000265403.7:c.271_272delinsAT							306	44713						CCLE	NIBRI		ACH-000430				Asian	0.8177		1			Carcinoma	undifferentiated_carcinoma
Cancer Cell Line Encyclopedia (Broad, 2019)	3A2	U251MG_CENTRAL_NERVOUS_SYSTEM	Glioma	Glioblastoma Multiforme	G467Rfs*15	OncoKB: NA;CIViC: NA;MyCancerGenome: not present;CancerHotspot: no;3DHotspot: no	SIFT: NA;Polyphen-2: NA	Frame_Shift_Del	DEL	Diploid	1	NA	NA	NA	5	36035976	36035977	CT	-	5:g.36035976_36035977del	ENST00000282507.3:c.1395_1396del							229	44749	7.95938e-06		rs778271529			CCLE	GNF		ACH-000232	Brain Cancer			Caucasian	0.4335		1			Glioma	astrocytoma
Cancer Cell Line Encyclopedia (Broad, 2019)	3A1	U266B1_HAEMATOPOIETIC_AND_LYMPHOID_TISSUE	Mature B-Cell Neoplasms	Plasma Cell Myeloma	A164T	OncoKB: NA;CIViC: NA;MyCancerGenome: not present;CancerHotspot: no;3DHotspot: no	SIFT: impact: tolerated, score: 0.14;Polyphen-2: impact: benign, score: 0.292	Missense_Mutation	SNP	Diploid	1	NA	NA	NA	5	35965841	35965841	C	T	5:g.35965841C>T	ENST00000274278.3:c.490G>A							352	44746					53	CCLE	ATCC	Suspension Lymphoblast	ACH-000626	myeloma	198.1		Caucasian	0.2833	5%DMSO	0		RPMI1640+15%FBS	Lymphoid_Neoplasm	plasma_cell_myeloma
Cancer Cell Line Encyclopedia (Broad, 2019)	2A E2-6	U2OS_BONE	Bone Cancer	Osteosarcoma	P276L	OncoKB: NA;CIViC: NA;MyCancerGenome: not present;CancerHotspot: no;3DHotspot: no	SIFT: impact: deleterious, score: 0.01;Polyphen-2: impact: probably_damaging, score: 1	Missense_Mutation	SNP	Diploid		NA	NA	NA	4	70465028	70465028	G	A	4:g.70465028G>A	ENST00000457664.2:c.827C>T							288	44714					15	CCLE	ATCC	Adherent	ACH-000364	bone_cancer			Caucasian	0.5104	5% DMSO	1		McCoy's 5A +10%FBS	Osteosarcoma	NS
Cancer Cell Line Encyclopedia (Broad, 2019)	UGT8	U698M_HAEMATOPOIETIC_AND_LYMPHOID_TISSUE	Cancer of Unknown Primary	Cancer of Unknown Primary	D303G	OncoKB: NA;CIViC: NA;MyCancerGenome: not present;CancerHotspot: no;3DHotspot: no	SIFT: impact: deleterious, score: 0.01;Polyphen-2: impact: benign, score: 0.348	Missense_Mutation	SNP			NA	NA	NA	4	115585236	115585236	A	G	4:g.115585236A>G	ENST00000310836.6:c.908A>G							327	44715									ACH-001680
Cancer Cell Line Encyclopedia (Broad, 2019)	2B11	U87MG_CENTRAL_NERVOUS_SYSTEM	Glioma	Glioblastoma Multiforme	A346S	OncoKB: NA;CIViC: NA;MyCancerGenome: not present;CancerHotspot: no;3DHotspot: no	SIFT: impact: tolerated, score: 0.08;Polyphen-2: impact: benign, score: 0.003	Missense_Mutation	SNP	Diploid		NA	NA	NA	4	70071252	70071252	C	A	4:g.70071252C>A	ENST00000446444.1:c.1036G>T							140	44716					44	CCLE	ATCC	Adherent epithelial.	ACH-000075	brain_cancer	66		Caucasian	0.2009	5%DMSO	0		EMEM + 10% FBS	Glioma	astrocytoma
Cancer Cell Line Encyclopedia (Broad, 2019)	2B4	U937_HAEMATOPOIETIC_AND_LYMPHOID_TISSUE	Mature B-Cell Neoplasms	Diffuse Large B-Cell Lymphoma, NOS	Q92K	OncoKB: NA;CIViC: NA;MyCancerGenome: not present;CancerHotspot: no;3DHotspot: no	SIFT: impact: tolerated, score: 1;Polyphen-2: impact: benign, score: 0.001	Missense_Mutation	SNP	Diploid		NA	NA	NA	4	70361306	70361306	G	T	4:g.70361306G>T	ENST00000305107.6:c.274C>A							302	44713					37	CCLE	NIBRI		ACH-000406	histiocytic_lymphoma	115.9		Caucasian	0.8617	5%DMSO	1		RPMI-1640 + 10% FBS	Lymphoid_Neoplasm	diffuse_large_B_cell_lymphoma
Cancer Cell Line Encyclopedia (Broad, 2019)	2B11	UACC812_BREAST	Breast Cancer	Invasive Breast Carcinoma	E142D	OncoKB: NA;CIViC: NA;MyCancerGenome: not present;CancerHotspot: no;3DHotspot: no	SIFT: impact: tolerated, score: 0.11;Polyphen-2: impact: benign, score: 0.019	Missense_Mutation	SNP	Diploid		NA	NA	NA	4	70080015	70080015	C	G	4:g.70080015C>G	ENST00000446444.1:c.426G>C							320	44713					43	CCLE	ATCC	mostly adherent epithelial, some clusters in suspension	ACH-000568	invasive_ductal_carcinoma	219.2		Caucasian	0.5289	5%DMSO	1		RPMI-1640 + 20% FBS	Carcinoma	ductal_carcinoma
Cancer Cell Line Encyclopedia (Broad, 2019)	3A1	UMC11_LUNG	Cancer of Unknown Primary	Cancer of Unknown Primary	L39S	OncoKB: NA;CIViC: NA;MyCancerGenome: not present;CancerHotspot: no;3DHotspot: no	SIFT: impact: deleterious, score: 0;Polyphen-2: impact: benign, score: 0.257	Missense_Mutation	SNP			NA	NA	NA	5	35988632	35988632	A	G	5:g.35988632A>G	ENST00000274278.3:c.116T>C							341	44744									ACH-001417
Cancer Cell Line Encyclopedia (Broad, 2019)	1A9	UMCHOR1_BONE	Mixed Cancer Types	Mixed Cancer Types	K75E	OncoKB: NA;CIViC: NA;MyCancerGenome: not present;CancerHotspot: no;3DHotspot: no	SIFT: NA;Polyphen-2: NA	Missense_Mutation	SNP		1	NA	NA	NA	2	234580803	234580803	A	G	2:g.234580803A>G	ENST00000354728.4:c.223A>G							154	44682
Cancer Cell Line Encyclopedia (Broad, 2019)	2B10	UMUC6_URINARY_TRACT	Mixed Cancer Types	Mixed Cancer Types	R446*	OncoKB: NA;CIViC: NA;MyCancerGenome: not present;CancerHotspot: no;3DHotspot: no	SIFT: NA;Polyphen-2: NA	Nonsense_Mutation	SNP			NA	NA	NA	4	69696346	69696346	A	T	4:g.69696346A>T	ENST00000265403.7:c.1336A>T							516	44718
Cancer Cell Line Encyclopedia (Broad, 2019)	2B7	UW228_CENTRAL_NERVOUS_SYSTEM	Mixed Cancer Types	Mixed Cancer Types	R49K	OncoKB: NA;CIViC: NA;MyCancerGenome: not present;CancerHotspot: no;3DHotspot: no	SIFT: impact: tolerated, score: 0.13;Polyphen-2: impact: benign, score: 0.072	Missense_Mutation	SNP			NA	NA	NA	4	69962384	69962384	G	A	4:g.69962384G>A	ENST00000305231.7:c.146G>A							188	44713
Cancer Cell Line Encyclopedia (Broad, 2019)	2B15	VMRCLCD_LUNG	Non-Small Cell Lung Cancer	Non-Small Cell Lung Cancer	C157S	OncoKB: NA;CIViC: NA;MyCancerGenome: not present;CancerHotspot: no;3DHotspot: no	SIFT: impact: deleterious, score: 0.05;Polyphen-2: impact: possibly_damaging, score: 0.856	Missense_Mutation	SNP	Diploid		NA	NA	NA	4	69535868	69535868	A	T	4:g.69535868A>T	ENST00000338206.5:c.469T>A							724	44713						CCLE	HSRRB	MIX	ACH-001233	lung_cancer			Caucasian	0.6642	5% DMSO	1		EMEM+10% FBS	Carcinoma	adenocarcinoma
Cancer Cell Line Encyclopedia (Broad, 2019)	2A E2-6	VMRCMELG_SKIN	Cancer of Unknown Primary	Cancer of Unknown Primary	R345K	OncoKB: NA;CIViC: NA;MyCancerGenome: not present;CancerHotspot: no;3DHotspot: no	SIFT: impact: deleterious, score: 0.05;Polyphen-2: impact: benign, score: 0.019	Missense_Mutation	SNP			NA	NA	NA	4	70460957	70460957	C	T	4:g.70460957C>T	ENST00000457664.2:c.1034G>A							193	44716									ACH-001704
Cancer Cell Line Encyclopedia (Broad, 2019)	2B7	WIL2NS_HAEMATOPOIETIC_AND_LYMPHOID_TISSUE	Cancer of Unknown Primary	Cancer of Unknown Primary	K182N	OncoKB: NA;CIViC: NA;MyCancerGenome: not present;CancerHotspot: no;3DHotspot: no	SIFT: impact: deleterious, score: 0;Polyphen-2: impact: possibly_damaging, score: 0.885	Missense_Mutation	SNP			NA	NA	NA	4	69962784	69962784	G	T	4:g.69962784G>T	ENST00000305231.7:c.546G>T							354	44713									ACH-002316
Cancer Cell Line Encyclopedia (Broad, 2019)	2B10	WM1799_SKIN	Melanoma	Cutaneous Melanoma	G375E	OncoKB: NA;CIViC: NA;MyCancerGenome: not present;CancerHotspot: no;3DHotspot: no	SIFT: impact: deleterious, score: 0.01;Polyphen-2: impact: probably_damaging, score: 0.995	Missense_Mutation	SNP			NA	NA	NA	4	69693083	69693083	G	A	4:g.69693083G>A	ENST00000265403.7:c.1124G>A							349	44717						CCLE	WISTAR	Adherent	ACH-000661		50.3		Caucasian	0.7784	5%DMSO	1		RPMI-1640 + 10% FBS	Malignant_Melanoma	NS
Cancer Cell Line Encyclopedia (Broad, 2019)	3A2	WM793_SKIN	Melanoma	Cutaneous Melanoma	P151L	OncoKB: NA;CIViC: NA;MyCancerGenome: not present;CancerHotspot: no;3DHotspot: no	SIFT: impact: tolerated, score: 0.37;Polyphen-2: impact: benign, score: 0.006	Missense_Mutation	SNP	Diploid	1	NA	NA	NA	5	36049382	36049382	G	A	5:g.36049382G>A	ENST00000282507.3:c.452C>T							511	44746						CCLE	WISTAR	Adherent	ACH-000827		37.7		Caucasian	0.2175	5%DMSO	0		RPMI-1640 + 10% FBS	Malignant_Melanoma	NS
Cancer Cell Line Encyclopedia (Broad, 2019)	2B15	WM88_SKIN	Melanoma	Cutaneous Melanoma	P395L	OncoKB: NA;CIViC: NA;MyCancerGenome: not present;CancerHotspot: no;3DHotspot: no	SIFT: impact: deleterious, score: 0;Polyphen-2: impact: probably_damaging, score: 0.999	Missense_Mutation	SNP	Diploid		NA	NA	NA	4	69519884	69519884	G	A	4:g.69519884G>A	ENST00000338206.5:c.1184C>T							815	44717						CCLE	GNF		ACH-000899				Caucasian	0.6004		0			Malignant_Melanoma	NS
Cancer Cell Line Encyclopedia (Broad, 2019)	2B15	WM983B_SKIN	Melanoma	Cutaneous Melanoma	T420I	OncoKB: NA;CIViC: NA;MyCancerGenome: not present;CancerHotspot: no;3DHotspot: no	SIFT: impact: deleterious, score: 0.01;Polyphen-2: impact: benign, score: 0.171	Missense_Mutation	SNP	Diploid		NA	NA	NA	4	69519809	69519809	G	A	4:g.69519809G>A	ENST00000338206.5:c.1259C>T							342	44717						CCLE	GNF		ACH-000765				Caucasian	0.8566		1			Malignant_Melanoma	NS
Cancer Cell Line Encyclopedia (Broad, 2019)	3A2	YAPC_PANCREAS	Pancreatic Cancer	Pancreatic Adenocarcinoma	R432K	OncoKB: NA;CIViC: NA;MyCancerGenome: not present;CancerHotspot: no;3DHotspot: no	SIFT: impact: deleterious, score: 0.05;Polyphen-2: impact: possibly_damaging, score: 0.78	Missense_Mutation	SNP	Diploid		NA	NA	NA	5	36037899	36037899	C	T	5:g.36037899C>T	ENST00000282507.3:c.1295G>A							229	44748	3.97978e-06		rs569308019		43	CCLE	DSMZ	Adherent	ACH-000332		72.7		Asian	0.583	10%DMSO	1	japan	RPMI-1640 + 10% FBS	Carcinoma	NS
Cancer Cell Line Encyclopedia (Broad, 2019)	2A1	YKG1_CENTRAL_NERVOUS_SYSTEM	Glioma	Glioblastoma Multiforme	E47V	OncoKB: NA;CIViC: NA;MyCancerGenome: not present;CancerHotspot: no;3DHotspot: no	SIFT: impact: deleterious, score: 0;Polyphen-2: impact: benign, score: 0.398	Missense_Mutation	SNP	Diploid		NA	NA	NA	4	70513223	70513223	T	A	4:g.70513223T>A	ENST00000503640.1:c.140A>T							357	44713						CCLE	GNF		ACH-000570	Brain Cancer			Asian	0.4721		1			Glioma	astrocytoma_Grade_IV
Cancer Cell Line Encyclopedia (Broad, 2019)	2B28	YMB1E_BREAST	Cancer of Unknown Primary	Cancer of Unknown Primary	F119L	OncoKB: NA;CIViC: NA;MyCancerGenome: not present;CancerHotspot: no;3DHotspot: no	SIFT: impact: tolerated, score: 0.21;Polyphen-2: impact: benign, score: 0.003	Missense_Mutation	SNP			NA	NA	NA	4	70146575	70146575	T	A	4:g.70146575T>A	ENST00000335568.5:c.357T>A							261	44713									ACH-002208
Cancer Cell Line Encyclopedia (Broad, 2019)	2B28	ZR751_BREAST	Breast Cancer	Chondrosarcoma	H120Y	OncoKB: NA;CIViC: NA;MyCancerGenome: not present;CancerHotspot: no;3DHotspot: no	SIFT: impact: tolerated, score: 0.33;Polyphen-2: impact: benign, score: 0	Missense_Mutation	SNP	Diploid		NA	NA	NA	4	70146576	70146576	C	T	4:g.70146576C>T	ENST00000335568.5:c.358C>T							251	44713					63	CCLE	ATCC	adherent epithelial	ACH-000097	breast_cancer	88.7		Caucasian	0.3956	5%DMSO	1		RPMI-1640 + 10% FBS	Carcinoma	ductal_carcinoma
Cancer Cell Line Encyclopedia (Broad, 2019)	1A10	ZR7530_BREAST	Breast Cancer	Invasive Breast Carcinoma	D216E	OncoKB: NA;CIViC: NA;MyCancerGenome: not present;CancerHotspot: no;3DHotspot: no	SIFT: impact: tolerated, score: 1;Polyphen-2: impact: benign, score: 0	Missense_Mutation	SNP	Diploid		NA	NA	NA	2	234545816	234545816	C	A	2:g.234545816C>A	ENST00000344644.5:c.648C>A							385	44682	7.0797e-05		rs140439109		47	CCLE	GNF		ACH-000828	breast_cancer		110 hrs	African_american	0.4669		0			Carcinoma	ductal_carcinoma
[truncated: 24 more columns]

## Sheet: GRCH37_hg19
whole-exome sequencing of tumor samples (merged mutation calls: coding region and germ-line filtered)
annoated using GRCH37_hg19 (2009)

## Sheet: UGT1A E2-5
Study of Origin	UGT genes	Sample ID	Cancer Type	Cancer Type Detailed	Protein Change	Annotation	Functional Impact	Mutation Type	Variant Type	Copy #	COSMIC	MS	VS	Center	Chromosome	Start Pos	End Pos	Ref	Var	HGVSg	HGVSc	Allele Freq (T)	Allele Freq (N)	Variant Reads	Ref Reads	Variant Reads (Normal)	Ref Reads (Normal)	# Mut in Sample	Exon	gnomAD	ClinVar	dbSNP	SIGNAL	Age	Annotation Source	Cell Line Source	Characteristics	DepMap ID	Disease Ontology	Doubling Time (hrs)	Doubling Time From Vendor	Ethnicity Category	Fraction Genome Altered	Freezing Medium	Genome Doublings	Geographic Distribution	Growth Medium	Histology	Hist Subtype 1
Cancer Cell Line Encyclopedia (Broad, 2019)	1A1 E2-5	SNU1040_LARGE_INTESTINE	Colorectal Cancer	Colorectal Adenocarcinoma	R441H	OncoKB: NA;CIViC: NA;MyCancerGenome: not present;CancerHotspot: no;3DHotspot: no	SIFT: impact: tolerated, score: 0.06;Polyphen-2: impact: benign, score: 0.127	Missense_Mutation	SNP	Diploid	1	NA	NA	NA	2	234680928	234680928	G	A	2:g.234680928G>A	ENST00000305139.6:c.1322G>A							19141	2022-05-05					34	CCLE	KCLB	epithelial; monolayer	ACH-000999			63 hrs	Asian	0.06		0		RPMI 1640 with L-glutamine (300mg/L), 90%; heat inactivated fetal bovine serum (FBS),10%	Carcinoma	NS
Cancer Cell Line Encyclopedia (Broad, 2019)	1A1 E2-5	RL952_ENDOMETRIUM	Endometrial Cancer	Endometrial Carcinoma	R522Efs*22	OncoKB: NA;CIViC: NA;MyCancerGenome: not present;CancerHotspot: no;3DHotspot: no	SIFT: NA;Polyphen-2: NA	Frame_Shift_Del	DEL	Diploid	2	NA	NA	NA	2	234681161	234681161	A	-	2:g.234681161del	ENST00000305139.6:c.1560del							2470	2022-05-05					65	CCLE	NIBRI		ACH-000965				Caucasian	0.1162		0			Carcinoma	mixed_adenosquamous_carcinoma
Cancer Cell Line Encyclopedia (Broad, 2019)	1A1 E2-5	ISHIKAWAHERAKLIO02ER_ENDOMETRIUM	Endometrial Cancer	Endometrial Carcinoma	R522Efs*22	OncoKB: NA;CIViC: NA;MyCancerGenome: not present;CancerHotspot: no;3DHotspot: no	SIFT: NA;Polyphen-2: NA	Frame_Shift_Del	DEL	Diploid	2	NA	NA	NA	2	234681161	234681161	A	-	2:g.234681161del	ENST00000305139.6:c.1560del							2745	2022-05-05					39	CCLE			ACH-000961	well differentiated endometrial adenocarcinoma			Asian	0.1232		0			Carcinoma	adenocarcinoma
Cancer Cell Line Encyclopedia (Broad, 2019)	1A1 E2-5	SNU1040_LARGE_INTESTINE	Colorectal Cancer	Colorectal Adenocarcinoma	R522Efs*22	OncoKB: NA;CIViC: NA;MyCancerGenome: not present;CancerHotspot: no;3DHotspot: no	SIFT: NA;Polyphen-2: NA	Frame_Shift_Del	DEL	Diploid	2	NA	NA	NA	2	234681161	234681161	A	-	2:g.234681161del	ENST00000305139.6:c.1560del							19141	2022-05-05					34	CCLE	KCLB	epithelial; monolayer	ACH-000999			63 hrs	Asian	0.06		0		RPMI 1640 with L-glutamine (300mg/L), 90%; heat inactivated fetal bovine serum (FBS),10%	Carcinoma	NS
Cancer Cell Line Encyclopedia (Broad, 2019)	1A1 E2-5	HEC59_ENDOMETRIUM	Endometrial Cancer	Endometrial Carcinoma	R522Efs*22	OncoKB: NA;CIViC: NA;MyCancerGenome: not present;CancerHotspot: no;3DHotspot: no	SIFT: NA;Polyphen-2: NA	Frame_Shift_Del	DEL	Diploid	2	NA	NA	NA	2	234681161	234681161	A	-	2:g.234681161del	ENST00000305139.6:c.1560del							7277	2022-05-05						CCLE	HSSRB	epithelial-like	ACH-000994				Asian	0.2823		0	japan	Eagle's minimal essential medium with 15% fetal calf serum	Carcinoma	adenocarcinoma
Cancer Cell Line Encyclopedia (Broad, 2019)	1A1 E2-5	MOLT4_HAEMATOPOIETIC_AND_LYMPHOID_TISSUE	T-Lymphoblastic Leukemia/Lymphoma	T-Lymphoblastic Leukemia/Lymphoma	R522Efs*22	OncoKB: NA;CIViC: NA;MyCancerGenome: not present;CancerHotspot: no;3DHotspot: no	SIFT: NA;Polyphen-2: NA	Frame_Shift_Del	DEL	Diploid	2	NA	NA	NA	2	234681161	234681161	A	-	2:g.234681161del	ENST00000305139.6:c.1560del							4963	2022-05-05					19	CCLE			ACH-001127	leukaemia			Caucasian	0.3126		1			Lymphoid_Neoplasm	acute_lymphoblastic_T_cell_leukaemia
Cancer Cell Line Encyclopedia (Broad, 2019)	1A1 E2-5	MOLT3_HAEMATOPOIETIC_AND_LYMPHOID_TISSUE	T-Lymphoblastic Leukemia/Lymphoma	T-Lymphoblastic Leukemia/Lymphoma	R522Efs*22	OncoKB: NA;CIViC: NA;MyCancerGenome: not present;CancerHotspot: no;3DHotspot: no	SIFT: NA;Polyphen-2: NA	Frame_Shift_Del	DEL		2	NA	NA	NA	2	234681161	234681161	A	-	2:g.234681161del	ENST00000305139.6:c.1560del							1750	2022-05-05					19	COSMIC	PT-6ZZI	suspension	ACH-000964	leukaemia	50.9		Caucasian		5% DMSO			RPMI + 10 % FBS	Lymphoid_Neoplasm	acute_lymphoblastic_T_cell_leukaemia
Cancer Cell Line Encyclopedia (Broad, 2019)	1A1 E2-5	PACADD137_PANCREAS	Mixed Cancer Types	Mixed Cancer Types	C508Y	OncoKB: NA;CIViC: NA;MyCancerGenome: not present;CancerHotspot: no;3DHotspot: no	SIFT: impact: deleterious, score: 0.01;Polyphen-2: impact: probably_damaging, score: 0.964	Missense_Mutation	SNP			NA	NA	NA	2	234681129	234681129	G	A	2:g.234681129G>A	ENST00000305139.6:c.1523G>A							1413	2022-05-05
Cancer Cell Line Encyclopedia (Broad, 2019)	1A1 E2-5	DV90_LUNG	Non-Small Cell Lung Cancer	Non-Small Cell Lung Cancer	K401T	OncoKB: NA;CIViC: NA;MyCancerGenome: not present;CancerHotspot: no;3DHotspot: no	SIFT: impact: tolerated, score: 0.05;Polyphen-2: impact: probably_damaging, score: 0.986	Missense_Mutation	SNP	Diploid		NA	NA	NA	2	234676986	234676986	A	C	2:g.234676986A>C	ENST00000305139.6:c.1202A>C							1571	2022-05-04					50	CCLE	DSMZ	ADHERENT CELLS GROWING IN MONOLAYERS	ACH-000925	lung_cancer	43.6	95 hrs	Caucasian	0.0963	5% DMSO	0		RPMI-1640+10% FBS	Carcinoma	adenocarcinoma
Cancer Cell Line Encyclopedia (Broad, 2019)	1A1 E2-5	HEP3B217_LIVER	Hepatobiliary Cancer	Hepatocellular Carcinoma	I313V	OncoKB: NA;CIViC: NA;MyCancerGenome: not present;CancerHotspot: no;3DHotspot: no	SIFT: impact: deleterious, score: 0.03;Polyphen-2: impact: possibly_damaging, score: 0.829	Missense_Mutation	SNP	Diploid		NA	NA	NA	2	234675755	234675755	A	G	2:g.234675755A>G	ENST00000305139.6:c.937A>G							251	2022-05-02					8	CCLE		adherent	ACH-000625	hepatocellular_cancer			African_american	0.556	5%DMSO	1		EMEM+10%FBS	Carcinoma	hepatocellular_carcinoma
Cancer Cell Line Encyclopedia (Broad, 2019)	1A1 E2-5	NCIH1944_LUNG	Non-Small Cell Lung Cancer	Non-Small Cell Lung Cancer	A496S	OncoKB: NA;CIViC: NA;MyCancerGenome: not present;CancerHotspot: no;3DHotspot: no	SIFT: impact: deleterious, score: 0.03;Polyphen-2: impact: possibly_damaging, score: 0.702	Missense_Mutation	SNP	Diploid	1	NA	NA	NA	2	234681092	234681092	G	T	2:g.234681092G>T	ENST00000305139.6:c.1486G>T							467	2022-05-05					62	CCLE	ATCC	Adherent	ACH-000414		70.1		Caucasian	0.1886	5%DMSO	0		RPMI+10%FBS	Carcinoma	non_small_cell_carcinoma
Cancer Cell Line Encyclopedia (Broad, 2019)	1A1 E2-5	SNU175_LARGE_INTESTINE	Colorectal Cancer	Colorectal Adenocarcinoma	V461M	OncoKB: NA;CIViC: NA;MyCancerGenome: not present;CancerHotspot: no;3DHotspot: no	SIFT: impact: deleterious, score: 0;Polyphen-2: impact: probably_damaging, score: 0.998	Missense_Mutation	SNP	Diploid		NA	NA	NA	2	234680987	234680987	G	A	2:g.234680987G>A	ENST00000305139.6:c.1381G>A							5504	2022-05-05					56	CCLE	KCLB	lymphoblast-like, round; suspention	ACH-000989			33 hrs	Asian	0.0927		0		RPMI 1640 with L-glutamine (300mg/L), 90%; heat inactivated fetal bovine serum (FBS),10%	Carcinoma	NS
Cancer Cell Line Encyclopedia (Broad, 2019)	1A1 E2-5	SKMEL30_SKIN	Melanoma	Cutaneous Melanoma	K427N	OncoKB: NA;CIViC: NA;MyCancerGenome: not present;CancerHotspot: no;3DHotspot: no	SIFT: impact: tolerated, score: 0.42;Polyphen-2: impact: benign, score: 0.166	Missense_Mutation	SNP	Diploid		NA	NA	NA	2	234677065	234677065	A	C	2:g.234677065A>C	ENST00000305139.6:c.1281A>C							536	2022-05-04					67	CCLE	DSMZ	Adherent	ACH-000810		41.6		Caucasian	0.414	10%DMSO	1		RPMI-1640 + 10% FBS	Malignant_Melanoma	NS
Cancer Cell Line Encyclopedia (Broad, 2019)	1A1 E2-5	59M_OVARY	Ovarian Cancer	Ovarian Carcinosarcoma/Malignant Mixed Mesodermal Tumor	P391S	OncoKB: NA;CIViC: NA;MyCancerGenome: not present;CancerHotspot: no;3DHotspot: no	SIFT: impact: deleterious, score: 0;Polyphen-2: impact: probably_damaging, score: 1	Missense_Mutation	SNP			NA	NA	NA	2	234676955	234676955	C	T	2:g.234676955C>T	ENST00000305139.6:c.1171C>T							228	2022-05-04		Uncertain_significance				CCLE	ECACC		ACH-000520	ovarian_carcinoma			Caucasian	0.6144		1			Carcinoma	NS
Cancer Cell Line Encyclopedia (Broad, 2019)	1A1 E2-5	HCC1187_BREAST	Breast Cancer	Invasive Breast Carcinoma	S444I	OncoKB: NA;CIViC: NA;MyCancerGenome: not present;CancerHotspot: no;3DHotspot: no	SIFT: impact: deleterious, score: 0.03;Polyphen-2: impact: possibly_damaging, score: 0.774	Missense_Mutation	SNP	Diploid	2	NA	NA	NA	2	234680937	234680937	G	T	2:g.234680937G>T	ENST00000305139.6:c.1331G>T							212	2022-05-05					41	CCLE	ATCC	Epithelial; mixed adherent and suspension	ACH-000111	ductal_carcinoma	66		Caucasian	0.873	5%DMSO	0		RPMI-1640+10% FBS	Carcinoma	ductal_carcinoma
Cancer Cell Line Encyclopedia (Broad, 2019)	1A1 E2-5	CROAP2_HAEMATOPOIETIC_AND_LYMPHOID_TISSUE	Cancer of Unknown Primary	Cancer of Unknown Primary	M403T	OncoKB: NA;CIViC: NA;MyCancerGenome: not present;CancerHotspot: no;3DHotspot: no	SIFT: impact: deleterious, score: 0;Polyphen-2: impact: probably_damaging, score: 0.994	Missense_Mutation	SNP			NA	NA	NA	2	234676992	234676992	T	C	2:g.234676992T>C	ENST00000305139.6:c.1208T>C							407	2022-05-04									ACH-002220
Cancer Cell Line Encyclopedia (Broad, 2019)	1A1 E2-5	EN_ENDOMETRIUM	Endometrial Cancer	Endometrial Carcinoma	M440V	OncoKB: NA;CIViC: NA;MyCancerGenome: not present;CancerHotspot: no;3DHotspot: no	SIFT: impact: tolerated, score: 0.09;Polyphen-2: impact: benign, score: 0.062	Missense_Mutation	SNP	Diploid	1	NA	NA	NA	2	234680924	234680924	A	G	2:g.234680924A>G	ENST00000305139.6:c.1318A>G							5949	2022-05-05					50	CCLE	DSMZ	adherent epitheloid cells growing in monolayers	ACH-000978	Endometrial Cancer	93.9	50-80 hrs	Asian	0.2175	5% DMSO	0	japan	DMEM+20% FBS	Carcinoma	NS
Cancer Cell Line Encyclopedia (Broad, 2019)	1A1 E2-5	EN_ENDOMETRIUM	Endometrial Cancer	Endometrial Carcinoma	F459L	OncoKB: NA;CIViC: NA;MyCancerGenome: not present;CancerHotspot: no;3DHotspot: no	SIFT: impact: deleterious, score: 0.01;Polyphen-2: impact: probably_damaging, score: 0.99	Missense_Mutation	SNP	Diploid		NA	NA	NA	2	234680981	234680981	T	C	2:g.234680981T>C	ENST00000305139.6:c.1375T>C							5949	2022-05-05					50	CCLE	DSMZ	adherent epitheloid cells growing in monolayers	ACH-000978	Endometrial Cancer	93.9	50-80 hrs	Asian	0.2175	5% DMSO	0	japan	DMEM+20% FBS	Carcinoma	NS
Cancer Cell Line Encyclopedia (Broad, 2019)	1A1 E2-5	IGR1_SKIN	Melanoma	Cutaneous Melanoma	I349L	OncoKB: NA;CIViC: NA;MyCancerGenome: not present;CancerHotspot: no;3DHotspot: no	SIFT: impact: tolerated, score: 0.07;Polyphen-2: impact: benign, score: 0.411	Missense_Mutation	SNP	Diploid		NA	NA	NA	2	234676546	234676546	A	C	2:g.234676546A>C	ENST00000305139.6:c.1045A>C							1157	2022-05-03					42	CCLE		Epithelial adherent	ACH-000882		46.3		Caucasian	0.5209	5%DMSO	1		DMEM + 10% FBS	Malignant_Melanoma	NS
Cancer Cell Line Encyclopedia (Broad, 2019)	1A1 E2-5	JSC1_HAEMATOPOIETIC_AND_LYMPHOID_TISSUE	Cancer of Unknown Primary	Cancer of Unknown Primary	I321M	OncoKB: NA;CIViC: NA;MyCancerGenome: not present;CancerHotspot: no;3DHotspot: no	SIFT: impact: deleterious, score: 0;Polyphen-2: impact: probably_damaging, score: 0.999	Missense_Mutation	SNP		1	NA	NA	NA	2	234675781	234675781	T	G	2:g.234675781T>G	ENST00000305139.6:c.963T>G							713	2022-05-02									ACH-002253
Cancer Cell Line Encyclopedia (Broad, 2019)	1A1 E2-5	NCIH1573_LUNG	Non-Small Cell Lung Cancer	Non-Small Cell Lung Cancer	P453Q	OncoKB: NA;CIViC: NA;MyCancerGenome: not present;CancerHotspot: no;3DHotspot: no	SIFT: impact: deleterious, score: 0;Polyphen-2: impact: probably_damaging, score: 1	Missense_Mutation	SNP	Diploid		NA	NA	NA	2	234680964	234680964	C	A	2:g.234680964C>A	ENST00000305139.6:c.1358C>A							1567	2022-05-05					35	CCLE	ATCC	Adherent	ACH-000916		118.2		Caucasian	0.8552	5% DMSO	0		DMEM/F12(1:1) +10 % FBS	Carcinoma	adenocarcinoma
Cancer Cell Line Encyclopedia (Broad, 2019)	1A1 E2-5	NCIH250_LUNG	Cancer of Unknown Primary	Cancer of Unknown Primary	V498E	OncoKB: NA;CIViC: NA;MyCancerGenome: not present;CancerHotspot: no;3DHotspot: no	SIFT: impact: deleterious, score: 0;Polyphen-2: impact: possibly_damaging, score: 0.9	Missense_Mutation	SNP			NA	NA	NA	2	234681099	234681099	T	A	2:g.234681099T>A	ENST00000305139.6:c.1493T>A							698	2022-05-05									ACH-002171
Cancer Cell Line Encyclopedia (Broad, 2019)	1A1 E2-5	SNU1040_LARGE_INTESTINE	Colorectal Cancer	Colorectal Adenocarcinoma	A400T	OncoKB: NA;CIViC: NA;MyCancerGenome: not present;CancerHotspot: no;3DHotspot: no	SIFT: impact: deleterious, score: 0;Polyphen-2: impact: probably_damaging, score: 0.999	Missense_Mutation	SNP	Diploid		NA	NA	NA	2	234676982	234676982	G	A	2:g.234676982G>A	ENST00000305139.6:c.1198G>A							19141	2022-05-04					34	CCLE	KCLB	epithelial; monolayer	ACH-000999			63 hrs	Asian	0.06		0		RPMI 1640 with L-glutamine (300mg/L), 90%; heat inactivated fetal bovine serum (FBS),10%	Carcinoma	NS
Cancer Cell Line Encyclopedia (Broad, 2019)	1A1 E2-5	SW684_SOFT_TISSUE	Cancer of Unknown Primary	Cancer of Unknown Primary	R340Q	OncoKB: NA;CIViC: NA;MyCancerGenome: not present;CancerHotspot: no;3DHotspot: no	SIFT: impact: tolerated, score: 0.58;Polyphen-2: impact: benign, score: 0.223	Missense_Mutation	SNP			NA	NA	NA	2	234676520	234676520	G	A	2:g.234676520G>A	ENST00000305139.6:c.1019G>A							4350	2022-05-03									ACH-002309
Cancer Cell Line Encyclopedia (Broad, 2019)	1A1 E2-5	JHUEM7_ENDOMETRIUM	Endometrial Cancer	Endometrial Carcinoma	D358Y	OncoKB: NA;CIViC: NA;MyCancerGenome: not present;CancerHotspot: no;3DHotspot: no	SIFT: impact: deleterious, score: 0;Polyphen-2: impact: probably_damaging, score: 0.999	Missense_Mutation	SNP	Diploid		NA	NA	NA	2	234676573	234676573	G	T	2:g.234676573G>T	ENST00000305139.6:c.1072G>T							6962	2022-05-03					58	CCLE	GNF		ACH-000993		112.7		Asian	0.0332		0	japan		Carcinoma	adenocarcinoma
Cancer Cell Line Encyclopedia (Broad, 2019)	1A1 E2-5	LUDLU1_LUNG	Non-Small Cell Lung Cancer	Non-Small Cell Lung Cancer	V501Sfs*7	OncoKB: NA;CIViC: NA;MyCancerGenome: not present;CancerHotspot: no;3DHotspot: no	SIFT: NA;Polyphen-2: NA	Frame_Shift_Ins	INS	Diploid		NA	NA	NA	2	234681105	234681106	-	A	2:g.234681105_234681106insA	ENST00000305139.6:c.1500dup							235	2022-05-05					72	CCLE	ECAAC	epithelial, adherent	ACH-000390		120.7		Caucasian	0.773	5% DMSO	0		RPMI-1640+10% FBS	Carcinoma	squamous_cell_carcinoma
Multiple mutation in a single cell line
CCLEs with UGT mutations
22
59M_OVARY
CROAP2_HAEMATOPOIETIC_AND_LYMPHOID_TISSUE
DV90_LUNG
EN_ENDOMETRIUM
HCC1187_BREAST
HEC59_ENDOMETRIUM
HEP3B217_LIVER
IGR1_SKIN
ISHIKAWAHERAKLIO02ER_ENDOMETRIUM
JHUEM7_ENDOMETRIUM
JSC1_HAEMATOPOIETIC_AND_LYMPHOID_TISSUE
LUDLU1_LUNG
MOLT3_HAEMATOPOIETIC_AND_LYMPHOID_TISSUE
MOLT4_HAEMATOPOIETIC_AND_LYMPHOID_TISSUE
NCIH1573_LUNG
NCIH1944_LUNG
NCIH250_LUNG
PACADD137_PANCREAS
RL952_ENDOMETRIUM
SKMEL30_SKIN
SNU175_LARGE_INTESTINE
SW684_SOFT_TISSUE
[truncated: 24 more columns]

## Sheet: UGT1A1
Study of Origin	UGT gene	Sample ID	Cancer Type	Cancer Type Detailed	Protein Change	Annotation	Functional Impact	Mutation Type	Variant Type	Copy #	COSMIC	MS	VS	Center	Chromosome	Start Pos	End Pos	Ref	Var	HGVSg	HGVSc	Allele Freq (T)	Allele Freq (N)	Variant Reads	Ref Reads	Variant Reads (Normal)	Ref Reads (Normal)	# Mut in Sample	Exon	gnomAD	ClinVar	dbSNP	SIGNAL	Age	Annotation Source	Cell Line Source	Characteristics	DepMap ID	Disease Ontology	Doubling Time (hrs)	Doubling Time From Vendor	Ethnicity Category	Fraction Genome Altered	Freezing Medium	Genome Doublings	Geographic Distribution	Growth Medium	Histology	Hist Subtype 1
Cancer Cell Line Encyclopedia (Broad, 2019)	1A1	EW8_BONE	Bone Cancer	Ewing SarcomaÃƒ_	D103Y	OncoKB: NA;CIViC: NA;MyCancerGenome: not present;CancerHotspot: no;3DHotspot: no	SIFT: NA;Polyphen-2: NA	Missense_Mutation	SNP	Diploid	1	NA	NA	NA	2	234669240	234669240	G	T	2:g.234669240G>T	ENST00000305208.5:c.307G>T							233	2022-05-01						ACHILLES			ACH-000499				Caucasian	0.4229		1			Ewings_Sarcoma-Peripheral_Primitive_Neuroectodermal_Tumour	NS
Cancer Cell Line Encyclopedia (Broad, 2019)	1A1	RH1_SOFT_TISSUE	Cancer of Unknown Primary	Cancer of Unknown Primary	D103Y	OncoKB: NA;CIViC: NA;MyCancerGenome: not present;CancerHotspot: no;3DHotspot: no	SIFT: NA;Polyphen-2: NA	Missense_Mutation	SNP		1	NA	NA	NA	2	234669240	234669240	G	T	2:g.234669240G>T	ENST00000305208.5:c.307G>T							220	2022-05-01									ACH-002194
Cancer Cell Line Encyclopedia (Broad, 2019)	1A1	SNU1272_KIDNEY	Renal Cell Carcinoma	Renal Clear Cell Carcinoma	G8R	OncoKB: NA;CIViC: NA;MyCancerGenome: not present;CancerHotspot: no;3DHotspot: no	SIFT: NA;Polyphen-2: NA	Missense_Mutation	SNP	Diploid		NA	NA	NA	2	234668955	234668955	G	A	2:g.234668955G>A	ENST00000305208.5:c.22G>A							239	2022-05-01	7.97556e-06	Uncertain_significance	rs749552053		63	CCLE	KCLB	epithelial; monolayer	ACH-000513			153 hrs	Asian	0.251		0		RPMI 1640 with L-glutamine (300mg/L), 90%; heat inactivated fetal bovine serum (FBS),10%	Carcinoma	clear_cell_renal_cell_carcinoma
Cancer Cell Line Encyclopedia (Broad, 2019)	1A1	LS180_LARGE_INTESTINE	Colorectal Cancer	Colorectal Adenocarcinoma	V226I	OncoKB: NA;CIViC: NA;MyCancerGenome: not present;CancerHotspot: no;3DHotspot: no	SIFT: NA;Polyphen-2: NA	Missense_Mutation	SNP	Diploid		NA	NA	NA	2	234669609	234669609	G	A	2:g.234669609G>A	ENST00000305208.5:c.676G>A							2262	2022-05-01	7.95412e-06		rs761943511		58	CCLE			ACH-000957	colon_cancer			Caucasian	0.026		0			Carcinoma	adenocarcinoma
Cancer Cell Line Encyclopedia (Broad, 2019)	1A1	CTV1_HAEMATOPOIETIC_AND_LYMPHOID_TISSUE	Cancer of Unknown Primary	Cancer of Unknown Primary	G96R	OncoKB: NA;CIViC: NA;MyCancerGenome: not present;CancerHotspot: no;3DHotspot: no	SIFT: NA;Polyphen-2: NA	Missense_Mutation	SNP		1	NA	NA	NA	2	234669219	234669219	G	A	2:g.234669219G>A	ENST00000305208.5:c.286G>A							3765	2022-05-01	7.07334e-06		rs1208621089						ACH-002222
Cancer Cell Line Encyclopedia (Broad, 2019)	1A1	MEWO_SKIN	Melanoma	Cutaneous Melanoma	L238F	OncoKB: NA;CIViC: NA;MyCancerGenome: not present;CancerHotspot: no;3DHotspot: no	SIFT: NA;Polyphen-2: NA	Missense_Mutation	SNP	Diploid		NA	NA	NA	2	234669645	234669645	C	T	2:g.234669645C>T	ENST00000305208.5:c.712C>T							4898	2022-05-01					78	CCLE	GNF		ACH-000987				Caucasian	0.1645		0			Malignant_Melanoma	NS
Cancer Cell Line Encyclopedia (Broad, 2019)	1A1	HEC108_ENDOMETRIUM	Endometrial Cancer	Endometrial Carcinoma	M213I	OncoKB: NA;CIViC: NA;MyCancerGenome: not present;CancerHotspot: no;3DHotspot: no	SIFT: NA;Polyphen-2: NA	Missense_Mutation	SNP	Diploid		NA	NA	NA	2	234669572	234669572	G	A	2:g.234669572G>A	ENST00000305208.5:c.639G>A							9823	2022-05-01						CCLE	HSSRB		ACH-000990		63		Asian	0.3879		0			Carcinoma	adenocarcinoma
Cancer Cell Line Encyclopedia (Broad, 2019)	1A1	HS675T_FIBROBLAST	Colorectal Cancer	Colorectal Adenocarcinoma	D103V	OncoKB: NA;CIViC: NA;MyCancerGenome: not present;CancerHotspot: no;3DHotspot: no	SIFT: NA;Polyphen-2: NA	Missense_Mutation	SNP		1	NA	NA	NA	2	234669241	234669241	A	T	2:g.234669241A>T	ENST00000305208.5:c.308A>T							126	2022-05-01						CCLE	NIBRI		ACH-000214				Caucasian			0			Carcinoma	NS
Cancer Cell Line Encyclopedia (Broad, 2019)	1A1	NCIH211_LUNG	Small Cell Lung Cancer	Small Cell Lung Cancer	F170Y	OncoKB: NA;CIViC: NA;MyCancerGenome: not present;CancerHotspot: no;3DHotspot: no	SIFT: NA;Polyphen-2: NA	Missense_Mutation	SNP	Diploid		NA	NA	NA	2	234669442	234669442	T	A	2:g.234669442T>A	ENST00000305208.5:c.509T>A							436	2022-05-01					50	CCLE	ATCC	Suspension	ACH-000639		176		Caucasian	0.6746	5% DMSO	0		RPMI-1640+10%FBS	Carcinoma	small_cell_carcinoma
Cancer Cell Line Encyclopedia (Broad, 2019)	1A1	CAL72_BONE	Cancer of Unknown Primary	Cancer of Unknown Primary	H55Y	OncoKB: NA;CIViC: NA;MyCancerGenome: not present;CancerHotspot: no;3DHotspot: no	SIFT: NA;Polyphen-2: NA	Missense_Mutation	SNP			NA	NA	NA	2	234669096	234669096	C	T	2:g.234669096C>T	ENST00000305208.5:c.163C>T							295	2022-05-01	3.18512e-05		rs1218272105						ACH-001715
Cancer Cell Line Encyclopedia (Broad, 2019)	1A1	LB2518MEL_SKIN	Cancer of Unknown Primary	Cancer of Unknown Primary	N220S	OncoKB: NA;CIViC: NA;MyCancerGenome: not present;CancerHotspot: no;3DHotspot: no	SIFT: NA;Polyphen-2: NA	Missense_Mutation	SNP			NA	NA	NA	2	234669592	234669592	A	G	2:g.234669592A>G	ENST00000305208.5:c.659A>G							381	2022-05-01									ACH-002152
Cancer Cell Line Encyclopedia (Broad, 2019)	1A1	RCCJW_KIDNEY	Cancer of Unknown Primary	Cancer of Unknown Primary	E56A	OncoKB: NA;CIViC: NA;MyCancerGenome: not present;CancerHotspot: no;3DHotspot: no	SIFT: NA;Polyphen-2: NA	Missense_Mutation	SNP			NA	NA	NA	2	234669100	234669100	A	C	2:g.234669100A>C	ENST00000305208.5:c.167A>C							161	2022-05-01	4.59689e-05	Uncertain_significance	rs140365717						ACH-002191
Cancer Cell Line Encyclopedia (Broad, 2019)	1A1	SNU1040_LARGE_INTESTINE	Colorectal Cancer	Colorectal Adenocarcinoma	G28R	OncoKB: NA;CIViC: NA;MyCancerGenome: not present;CancerHotspot: no;3DHotspot: no	SIFT: NA;Polyphen-2: NA	Missense_Mutation	SNP	Diploid		NA	NA	NA	2	234669015	234669015	G	A	2:g.234669015G>A	ENST00000305208.5:c.82G>A							19141	2022-05-01					34	CCLE	KCLB	epithelial; monolayer	ACH-000999			63 hrs	Asian	0.06		0		RPMI 1640 with L-glutamine (300mg/L), 90%; heat inactivated fetal bovine serum (FBS),10%	Carcinoma	NS
Cancer Cell Line Encyclopedia (Broad, 2019)	1A1	TE4_OESOPHAGUS	Esophagogastric Cancer	Esophageal Adenocarcinoma	G28V	OncoKB: NA;CIViC: NA;MyCancerGenome: not present;CancerHotspot: no;3DHotspot: no	SIFT: NA;Polyphen-2: NA	Missense_Mutation	SNP	Diploid		NA	NA	NA	2	234669016	234669016	G	T	2:g.234669016G>T	ENST00000305208.5:c.83G>T							1074	2022-05-01						CCLE	RIKEN	epithelial-like	ACH-000917				Asian	0.6735		1		RPMI 1640 +10%FBS	Carcinoma	squamous_cell_carcinoma
Cancer Cell Line Encyclopedia (Broad, 2019)	1A1	NCIH211_LUNG	Small Cell Lung Cancer	Small Cell Lung Cancer	F170Y	OncoKB: NA;CIViC: NA;MyCancerGenome: not present;CancerHotspot: no;3DHotspot: no	SIFT: NA;Polyphen-2: NA	Missense_Mutation	DNP	Diploid		NA	NA	NA	2	234669442	234669443	TC	AT	2:g.234669442_234669443delinsAT	ENST00000305208.5:c.509_510delinsAT							436	2022-05-01					50	CCLE	ATCC	Suspension	ACH-000639		176		Caucasian	0.6746	5% DMSO	0		RPMI-1640+10%FBS	Carcinoma	small_cell_carcinoma
NM_000463 | ENST00000305208
CCDS2510 | UD11_HUMAN
Somatic Mutation Frequency0.9%
CCLEs with UGT mutations
14
CAL72_BONE
CTV1_HAEMATOPOIETIC_AND_LYMPHOID_TISSUE
EW8_BONE
HEC108_ENDOMETRIUM
HS675T_FIBROBLAST
LB2518MEL_SKIN
LS180_LARGE_INTESTINE
MEWO_SKIN
NCIH211_LUNG
RCCJW_KIDNEY
RH1_SOFT_TISSUE
SNU1040_LARGE_INTESTINE
SNU1272_KIDNEY
TE4_OESOPHAGUS
[truncated: 24 more columns]

## Sheet: UGT1A3
Study of Origin	UGT gene	Sample ID	Cancer Type	Cancer Type Detailed	Protein Change	Annotation	Functional Impact	Mutation Type	Variant Type	Copy #	COSMIC	MS	VS	Center	Chromosome	Start Pos	End Pos	Ref	Var	HGVSg	HGVSc	Allele Freq (T)	Allele Freq (N)	Variant Reads	Ref Reads	Variant Reads (Normal)	Ref Reads (Normal)	# Mut in Sample	Exon	gnomAD	ClinVar	dbSNP	SIGNAL	Age	Annotation Source	Cell Line Source	Characteristics	DepMap ID	Disease Ontology	Doubling Time (hrs)	Doubling Time From Vendor	Ethnicity Category	Fraction Genome Altered	Freezing Medium	Genome Doublings	Geographic Distribution	Growth Medium	Histology	Hist Subtype 1
Cancer Cell Line Encyclopedia (Broad, 2019)	1A3	SNUC5_LARGE_INTESTINE	Colorectal Cancer	Colorectal Adenocarcinoma	L173*	OncoKB: NA;CIViC: NA;MyCancerGenome: not present;CancerHotspot: no;3DHotspot: no	SIFT: NA;Polyphen-2: NA	Frame_Shift_Del	DEL	Diploid	5	NA	NA	NA	2	234638283	234638283	T	-	2:g.234638283del	ENST00000482026.1:c.518del							2990	2022-05-01					77	CCLE	KCLB	epithelial; monolayer	ACH-000970			67 hrs	Asian	0.0966		0		RPMI 1640 with L-glutamine (300mg/L), 90%; heat inactivated fetal bovine serum (FBS),10%	Carcinoma	adenocarcinoma
Cancer Cell Line Encyclopedia (Broad, 2019)	1A3	MFE319_ENDOMETRIUM	Endometrial Cancer	Endometrial Carcinoma	L173*	OncoKB: NA;CIViC: NA;MyCancerGenome: not present;CancerHotspot: no;3DHotspot: no	SIFT: NA;Polyphen-2: NA	Frame_Shift_Del	DEL	Diploid	5	NA	NA	NA	2	234638283	234638283	T	-	2:g.234638283del	ENST00000482026.1:c.518del							4842	2022-05-01					81	CCLE	NIBRI		ACH-000988	Endometrial Cancer			Caucasian	0.0263		0			Carcinoma	adenocarcinoma
Cancer Cell Line Encyclopedia (Broad, 2019)	1A3	GP2D_LARGE_INTESTINE	Colorectal Cancer	Colorectal Adenocarcinoma	L173*	OncoKB: NA;CIViC: NA;MyCancerGenome: not present;CancerHotspot: no;3DHotspot: no	SIFT: NA;Polyphen-2: NA	Frame_Shift_Del	DEL	Diploid	5	NA	NA	NA	2	234638283	234638283	T	-	2:g.234638283del	ENST00000482026.1:c.518del							5043	2022-05-01					71	CCLE	ECACC	Epithelial adherent	ACH-000982		77.1		Caucasian	0.0418	?	0		DMEM+10%FBS	Carcinoma	adenocarcinoma
Cancer Cell Line Encyclopedia (Broad, 2019)	1A3	CMLT1_HAEMATOPOIETIC_AND_LYMPHOID_TISSUE	Blood Cancer	Chronic Myelogenous Leukemia	L173*	OncoKB: NA;CIViC: NA;MyCancerGenome: not present;CancerHotspot: no;3DHotspot: no	SIFT: NA;Polyphen-2: NA	Frame_Shift_Del	DEL	Diploid	5	NA	NA	NA	2	234638283	234638283	T	-	2:g.234638283del	ENST00000482026.1:c.518del							2486	2022-05-01					36	CCLE	DSMZ	single, round cells insuspension	ACH-000920			~ 48-60 hrs	Asian	0.0424		0		90 % Iscove's MDMD or RPMI 1640 + 10% h.i. FBS	Haematopoietic_Neoplasm	blast_phase_chronic_myeloid_leukaemia
Cancer Cell Line Encyclopedia (Broad, 2019)	1A3	GP5D_LARGE_INTESTINE	Cancer of Unknown Primary	Cancer of Unknown Primary	L173*	OncoKB: NA;CIViC: NA;MyCancerGenome: not present;CancerHotspot: no;3DHotspot: no	SIFT: NA;Polyphen-2: NA	Frame_Shift_Del	DEL		5	NA	NA	NA	2	234638283	234638283	T	-	2:g.234638283del	ENST00000482026.1:c.518del							4941	2022-05-01									ACH-001345
Cancer Cell Line Encyclopedia (Broad, 2019)	1A3	DG75_HAEMATOPOIETIC_AND_LYMPHOID_TISSUE	Cancer of Unknown Primary	Cancer of Unknown Primary	L173*	OncoKB: NA;CIViC: NA;MyCancerGenome: not present;CancerHotspot: no;3DHotspot: no	SIFT: NA;Polyphen-2: NA	Frame_Shift_Del	DEL		5	NA	NA	NA	2	234638283	234638283	T	-	2:g.234638283del	ENST00000482026.1:c.518del							1535	2022-05-01									ACH-002232
Cancer Cell Line Encyclopedia (Broad, 2019)	1A3	OC314_OVARY	Ovarian Cancer	Ovarian Carcinosarcoma/Malignant Mixed Mesodermal Tumor	L173Ffs*2	OncoKB: NA;CIViC: NA;MyCancerGenome: not present;CancerHotspot: no;3DHotspot: no	SIFT: NA;Polyphen-2: NA	Frame_Shift_Ins	INS	Diploid	5	NA	NA	NA	2	234638282	234638283	-	TT	2:g.234638282_234638283insTT	ENST00000482026.1:c.517_518dup							2513	2022-05-01					39	CCLE	ICLC	Epithelial-like grown in monolayer	ACH-000962		41.8		Caucasian	0.2585	5	1		RPMI+10%FBS	Carcinoma	serous_carcinoma
Cancer Cell Line Encyclopedia (Broad, 2019)	1A3	LIM1215_LARGE_INTESTINE	Cancer of Unknown Primary	Cancer of Unknown Primary	L173Ffs*2	OncoKB: NA;CIViC: NA;MyCancerGenome: not present;CancerHotspot: no;3DHotspot: no	SIFT: NA;Polyphen-2: NA	Frame_Shift_Ins	INS		5	NA	NA	NA	2	234638282	234638283	-	TT	2:g.234638282_234638283insTT	ENST00000482026.1:c.517_518dup							907	2022-05-01									ACH-001546
Cancer Cell Line Encyclopedia (Broad, 2019)	1A3	MEL202_EYE	Cancer of Unknown Primary	Cancer of Unknown Primary	C281Y	OncoKB: NA;CIViC: NA;MyCancerGenome: not present;CancerHotspot: no;3DHotspot: no	SIFT: NA;Polyphen-2: NA	Missense_Mutation	SNP		1	NA	NA	NA	2	234638614	234638614	G	A	2:g.234638614G>A	ENST00000482026.1:c.842G>A							124	2022-05-01									ACH-001554
[truncated: 34 more rows]
[truncated: 24 more columns]

## Sheet: UGT1A4
Study of Origin	UGT gene	Sample ID	Cancer Type	Cancer Type Detailed	Protein Change	Annotation	Functional Impact	Mutation Type	Variant Type	Copy #	COSMIC	MS	VS	Center	Chromosome	Start Pos	End Pos	Ref	Var	HGVSg	HGVSc	Allele Freq (T)	Allele Freq (N)	Variant Reads	Ref Reads	Variant Reads (Normal)	Ref Reads (Normal)	# Mut in Sample	Exon	gnomAD	ClinVar	dbSNP	SIGNAL	Age	Annotation Source	Cell Line Source	Characteristics	DepMap ID	Disease Ontology	Doubling Time (hrs)	Doubling Time From Vendor	Ethnicity Category	Fraction Genome Altered	Freezing Medium	Genome Doublings	Geographic Distribution	Growth Medium	Histology	Hist Subtype 1
[truncated: 67 more rows]
[truncated: 24 more columns]

[truncated: 20 more sheets: UGT1A5, UGT1A6, UGT1A7, UGT1A8, UGT1A9, UGT1A10, UGT2A1, UGT2A2, UGT2A E2-6, UGT2A3, UGT2B4, UGT2B7, UGT2B10, UGT2B11, UGT2B15, UGT2B17, UGT2B28, UGT3A1, UGT3A2, UGT8]
