# Supplementary material for: The Somatic Mutation Landscape of UDP-Glycosyltransferase (UGT) Genes in Human Cancers
Source: Cancers (Basel). 2022 Nov 21;14(22):5708. doi: 10.3390/cancers14225708 (PMC9688768; doi:10.3390/cancers14225708)
Supplement: Supplementary file 1 [file cancers-14-05708-s001.zip › Table S9.xlsx]

## Sheet: Title
Table S9: Assessment of associations of UGT mutations with clinicopathological parameters in the LUAD cohort

## Sheet: 412 UGT mutations in LUAD
412 mutations in UGT genes in the TCGA LUAD cohort
Tumor_Sample_Barcode	Hugo_Symbol	Entrez_Gene_Id	Center	NCBI_Build	Chromosome	Start_Position	End_Position	Strand	Variant_Classification	Variant_Type	Reference_Allele	Tumor_Seq_Allele1	Tumor_Seq_Allele2	dbSNP_RS	dbSNP_Val_Status	TCGA Cancer type		Tumor_Sample_Barcode	Matched_Norm_Sample_Barcode	Match_Norm_Seq_Allele1	Match_Norm_Seq_Allele2	Tumor_Validation_Allele1	Tumor_Validation_Allele2	Match_Norm_Validation_Allele1	Match_Norm_Validation_Allele2	Verification_Status	Validation_Status	Mutation_Status	Sequencing_Phase	Sequence_Source	Validation_Method	Score	BAM_File	Sequencer	Tumor_Sample_UUID	Matched_Norm_Sample_UUID	HGVSc	HGVSp	HGVSp_Short	Transcript_ID	Exon_Number	t_depth	t_ref_count	t_alt_count	n_depth	n_ref_count	n_alt_count	all_effects	Allele
TCGA-05-4244-01A-01D-1105-08	UGT2B4	0	.	GRCh37	4	70361226	70361226	+	Silent	SNP	T	T	A	.	.	LUAD		TCGA-05-4244-01A-01D-1105-08	TCGA-05-4244-10A-01D-1105-08	T	T	.	.	.	.	.	.	.	.	.	.	.	.	.	.	.	c.354A>T	p.%3D	p.T118T	ENST00000305107	1/6	14	11	3	25	25	0	UGT2B4,synonymous_variant,p.%3D,ENST00000305107,;UGT2B4,synonymous_variant,p.%3D,ENST00000512583,;UGT2B4,intron_variant,,ENST00000381096,;UGT2B4,downstream_gene_variant,,ENST00000510114,;UGT2B4,non_coding_transcript_exon_variant,,ENST00000506580,;UGT2B4,intron_variant,,ENST00000503836,;UGT2B4,intron_variant,,ENST00000502655,;	A
TCGA-05-4382-01A-01D-1931-08	UGT2A1	0	.	GRCh37	4	70513224	70513224	+	Nonsense_Mutation	SNP	C	C	A	novel	.	LUAD		TCGA-05-4382-01A-01D-1931-08	TCGA-05-4382-10A-01D-1265-08	C	C	.	.	.	.	.	.	.	.	.	.	.	.	.	.	.	c.139G>T	p.Glu47Ter	p.E47*	ENST00000514019	2/7	107	91	16	73	73	0	UGT2A1,stop_gained,p.Glu47Ter,ENST00000505512,;UGT2A1,stop_gained,p.Glu47Ter,ENST00000286604,;UGT2A1,stop_gained,p.Glu47Ter,ENST00000514019,;UGT2A1,stop_gained,p.Glu47Ter,ENST00000512704,;UGT2A1,stop_gained,p.Glu47Ter,ENST00000503640,;	A
TCGA-05-4382-01A-01D-1931-08	UGT2A1	0	.	GRCh37	4	70513225	70513225	+	Missense_Mutation	SNP	C	C	A	novel	.	LUAD		TCGA-05-4382-01A-01D-1931-08	TCGA-05-4382-10A-01D-1265-08	C	C	.	.	.	.	.	.	.	.	.	.	.	.	.	.	.	c.138G>T	p.Lys46Asn	p.K46N	ENST00000514019	2/7	109	93	16	74	74	0	UGT2A1,missense_variant,p.Lys46Asn,ENST00000505512,;UGT2A1,missense_variant,p.Lys46Asn,ENST00000286604,;UGT2A1,missense_variant,p.Lys46Asn,ENST00000514019,;UGT2A1,missense_variant,p.Lys46Asn,ENST00000512704,;UGT2A1,missense_variant,p.Lys46Asn,ENST00000503640,;	A
TCGA-05-4382-01A-01D-1931-08	UGT2B10	0	.	GRCh37	4	69693259	69693259	+	Missense_Mutation	SNP	G	G	T	.	.	LUAD		TCGA-05-4382-01A-01D-1931-08	TCGA-05-4382-10A-01D-1265-08	G	G	.	.	.	.	.	.	.	.	.	.	.	.	.	.	.	c.1300G>T	p.Asp434Tyr	p.D434Y	ENST00000265403	5/6	237	215	22	174	174	0	UGT2B10,missense_variant,p.Asp434Tyr,ENST00000265403,;UGT2B10,missense_variant,p.Asp350Tyr,ENST00000458688,;	T
TCGA-05-4382-01A-01D-1931-08	UGT2B7	0	.	GRCh37	4	69962824	69962824	+	Missense_Mutation	SNP	G	G	A	rs757999533	.	LUAD		TCGA-05-4382-01A-01D-1931-08	TCGA-05-4382-10A-01D-1265-08	G	G	.	.	.	.	.	.	.	.	.	.	.	.	.	.	.	c.586G>A	p.Val196Ile	p.V196I	ENST00000305231	1/6	190	171	19	88	88	0	UGT2B7,missense_variant,p.Val196Ile,ENST00000305231,;UGT2B7,missense_variant,p.Val196Ile,ENST00000508661,;UGT2B7,intron_variant,,ENST00000502942,;UGT2B7,intron_variant,,ENST00000509763,;	A
TCGA-05-4390-01A-02D-1753-08	UGT2B15	0	.	GRCh37	4	69513061	69513061	+	Missense_Mutation	SNP	C	C	T	.	.	LUAD		TCGA-05-4390-01A-02D-1753-08	TCGA-05-4390-10A-01D-1753-08	C	C	.	.	.	.	.	.	.	.	.	.	.	.	.	.	.	c.1354G>A	p.Asp452Asn	p.D452N	ENST00000338206	6/6	158	123	35	134	134	0	UGT2B15,missense_variant,p.Asp452Asn,ENST00000338206,;	T
TCGA-05-4390-01A-02D-1753-08	UGT3A2	0	.	GRCh37	5	36038112	36038112	+	Missense_Mutation	SNP	G	G	T	.	.	LUAD		TCGA-05-4390-01A-02D-1753-08	TCGA-05-4390-10A-01D-1753-08	G	G	.	.	.	.	.	.	.	.	.	.	.	.	.	.	.	c.1082C>A	p.Pro361Gln	p.P361Q	ENST00000282507	6/7	68	55	12	60	60	0	UGT3A2,missense_variant,p.Pro327Gln,ENST00000513300,;UGT3A2,missense_variant,p.Pro59Gln,ENST00000545528,;UGT3A2,missense_variant,p.Pro361Gln,ENST00000282507,;UGT3A2,downstream_gene_variant,,ENST00000504954,;UGT3A2,3_prime_UTR_variant,,ENST00000504685,;	T
TCGA-05-4395-01A-01D-1265-08	UGT3A1	0	.	GRCh37	5	35955676	35955676	+	Intron	SNP	C	C	A	rs745552698	.	LUAD		TCGA-05-4395-01A-01D-1265-08	TCGA-05-4395-10A-01D-1265-08	C	C	.	.	.	.	.	.	.	.	.	.	.	.	.	.	.	c.1295+71G>T	.	.	ENST00000274278	.	36	16	20	23	23	0	UGT3A1,3_prime_UTR_variant,,ENST00000507113,;UGT3A1,3_prime_UTR_variant,,ENST00000503189,;UGT3A1,intron_variant,,ENST00000274278,;UGT3A1,downstream_gene_variant,,ENST00000513233,;UGT3A1,3_prime_UTR_variant,,ENST00000515801,;	A
TCGA-05-4397-01A-01D-1265-08	UGT2B17	0	.	GRCh37	4	69417582	69417582	+	Missense_Mutation	SNP	A	A	T	novel	.	LUAD		TCGA-05-4397-01A-01D-1265-08	TCGA-05-4397-10A-01D-1265-08	A	A	.	.	.	.	.	.	.	.	.	.	.	.	.	.	.	c.1053T>A	p.Asn351Lys	p.N351K	ENST00000317746	4/6	25	6	18	68	68	0	UGT2B17,missense_variant,p.Asn351Lys,ENST00000317746,;	T
TCGA-05-4398-01A-01D-1265-08	UGT1A4	0	.	GRCh37	2	234627526	234627526	+	Silent	SNP	C	C	T	.	.	LUAD		TCGA-05-4398-01A-01D-1265-08	TCGA-05-4398-10A-01D-1265-08	C	C	.	.	.	.	.	.	.	.	.	.	.	.	.	.	.	c.60C>T	p.%3D	p.L20L	ENST00000373409	1/5	52	44	8	71	71	0	UGT1A4,synonymous_variant,p.%3D,ENST00000373409,;UGT1A10,intron_variant,,ENST00000373445,;UGT1A6,intron_variant,,ENST00000305139,;UGT1A6,intron_variant,,ENST00000373424,;UGT1A8,intron_variant,,ENST00000608381,;UGT1A7,intron_variant,,ENST00000373426,;UGT1A8,intron_variant,,ENST00000609637,;UGT1A5,intron_variant,,ENST00000373414,;UGT1A6,intron_variant,,ENST00000406651,;UGT1A10,intron_variant,,ENST0…	T
TCGA-05-4405-01A-21D-1855-08	UGT1A8	0	.	GRCh37	2	234526902	234526902	+	Silent	SNP	C	C	T	.	.	LUAD		TCGA-05-4405-01A-21D-1855-08	TCGA-05-4405-10A-01D-1855-08	C	C	.	.	.	.	.	.	.	.	.	.	.	.	.	.	.	c.549C>T	p.%3D	p.C183C	ENST00000373450	1/5	410	371	39	330	329	1	UGT1A8,synonymous_variant,p.%3D,ENST00000373450,;	T
TCGA-05-4405-01A-21D-1855-08	UGT1A9	0	.	GRCh37	2	234581299	234581299	+	Missense_Mutation	SNP	C	C	G	rs561534651	.	LUAD		TCGA-05-4405-01A-21D-1855-08	TCGA-05-4405-10A-01D-1855-08	C	C	.	.	.	.	.	.	.	.	.	.	.	.	.	.	.	c.719C>G	p.Thr240Arg	p.T240R	ENST00000354728	1/5	597	329	267	493	493	0	UGT1A8,missense_variant,p.Thr240Arg,ENST00000609637,;UGT1A9,missense_variant,p.Thr240Arg,ENST00000354728,;UGT1A10,intron_variant,,ENST00000373445,;UGT1A10,intron_variant,,ENST00000344644,;UGT1A8,intron_variant,,ENST00000373450,;	G
TCGA-05-4410-01A-21D-1855-08	UGT2A1	0	.	GRCh37	4	70465104	70465104	+	Missense_Mutation	SNP	T	T	C	rs767311039	.	LUAD		TCGA-05-4410-01A-21D-1855-08	TCGA-05-4410-10A-01D-1855-08	T	T	.	.	.	.	.	.	.	.	.	.	.	.	.	.	.	c.1354A>G	p.Thr452Ala	p.T452A	ENST00000514019	4/7	82	69	13	88	88	0	UGT2A1,missense_variant,p.Thr286Ala,ENST00000286604,;UGT2A1,missense_variant,p.Thr452Ala,ENST00000514019,;UGT2A1,missense_variant,p.Thr242Ala,ENST00000503640,;UGT2A2,missense_variant,p.Thr252Ala,ENST00000604021,;UGT2A2,missense_variant,p.Thr251Ala,ENST00000457664,;UGT2A1,missense_variant,p.Thr242Ala,ENST00000512704,;UGT2A2,missense_variant,p.Thr252Ala,ENST00000604629,;UGT2A1,non_coding_transcript…	C
TCGA-05-4410-01A-21D-1855-08	UGT2B28	0	.	GRCh37	4	70156342	70156342	+	Missense_Mutation	SNP	G	G	T	.	.	LUAD		TCGA-05-4410-01A-21D-1855-08	TCGA-05-4410-10A-01D-1855-08	G	G	.	.	.	.	.	.	.	.	.	.	.	.	.	.	.	c.1123G>T	p.Gly375Cys	p.G375C	ENST00000335568	5/6	203	157	46	200	200	0	UGT2B28,missense_variant,p.Gly375Cys,ENST00000335568,;UGT2B28,intron_variant,,ENST00000511240,;	T
TCGA-05-4410-01A-21D-1855-08	UGT2B4	0	.	GRCh37	4	70346427	70346427	+	Silent	SNP	C	C	A	.	.	LUAD		TCGA-05-4410-01A-21D-1855-08	TCGA-05-4410-10A-01D-1855-08	C	C	.	.	.	.	.	.	.	.	.	.	.	.	.	.	.	c.1512G>T	p.%3D	p.V504V	ENST00000305107	6/6	157	119	37	160	160	0	UGT2B4,synonymous_variant,p.%3D,ENST00000305107,;UGT2B4,synonymous_variant,p.%3D,ENST00000381096,;UGT2B4,3_prime_UTR_variant,,ENST00000512583,;AC108078.1,downstream_gene_variant,,ENST00000583573,;UGT2B4,non_coding_transcript_exon_variant,,ENST00000506580,;UGT2B4,downstream_gene_variant,,ENST00000502655,;	A
TCGA-05-4410-01A-21D-1855-08	UGT2B4	0	.	GRCh37	4	70346556	70346556	+	Silent	SNP	G	G	T	.	.	LUAD		TCGA-05-4410-01A-21D-1855-08	TCGA-05-4410-10A-01D-1855-08	G	G	.	.	.	.	.	.	.	.	.	.	.	.	.	.	.	c.1383C>A	p.%3D	p.V461V	ENST00000305107	6/6	181	146	34	188	188	0	UGT2B4,synonymous_variant,p.%3D,ENST00000305107,;UGT2B4,synonymous_variant,p.%3D,ENST00000381096,;UGT2B4,3_prime_UTR_variant,,ENST00000512583,;AC108078.1,downstream_gene_variant,,ENST00000583573,;UGT2B4,non_coding_transcript_exon_variant,,ENST00000506580,;UGT2B4,downstream_gene_variant,,ENST00000502655,;	T
TCGA-05-4418-01A-01D-1265-08	UGT3A1	0	.	GRCh37	5	35968187	35968187	+	Missense_Mutation	SNP	G	G	C	.	.	LUAD		TCGA-05-4418-01A-01D-1265-08	TCGA-05-4418-10A-01D-1265-08	G	G	.	.	.	.	.	.	.	.	.	.	.	.	.	.	.	c.245C>G	p.Pro82Arg	p.P82R	ENST00000274278	3/7	39	31	7	61	61	0	UGT3A1,missense_variant,p.Pro82Arg,ENST00000274278,;UGT3A1,missense_variant,p.Pro48Arg,ENST00000507113,;UGT3A1,missense_variant,p.Pro28Arg,ENST00000333811,;UGT3A1,missense_variant,p.Pro82Arg,ENST00000503189,;UGT3A1,intron_variant,,ENST00000513233,;UGT3A1,3_prime_UTR_variant,,ENST00000515801,;	C
TCGA-05-4424-01A-22D-1855-08	UGT1A7	0	.	GRCh37	2	234591242	234591242	+	Missense_Mutation	SNP	G	G	T	.	.	LUAD		TCGA-05-4424-01A-22D-1855-08	TCGA-05-4424-10A-01D-1855-08	G	G	.	.	.	.	.	.	.	.	.	.	.	.	.	.	.	c.659G>T	p.Cys220Phe	p.C220F	ENST00000373426	1/5	366	253	113	363	363	0	UGT1A7,missense_variant,p.Cys220Phe,ENST00000373426,;UGT1A7,missense_variant,p.Cys77Phe,ENST00000485022,;UGT1A10,intron_variant,,ENST00000373445,;UGT1A10,intron_variant,,ENST00000344644,;UGT1A8,intron_variant,,ENST00000373450,;UGT1A8,intron_variant,,ENST00000609637,;UGT1A9,intron_variant,,ENST00000354728,;	T
TCGA-05-4424-01A-22D-1855-08	UGT1A8	0	.	GRCh37	2	234669362	234669362	+	Intron	SNP	C	C	A	.	.	LUAD		TCGA-05-4424-01A-22D-1855-08	TCGA-05-4424-10A-01D-1855-08	C	C	.	.	.	.	.	.	.	.	.	.	.	.	.	.	.	c.868-6318C>A	.	.	ENST00000609767	.	150	137	13	177	177	0	UGT1A8,missense_variant,p.Ser143Arg,ENST00000608383,;UGT1A8,missense_variant,p.Ser143Arg,ENST00000360418,;UGT1A1,missense_variant,p.Ser143Arg,ENST00000305208,;UGT1A10,intron_variant,,ENST00000373445,;UGT1A4,intron_variant,,ENST00000373409,;UGT1A6,intron_variant,,ENST00000305139,;UGT1A3,intron_variant,,ENST00000482026,;UGT1A6,intron_variant,,ENST00000373424,;UGT1A8,intron_variant,,ENST00000608381,…	A
TCGA-05-4424-01A-22D-1855-08	UGT1A9	0	.	GRCh37	2	234581233	234581233	+	Nonsense_Mutation	SNP	T	T	G	.	.	LUAD		TCGA-05-4424-01A-22D-1855-08	TCGA-05-4424-10A-01D-1855-08	T	T	.	.	.	.	.	.	.	.	.	.	.	.	.	.	.	c.653T>G	p.Leu218Ter	p.L218*	ENST00000354728	1/5	455	394	61	454	454	0	UGT1A8,stop_gained,p.Leu218Ter,ENST00000609637,;UGT1A9,stop_gained,p.Leu218Ter,ENST00000354728,;UGT1A10,intron_variant,,ENST00000373445,;UGT1A10,intron_variant,,ENST00000344644,;UGT1A8,intron_variant,,ENST00000373450,;	G
TCGA-05-4424-01A-22D-1855-08	UGT2B10	0	.	GRCh37	4	69692215	69692215	+	Missense_Mutation	SNP	G	G	T	rs761612483	.	LUAD		TCGA-05-4424-01A-22D-1855-08	TCGA-05-4424-10A-01D-1855-08	G	G	.	.	.	.	.	.	.	.	.	.	.	.	.	.	.	c.1087G>T	p.Gly363Cys	p.G363C	ENST00000265403	4/6	109	76	33	120	120	0	UGT2B10,missense_variant,p.Gly363Cys,ENST00000265403,;UGT2B10,missense_variant,p.Gly279Cys,ENST00000458688,;	T
TCGA-05-4427-01A-21D-1855-08	UGT1A8	0	.	GRCh37	2	234526371	234526371	+	Missense_Mutation	SNP	G	G	T	.	.	LUAD		TCGA-05-4427-01A-21D-1855-08	TCGA-05-4427-10A-01D-1855-08	G	G	.	.	.	.	.	.	.	.	.	.	.	.	.	.	.	c.18G>T	p.Trp6Cys	p.W6C	ENST00000373450	1/5	65	47	18	57	57	0	UGT1A8,missense_variant,p.Trp6Cys,ENST00000373450,;	T
TCGA-05-4430-01A-02D-1265-08	UGT2B4	0	.	GRCh37	4	70361472	70361472	+	Missense_Mutation	SNP	C	C	A	.	.	LUAD		TCGA-05-4430-01A-02D-1265-08	TCGA-05-4430-10A-01D-1265-08	C	C	.	.	.	.	.	.	.	.	.	.	.	.	.	.	.	c.108G>T	p.Trp36Cys	p.W36C	ENST00000305107	1/6	174	163	11	225	225	0	UGT2B4,missense_variant,p.Trp36Cys,ENST00000510114,;UGT2B4,missense_variant,p.Trp36Cys,ENST00000305107,;UGT2B4,missense_variant,p.Trp36Cys,ENST00000512583,;UGT2B4,intron_variant,,ENST00000381096,;UGT2B4,non_coding_transcript_exon_variant,,ENST00000506580,;UGT2B4,intron_variant,,ENST00000503836,;UGT2B4,intron_variant,,ENST00000502655,;	A
TCGA-05-4432-01A-01D-1265-08	UGT2A1	0	.	GRCh37	4	70460881	70460881	+	Silent	SNP	A	A	G	.	.	LUAD		TCGA-05-4432-01A-01D-1265-08	TCGA-05-4432-10A-01D-1265-08	A	A	.	.	.	.	.	.	.	.	.	.	.	.	.	.	.	c.1581T>C	p.%3D	p.L527L	ENST00000514019	5/7	102	78	24	105	105	0	UGT2A1,synonymous_variant,p.%3D,ENST00000286604,;UGT2A1,synonymous_variant,p.%3D,ENST00000514019,;UGT2A1,synonymous_variant,p.%3D,ENST00000503640,;UGT2A2,synonymous_variant,p.%3D,ENST00000604021,;UGT2A2,synonymous_variant,p.%3D,ENST00000457664,;UGT2A1,synonymous_variant,p.%3D,ENST00000512704,;UGT2A2,synonymous_variant,p.%3D,ENST00000604629,;UGT2A1,splice_region_variant,,ENST00000502343,;UGT2A1,do…	G
TCGA-05-4432-01A-01D-1265-08	UGT2A3	0	.	GRCh37	4	69796477	69796477	+	Missense_Mutation	SNP	G	G	T	.	.	LUAD		TCGA-05-4432-01A-01D-1265-08	TCGA-05-4432-10A-01D-1265-08	G	G	.	.	.	.	.	.	.	.	.	.	.	.	.	.	.	c.1091C>A	p.Pro364His	p.P364H	ENST00000251566	5/6	46	37	9	58	58	0	UGT2A3,missense_variant,p.Pro364His,ENST00000251566,;UGT2A3,missense_variant,p.Pro75His,ENST00000420231,;UGT2A3,3_prime_UTR_variant,,ENST00000503012,;	T
TCGA-05-4432-01A-01D-1265-08	UGT2B11	0	.	GRCh37	4	70066153	70066153	+	3'UTR	SNP	C	C	T	novel	.	LUAD		TCGA-05-4432-01A-01D-1265-08	TCGA-05-4432-10A-01D-1265-08	C	C	.	.	.	.	.	.	.	.	.	.	.	.	.	.	.	c.*5G>A	.	.	ENST00000446444	6/6	97	87	9	89	89	0	UGT2B11,3_prime_UTR_variant,,ENST00000446444,;RP11-704M14.1,non_coding_transcript_exon_variant,,ENST00000505646,;RP11-704M14.1,intron_variant,,ENST00000504301,;UGT2B11,downstream_gene_variant,,ENST00000513315,;	T
TCGA-05-4432-01A-01D-1265-08	UGT2B28	0	.	GRCh37	4	70160485	70160485	+	Silent	SNP	C	C	T	.	.	LUAD		TCGA-05-4432-01A-01D-1265-08	TCGA-05-4432-10A-01D-1265-08	C	C	.	.	.	.	.	.	.	.	.	.	.	.	.	.	.	c.1548C>T	p.%3D	p.F516F	ENST00000335568	6/6	99	93	5	86	86	0	UGT2B28,synonymous_variant,p.%3D,ENST00000335568,;UGT2B28,3_prime_UTR_variant,,ENST00000511240,;	T
TCGA-05-5423-01A-01D-1625-08	UGT3A1	0	.	GRCh37	5	35991432	35991432	+	5'UTR	SNP	G	G	T	novel	.	LUAD		TCGA-05-5423-01A-01D-1625-08	TCGA-05-5423-10A-01D-1625-08	G	G	.	.	.	.	.	.	.	.	.	.	.	.	.	.	.	c.-90C>A	.	.	ENST00000274278	1/7	19	7	12	14	14	0	UGT3A1,5_prime_UTR_variant,,ENST00000274278,;UGT3A1,5_prime_UTR_variant,,ENST00000507113,;UGT3A1,5_prime_UTR_variant,,ENST00000503189,;UGT3A1,intron_variant,,ENST00000333811,;UGT3A1,non_coding_transcript_exon_variant,,ENST00000513233,;UGT3A1,5_prime_UTR_variant,,ENST00000515801,;	T
TCGA-05-5425-01A-02D-1625-08	UGT2B11	0	.	GRCh37	4	70079862	70079862	+	Nonsense_Mutation	SNP	G	G	T	rs145784351	.	LUAD		TCGA-05-5425-01A-02D-1625-08	TCGA-05-5425-10A-01D-1625-08	G	G	.	.	.	.	.	.	.	.	.	.	.	.	.	.	.	c.579C>A	p.Tyr193Ter	p.Y193*	ENST00000446444	1/6	69	51	18	74	74	0	UGT2B11,stop_gained,p.Tyr193Ter,ENST00000446444,;RP11-704M14.1,intron_variant,,ENST00000504301,;RP11-704M14.1,intron_variant,,ENST00000505646,;RP11-704M14.2,downstream_gene_variant,,ENST00000514003,;	T
TCGA-05-5428-01A-01D-1625-08	UGT2B11	0	.	GRCh37	4	70080278	70080278	+	Missense_Mutation	SNP	C	C	G	.	.	LUAD		TCGA-05-5428-01A-01D-1625-08	TCGA-05-5428-10A-01D-1625-08	C	C	.	.	.	.	.	.	.	.	.	.	.	.	.	.	.	c.163G>C	p.Val55Leu	p.V55L	ENST00000446444	1/6	116	83	33	131	131	0	UGT2B11,missense_variant,p.Val55Leu,ENST00000446444,;RP11-704M14.1,non_coding_transcript_exon_variant,,ENST00000505646,;RP11-704M14.1,downstream_gene_variant,,ENST00000504301,;RP11-704M14.2,downstream_gene_variant,,ENST00000514003,;	G
TCGA-17-Z000-01A-01W-0746-08	UGT2A2	0	.	GRCh37	4	70504819	70504819	+	Missense_Mutation	SNP	C	C	A	novel	.	LUAD		TCGA-17-Z000-01A-01W-0746-08	TCGA-17-Z000-11A-01W-0746-08	C	C	.	.	.	.	.	.	.	.	.	.	.	.	.	.	.	c.540G>T	p.Leu180Phe	p.L180F	ENST00000457664	1/6	78	42	36	55	55	0	UGT2A2,missense_variant,p.Leu181Phe,ENST00000604021,;UGT2A2,missense_variant,p.Leu180Phe,ENST00000457664,;UGT2A1,missense_variant,p.Leu381Phe,ENST00000514019,;UGT2A2,missense_variant,p.Leu181Phe,ENST00000604629,;UGT2A1,intron_variant,,ENST00000286604,;UGT2A1,intron_variant,,ENST00000512704,;UGT2A1,intron_variant,,ENST00000503640,;	A
TCGA-17-Z000-01A-01W-0746-08	UGT2B15	0	.	GRCh37	4	69528765	69528765	+	Silent	SNP	G	G	A	rs760716704	.	LUAD		TCGA-17-Z000-01A-01W-0746-08	TCGA-17-Z000-11A-01W-0746-08	G	G	.	.	.	.	.	.	.	.	.	.	.	.	.	.	.	c.966C>T	p.%3D	p.A322A	ENST00000338206	3/6	222	137	84	140	140	0	UGT2B15,synonymous_variant,p.%3D,ENST00000338206,;	A
TCGA-17-Z001-01A-01W-0746-08	UGT1A8	0	.	GRCh37	2	234669292	234669292	+	Intron	SNP	C	C	T	.	.	LUAD		TCGA-17-Z001-01A-01W-0746-08	TCGA-17-Z001-11A-01W-0746-08	C	C	.	.	.	.	.	.	.	.	.	.	.	.	.	.	.	c.868-6388C>T	.	.	ENST00000609767	.	120	82	38	87	85	2	UGT1A8,missense_variant,p.Ser120Phe,ENST00000608383,;UGT1A8,missense_variant,p.Ser120Phe,ENST00000360418,;UGT1A1,missense_variant,p.Ser120Phe,ENST00000305208,;UGT1A10,intron_variant,,ENST00000373445,;UGT1A4,intron_variant,,ENST00000373409,;UGT1A6,intron_variant,,ENST00000305139,;UGT1A3,intron_variant,,ENST00000482026,;UGT1A6,intron_variant,,ENST00000373424,;UGT1A8,intron_variant,,ENST00000608381,…	T
TCGA-17-Z001-01A-01W-0746-08	UGT2B10	0	.	GRCh37	4	69682436	69682436	+	Missense_Mutation	SNP	G	G	C	novel	.	LUAD		TCGA-17-Z001-01A-01W-0746-08	TCGA-17-Z001-11A-01W-0746-08	G	G	.	.	.	.	.	.	.	.	.	.	.	.	.	.	.	c.699G>C	p.Gln233His	p.Q233H	ENST00000265403	1/6	47	34	13	48	48	0	UGT2B10,missense_variant,p.Gln233His,ENST00000265403,;UGT2B10,intron_variant,,ENST00000458688,;RP11-468N14.1,downstream_gene_variant,,ENST00000507455,;	C
TCGA-17-Z010-01A-01W-0746-08	UGT1A6	0	.	GRCh37	2	234602084	234602084	+	Missense_Mutation	SNP	A	A	T	rs774532563	.	LUAD		TCGA-17-Z010-01A-01W-0746-08	TCGA-17-Z010-11A-01W-0746-08	A	A	.	.	.	.	.	.	.	.	.	.	.	.	.	.	.	c.434A>T	p.Asp145Val	p.D145V	ENST00000305139	1/5	118	83	35	119	118	1	UGT1A6,missense_variant,p.Asp145Val,ENST00000441351,;UGT1A6,missense_variant,p.Asp145Val,ENST00000305139,;UGT1A10,intron_variant,,ENST00000373445,;UGT1A6,intron_variant,,ENST00000373424,;UGT1A7,intron_variant,,ENST00000373426,;UGT1A8,intron_variant,,ENST00000609637,;UGT1A10,intron_variant,,ENST00000344644,;UGT1A8,intron_variant,,ENST00000373450,;UGT1A9,intron_variant,,ENST00000354728,;UGT1A7,down…	T
TCGA-17-Z010-01A-01W-0746-08	UGT2A2	0	.	GRCh37	4	70505129	70505129	+	Missense_Mutation	SNP	G	G	C	novel	.	LUAD		TCGA-17-Z010-01A-01W-0746-08	TCGA-17-Z010-11A-01W-0746-08	G	G	.	.	.	.	.	.	.	.	.	.	.	.	.	.	.	c.230C>G	p.Pro77Arg	p.P77R	ENST00000457664	1/6	256	192	63	187	187	0	UGT2A2,missense_variant,p.Pro78Arg,ENST00000604021,;UGT2A2,missense_variant,p.Pro77Arg,ENST00000457664,;UGT2A1,missense_variant,p.Pro278Arg,ENST00000514019,;UGT2A2,missense_variant,p.Pro78Arg,ENST00000604629,;UGT2A1,intron_variant,,ENST00000286604,;UGT2A1,intron_variant,,ENST00000512704,;UGT2A1,intron_variant,,ENST00000503640,;	C
TCGA-17-Z010-01A-01W-0746-08	UGT2A2	0	.	GRCh37	4	70505336	70505336	+	Missense_Mutation	SNP	G	G	T	rs777523507	.	LUAD		TCGA-17-Z010-01A-01W-0746-08	TCGA-17-Z010-11A-01W-0746-08	G	G	.	.	.	.	.	.	.	.	.	.	.	.	.	.	.	c.23C>A	p.Thr8Asn	p.T8N	ENST00000457664	1/6	105	80	25	77	77	0	UGT2A2,missense_variant,p.Thr9Asn,ENST00000604021,;UGT2A2,missense_variant,p.Thr8Asn,ENST00000457664,;UGT2A2,missense_variant,p.Thr9Asn,ENST00000604629,;UGT2A1,intron_variant,,ENST00000286604,;UGT2A1,intron_variant,,ENST00000514019,;UGT2A1,intron_variant,,ENST00000512704,;UGT2A1,intron_variant,,ENST00000503640,;	T
TCGA-17-Z015-01A-01W-0746-08	UGT3A1	0	.	GRCh37	5	35988626	35988626	+	Missense_Mutation	SNP	C	C	A	rs368210462	.	LUAD		TCGA-17-Z015-01A-01W-0746-08	TCGA-17-Z015-11A-01W-0746-08	C	C	.	.	.	.	.	.	.	.	.	.	.	.	.	.	.	c.122G>T	p.Arg41Leu	p.R41L	ENST00000274278	2/7	122	90	31	88	88	0	UGT3A1,missense_variant,p.Arg41Leu,ENST00000274278,;UGT3A1,missense_variant,p.Arg41Leu,ENST00000503189,;UGT3A1,5_prime_UTR_variant,,ENST00000333811,;UGT3A1,intron_variant,,ENST00000507113,;UGT3A1,intron_variant,,ENST00000513233,;UGT3A1,3_prime_UTR_variant,,ENST00000515801,;	A
TCGA-17-Z018-01A-01W-0746-08	UGT3A1	0	.	GRCh37	5	35954265	35954265	+	3'UTR	SNP	C	C	A	novel	.	LUAD		TCGA-17-Z018-01A-01W-0746-08	TCGA-17-Z018-11A-01W-0746-08	C	C	.	.	.	.	.	.	.	.	.	.	.	.	.	.	.	c.*39G>T	.	.	ENST00000274278	7/7	83	68	15	62	62	0	UGT3A1,3_prime_UTR_variant,,ENST00000274278,;UGT3A1,downstream_gene_variant,,ENST00000507113,;UGT3A1,downstream_gene_variant,,ENST00000503189,;UGT3A1,downstream_gene_variant,,ENST00000513233,;UGT3A1,3_prime_UTR_variant,,ENST00000515801,;	A
TCGA-17-Z020-01A-01W-0746-08	UGT3A2	0	.	GRCh37	5	36066902	36066902	+	5'UTR	SNP	A	A	G	rs751476747	.	LUAD		TCGA-17-Z020-01A-01W-0746-08	TCGA-17-Z020-11A-01W-0746-08	A	A	.	.	.	.	.	.	.	.	.	.	.	.	.	.	.	c.-11T>C	.	.	ENST00000282507	1/7	96	73	23	195	194	1	UGT3A2,5_prime_UTR_variant,,ENST00000513300,;UGT3A2,5_prime_UTR_variant,,ENST00000545528,;UGT3A2,5_prime_UTR_variant,,ENST00000515131,;UGT3A2,5_prime_UTR_variant,,ENST00000282507,;UGT3A2,intron_variant,,ENST00000504954,;UGT3A2,5_prime_UTR_variant,,ENST00000504685,;CTD-2197M16.1,downstream_gene_variant,,ENST00000505367,;	G
TCGA-17-Z021-01A-01W-0746-08	UGT2B4	0	.	GRCh37	4	70361152	70361152	+	Nonsense_Mutation	SNP	G	G	T	novel	.	LUAD		TCGA-17-Z021-01A-01W-0746-08	TCGA-17-Z021-11A-01W-0746-08	G	G	.	.	.	.	.	.	.	.	.	.	.	.	.	.	.	c.428C>A	p.Ser143Ter	p.S143*	ENST00000305107	1/6	36	30	5	67	66	1	UGT2B4,stop_gained,p.Ser143Ter,ENST00000305107,;UGT2B4,stop_gained,p.Ser143Ter,ENST00000512583,;UGT2B4,intron_variant,,ENST00000381096,;UGT2B4,downstream_gene_variant,,ENST00000510114,;UGT2B4,non_coding_transcript_exon_variant,,ENST00000506580,;UGT2B4,intron_variant,,ENST00000503836,;UGT2B4,intron_variant,,ENST00000502655,;	T
TCGA-17-Z022-01A-01W-0746-08	UGT2B17	0	.	GRCh37	4	69403562	69403562	+	Silent	SNP	C	C	A	novel	.	LUAD		TCGA-17-Z022-01A-01W-0746-08	TCGA-17-Z022-11A-01W-0746-08	C	C	.	.	.	.	.	.	.	.	.	.	.	.	.	.	.	c.1374G>T	p.%3D	p.L458L	ENST00000317746	6/6	99	27	71	251	250	0	UGT2B17,synonymous_variant,p.%3D,ENST00000317746,;	A
TCGA-17-Z022-01A-01W-0746-08	UGT2B4	0	.	GRCh37	4	70359446	70359446	+	Missense_Mutation	SNP	C	C	G	novel	.	LUAD		TCGA-17-Z022-01A-01W-0746-08	TCGA-17-Z022-11A-01W-0746-08	C	C	.	.	.	.	.	.	.	.	.	.	.	.	.	.	.	c.835G>C	p.Gly279Arg	p.G279R	ENST00000305107	2/6	129	106	23	315	315	0	UGT2B4,missense_variant,p.Gly279Arg,ENST00000305107,;UGT2B4,missense_variant,p.Gly279Arg,ENST00000512583,;UGT2B4,missense_variant,p.Gly143Arg,ENST00000381096,;UGT2B4,downstream_gene_variant,,ENST00000510114,;UGT2B4,non_coding_transcript_exon_variant,,ENST00000506580,;UGT2B4,non_coding_transcript_exon_variant,,ENST00000503836,;UGT2B4,non_coding_transcript_exon_variant,,ENST00000502655,;	G
TCGA-17-Z022-01A-01W-0746-08	UGT3A1	0	.	GRCh37	5	35965558	35965558	+	Missense_Mutation	SNP	G	G	T	novel	.	LUAD		TCGA-17-Z022-01A-01W-0746-08	TCGA-17-Z022-11A-01W-0746-08	G	G	.	.	.	.	.	.	.	.	.	.	.	.	.	.	.	c.773C>A	p.Ala258Asp	p.A258D	ENST00000274278	4/7	141	40	101	263	263	0	UGT3A1,missense_variant,p.Ala258Asp,ENST00000274278,;UGT3A1,missense_variant,p.Ala224Asp,ENST00000507113,;UGT3A1,missense_variant,p.Ala204Asp,ENST00000333811,;UGT3A1,missense_variant,p.Ala258Asp,ENST00000503189,;UGT3A1,intron_variant,,ENST00000513233,;UGT3A1,3_prime_UTR_variant,,ENST00000515801,;	T
TCGA-17-Z023-01A-01W-0746-08	UGT1A10	0	.	GRCh37	2	234545674	234545674	+	Missense_Mutation	SNP	C	C	A	novel	.	LUAD		TCGA-17-Z023-01A-01W-0746-08	TCGA-17-Z023-11A-01W-0746-08	C	C	.	.	.	.	.	.	.	.	.	.	.	.	.	.	.	c.506C>A	p.Thr169Asn	p.T169N	ENST00000344644	1/5	165	133	31	175	175	0	UGT1A10,missense_variant,p.Thr169Asn,ENST00000373445,;UGT1A10,missense_variant,p.Thr169Asn,ENST00000344644,;UGT1A8,intron_variant,,ENST00000373450,;	A
TCGA-17-Z026-01A-01W-0746-08	UGT2A1	0	.	GRCh37	4	70460323	70460323	+	Silent	SNP	G	G	T	novel	.	LUAD		TCGA-17-Z026-01A-01W-0746-08	TCGA-17-Z026-11A-01W-0746-08	G	G	.	.	.	.	.	.	.	.	.	.	.	.	.	.	.	c.1674C>A	p.%3D	p.P558P	ENST00000514019	6/7	63	41	22	74	74	0	UGT2A1,synonymous_variant,p.%3D,ENST00000286604,;UGT2A1,synonymous_variant,p.%3D,ENST00000514019,;UGT2A1,synonymous_variant,p.%3D,ENST00000503640,;UGT2A2,synonymous_variant,p.%3D,ENST00000604021,;UGT2A2,synonymous_variant,p.%3D,ENST00000457664,;UGT2A1,synonymous_variant,p.%3D,ENST00000512704,;UGT2A2,synonymous_variant,p.%3D,ENST00000604629,;UGT2A1,non_coding_transcript_exon_variant,,ENST000005023…	T
TCGA-17-Z028-01A-01W-0746-08	UGT2A2	0	.	GRCh37	4	70505157	70505157	+	Missense_Mutation	SNP	G	G	T	novel	.	LUAD		TCGA-17-Z028-01A-01W-0746-08	TCGA-17-Z028-11A-01W-0746-08	G	G	.	.	.	.	.	.	.	.	.	.	.	.	.	.	.	c.202C>A	p.Leu68Ile	p.L68I	ENST00000457664	1/6	188	166	22	166	165	1	UGT2A2,missense_variant,p.Leu69Ile,ENST00000604021,;UGT2A2,missense_variant,p.Leu68Ile,ENST00000457664,;UGT2A1,missense_variant,p.Leu269Ile,ENST00000514019,;UGT2A2,missense_variant,p.Leu69Ile,ENST00000604629,;UGT2A1,intron_variant,,ENST00000286604,;UGT2A1,intron_variant,,ENST00000512704,;UGT2A1,intron_variant,,ENST00000503640,;	T
TCGA-17-Z028-01A-01W-0746-08	UGT2A2	0	.	GRCh37	4	70505158	70505158	+	Silent	SNP	A	A	G	novel	.	LUAD		TCGA-17-Z028-01A-01W-0746-08	TCGA-17-Z028-11A-01W-0746-08	A	A	.	.	.	.	.	.	.	.	.	.	.	.	.	.	.	c.201T>C	p.%3D	p.T67T	ENST00000457664	1/6	188	164	23	164	164	0	UGT2A2,synonymous_variant,p.%3D,ENST00000604021,;UGT2A2,synonymous_variant,p.%3D,ENST00000457664,;UGT2A1,synonymous_variant,p.%3D,ENST00000514019,;UGT2A2,synonymous_variant,p.%3D,ENST00000604629,;UGT2A1,intron_variant,,ENST00000286604,;UGT2A1,intron_variant,,ENST00000512704,;UGT2A1,intron_variant,,ENST00000503640,;	G
TCGA-17-Z030-01A-01W-0746-08	UGT2B15	0	.	GRCh37	4	69535947	69535947	+	Silent	SNP	A	A	G	novel	.	LUAD		TCGA-17-Z030-01A-01W-0746-08	TCGA-17-Z030-11A-01W-0746-08	A	A	.	.	.	.	.	.	.	.	.	.	.	.	.	.	.	c.390T>C	p.%3D	p.D130D	ENST00000338206	1/6	242	228	14	224	224	0	UGT2B15,synonymous_variant,p.%3D,ENST00000338206,;	G
TCGA-17-Z031-01A-01W-0746-08	UGT1A8	0	.	GRCh37	2	234669236	234669236	+	Intron	SNP	G	G	T	.	.	LUAD		TCGA-17-Z031-01A-01W-0746-08	TCGA-17-Z031-11A-01W-0746-08	G	G	.	.	.	.	.	.	.	.	.	.	.	.	.	.	.	c.868-6444G>T	.	.	ENST00000609767	.	253	231	22	89	89	0	UGT1A8,missense_variant,p.Glu101Asp,ENST00000608383,;UGT1A8,missense_variant,p.Glu101Asp,ENST00000360418,;UGT1A1,missense_variant,p.Glu101Asp,ENST00000305208,;UGT1A10,intron_variant,,ENST00000373445,;UGT1A4,intron_variant,,ENST00000373409,;UGT1A6,intron_variant,,ENST00000305139,;UGT1A3,intron_variant,,ENST00000482026,;UGT1A6,intron_variant,,ENST00000373424,;UGT1A8,intron_variant,,ENST00000608381,…	T
TCGA-17-Z031-01A-01W-0746-08	UGT2B17	0	.	GRCh37	4	69426262	69426262	+	Missense_Mutation	SNP	G	G	A	novel	.	LUAD		TCGA-17-Z031-01A-01W-0746-08	TCGA-17-Z031-11A-01W-0746-08	G	G	.	.	.	.	.	.	.	.	.	.	.	.	.	.	.	c.998C>T	p.Pro333Leu	p.P333L	ENST00000317746	3/6	30	25	5	38	38	0	UGT2B17,missense_variant,p.Pro333Leu,ENST00000317746,;	A
TCGA-17-Z031-01A-01W-0746-08	UGT2B4	0	.	GRCh37	4	70360982	70360982	+	Missense_Mutation	SNP	C	C	T	novel	.	LUAD		TCGA-17-Z031-01A-01W-0746-08	TCGA-17-Z031-11A-01W-0746-08	C	C	.	.	.	.	.	.	.	.	.	.	.	.	.	.	.	c.598G>A	p.Glu200Lys	p.E200K	ENST00000305107	1/6	124	52	72	100	100	0	UGT2B4,missense_variant,p.Glu200Lys,ENST00000305107,;UGT2B4,missense_variant,p.Glu200Lys,ENST00000512583,;UGT2B4,missense_variant,p.Glu64Lys,ENST00000381096,;UGT2B4,downstream_gene_variant,,ENST00000510114,;UGT2B4,non_coding_transcript_exon_variant,,ENST00000502655,;UGT2B4,intron_variant,,ENST00000506580,;UGT2B4,intron_variant,,ENST00000503836,;	T
TCGA-17-Z031-01A-01W-0746-08	UGT3A2	0	.	GRCh37	5	36035779	36035779	+	3'UTR	SNP	C	C	T	novel	.	LUAD		TCGA-17-Z031-01A-01W-0746-08	TCGA-17-Z031-11A-01W-0746-08	C	C	.	.	.	.	.	.	.	.	.	.	.	.	.	.	.	c.*21G>A	.	.	ENST00000282507	7/7	103	73	29	51	51	0	UGT3A2,3_prime_UTR_variant,,ENST00000513300,;UGT3A2,3_prime_UTR_variant,,ENST00000545528,;UGT3A2,3_prime_UTR_variant,,ENST00000282507,;UGT3A2,downstream_gene_variant,,ENST00000504954,;UGT3A2,3_prime_UTR_variant,,ENST00000504685,;	T
TCGA-17-Z036-01A-01W-0746-08	UGT2A2	0	.	GRCh37	4	70505119	70505119	+	Silent	SNP	A	A	G	rs748886353	.	LUAD		TCGA-17-Z036-01A-01W-0746-08	TCGA-17-Z036-11A-01W-0746-08	A	A	.	.	.	.	.	.	.	.	.	.	.	.	.	.	.	c.240T>C	p.%3D	p.F80F	ENST00000457664	1/6	172	110	61	264	264	0	UGT2A2,synonymous_variant,p.%3D,ENST00000604021,;UGT2A2,synonymous_variant,p.%3D,ENST00000457664,;UGT2A1,synonymous_variant,p.%3D,ENST00000514019,;UGT2A2,synonymous_variant,p.%3D,ENST00000604629,;UGT2A1,intron_variant,,ENST00000286604,;UGT2A1,intron_variant,,ENST00000512704,;UGT2A1,intron_variant,,ENST00000503640,;	G
TCGA-17-Z042-01A-01W-0746-08	UGT2B10	0	.	GRCh37	4	69693248	69693248	+	Missense_Mutation	SNP	C	C	G	novel	.	LUAD		TCGA-17-Z042-01A-01W-0746-08	TCGA-17-Z042-11A-01W-0746-08	C	C	.	.	.	.	.	.	.	.	.	.	.	.	.	.	.	c.1289C>G	p.Thr430Arg	p.T430R	ENST00000265403	5/6	121	101	19	101	101	0	UGT2B10,missense_variant,p.Thr430Arg,ENST00000265403,;UGT2B10,missense_variant,p.Thr346Arg,ENST00000458688,;	G
TCGA-17-Z049-01A-01W-0746-08	UGT1A10	0	.	GRCh37	2	234545533	234545533	+	Missense_Mutation	SNP	C	C	T	rs145610800	.	LUAD		TCGA-17-Z049-01A-01W-0746-08	TCGA-17-Z049-11A-01W-0747-08	C	C	.	.	.	.	.	.	.	.	.	.	.	.	.	.	.	c.365C>T	p.Ser122Leu	p.S122L	ENST00000344644	1/5	218	109	108	374	374	0	UGT1A10,missense_variant,p.Ser122Leu,ENST00000373445,;UGT1A10,missense_variant,p.Ser122Leu,ENST00000344644,;UGT1A8,intron_variant,,ENST00000373450,;	T
TCGA-17-Z049-01A-01W-0746-08	UGT1A10	0	.	GRCh37	2	234676544	234676544	+	Missense_Mutation	SNP	C	C	A	rs776227074	.	LUAD		TCGA-17-Z049-01A-01W-0746-08	TCGA-17-Z049-11A-01W-0747-08	C	C	.	.	.	.	.	.	.	.	.	.	.	.	.	.	.	c.1037C>A	p.Thr346Lys	p.T346K	ENST00000344644	3/5	199	152	46	269	269	0	UGT1A10,missense_variant,p.Thr346Lys,ENST00000373445,;UGT1A4,missense_variant,p.Thr350Lys,ENST00000373409,;UGT1A6,missense_variant,p.Thr348Lys,ENST00000305139,;UGT1A3,missense_variant,p.Thr350Lys,ENST00000482026,;UGT1A6,missense_variant,p.Thr81Lys,ENST00000373424,;UGT1A8,missense_variant,p.Thr349Lys,ENST00000608383,;UGT1A8,missense_variant,p.Thr350Lys,ENST00000608381,;UGT1A7,missense_variant,p.Th…	A
TCGA-17-Z049-01A-01W-0746-08	UGT2B28	0	.	GRCh37	4	70146819	70146819	+	Silent	SNP	T	T	C	novel	.	LUAD		TCGA-17-Z049-01A-01W-0746-08	TCGA-17-Z049-11A-01W-0747-08	T	T	.	.	.	.	.	.	.	.	.	.	.	.	.	.	.	c.601T>C	p.%3D	p.L201L	ENST00000335568	1/6	132	54	78	220	218	2	UGT2B28,synonymous_variant,p.%3D,ENST00000511240,;UGT2B28,synonymous_variant,p.%3D,ENST00000335568,;	C
TCGA-17-Z050-01A-01W-0747-08	UGT2B28	0	.	GRCh37	4	70152596	70152596	+	Missense_Mutation	SNP	C	C	A	rs752438639	.	LUAD		TCGA-17-Z050-01A-01W-0747-08	TCGA-17-Z050-11A-01W-0747-08	C	C	.	.	.	.	.	.	.	.	.	.	.	.	.	.	.	c.997C>A	p.Gln333Lys	p.Q333K	ENST00000335568	3/6	473	357	115	501	500	1	UGT2B28,missense_variant,p.Gln333Lys,ENST00000511240,;UGT2B28,missense_variant,p.Gln333Lys,ENST00000335568,;	A
TCGA-17-Z055-01A-01W-0747-08	UGT3A1	0	.	GRCh37	5	35965803	35965803	+	Silent	SNP	C	C	A	rs746813440	.	LUAD		TCGA-17-Z055-01A-01W-0747-08	TCGA-17-Z055-11A-01W-0747-08	C	C	.	.	.	.	.	.	.	.	.	.	.	.	.	.	.	c.528G>T	p.%3D	p.G176G	ENST00000274278	4/7	255	200	54	224	224	0	UGT3A1,synonymous_variant,p.%3D,ENST00000274278,;UGT3A1,synonymous_variant,p.%3D,ENST00000507113,;UGT3A1,synonymous_variant,p.%3D,ENST00000333811,;UGT3A1,synonymous_variant,p.%3D,ENST00000503189,;UGT3A1,intron_variant,,ENST00000513233,;UGT3A1,3_prime_UTR_variant,,ENST00000515801,;	A
TCGA-17-Z056-01A-01W-0747-08	UGT1A7	0	.	GRCh37	2	234591160	234591160	+	Missense_Mutation	SNP	C	C	A	rs368267055	.	LUAD		TCGA-17-Z056-01A-01W-0747-08	TCGA-17-Z056-11A-01W-0747-08	C	C	.	.	.	.	.	.	.	.	.	.	.	.	.	.	.	c.577C>A	p.Leu193Ile	p.L193I	ENST00000373426	1/5	525	453	71	643	643	0	UGT1A7,missense_variant,p.Leu193Ile,ENST00000373426,;UGT1A7,missense_variant,p.Leu50Ile,ENST00000485022,;UGT1A10,intron_variant,,ENST00000373445,;UGT1A10,intron_variant,,ENST00000344644,;UGT1A8,intron_variant,,ENST00000373450,;UGT1A8,intron_variant,,ENST00000609637,;UGT1A9,intron_variant,,ENST00000354728,;	A
TCGA-17-Z056-01A-01W-0747-08	UGT2B4	0	.	GRCh37	4	70360959	70360959	+	Missense_Mutation	SNP	G	G	C	novel	.	LUAD		TCGA-17-Z056-01A-01W-0747-08	TCGA-17-Z056-11A-01W-0747-08	G	G	.	.	.	.	.	.	.	.	.	.	.	.	.	.	.	c.621C>G	p.Phe207Leu	p.F207L	ENST00000305107	1/6	105	83	22	182	182	0	UGT2B4,missense_variant,p.Phe207Leu,ENST00000305107,;UGT2B4,missense_variant,p.Phe207Leu,ENST00000512583,;UGT2B4,missense_variant,p.Phe71Leu,ENST00000381096,;UGT2B4,downstream_gene_variant,,ENST00000510114,;UGT2B4,non_coding_transcript_exon_variant,,ENST00000502655,;UGT2B4,intron_variant,,ENST00000506580,;UGT2B4,intron_variant,,ENST00000503836,;	C
TCGA-17-Z056-01A-01W-0747-08	UGT3A2	0	.	GRCh37	5	36037907	36037907	+	Missense_Mutation	SNP	T	T	A	novel	.	LUAD		TCGA-17-Z056-01A-01W-0747-08	TCGA-17-Z056-11A-01W-0747-08	T	T	.	.	.	.	.	.	.	.	.	.	.	.	.	.	.	c.1287A>T	p.Glu429Asp	p.E429D	ENST00000282507	6/7	451	439	12	402	402	0	UGT3A2,missense_variant,p.Glu395Asp,ENST00000513300,;UGT3A2,missense_variant,p.Glu127Asp,ENST00000545528,;UGT3A2,missense_variant,p.Glu429Asp,ENST00000282507,;UGT3A2,downstream_gene_variant,,ENST00000504954,;UGT3A2,3_prime_UTR_variant,,ENST00000504685,;	A
TCGA-17-Z059-01A-01W-0747-08	UGT1A7	0	.	GRCh37	2	234590823	234590823	+	Silent	SNP	A	A	C	novel	.	LUAD		TCGA-17-Z059-01A-01W-0747-08	TCGA-17-Z059-11A-01W-0747-08	A	A	.	.	.	.	.	.	.	.	.	.	.	.	.	.	.	c.240A>C	p.%3D	p.S80S	ENST00000373426	1/5	470	379	91	355	352	2	UGT1A7,synonymous_variant,p.%3D,ENST00000373426,;UGT1A10,intron_variant,,ENST00000373445,;UGT1A10,intron_variant,,ENST00000344644,;UGT1A8,intron_variant,,ENST00000373450,;UGT1A8,intron_variant,,ENST00000609637,;UGT1A9,intron_variant,,ENST00000354728,;UGT1A7,upstream_gene_variant,,ENST00000485022,;	C
TCGA-17-Z062-01A-01W-0747-08	UGT2A2	0	.	GRCh37	4	70504767	70504767	+	Missense_Mutation	SNP	G	G	T	novel	.	LUAD		TCGA-17-Z062-01A-01W-0747-08	TCGA-17-Z062-11A-01W-0747-08	G	G	.	.	.	.	.	.	.	.	.	.	.	.	.	.	.	c.592C>A	p.Pro198Thr	p.P198T	ENST00000457664	1/6	77	70	7	71	71	0	UGT2A2,missense_variant,p.Pro199Thr,ENST00000604021,;UGT2A2,missense_variant,p.Pro198Thr,ENST00000457664,;UGT2A1,missense_variant,p.Pro399Thr,ENST00000514019,;UGT2A2,missense_variant,p.Pro199Thr,ENST00000604629,;UGT2A1,intron_variant,,ENST00000286604,;UGT2A1,intron_variant,,ENST00000512704,;UGT2A1,intron_variant,,ENST00000503640,;	T
TCGA-17-Z062-01A-01W-0747-08	UGT2A2	0	.	GRCh37	4	70504773	70504773	+	Missense_Mutation	SNP	G	G	T	novel	.	LUAD		TCGA-17-Z062-01A-01W-0747-08	TCGA-17-Z062-11A-01W-0747-08	G	G	.	.	.	.	.	.	.	.	.	.	.	.	.	.	.	c.586C>A	p.Pro196Thr	p.P196T	ENST00000457664	1/6	80	70	9	69	69	0	UGT2A2,missense_variant,p.Pro197Thr,ENST00000604021,;UGT2A2,missense_variant,p.Pro196Thr,ENST00000457664,;UGT2A1,missense_variant,p.Pro397Thr,ENST00000514019,;UGT2A2,missense_variant,p.Pro197Thr,ENST00000604629,;UGT2A1,intron_variant,,ENST00000286604,;UGT2A1,intron_variant,,ENST00000512704,;UGT2A1,intron_variant,,ENST00000503640,;	T
TCGA-35-4123-01A-01D-1105-08	UGT2B28	0	.	GRCh37	4	70156378	70156378	+	Missense_Mutation	SNP	G	G	T	.	.	LUAD		TCGA-35-4123-01A-01D-1105-08	TCGA-35-4123-10A-01D-1105-08	G	G	.	.	.	.	.	.	.	.	.	.	.	.	.	.	.	c.1159G>T	p.Gly387Trp	p.G387W	ENST00000335568	5/6	98	87	11	126	126	0	UGT2B28,missense_variant,p.Gly387Trp,ENST00000335568,;UGT2B28,intron_variant,,ENST00000511240,;	T
TCGA-35-5375-01A-01D-1625-08	UGT3A1	0	.	GRCh37	5	35991414	35991414	+	5'UTR	SNP	C	C	T	novel	.	LUAD		TCGA-35-5375-01A-01D-1625-08	TCGA-35-5375-10A-01D-1625-08	C	C	.	.	.	.	.	.	.	.	.	.	.	.	.	.	.	c.-72G>A	.	.	ENST00000274278	1/7	33	30	3	14	14	0	UGT3A1,5_prime_UTR_variant,,ENST00000274278,;UGT3A1,5_prime_UTR_variant,,ENST00000507113,;UGT3A1,5_prime_UTR_variant,,ENST00000503189,;UGT3A1,intron_variant,,ENST00000333811,;UGT3A1,non_coding_transcript_exon_variant,,ENST00000513233,;UGT3A1,5_prime_UTR_variant,,ENST00000515801,;	T
TCGA-38-4625-01A-01D-1553-08	UGT1A10	0	.	GRCh37	2	234676909	234676909	+	Missense_Mutation	SNP	T	T	A	.	.	LUAD		TCGA-38-4625-01A-01D-1553-08	TCGA-38-4625-11A-01D-1553-08	T	T	.	.	.	.	.	.	.	.	.	.	.	.	.	.	.	c.1119T>A	p.His373Gln	p.H373Q	ENST00000344644	4/5	156	130	26	144	144	0	UGT1A10,missense_variant,p.His373Gln,ENST00000373445,;UGT1A4,missense_variant,p.His377Gln,ENST00000373409,;UGT1A6,missense_variant,p.His375Gln,ENST00000305139,;UGT1A3,missense_variant,p.His377Gln,ENST00000482026,;UGT1A6,missense_variant,p.His108Gln,ENST00000373424,;UGT1A8,missense_variant,p.His376Gln,ENST00000608383,;UGT1A8,missense_variant,p.His377Gln,ENST00000608381,;UGT1A7,missense_variant,p.H…	A
TCGA-38-4629-01A-02D-1265-08	UGT2B11	0	.	GRCh37	4	70066085	70066085	+	3'UTR	SNP	C	C	A	novel	.	LUAD		TCGA-38-4629-01A-02D-1265-08	TCGA-38-4629-11A-01D-1265-08	C	C	.	.	.	.	.	.	.	.	.	.	.	.	.	.	.	c.*73G>T	.	.	ENST00000446444	6/6	24	16	8	44	44	0	UGT2B11,3_prime_UTR_variant,,ENST00000446444,;RP11-704M14.1,intron_variant,,ENST00000504301,;RP11-704M14.1,upstream_gene_variant,,ENST00000505646,;UGT2B11,downstream_gene_variant,,ENST00000513315,;	A
TCGA-38-4631-01A-01D-1753-08	UGT2B28	0	.	GRCh37	4	70156417	70156417	+	Missense_Mutation	SNP	C	C	A	novel	.	LUAD		TCGA-38-4631-01A-01D-1753-08	TCGA-38-4631-11A-01D-1753-08	C	C	.	.	.	.	.	.	.	.	.	.	.	.	.	.	.	c.1198C>A	p.Pro400Thr	p.P400T	ENST00000335568	5/6	197	151	45	188	188	0	UGT2B28,missense_variant,p.Pro400Thr,ENST00000335568,;UGT2B28,intron_variant,,ENST00000511240,;	A
TCGA-38-4631-01A-01D-1753-08	UGT2B28	0	.	GRCh37	4	70156418	70156418	+	Missense_Mutation	SNP	C	C	A	rs749298070	.	LUAD		TCGA-38-4631-01A-01D-1753-08	TCGA-38-4631-11A-01D-1753-08	C	C	.	.	.	.	.	.	.	.	.	.	.	.	.	.	.	c.1199C>A	p.Pro400His	p.P400H	ENST00000335568	5/6	200	153	47	190	190	0	UGT2B28,missense_variant,p.Pro400His,ENST00000335568,;UGT2B28,intron_variant,,ENST00000511240,;	A
TCGA-38-4632-01A-01D-1753-08	UGT2B4	0	.	GRCh37	4	70361447	70361447	+	Missense_Mutation	SNP	C	C	T	rs767979359	.	LUAD		TCGA-38-4632-01A-01D-1753-08	TCGA-38-4632-11A-01D-1753-08	C	C	.	.	.	.	.	.	.	.	.	.	.	.	.	.	.	c.133G>A	p.Glu45Lys	p.E45K	ENST00000305107	1/6	115	88	26	127	126	1	UGT2B4,missense_variant,p.Glu45Lys,ENST00000510114,;UGT2B4,missense_variant,p.Glu45Lys,ENST00000305107,;UGT2B4,missense_variant,p.Glu45Lys,ENST00000512583,;UGT2B4,intron_variant,,ENST00000381096,;UGT2B4,non_coding_transcript_exon_variant,,ENST00000506580,;UGT2B4,intron_variant,,ENST00000503836,;UGT2B4,intron_variant,,ENST00000502655,;	T
TCGA-38-4632-01A-01D-1753-08	UGT2B4	0	.	GRCh37	4	70361573	70361573	+	Missense_Mutation	SNP	T	T	A	.	.	LUAD		TCGA-38-4632-01A-01D-1753-08	TCGA-38-4632-11A-01D-1753-08	T	T	.	.	.	.	.	.	.	.	.	.	.	.	.	.	.	c.7A>T	p.Met3Leu	p.M3L	ENST00000305107	1/6	150	127	22	221	220	1	UGT2B4,missense_variant,p.Met3Leu,ENST00000510114,;UGT2B4,missense_variant,p.Met3Leu,ENST00000305107,;UGT2B4,missense_variant,p.Met3Leu,ENST00000512583,;UGT2B4,intron_variant,,ENST00000381096,;UGT2B4,non_coding_transcript_exon_variant,,ENST00000506580,;UGT2B4,intron_variant,,ENST00000503836,;UGT2B4,intron_variant,,ENST00000502655,;	A
TCGA-38-4632-01A-01D-1753-08	UGT3A1	0	.	GRCh37	5	35965971	35965971	+	Missense_Mutation	SNP	T	T	A	rs144943338	.	LUAD		TCGA-38-4632-01A-01D-1753-08	TCGA-38-4632-11A-01D-1753-08	T	T	.	.	.	.	.	.	.	.	.	.	.	.	.	.	.	c.360A>T	p.Gln120His	p.Q120H	ENST00000274278	4/7	76	67	9	73	73	0	UGT3A1,missense_variant,p.Gln120His,ENST00000274278,;UGT3A1,missense_variant,p.Gln86His,ENST00000507113,;UGT3A1,missense_variant,p.Gln66His,ENST00000333811,;UGT3A1,missense_variant,p.Gln120His,ENST00000503189,;UGT3A1,intron_variant,,ENST00000513233,;UGT3A1,3_prime_UTR_variant,,ENST00000515801,;	A
TCGA-38-4632-01A-01D-1753-08	UGT3A2	0	.	GRCh37	5	36035765	36035765	+	3'UTR	SNP	C	C	A	novel	.	LUAD		TCGA-38-4632-01A-01D-1753-08	TCGA-38-4632-11A-01D-1753-08	C	C	.	.	.	.	.	.	.	.	.	.	.	.	.	.	.	c.*35G>T	.	.	ENST00000282507	7/7	33	28	4	22	22	0	UGT3A2,3_prime_UTR_variant,,ENST00000513300,;UGT3A2,3_prime_UTR_variant,,ENST00000545528,;UGT3A2,3_prime_UTR_variant,,ENST00000282507,;UGT3A2,downstream_gene_variant,,ENST00000504954,;UGT3A2,3_prime_UTR_variant,,ENST00000504685,;	A
TCGA-38-4632-01A-01D-1753-08	UGT8	0	.	GRCh37	4	115544547	115544547	+	Missense_Mutation	SNP	C	C	T	rs371402834	.	LUAD		TCGA-38-4632-01A-01D-1753-08	TCGA-38-4632-11A-01D-1753-08	C	C	.	.	.	.	.	.	.	.	.	.	.	.	.	.	.	c.511C>T	p.Pro171Ser	p.P171S	ENST00000310836	2/6	88	72	15	124	124	0	UGT8,missense_variant,p.Pro171Ser,ENST00000310836,;UGT8,missense_variant,p.Pro171Ser,ENST00000394511,;UGT8,downstream_gene_variant,,ENST00000507710,;	T
TCGA-38-6178-01A-11D-1753-08	UGT2B17	0	.	GRCh37	4	69433758	69433758	+	Missense_Mutation	SNP	G	G	A	rs146354188	.	LUAD		TCGA-38-6178-01A-11D-1753-08	TCGA-38-6178-10A-01D-1753-08	G	G	.	.	.	.	.	.	.	.	.	.	.	.	.	.	.	c.445C>T	p.Leu149Phe	p.L149F	ENST00000317746	1/6	196	173	23	251	251	0	UGT2B17,missense_variant,p.Leu149Phe,ENST00000317746,;	A
TCGA-44-2656-01A-41D-A27T-08	UGT2A1	0	.	GRCh37	4	70513291	70513291	+	Missense_Mutation	SNP	C	C	A	.	.	LUAD		TCGA-44-2656-01A-41D-A27T-08	TCGA-44-2656-10A-01D-A271-08	C	C	.	.	.	.	.	.	.	.	.	.	.	.	.	.	.	c.72G>T	p.Leu24Phe	p.L24F	ENST00000514019	2/7	49	35	13	30	30	0	UGT2A1,missense_variant,p.Leu24Phe,ENST00000505512,;UGT2A1,missense_variant,p.Leu24Phe,ENST00000286604,;UGT2A1,missense_variant,p.Leu24Phe,ENST00000514019,;UGT2A1,missense_variant,p.Leu24Phe,ENST00000512704,;UGT2A1,missense_variant,p.Leu24Phe,ENST00000503640,;	A
TCGA-44-2656-01A-41D-A27T-08	UGT2A3	0	.	GRCh37	4	69811061	69811061	+	Missense_Mutation	SNP	C	C	T	.	.	LUAD		TCGA-44-2656-01A-41D-A27T-08	TCGA-44-2656-10A-01D-A271-08	C	C	.	.	.	.	.	.	.	.	.	.	.	.	.	.	.	c.827G>A	p.Gly276Glu	p.G276E	ENST00000251566	2/6	87	68	19	52	52	0	UGT2A3,missense_variant,p.Gly276Glu,ENST00000251566,;UGT2A3,5_prime_UTR_variant,,ENST00000420231,;UGT2A3,missense_variant,p.Gly142Glu,ENST00000503012,;	T
TCGA-44-2657-01A-01D-1105-08	UGT1A10	0	.	GRCh37	2	234545440	234545440	+	Missense_Mutation	SNP	T	T	A	rs141009803	.	LUAD		TCGA-44-2657-01A-01D-1105-08	TCGA-44-2657-10A-01D-1105-08	T	T	.	.	.	.	.	.	.	.	.	.	.	.	.	.	.	c.272T>A	p.Met91Lys	p.M91K	ENST00000344644	1/5	205	173	31	158	158	0	UGT1A10,missense_variant,p.Met91Lys,ENST00000373445,;UGT1A10,missense_variant,p.Met91Lys,ENST00000344644,;UGT1A8,intron_variant,,ENST00000373450,;	A
TCGA-44-2659-01A-01D-0969-08	UGT1A10	0	.	GRCh37	2	234545808	234545808	+	Missense_Mutation	SNP	T	T	A	.	.	LUAD		TCGA-44-2659-01A-01D-0969-08	TCGA-44-2659-10A-01D-0969-08	T	T	.	.	.	.	.	.	.	.	.	.	.	.	.	.	.	c.640T>A	p.Leu214Met	p.L214M	ENST00000344644	1/5	386	318	68	447	447	0	UGT1A10,missense_variant,p.Leu214Met,ENST00000373445,;UGT1A10,missense_variant,p.Leu214Met,ENST00000344644,;UGT1A8,intron_variant,,ENST00000373450,;	A
TCGA-44-2668-01A-01D-A271-08	UGT2B7	0	.	GRCh37	4	69973836	69973836	+	Missense_Mutation	SNP	G	G	T	.	.	LUAD		TCGA-44-2668-01A-01D-A271-08	TCGA-44-2668-10A-01D-A271-08	G	G	.	.	.	.	.	.	.	.	.	.	.	.	.	.	.	c.1106G>T	p.Arg369Ile	p.R369I	ENST00000305231	5/6	97	83	13	100	100	0	UGT2B7,missense_variant,p.Arg369Ile,ENST00000305231,;UGT2B7,missense_variant,p.Arg120Ile,ENST00000502942,;UGT2B7,intron_variant,,ENST00000508661,;UGT2B7,intron_variant,,ENST00000509763,;	T
TCGA-44-3396-01A-01D-1553-08	UGT2B10	0	.	GRCh37	4	69682206	69682206	+	Nonsense_Mutation	SNP	G	G	T	novel	.	LUAD		TCGA-44-3396-01A-01D-1553-08	TCGA-44-3396-10A-01D-1265-08	G	G	.	.	.	.	.	.	.	.	.	.	.	.	.	.	.	c.469G>T	p.Glu157Ter	p.E157*	ENST00000265403	1/6	213	194	19	125	125	0	UGT2B10,stop_gained,p.Glu157Ter,ENST00000265403,;UGT2B10,splice_region_variant,,ENST00000458688,;RP11-468N14.1,downstream_gene_variant,,ENST00000507455,;	T
TCGA-44-3918-01A-01D-A271-08	UGT2B4	0	.	GRCh37	4	70346519	70346519	+	Missense_Mutation	SNP	T	T	C	.	.	LUAD		TCGA-44-3918-01A-01D-A271-08	TCGA-44-3918-10A-01D-A271-08	T	T	.	.	.	.	.	.	.	.	.	.	.	.	.	.	.	c.1420A>G	p.Lys474Glu	p.K474E	ENST00000305107	6/6	162	138	23	167	167	0	UGT2B4,missense_variant,p.Lys474Glu,ENST00000305107,;UGT2B4,missense_variant,p.Lys338Glu,ENST00000381096,;UGT2B4,3_prime_UTR_variant,,ENST00000512583,;AC108078.1,downstream_gene_variant,,ENST00000583573,;UGT2B4,non_coding_transcript_exon_variant,,ENST00000506580,;UGT2B4,downstream_gene_variant,,ENST00000502655,;	C
TCGA-44-3918-01A-01D-A271-08	UGT2B4	0	.	GRCh37	4	70346553	70346553	+	Missense_Mutation	SNP	G	G	T	rs745780826	.	LUAD		TCGA-44-3918-01A-01D-A271-08	TCGA-44-3918-10A-01D-A271-08	G	G	.	.	.	.	.	.	.	.	.	.	.	.	.	.	.	c.1386C>A	p.Phe462Leu	p.F462L	ENST00000305107	6/6	150	127	23	159	159	0	UGT2B4,missense_variant,p.Phe462Leu,ENST00000305107,;UGT2B4,missense_variant,p.Phe326Leu,ENST00000381096,;UGT2B4,3_prime_UTR_variant,,ENST00000512583,;AC108078.1,downstream_gene_variant,,ENST00000583573,;UGT2B4,non_coding_transcript_exon_variant,,ENST00000506580,;UGT2B4,downstream_gene_variant,,ENST00000502655,;	T
TCGA-44-3918-01A-01D-A271-08	UGT2B4	0	.	GRCh37	4	70346519	70346519	+	Missense_Mutation	SNP	T	T	C	.	.	LUAD		TCGA-44-3918-01A-01D-A271-08	TCGA-44-3918-11A-01D-1105-08	T	T	.	.	.	.	.	.	.	.	.	.	.	.	.	.	.	c.1420A>G	p.Lys474Glu	p.K474E	ENST00000305107	6/6	162	138	23	222	222	0	UGT2B4,missense_variant,p.Lys474Glu,ENST00000305107,;UGT2B4,missense_variant,p.Lys338Glu,ENST00000381096,;UGT2B4,3_prime_UTR_variant,,ENST00000512583,;AC108078.1,downstream_gene_variant,,ENST00000583573,;UGT2B4,non_coding_transcript_exon_variant,,ENST00000506580,;UGT2B4,downstream_gene_variant,,ENST00000502655,;	C
TCGA-44-3918-01A-01D-A271-08	UGT2B4	0	.	GRCh37	4	70346553	70346553	+	Missense_Mutation	SNP	G	G	T	rs745780826	.	LUAD		TCGA-44-3918-01A-01D-A271-08	TCGA-44-3918-11A-01D-1105-08	G	G	.	.	.	.	.	.	.	.	.	.	.	.	.	.	.	c.1386C>A	p.Phe462Leu	p.F462L	ENST00000305107	6/6	150	127	23	211	211	0	UGT2B4,missense_variant,p.Phe462Leu,ENST00000305107,;UGT2B4,missense_variant,p.Phe326Leu,ENST00000381096,;UGT2B4,3_prime_UTR_variant,,ENST00000512583,;AC108078.1,downstream_gene_variant,,ENST00000583573,;UGT2B4,non_coding_transcript_exon_variant,,ENST00000506580,;UGT2B4,downstream_gene_variant,,ENST00000502655,;	T
TCGA-44-3919-01A-02D-1458-08	UGT1A3	0	.	GRCh37	2	234638177	234638177	+	Missense_Mutation	SNP	G	G	T	rs757870746	.	LUAD	1	TCGA-44-3919-01A-02D-1458-08	TCGA-44-3919-10A-01D-1458-08	G	G	.	.	.	.	.	.	.	.	.	.	.	.	.	.	.	c.405G>T	p.Glu135Asp	p.E135D	ENST00000482026	1/5	454	347	107	479	479	0	UGT1A3,missense_variant,p.Glu135Asp,ENST00000482026,;UGT1A8,missense_variant,p.Glu135Asp,ENST00000609767,;UGT1A10,intron_variant,,ENST00000373445,;UGT1A4,intron_variant,,ENST00000373409,;UGT1A6,intron_variant,,ENST00000305139,;UGT1A6,intron_variant,,ENST00000373424,;UGT1A8,intron_variant,,ENST00000608381,;UGT1A7,intron_variant,,ENST00000373426,;UGT1A8,intron_variant,,ENST00000609637,;UGT1A5,intro…	T
TCGA-44-4112-01A-31D-A27T-08	UGT2B15	0	.	GRCh37	4	69535962	69535962	+	Missense_Mutation	SNP	G	G	T	.	.	LUAD		TCGA-44-4112-01A-31D-A27T-08	TCGA-44-4112-10A-01D-A271-08	G	G	.	.	.	.	.	.	.	.	.	.	.	.	.	.	.	c.375C>A	p.Asn125Lys	p.N125K	ENST00000338206	1/6	246	203	42	111	111	0	UGT2B15,missense_variant,p.Asn125Lys,ENST00000338206,;	T
TCGA-44-4112-01A-31D-A27T-08	UGT3A1	0	.	GRCh37	5	35988559	35988560	+	Frame_Shift_Ins	INS	-	-	A	novel	.	LUAD		TCGA-44-4112-01A-31D-A27T-08	TCGA-44-4112-10A-01D-A271-08	-	-	.	.	.	.	.	.	.	.	.	.	.	.	.	.	.	c.188dupT	p.Leu63PhefsTer6	p.L63Ffs*6	ENST00000274278	2/7	111	88	23	44	44	0	UGT3A1,frameshift_variant,p.Leu63PhefsTer6,ENST00000274278,;UGT3A1,frameshift_variant,p.Leu9PhefsTer6,ENST00000333811,;UGT3A1,frameshift_variant,p.Leu63PhefsTer6,ENST00000503189,;UGT3A1,intron_variant,,ENST00000507113,;UGT3A1,intron_variant,,ENST00000513233,;UGT3A1,3_prime_UTR_variant,,ENST00000515801,;	A
TCGA-44-5644-01A-21D-2036-08	UGT1A8	0	.	GRCh37	2	234669003	234669003	+	Intron	SNP	G	G	A	.	.	LUAD		TCGA-44-5644-01A-21D-2036-08	TCGA-44-5644-10A-01D-2036-08	G	G	.	.	.	.	.	.	.	.	.	.	.	.	.	.	.	c.868-6677G>A	.	.	ENST00000609767	.	27	17	10	18	18	0	UGT1A8,missense_variant,p.Val24Met,ENST00000608383,;UGT1A8,missense_variant,p.Val24Met,ENST00000360418,;UGT1A1,missense_variant,p.Val24Met,ENST00000305208,;UGT1A10,intron_variant,,ENST00000373445,;UGT1A4,intron_variant,,ENST00000373409,;UGT1A6,intron_variant,,ENST00000305139,;UGT1A3,intron_variant,,ENST00000482026,;UGT1A6,intron_variant,,ENST00000373424,;UGT1A8,intron_variant,,ENST00000608381,;UG…	A
TCGA-44-5644-01A-21D-2036-08	UGT2B4	0	.	GRCh37	4	70359506	70359506	+	Silent	SNP	G	G	T	rs774803544	.	LUAD		TCGA-44-5644-01A-21D-2036-08	TCGA-44-5644-10A-01D-2036-08	G	G	.	.	.	.	.	.	.	.	.	.	.	.	.	.	.	c.775C>A	p.%3D	p.R259R	ENST00000305107	2/6	46	17	29	54	54	0	UGT2B4,synonymous_variant,p.%3D,ENST00000305107,;UGT2B4,synonymous_variant,p.%3D,ENST00000512583,;UGT2B4,synonymous_variant,p.%3D,ENST00000381096,;UGT2B4,downstream_gene_variant,,ENST00000510114,;UGT2B4,non_coding_transcript_exon_variant,,ENST00000506580,;UGT2B4,non_coding_transcript_exon_variant,,ENST00000503836,;UGT2B4,non_coding_transcript_exon_variant,,ENST00000502655,;	T
TCGA-44-5644-01A-21D-2036-08	UGT3A2	0	.	GRCh37	5	36066872	36066872	+	Missense_Mutation	SNP	A	A	G	rs770447742	.	LUAD		TCGA-44-5644-01A-21D-2036-08	TCGA-44-5644-10A-01D-2036-08	A	A	.	.	.	.	.	.	.	.	.	.	.	.	.	.	.	c.20T>C	p.Leu7Pro	p.L7P	ENST00000282507	1/7	361	285	75	143	143	0	UGT3A2,missense_variant,p.Leu7Pro,ENST00000513300,;UGT3A2,missense_variant,p.Leu7Pro,ENST00000515131,;UGT3A2,missense_variant,p.Leu7Pro,ENST00000282507,;UGT3A2,5_prime_UTR_variant,,ENST00000545528,;UGT3A2,intron_variant,,ENST00000504954,;UGT3A2,missense_variant,p.Leu7Pro,ENST00000504685,;	G
TCGA-44-6145-01A-11D-1753-08	UGT2B7	0	.	GRCh37	4	69962328	69962328	+	Silent	SNP	A	A	T	.	.	LUAD		TCGA-44-6145-01A-11D-1753-08	TCGA-44-6145-10A-01D-1753-08	A	A	.	.	.	.	.	.	.	.	.	.	.	.	.	.	.	c.90A>T	p.%3D	p.A30A	ENST00000305231	1/6	121	104	17	86	86	0	UGT2B7,synonymous_variant,p.%3D,ENST00000305231,;UGT2B7,synonymous_variant,p.%3D,ENST00000508661,;UGT2B7,intron_variant,,ENST00000502942,;UGT2B7,intron_variant,,ENST00000509763,;	T
TCGA-44-6776-01A-11D-1855-08	UGT3A1	0	.	GRCh37	5	35957471	35957471	+	Silent	SNP	C	C	A	.	.	LUAD		TCGA-44-6776-01A-11D-1855-08	TCGA-44-6776-10A-01D-1855-08	C	C	.	.	.	.	.	.	.	.	.	.	.	.	.	.	.	c.894G>T	p.%3D	p.V298V	ENST00000274278	5/7	62	44	17	63	63	0	UGT3A1,synonymous_variant,p.%3D,ENST00000274278,;UGT3A1,synonymous_variant,p.%3D,ENST00000507113,;UGT3A1,synonymous_variant,p.%3D,ENST00000503189,;UGT3A1,downstream_gene_variant,,ENST00000333811,;UGT3A1,non_coding_transcript_exon_variant,,ENST00000513233,;UGT3A1,3_prime_UTR_variant,,ENST00000515801,;	A
TCGA-44-6777-01A-11D-1855-08	UGT1A4	0	.	GRCh37	2	234681013	234681013	+	Silent	SNP	C	C	G	rs769720139	.	LUAD		TCGA-44-6777-01A-11D-1855-08	TCGA-44-6777-10A-01D-1855-08	C	C	.	.	.	.	.	.	.	.	.	.	.	.	.	.	.	c.1413C>G	p.%3D	p.G471G	ENST00000373409	5/5	137	126	10	156	156	0	UGT1A4,synonymous_variant,p.%3D,ENST00000373409,;UGT1A6,synonymous_variant,p.%3D,ENST00000305139,;UGT1A3,synonymous_variant,p.%3D,ENST00000482026,;UGT1A6,synonymous_variant,p.%3D,ENST00000373424,;UGT1A8,synonymous_variant,p.%3D,ENST00000608383,;UGT1A8,synonymous_variant,p.%3D,ENST00000608381,;UGT1A7,synonymous_variant,p.%3D,ENST00000373426,;UGT1A8,synonymous_variant,p.%3D,ENST00000609637,;UGT1A8,…	G
TCGA-44-6777-01A-11D-1855-08	UGT2B15	0	.	GRCh37	4	69512760	69512760	+	3'UTR	SNP	C	C	T	novel	.	LUAD		TCGA-44-6777-01A-11D-1855-08	TCGA-44-6777-10A-01D-1855-08	C	C	.	.	.	.	.	.	.	.	.	.	.	.	.	.	.	c.*62G>A	.	.	ENST00000338206	6/6	92	78	13	106	106	0	UGT2B15,3_prime_UTR_variant,,ENST00000338206,;	T
TCGA-44-6777-01A-11D-1855-08	UGT2B15	0	.	GRCh37	4	69512806	69512806	+	3'UTR	SNP	C	C	T	rs753306291	.	LUAD		TCGA-44-6777-01A-11D-1855-08	TCGA-44-6777-10A-01D-1855-08	C	C	.	.	.	.	.	.	.	.	.	.	.	.	.	.	.	c.*16G>A	.	.	ENST00000338206	6/6	171	141	29	196	196	0	UGT2B15,3_prime_UTR_variant,,ENST00000338206,;	T
TCGA-44-6777-01A-11D-1855-08	UGT2B17	0	.	GRCh37	4	69416468	69416468	+	Missense_Mutation	SNP	G	G	T	novel	.	LUAD		TCGA-44-6777-01A-11D-1855-08	TCGA-44-6777-10A-01D-1855-08	G	G	.	.	.	.	.	.	.	.	.	.	.	.	.	.	.	c.1240C>A	p.Leu414Ile	p.L414I	ENST00000317746	5/6	244	200	43	226	225	1	UGT2B17,missense_variant,p.Leu414Ile,ENST00000317746,;	T
TCGA-44-6777-01A-11D-1855-08	UGT2B17	0	.	GRCh37	4	69416469	69416469	+	Silent	SNP	G	G	T	novel	.	LUAD		TCGA-44-6777-01A-11D-1855-08	TCGA-44-6777-10A-01D-1855-08	G	G	.	.	.	.	.	.	.	.	.	.	.	.	.	.	.	c.1239C>A	p.%3D	p.A413A	ENST00000317746	5/6	263	218	45	262	262	0	UGT2B17,synonymous_variant,p.%3D,ENST00000317746,;	T
TCGA-44-6777-01A-11D-1855-08	UGT2B7	0	.	GRCh37	4	69962775	69962775	+	Silent	SNP	T	T	A	rs372601149	.	LUAD		TCGA-44-6777-01A-11D-1855-08	TCGA-44-6777-10A-01D-1855-08	T	T	.	.	.	.	.	.	.	.	.	.	.	.	.	.	.	c.537T>A	p.%3D	p.T179T	ENST00000305231	1/6	188	151	37	188	188	0	UGT2B7,synonymous_variant,p.%3D,ENST00000305231,;UGT2B7,synonymous_variant,p.%3D,ENST00000508661,;UGT2B7,intron_variant,,ENST00000502942,;UGT2B7,intron_variant,,ENST00000509763,;	A
TCGA-44-6778-01A-11D-1855-08	UGT2B11	0	.	GRCh37	4	70080232	70080232	+	Missense_Mutation	SNP	G	G	T	rs188477794	.	LUAD		TCGA-44-6778-01A-11D-1855-08	TCGA-44-6778-10A-01D-1855-08	G	G	.	.	.	.	.	.	.	.	.	.	.	.	.	.	.	c.209C>A	p.Ser70Tyr	p.S70Y	ENST00000446444	1/6	188	163	24	215	214	1	UGT2B11,missense_variant,p.Ser70Tyr,ENST00000446444,;RP11-704M14.1,non_coding_transcript_exon_variant,,ENST00000505646,;RP11-704M14.1,downstream_gene_variant,,ENST00000504301,;RP11-704M14.2,downstream_gene_variant,,ENST00000514003,;	T
TCGA-44-6778-01A-11D-1855-08	UGT2B15	0	.	GRCh37	4	69536220	69536220	+	Missense_Mutation	SNP	C	C	T	.	.	LUAD		TCGA-44-6778-01A-11D-1855-08	TCGA-44-6778-10A-01D-1855-08	C	C	.	.	.	.	.	.	.	.	.	.	.	.	.	.	.	c.117G>A	p.Met39Ile	p.M39I	ENST00000338206	1/6	653	519	134	495	495	0	UGT2B15,missense_variant,p.Met39Ile,ENST00000338206,;	T
TCGA-44-7659-01A-11D-2063-08	UGT2B4	0	.	GRCh37	4	70351130	70351130	+	Missense_Mutation	SNP	C	C	A	.	.	LUAD		TCGA-44-7659-01A-11D-2063-08	TCGA-44-7659-10A-01D-2063-08	C	C	.	.	.	.	.	.	.	.	.	.	.	.	.	.	.	c.1106G>T	p.Arg369Ile	p.R369I	ENST00000305107	5/6	211	160	51	180	180	0	UGT2B4,missense_variant,p.Arg369Ile,ENST00000305107,;UGT2B4,missense_variant,p.Arg233Ile,ENST00000381096,;UGT2B4,intron_variant,,ENST00000512583,;UGT2B4,non_coding_transcript_exon_variant,,ENST00000502655,;UGT2B4,intron_variant,,ENST00000506580,;UGT2B4,downstream_gene_variant,,ENST00000503836,;	A
TCGA-44-7661-01A-11D-2063-08	UGT2B11	0	.	GRCh37	4	70070188	70070188	+	Missense_Mutation	SNP	C	C	A	.	.	LUAD		TCGA-44-7661-01A-11D-2063-08	TCGA-44-7661-10A-01D-2063-08	C	C	.	.	.	.	.	.	.	.	.	.	.	.	.	.	.	c.1270G>T	p.Asp424Tyr	p.D424Y	ENST00000446444	5/6	198	174	23	155	154	1	UGT2B11,missense_variant,p.Asp424Tyr,ENST00000446444,;RP11-704M14.1,intron_variant,,ENST00000504301,;RP11-704M14.1,intron_variant,,ENST00000505646,;UGT2B11,non_coding_transcript_exon_variant,,ENST00000513315,;	A
TCGA-44-7662-01A-11D-2063-08	UGT1A10	0	.	GRCh37	2	234545480	234545480	+	Silent	SNP	T	T	C	.	.	LUAD		TCGA-44-7662-01A-11D-2063-08	TCGA-44-7662-10A-01D-2063-08	T	T	.	.	.	.	.	.	.	.	.	.	.	.	.	.	.	c.312T>C	p.%3D	p.S104S	ENST00000344644	1/5	142	119	23	114	114	0	UGT1A10,synonymous_variant,p.%3D,ENST00000373445,;UGT1A10,synonymous_variant,p.%3D,ENST00000344644,;UGT1A8,intron_variant,,ENST00000373450,;	C
TCGA-44-7662-01A-11D-2063-08	UGT2B11	0	.	GRCh37	4	70066400	70066400	+	Missense_Mutation	SNP	G	G	A	.	.	LUAD		TCGA-44-7662-01A-11D-2063-08	TCGA-44-7662-10A-01D-2063-08	G	G	.	.	.	.	.	.	.	.	.	.	.	.	.	.	.	c.1348C>T	p.His450Tyr	p.H450Y	ENST00000446444	6/6	120	91	28	60	60	0	UGT2B11,missense_variant,p.His450Tyr,ENST00000446444,;RP11-704M14.1,intron_variant,,ENST00000504301,;RP11-704M14.1,intron_variant,,ENST00000505646,;UGT2B11,downstream_gene_variant,,ENST00000513315,;	A
TCGA-44-7669-01A-21D-2063-08	UGT2A1	0	.	GRCh37	4	70461988	70461988	+	Missense_Mutation	SNP	G	G	A	novel	.	LUAD		TCGA-44-7669-01A-21D-2063-08	TCGA-44-7669-10A-01D-2063-08	G	G	.	.	.	.	.	.	.	.	.	.	.	.	.	.	.	c.976C>T	p.Leu326Phe	p.L326F	ENST00000503640	3/6	60	46	14	77	77	0	UGT2A1,missense_variant,p.Leu326Phe,ENST00000503640,;UGT2A2,missense_variant,p.Leu335Phe,ENST00000457664,;UGT2A2,missense_variant,p.Leu336Phe,ENST00000604629,;UGT2A1,intron_variant,,ENST00000286604,;UGT2A1,intron_variant,,ENST00000514019,;UGT2A2,intron_variant,,ENST00000604021,;UGT2A1,intron_variant,,ENST00000512704,;UGT2A1,intron_variant,,ENST00000502343,;UGT2A1,downstream_gene_variant,,ENST0000…	A
TCGA-44-7669-01A-21D-2063-08	UGT2B7	0	.	GRCh37	4	69962511	69962511	+	Missense_Mutation	SNP	G	G	T	rs370956653	.	LUAD		TCGA-44-7669-01A-21D-2063-08	TCGA-44-7669-10A-01D-2063-08	G	G	.	.	.	.	.	.	.	.	.	.	.	.	.	.	.	c.273G>T	p.Met91Ile	p.M91I	ENST00000305231	1/6	61	50	11	56	56	0	UGT2B7,missense_variant,p.Met91Ile,ENST00000305231,;UGT2B7,missense_variant,p.Met91Ile,ENST00000508661,;UGT2B7,intron_variant,,ENST00000502942,;UGT2B7,intron_variant,,ENST00000509763,;	T
TCGA-44-7670-01A-11D-2063-08	UGT1A7	0	.	GRCh37	2	234591295	234591295	+	Missense_Mutation	SNP	C	C	T	rs141296723	.	LUAD		TCGA-44-7670-01A-11D-2063-08	TCGA-44-7670-10A-01D-2063-08	C	C	.	.	.	.	.	.	.	.	.	.	.	.	.	.	.	c.712C>T	p.Pro238Ser	p.P238S	ENST00000373426	1/5	343	273	70	434	434	0	UGT1A7,missense_variant,p.Pro238Ser,ENST00000373426,;UGT1A7,missense_variant,p.Pro95Ser,ENST00000485022,;UGT1A10,intron_variant,,ENST00000373445,;UGT1A10,intron_variant,,ENST00000344644,;UGT1A8,intron_variant,,ENST00000373450,;UGT1A8,intron_variant,,ENST00000609637,;UGT1A9,intron_variant,,ENST00000354728,;	T
TCGA-44-8117-01A-11D-2238-08	UGT2A1	0	.	GRCh37	4	70513265	70513265	+	Missense_Mutation	SNP	C	C	A	.	.	LUAD		TCGA-44-8117-01A-11D-2238-08	TCGA-44-8117-10A-01D-2238-08	C	C	.	.	.	.	.	.	.	.	.	.	.	.	.	.	.	c.98G>T	p.Trp33Leu	p.W33L	ENST00000514019	2/7	40	31	8	34	34	0	UGT2A1,missense_variant,p.Trp33Leu,ENST00000505512,;UGT2A1,missense_variant,p.Trp33Leu,ENST00000286604,;UGT2A1,missense_variant,p.Trp33Leu,ENST00000514019,;UGT2A1,missense_variant,p.Trp33Leu,ENST00000512704,;UGT2A1,missense_variant,p.Trp33Leu,ENST00000503640,;	A
TCGA-44-8119-01A-11D-2238-08	UGT1A5	0	.	GRCh37	2	234622156	234622156	+	Missense_Mutation	SNP	G	G	T	.	.	LUAD		TCGA-44-8119-01A-11D-2238-08	TCGA-44-8119-10A-01D-2238-08	G	G	.	.	.	.	.	.	.	.	.	.	.	.	.	.	.	c.519G>T	p.Leu173Phe	p.L173F	ENST00000373414	1/5	128	100	27	215	215	0	UGT1A8,missense_variant,p.Leu173Phe,ENST00000608381,;UGT1A5,missense_variant,p.Leu173Phe,ENST00000373414,;UGT1A10,intron_variant,,ENST00000373445,;UGT1A6,intron_variant,,ENST00000305139,;UGT1A6,intron_variant,,ENST00000373424,;UGT1A7,intron_variant,,ENST00000373426,;UGT1A8,intron_variant,,ENST00000609637,;UGT1A6,intron_variant,,ENST00000406651,;UGT1A10,intron_variant,,ENST00000344644,;UGT1A8,intr…	T
TCGA-44-8119-01A-11D-2238-08	UGT2A1	0	.	GRCh37	4	70512723	70512728	+	In_Frame_Del	DEL	TGAAAT	TGAAAT	-	novel	.	LUAD		TCGA-44-8119-01A-11D-2238-08	TCGA-44-8119-10A-01D-2238-08	TGAAAT	TGAAAT	.	.	.	.	.	.	.	.	.	.	.	.	.	.	.	c.635_640delATTTCA	p.Asn212_Phe213del	p.N212_F213del	ENST00000514019	2/7	72	38	34	60	60	0	UGT2A1,inframe_deletion,p.Asn212_Phe213del,ENST00000286604,;UGT2A1,inframe_deletion,p.Asn212_Phe213del,ENST00000514019,;UGT2A1,inframe_deletion,p.Asn212_Phe213del,ENST00000512704,;UGT2A1,inframe_deletion,p.Asn212_Phe213del,ENST00000503640,;UGT2A1,downstream_gene_variant,,ENST00000505512,;	-
TCGA-44-8119-01A-11D-2238-08	UGT2B28	0	.	GRCh37	4	70155469	70155469	+	Silent	SNP	A	A	G	.	.	LUAD		TCGA-44-8119-01A-11D-2238-08	TCGA-44-8119-10A-01D-2238-08	A	A	.	.	.	.	.	.	.	.	.	.	.	.	.	.	.	c.1089A>G	p.%3D	p.L363L	ENST00000335568	4/6	78	50	27	67	67	0	UGT2B28,synonymous_variant,p.%3D,ENST00000335568,;UGT2B28,intron_variant,,ENST00000511240,;	G
TCGA-44-8119-01A-11D-2238-08	UGT8	0	.	GRCh37	4	115585262	115585262	+	Missense_Mutation	SNP	C	C	A	.	.	LUAD		TCGA-44-8119-01A-11D-2238-08	TCGA-44-8119-10A-01D-2238-08	C	C	.	.	.	.	.	.	.	.	.	.	.	.	.	.	.	c.934C>A	p.Leu312Met	p.L312M	ENST00000310836	3/6	97	36	60	115	115	0	UGT8,missense_variant,p.Leu312Met,ENST00000310836,;UGT8,missense_variant,p.Leu312Met,ENST00000394511,;	A
TCGA-44-A4SS-01A-11D-A24P-08	UGT3A2	0	.	GRCh37	5	36049053	36049053	+	Silent	SNP	G	G	A	novel	.	LUAD		TCGA-44-A4SS-01A-11D-A24P-08	TCGA-44-A4SS-10A-01D-A24P-08	G	G	.	.	.	.	.	.	.	.	.	.	.	.	.	.	.	c.781C>T	p.%3D	p.L261L	ENST00000282507	4/7	106	93	13	92	92	0	UGT3A2,synonymous_variant,p.%3D,ENST00000513300,;UGT3A2,synonymous_variant,p.%3D,ENST00000282507,;UGT3A2,intron_variant,,ENST00000545528,;UGT3A2,downstream_gene_variant,,ENST00000515131,;UGT3A2,intron_variant,,ENST00000504954,;UGT3A2,intron_variant,,ENST00000504685,;	A
TCGA-44-A4SU-01A-11D-A24P-08	UGT2B15	0	.	GRCh37	4	69520810	69520810	+	Intron	SNP	T	T	A	novel	.	LUAD		TCGA-44-A4SU-01A-11D-A24P-08	TCGA-44-A4SU-10A-01D-A24P-08	T	T	.	.	.	.	.	.	.	.	.	.	.	.	.	.	.	c.1093+3A>T	.	.	ENST00000338206	.	121	69	51	143	143	0	UGT2B15,splice_region_variant,,ENST00000338206,;	A
TCGA-49-4488-01A-01D-1753-08	UGT1A6	0	.	GRCh37	2	234602162	234602162	+	Missense_Mutation	SNP	T	T	A	.	.	LUAD		TCGA-49-4488-01A-01D-1753-08	TCGA-49-4488-11A-01D-1753-08	T	T	.	.	.	.	.	.	.	.	.	.	.	.	.	.	.	c.512T>A	p.Phe171Tyr	p.F171Y	ENST00000305139	1/5	183	135	48	186	185	1	UGT1A6,missense_variant,p.Phe171Tyr,ENST00000441351,;UGT1A6,missense_variant,p.Phe171Tyr,ENST00000305139,;UGT1A10,intron_variant,,ENST00000373445,;UGT1A6,intron_variant,,ENST00000373424,;UGT1A7,intron_variant,,ENST00000373426,;UGT1A8,intron_variant,,ENST00000609637,;UGT1A10,intron_variant,,ENST00000344644,;UGT1A8,intron_variant,,ENST00000373450,;UGT1A9,intron_variant,,ENST00000354728,;UGT1A7,down…	A
TCGA-49-4488-01A-01D-1753-08	UGT2B15	0	.	GRCh37	4	69513061	69513061	+	Missense_Mutation	SNP	C	C	A	.	.	LUAD		TCGA-49-4488-01A-01D-1753-08	TCGA-49-4488-11A-01D-1753-08	C	C	.	.	.	.	.	.	.	.	.	.	.	.	.	.	.	c.1354G>T	p.Asp452Tyr	p.D452Y	ENST00000338206	6/6	125	90	34	128	128	0	UGT2B15,missense_variant,p.Asp452Tyr,ENST00000338206,;	A
TCGA-49-4488-01A-01D-1753-08	UGT2B4	0	.	GRCh37	4	70361499	70361499	+	Silent	SNP	C	C	A	.	.	LUAD		TCGA-49-4488-01A-01D-1753-08	TCGA-49-4488-11A-01D-1753-08	C	C	.	.	.	.	.	.	.	.	.	.	.	.	.	.	.	c.81G>T	p.%3D	p.L27L	ENST00000305107	1/6	150	110	39	197	196	1	UGT2B4,synonymous_variant,p.%3D,ENST00000510114,;UGT2B4,synonymous_variant,p.%3D,ENST00000305107,;UGT2B4,synonymous_variant,p.%3D,ENST00000512583,;UGT2B4,intron_variant,,ENST00000381096,;UGT2B4,non_coding_transcript_exon_variant,,ENST00000506580,;UGT2B4,intron_variant,,ENST00000503836,;UGT2B4,intron_variant,,ENST00000502655,;	A
TCGA-49-4501-01A-01D-1265-08	UGT3A1	0	.	GRCh37	5	35954373	35954373	+	Missense_Mutation	SNP	C	C	A	novel	.	LUAD		TCGA-49-4501-01A-01D-1265-08	TCGA-49-4501-11A-01D-1265-08	C	C	.	.	.	.	.	.	.	.	.	.	.	.	.	.	.	c.1503G>T	p.Trp501Cys	p.W501C	ENST00000274278	7/7	52	45	6	24	24	0	UGT3A1,missense_variant,p.Trp501Cys,ENST00000274278,;UGT3A1,downstream_gene_variant,,ENST00000507113,;UGT3A1,downstream_gene_variant,,ENST00000503189,;UGT3A1,downstream_gene_variant,,ENST00000513233,;UGT3A1,3_prime_UTR_variant,,ENST00000515801,;	A
TCGA-49-4505-01A-01D-1931-08	UGT2B17	0	.	GRCh37	4	69433722	69433722	+	Missense_Mutation	SNP	G	G	T	novel	.	LUAD		TCGA-49-4505-01A-01D-1931-08	TCGA-49-4505-11A-01D-1265-08	G	G	.	.	.	.	.	.	.	.	.	.	.	.	.	.	.	c.481C>A	p.Leu161Met	p.L161M	ENST00000317746	1/6	587	500	87	380	380	0	UGT2B17,missense_variant,p.Leu161Met,ENST00000317746,;	T
TCGA-49-4505-01A-01D-1931-08	UGT3A1	0	.	GRCh37	5	35954564	35954564	+	Missense_Mutation	SNP	C	C	A	novel	.	LUAD		TCGA-49-4505-01A-01D-1931-08	TCGA-49-4505-11A-01D-1265-08	C	C	.	.	.	.	.	.	.	.	.	.	.	.	.	.	.	c.1312G>T	p.Val438Leu	p.V438L	ENST00000274278	7/7	116	72	44	23	23	0	UGT3A1,missense_variant,p.Val438Leu,ENST00000274278,;UGT3A1,downstream_gene_variant,,ENST00000507113,;UGT3A1,downstream_gene_variant,,ENST00000503189,;UGT3A1,downstream_gene_variant,,ENST00000513233,;UGT3A1,3_prime_UTR_variant,,ENST00000515801,;	A
TCGA-49-6745-01A-11D-1855-08	UGT2B17	0	.	GRCh37	4	69416591	69416591	+	Missense_Mutation	SNP	T	T	A	novel	.	LUAD		TCGA-49-6745-01A-11D-1855-08	TCGA-49-6745-11A-01D-1855-08	T	T	.	.	.	.	.	.	.	.	.	.	.	.	.	.	.	c.1117A>T	p.Ile373Leu	p.I373L	ENST00000317746	5/6	199	161	37	251	250	1	UGT2B17,missense_variant,p.Ile373Leu,ENST00000317746,;	A
TCGA-49-6767-01A-11D-1855-08	UGT2B28	0	.	GRCh37	4	70146539	70146539	+	Missense_Mutation	SNP	A	A	T	novel	.	LUAD		TCGA-49-6767-01A-11D-1855-08	TCGA-49-6767-11A-01D-1855-08	A	A	.	.	.	.	.	.	.	.	.	.	.	.	.	.	.	c.321A>T	p.Leu107Phe	p.L107F	ENST00000335568	1/6	169	131	38	213	213	0	UGT2B28,missense_variant,p.Leu107Phe,ENST00000511240,;UGT2B28,missense_variant,p.Leu107Phe,ENST00000335568,;	T
TCGA-49-6767-01A-11D-1855-08	UGT2B28	0	.	GRCh37	4	70146540	70146540	+	Missense_Mutation	SNP	T	T	C	novel	.	LUAD		TCGA-49-6767-01A-11D-1855-08	TCGA-49-6767-11A-01D-1855-08	T	T	.	.	.	.	.	.	.	.	.	.	.	.	.	.	.	c.322T>C	p.Tyr108His	p.Y108H	ENST00000335568	1/6	167	130	36	213	213	0	UGT2B28,missense_variant,p.Tyr108His,ENST00000511240,;UGT2B28,missense_variant,p.Tyr108His,ENST00000335568,;	C
TCGA-49-6767-01A-11D-1855-08	UGT2B4	0	.	GRCh37	4	70352326	70352326	+	Splice_Site	SNP	C	C	G	rs762893810	.	LUAD		TCGA-49-6767-01A-11D-1855-08	TCGA-49-6767-11A-01D-1855-08	C	C	.	.	.	.	.	.	.	.	.	.	.	.	.	.	.	c.1090+1G>C	.	p.X364_splice	ENST00000305107	.	107	95	12	144	144	0	UGT2B4,splice_donor_variant,,ENST00000305107,;UGT2B4,splice_donor_variant,,ENST00000512583,;UGT2B4,splice_donor_variant,,ENST00000381096,;UGT2B4,splice_donor_variant,,ENST00000506580,;UGT2B4,splice_donor_variant,,ENST00000502655,;UGT2B4,downstream_gene_variant,,ENST00000503836,;	G
TCGA-49-AAR0-01A-21D-A397-08	UGT3A1	0	.	GRCh37	5	35991273	35991273	+	Missense_Mutation	SNP	T	T	C	novel	.	LUAD		TCGA-49-AAR0-01A-21D-A397-08	TCGA-49-AAR0-11A-11D-A39A-08	T	T	.	.	.	.	.	.	.	.	.	.	.	.	.	.	.	c.70A>G	p.Lys24Glu	p.K24E	ENST00000274278	1/7	147	104	43	165	165	0	UGT3A1,missense_variant,p.Lys24Glu,ENST00000274278,;UGT3A1,missense_variant,p.Lys24Glu,ENST00000507113,;UGT3A1,missense_variant,p.Lys24Glu,ENST00000503189,;UGT3A1,intron_variant,,ENST00000333811,;UGT3A1,non_coding_transcript_exon_variant,,ENST00000513233,;UGT3A1,missense_variant,p.Lys24Glu,ENST00000515801,;	C
TCGA-49-AAR2-01A-11D-A397-08	UGT2A1	0	.	GRCh37	4	70512987	70512987	+	Missense_Mutation	SNP	A	A	T	novel	.	LUAD		TCGA-49-AAR2-01A-11D-A397-08	TCGA-49-AAR2-11A-11D-A39A-08	A	A	.	.	.	.	.	.	.	.	.	.	.	.	.	.	.	c.376T>A	p.Cys126Ser	p.C126S	ENST00000514019	2/7	83	58	24	94	93	1	UGT2A1,missense_variant,p.Cys126Ser,ENST00000505512,;UGT2A1,missense_variant,p.Cys126Ser,ENST00000286604,;UGT2A1,missense_variant,p.Cys126Ser,ENST00000514019,;UGT2A1,missense_variant,p.Cys126Ser,ENST00000512704,;UGT2A1,missense_variant,p.Cys126Ser,ENST00000503640,;	T
TCGA-49-AAR2-01A-11D-A397-08	UGT2B28	0	.	GRCh37	4	70160401	70160401	+	Nonsense_Mutation	SNP	C	C	A	novel	.	LUAD		TCGA-49-AAR2-01A-11D-A397-08	TCGA-49-AAR2-11A-11D-A39A-08	C	C	.	.	.	.	.	.	.	.	.	.	.	.	.	.	.	c.1464C>A	p.Tyr488Ter	p.Y488*	ENST00000335568	6/6	96	77	18	131	131	0	UGT2B28,stop_gained,p.Tyr488Ter,ENST00000335568,;UGT2B28,3_prime_UTR_variant,,ENST00000511240,;	A
TCGA-49-AAR4-01A-12D-A410-08	UGT2B4	0	.	GRCh37	4	70351080	70351080	+	Missense_Mutation	SNP	G	G	T	novel	.	LUAD		TCGA-49-AAR4-01A-12D-A410-08	TCGA-49-AAR4-11A-11D-A413-08	G	G	.	.	.	.	.	.	.	.	.	.	.	.	.	.	.	c.1156C>A	p.His386Asn	p.H386N	ENST00000305107	5/6	177	166	11	241	241	0	UGT2B4,missense_variant,p.His386Asn,ENST00000305107,;UGT2B4,missense_variant,p.His250Asn,ENST00000381096,;UGT2B4,intron_variant,,ENST00000512583,;UGT2B4,non_coding_transcript_exon_variant,,ENST00000502655,;UGT2B4,intron_variant,,ENST00000506580,;UGT2B4,downstream_gene_variant,,ENST00000503836,;	T
TCGA-49-AAR4-01A-12D-A410-08	UGT3A1	0	.	GRCh37	5	35954408	35954408	+	Missense_Mutation	SNP	C	C	A	novel	.	LUAD		TCGA-49-AAR4-01A-12D-A410-08	TCGA-49-AAR4-11A-11D-A413-08	C	C	.	.	.	.	.	.	.	.	.	.	.	.	.	.	.	c.1468G>T	p.Val490Leu	p.V490L	ENST00000274278	7/7	28	25	3	40	40	0	UGT3A1,missense_variant,p.Val490Leu,ENST00000274278,;UGT3A1,downstream_gene_variant,,ENST00000507113,;UGT3A1,downstream_gene_variant,,ENST00000503189,;UGT3A1,downstream_gene_variant,,ENST00000513233,;UGT3A1,3_prime_UTR_variant,,ENST00000515801,;	A
TCGA-49-AAR9-01A-21D-A410-08	UGT2B10	0	.	GRCh37	4	69687988	69687988	+	Splice_Site	SNP	G	G	A	rs782107811	.	LUAD		TCGA-49-AAR9-01A-21D-A410-08	TCGA-49-AAR9-11A-11D-A413-08	G	G	.	.	.	.	.	.	.	.	.	.	.	.	.	.	.	c.868-1G>A	.	p.X290_splice	ENST00000265403	.	180	167	13	209	209	0	UGT2B10,splice_acceptor_variant,,ENST00000265403,;UGT2B10,splice_acceptor_variant,,ENST00000458688,;	A
TCGA-49-AAR9-01A-21D-A410-08	UGT2B11	0	.	GRCh37	4	70070202	70070202	+	Missense_Mutation	SNP	G	G	T	rs772855784	.	LUAD		TCGA-49-AAR9-01A-21D-A410-08	TCGA-49-AAR9-11A-11D-A413-08	G	G	.	.	.	.	.	.	.	.	.	.	.	.	.	.	.	c.1256C>A	p.Thr419Lys	p.T419K	ENST00000446444	5/6	170	48	122	224	224	0	UGT2B11,missense_variant,p.Thr419Lys,ENST00000446444,;RP11-704M14.1,intron_variant,,ENST00000504301,;RP11-704M14.1,intron_variant,,ENST00000505646,;UGT2B11,non_coding_transcript_exon_variant,,ENST00000513315,;	T
TCGA-49-AAR9-01A-21D-A410-08	UGT2B17	0	.	GRCh37	4	69433504	69433504	+	Missense_Mutation	SNP	C	C	A	novel	.	LUAD		TCGA-49-AAR9-01A-21D-A410-08	TCGA-49-AAR9-11A-11D-A413-08	C	C	.	.	.	.	.	.	.	.	.	.	.	.	.	.	.	c.699G>T	p.Trp233Cys	p.W233C	ENST00000317746	1/6	142	103	38	205	205	0	UGT2B17,missense_variant,p.Trp233Cys,ENST00000317746,;	A
TCGA-49-AARE-01A-11D-A410-08	UGT2A1	0	.	GRCh37	4	70461980	70461980	+	Missense_Mutation	SNP	C	C	A	novel	.	LUAD		TCGA-49-AARE-01A-11D-A410-08	TCGA-49-AARE-11A-11D-A413-08	C	C	.	.	.	.	.	.	.	.	.	.	.	.	.	.	.	c.984G>T	p.Gln328His	p.Q328H	ENST00000503640	3/6	42	38	4	71	70	1	UGT2A1,missense_variant,p.Gln328His,ENST00000503640,;UGT2A2,missense_variant,p.Gln337His,ENST00000457664,;UGT2A2,missense_variant,p.Gln338His,ENST00000604629,;UGT2A1,intron_variant,,ENST00000286604,;UGT2A1,intron_variant,,ENST00000514019,;UGT2A2,intron_variant,,ENST00000604021,;UGT2A1,intron_variant,,ENST00000512704,;UGT2A1,intron_variant,,ENST00000502343,;UGT2A1,downstream_gene_variant,,ENST0000…	A
TCGA-49-AARE-01A-11D-A410-08	UGT2B7	0	.	GRCh37	4	69973971	69973971	+	Missense_Mutation	SNP	G	G	A	rs766047432	.	LUAD		TCGA-49-AARE-01A-11D-A410-08	TCGA-49-AARE-11A-11D-A413-08	G	G	.	.	.	.	.	.	.	.	.	.	.	.	.	.	.	c.1241G>A	p.Arg414Lys	p.R414K	ENST00000305231	5/6	118	75	43	189	189	0	UGT2B7,missense_variant,p.Arg414Lys,ENST00000305231,;UGT2B7,intron_variant,,ENST00000508661,;UGT2B7,downstream_gene_variant,,ENST00000502942,;UGT2B7,intron_variant,,ENST00000509763,;	A
TCGA-49-AARE-01A-11D-A410-08	UGT3A2	0	.	GRCh37	5	36039667	36039667	+	Nonsense_Mutation	SNP	C	C	T	novel	.	LUAD		TCGA-49-AARE-01A-11D-A410-08	TCGA-49-AARE-11A-11D-A413-08	C	C	.	.	.	.	.	.	.	.	.	.	.	.	.	.	.	c.987G>A	p.Trp329Ter	p.W329*	ENST00000282507	5/7	112	54	58	99	97	2	UGT3A2,stop_gained,p.Trp295Ter,ENST00000513300,;UGT3A2,stop_gained,p.Trp27Ter,ENST00000545528,;UGT3A2,stop_gained,p.Trp329Ter,ENST00000282507,;UGT3A2,downstream_gene_variant,,ENST00000504954,;UGT3A2,3_prime_UTR_variant,,ENST00000504685,;	T
TCGA-49-AARN-01A-21D-A410-08	UGT1A4	0	.	GRCh37	2	234628144	234628144	+	Silent	SNP	T	T	G	novel	.	LUAD		TCGA-49-AARN-01A-21D-A410-08	TCGA-49-AARN-11A-11D-A413-08	T	T	.	.	.	.	.	.	.	.	.	.	.	.	.	.	.	c.678T>G	p.%3D	p.T226T	ENST00000373409	1/5	195	185	10	142	142	0	UGT1A4,synonymous_variant,p.%3D,ENST00000373409,;UGT1A10,intron_variant,,ENST00000373445,;UGT1A6,intron_variant,,ENST00000305139,;UGT1A6,intron_variant,,ENST00000373424,;UGT1A8,intron_variant,,ENST00000608381,;UGT1A7,intron_variant,,ENST00000373426,;UGT1A8,intron_variant,,ENST00000609637,;UGT1A5,intron_variant,,ENST00000373414,;UGT1A6,intron_variant,,ENST00000406651,;UGT1A10,intron_variant,,ENST0…	G
TCGA-49-AARO-01A-12D-A410-08	UGT2A3	0	.	GRCh37	4	69796292	69796292	+	Missense_Mutation	SNP	C	C	A	rs755757304	.	LUAD		TCGA-49-AARO-01A-12D-A410-08	TCGA-49-AARO-11A-11D-A413-08	C	C	.	.	.	.	.	.	.	.	.	.	.	.	.	.	.	c.1276G>T	p.Ala426Ser	p.A426S	ENST00000251566	5/6	122	111	11	111	111	0	UGT2A3,missense_variant,p.Ala426Ser,ENST00000251566,;UGT2A3,missense_variant,p.Ala137Ser,ENST00000420231,;UGT2A3,3_prime_UTR_variant,,ENST00000503012,;	A
TCGA-49-AARO-01A-12D-A410-08	UGT2B28	0	.	GRCh37	4	70146262	70146262	+	Missense_Mutation	SNP	G	G	T	novel	.	LUAD		TCGA-49-AARO-01A-12D-A410-08	TCGA-49-AARO-11A-11D-A413-08	G	G	.	.	.	.	.	.	.	.	.	.	.	.	.	.	.	c.44G>T	p.Gly15Val	p.G15V	ENST00000335568	1/6	64	47	16	101	101	0	UGT2B28,missense_variant,p.Gly15Val,ENST00000511240,;UGT2B28,missense_variant,p.Gly15Val,ENST00000335568,;	T
TCGA-49-AARQ-01A-11D-A410-08	UGT2A3	0	.	GRCh37	4	69811143	69811143	+	Missense_Mutation	SNP	C	C	G	novel	.	LUAD		TCGA-49-AARQ-01A-11D-A410-08	TCGA-49-AARQ-11A-21D-A413-08	C	C	.	.	.	.	.	.	.	.	.	.	.	.	.	.	.	c.745G>C	p.Gly249Arg	p.G249R	ENST00000251566	2/6	35	16	19	105	105	0	UGT2A3,missense_variant,p.Gly249Arg,ENST00000251566,;UGT2A3,5_prime_UTR_variant,,ENST00000420231,;UGT2A3,missense_variant,p.Gly115Arg,ENST00000503012,;	G
TCGA-49-AARQ-01A-11D-A410-08	UGT2B28	0	.	GRCh37	4	70156383	70156383	+	Missense_Mutation	SNP	C	C	G	novel	.	LUAD		TCGA-49-AARQ-01A-11D-A410-08	TCGA-49-AARQ-11A-21D-A413-08	C	C	.	.	.	.	.	.	.	.	.	.	.	.	.	.	.	c.1164C>G	p.Ile388Met	p.I388M	ENST00000335568	5/6	160	65	94	317	316	1	UGT2B28,missense_variant,p.Ile388Met,ENST00000335568,;UGT2B28,intron_variant,,ENST00000511240,;	G
TCGA-49-AARQ-01A-11D-A410-08	UGT3A1	0	.	GRCh37	5	35965954	35965954	+	Missense_Mutation	SNP	C	C	G	novel	.	LUAD		TCGA-49-AARQ-01A-11D-A410-08	TCGA-49-AARQ-11A-21D-A413-08	C	C	.	.	.	.	.	.	.	.	.	.	.	.	.	.	.	c.377G>C	p.Ser126Thr	p.S126T	ENST00000274278	4/7	58	41	17	85	85	0	UGT3A1,missense_variant,p.Ser126Thr,ENST00000274278,;UGT3A1,missense_variant,p.Ser92Thr,ENST00000507113,;UGT3A1,missense_variant,p.Ser72Thr,ENST00000333811,;UGT3A1,missense_variant,p.Ser126Thr,ENST00000503189,;UGT3A1,intron_variant,,ENST00000513233,;UGT3A1,3_prime_UTR_variant,,ENST00000515801,;	G
TCGA-50-5049-01A-01D-1625-08	UGT1A7	0	.	GRCh37	2	234591014	234591014	+	Missense_Mutation	SNP	C	C	G	.	.	LUAD		TCGA-50-5049-01A-01D-1625-08	TCGA-50-5049-10A-01D-1625-08	C	C	.	.	.	.	.	.	.	.	.	.	.	.	.	.	.	c.431C>G	p.Ala144Gly	p.A144G	ENST00000373426	1/5	126	113	13	129	129	0	UGT1A7,missense_variant,p.Ala144Gly,ENST00000373426,;UGT1A7,coding_sequence_variant,p.%3D,ENST00000485022,;UGT1A10,intron_variant,,ENST00000373445,;UGT1A10,intron_variant,,ENST00000344644,;UGT1A8,intron_variant,,ENST00000373450,;UGT1A8,intron_variant,,ENST00000609637,;UGT1A9,intron_variant,,ENST00000354728,;	G
TCGA-50-5049-01A-01D-1625-08	UGT3A2	0	.	GRCh37	5	36037999	36037999	+	Missense_Mutation	SNP	C	C	A	.	.	LUAD		TCGA-50-5049-01A-01D-1625-08	TCGA-50-5049-10A-01D-1625-08	C	C	.	.	.	.	.	.	.	.	.	.	.	.	.	.	.	c.1195G>T	p.Val399Phe	p.V399F	ENST00000282507	6/7	103	90	13	130	130	0	UGT3A2,missense_variant,p.Val365Phe,ENST00000513300,;UGT3A2,missense_variant,p.Val97Phe,ENST00000545528,;UGT3A2,missense_variant,p.Val399Phe,ENST00000282507,;UGT3A2,downstream_gene_variant,,ENST00000504954,;UGT3A2,3_prime_UTR_variant,,ENST00000504685,;	A
TCGA-50-5055-01A-01D-1625-08	UGT2B7	0	.	GRCh37	4	69978332	69978332	+	Missense_Mutation	SNP	T	T	G	.	.	LUAD		TCGA-50-5055-01A-01D-1625-08	TCGA-50-5055-10A-01D-1625-08	T	T	.	.	.	.	.	.	.	.	.	.	.	.	.	.	.	c.1468T>G	p.Ser490Ala	p.S490A	ENST00000305231	6/6	156	149	7	191	191	0	UGT2B7,missense_variant,p.Ser490Ala,ENST00000305231,;UGT2B7,3_prime_UTR_variant,,ENST00000508661,;UGT2B7,downstream_gene_variant,,ENST00000502942,;UGT2B7,downstream_gene_variant,,ENST00000509763,;	G
TCGA-50-5930-01A-11D-1753-08	UGT2B10	0	.	GRCh37	4	69693235	69693235	+	Missense_Mutation	SNP	A	A	T	.	.	LUAD		TCGA-50-5930-01A-11D-1753-08	TCGA-50-5930-11A-01D-1753-08	A	A	.	.	.	.	.	.	.	.	.	.	.	.	.	.	.	c.1276A>T	p.Asn426Tyr	p.N426Y	ENST00000265403	5/6	321	256	65	375	375	0	UGT2B10,missense_variant,p.Asn426Tyr,ENST00000265403,;UGT2B10,missense_variant,p.Asn342Tyr,ENST00000458688,;	T
TCGA-50-5930-01A-11D-1753-08	UGT8	0	.	GRCh37	4	115597124	115597124	+	Missense_Mutation	SNP	C	C	G	.	.	LUAD		TCGA-50-5930-01A-11D-1753-08	TCGA-50-5930-11A-01D-1753-08	C	C	.	.	.	.	.	.	.	.	.	.	.	.	.	.	.	c.1306C>G	p.Gln436Glu	p.Q436E	ENST00000310836	6/6	78	50	28	131	131	0	UGT8,missense_variant,p.Gln436Glu,ENST00000310836,;UGT8,missense_variant,p.Gln436Glu,ENST00000394511,;	G
TCGA-50-5932-01A-11D-1753-08	UGT2B4	0	.	GRCh37	4	70361157	70361157	+	Missense_Mutation	SNP	C	C	A	.	.	LUAD		TCGA-50-5932-01A-11D-1753-08	TCGA-50-5932-11A-01D-1753-08	C	C	.	.	.	.	.	.	.	.	.	.	.	.	.	.	.	c.423G>T	p.Gln141His	p.Q141H	ENST00000305107	1/6	22	15	7	23	23	0	UGT2B4,missense_variant,p.Gln141His,ENST00000305107,;UGT2B4,missense_variant,p.Gln141His,ENST00000512583,;UGT2B4,intron_variant,,ENST00000381096,;UGT2B4,downstream_gene_variant,,ENST00000510114,;UGT2B4,non_coding_transcript_exon_variant,,ENST00000506580,;UGT2B4,intron_variant,,ENST00000503836,;UGT2B4,intron_variant,,ENST00000502655,;	A
TCGA-50-5933-01A-11D-1753-08	UGT2A3	0	.	GRCh37	4	69795752	69795752	+	Missense_Mutation	SNP	G	G	T	.	.	LUAD		TCGA-50-5933-01A-11D-1753-08	TCGA-50-5933-11A-01D-1753-08	G	G	.	.	.	.	.	.	.	.	.	.	.	.	.	.	.	c.1363C>A	p.Leu455Ile	p.L455I	ENST00000251566	6/6	117	101	16	133	133	0	UGT2A3,missense_variant,p.Leu455Ile,ENST00000251566,;UGT2A3,missense_variant,p.Leu166Ile,ENST00000420231,;UGT2A3,3_prime_UTR_variant,,ENST00000503012,;	T
TCGA-50-5933-01A-11D-1753-08	UGT2A3	0	.	GRCh37	4	69817245	69817245	+	Silent	SNP	A	A	G	.	.	LUAD		TCGA-50-5933-01A-11D-1753-08	TCGA-50-5933-11A-01D-1753-08	A	A	.	.	.	.	.	.	.	.	.	.	.	.	.	.	.	c.234T>C	p.%3D	p.H78H	ENST00000251566	1/6	87	77	10	102	102	0	UGT2A3,synonymous_variant,p.%3D,ENST00000251566,;UGT2A3,upstream_gene_variant,,ENST00000420231,;UGT2A3,upstream_gene_variant,,ENST00000503012,;	G
TCGA-50-5933-01A-11D-1753-08	UGT2B28	0	.	GRCh37	4	70152549	70152549	+	Missense_Mutation	SNP	C	C	A	rs144043239	.	LUAD		TCGA-50-5933-01A-11D-1753-08	TCGA-50-5933-11A-01D-1753-08	C	C	.	.	.	.	.	.	.	.	.	.	.	.	.	.	.	c.950C>A	p.Thr317Lys	p.T317K	ENST00000335568	3/6	118	105	12	103	103	0	UGT2B28,missense_variant,p.Thr317Lys,ENST00000511240,;UGT2B28,missense_variant,p.Thr317Lys,ENST00000335568,;	A
TCGA-50-5936-01A-11D-1625-08	UGT3A1	0	.	GRCh37	5	35954243	35954243	+	3'UTR	SNP	G	G	C	novel	.	LUAD		TCGA-50-5936-01A-11D-1625-08	TCGA-50-5936-11A-01D-1625-08	G	G	.	.	.	.	.	.	.	.	.	.	.	.	.	.	.	c.*61C>G	.	.	ENST00000274278	7/7	20	16	4	26	26	0	UGT3A1,3_prime_UTR_variant,,ENST00000274278,;UGT3A1,downstream_gene_variant,,ENST00000507113,;UGT3A1,downstream_gene_variant,,ENST00000503189,;UGT3A1,downstream_gene_variant,,ENST00000513233,;UGT3A1,3_prime_UTR_variant,,ENST00000515801,;	C
TCGA-50-5936-01A-11D-1625-08	UGT3A1	0	.	GRCh37	5	35954244	35954244	+	3'UTR	SNP	G	G	T	novel	.	LUAD		TCGA-50-5936-01A-11D-1625-08	TCGA-50-5936-11A-01D-1625-08	G	G	.	.	.	.	.	.	.	.	.	.	.	.	.	.	.	c.*60C>A	.	.	ENST00000274278	7/7	21	16	5	28	28	0	UGT3A1,3_prime_UTR_variant,,ENST00000274278,;UGT3A1,downstream_gene_variant,,ENST00000507113,;UGT3A1,downstream_gene_variant,,ENST00000503189,;UGT3A1,downstream_gene_variant,,ENST00000513233,;UGT3A1,3_prime_UTR_variant,,ENST00000515801,;	T
TCGA-50-5941-01A-11D-1753-08	UGT2B17	0	.	GRCh37	4	69416514	69416514	+	Silent	SNP	C	C	A	rs777284286	.	LUAD		TCGA-50-5941-01A-11D-1753-08	TCGA-50-5941-10A-01D-1753-08	C	C	.	.	.	.	.	.	.	.	.	.	.	.	.	.	.	c.1194G>T	p.%3D	p.A398A	ENST00000317746	5/6	159	137	22	158	158	0	UGT2B17,synonymous_variant,p.%3D,ENST00000317746,;	A
TCGA-50-6590-01A-12D-1855-08	UGT2B4	0	.	GRCh37	4	70359449	70359449	+	Nonsense_Mutation	SNP	C	C	A	novel	.	LUAD		TCGA-50-6590-01A-12D-1855-08	TCGA-50-6590-11A-01D-1855-08	C	C	.	.	.	.	.	.	.	.	.	.	.	.	.	.	.	c.832G>T	p.Gly278Ter	p.G278*	ENST00000305107	2/6	217	189	27	244	244	0	UGT2B4,stop_gained,p.Gly278Ter,ENST00000305107,;UGT2B4,stop_gained,p.Gly278Ter,ENST00000512583,;UGT2B4,stop_gained,p.Gly142Ter,ENST00000381096,;UGT2B4,downstream_gene_variant,,ENST00000510114,;UGT2B4,non_coding_transcript_exon_variant,,ENST00000506580,;UGT2B4,non_coding_transcript_exon_variant,,ENST00000503836,;UGT2B4,non_coding_transcript_exon_variant,,ENST00000502655,;	A
TCGA-50-6592-01A-11D-1753-08	UGT2B10	0	.	GRCh37	4	69692148	69692148	+	Silent	SNP	G	G	T	.	.	LUAD		TCGA-50-6592-01A-11D-1753-08	TCGA-50-6592-11A-01D-1753-08	G	G	.	.	.	.	.	.	.	.	.	.	.	.	.	.	.	c.1020G>T	p.%3D	p.G340G	ENST00000265403	4/6	111	88	22	126	126	0	UGT2B10,synonymous_variant,p.%3D,ENST00000265403,;UGT2B10,synonymous_variant,p.%3D,ENST00000458688,;	T
TCGA-50-6593-01A-11D-1753-08	UGT2B28	0	.	GRCh37	4	70160247	70160247	+	Splice_Site	SNP	G	G	C	.	.	LUAD		TCGA-50-6593-01A-11D-1753-08	TCGA-50-6593-11A-01D-1753-08	G	G	.	.	.	.	.	.	.	.	.	.	.	.	.	.	.	c.1311-1G>C	.	p.X437_splice	ENST00000335568	.	94	80	13	55	55	0	UGT2B28,splice_acceptor_variant,,ENST00000511240,;UGT2B28,splice_acceptor_variant,,ENST00000335568,;	C
TCGA-50-6594-01A-11D-1753-08	UGT2A3	0	.	GRCh37	4	69811094	69811094	+	Missense_Mutation	SNP	G	G	T	rs767127535	.	LUAD		TCGA-50-6594-01A-11D-1753-08	TCGA-50-6594-11A-01D-1753-08	G	G	.	.	.	.	.	.	.	.	.	.	.	.	.	.	.	c.794C>A	p.Pro265His	p.P265H	ENST00000251566	2/6	99	58	40	77	77	0	UGT2A3,missense_variant,p.Pro265His,ENST00000251566,;UGT2A3,5_prime_UTR_variant,,ENST00000420231,;UGT2A3,missense_variant,p.Pro131His,ENST00000503012,;	T
TCGA-50-6594-01A-11D-1753-08	UGT2B17	0	.	GRCh37	4	69416547	69416547	+	Silent	SNP	A	A	G	rs147227030	.	LUAD		TCGA-50-6594-01A-11D-1753-08	TCGA-50-6594-11A-01D-1753-08	A	A	.	.	.	.	.	.	.	.	.	.	.	.	.	.	.	c.1161T>C	p.%3D	p.H387H	ENST00000317746	5/6	298	218	80	220	219	1	UGT2B17,synonymous_variant,p.%3D,ENST00000317746,;	G
TCGA-53-7624-01A-11D-2063-08	UGT1A6	0	.	GRCh37	2	234601751	234601751	+	Missense_Mutation	SNP	A	A	T	.	.	LUAD		TCGA-53-7624-01A-11D-2063-08	TCGA-53-7624-10A-01D-2063-08	A	A	.	.	.	.	.	.	.	.	.	.	.	.	.	.	.	c.101A>T	p.Gln34Leu	p.Q34L	ENST00000305139	1/5	83	44	39	47	47	0	UGT1A6,missense_variant,p.Gln34Leu,ENST00000441351,;UGT1A6,missense_variant,p.Gln34Leu,ENST00000305139,;UGT1A10,intron_variant,,ENST00000373445,;UGT1A6,intron_variant,,ENST00000373424,;UGT1A7,intron_variant,,ENST00000373426,;UGT1A8,intron_variant,,ENST00000609637,;UGT1A10,intron_variant,,ENST00000344644,;UGT1A8,intron_variant,,ENST00000373450,;UGT1A9,intron_variant,,ENST00000354728,;UGT1A7,downst…	T
TCGA-53-7624-01A-11D-2063-08	UGT2A2	0	.	GRCh37	4	70505055	70505055	+	Missense_Mutation	SNP	G	G	T	novel	.	LUAD		TCGA-53-7624-01A-11D-2063-08	TCGA-53-7624-10A-01D-2063-08	G	G	.	.	.	.	.	.	.	.	.	.	.	.	.	.	.	c.304C>A	p.Leu102Met	p.L102M	ENST00000457664	1/6	96	77	19	59	59	0	UGT2A2,missense_variant,p.Leu103Met,ENST00000604021,;UGT2A2,missense_variant,p.Leu102Met,ENST00000457664,;UGT2A1,missense_variant,p.Leu303Met,ENST00000514019,;UGT2A2,missense_variant,p.Leu103Met,ENST00000604629,;UGT2A1,intron_variant,,ENST00000286604,;UGT2A1,intron_variant,,ENST00000512704,;UGT2A1,intron_variant,,ENST00000503640,;	T
TCGA-53-7624-01A-11D-2063-08	UGT2A2	0	.	GRCh37	4	70505056	70505056	+	Missense_Mutation	SNP	C	C	T	novel	.	LUAD		TCGA-53-7624-01A-11D-2063-08	TCGA-53-7624-10A-01D-2063-08	C	C	.	.	.	.	.	.	.	.	.	.	.	.	.	.	.	c.303G>A	p.Met101Ile	p.M101I	ENST00000457664	1/6	95	76	19	58	58	0	UGT2A2,missense_variant,p.Met102Ile,ENST00000604021,;UGT2A2,missense_variant,p.Met101Ile,ENST00000457664,;UGT2A1,missense_variant,p.Met302Ile,ENST00000514019,;UGT2A2,missense_variant,p.Met102Ile,ENST00000604629,;UGT2A1,intron_variant,,ENST00000286604,;UGT2A1,intron_variant,,ENST00000512704,;UGT2A1,intron_variant,,ENST00000503640,;	T
TCGA-53-7624-01A-11D-2063-08	UGT2B4	0	.	GRCh37	4	70346572	70346572	+	Missense_Mutation	SNP	G	G	A	.	.	LUAD		TCGA-53-7624-01A-11D-2063-08	TCGA-53-7624-10A-01D-2063-08	G	G	.	.	.	.	.	.	.	.	.	.	.	.	.	.	.	c.1367C>T	p.Pro456Leu	p.P456L	ENST00000305107	6/6	129	86	43	84	84	0	UGT2B4,missense_variant,p.Pro456Leu,ENST00000305107,;UGT2B4,missense_variant,p.Pro320Leu,ENST00000381096,;UGT2B4,3_prime_UTR_variant,,ENST00000512583,;AC108078.1,downstream_gene_variant,,ENST00000583573,;UGT2B4,non_coding_transcript_exon_variant,,ENST00000506580,;UGT2B4,downstream_gene_variant,,ENST00000502655,;	A
TCGA-55-1595-01A-01D-0969-08	UGT2A1	0	.	GRCh37	4	70455270	70455270	+	Missense_Mutation	SNP	G	G	T	.	.	LUAD		TCGA-55-1595-01A-01D-0969-08	TCGA-55-1595-11A-01D-0969-08	G	G	.	.	.	.	.	.	.	.	.	.	.	.	.	.	.	c.1902C>A	p.His634Gln	p.H634Q	ENST00000514019	7/7	144	123	21	331	331	0	UGT2A1,missense_variant,p.His468Gln,ENST00000286604,;UGT2A1,missense_variant,p.His634Gln,ENST00000514019,;UGT2A1,missense_variant,p.His468Gln,ENST00000503640,;UGT2A2,missense_variant,p.His434Gln,ENST00000604021,;UGT2A2,missense_variant,p.His477Gln,ENST00000457664,;UGT2A1,missense_variant,p.His424Gln,ENST00000512704,;UGT2A2,missense_variant,p.His478Gln,ENST00000604629,;UGT2A1,downstream_gene_varia…	T
TCGA-55-1596-01A-01D-1040-01	UGT2A1	0	.	GRCh37	4	70460898	70460898	+	Missense_Mutation	SNP	G	G	T	rs769602732	.	LUAD		TCGA-55-1596-01A-01D-1040-01	TCGA-55-1596-11A-01D-1040-01	G	G	.	.	.	.	.	.	.	.	.	.	.	.	.	.	.	c.1564C>A	p.Pro522Thr	p.P522T	ENST00000514019	5/7	46	35	10	39	39	0	UGT2A1,missense_variant,p.Pro356Thr,ENST00000286604,;UGT2A1,missense_variant,p.Pro522Thr,ENST00000514019,;UGT2A1,missense_variant,p.Pro356Thr,ENST00000503640,;UGT2A2,missense_variant,p.Pro322Thr,ENST00000604021,;UGT2A2,missense_variant,p.Pro365Thr,ENST00000457664,;UGT2A1,missense_variant,p.Pro312Thr,ENST00000512704,;UGT2A2,missense_variant,p.Pro366Thr,ENST00000604629,;UGT2A1,non_coding_transcript…	T
TCGA-55-5899-01A-11D-1625-08	UGT2B7	0	.	GRCh37	4	69962880	69962880	+	Missense_Mutation	SNP	G	G	A	.	.	LUAD		TCGA-55-5899-01A-11D-1625-08	TCGA-55-5899-10A-01D-1625-08	G	G	.	.	.	.	.	.	.	.	.	.	.	.	.	.	.	c.642G>A	p.Met214Ile	p.M214I	ENST00000305231	1/6	96	50	46	95	95	0	UGT2B7,missense_variant,p.Met214Ile,ENST00000305231,;UGT2B7,missense_variant,p.Met214Ile,ENST00000508661,;UGT2B7,intron_variant,,ENST00000502942,;UGT2B7,intron_variant,,ENST00000509763,;	A
TCGA-55-5899-01A-11D-1625-08	UGT3A1	0	.	GRCh37	5	35954243	35954243	+	3'UTR	SNP	G	G	T	novel	.	LUAD		TCGA-55-5899-01A-11D-1625-08	TCGA-55-5899-10A-01D-1625-08	G	G	.	.	.	.	.	.	.	.	.	.	.	.	.	.	.	c.*61C>A	.	.	ENST00000274278	7/7	28	14	13	16	16	0	UGT3A1,3_prime_UTR_variant,,ENST00000274278,;UGT3A1,downstream_gene_variant,,ENST00000507113,;UGT3A1,downstream_gene_variant,,ENST00000503189,;UGT3A1,downstream_gene_variant,,ENST00000513233,;UGT3A1,3_prime_UTR_variant,,ENST00000515801,;	T
TCGA-55-6968-01A-11D-1945-08	UGT2B28	0	.	GRCh37	4	70155453	70155453	+	Missense_Mutation	SNP	C	C	A	.	.	LUAD		TCGA-55-6968-01A-11D-1945-08	TCGA-55-6968-11A-01D-1945-08	C	C	.	.	.	.	.	.	.	.	.	.	.	.	.	.	.	c.1073C>A	p.Pro358His	p.P358H	ENST00000335568	4/6	72	50	21	99	99	0	UGT2B28,missense_variant,p.Pro358His,ENST00000335568,;UGT2B28,intron_variant,,ENST00000511240,;	A
TCGA-55-6968-01A-11D-1945-08	UGT3A2	0	.	GRCh37	5	36064368	36064368	+	Missense_Mutation	SNP	C	C	G	rs777551593	.	LUAD		TCGA-55-6968-01A-11D-1945-08	TCGA-55-6968-11A-01D-1945-08	C	C	.	.	.	.	.	.	.	.	.	.	.	.	.	.	.	c.179G>C	p.Arg60Thr	p.R60T	ENST00000282507	2/7	46	43	3	33	33	0	UGT3A2,missense_variant,p.Arg60Thr,ENST00000515131,;UGT3A2,missense_variant,p.Arg60Thr,ENST00000282507,;UGT3A2,5_prime_UTR_variant,,ENST00000545528,;UGT3A2,intron_variant,,ENST00000513300,;UGT3A2,non_coding_transcript_exon_variant,,ENST00000504954,;UGT3A2,missense_variant,p.Arg60Thr,ENST00000504685,;	G
TCGA-55-6969-01A-11D-1945-08	UGT1A7	0	.	GRCh37	2	234590659	234590659	+	Missense_Mutation	SNP	G	G	T	.	.	LUAD		TCGA-55-6969-01A-11D-1945-08	TCGA-55-6969-11A-01D-1945-08	G	G	.	.	.	.	.	.	.	.	.	.	.	.	.	.	.	c.76G>T	p.Gly26Trp	p.G26W	ENST00000373426	1/5	151	133	18	233	233	0	UGT1A7,missense_variant,p.Gly26Trp,ENST00000373426,;UGT1A10,intron_variant,,ENST00000373445,;UGT1A10,intron_variant,,ENST00000344644,;UGT1A8,intron_variant,,ENST00000373450,;UGT1A8,intron_variant,,ENST00000609637,;UGT1A9,intron_variant,,ENST00000354728,;UGT1A7,upstream_gene_variant,,ENST00000485022,;	T
TCGA-55-6975-01A-11D-1945-08	UGT1A10	0	.	GRCh37	2	234545830	234545830	+	Missense_Mutation	SNP	A	A	T	rs569576876	.	LUAD		TCGA-55-6975-01A-11D-1945-08	TCGA-55-6975-11A-01D-1945-08	A	A	.	.	.	.	.	.	.	.	.	.	.	.	.	.	.	c.662A>T	p.Gln221Leu	p.Q221L	ENST00000344644	1/5	380	275	105	374	373	0	UGT1A10,missense_variant,p.Gln221Leu,ENST00000373445,;UGT1A10,missense_variant,p.Gln221Leu,ENST00000344644,;UGT1A8,intron_variant,,ENST00000373450,;	T
TCGA-55-6981-01A-11D-1945-08	UGT1A10	0	.	GRCh37	2	234545643	234545643	+	Missense_Mutation	SNP	A	A	G	.	.	LUAD		TCGA-55-6981-01A-11D-1945-08	TCGA-55-6981-11A-01D-1945-08	A	A	.	.	.	.	.	.	.	.	.	.	.	.	.	.	.	c.475A>G	p.Lys159Glu	p.K159E	ENST00000344644	1/5	171	143	28	373	373	0	UGT1A10,missense_variant,p.Lys159Glu,ENST00000373445,;UGT1A10,missense_variant,p.Lys159Glu,ENST00000344644,;UGT1A8,intron_variant,,ENST00000373450,;	G
TCGA-55-6983-01A-11D-1945-08	UGT3A2	0	.	GRCh37	5	36066953	36066953	+	5'UTR	SNP	G	G	T	novel	.	LUAD		TCGA-55-6983-01A-11D-1945-08	TCGA-55-6983-11A-01D-1945-08	G	G	.	.	.	.	.	.	.	.	.	.	.	.	.	.	.	c.-62C>A	.	.	ENST00000282507	1/7	41	35	6	42	42	0	UGT3A2,5_prime_UTR_variant,,ENST00000513300,;UGT3A2,5_prime_UTR_variant,,ENST00000545528,;UGT3A2,5_prime_UTR_variant,,ENST00000515131,;UGT3A2,5_prime_UTR_variant,,ENST00000282507,;UGT3A2,intron_variant,,ENST00000504954,;UGT3A2,5_prime_UTR_variant,,ENST00000504685,;CTD-2197M16.1,downstream_gene_variant,,ENST00000505367,;	T
TCGA-55-6985-01A-11D-1945-08	UGT1A5	0	.	GRCh37	2	234622111	234622111	+	Silent	SNP	G	G	T	rs147117995	.	LUAD		TCGA-55-6985-01A-11D-1945-08	TCGA-55-6985-11A-01D-1945-08	G	G	.	.	.	.	.	.	.	.	.	.	.	.	.	.	.	c.474G>T	p.%3D	p.A158A	ENST00000373414	1/5	124	94	30	139	139	0	UGT1A8,synonymous_variant,p.%3D,ENST00000608381,;UGT1A5,synonymous_variant,p.%3D,ENST00000373414,;UGT1A10,intron_variant,,ENST00000373445,;UGT1A6,intron_variant,,ENST00000305139,;UGT1A6,intron_variant,,ENST00000373424,;UGT1A7,intron_variant,,ENST00000373426,;UGT1A8,intron_variant,,ENST00000609637,;UGT1A6,intron_variant,,ENST00000406651,;UGT1A10,intron_variant,,ENST00000344644,;UGT1A8,intron_varia…	T
TCGA-55-6985-01A-11D-1945-08	UGT2A3	0	.	GRCh37	4	69795685	69795685	+	Missense_Mutation	SNP	G	G	C	rs770995000	.	LUAD		TCGA-55-6985-01A-11D-1945-08	TCGA-55-6985-11A-01D-1945-08	G	G	.	.	.	.	.	.	.	.	.	.	.	.	.	.	.	c.1430C>G	p.Ala477Gly	p.A477G	ENST00000251566	6/6	109	75	33	80	80	0	UGT2A3,missense_variant,p.Ala477Gly,ENST00000251566,;UGT2A3,missense_variant,p.Ala188Gly,ENST00000420231,;UGT2A3,3_prime_UTR_variant,,ENST00000503012,;	C
TCGA-55-6985-01A-11D-1945-08	UGT3A2	0	.	GRCh37	5	36052038	36052038	+	Missense_Mutation	SNP	G	G	A	.	.	LUAD		TCGA-55-6985-01A-11D-1945-08	TCGA-55-6985-11A-01D-1945-08	G	G	.	.	.	.	.	.	.	.	.	.	.	.	.	.	.	c.245C>T	p.Pro82Leu	p.P82L	ENST00000282507	3/7	62	40	21	38	38	0	UGT3A2,missense_variant,p.Pro48Leu,ENST00000513300,;UGT3A2,missense_variant,p.Pro82Leu,ENST00000515131,;UGT3A2,missense_variant,p.Pro82Leu,ENST00000282507,;UGT3A2,5_prime_UTR_variant,,ENST00000545528,;UGT3A2,non_coding_transcript_exon_variant,,ENST00000504954,;UGT3A2,missense_variant,p.Pro82Leu,ENST00000504685,;	A
TCGA-55-6987-01A-11D-1945-08	UGT2B11	0	.	GRCh37	4	70074116	70074116	+	Nonsense_Mutation	SNP	C	C	A	.	.	LUAD		TCGA-55-6987-01A-11D-1945-08	TCGA-55-6987-11A-01D-1945-08	C	C	.	.	.	.	.	.	.	.	.	.	.	.	.	.	.	c.955G>T	p.Glu319Ter	p.E319*	ENST00000446444	3/6	190	176	14	178	178	0	UGT2B11,stop_gained,p.Glu319Ter,ENST00000446444,;RP11-704M14.1,intron_variant,,ENST00000504301,;RP11-704M14.1,intron_variant,,ENST00000505646,;UGT2B11,upstream_gene_variant,,ENST00000513315,;	A
TCGA-55-7570-01A-11D-2036-08	UGT2B10	0	.	GRCh37	4	69696438	69696438	+	Silent	SNP	A	A	T	.	.	LUAD		TCGA-55-7570-01A-11D-2036-08	TCGA-55-7570-10A-01D-2036-08	A	A	.	.	.	.	.	.	.	.	.	.	.	.	.	.	.	c.1428A>T	p.%3D	p.R476R	ENST00000265403	6/6	266	218	48	253	253	0	UGT2B10,synonymous_variant,p.%3D,ENST00000265403,;UGT2B10,synonymous_variant,p.%3D,ENST00000458688,;RP11-468N14.3,downstream_gene_variant,,ENST00000512503,;	T
TCGA-55-7574-01A-11D-2036-08	UGT1A5	0	.	GRCh37	2	234622209	234622209	+	Missense_Mutation	SNP	C	C	G	rs267599272	.	LUAD		TCGA-55-7574-01A-11D-2036-08	TCGA-55-7574-10A-01D-2036-08	C	C	.	.	.	.	.	.	.	.	.	.	.	.	.	.	.	c.572C>G	p.Ser191Cys	p.S191C	ENST00000373414	1/5	221	207	14	195	195	0	UGT1A8,missense_variant,p.Ser191Cys,ENST00000608381,;UGT1A5,missense_variant,p.Ser191Cys,ENST00000373414,;UGT1A10,intron_variant,,ENST00000373445,;UGT1A6,intron_variant,,ENST00000305139,;UGT1A6,intron_variant,,ENST00000373424,;UGT1A7,intron_variant,,ENST00000373426,;UGT1A8,intron_variant,,ENST00000609637,;UGT1A6,intron_variant,,ENST00000406651,;UGT1A10,intron_variant,,ENST00000344644,;UGT1A8,intr…	G
TCGA-55-7576-01A-11D-2063-08	UGT1A4	0	.	GRCh37	2	234627778	234627778	+	Silent	SNP	A	A	G	rs373602050	.	LUAD		TCGA-55-7576-01A-11D-2063-08	TCGA-55-7576-10A-01D-2063-08	A	A	.	.	.	.	.	.	.	.	.	.	.	.	.	.	.	c.312A>G	p.%3D	p.E104E	ENST00000373409	1/5	235	128	107	155	155	0	UGT1A4,synonymous_variant,p.%3D,ENST00000373409,;UGT1A10,intron_variant,,ENST00000373445,;UGT1A6,intron_variant,,ENST00000305139,;UGT1A6,intron_variant,,ENST00000373424,;UGT1A8,intron_variant,,ENST00000608381,;UGT1A7,intron_variant,,ENST00000373426,;UGT1A8,intron_variant,,ENST00000609637,;UGT1A5,intron_variant,,ENST00000373414,;UGT1A6,intron_variant,,ENST00000406651,;UGT1A10,intron_variant,,ENST0…	G
TCGA-55-7907-01A-11D-2167-08	UGT1A5	0	.	GRCh37	2	234621740	234621740	+	Frame_Shift_Del	DEL	C	C	-	novel	.	LUAD		TCGA-55-7907-01A-11D-2167-08	TCGA-55-7907-10A-01D-2167-08	C	C	.	.	.	.	.	.	.	.	.	.	.	.	.	.	.	c.105delC	p.Thr36LeufsTer30	p.T36Lfs*30	ENST00000373414	1/5	39	34	5	35	35	0	UGT1A8,frameshift_variant,p.Thr36LeufsTer30,ENST00000608381,;UGT1A5,frameshift_variant,p.Thr36LeufsTer30,ENST00000373414,;UGT1A10,intron_variant,,ENST00000373445,;UGT1A6,intron_variant,,ENST00000305139,;UGT1A6,intron_variant,,ENST00000373424,;UGT1A7,intron_variant,,ENST00000373426,;UGT1A8,intron_variant,,ENST00000609637,;UGT1A6,intron_variant,,ENST00000406651,;UGT1A10,intron_variant,,ENST00000344…	-
TCGA-55-7907-01A-11D-2167-08	UGT1A8	0	.	GRCh37	2	234526798	234526798	+	Missense_Mutation	SNP	C	C	A	.	.	LUAD		TCGA-55-7907-01A-11D-2167-08	TCGA-55-7907-10A-01D-2167-08	C	C	.	.	.	.	.	.	.	.	.	.	.	.	.	.	.	c.445C>A	p.Pro149Thr	p.P149T	ENST00000373450	1/5	134	113	21	116	116	0	UGT1A8,missense_variant,p.Pro149Thr,ENST00000373450,;	A
TCGA-55-7907-01A-11D-2167-08	UGT1A8	0	.	GRCh37	2	234526799	234526799	+	Missense_Mutation	SNP	C	C	A	novel	.	LUAD		TCGA-55-7907-01A-11D-2167-08	TCGA-55-7907-10A-01D-2167-08	C	C	.	.	.	.	.	.	.	.	.	.	.	.	.	.	.	c.446C>A	p.Pro149His	p.P149H	ENST00000373450	1/5	132	111	21	115	115	0	UGT1A8,missense_variant,p.Pro149His,ENST00000373450,;	A
TCGA-55-7907-01A-11D-2167-08	UGT3A1	0	.	GRCh37	5	35955804	35955804	+	Missense_Mutation	SNP	T	T	A	.	.	LUAD		TCGA-55-7907-01A-11D-2167-08	TCGA-55-7907-10A-01D-2167-08	T	T	.	.	.	.	.	.	.	.	.	.	.	.	.	.	.	c.1238A>T	p.Asn413Ile	p.N413I	ENST00000274278	6/7	116	81	34	119	119	0	UGT3A1,missense_variant,p.Asn413Ile,ENST00000274278,;UGT3A1,missense_variant,p.Asn379Ile,ENST00000507113,;UGT3A1,missense_variant,p.Asn413Ile,ENST00000503189,;UGT3A1,downstream_gene_variant,,ENST00000513233,;UGT3A1,3_prime_UTR_variant,,ENST00000515801,;	A
TCGA-55-7910-01A-11D-2167-08	UGT2B28	0	.	GRCh37	4	70156385	70156385	+	Missense_Mutation	SNP	C	C	G	.	.	LUAD		TCGA-55-7910-01A-11D-2167-08	TCGA-55-7910-11A-01D-2167-08	C	C	.	.	.	.	.	.	.	.	.	.	.	.	.	.	.	c.1166C>G	p.Pro389Arg	p.P389R	ENST00000335568	5/6	105	89	16	121	121	0	UGT2B28,missense_variant,p.Pro389Arg,ENST00000335568,;UGT2B28,intron_variant,,ENST00000511240,;	G
TCGA-55-7913-01B-11D-2238-08	UGT2B11	0	.	GRCh37	4	70066308	70066308	+	Silent	SNP	G	G	T	.	.	LUAD		TCGA-55-7913-01B-11D-2238-08	TCGA-55-7913-10A-01D-2238-08	G	G	.	.	.	.	.	.	.	.	.	.	.	.	.	.	.	c.1440C>A	p.%3D	p.A480A	ENST00000446444	6/6	242	205	36	175	175	0	UGT2B11,synonymous_variant,p.%3D,ENST00000446444,;RP11-704M14.1,intron_variant,,ENST00000504301,;RP11-704M14.1,intron_variant,,ENST00000505646,;UGT2B11,downstream_gene_variant,,ENST00000513315,;	T
TCGA-55-7914-01A-11D-2167-08	UGT1A9	0	.	GRCh37	2	234580839	234580839	+	Missense_Mutation	SNP	G	G	C	rs570830637	.	LUAD		TCGA-55-7914-01A-11D-2167-08	TCGA-55-7914-10A-01D-2167-08	G	G	.	.	.	.	.	.	.	.	.	.	.	.	.	.	.	c.259G>C	p.Asp87His	p.D87H	ENST00000354728	1/5	99	58	41	51	51	0	UGT1A8,missense_variant,p.Asp87His,ENST00000609637,;UGT1A9,missense_variant,p.Asp87His,ENST00000354728,;UGT1A10,intron_variant,,ENST00000373445,;UGT1A10,intron_variant,,ENST00000344644,;UGT1A8,intron_variant,,ENST00000373450,;	C
TCGA-55-7994-01A-11D-2184-08	UGT2A1	0	.	GRCh37	4	70455213	70455213	+	Missense_Mutation	SNP	G	G	T	novel	.	LUAD		TCGA-55-7994-01A-11D-2184-08	TCGA-55-7994-10A-01D-2184-08	G	G	.	.	.	.	.	.	.	.	.	.	.	.	.	.	.	c.1959C>A	p.His653Gln	p.H653Q	ENST00000514019	7/7	172	115	56	184	184	0	UGT2A1,missense_variant,p.His487Gln,ENST00000286604,;UGT2A1,missense_variant,p.His653Gln,ENST00000514019,;UGT2A1,missense_variant,p.His487Gln,ENST00000503640,;UGT2A2,missense_variant,p.His453Gln,ENST00000604021,;UGT2A2,missense_variant,p.His496Gln,ENST00000457664,;UGT2A1,missense_variant,p.His443Gln,ENST00000512704,;UGT2A2,missense_variant,p.His497Gln,ENST00000604629,;UGT2A1,downstream_gene_varia…	T
TCGA-55-7995-01A-11D-2184-08	UGT2B11	0	.	GRCh37	4	70078342	70078342	+	Missense_Mutation	SNP	G	G	C	rs375976357	.	LUAD		TCGA-55-7995-01A-11D-2184-08	TCGA-55-7995-10A-01D-2184-08	G	G	.	.	.	.	.	.	.	.	.	.	.	.	.	.	.	c.819C>G	p.Asn273Lys	p.N273K	ENST00000446444	2/6	192	166	26	180	180	0	UGT2B11,missense_variant,p.Asn273Lys,ENST00000446444,;RP11-704M14.1,intron_variant,,ENST00000504301,;RP11-704M14.1,intron_variant,,ENST00000505646,;RP11-704M14.2,downstream_gene_variant,,ENST00000514003,;	C
TCGA-55-8085-01A-11D-2238-08	UGT2B7	0	.	GRCh37	4	69973850	69973850	+	Missense_Mutation	SNP	C	C	A	novel	.	LUAD		TCGA-55-8085-01A-11D-2238-08	TCGA-55-8085-10A-01D-2238-08	C	C	.	.	.	.	.	.	.	.	.	.	.	.	.	.	.	c.1120C>A	p.His374Asn	p.H374N	ENST00000305231	5/6	199	146	53	195	195	0	UGT2B7,missense_variant,p.His374Asn,ENST00000305231,;UGT2B7,missense_variant,p.His125Asn,ENST00000502942,;UGT2B7,intron_variant,,ENST00000508661,;UGT2B7,intron_variant,,ENST00000509763,;	A
TCGA-55-8089-01A-11D-2238-08	UGT2A2	0	.	GRCh37	4	70504987	70504987	+	Silent	SNP	T	T	C	rs559680857	.	LUAD		TCGA-55-8089-01A-11D-2238-08	TCGA-55-8089-10A-01D-2238-08	T	T	.	.	.	.	.	.	.	.	.	.	.	.	.	.	.	c.372A>G	p.%3D	p.L124L	ENST00000457664	1/6	47	42	4	38	38	0	UGT2A2,synonymous_variant,p.%3D,ENST00000604021,;UGT2A2,synonymous_variant,p.%3D,ENST00000457664,;UGT2A1,synonymous_variant,p.%3D,ENST00000514019,;UGT2A2,synonymous_variant,p.%3D,ENST00000604629,;UGT2A1,intron_variant,,ENST00000286604,;UGT2A1,intron_variant,,ENST00000512704,;UGT2A1,intron_variant,,ENST00000503640,;	C
TCGA-55-8089-01A-11D-2238-08	UGT2B17	0	.	GRCh37	4	69433611	69433611	+	Missense_Mutation	SNP	C	C	T	novel	.	LUAD		TCGA-55-8089-01A-11D-2238-08	TCGA-55-8089-10A-01D-2238-08	C	C	.	.	.	.	.	.	.	.	.	.	.	.	.	.	.	c.592G>A	p.Val198Ile	p.V198I	ENST00000317746	1/6	166	146	20	163	163	0	UGT2B17,missense_variant,p.Val198Ile,ENST00000317746,;	T
TCGA-55-8092-01A-11D-2238-08	UGT1A5	0	.	GRCh37	2	234622322	234622322	+	Missense_Mutation	SNP	G	G	T	novel	.	LUAD		TCGA-55-8092-01A-11D-2238-08	TCGA-55-8092-10A-01D-2238-08	G	G	.	.	.	.	.	.	.	.	.	.	.	.	.	.	.	c.685G>T	p.Ala229Ser	p.A229S	ENST00000373414	1/5	351	304	47	273	273	0	UGT1A8,missense_variant,p.Ala229Ser,ENST00000608381,;UGT1A5,missense_variant,p.Ala229Ser,ENST00000373414,;UGT1A10,intron_variant,,ENST00000373445,;UGT1A6,intron_variant,,ENST00000305139,;UGT1A6,intron_variant,,ENST00000373424,;UGT1A7,intron_variant,,ENST00000373426,;UGT1A8,intron_variant,,ENST00000609637,;UGT1A6,intron_variant,,ENST00000406651,;UGT1A10,intron_variant,,ENST00000344644,;UGT1A8,intr…	T
TCGA-55-8092-01A-11D-2238-08	UGT2A2	0	.	GRCh37	4	70504865	70504865	+	Missense_Mutation	SNP	C	C	A	novel	.	LUAD		TCGA-55-8092-01A-11D-2238-08	TCGA-55-8092-10A-01D-2238-08	C	C	.	.	.	.	.	.	.	.	.	.	.	.	.	.	.	c.494G>T	p.Gly165Val	p.G165V	ENST00000457664	1/6	53	45	7	46	46	0	UGT2A2,missense_variant,p.Gly166Val,ENST00000604021,;UGT2A2,missense_variant,p.Gly165Val,ENST00000457664,;UGT2A1,missense_variant,p.Gly366Val,ENST00000514019,;UGT2A2,missense_variant,p.Gly166Val,ENST00000604629,;UGT2A1,intron_variant,,ENST00000286604,;UGT2A1,intron_variant,,ENST00000512704,;UGT2A1,intron_variant,,ENST00000503640,;	A
TCGA-55-8203-01A-11D-2238-08	UGT3A1	0	.	GRCh37	5	35965662	35965662	+	Missense_Mutation	SNP	G	G	T	rs752068122	.	LUAD		TCGA-55-8203-01A-11D-2238-08	TCGA-55-8203-10A-01D-2238-08	G	G	.	.	.	.	.	.	.	.	.	.	.	.	.	.	.	c.669C>A	p.Asn223Lys	p.N223K	ENST00000274278	4/7	76	65	11	96	96	0	UGT3A1,missense_variant,p.Asn223Lys,ENST00000274278,;UGT3A1,missense_variant,p.Asn189Lys,ENST00000507113,;UGT3A1,missense_variant,p.Asn169Lys,ENST00000333811,;UGT3A1,missense_variant,p.Asn223Lys,ENST00000503189,;UGT3A1,intron_variant,,ENST00000513233,;UGT3A1,3_prime_UTR_variant,,ENST00000515801,;	T
TCGA-55-8203-01A-11D-2238-08	UGT3A2	0	.	GRCh37	5	36035917	36035917	+	Silent	SNP	C	C	A	rs773828490	.	LUAD		TCGA-55-8203-01A-11D-2238-08	TCGA-55-8203-10A-01D-2238-08	C	C	.	.	.	.	.	.	.	.	.	.	.	.	.	.	.	c.1455G>T	p.%3D	p.L485L	ENST00000282507	7/7	30	25	5	51	51	0	UGT3A2,synonymous_variant,p.%3D,ENST00000513300,;UGT3A2,synonymous_variant,p.%3D,ENST00000545528,;UGT3A2,synonymous_variant,p.%3D,ENST00000282507,;UGT3A2,downstream_gene_variant,,ENST00000504954,;UGT3A2,3_prime_UTR_variant,,ENST00000504685,;	A
TCGA-55-8205-01A-11D-2238-08	UGT2B28	0	.	GRCh37	4	70146307	70146307	+	Missense_Mutation	SNP	C	C	G	rs778371702	.	LUAD		TCGA-55-8205-01A-11D-2238-08	TCGA-55-8205-10A-01D-2238-08	C	C	.	.	.	.	.	.	.	.	.	.	.	.	.	.	.	c.89C>G	p.Thr30Ser	p.T30S	ENST00000335568	1/6	116	70	45	60	60	0	UGT2B28,missense_variant,p.Thr30Ser,ENST00000511240,;UGT2B28,missense_variant,p.Thr30Ser,ENST00000335568,;	G
TCGA-55-8207-01A-11D-2238-08	UGT3A1	0	.	GRCh37	5	35965844	35965844	+	Missense_Mutation	SNP	C	C	T	novel	.	LUAD		TCGA-55-8207-01A-11D-2238-08	TCGA-55-8207-10A-01D-2238-08	C	C	.	.	.	.	.	.	.	.	.	.	.	.	.	.	.	c.487G>A	p.Val163Met	p.V163M	ENST00000274278	4/7	83	52	31	69	69	0	UGT3A1,missense_variant,p.Val163Met,ENST00000274278,;UGT3A1,missense_variant,p.Val129Met,ENST00000507113,;UGT3A1,missense_variant,p.Val109Met,ENST00000333811,;UGT3A1,missense_variant,p.Val163Met,ENST00000503189,;UGT3A1,intron_variant,,ENST00000513233,;UGT3A1,3_prime_UTR_variant,,ENST00000515801,;	T
TCGA-55-8302-01A-11D-2323-08	UGT2A1	0	.	GRCh37	4	70460332	70460332	+	Silent	SNP	C	C	T	novel	.	LUAD		TCGA-55-8302-01A-11D-2323-08	TCGA-55-8302-10A-01D-2323-08	C	C	.	.	.	.	.	.	.	.	.	.	.	.	.	.	.	c.1665G>A	p.%3D	p.V555V	ENST00000514019	6/7	161	133	28	74	74	0	UGT2A1,synonymous_variant,p.%3D,ENST00000286604,;UGT2A1,synonymous_variant,p.%3D,ENST00000514019,;UGT2A1,synonymous_variant,p.%3D,ENST00000503640,;UGT2A2,synonymous_variant,p.%3D,ENST00000604021,;UGT2A2,synonymous_variant,p.%3D,ENST00000457664,;UGT2A1,synonymous_variant,p.%3D,ENST00000512704,;UGT2A2,synonymous_variant,p.%3D,ENST00000604629,;UGT2A1,non_coding_transcript_exon_variant,,ENST000005023…	T
TCGA-55-8506-01A-11D-2393-08	UGT1A5	0	.	GRCh37	2	234621866	234621866	+	Missense_Mutation	SNP	C	C	A	novel	.	LUAD		TCGA-55-8506-01A-11D-2393-08	TCGA-55-8506-10A-01D-2393-08	C	C	.	.	.	.	.	.	.	.	.	.	.	.	.	.	.	c.229C>A	p.Leu77Met	p.L77M	ENST00000373414	1/5	78	51	26	167	167	0	UGT1A8,missense_variant,p.Leu77Met,ENST00000608381,;UGT1A5,missense_variant,p.Leu77Met,ENST00000373414,;UGT1A10,intron_variant,,ENST00000373445,;UGT1A6,intron_variant,,ENST00000305139,;UGT1A6,intron_variant,,ENST00000373424,;UGT1A7,intron_variant,,ENST00000373426,;UGT1A8,intron_variant,,ENST00000609637,;UGT1A6,intron_variant,,ENST00000406651,;UGT1A10,intron_variant,,ENST00000344644,;UGT1A8,intron…	A
TCGA-55-8506-01A-11D-2393-08	UGT1A5	0	.	GRCh37	2	234622397	234622397	+	Missense_Mutation	SNP	G	G	A	novel	.	LUAD		TCGA-55-8506-01A-11D-2393-08	TCGA-55-8506-10A-01D-2393-08	G	G	.	.	.	.	.	.	.	.	.	.	.	.	.	.	.	c.760G>A	p.Val254Met	p.V254M	ENST00000373414	1/5	306	203	102	421	420	1	UGT1A5,missense_variant,p.Val254Met,ENST00000373414,;UGT1A8,missense_variant,p.Val254Met,ENST00000608381,;UGT1A10,intron_variant,,ENST00000373445,;UGT1A6,intron_variant,,ENST00000305139,;UGT1A6,intron_variant,,ENST00000406651,;UGT1A6,intron_variant,,ENST00000373424,;UGT1A7,intron_variant,,ENST00000373426,;UGT1A8,intron_variant,,ENST00000373450,;UGT1A10,intron_variant,,ENST00000344644,;UGT1A8,intr…	A
TCGA-55-8506-01A-11D-2393-08	UGT2B15	0	.	GRCh37	4	69536127	69536127	+	Silent	SNP	A	A	T	rs371557884	.	LUAD		TCGA-55-8506-01A-11D-2393-08	TCGA-55-8506-10A-01D-2393-08	A	A	.	.	.	.	.	.	.	.	.	.	.	.	.	.	.	c.210T>A	p.%3D	p.S70S	ENST00000338206	1/6	214	147	67	303	303	0	UGT2B15,synonymous_variant,p.%3D,ENST00000338206,;	T
TCGA-55-8506-01A-11D-2393-08	UGT2B4	0	.	GRCh37	4	70359461	70359461	+	Missense_Mutation	SNP	C	C	T	rs578216873	.	LUAD		TCGA-55-8506-01A-11D-2393-08	TCGA-55-8506-10A-01D-2393-08	C	C	.	.	.	.	.	.	.	.	.	.	.	.	.	.	.	c.820G>A	p.Val274Ile	p.V274I	ENST00000305107	2/6	167	118	48	215	215	0	UGT2B4,missense_variant,p.Val274Ile,ENST00000305107,;UGT2B4,missense_variant,p.Val274Ile,ENST00000512583,;UGT2B4,missense_variant,p.Val138Ile,ENST00000381096,;UGT2B4,downstream_gene_variant,,ENST00000510114,;UGT2B4,non_coding_transcript_exon_variant,,ENST00000506580,;UGT2B4,non_coding_transcript_exon_variant,,ENST00000503836,;UGT2B4,non_coding_transcript_exon_variant,,ENST00000502655,;	T
TCGA-55-8506-01A-11D-2393-08	UGT2B4	0	.	GRCh37	4	70359531	70359531	+	Missense_Mutation	SNP	C	C	T	novel	.	LUAD		TCGA-55-8506-01A-11D-2393-08	TCGA-55-8506-10A-01D-2393-08	C	C	.	.	.	.	.	.	.	.	.	.	.	.	.	.	.	c.750G>A	p.Met250Ile	p.M250I	ENST00000305107	2/6	83	69	14	122	122	0	UGT2B4,missense_variant,p.Met250Ile,ENST00000305107,;UGT2B4,missense_variant,p.Met250Ile,ENST00000512583,;UGT2B4,missense_variant,p.Met114Ile,ENST00000381096,;UGT2B4,downstream_gene_variant,,ENST00000510114,;UGT2B4,non_coding_transcript_exon_variant,,ENST00000506580,;UGT2B4,non_coding_transcript_exon_variant,,ENST00000503836,;UGT2B4,non_coding_transcript_exon_variant,,ENST00000502655,;	T
TCGA-55-8506-01A-11D-2393-08	UGT3A1	0	.	GRCh37	5	35991346	35991346	+	5'UTR	SNP	C	C	A	novel	.	LUAD		TCGA-55-8506-01A-11D-2393-08	TCGA-55-8506-10A-01D-2393-08	C	C	.	.	.	.	.	.	.	.	.	.	.	.	.	.	.	c.-4G>T	.	.	ENST00000274278	1/7	165	133	31	108	108	0	UGT3A1,5_prime_UTR_variant,,ENST00000274278,;UGT3A1,5_prime_UTR_variant,,ENST00000507113,;UGT3A1,5_prime_UTR_variant,,ENST00000503189,;UGT3A1,intron_variant,,ENST00000333811,;UGT3A1,non_coding_transcript_exon_variant,,ENST00000513233,;UGT3A1,5_prime_UTR_variant,,ENST00000515801,;	A
TCGA-55-8507-01A-11D-2393-08	UGT1A8	0	.	GRCh37	2	234669600	234669600	+	Intron	SNP	T	T	C	novel	.	LUAD		TCGA-55-8507-01A-11D-2393-08	TCGA-55-8507-10A-01D-2393-08	T	T	.	.	.	.	.	.	.	.	.	.	.	.	.	.	.	c.868-6080T>C	.	.	ENST00000609767	.	143	106	36	259	259	0	UGT1A8,missense_variant,p.Cys223Arg,ENST00000608383,;UGT1A8,missense_variant,p.Cys223Arg,ENST00000360418,;UGT1A1,missense_variant,p.Cys223Arg,ENST00000305208,;UGT1A10,intron_variant,,ENST00000373445,;UGT1A4,intron_variant,,ENST00000373409,;UGT1A6,intron_variant,,ENST00000305139,;UGT1A3,intron_variant,,ENST00000482026,;UGT1A6,intron_variant,,ENST00000373424,;UGT1A8,intron_variant,,ENST00000608381,…	C
TCGA-55-8507-01A-11D-2393-08	UGT2A1	0	.	GRCh37	4	70465027	70465027	+	Silent	SNP	T	T	C	rs141874261	.	LUAD		TCGA-55-8507-01A-11D-2393-08	TCGA-55-8507-10A-01D-2393-08	T	T	.	.	.	.	.	.	.	.	.	.	.	.	.	.	.	c.1431A>G	p.%3D	p.P477P	ENST00000514019	4/7	25	19	5	59	59	0	UGT2A1,synonymous_variant,p.%3D,ENST00000286604,;UGT2A1,synonymous_variant,p.%3D,ENST00000514019,;UGT2A1,synonymous_variant,p.%3D,ENST00000503640,;UGT2A2,synonymous_variant,p.%3D,ENST00000604021,;UGT2A2,synonymous_variant,p.%3D,ENST00000457664,;UGT2A1,synonymous_variant,p.%3D,ENST00000512704,;UGT2A2,synonymous_variant,p.%3D,ENST00000604629,;UGT2A1,non_coding_transcript_exon_variant,,ENST000005023…	C
TCGA-55-8507-01A-11D-2393-08	UGT2B15	0	.	GRCh37	4	69535777	69535777	+	Missense_Mutation	SNP	C	C	A	novel	.	LUAD		TCGA-55-8507-01A-11D-2393-08	TCGA-55-8507-10A-01D-2393-08	C	C	.	.	.	.	.	.	.	.	.	.	.	.	.	.	.	c.560G>T	p.Gly187Val	p.G187V	ENST00000338206	1/6	101	69	31	266	266	0	UGT2B15,missense_variant,p.Gly187Val,ENST00000338206,;	A
TCGA-55-8507-01A-11D-2393-08	UGT2B7	0	.	GRCh37	4	69964359	69964359	+	Missense_Mutation	SNP	G	G	T	rs112352348	.	LUAD		TCGA-55-8507-01A-11D-2393-08	TCGA-55-8507-10A-01D-2393-08	G	G	.	.	.	.	.	.	.	.	.	.	.	.	.	.	.	c.823G>T	p.Asp275Tyr	p.D275Y	ENST00000305231	2/6	79	54	25	300	299	1	UGT2B7,missense_variant,p.Asp275Tyr,ENST00000305231,;UGT2B7,missense_variant,p.Asp275Tyr,ENST00000508661,;UGT2B7,missense_variant,p.Asp26Tyr,ENST00000502942,;UGT2B7,non_coding_transcript_exon_variant,,ENST00000509763,;	T
TCGA-55-8507-01A-11D-2393-08	UGT3A1	0	.	GRCh37	5	35955672	35955672	+	Intron	SNP	A	A	C	novel	.	LUAD		TCGA-55-8507-01A-11D-2393-08	TCGA-55-8507-10A-01D-2393-08	A	A	.	.	.	.	.	.	.	.	.	.	.	.	.	.	.	c.1295+75T>G	.	.	ENST00000274278	.	22	18	4	14	14	0	UGT3A1,3_prime_UTR_variant,,ENST00000507113,;UGT3A1,3_prime_UTR_variant,,ENST00000503189,;UGT3A1,intron_variant,,ENST00000274278,;UGT3A1,downstream_gene_variant,,ENST00000513233,;UGT3A1,3_prime_UTR_variant,,ENST00000515801,;	C
TCGA-55-8508-01A-11D-2393-08	UGT2A1	0	.	GRCh37	4	70465083	70465083	+	Missense_Mutation	SNP	C	C	G	novel	.	LUAD		TCGA-55-8508-01A-11D-2393-08	TCGA-55-8508-10A-01D-2393-08	C	C	.	.	.	.	.	.	.	.	.	.	.	.	.	.	.	c.1375G>C	p.Gly459Arg	p.G459R	ENST00000514019	4/7	89	76	13	86	86	0	UGT2A1,missense_variant,p.Gly293Arg,ENST00000286604,;UGT2A1,missense_variant,p.Gly459Arg,ENST00000514019,;UGT2A1,missense_variant,p.Gly249Arg,ENST00000503640,;UGT2A2,missense_variant,p.Gly259Arg,ENST00000604021,;UGT2A2,missense_variant,p.Gly258Arg,ENST00000457664,;UGT2A1,missense_variant,p.Gly249Arg,ENST00000512704,;UGT2A2,missense_variant,p.Gly259Arg,ENST00000604629,;UGT2A1,non_coding_transcript…	G
TCGA-55-8508-01A-11D-2393-08	UGT2B11	0	.	GRCh37	4	70066318	70066318	+	Missense_Mutation	SNP	C	C	A	rs767731098	.	LUAD		TCGA-55-8508-01A-11D-2393-08	TCGA-55-8508-10A-01D-2393-08	C	C	.	.	.	.	.	.	.	.	.	.	.	.	.	.	.	c.1430G>T	p.Arg477Leu	p.R477L	ENST00000446444	6/6	181	141	39	256	256	0	UGT2B11,missense_variant,p.Arg477Leu,ENST00000446444,;RP11-704M14.1,intron_variant,,ENST00000504301,;RP11-704M14.1,intron_variant,,ENST00000505646,;UGT2B11,downstream_gene_variant,,ENST00000513315,;	A
TCGA-55-8510-01A-11D-2393-08	UGT2A1	0	.	GRCh37	4	70460316	70460316	+	Missense_Mutation	SNP	C	C	T	rs376828121	.	LUAD		TCGA-55-8510-01A-11D-2393-08	TCGA-55-8510-10A-01D-2393-08	C	C	.	.	.	.	.	.	.	.	.	.	.	.	.	.	.	c.1681G>A	p.Ala561Thr	p.A561T	ENST00000514019	6/7	131	114	17	67	67	0	UGT2A1,missense_variant,p.Ala395Thr,ENST00000286604,;UGT2A1,missense_variant,p.Ala561Thr,ENST00000514019,;UGT2A1,missense_variant,p.Ala395Thr,ENST00000503640,;UGT2A2,missense_variant,p.Ala361Thr,ENST00000604021,;UGT2A2,missense_variant,p.Ala404Thr,ENST00000457664,;UGT2A1,missense_variant,p.Ala351Thr,ENST00000512704,;UGT2A2,missense_variant,p.Ala405Thr,ENST00000604629,;UGT2A1,non_coding_transcript…	T
TCGA-55-8510-01A-11D-2393-08	UGT2A3	0	.	GRCh37	4	69811098	69811098	+	Missense_Mutation	SNP	A	A	T	novel	.	LUAD		TCGA-55-8510-01A-11D-2393-08	TCGA-55-8510-10A-01D-2393-08	A	A	.	.	.	.	.	.	.	.	.	.	.	.	.	.	.	c.790T>A	p.Phe264Ile	p.F264I	ENST00000251566	2/6	64	50	13	58	58	0	UGT2A3,missense_variant,p.Phe264Ile,ENST00000251566,;UGT2A3,5_prime_UTR_variant,,ENST00000420231,;UGT2A3,missense_variant,p.Phe130Ile,ENST00000503012,;	T
TCGA-55-8616-01A-11D-2393-08	UGT2B15	0	.	GRCh37	4	69535943	69535943	+	Missense_Mutation	SNP	C	C	T	novel	.	LUAD		TCGA-55-8616-01A-11D-2393-08	TCGA-55-8616-10A-01D-2393-08	C	C	.	.	.	.	.	.	.	.	.	.	.	.	.	.	.	c.394G>A	p.Val132Ile	p.V132I	ENST00000338206	1/6	81	55	26	163	163	0	UGT2B15,missense_variant,p.Val132Ile,ENST00000338206,;	T
TCGA-55-8620-01A-11D-2393-08	UGT2B28	0	.	GRCh37	4	70156355	70156355	+	Missense_Mutation	SNP	G	G	T	.	.	LUAD		TCGA-55-8620-01A-11D-2393-08	TCGA-55-8620-10A-01D-2393-08	G	G	.	.	.	.	.	.	.	.	.	.	.	.	.	.	.	c.1136G>T	p.Gly379Val	p.G379V	ENST00000335568	5/6	256	104	152	246	246	0	UGT2B28,missense_variant,p.Gly379Val,ENST00000335568,;UGT2B28,intron_variant,,ENST00000511240,;	T
TCGA-55-A48X-01A-11D-A24D-08	UGT1A4	0	.	GRCh37	2	234681091	234681091	+	Missense_Mutation	SNP	G	G	C	novel	.	LUAD		TCGA-55-A48X-01A-11D-A24D-08	TCGA-55-A48X-10A-01D-A24F-08	G	G	.	.	.	.	.	.	.	.	.	.	.	.	.	.	.	c.1491G>C	p.Leu497Phe	p.L497F	ENST00000373409	5/5	125	110	14	133	133	0	UGT1A4,missense_variant,p.Leu497Phe,ENST00000373409,;UGT1A6,missense_variant,p.Leu495Phe,ENST00000305139,;UGT1A3,missense_variant,p.Leu497Phe,ENST00000482026,;UGT1A6,missense_variant,p.Leu228Phe,ENST00000373424,;UGT1A8,missense_variant,p.Leu496Phe,ENST00000608383,;UGT1A8,missense_variant,p.Leu497Phe,ENST00000608381,;UGT1A7,missense_variant,p.Leu493Phe,ENST00000373426,;UGT1A8,missense_variant,p.Le…	C
TCGA-55-A48X-01A-11D-A24D-08	UGT2B11	0	.	GRCh37	4	70079956	70079956	+	Missense_Mutation	SNP	G	G	A	rs775064565	.	LUAD		TCGA-55-A48X-01A-11D-A24D-08	TCGA-55-A48X-10A-01D-A24F-08	G	G	.	.	.	.	.	.	.	.	.	.	.	.	.	.	.	c.485C>T	p.Ala162Val	p.A162V	ENST00000446444	1/6	96	81	14	113	113	0	UGT2B11,missense_variant,p.Ala162Val,ENST00000446444,;RP11-704M14.1,intron_variant,,ENST00000504301,;RP11-704M14.1,intron_variant,,ENST00000505646,;RP11-704M14.2,downstream_gene_variant,,ENST00000514003,;	A
TCGA-55-A48X-01A-11D-A24D-08	UGT2B4	0	.	GRCh37	4	70351084	70351084	+	Silent	SNP	G	G	T	novel	.	LUAD		TCGA-55-A48X-01A-11D-A24D-08	TCGA-55-A48X-10A-01D-A24F-08	G	G	.	.	.	.	.	.	.	.	.	.	.	.	.	.	.	c.1152C>A	p.%3D	p.I384I	ENST00000305107	5/6	135	120	15	187	187	0	UGT2B4,synonymous_variant,p.%3D,ENST00000305107,;UGT2B4,synonymous_variant,p.%3D,ENST00000381096,;UGT2B4,intron_variant,,ENST00000512583,;UGT2B4,non_coding_transcript_exon_variant,,ENST00000502655,;UGT2B4,intron_variant,,ENST00000506580,;UGT2B4,downstream_gene_variant,,ENST00000503836,;	T
TCGA-55-A48Y-01A-11D-A24D-08	UGT1A8	0	.	GRCh37	2	234669540	234669540	+	Intron	SNP	C	C	A	novel	.	LUAD		TCGA-55-A48Y-01A-11D-A24D-08	TCGA-55-A48Y-10A-01D-A24F-08	C	C	.	.	.	.	.	.	.	.	.	.	.	.	.	.	.	c.868-6140C>A	.	.	ENST00000609767	.	171	152	19	211	211	0	UGT1A8,missense_variant,p.His203Asn,ENST00000608383,;UGT1A8,missense_variant,p.His203Asn,ENST00000360418,;UGT1A1,missense_variant,p.His203Asn,ENST00000305208,;UGT1A10,intron_variant,,ENST00000373445,;UGT1A4,intron_variant,,ENST00000373409,;UGT1A6,intron_variant,,ENST00000305139,;UGT1A3,intron_variant,,ENST00000482026,;UGT1A6,intron_variant,,ENST00000373424,;UGT1A8,intron_variant,,ENST00000608381,…	A
TCGA-55-A490-01A-11D-A24D-08	UGT2A3	0	.	GRCh37	4	69817194	69817194	+	Silent	SNP	C	C	T	novel	.	LUAD		TCGA-55-A490-01A-11D-A24D-08	TCGA-55-A490-10A-01D-A24F-08	C	C	.	.	.	.	.	.	.	.	.	.	.	.	.	.	.	c.285G>A	p.%3D	p.L95L	ENST00000251566	1/6	28	10	18	35	35	0	UGT2A3,synonymous_variant,p.%3D,ENST00000251566,;UGT2A3,upstream_gene_variant,,ENST00000420231,;UGT2A3,upstream_gene_variant,,ENST00000503012,;	T
TCGA-55-A490-01A-11D-A24D-08	UGT2B10	0	.	GRCh37	4	69692184	69692184	+	Silent	SNP	G	G	C	novel	.	LUAD		TCGA-55-A490-01A-11D-A24D-08	TCGA-55-A490-10A-01D-A24F-08	G	G	.	.	.	.	.	.	.	.	.	.	.	.	.	.	.	c.1056G>C	p.%3D	p.L352L	ENST00000265403	4/6	15	9	6	30	30	0	UGT2B10,synonymous_variant,p.%3D,ENST00000265403,;UGT2B10,synonymous_variant,p.%3D,ENST00000458688,;	C
TCGA-55-A490-01A-11D-A24D-08	UGT3A1	0	.	GRCh37	5	35957513	35957513	+	Missense_Mutation	SNP	G	G	T	rs370782310	.	LUAD		TCGA-55-A490-01A-11D-A24D-08	TCGA-55-A490-10A-01D-A24F-08	G	G	.	.	.	.	.	.	.	.	.	.	.	.	.	.	.	c.852C>A	p.Asp284Glu	p.D284E	ENST00000274278	5/7	58	50	8	34	34	0	UGT3A1,missense_variant,p.Asp284Glu,ENST00000274278,;UGT3A1,missense_variant,p.Asp250Glu,ENST00000507113,;UGT3A1,missense_variant,p.Asp284Glu,ENST00000503189,;UGT3A1,downstream_gene_variant,,ENST00000333811,;UGT3A1,non_coding_transcript_exon_variant,,ENST00000513233,;UGT3A1,3_prime_UTR_variant,,ENST00000515801,;	T
TCGA-55-A492-01A-11D-A24D-08	UGT1A5	0	.	GRCh37	2	234621904	234621904	+	Missense_Mutation	SNP	T	T	A	novel	.	LUAD		TCGA-55-A492-01A-11D-A24D-08	TCGA-55-A492-10A-01D-A24F-08	T	T	.	.	.	.	.	.	.	.	.	.	.	.	.	.	.	c.267T>A	p.Phe89Leu	p.F89L	ENST00000373414	1/5	117	105	12	141	141	0	UGT1A8,missense_variant,p.Phe89Leu,ENST00000608381,;UGT1A5,missense_variant,p.Phe89Leu,ENST00000373414,;UGT1A10,intron_variant,,ENST00000373445,;UGT1A6,intron_variant,,ENST00000305139,;UGT1A6,intron_variant,,ENST00000373424,;UGT1A7,intron_variant,,ENST00000373426,;UGT1A8,intron_variant,,ENST00000609637,;UGT1A6,intron_variant,,ENST00000406651,;UGT1A10,intron_variant,,ENST00000344644,;UGT1A8,intron…	A
TCGA-55-A492-01A-11D-A24D-08	UGT3A1	0	.	GRCh37	5	35954551	35954551	+	Missense_Mutation	SNP	A	A	T	novel	.	LUAD		TCGA-55-A492-01A-11D-A24D-08	TCGA-55-A492-10A-01D-A24F-08	A	A	.	.	.	.	.	.	.	.	.	.	.	.	.	.	.	c.1325T>A	p.Val442Asp	p.V442D	ENST00000274278	7/7	42	26	16	25	25	0	UGT3A1,missense_variant,p.Val442Asp,ENST00000274278,;UGT3A1,downstream_gene_variant,,ENST00000507113,;UGT3A1,downstream_gene_variant,,ENST00000503189,;UGT3A1,downstream_gene_variant,,ENST00000513233,;UGT3A1,3_prime_UTR_variant,,ENST00000515801,;	T
TCGA-55-A4DF-01A-11D-A24D-08	UGT1A9	0	.	GRCh37	2	234581152	234581152	+	Missense_Mutation	SNP	C	C	A	rs774848302	.	LUAD		TCGA-55-A4DF-01A-11D-A24D-08	TCGA-55-A4DF-10A-01D-A24F-08	C	C	.	.	.	.	.	.	.	.	.	.	.	.	.	.	.	c.572C>A	p.Pro191His	p.P191H	ENST00000354728	1/5	227	186	40	278	278	0	UGT1A8,missense_variant,p.Pro191His,ENST00000609637,;UGT1A9,missense_variant,p.Pro191His,ENST00000354728,;UGT1A10,intron_variant,,ENST00000373445,;UGT1A10,intron_variant,,ENST00000344644,;UGT1A8,intron_variant,,ENST00000373450,;	A
TCGA-55-A4DG-01A-11D-A24D-08	UGT2B11	0	.	GRCh37	4	70066379	70066379	+	Missense_Mutation	SNP	G	G	T	rs560641099	.	LUAD		TCGA-55-A4DG-01A-11D-A24D-08	TCGA-55-A4DG-10A-01D-A24F-08	G	G	.	.	.	.	.	.	.	.	.	.	.	.	.	.	.	c.1369C>A	p.Leu457Met	p.L457M	ENST00000446444	6/6	90	62	28	139	139	0	UGT2B11,missense_variant,p.Leu457Met,ENST00000446444,;RP11-704M14.1,intron_variant,,ENST00000504301,;RP11-704M14.1,intron_variant,,ENST00000505646,;UGT2B11,downstream_gene_variant,,ENST00000513315,;	T
TCGA-62-8399-01A-21D-2323-08	UGT3A1	0	.	GRCh37	5	35965879	35965879	+	Missense_Mutation	SNP	G	G	C	novel	.	LUAD		TCGA-62-8399-01A-21D-2323-08	TCGA-62-8399-10A-01D-2323-08	G	G	.	.	.	.	.	.	.	.	.	.	.	.	.	.	.	c.452C>G	p.Ser151Cys	p.S151C	ENST00000274278	4/7	130	122	8	81	81	0	UGT3A1,missense_variant,p.Ser151Cys,ENST00000274278,;UGT3A1,missense_variant,p.Ser117Cys,ENST00000507113,;UGT3A1,missense_variant,p.Ser97Cys,ENST00000333811,;UGT3A1,missense_variant,p.Ser151Cys,ENST00000503189,;UGT3A1,intron_variant,,ENST00000513233,;UGT3A1,3_prime_UTR_variant,,ENST00000515801,;	C
TCGA-62-A46O-01A-11D-A24D-08	UGT2B4	0	.	GRCh37	4	70355182	70355182	+	Missense_Mutation	SNP	G	G	A	novel	.	LUAD		TCGA-62-A46O-01A-11D-A24D-08	TCGA-62-A46O-10A-01D-A24F-08	G	G	.	.	.	.	.	.	.	.	.	.	.	.	.	.	.	c.977C>T	p.Ser326Leu	p.S326L	ENST00000305107	3/6	82	58	24	154	154	0	UGT2B4,missense_variant,p.Ser326Leu,ENST00000305107,;UGT2B4,missense_variant,p.Ser326Leu,ENST00000512583,;UGT2B4,missense_variant,p.Ser190Leu,ENST00000381096,;UGT2B4,non_coding_transcript_exon_variant,,ENST00000506580,;UGT2B4,non_coding_transcript_exon_variant,,ENST00000502655,;UGT2B4,downstream_gene_variant,,ENST00000503836,;	A
TCGA-62-A46O-01A-11D-A24D-08	UGT2B4	0	.	GRCh37	4	70361050	70361050	+	Missense_Mutation	SNP	C	C	T	novel	.	LUAD		TCGA-62-A46O-01A-11D-A24D-08	TCGA-62-A46O-10A-01D-A24F-08	C	C	.	.	.	.	.	.	.	.	.	.	.	.	.	.	.	c.530G>A	p.Gly177Asp	p.G177D	ENST00000305107	1/6	12	6	6	52	52	0	UGT2B4,missense_variant,p.Gly177Asp,ENST00000305107,;UGT2B4,missense_variant,p.Gly177Asp,ENST00000512583,;UGT2B4,missense_variant,p.Gly41Asp,ENST00000381096,;UGT2B4,downstream_gene_variant,,ENST00000510114,;UGT2B4,non_coding_transcript_exon_variant,,ENST00000502655,;UGT2B4,intron_variant,,ENST00000506580,;UGT2B4,intron_variant,,ENST00000503836,;	T
TCGA-62-A46P-01A-11D-A24D-08	UGT2B15	0	.	GRCh37	4	69536113	69536113	+	Missense_Mutation	SNP	T	T	G	novel	.	LUAD		TCGA-62-A46P-01A-11D-A24D-08	TCGA-62-A46P-10A-01D-A24F-08	T	T	.	.	.	.	.	.	.	.	.	.	.	.	.	.	.	c.224A>C	p.Glu75Ala	p.E75A	ENST00000338206	1/6	143	92	51	220	220	0	UGT2B15,missense_variant,p.Glu75Ala,ENST00000338206,;	G
TCGA-62-A46R-01A-11D-A24D-08	UGT1A8	0	.	GRCh37	2	234669197	234669197	+	Intron	SNP	G	G	T	novel	.	LUAD		TCGA-62-A46R-01A-11D-A24D-08	TCGA-62-A46R-10A-01D-A24F-08	G	G	.	.	.	.	.	.	.	.	.	.	.	.	.	.	.	c.868-6483G>T	.	.	ENST00000609767	.	161	133	27	200	200	0	UGT1A8,synonymous_variant,p.%3D,ENST00000608383,;UGT1A8,synonymous_variant,p.%3D,ENST00000360418,;UGT1A1,synonymous_variant,p.%3D,ENST00000305208,;UGT1A10,intron_variant,,ENST00000373445,;UGT1A4,intron_variant,,ENST00000373409,;UGT1A6,intron_variant,,ENST00000305139,;UGT1A3,intron_variant,,ENST00000482026,;UGT1A6,intron_variant,,ENST00000373424,;UGT1A8,intron_variant,,ENST00000608381,;UGT1A7,intr…	T
TCGA-62-A46U-01A-11D-A24D-08	UGT1A5	0	.	GRCh37	2	234622244	234622244	+	Missense_Mutation	SNP	G	G	C	novel	.	LUAD		TCGA-62-A46U-01A-11D-A24D-08	TCGA-62-A46U-10A-01D-A24F-08	G	G	.	.	.	.	.	.	.	.	.	.	.	.	.	.	.	c.607G>C	p.Asp203His	p.D203H	ENST00000373414	1/5	211	193	18	194	194	0	UGT1A8,missense_variant,p.Asp203His,ENST00000608381,;UGT1A5,missense_variant,p.Asp203His,ENST00000373414,;UGT1A10,intron_variant,,ENST00000373445,;UGT1A6,intron_variant,,ENST00000305139,;UGT1A6,intron_variant,,ENST00000373424,;UGT1A7,intron_variant,,ENST00000373426,;UGT1A8,intron_variant,,ENST00000609637,;UGT1A6,intron_variant,,ENST00000406651,;UGT1A10,intron_variant,,ENST00000344644,;UGT1A8,intr…	C
TCGA-64-1676-01A-01D-0969-08	UGT2B4	0	.	GRCh37	4	70346378	70346378	+	Missense_Mutation	SNP	T	T	C	.	.	LUAD		TCGA-64-1676-01A-01D-0969-08	TCGA-64-1676-10A-01D-0969-08	T	T	.	.	.	.	.	.	.	.	.	.	.	.	.	.	.	c.1561A>G	p.Thr521Ala	p.T521A	ENST00000305107	6/6	229	175	54	224	223	0	UGT2B4,missense_variant,p.Thr521Ala,ENST00000305107,;UGT2B4,missense_variant,p.Thr385Ala,ENST00000381096,;UGT2B4,3_prime_UTR_variant,,ENST00000512583,;AC108078.1,downstream_gene_variant,,ENST00000583573,;UGT2B4,non_coding_transcript_exon_variant,,ENST00000506580,;UGT2B4,downstream_gene_variant,,ENST00000502655,;	C
TCGA-64-1677-01A-01W-0928-08	UGT3A2	0	.	GRCh37	5	36037956	36037956	+	Missense_Mutation	SNP	T	T	C	.	.	LUAD		TCGA-64-1677-01A-01W-0928-08	TCGA-64-1677-10A-01W-0928-08	T	T	.	.	.	.	.	.	.	.	.	.	.	.	.	.	.	c.1238A>G	p.Lys413Arg	p.K413R	ENST00000282507	6/7	692	586	105	728	728	0	UGT3A2,missense_variant,p.Lys379Arg,ENST00000513300,;UGT3A2,missense_variant,p.Lys111Arg,ENST00000545528,;UGT3A2,missense_variant,p.Lys413Arg,ENST00000282507,;UGT3A2,downstream_gene_variant,,ENST00000504954,;UGT3A2,3_prime_UTR_variant,,ENST00000504685,;	C
TCGA-64-1679-01A-21D-2063-08	UGT1A4	0	.	GRCh37	2	234628155	234628155	+	Missense_Mutation	SNP	C	C	T	rs372293131	.	LUAD		TCGA-64-1679-01A-21D-2063-08	TCGA-64-1679-10A-01D-2063-08	C	C	.	.	.	.	.	.	.	.	.	.	.	.	.	.	.	c.689C>T	p.Pro230Leu	p.P230L	ENST00000373409	1/5	250	203	47	260	259	0	UGT1A4,missense_variant,p.Pro230Leu,ENST00000373409,;UGT1A10,intron_variant,,ENST00000373445,;UGT1A6,intron_variant,,ENST00000305139,;UGT1A6,intron_variant,,ENST00000373424,;UGT1A8,intron_variant,,ENST00000608381,;UGT1A7,intron_variant,,ENST00000373426,;UGT1A8,intron_variant,,ENST00000609637,;UGT1A5,intron_variant,,ENST00000373414,;UGT1A6,intron_variant,,ENST00000406651,;UGT1A10,intron_variant,,E…	T
TCGA-64-1679-01A-21D-2063-08	UGT2B17	0	.	GRCh37	4	69433871	69433871	+	Nonsense_Mutation	SNP	G	G	C	novel	.	LUAD		TCGA-64-1679-01A-21D-2063-08	TCGA-64-1679-10A-01D-2063-08	G	G	.	.	.	.	.	.	.	.	.	.	.	.	.	.	.	c.332C>G	p.Ser111Ter	p.S111*	ENST00000317746	1/6	78	44	33	51	51	0	UGT2B17,stop_gained,p.Ser111Ter,ENST00000317746,;	C
TCGA-64-5775-01A-01D-1625-08	UGT2B10	0	.	GRCh37	4	69682288	69682288	+	Missense_Mutation	SNP	G	G	C	rs774482094	.	LUAD		TCGA-64-5775-01A-01D-1625-08	TCGA-64-5775-10A-01D-1625-08	G	G	.	.	.	.	.	.	.	.	.	.	.	.	.	.	.	c.551G>C	p.Gly184Ala	p.G184A	ENST00000265403	1/6	106	52	53	84	83	0	UGT2B10,missense_variant,p.Gly184Ala,ENST00000265403,;UGT2B10,intron_variant,,ENST00000458688,;RP11-468N14.1,downstream_gene_variant,,ENST00000507455,;	C
TCGA-64-5775-01A-01D-1625-08	UGT2B4	0	.	GRCh37	4	70346228	70346228	+	3'UTR	SNP	G	G	T	novel	.	LUAD		TCGA-64-5775-01A-01D-1625-08	TCGA-64-5775-10A-01D-1625-08	G	G	.	.	.	.	.	.	.	.	.	.	.	.	.	.	.	c.*124C>A	.	.	ENST00000305107	6/6	11	4	7	10	10	0	UGT2B4,3_prime_UTR_variant,,ENST00000305107,;UGT2B4,3_prime_UTR_variant,,ENST00000512583,;UGT2B4,3_prime_UTR_variant,,ENST00000381096,;AC108078.1,downstream_gene_variant,,ENST00000583573,;UGT2B4,non_coding_transcript_exon_variant,,ENST00000506580,;UGT2B4,downstream_gene_variant,,ENST00000502655,;	T
TCGA-64-5778-01A-01D-1625-08	UGT1A3	0	.	GRCh37	2	234637908	234637908	+	Missense_Mutation	SNP	G	G	C	.	.	LUAD		TCGA-64-5778-01A-01D-1625-08	TCGA-64-5778-10A-01D-1625-08	G	G	.	.	.	.	.	.	.	.	.	.	.	.	.	.	.	c.136G>C	p.Glu46Gln	p.E46Q	ENST00000482026	1/5	54	39	15	68	68	0	UGT1A3,missense_variant,p.Glu46Gln,ENST00000482026,;UGT1A8,missense_variant,p.Glu46Gln,ENST00000609767,;UGT1A10,intron_variant,,ENST00000373445,;UGT1A4,intron_variant,,ENST00000373409,;UGT1A6,intron_variant,,ENST00000305139,;UGT1A6,intron_variant,,ENST00000373424,;UGT1A8,intron_variant,,ENST00000608381,;UGT1A7,intron_variant,,ENST00000373426,;UGT1A8,intron_variant,,ENST00000609637,;UGT1A5,intron_…	C
TCGA-64-5781-01A-01D-1625-08	UGT2B11	0	.	GRCh37	4	70071210	70071210	+	Missense_Mutation	SNP	T	T	G	.	.	LUAD		TCGA-64-5781-01A-01D-1625-08	TCGA-64-5781-10A-01D-1625-08	T	T	.	.	.	.	.	.	.	.	.	.	.	.	.	.	.	c.1078A>C	p.Asn360His	p.N360H	ENST00000446444	4/6	86	79	7	98	98	0	UGT2B11,missense_variant,p.Asn360His,ENST00000446444,;RP11-704M14.1,intron_variant,,ENST00000504301,;RP11-704M14.1,intron_variant,,ENST00000505646,;UGT2B11,non_coding_transcript_exon_variant,,ENST00000513315,;	G
TCGA-64-5781-01A-01D-1625-08	UGT2B11	0	.	GRCh37	4	70071213	70071213	+	Missense_Mutation	SNP	G	G	T	.	.	LUAD		TCGA-64-5781-01A-01D-1625-08	TCGA-64-5781-10A-01D-1625-08	G	G	.	.	.	.	.	.	.	.	.	.	.	.	.	.	.	c.1075C>A	p.Gln359Lys	p.Q359K	ENST00000446444	4/6	87	79	8	99	99	0	UGT2B11,missense_variant,p.Gln359Lys,ENST00000446444,;RP11-704M14.1,intron_variant,,ENST00000504301,;RP11-704M14.1,intron_variant,,ENST00000505646,;UGT2B11,non_coding_transcript_exon_variant,,ENST00000513315,;	T
TCGA-64-5781-01A-01D-1625-08	UGT2B4	0	.	GRCh37	4	70346329	70346329	+	3'UTR	SNP	C	C	A	novel	.	LUAD		TCGA-64-5781-01A-01D-1625-08	TCGA-64-5781-10A-01D-1625-08	C	C	.	.	.	.	.	.	.	.	.	.	.	.	.	.	.	c.*23G>T	.	.	ENST00000305107	6/6	75	61	14	63	62	1	UGT2B4,3_prime_UTR_variant,,ENST00000305107,;UGT2B4,3_prime_UTR_variant,,ENST00000512583,;UGT2B4,3_prime_UTR_variant,,ENST00000381096,;AC108078.1,downstream_gene_variant,,ENST00000583573,;UGT2B4,non_coding_transcript_exon_variant,,ENST00000506580,;UGT2B4,downstream_gene_variant,,ENST00000502655,;	A
TCGA-64-5781-01A-01D-1625-08	UGT3A1	0	.	GRCh37	5	35954247	35954247	+	3'UTR	SNP	G	G	T	novel	.	LUAD		TCGA-64-5781-01A-01D-1625-08	TCGA-64-5781-10A-01D-1625-08	G	G	.	.	.	.	.	.	.	.	.	.	.	.	.	.	.	c.*57C>A	.	.	ENST00000274278	7/7	30	22	8	18	18	0	UGT3A1,3_prime_UTR_variant,,ENST00000274278,;UGT3A1,downstream_gene_variant,,ENST00000507113,;UGT3A1,downstream_gene_variant,,ENST00000503189,;UGT3A1,downstream_gene_variant,,ENST00000513233,;UGT3A1,3_prime_UTR_variant,,ENST00000515801,;	T
TCGA-64-5815-01A-01D-1625-08	UGT2B10	0	.	GRCh37	4	69696511	69696511	+	Missense_Mutation	SNP	G	G	T	.	.	LUAD		TCGA-64-5815-01A-01D-1625-08	TCGA-64-5815-10A-01D-1625-08	G	G	.	.	.	.	.	.	.	.	.	.	.	.	.	.	.	c.1501G>T	p.Ala501Ser	p.A501S	ENST00000265403	6/6	103	90	13	147	147	0	UGT2B10,missense_variant,p.Ala501Ser,ENST00000265403,;UGT2B10,missense_variant,p.Ala417Ser,ENST00000458688,;RP11-468N14.3,downstream_gene_variant,,ENST00000512503,;	T
TCGA-67-3771-01A-01D-1040-01	UGT2B11	0	.	GRCh37	4	70070363	70070363	+	Silent	SNP	A	A	G	.	.	LUAD		TCGA-67-3771-01A-01D-1040-01	TCGA-67-3771-10A-01D-1040-01	A	A	.	.	.	.	.	.	.	.	.	.	.	.	.	.	.	c.1095T>C	p.%3D	p.H365H	ENST00000446444	5/6	35	28	7	112	112	0	UGT2B11,synonymous_variant,p.%3D,ENST00000446444,;RP11-704M14.1,intron_variant,,ENST00000504301,;RP11-704M14.1,intron_variant,,ENST00000505646,;UGT2B11,non_coding_transcript_exon_variant,,ENST00000513315,;	G
TCGA-67-3774-01A-01D-1040-01	UGT2B7	0	.	GRCh37	4	69962330	69962330	+	Missense_Mutation	SNP	C	C	T	.	.	LUAD		TCGA-67-3774-01A-01D-1040-01	TCGA-67-3774-10A-01D-1489-08	C	C	.	.	.	.	.	.	.	.	.	.	.	.	.	.	.	c.92C>T	p.Ala31Val	p.A31V	ENST00000305231	1/6	74	58	16	261	261	0	UGT2B7,missense_variant,p.Ala31Val,ENST00000305231,;UGT2B7,missense_variant,p.Ala31Val,ENST00000508661,;UGT2B7,intron_variant,,ENST00000502942,;UGT2B7,intron_variant,,ENST00000509763,;	T
TCGA-67-6217-01A-11D-1753-08	UGT2B7	0	.	GRCh37	4	69978338	69978338	+	Missense_Mutation	SNP	G	G	A	.	.	LUAD		TCGA-67-6217-01A-11D-1753-08	TCGA-67-6217-10A-01D-1753-08	G	G	.	.	.	.	.	.	.	.	.	.	.	.	.	.	.	c.1474G>A	p.Asp492Asn	p.D492N	ENST00000305231	6/6	165	148	17	146	146	0	UGT2B7,missense_variant,p.Asp492Asn,ENST00000305231,;UGT2B7,3_prime_UTR_variant,,ENST00000508661,;UGT2B7,downstream_gene_variant,,ENST00000502942,;UGT2B7,downstream_gene_variant,,ENST00000509763,;	A
TCGA-69-7765-01A-11D-2167-08	UGT8	0	.	GRCh37	4	115544068	115544068	+	Missense_Mutation	SNP	T	T	C	.	.	LUAD		TCGA-69-7765-01A-11D-2167-08	TCGA-69-7765-10A-01D-2167-08	T	T	.	.	.	.	.	.	.	.	.	.	.	.	.	.	.	c.32T>C	p.Leu11Pro	p.L11P	ENST00000310836	2/6	37	33	4	43	43	0	UGT8,missense_variant,p.Leu11Pro,ENST00000507710,;UGT8,missense_variant,p.Leu11Pro,ENST00000310836,;UGT8,missense_variant,p.Leu11Pro,ENST00000394511,;	C
TCGA-69-7978-01A-11D-2184-08	UGT2B28	0	.	GRCh37	4	70146754	70146754	+	Missense_Mutation	SNP	C	C	A	rs558174566	.	LUAD		TCGA-69-7978-01A-11D-2184-08	TCGA-69-7978-10A-01D-2184-08	C	C	.	.	.	.	.	.	.	.	.	.	.	.	.	.	.	c.536C>A	p.Thr179Lys	p.T179K	ENST00000335568	1/6	151	139	12	121	121	0	UGT2B28,missense_variant,p.Thr179Lys,ENST00000511240,;UGT2B28,missense_variant,p.Thr179Lys,ENST00000335568,;	A
TCGA-69-7979-01A-11D-2184-08	UGT3A1	0	.	GRCh37	5	35988627	35988627	+	Silent	SNP	G	G	T	rs201087553	.	LUAD		TCGA-69-7979-01A-11D-2184-08	TCGA-69-7979-10A-01D-2184-08	G	G	.	.	.	.	.	.	.	.	.	.	.	.	.	.	.	c.121C>A	p.%3D	p.R41R	ENST00000274278	2/7	131	106	25	111	110	1	UGT3A1,synonymous_variant,p.%3D,ENST00000274278,;UGT3A1,synonymous_variant,p.%3D,ENST00000503189,;UGT3A1,5_prime_UTR_variant,,ENST00000333811,;UGT3A1,intron_variant,,ENST00000507113,;UGT3A1,intron_variant,,ENST00000513233,;UGT3A1,3_prime_UTR_variant,,ENST00000515801,;	T
TCGA-69-7980-01A-11D-2184-08	UGT1A3	0	.	GRCh37	2	234637790	234637790	+	Missense_Mutation	SNP	G	G	T	.	.	LUAD		TCGA-69-7980-01A-11D-2184-08	TCGA-69-7980-10A-01D-2184-08	G	G	.	.	.	.	.	.	.	.	.	.	.	.	.	.	.	c.18G>T	p.Gln6His	p.Q6H	ENST00000482026	1/5	112	99	12	121	121	0	UGT1A3,missense_variant,p.Gln6His,ENST00000482026,;UGT1A8,missense_variant,p.Gln6His,ENST00000609767,;UGT1A10,intron_variant,,ENST00000373445,;UGT1A4,intron_variant,,ENST00000373409,;UGT1A6,intron_variant,,ENST00000305139,;UGT1A6,intron_variant,,ENST00000373424,;UGT1A8,intron_variant,,ENST00000608381,;UGT1A7,intron_variant,,ENST00000373426,;UGT1A8,intron_variant,,ENST00000609637,;UGT1A5,intron_va…	T
TCGA-69-8253-01A-11D-2284-08	UGT2A2	0	.	GRCh37	4	70505031	70505031	+	Missense_Mutation	SNP	G	G	T	rs756886134	.	LUAD		TCGA-69-8253-01A-11D-2284-08	TCGA-69-8253-10A-01D-2284-08	G	G	.	.	.	.	.	.	.	.	.	.	.	.	.	.	.	c.328C>A	p.Pro110Thr	p.P110T	ENST00000457664	1/6	88	77	11	44	44	0	UGT2A2,missense_variant,p.Pro111Thr,ENST00000604021,;UGT2A2,missense_variant,p.Pro110Thr,ENST00000457664,;UGT2A1,missense_variant,p.Pro311Thr,ENST00000514019,;UGT2A2,missense_variant,p.Pro111Thr,ENST00000604629,;UGT2A1,intron_variant,,ENST00000286604,;UGT2A1,intron_variant,,ENST00000512704,;UGT2A1,intron_variant,,ENST00000503640,;	T
TCGA-69-8255-01A-11D-2284-08	UGT2B11	0	.	GRCh37	4	70080557	70080557	+	5'Flank	SNP	G	G	C	novel	.	LUAD		TCGA-69-8255-01A-11D-2284-08	TCGA-69-8255-10A-01D-2284-08	G	G	.	.	.	.	.	.	.	.	.	.	.	.	.	.	.	.	.	.	ENST00000446444	.	63	57	6	45	45	0	UGT2B11,upstream_gene_variant,,ENST00000446444,;RP11-704M14.1,non_coding_transcript_exon_variant,,ENST00000505646,;RP11-704M14.1,downstream_gene_variant,,ENST00000504301,;RP11-704M14.2,downstream_gene_variant,,ENST00000514003,;	C
TCGA-71-8520-01A-11D-2393-08	UGT2A1	0	.	GRCh37	4	70512956	70512956	+	Missense_Mutation	SNP	A	A	G	.	.	LUAD		TCGA-71-8520-01A-11D-2393-08	TCGA-71-8520-10A-01D-2393-08	A	A	.	.	.	.	.	.	.	.	.	.	.	.	.	.	.	c.407T>C	p.Met136Thr	p.M136T	ENST00000514019	2/7	118	106	12	101	101	0	UGT2A1,missense_variant,p.Met136Thr,ENST00000505512,;UGT2A1,missense_variant,p.Met136Thr,ENST00000286604,;UGT2A1,missense_variant,p.Met136Thr,ENST00000514019,;UGT2A1,missense_variant,p.Met136Thr,ENST00000512704,;UGT2A1,missense_variant,p.Met136Thr,ENST00000503640,;	G
TCGA-73-4658-01A-01D-1753-08	UGT1A8	0	.	GRCh37	2	234669105	234669105	+	Intron	SNP	G	G	T	novel	.	LUAD		TCGA-73-4658-01A-01D-1753-08	TCGA-73-4658-11A-01D-1753-08	G	G	.	.	.	.	.	.	.	.	.	.	.	.	.	.	.	c.868-6575G>T	.	.	ENST00000609767	.	110	102	8	100	100	0	UGT1A8,missense_variant,p.Val58Phe,ENST00000608383,;UGT1A8,missense_variant,p.Val58Phe,ENST00000360418,;UGT1A1,missense_variant,p.Val58Phe,ENST00000305208,;UGT1A10,intron_variant,,ENST00000373445,;UGT1A4,intron_variant,,ENST00000373409,;UGT1A6,intron_variant,,ENST00000305139,;UGT1A3,intron_variant,,ENST00000482026,;UGT1A6,intron_variant,,ENST00000373424,;UGT1A8,intron_variant,,ENST00000608381,;UG…	T
TCGA-73-4666-01A-01D-1265-08	UGT3A1	0	.	GRCh37	5	35954378	35954378	+	Missense_Mutation	SNP	T	T	C	rs757198568	.	LUAD		TCGA-73-4666-01A-01D-1265-08	TCGA-73-4666-11A-01D-1265-08	T	T	.	.	.	.	.	.	.	.	.	.	.	.	.	.	.	c.1498A>G	p.Met500Val	p.M500V	ENST00000274278	7/7	42	35	7	47	46	0	UGT3A1,missense_variant,p.Met500Val,ENST00000274278,;UGT3A1,downstream_gene_variant,,ENST00000507113,;UGT3A1,downstream_gene_variant,,ENST00000503189,;UGT3A1,downstream_gene_variant,,ENST00000513233,;UGT3A1,3_prime_UTR_variant,,ENST00000515801,;	C
TCGA-73-4668-01A-01D-1265-08	UGT2A3	0	.	GRCh37	4	69796403	69796403	+	Missense_Mutation	SNP	C	C	A	.	.	LUAD		TCGA-73-4668-01A-01D-1265-08	TCGA-73-4668-11A-01D-1265-08	C	C	.	.	.	.	.	.	.	.	.	.	.	.	.	.	.	c.1165G>T	p.Val389Leu	p.V389L	ENST00000251566	5/6	120	68	52	133	131	2	UGT2A3,missense_variant,p.Val389Leu,ENST00000251566,;UGT2A3,missense_variant,p.Val100Leu,ENST00000420231,;UGT2A3,3_prime_UTR_variant,,ENST00000503012,;	A
TCGA-73-4668-01A-01D-1265-08	UGT2B17	0	.	GRCh37	4	69417590	69417590	+	Missense_Mutation	SNP	C	C	A	novel	.	LUAD		TCGA-73-4668-01A-01D-1265-08	TCGA-73-4668-11A-01D-1265-08	C	C	.	.	.	.	.	.	.	.	.	.	.	.	.	.	.	c.1045G>T	p.Gly349Cys	p.G349C	ENST00000317746	4/6	50	24	26	59	59	0	UGT2B17,missense_variant,p.Gly349Cys,ENST00000317746,;	A
TCGA-73-4668-01A-01D-1265-08	UGT2B28	0	.	GRCh37	4	70156399	70156399	+	Missense_Mutation	SNP	C	C	A	novel	.	LUAD		TCGA-73-4668-01A-01D-1265-08	TCGA-73-4668-11A-01D-1265-08	C	C	.	.	.	.	.	.	.	.	.	.	.	.	.	.	.	c.1180C>A	p.Pro394Thr	p.P394T	ENST00000335568	5/6	220	119	100	174	173	1	UGT2B28,missense_variant,p.Pro394Thr,ENST00000335568,;UGT2B28,intron_variant,,ENST00000511240,;	A
TCGA-73-4668-01A-01D-1265-08	UGT2B28	0	.	GRCh37	4	70156400	70156400	+	Missense_Mutation	SNP	C	C	A	rs557930259	.	LUAD		TCGA-73-4668-01A-01D-1265-08	TCGA-73-4668-11A-01D-1265-08	C	C	.	.	.	.	.	.	.	.	.	.	.	.	.	.	.	c.1181C>A	p.Pro394Gln	p.P394Q	ENST00000335568	5/6	219	118	101	178	177	1	UGT2B28,missense_variant,p.Pro394Gln,ENST00000335568,;UGT2B28,intron_variant,,ENST00000511240,;	A
TCGA-73-4668-01A-01D-1265-08	UGT2B4	0	.	GRCh37	4	70346380	70346380	+	Missense_Mutation	SNP	C	C	A	rs757739776	.	LUAD		TCGA-73-4668-01A-01D-1265-08	TCGA-73-4668-11A-01D-1265-08	C	C	.	.	.	.	.	.	.	.	.	.	.	.	.	.	.	c.1559G>T	p.Arg520Ile	p.R520I	ENST00000305107	6/6	167	95	71	210	210	0	UGT2B4,missense_variant,p.Arg520Ile,ENST00000305107,;UGT2B4,missense_variant,p.Arg384Ile,ENST00000381096,;UGT2B4,3_prime_UTR_variant,,ENST00000512583,;AC108078.1,downstream_gene_variant,,ENST00000583573,;UGT2B4,non_coding_transcript_exon_variant,,ENST00000506580,;UGT2B4,downstream_gene_variant,,ENST00000502655,;	A
TCGA-73-4677-01A-01D-1265-08	UGT2B11	0	.	GRCh37	4	70080244	70080244	+	Missense_Mutation	SNP	G	G	C	.	.	LUAD		TCGA-73-4677-01A-01D-1265-08	TCGA-73-4677-11A-01D-1265-08	G	G	.	.	.	.	.	.	.	.	.	.	.	.	.	.	.	c.197C>G	p.Pro66Arg	p.P66R	ENST00000446444	1/6	212	145	66	161	161	0	UGT2B11,missense_variant,p.Pro66Arg,ENST00000446444,;RP11-704M14.1,non_coding_transcript_exon_variant,,ENST00000505646,;RP11-704M14.1,downstream_gene_variant,,ENST00000504301,;RP11-704M14.2,downstream_gene_variant,,ENST00000514003,;	C
TCGA-73-A9RS-01A-11D-A410-08	UGT1A4	0	.	GRCh37	2	234627534	234627534	+	Missense_Mutation	SNP	A	A	T	novel	.	LUAD		TCGA-73-A9RS-01A-11D-A410-08	TCGA-73-A9RS-10A-01D-A413-08	A	A	.	.	.	.	.	.	.	.	.	.	.	.	.	.	.	c.68A>T	p.Gln23Leu	p.Q23L	ENST00000373409	1/5	37	27	9	48	48	0	UGT1A4,missense_variant,p.Gln23Leu,ENST00000373409,;UGT1A10,intron_variant,,ENST00000373445,;UGT1A6,intron_variant,,ENST00000305139,;UGT1A6,intron_variant,,ENST00000373424,;UGT1A8,intron_variant,,ENST00000608381,;UGT1A7,intron_variant,,ENST00000373426,;UGT1A8,intron_variant,,ENST00000609637,;UGT1A5,intron_variant,,ENST00000373414,;UGT1A6,intron_variant,,ENST00000406651,;UGT1A10,intron_variant,,EN…	T
TCGA-73-A9RS-01A-11D-A410-08	UGT2A3	0	.	GRCh37	4	69795505	69795505	+	3'UTR	SNP	C	C	G	rs375404573	.	LUAD		TCGA-73-A9RS-01A-11D-A410-08	TCGA-73-A9RS-10A-01D-A413-08	C	C	.	.	.	.	.	.	.	.	.	.	.	.	.	.	.	c.*26G>C	.	.	ENST00000251566	6/6	96	54	42	84	84	0	UGT2A3,3_prime_UTR_variant,,ENST00000251566,;UGT2A3,3_prime_UTR_variant,,ENST00000420231,;UGT2A3,3_prime_UTR_variant,,ENST00000503012,;	G
TCGA-73-A9RS-01A-11D-A410-08	UGT2B11	0	.	GRCh37	4	70074081	70074081	+	Missense_Mutation	SNP	C	C	A	novel	.	LUAD		TCGA-73-A9RS-01A-11D-A410-08	TCGA-73-A9RS-10A-01D-A413-08	C	C	.	.	.	.	.	.	.	.	.	.	.	.	.	.	.	c.990G>T	p.Lys330Asn	p.K330N	ENST00000446444	3/6	255	172	82	246	246	0	UGT2B11,missense_variant,p.Lys330Asn,ENST00000446444,;RP11-704M14.1,intron_variant,,ENST00000504301,;RP11-704M14.1,intron_variant,,ENST00000505646,;UGT2B11,upstream_gene_variant,,ENST00000513315,;	A
TCGA-73-A9RS-01A-11D-A410-08	UGT2B7	0	.	GRCh37	4	69964287	69964287	+	Missense_Mutation	SNP	G	G	T	rs775847511	.	LUAD		TCGA-73-A9RS-01A-11D-A410-08	TCGA-73-A9RS-10A-01D-A413-08	G	G	.	.	.	.	.	.	.	.	.	.	.	.	.	.	.	c.751G>T	p.Gly251Trp	p.G251W	ENST00000305231	2/6	163	137	26	146	146	0	UGT2B7,missense_variant,p.Gly251Trp,ENST00000305231,;UGT2B7,missense_variant,p.Gly251Trp,ENST00000508661,;UGT2B7,missense_variant,p.Gly2Trp,ENST00000502942,;UGT2B7,non_coding_transcript_exon_variant,,ENST00000509763,;	T
TCGA-73-A9RS-01A-11D-A410-08	UGT3A1	0	.	GRCh37	5	35954472	35954472	+	Silent	SNP	C	C	A	rs200190501	.	LUAD		TCGA-73-A9RS-01A-11D-A410-08	TCGA-73-A9RS-10A-01D-A413-08	C	C	.	.	.	.	.	.	.	.	.	.	.	.	.	.	.	c.1404G>T	p.%3D	p.A468A	ENST00000274278	7/7	19	12	7	34	34	0	UGT3A1,synonymous_variant,p.%3D,ENST00000274278,;UGT3A1,downstream_gene_variant,,ENST00000507113,;UGT3A1,downstream_gene_variant,,ENST00000503189,;UGT3A1,downstream_gene_variant,,ENST00000513233,;UGT3A1,3_prime_UTR_variant,,ENST00000515801,;	A
TCGA-75-5122-01A-01D-1753-08	UGT2B11	0	.	GRCh37	4	70066243	70066243	+	Missense_Mutation	SNP	G	G	T	.	.	LUAD		TCGA-75-5122-01A-01D-1753-08	TCGA-75-5122-10A-01D-1753-08	G	G	.	.	.	.	.	.	.	.	.	.	.	.	.	.	.	c.1505C>A	p.Ala502Glu	p.A502E	ENST00000446444	6/6	91	84	7	96	96	0	UGT2B11,missense_variant,p.Ala502Glu,ENST00000446444,;RP11-704M14.1,non_coding_transcript_exon_variant,,ENST00000504301,;RP11-704M14.1,non_coding_transcript_exon_variant,,ENST00000505646,;UGT2B11,downstream_gene_variant,,ENST00000513315,;	T
TCGA-75-5122-01A-01D-1753-08	UGT2B11	0	.	GRCh37	4	70079941	70079941	+	Missense_Mutation	SNP	C	C	T	rs778177055	.	LUAD		TCGA-75-5122-01A-01D-1753-08	TCGA-75-5122-10A-01D-1753-08	C	C	.	.	.	.	.	.	.	.	.	.	.	.	.	.	.	c.500G>A	p.Arg167Gln	p.R167Q	ENST00000446444	1/6	40	35	5	73	73	0	UGT2B11,missense_variant,p.Arg167Gln,ENST00000446444,;RP11-704M14.1,intron_variant,,ENST00000504301,;RP11-704M14.1,intron_variant,,ENST00000505646,;RP11-704M14.2,downstream_gene_variant,,ENST00000514003,;	T
TCGA-75-5126-01A-01D-1753-08	UGT2B4	0	.	GRCh37	4	70346314	70346314	+	3'UTR	SNP	C	C	A	rs375773104	.	LUAD		TCGA-75-5126-01A-01D-1753-08	TCGA-75-5126-10A-01D-1753-08	C	C	.	.	.	.	.	.	.	.	.	.	.	.	.	.	.	c.*38G>T	.	.	ENST00000305107	6/6	64	55	8	115	115	0	UGT2B4,3_prime_UTR_variant,,ENST00000305107,;UGT2B4,3_prime_UTR_variant,,ENST00000512583,;UGT2B4,3_prime_UTR_variant,,ENST00000381096,;AC108078.1,downstream_gene_variant,,ENST00000583573,;UGT2B4,non_coding_transcript_exon_variant,,ENST00000506580,;UGT2B4,downstream_gene_variant,,ENST00000502655,;	A
TCGA-75-5126-01A-01D-1753-08	UGT3A2	0	.	GRCh37	5	36052050	36052050	+	Missense_Mutation	SNP	C	C	A	.	.	LUAD		TCGA-75-5126-01A-01D-1753-08	TCGA-75-5126-10A-01D-1753-08	C	C	.	.	.	.	.	.	.	.	.	.	.	.	.	.	.	c.233G>T	p.Ser78Ile	p.S78I	ENST00000282507	3/7	60	55	4	83	83	0	UGT3A2,missense_variant,p.Ser44Ile,ENST00000513300,;UGT3A2,missense_variant,p.Ser78Ile,ENST00000515131,;UGT3A2,missense_variant,p.Ser78Ile,ENST00000282507,;UGT3A2,5_prime_UTR_variant,,ENST00000545528,;UGT3A2,non_coding_transcript_exon_variant,,ENST00000504954,;UGT3A2,missense_variant,p.Ser78Ile,ENST00000504685,;	A
TCGA-75-6206-01A-11D-1753-08	UGT2A2	0	.	GRCh37	4	70504968	70504968	+	Missense_Mutation	SNP	T	T	A	novel	.	LUAD		TCGA-75-6206-01A-11D-1753-08	TCGA-75-6206-10A-01D-1753-08	T	T	.	.	.	.	.	.	.	.	.	.	.	.	.	.	.	c.391A>T	p.Asn131Tyr	p.N131Y	ENST00000457664	1/6	87	39	48	79	79	0	UGT2A2,missense_variant,p.Asn132Tyr,ENST00000604021,;UGT2A2,missense_variant,p.Asn131Tyr,ENST00000457664,;UGT2A1,missense_variant,p.Asn332Tyr,ENST00000514019,;UGT2A2,missense_variant,p.Asn132Tyr,ENST00000604629,;UGT2A1,intron_variant,,ENST00000286604,;UGT2A1,intron_variant,,ENST00000512704,;UGT2A1,intron_variant,,ENST00000503640,;	A
TCGA-75-6206-01A-11D-1753-08	UGT3A1	0	.	GRCh37	5	35965591	35965591	+	Nonsense_Mutation	SNP	C	C	T	.	.	LUAD		TCGA-75-6206-01A-11D-1753-08	TCGA-75-6206-10A-01D-1753-08	C	C	.	.	.	.	.	.	.	.	.	.	.	.	.	.	.	c.740G>A	p.Trp247Ter	p.W247*	ENST00000274278	4/7	105	82	23	90	89	1	UGT3A1,stop_gained,p.Trp247Ter,ENST00000274278,;UGT3A1,stop_gained,p.Trp213Ter,ENST00000507113,;UGT3A1,stop_gained,p.Trp193Ter,ENST00000333811,;UGT3A1,stop_gained,p.Trp247Ter,ENST00000503189,;UGT3A1,intron_variant,,ENST00000513233,;UGT3A1,3_prime_UTR_variant,,ENST00000515801,;	T
TCGA-75-7027-01A-11D-1945-08	UGT2B7	0	.	GRCh37	4	69962246	69962246	+	Missense_Mutation	SNP	T	T	C	.	.	LUAD		TCGA-75-7027-01A-11D-1945-08	TCGA-75-7027-10A-01D-1946-08	T	T	.	.	.	.	.	.	.	.	.	.	.	.	.	.	.	c.8T>C	p.Val3Ala	p.V3A	ENST00000305231	1/6	124	84	40	175	175	0	UGT2B7,missense_variant,p.Val3Ala,ENST00000305231,;UGT2B7,missense_variant,p.Val3Ala,ENST00000508661,;UGT2B7,intron_variant,,ENST00000502942,;UGT2B7,intron_variant,,ENST00000509763,;	C
TCGA-75-7030-01A-11D-1945-08	UGT2B4	0	.	GRCh37	4	70355193	70355193	+	Silent	SNP	A	A	G	.	.	LUAD		TCGA-75-7030-01A-11D-1945-08	TCGA-75-7030-10A-01D-1946-08	A	A	.	.	.	.	.	.	.	.	.	.	.	.	.	.	.	c.966T>C	p.%3D	p.N322N	ENST00000305107	3/6	227	218	9	137	137	0	UGT2B4,synonymous_variant,p.%3D,ENST00000305107,;UGT2B4,synonymous_variant,p.%3D,ENST00000512583,;UGT2B4,synonymous_variant,p.%3D,ENST00000381096,;UGT2B4,non_coding_transcript_exon_variant,,ENST00000506580,;UGT2B4,non_coding_transcript_exon_variant,,ENST00000502655,;UGT2B4,downstream_gene_variant,,ENST00000503836,;	G
TCGA-75-7031-01A-11D-1945-08	UGT2B4	0	.	GRCh37	4	70361289	70361289	+	Nonsense_Mutation	SNP	C	C	T	.	.	LUAD		TCGA-75-7031-01A-11D-1945-08	TCGA-75-7031-10A-01D-1946-08	C	C	.	.	.	.	.	.	.	.	.	.	.	.	.	.	.	c.291G>A	p.Trp97Ter	p.W97*	ENST00000305107	1/6	30	25	5	41	41	0	UGT2B4,stop_gained,p.Trp97Ter,ENST00000305107,;UGT2B4,stop_gained,p.Trp97Ter,ENST00000512583,;UGT2B4,intron_variant,,ENST00000381096,;UGT2B4,downstream_gene_variant,,ENST00000510114,;UGT2B4,non_coding_transcript_exon_variant,,ENST00000506580,;UGT2B4,intron_variant,,ENST00000503836,;UGT2B4,intron_variant,,ENST00000502655,;	T
TCGA-78-7149-01A-11D-2036-08	UGT2B15	0	.	GRCh37	4	69512768	69512768	+	3'UTR	SNP	A	A	C	novel	.	LUAD		TCGA-78-7149-01A-11D-2036-08	TCGA-78-7149-10A-01D-2036-08	A	A	.	.	.	.	.	.	.	.	.	.	.	.	.	.	.	c.*54T>G	.	.	ENST00000338206	6/6	81	38	42	69	69	0	UGT2B15,3_prime_UTR_variant,,ENST00000338206,;	C
TCGA-78-7150-01A-21D-2036-08	UGT1A7	0	.	GRCh37	2	234590805	234590805	+	Silent	SNP	G	G	A	.	.	LUAD		TCGA-78-7150-01A-21D-2036-08	TCGA-78-7150-10A-01D-2036-08	G	G	.	.	.	.	.	.	.	.	.	.	.	.	.	.	.	c.222G>A	p.%3D	p.V74V	ENST00000373426	1/5	218	194	24	175	175	0	UGT1A7,synonymous_variant,p.%3D,ENST00000373426,;UGT1A10,intron_variant,,ENST00000373445,;UGT1A10,intron_variant,,ENST00000344644,;UGT1A8,intron_variant,,ENST00000373450,;UGT1A8,intron_variant,,ENST00000609637,;UGT1A9,intron_variant,,ENST00000354728,;UGT1A7,upstream_gene_variant,,ENST00000485022,;	A
TCGA-78-7150-01A-21D-2036-08	UGT2B11	0	.	GRCh37	4	70074182	70074182	+	Missense_Mutation	SNP	G	G	C	rs779173594	.	LUAD		TCGA-78-7150-01A-21D-2036-08	TCGA-78-7150-10A-01D-2036-08	G	G	.	.	.	.	.	.	.	.	.	.	.	.	.	.	.	c.889C>G	p.Gln297Glu	p.Q297E	ENST00000446444	3/6	187	155	31	179	179	0	UGT2B11,missense_variant,p.Gln297Glu,ENST00000446444,;RP11-704M14.1,intron_variant,,ENST00000504301,;RP11-704M14.1,intron_variant,,ENST00000505646,;UGT2B11,upstream_gene_variant,,ENST00000513315,;	C
TCGA-78-7154-01A-11D-2036-08	UGT1A9	0	.	GRCh37	2	234581085	234581085	+	Missense_Mutation	SNP	G	G	A	rs372244167	.	LUAD		TCGA-78-7154-01A-11D-2036-08	TCGA-78-7154-10A-01D-2036-08	G	G	.	.	.	.	.	.	.	.	.	.	.	.	.	.	.	c.505G>A	p.Ala169Thr	p.A169T	ENST00000354728	1/5	244	210	34	248	248	0	UGT1A8,missense_variant,p.Ala169Thr,ENST00000609637,;UGT1A9,missense_variant,p.Ala169Thr,ENST00000354728,;UGT1A10,intron_variant,,ENST00000373445,;UGT1A10,intron_variant,,ENST00000344644,;UGT1A8,intron_variant,,ENST00000373450,;	A
TCGA-78-7154-01A-11D-2036-08	UGT2B7	0	.	GRCh37	4	69978250	69978250	+	Silent	SNP	C	C	T	.	.	LUAD		TCGA-78-7154-01A-11D-2036-08	TCGA-78-7154-10A-01D-2036-08	C	C	.	.	.	.	.	.	.	.	.	.	.	.	.	.	.	c.1386C>T	p.%3D	p.F462F	ENST00000305231	6/6	118	89	28	228	228	0	UGT2B7,synonymous_variant,p.%3D,ENST00000305231,;UGT2B7,3_prime_UTR_variant,,ENST00000508661,;UGT2B7,downstream_gene_variant,,ENST00000502942,;UGT2B7,non_coding_transcript_exon_variant,,ENST00000509763,;	T
TCGA-78-7155-01A-11D-2036-08	UGT2B28	0	.	GRCh37	4	70155468	70155468	+	Missense_Mutation	SNP	T	T	G	.	.	LUAD		TCGA-78-7155-01A-11D-2036-08	TCGA-78-7155-10A-01D-2036-08	T	T	.	.	.	.	.	.	.	.	.	.	.	.	.	.	.	c.1088T>G	p.Leu363Arg	p.L363R	ENST00000335568	4/6	68	45	23	107	107	0	UGT2B28,missense_variant,p.Leu363Arg,ENST00000335568,;UGT2B28,intron_variant,,ENST00000511240,;	G
TCGA-78-7155-01A-11D-2036-08	UGT2B28	0	.	GRCh37	4	70156323	70156323	+	Silent	SNP	C	C	G	.	.	LUAD		TCGA-78-7155-01A-11D-2036-08	TCGA-78-7155-10A-01D-2036-08	C	C	.	.	.	.	.	.	.	.	.	.	.	.	.	.	.	c.1104C>G	p.%3D	p.T368T	ENST00000335568	5/6	71	46	25	95	95	0	UGT2B28,synonymous_variant,p.%3D,ENST00000335568,;UGT2B28,intron_variant,,ENST00000511240,;	G
TCGA-78-7155-01A-11D-2036-08	UGT3A1	0	.	GRCh37	5	35968221	35968221	+	Nonsense_Mutation	SNP	C	C	A	rs754987941	.	LUAD		TCGA-78-7155-01A-11D-2036-08	TCGA-78-7155-10A-01D-2036-08	C	C	.	.	.	.	.	.	.	.	.	.	.	.	.	.	.	c.211G>T	p.Glu71Ter	p.E71*	ENST00000274278	3/7	44	18	25	34	34	0	UGT3A1,stop_gained,p.Glu71Ter,ENST00000274278,;UGT3A1,stop_gained,p.Glu37Ter,ENST00000507113,;UGT3A1,stop_gained,p.Glu17Ter,ENST00000333811,;UGT3A1,stop_gained,p.Glu71Ter,ENST00000503189,;UGT3A1,intron_variant,,ENST00000513233,;UGT3A1,3_prime_UTR_variant,,ENST00000515801,;	A
TCGA-78-7155-01A-11D-2036-08	UGT3A2	0	.	GRCh37	5	36035965	36035965	+	Silent	SNP	C	C	A	rs138782726	.	LUAD		TCGA-78-7155-01A-11D-2036-08	TCGA-78-7155-10A-01D-2036-08	C	C	.	.	.	.	.	.	.	.	.	.	.	.	.	.	.	c.1407G>T	p.%3D	p.T469T	ENST00000282507	7/7	86	50	35	38	38	0	UGT3A2,synonymous_variant,p.%3D,ENST00000513300,;UGT3A2,synonymous_variant,p.%3D,ENST00000545528,;UGT3A2,synonymous_variant,p.%3D,ENST00000282507,;UGT3A2,downstream_gene_variant,,ENST00000504954,;UGT3A2,3_prime_UTR_variant,,ENST00000504685,;	A
TCGA-78-7155-01A-11D-2036-08	UGT3A2	0	.	GRCh37	5	36052023	36052023	+	Missense_Mutation	SNP	C	C	A	.	.	LUAD		TCGA-78-7155-01A-11D-2036-08	TCGA-78-7155-10A-01D-2036-08	C	C	.	.	.	.	.	.	.	.	.	.	.	.	.	.	.	c.260G>T	p.Arg87Ile	p.R87I	ENST00000282507	3/7	84	76	8	45	45	0	UGT3A2,missense_variant,p.Arg53Ile,ENST00000513300,;UGT3A2,missense_variant,p.Arg87Ile,ENST00000515131,;UGT3A2,missense_variant,p.Arg87Ile,ENST00000282507,;UGT3A2,5_prime_UTR_variant,,ENST00000545528,;UGT3A2,non_coding_transcript_exon_variant,,ENST00000504954,;UGT3A2,missense_variant,p.Arg87Ile,ENST00000504685,;	A
TCGA-78-7159-01A-11D-2036-08	UGT8	0	.	GRCh37	4	115585282	115585282	+	Silent	SNP	A	A	G	.	.	LUAD		TCGA-78-7159-01A-11D-2036-08	TCGA-78-7159-10A-01D-2036-08	A	A	.	.	.	.	.	.	.	.	.	.	.	.	.	.	.	c.954A>G	p.%3D	p.K318K	ENST00000310836	3/6	38	31	7	44	44	0	UGT8,synonymous_variant,p.%3D,ENST00000310836,;UGT8,synonymous_variant,p.%3D,ENST00000394511,;	G
TCGA-78-7160-01A-11D-2036-08	UGT1A10	0	.	GRCh37	2	234545239	234545239	+	Missense_Mutation	SNP	A	A	G	.	.	LUAD		TCGA-78-7160-01A-11D-2036-08	TCGA-78-7160-10A-01D-2036-08	A	A	.	.	.	.	.	.	.	.	.	.	.	.	.	.	.	c.71A>G	p.Glu24Gly	p.E24G	ENST00000344644	1/5	125	109	16	124	124	0	UGT1A10,missense_variant,p.Glu24Gly,ENST00000373445,;UGT1A10,missense_variant,p.Glu24Gly,ENST00000344644,;UGT1A8,intron_variant,,ENST00000373450,;	G
TCGA-78-7160-01A-11D-2036-08	UGT2B15	0	.	GRCh37	4	69519925	69519925	+	Silent	SNP	G	G	T	.	.	LUAD		TCGA-78-7160-01A-11D-2036-08	TCGA-78-7160-10A-01D-2036-08	G	G	.	.	.	.	.	.	.	.	.	.	.	.	.	.	.	c.1143C>A	p.%3D	p.I381I	ENST00000338206	5/6	151	141	9	195	195	0	UGT2B15,synonymous_variant,p.%3D,ENST00000338206,;	T
TCGA-78-7162-01A-21D-2063-08	UGT1A5	0	.	GRCh37	2	234622444	234622444	+	Silent	SNP	C	C	A	.	.	LUAD		TCGA-78-7162-01A-21D-2063-08	TCGA-78-7162-11A-01D-2063-08	C	C	.	.	.	.	.	.	.	.	.	.	.	.	.	.	.	c.807C>A	p.%3D	p.I269I	ENST00000373414	1/5	237	194	43	195	195	0	UGT1A8,synonymous_variant,p.%3D,ENST00000608381,;UGT1A5,synonymous_variant,p.%3D,ENST00000373414,;UGT1A10,intron_variant,,ENST00000373445,;UGT1A6,intron_variant,,ENST00000305139,;UGT1A6,intron_variant,,ENST00000373424,;UGT1A7,intron_variant,,ENST00000373426,;UGT1A8,intron_variant,,ENST00000609637,;UGT1A6,intron_variant,,ENST00000406651,;UGT1A10,intron_variant,,ENST00000344644,;UGT1A8,intron_varia…	A
TCGA-78-7166-01A-12D-2063-08	UGT1A5	0	.	GRCh37	2	234622463	234622463	+	Missense_Mutation	SNP	A	A	T	rs776318563	.	LUAD		TCGA-78-7166-01A-12D-2063-08	TCGA-78-7166-11A-01D-2063-08	A	A	.	.	.	.	.	.	.	.	.	.	.	.	.	.	.	c.826A>T	p.Ile276Phe	p.I276F	ENST00000373414	1/5	170	116	54	185	185	0	UGT1A8,missense_variant,p.Ile276Phe,ENST00000608381,;UGT1A5,missense_variant,p.Ile276Phe,ENST00000373414,;UGT1A10,intron_variant,,ENST00000373445,;UGT1A6,intron_variant,,ENST00000305139,;UGT1A6,intron_variant,,ENST00000373424,;UGT1A7,intron_variant,,ENST00000373426,;UGT1A8,intron_variant,,ENST00000609637,;UGT1A6,intron_variant,,ENST00000406651,;UGT1A10,intron_variant,,ENST00000344644,;UGT1A8,intr…	T
TCGA-78-7535-01A-11D-2063-08	UGT1A10	0	.	GRCh37	2	234545158	234545158	+	5'UTR	SNP	G	G	A	novel	.	LUAD		TCGA-78-7535-01A-11D-2063-08	TCGA-78-7535-10A-01D-2063-08	G	G	.	.	.	.	.	.	.	.	.	.	.	.	.	.	.	c.-11G>A	.	.	ENST00000344644	1/5	79	53	25	92	92	0	UGT1A10,5_prime_UTR_variant,,ENST00000373445,;UGT1A10,5_prime_UTR_variant,,ENST00000344644,;UGT1A8,intron_variant,,ENST00000373450,;	A
TCGA-78-7536-01A-11D-2063-08	UGT1A3	0	.	GRCh37	2	234638412	234638412	+	Missense_Mutation	SNP	A	A	T	.	.	LUAD		TCGA-78-7536-01A-11D-2063-08	TCGA-78-7536-10A-01D-2063-08	A	A	.	.	.	.	.	.	.	.	.	.	.	.	.	.	.	c.640A>T	p.Met214Leu	p.M214L	ENST00000482026	1/5	204	142	62	257	257	0	UGT1A3,missense_variant,p.Met214Leu,ENST00000482026,;UGT1A8,missense_variant,p.Met214Leu,ENST00000609767,;UGT1A10,intron_variant,,ENST00000373445,;UGT1A4,intron_variant,,ENST00000373409,;UGT1A6,intron_variant,,ENST00000305139,;UGT1A6,intron_variant,,ENST00000373424,;UGT1A8,intron_variant,,ENST00000608381,;UGT1A7,intron_variant,,ENST00000373426,;UGT1A8,intron_variant,,ENST00000609637,;UGT1A5,intro…	T
TCGA-78-7539-01A-11D-2063-08	UGT2B28	0	.	GRCh37	4	70156375	70156375	+	Missense_Mutation	SNP	C	C	A	.	.	LUAD		TCGA-78-7539-01A-11D-2063-08	TCGA-78-7539-10A-01D-2063-08	C	C	.	.	.	.	.	.	.	.	.	.	.	.	.	.	.	c.1156C>A	p.His386Asn	p.H386N	ENST00000335568	5/6	542	501	40	187	187	0	UGT2B28,missense_variant,p.His386Asn,ENST00000335568,;UGT2B28,intron_variant,,ENST00000511240,;	A
TCGA-78-8640-01A-11D-2393-08	UGT1A4	0	.	GRCh37	2	234628226	234628226	+	Missense_Mutation	SNP	G	G	C	rs369777528	.	LUAD		TCGA-78-8640-01A-11D-2393-08	TCGA-78-8640-11A-01D-2393-08	G	G	.	.	.	.	.	.	.	.	.	.	.	.	.	.	.	c.760G>C	p.Val254Leu	p.V254L	ENST00000373409	1/5	350	318	31	296	296	0	UGT1A4,missense_variant,p.Val254Leu,ENST00000373409,;UGT1A10,intron_variant,,ENST00000373445,;UGT1A6,intron_variant,,ENST00000305139,;UGT1A6,intron_variant,,ENST00000373424,;UGT1A8,intron_variant,,ENST00000608381,;UGT1A7,intron_variant,,ENST00000373426,;UGT1A8,intron_variant,,ENST00000609637,;UGT1A5,intron_variant,,ENST00000373414,;UGT1A6,intron_variant,,ENST00000406651,;UGT1A10,intron_variant,,E…	C
TCGA-78-8640-01A-11D-2393-08	UGT2A3	0	.	GRCh37	4	69796263	69796263	+	Splice_Site	SNP	C	C	A	rs146748259	.	LUAD		TCGA-78-8640-01A-11D-2393-08	TCGA-78-8640-11A-01D-2393-08	C	C	.	.	.	.	.	.	.	.	.	.	.	.	.	.	.	c.1304+1G>T	.	p.X435_splice	ENST00000251566	.	139	123	16	235	235	0	UGT2A3,splice_donor_variant,,ENST00000251566,;UGT2A3,splice_donor_variant,,ENST00000420231,;UGT2A3,splice_donor_variant,,ENST00000503012,;	A
TCGA-78-8640-01A-11D-2393-08	UGT2B4	0	.	GRCh37	4	70361605	70361605	+	5'UTR	SNP	C	C	A	novel	.	LUAD		TCGA-78-8640-01A-11D-2393-08	TCGA-78-8640-11A-01D-2393-08	C	C	.	.	.	.	.	.	.	.	.	.	.	.	.	.	.	c.-26G>T	.	.	ENST00000305107	1/6	144	121	23	200	200	0	UGT2B4,5_prime_UTR_variant,,ENST00000510114,;UGT2B4,5_prime_UTR_variant,,ENST00000305107,;UGT2B4,intron_variant,,ENST00000381096,;UGT2B4,upstream_gene_variant,,ENST00000512583,;UGT2B4,non_coding_transcript_exon_variant,,ENST00000506580,;UGT2B4,intron_variant,,ENST00000503836,;UGT2B4,intron_variant,,ENST00000502655,;	A
TCGA-78-8640-01A-11D-2393-08	UGT3A1	0	.	GRCh37	5	35954297	35954297	+	3'UTR	SNP	C	C	A	rs764027392	.	LUAD		TCGA-78-8640-01A-11D-2393-08	TCGA-78-8640-11A-01D-2393-08	C	C	.	.	.	.	.	.	.	.	.	.	.	.	.	.	.	c.*7G>T	.	.	ENST00000274278	7/7	100	86	13	68	68	0	UGT3A1,3_prime_UTR_variant,,ENST00000274278,;UGT3A1,downstream_gene_variant,,ENST00000507113,;UGT3A1,downstream_gene_variant,,ENST00000503189,;UGT3A1,downstream_gene_variant,,ENST00000513233,;UGT3A1,3_prime_UTR_variant,,ENST00000515801,;	A
TCGA-78-8640-01A-11D-2393-08	UGT8	0	.	GRCh37	4	115544098	115544098	+	Missense_Mutation	SNP	C	C	A	novel	.	LUAD		TCGA-78-8640-01A-11D-2393-08	TCGA-78-8640-11A-01D-2393-08	C	C	.	.	.	.	.	.	.	.	.	.	.	.	.	.	.	c.62C>A	p.Ala21Asp	p.A21D	ENST00000310836	2/6	46	40	6	62	62	0	UGT8,missense_variant,p.Ala21Asp,ENST00000507710,;UGT8,missense_variant,p.Ala21Asp,ENST00000310836,;UGT8,missense_variant,p.Ala21Asp,ENST00000394511,;	A
TCGA-78-8655-01A-11D-2393-08	UGT2A3	0	.	GRCh37	4	69817274	69817274	+	Missense_Mutation	SNP	G	G	T	novel	.	LUAD		TCGA-78-8655-01A-11D-2393-08	TCGA-78-8655-10A-01D-2393-08	G	G	.	.	.	.	.	.	.	.	.	.	.	.	.	.	.	c.205C>A	p.Pro69Thr	p.P69T	ENST00000251566	1/6	86	55	31	149	149	0	UGT2A3,missense_variant,p.Pro69Thr,ENST00000251566,;UGT2A3,upstream_gene_variant,,ENST00000420231,;UGT2A3,upstream_gene_variant,,ENST00000503012,;	T
TCGA-78-8660-01A-11D-2393-08	UGT2B4	0	.	GRCh37	4	70352325	70352325	+	Splice_Site	SNP	A	A	T	novel	.	LUAD		TCGA-78-8660-01A-11D-2393-08	TCGA-78-8660-10A-01D-2393-08	A	A	.	.	.	.	.	.	.	.	.	.	.	.	.	.	.	c.1090+2T>A	.	p.X364_splice	ENST00000305107	.	211	180	31	127	127	0	UGT2B4,splice_donor_variant,,ENST00000305107,;UGT2B4,splice_donor_variant,,ENST00000512583,;UGT2B4,splice_donor_variant,,ENST00000381096,;UGT2B4,splice_donor_variant,,ENST00000506580,;UGT2B4,splice_donor_variant,,ENST00000502655,;UGT2B4,downstream_gene_variant,,ENST00000503836,;	T
TCGA-78-8662-01A-11D-2393-08	UGT3A2	0	.	GRCh37	5	36035968	36035968	+	Silent	SNP	C	C	T	rs373801136	.	LUAD		TCGA-78-8662-01A-11D-2393-08	TCGA-78-8662-10A-01D-2393-08	C	C	.	.	.	.	.	.	.	.	.	.	.	.	.	.	.	c.1404G>A	p.%3D	p.A468A	ENST00000282507	7/7	58	30	28	68	68	0	UGT3A2,synonymous_variant,p.%3D,ENST00000513300,;UGT3A2,synonymous_variant,p.%3D,ENST00000545528,;UGT3A2,synonymous_variant,p.%3D,ENST00000282507,;UGT3A2,downstream_gene_variant,,ENST00000504954,;UGT3A2,3_prime_UTR_variant,,ENST00000504685,;	T
TCGA-80-5608-01A-31D-1945-08	UGT1A10	0	.	GRCh37	2	234546000	234546000	+	Missense_Mutation	SNP	C	C	A	.	.	LUAD		TCGA-80-5608-01A-31D-1945-08	TCGA-80-5608-10A-01D-1946-08	C	C	.	.	.	.	.	.	.	.	.	.	.	.	.	.	.	c.832C>A	p.His278Asn	p.H278N	ENST00000344644	1/5	325	242	83	231	230	1	UGT1A10,missense_variant,p.His278Asn,ENST00000373445,;UGT1A10,missense_variant,p.His278Asn,ENST00000344644,;UGT1A8,intron_variant,,ENST00000373450,;	A
TCGA-80-5611-01A-01D-1625-08	UGT1A6	0	.	GRCh37	2	234602290	234602290	+	Missense_Mutation	SNP	G	G	C	rs775312118	.	LUAD		TCGA-80-5611-01A-01D-1625-08	TCGA-80-5611-10A-01D-1625-08	G	G	.	.	.	.	.	.	.	.	.	.	.	.	.	.	.	c.640G>C	p.Val214Leu	p.V214L	ENST00000305139	1/5	128	108	20	125	125	0	UGT1A6,missense_variant,p.Val214Leu,ENST00000305139,;UGT1A10,intron_variant,,ENST00000373445,;UGT1A6,intron_variant,,ENST00000373424,;UGT1A7,intron_variant,,ENST00000373426,;UGT1A8,intron_variant,,ENST00000609637,;UGT1A10,intron_variant,,ENST00000344644,;UGT1A8,intron_variant,,ENST00000373450,;UGT1A9,intron_variant,,ENST00000354728,;UGT1A6,downstream_gene_variant,,ENST00000441351,;UGT1A7,downstre…	C
TCGA-86-6851-01A-11D-1945-08	UGT1A10	0	.	GRCh37	2	234677057	234677057	+	Missense_Mutation	SNP	G	G	T	rs750232648	.	LUAD		TCGA-86-6851-01A-11D-1945-08	TCGA-86-6851-10A-01D-1946-08	G	G	.	.	.	.	.	.	.	.	.	.	.	.	.	.	.	c.1267G>T	p.Ala423Ser	p.A423S	ENST00000344644	4/5	24	19	5	39	39	0	UGT1A10,missense_variant,p.Ala423Ser,ENST00000373445,;UGT1A4,missense_variant,p.Ala427Ser,ENST00000373409,;UGT1A6,missense_variant,p.Ala425Ser,ENST00000305139,;UGT1A3,missense_variant,p.Ala427Ser,ENST00000482026,;UGT1A6,missense_variant,p.Ala158Ser,ENST00000373424,;UGT1A8,missense_variant,p.Ala426Ser,ENST00000608383,;UGT1A8,missense_variant,p.Ala427Ser,ENST00000608381,;UGT1A7,missense_variant,p.A…	T
TCGA-86-6851-01A-11D-1945-08	UGT2B28	0	.	GRCh37	4	70146396	70146396	+	Missense_Mutation	SNP	G	G	T	.	.	LUAD		TCGA-86-6851-01A-11D-1945-08	TCGA-86-6851-10A-01D-1946-08	G	G	.	.	.	.	.	.	.	.	.	.	.	.	.	.	.	c.178G>T	p.Ala60Ser	p.A60S	ENST00000335568	1/6	231	139	91	137	136	1	UGT2B28,missense_variant,p.Ala60Ser,ENST00000511240,;UGT2B28,missense_variant,p.Ala60Ser,ENST00000335568,;	T
TCGA-86-6851-01A-11D-1945-08	UGT3A2	0	.	GRCh37	5	36049077	36049077	+	Missense_Mutation	SNP	A	A	T	.	.	LUAD		TCGA-86-6851-01A-11D-1945-08	TCGA-86-6851-10A-01D-1946-08	A	A	.	.	.	.	.	.	.	.	.	.	.	.	.	.	.	c.757T>A	p.Phe253Ile	p.F253I	ENST00000282507	4/7	131	109	22	78	78	0	UGT3A2,missense_variant,p.Phe219Ile,ENST00000513300,;UGT3A2,missense_variant,p.Phe253Ile,ENST00000282507,;UGT3A2,intron_variant,,ENST00000545528,;UGT3A2,downstream_gene_variant,,ENST00000515131,;UGT3A2,intron_variant,,ENST00000504954,;UGT3A2,intron_variant,,ENST00000504685,;	T
TCGA-86-7701-01A-11D-2167-08	UGT2B15	0	.	GRCh37	4	69512953	69512953	+	Missense_Mutation	SNP	G	G	T	.	.	LUAD		TCGA-86-7701-01A-11D-2167-08	TCGA-86-7701-10A-01D-2167-08	G	G	.	.	.	.	.	.	.	.	.	.	.	.	.	.	.	c.1462C>A	p.Gln488Lys	p.Q488K	ENST00000338206	6/6	141	116	24	107	107	0	UGT2B15,missense_variant,p.Gln488Lys,ENST00000338206,;	T
TCGA-86-7701-01A-11D-2167-08	UGT2B28	0	.	GRCh37	4	70146308	70146308	+	Silent	SNP	C	C	A	rs150706540	.	LUAD		TCGA-86-7701-01A-11D-2167-08	TCGA-86-7701-10A-01D-2167-08	C	C	.	.	.	.	.	.	.	.	.	.	.	.	.	.	.	c.90C>A	p.%3D	p.T30T	ENST00000335568	1/6	277	240	37	167	167	0	UGT2B28,synonymous_variant,p.%3D,ENST00000511240,;UGT2B28,synonymous_variant,p.%3D,ENST00000335568,;	A
TCGA-86-7711-01A-11D-2063-08	UGT3A1	0	.	GRCh37	5	35955944	35955944	+	Frame_Shift_Del	DEL	A	A	-	novel	.	LUAD		TCGA-86-7711-01A-11D-2063-08	TCGA-86-7711-10A-01D-2063-08	A	A	.	.	.	.	.	.	.	.	.	.	.	.	.	.	.	c.1098delT	p.Phe366LeufsTer10	p.F366Lfs*10	ENST00000274278	6/7	139	110	29	62	62	0	UGT3A1,frameshift_variant,p.Phe366LeufsTer10,ENST00000274278,;UGT3A1,frameshift_variant,p.Phe332LeufsTer10,ENST00000507113,;UGT3A1,frameshift_variant,p.Phe366LeufsTer10,ENST00000503189,;UGT3A1,downstream_gene_variant,,ENST00000333811,;UGT3A1,non_coding_transcript_exon_variant,,ENST00000513233,;UGT3A1,3_prime_UTR_variant,,ENST00000515801,;	-
TCGA-86-7711-01A-11D-2063-08	UGT3A2	0	.	GRCh37	5	36035966	36035966	+	Missense_Mutation	SNP	G	G	A	rs199567567	.	LUAD		TCGA-86-7711-01A-11D-2063-08	TCGA-86-7711-10A-01D-2063-08	G	G	.	.	.	.	.	.	.	.	.	.	.	.	.	.	.	c.1406C>T	p.Thr469Met	p.T469M	ENST00000282507	7/7	57	49	8	23	23	0	UGT3A2,missense_variant,p.Thr435Met,ENST00000513300,;UGT3A2,missense_variant,p.Thr167Met,ENST00000545528,;UGT3A2,missense_variant,p.Thr469Met,ENST00000282507,;UGT3A2,downstream_gene_variant,,ENST00000504954,;UGT3A2,3_prime_UTR_variant,,ENST00000504685,;	A
TCGA-86-7953-01A-11D-2184-08	UGT3A2	0	.	GRCh37	5	36036073	36036073	+	Nonsense_Mutation	SNP	G	G	C	rs372846961	.	LUAD		TCGA-86-7953-01A-11D-2184-08	TCGA-86-7953-10A-01D-2184-08	G	G	.	.	.	.	.	.	.	.	.	.	.	.	.	.	.	c.1299C>G	p.Tyr433Ter	p.Y433*	ENST00000282507	7/7	114	110	4	67	67	0	UGT3A2,stop_gained,p.Tyr399Ter,ENST00000513300,;UGT3A2,stop_gained,p.Tyr131Ter,ENST00000545528,;UGT3A2,stop_gained,p.Tyr433Ter,ENST00000282507,;UGT3A2,downstream_gene_variant,,ENST00000504954,;UGT3A2,3_prime_UTR_variant,,ENST00000504685,;	C
TCGA-86-7955-01A-11D-2184-08	UGT2B28	0	.	GRCh37	4	70146303	70146303	+	Missense_Mutation	SNP	T	T	A	rs765312101	.	LUAD		TCGA-86-7955-01A-11D-2184-08	TCGA-86-7955-10A-01D-2184-08	T	T	.	.	.	.	.	.	.	.	.	.	.	.	.	.	.	c.85T>A	p.Trp29Arg	p.W29R	ENST00000335568	1/6	191	30	161	136	136	0	UGT2B28,missense_variant,p.Trp29Arg,ENST00000511240,;UGT2B28,missense_variant,p.Trp29Arg,ENST00000335568,;	A
TCGA-86-8054-01A-11D-2238-08	UGT2B28	0	.	GRCh37	4	70156380	70156380	+	Silent	SNP	G	G	T	rs143921369	.	LUAD		TCGA-86-8054-01A-11D-2238-08	TCGA-86-8054-10A-01D-2238-08	G	G	.	.	.	.	.	.	.	.	.	.	.	.	.	.	.	c.1161G>T	p.%3D	p.G387G	ENST00000335568	5/6	100	65	35	108	108	0	UGT2B28,synonymous_variant,p.%3D,ENST00000335568,;UGT2B28,intron_variant,,ENST00000511240,;	T
TCGA-86-8054-01A-11D-2238-08	UGT2B4	0	.	GRCh37	4	70350935	70350935	+	Missense_Mutation	SNP	T	T	C	.	.	LUAD		TCGA-86-8054-01A-11D-2238-08	TCGA-86-8054-10A-01D-2238-08	T	T	.	.	.	.	.	.	.	.	.	.	.	.	.	.	.	c.1301A>G	p.Asn434Ser	p.N434S	ENST00000305107	5/6	123	77	45	169	169	0	UGT2B4,missense_variant,p.Asn434Ser,ENST00000305107,;UGT2B4,missense_variant,p.Asn298Ser,ENST00000381096,;UGT2B4,intron_variant,,ENST00000512583,;UGT2B4,non_coding_transcript_exon_variant,,ENST00000502655,;UGT2B4,intron_variant,,ENST00000506580,;UGT2B4,downstream_gene_variant,,ENST00000503836,;	C
TCGA-86-8056-01A-11D-2238-08	UGT2A3	0	.	GRCh37	4	69811083	69811083	+	Missense_Mutation	SNP	G	G	T	novel	.	LUAD		TCGA-86-8056-01A-11D-2238-08	TCGA-86-8056-10A-01D-2238-08	G	G	.	.	.	.	.	.	.	.	.	.	.	.	.	.	.	c.805C>A	p.Gln269Lys	p.Q269K	ENST00000251566	2/6	103	76	26	41	41	0	UGT2A3,missense_variant,p.Gln269Lys,ENST00000251566,;UGT2A3,5_prime_UTR_variant,,ENST00000420231,;UGT2A3,missense_variant,p.Gln135Lys,ENST00000503012,;	T
TCGA-86-8073-01A-11D-2238-08	UGT1A4	0	.	GRCh37	2	234628319	234628319	+	Nonsense_Mutation	SNP	A	A	T	rs770674662	.	LUAD		TCGA-86-8073-01A-11D-2238-08	TCGA-86-8073-10A-01D-2238-08	A	A	.	.	.	.	.	.	.	.	.	.	.	.	.	.	.	c.853A>T	p.Lys285Ter	p.K285*	ENST00000373409	1/5	223	193	30	264	264	0	UGT1A4,stop_gained,p.Lys285Ter,ENST00000373409,;UGT1A10,intron_variant,,ENST00000373445,;UGT1A6,intron_variant,,ENST00000305139,;UGT1A6,intron_variant,,ENST00000373424,;UGT1A8,intron_variant,,ENST00000608381,;UGT1A7,intron_variant,,ENST00000373426,;UGT1A8,intron_variant,,ENST00000609637,;UGT1A5,intron_variant,,ENST00000373414,;UGT1A6,intron_variant,,ENST00000406651,;UGT1A10,intron_variant,,ENST00…	T
TCGA-86-8073-01A-11D-2238-08	UGT1A4	0	.	GRCh37	2	234680959	234680959	+	Silent	SNP	G	G	A	novel	.	LUAD		TCGA-86-8073-01A-11D-2238-08	TCGA-86-8073-10A-01D-2238-08	G	G	.	.	.	.	.	.	.	.	.	.	.	.	.	.	.	c.1359G>A	p.%3D	p.V453V	ENST00000373409	5/5	60	50	9	74	74	0	UGT1A4,synonymous_variant,p.%3D,ENST00000373409,;UGT1A6,synonymous_variant,p.%3D,ENST00000305139,;UGT1A3,synonymous_variant,p.%3D,ENST00000482026,;UGT1A6,synonymous_variant,p.%3D,ENST00000373424,;UGT1A8,synonymous_variant,p.%3D,ENST00000608383,;UGT1A8,synonymous_variant,p.%3D,ENST00000608381,;UGT1A7,synonymous_variant,p.%3D,ENST00000373426,;UGT1A8,synonymous_variant,p.%3D,ENST00000609637,;UGT1A8,…	A
TCGA-86-8073-01A-11D-2238-08	UGT1A7	0	.	GRCh37	2	234590873	234590873	+	Missense_Mutation	SNP	G	G	T	novel	.	LUAD		TCGA-86-8073-01A-11D-2238-08	TCGA-86-8073-10A-01D-2238-08	G	G	.	.	.	.	.	.	.	.	.	.	.	.	.	.	.	c.290G>T	p.Arg97Leu	p.R97L	ENST00000373426	1/5	193	161	31	217	217	0	UGT1A7,missense_variant,p.Arg97Leu,ENST00000373426,;UGT1A10,intron_variant,,ENST00000373445,;UGT1A10,intron_variant,,ENST00000344644,;UGT1A8,intron_variant,,ENST00000373450,;UGT1A8,intron_variant,,ENST00000609637,;UGT1A9,intron_variant,,ENST00000354728,;UGT1A7,upstream_gene_variant,,ENST00000485022,;	T
TCGA-86-8073-01A-11D-2238-08	UGT2A1	0	.	GRCh37	4	70455349	70455349	+	Missense_Mutation	SNP	C	C	G	novel	.	LUAD		TCGA-86-8073-01A-11D-2238-08	TCGA-86-8073-10A-01D-2238-08	C	C	.	.	.	.	.	.	.	.	.	.	.	.	.	.	.	c.1823G>C	p.Arg608Thr	p.R608T	ENST00000514019	7/7	181	173	8	138	138	0	UGT2A1,missense_variant,p.Arg442Thr,ENST00000286604,;UGT2A1,missense_variant,p.Arg608Thr,ENST00000514019,;UGT2A1,missense_variant,p.Arg442Thr,ENST00000503640,;UGT2A2,missense_variant,p.Arg408Thr,ENST00000604021,;UGT2A2,missense_variant,p.Arg451Thr,ENST00000457664,;UGT2A1,missense_variant,p.Arg398Thr,ENST00000512704,;UGT2A2,missense_variant,p.Arg452Thr,ENST00000604629,;UGT2A1,non_coding_transcript…	G
TCGA-86-8073-01A-11D-2238-08	UGT2A3	0	.	GRCh37	4	69816779	69816779	+	Missense_Mutation	SNP	A	A	G	novel	.	LUAD		TCGA-86-8073-01A-11D-2238-08	TCGA-86-8073-10A-01D-2238-08	A	A	.	.	.	.	.	.	.	.	.	.	.	.	.	.	.	c.700T>C	p.Tyr234His	p.Y234H	ENST00000251566	1/6	50	37	13	16	16	0	UGT2A3,missense_variant,p.Tyr234His,ENST00000251566,;UGT2A3,5_prime_UTR_variant,,ENST00000420231,;UGT2A3,missense_variant,p.Tyr100His,ENST00000503012,;	G
TCGA-86-8073-01A-11D-2238-08	UGT2B7	0	.	GRCh37	4	69973832	69973832	+	Missense_Mutation	SNP	A	A	T	rs151128457	.	LUAD		TCGA-86-8073-01A-11D-2238-08	TCGA-86-8073-10A-01D-2238-08	A	A	.	.	.	.	.	.	.	.	.	.	.	.	.	.	.	c.1102A>T	p.Thr368Ser	p.T368S	ENST00000305231	5/6	186	140	46	113	113	0	UGT2B7,missense_variant,p.Thr368Ser,ENST00000305231,;UGT2B7,missense_variant,p.Thr119Ser,ENST00000502942,;UGT2B7,intron_variant,,ENST00000508661,;UGT2B7,intron_variant,,ENST00000509763,;	T
TCGA-86-8073-01A-11D-2238-08	UGT3A2	0	.	GRCh37	5	36038112	36038112	+	Missense_Mutation	SNP	G	G	T	.	.	LUAD		TCGA-86-8073-01A-11D-2238-08	TCGA-86-8073-10A-01D-2238-08	G	G	.	.	.	.	.	.	.	.	.	.	.	.	.	.	.	c.1082C>A	p.Pro361Gln	p.P361Q	ENST00000282507	6/7	97	55	42	53	53	0	UGT3A2,missense_variant,p.Pro327Gln,ENST00000513300,;UGT3A2,missense_variant,p.Pro59Gln,ENST00000545528,;UGT3A2,missense_variant,p.Pro361Gln,ENST00000282507,;UGT3A2,downstream_gene_variant,,ENST00000504954,;UGT3A2,3_prime_UTR_variant,,ENST00000504685,;	T
TCGA-86-8073-01A-11D-2238-08	UGT3A2	0	.	GRCh37	5	36038113	36038113	+	Missense_Mutation	SNP	G	G	T	rs761947299	.	LUAD		TCGA-86-8073-01A-11D-2238-08	TCGA-86-8073-10A-01D-2238-08	G	G	.	.	.	.	.	.	.	.	.	.	.	.	.	.	.	c.1081C>A	p.Pro361Thr	p.P361T	ENST00000282507	6/7	96	55	40	53	53	0	UGT3A2,missense_variant,p.Pro327Thr,ENST00000513300,;UGT3A2,missense_variant,p.Pro59Thr,ENST00000545528,;UGT3A2,missense_variant,p.Pro361Thr,ENST00000282507,;UGT3A2,downstream_gene_variant,,ENST00000504954,;UGT3A2,3_prime_UTR_variant,,ENST00000504685,;	T
TCGA-86-8279-01A-11D-2284-08	UGT2B11	0	.	GRCh37	4	70080208	70080208	+	Missense_Mutation	SNP	G	G	T	rs773374868	.	LUAD		TCGA-86-8279-01A-11D-2284-08	TCGA-86-8279-10A-01D-2284-08	G	G	.	.	.	.	.	.	.	.	.	.	.	.	.	.	.	c.233C>A	p.Pro78His	p.P78H	ENST00000446444	1/6	112	36	76	129	129	0	UGT2B11,missense_variant,p.Pro78His,ENST00000446444,;RP11-704M14.1,non_coding_transcript_exon_variant,,ENST00000505646,;RP11-704M14.1,downstream_gene_variant,,ENST00000504301,;RP11-704M14.2,downstream_gene_variant,,ENST00000514003,;	T
TCGA-86-8279-01A-11D-2284-08	UGT2B11	0	.	GRCh37	4	70080209	70080209	+	Missense_Mutation	SNP	G	G	T	.	.	LUAD		TCGA-86-8279-01A-11D-2284-08	TCGA-86-8279-10A-01D-2284-08	G	G	.	.	.	.	.	.	.	.	.	.	.	.	.	.	.	c.232C>A	p.Pro78Thr	p.P78T	ENST00000446444	1/6	112	37	75	130	130	0	UGT2B11,missense_variant,p.Pro78Thr,ENST00000446444,;RP11-704M14.1,non_coding_transcript_exon_variant,,ENST00000505646,;RP11-704M14.1,downstream_gene_variant,,ENST00000504301,;RP11-704M14.2,downstream_gene_variant,,ENST00000514003,;	T
TCGA-86-8358-01A-11D-2323-08	UGT1A8	0	.	GRCh37	2	234527121	234527121	+	Missense_Mutation	SNP	C	C	A	novel	.	LUAD		TCGA-86-8358-01A-11D-2323-08	TCGA-86-8358-10A-01D-2323-08	C	C	.	.	.	.	.	.	.	.	.	.	.	.	.	.	.	c.768C>A	p.Asp256Glu	p.D256E	ENST00000373450	1/5	467	305	161	533	533	0	UGT1A8,missense_variant,p.Asp256Glu,ENST00000373450,;	A
TCGA-86-8358-01A-11D-2323-08	UGT8	0	.	GRCh37	4	115577984	115577984	+	Intron	SNP	G	G	T	novel	.	LUAD		TCGA-86-8358-01A-11D-2323-08	TCGA-86-8358-10A-01D-2323-08	G	G	.	.	.	.	.	.	.	.	.	.	.	.	.	.	.	c.823-7167G>T	.	.	ENST00000310836	.	16	11	5	9	9	0	UGT8,intron_variant,,ENST00000310836,;UGT8,intron_variant,,ENST00000394511,;MIR577,non_coding_transcript_exon_variant,,ENST00000385196,;	T
TCGA-86-8359-01A-11D-2323-08	UGT1A3	0	.	GRCh37	2	234638492	234638492	+	Missense_Mutation	SNP	G	G	C	novel	.	LUAD		TCGA-86-8359-01A-11D-2323-08	TCGA-86-8359-10A-01D-2323-08	G	G	.	.	.	.	.	.	.	.	.	.	.	.	.	.	.	c.720G>C	p.Gln240His	p.Q240H	ENST00000482026	1/5	319	187	131	308	308	0	UGT1A3,missense_variant,p.Gln240His,ENST00000482026,;UGT1A8,missense_variant,p.Gln240His,ENST00000609767,;UGT1A10,intron_variant,,ENST00000373445,;UGT1A4,intron_variant,,ENST00000373409,;UGT1A6,intron_variant,,ENST00000305139,;UGT1A6,intron_variant,,ENST00000373424,;UGT1A8,intron_variant,,ENST00000608381,;UGT1A7,intron_variant,,ENST00000373426,;UGT1A8,intron_variant,,ENST00000609637,;UGT1A5,intro…	C
TCGA-86-8673-01A-11D-2393-08	UGT2A3	0	.	GRCh37	4	69796394	69796394	+	Missense_Mutation	SNP	G	G	T	.	.	LUAD		TCGA-86-8673-01A-11D-2393-08	TCGA-86-8673-10A-01D-2393-08	G	G	.	.	.	.	.	.	.	.	.	.	.	.	.	.	.	c.1174C>A	p.Pro392Thr	p.P392T	ENST00000251566	5/6	112	95	17	189	189	0	UGT2A3,missense_variant,p.Pro392Thr,ENST00000251566,;UGT2A3,missense_variant,p.Pro103Thr,ENST00000420231,;UGT2A3,3_prime_UTR_variant,,ENST00000503012,;	T
TCGA-86-8673-01A-11D-2393-08	UGT2B11	0	.	GRCh37	4	70071280	70071280	+	Silent	SNP	C	C	A	novel	.	LUAD		TCGA-86-8673-01A-11D-2393-08	TCGA-86-8673-10A-01D-2393-08	C	C	.	.	.	.	.	.	.	.	.	.	.	.	.	.	.	c.1008G>T	p.%3D	p.L336L	ENST00000446444	4/6	144	102	42	166	166	0	UGT2B11,synonymous_variant,p.%3D,ENST00000446444,;RP11-704M14.1,intron_variant,,ENST00000504301,;RP11-704M14.1,intron_variant,,ENST00000505646,;UGT2B11,non_coding_transcript_exon_variant,,ENST00000513315,;	A
TCGA-86-A456-01A-11D-A24D-08	UGT3A2	0	.	GRCh37	5	36066861	36066861	+	Missense_Mutation	SNP	C	C	G	novel	.	LUAD		TCGA-86-A456-01A-11D-A24D-08	TCGA-86-A456-10A-01D-A24F-08	C	C	.	.	.	.	.	.	.	.	.	.	.	.	.	.	.	c.31G>C	p.Gly11Arg	p.G11R	ENST00000282507	1/7	155	116	39	144	144	0	UGT3A2,missense_variant,p.Gly11Arg,ENST00000513300,;UGT3A2,missense_variant,p.Gly11Arg,ENST00000515131,;UGT3A2,missense_variant,p.Gly11Arg,ENST00000282507,;UGT3A2,5_prime_UTR_variant,,ENST00000545528,;UGT3A2,intron_variant,,ENST00000504954,;UGT3A2,missense_variant,p.Gly11Arg,ENST00000504685,;	G
TCGA-86-A4JF-01A-11D-A24P-08	UGT2B11	0	.	GRCh37	4	70078378	70078378	+	Silent	SNP	G	G	T	rs111436323	.	LUAD		TCGA-86-A4JF-01A-11D-A24P-08	TCGA-86-A4JF-10A-01D-A24P-08	G	G	.	.	.	.	.	.	.	.	.	.	.	.	.	.	.	c.783C>A	p.%3D	p.S261S	ENST00000446444	2/6	145	114	30	202	202	0	UGT2B11,synonymous_variant,p.%3D,ENST00000446444,;RP11-704M14.1,intron_variant,,ENST00000504301,;RP11-704M14.1,intron_variant,,ENST00000505646,;RP11-704M14.2,downstream_gene_variant,,ENST00000514003,;	T
TCGA-86-A4JF-01A-11D-A24P-08	UGT2B11	0	.	GRCh37	4	70078379	70078379	+	Missense_Mutation	SNP	G	G	T	rs776739581	.	LUAD		TCGA-86-A4JF-01A-11D-A24P-08	TCGA-86-A4JF-10A-01D-A24P-08	G	G	.	.	.	.	.	.	.	.	.	.	.	.	.	.	.	c.782C>A	p.Ser261Tyr	p.S261Y	ENST00000446444	2/6	146	117	29	205	205	0	UGT2B11,missense_variant,p.Ser261Tyr,ENST00000446444,;RP11-704M14.1,intron_variant,,ENST00000504301,;RP11-704M14.1,intron_variant,,ENST00000505646,;RP11-704M14.2,downstream_gene_variant,,ENST00000514003,;	T
TCGA-86-A4JF-01A-11D-A24P-08	UGT3A1	0	.	GRCh37	5	35965906	35965906	+	Missense_Mutation	SNP	A	A	G	novel	.	LUAD		TCGA-86-A4JF-01A-11D-A24P-08	TCGA-86-A4JF-10A-01D-A24P-08	A	A	.	.	.	.	.	.	.	.	.	.	.	.	.	.	.	c.425T>C	p.Val142Ala	p.V142A	ENST00000274278	4/7	87	68	18	80	80	0	UGT3A1,missense_variant,p.Val142Ala,ENST00000274278,;UGT3A1,missense_variant,p.Val108Ala,ENST00000507113,;UGT3A1,missense_variant,p.Val88Ala,ENST00000333811,;UGT3A1,missense_variant,p.Val142Ala,ENST00000503189,;UGT3A1,intron_variant,,ENST00000513233,;UGT3A1,3_prime_UTR_variant,,ENST00000515801,;	G
TCGA-86-A4JF-01A-11D-A24P-08	UGT3A2	0	.	GRCh37	5	36039627	36039627	+	Missense_Mutation	SNP	C	C	A	novel	.	LUAD		TCGA-86-A4JF-01A-11D-A24P-08	TCGA-86-A4JF-10A-01D-A24P-08	C	C	.	.	.	.	.	.	.	.	.	.	.	.	.	.	.	c.1027G>T	p.Ala343Ser	p.A343S	ENST00000282507	5/7	114	90	24	130	130	0	UGT3A2,missense_variant,p.Ala309Ser,ENST00000513300,;UGT3A2,missense_variant,p.Ala41Ser,ENST00000545528,;UGT3A2,missense_variant,p.Ala343Ser,ENST00000282507,;UGT3A2,downstream_gene_variant,,ENST00000504954,;UGT3A2,3_prime_UTR_variant,,ENST00000504685,;	A
TCGA-91-6828-01A-11D-1855-08	UGT1A7	0	.	GRCh37	2	234590853	234590853	+	Silent	SNP	C	C	T	.	.	LUAD		TCGA-91-6828-01A-11D-1855-08	TCGA-91-6828-10A-01D-1855-08	C	C	.	.	.	.	.	.	.	.	.	.	.	.	.	.	.	c.270C>T	p.%3D	p.F90F	ENST00000373426	1/5	205	144	60	206	204	1	UGT1A7,synonymous_variant,p.%3D,ENST00000373426,;UGT1A10,intron_variant,,ENST00000373445,;UGT1A10,intron_variant,,ENST00000344644,;UGT1A8,intron_variant,,ENST00000373450,;UGT1A8,intron_variant,,ENST00000609637,;UGT1A9,intron_variant,,ENST00000354728,;UGT1A7,upstream_gene_variant,,ENST00000485022,;	T
TCGA-91-6835-01A-11D-1855-08	UGT2B17	0	.	GRCh37	4	69431416	69431416	+	Missense_Mutation	SNP	C	C	A	novel	.	LUAD		TCGA-91-6835-01A-11D-1855-08	TCGA-91-6835-11A-01D-1855-08	C	C	.	.	.	.	.	.	.	.	.	.	.	.	.	.	.	c.747G>T	p.Glu249Asp	p.E249D	ENST00000317746	2/6	170	157	12	188	188	0	UGT2B17,missense_variant,p.Glu249Asp,ENST00000317746,;	A
TCGA-91-6835-01A-11D-1855-08	UGT2B17	0	.	GRCh37	4	69431418	69431418	+	Missense_Mutation	SNP	C	C	T	novel	.	LUAD		TCGA-91-6835-01A-11D-1855-08	TCGA-91-6835-11A-01D-1855-08	C	C	.	.	.	.	.	.	.	.	.	.	.	.	.	.	.	c.745G>A	p.Glu249Lys	p.E249K	ENST00000317746	2/6	170	157	12	188	188	0	UGT2B17,missense_variant,p.Glu249Lys,ENST00000317746,;	T
TCGA-91-7771-01A-11D-2167-08	UGT3A1	0	.	GRCh37	5	35954457	35954457	+	Frame_Shift_Del	DEL	G	G	-	novel	.	LUAD		TCGA-91-7771-01A-11D-2167-08	TCGA-91-7771-10A-01D-2167-08	G	G	.	.	.	.	.	.	.	.	.	.	.	.	.	.	.	c.1419delC	p.Tyr474MetfsTer47	p.Y474Mfs*47	ENST00000274278	7/7	68	55	13	48	48	0	UGT3A1,frameshift_variant,p.Tyr474MetfsTer47,ENST00000274278,;UGT3A1,downstream_gene_variant,,ENST00000507113,;UGT3A1,downstream_gene_variant,,ENST00000503189,;UGT3A1,downstream_gene_variant,,ENST00000513233,;UGT3A1,3_prime_UTR_variant,,ENST00000515801,;	-
TCGA-91-A4BC-01A-11D-A24D-08	UGT2B11	0	.	GRCh37	4	70080215	70080215	+	Missense_Mutation	SNP	C	C	A	rs761060218	.	LUAD		TCGA-91-A4BC-01A-11D-A24D-08	TCGA-91-A4BC-10A-01D-A24F-08	C	C	.	.	.	.	.	.	.	.	.	.	.	.	.	.	.	c.226G>T	p.Val76Phe	p.V76F	ENST00000446444	1/6	108	94	14	94	94	0	UGT2B11,missense_variant,p.Val76Phe,ENST00000446444,;RP11-704M14.1,non_coding_transcript_exon_variant,,ENST00000505646,;RP11-704M14.1,downstream_gene_variant,,ENST00000504301,;RP11-704M14.2,downstream_gene_variant,,ENST00000514003,;	A
TCGA-93-7348-01A-21D-2036-08	UGT1A8	0	.	GRCh37	2	234669637	234669637	+	Intron	SNP	C	C	T	.	.	LUAD		TCGA-93-7348-01A-21D-2036-08	TCGA-93-7348-10A-01D-2036-08	C	C	.	.	.	.	.	.	.	.	.	.	.	.	.	.	.	c.868-6043C>T	.	.	ENST00000609767	.	170	161	9	143	143	0	UGT1A8,missense_variant,p.Ser235Leu,ENST00000608383,;UGT1A8,missense_variant,p.Ser235Leu,ENST00000360418,;UGT1A1,missense_variant,p.Ser235Leu,ENST00000305208,;UGT1A10,intron_variant,,ENST00000373445,;UGT1A4,intron_variant,,ENST00000373409,;UGT1A6,intron_variant,,ENST00000305139,;UGT1A3,intron_variant,,ENST00000482026,;UGT1A6,intron_variant,,ENST00000373424,;UGT1A8,intron_variant,,ENST00000608381,…	T
TCGA-93-8067-01A-11D-2284-08	UGT8	0	.	GRCh37	4	115544150	115544150	+	Missense_Mutation	SNP	C	C	A	novel	.	LUAD		TCGA-93-8067-01A-11D-2284-08	TCGA-93-8067-10A-01D-2284-08	C	C	.	.	.	.	.	.	.	.	.	.	.	.	.	.	.	c.114C>A	p.Phe38Leu	p.F38L	ENST00000310836	2/6	76	61	15	50	50	0	UGT8,missense_variant,p.Phe38Leu,ENST00000507710,;UGT8,missense_variant,p.Phe38Leu,ENST00000310836,;UGT8,missense_variant,p.Phe38Leu,ENST00000394511,;	A
TCGA-95-7039-01A-11D-1945-08	UGT2B4	0	.	GRCh37	4	70361312	70361312	+	Missense_Mutation	SNP	T	T	A	.	.	LUAD		TCGA-95-7039-01A-11D-1945-08	TCGA-95-7039-10A-01D-1946-08	T	T	.	.	.	.	.	.	.	.	.	.	.	.	.	.	.	c.268A>T	p.Ile90Phe	p.I90F	ENST00000305107	1/6	20	17	3	31	31	0	UGT2B4,missense_variant,p.Ile90Phe,ENST00000305107,;UGT2B4,missense_variant,p.Ile90Phe,ENST00000512583,;UGT2B4,intron_variant,,ENST00000381096,;UGT2B4,downstream_gene_variant,,ENST00000510114,;UGT2B4,non_coding_transcript_exon_variant,,ENST00000506580,;UGT2B4,intron_variant,,ENST00000503836,;UGT2B4,intron_variant,,ENST00000502655,;	A
TCGA-95-7039-01A-11D-1945-08	UGT3A1	0	.	GRCh37	5	35957310	35957310	+	Missense_Mutation	SNP	A	A	C	.	.	LUAD		TCGA-95-7039-01A-11D-1945-08	TCGA-95-7039-10A-01D-1946-08	A	A	.	.	.	.	.	.	.	.	.	.	.	.	.	.	.	c.1055T>G	p.Leu352Arg	p.L352R	ENST00000274278	5/7	72	68	4	38	38	0	UGT3A1,missense_variant,p.Leu352Arg,ENST00000274278,;UGT3A1,missense_variant,p.Leu318Arg,ENST00000507113,;UGT3A1,missense_variant,p.Leu352Arg,ENST00000503189,;UGT3A1,downstream_gene_variant,,ENST00000333811,;UGT3A1,non_coding_transcript_exon_variant,,ENST00000513233,;UGT3A1,3_prime_UTR_variant,,ENST00000515801,;	C
TCGA-95-7562-01A-11D-2238-08	UGT3A2	0	.	GRCh37	5	36049001	36049001	+	Missense_Mutation	SNP	G	G	T	.	.	LUAD		TCGA-95-7562-01A-11D-2238-08	TCGA-95-7562-10B-01D-2238-08	G	G	.	.	.	.	.	.	.	.	.	.	.	.	.	.	.	c.833C>A	p.Pro278Gln	p.P278Q	ENST00000282507	4/7	125	118	7	105	105	0	UGT3A2,missense_variant,p.Pro244Gln,ENST00000513300,;UGT3A2,missense_variant,p.Pro278Gln,ENST00000282507,;UGT3A2,intron_variant,,ENST00000545528,;UGT3A2,downstream_gene_variant,,ENST00000515131,;UGT3A2,intron_variant,,ENST00000504954,;UGT3A2,intron_variant,,ENST00000504685,;	T
TCGA-95-7567-01A-11D-2063-08	UGT1A10	0	.	GRCh37	2	234545503	234545503	+	Missense_Mutation	SNP	C	C	T	novel	.	LUAD		TCGA-95-7567-01A-11D-2063-08	TCGA-95-7567-10A-01D-2063-08	C	C	.	.	.	.	.	.	.	.	.	.	.	.	.	.	.	c.335C>T	p.Ser112Leu	p.S112L	ENST00000344644	1/5	128	111	17	156	156	0	UGT1A10,missense_variant,p.Ser112Leu,ENST00000373445,;UGT1A10,missense_variant,p.Ser112Leu,ENST00000344644,;UGT1A8,intron_variant,,ENST00000373450,;	T
TCGA-95-7567-01A-11D-2063-08	UGT2B28	0	.	GRCh37	4	70152507	70152507	+	Missense_Mutation	SNP	G	G	A	novel	.	LUAD		TCGA-95-7567-01A-11D-2063-08	TCGA-95-7567-10A-01D-2063-08	G	G	.	.	.	.	.	.	.	.	.	.	.	.	.	.	.	c.908G>A	p.Gly303Asp	p.G303D	ENST00000335568	3/6	180	148	31	230	230	0	UGT2B28,missense_variant,p.Gly303Asp,ENST00000511240,;UGT2B28,missense_variant,p.Gly303Asp,ENST00000335568,;	A
TCGA-95-7567-01A-11D-2063-08	UGT2B7	0	.	GRCh37	4	69978228	69978228	+	Missense_Mutation	SNP	A	A	G	novel	.	LUAD		TCGA-95-7567-01A-11D-2063-08	TCGA-95-7567-10A-01D-2063-08	A	A	.	.	.	.	.	.	.	.	.	.	.	.	.	.	.	c.1364A>G	p.Lys455Arg	p.K455R	ENST00000305231	6/6	86	64	22	177	177	0	UGT2B7,missense_variant,p.Lys455Arg,ENST00000305231,;UGT2B7,3_prime_UTR_variant,,ENST00000508661,;UGT2B7,downstream_gene_variant,,ENST00000502942,;UGT2B7,non_coding_transcript_exon_variant,,ENST00000509763,;	G
TCGA-95-7567-01A-11D-2063-08	UGT2B7	0	.	GRCh37	4	69978313	69978313	+	Silent	SNP	C	C	T	novel	.	LUAD		TCGA-95-7567-01A-11D-2063-08	TCGA-95-7567-10A-01D-2063-08	C	C	.	.	.	.	.	.	.	.	.	.	.	.	.	.	.	c.1449C>T	p.%3D	p.L483L	ENST00000305231	6/6	123	92	31	200	200	0	UGT2B7,synonymous_variant,p.%3D,ENST00000305231,;UGT2B7,3_prime_UTR_variant,,ENST00000508661,;UGT2B7,downstream_gene_variant,,ENST00000502942,;UGT2B7,downstream_gene_variant,,ENST00000509763,;	T
TCGA-95-7948-01A-11D-2184-08	UGT3A2	0	.	GRCh37	5	36049273	36049273	+	Silent	SNP	G	G	A	.	.	LUAD		TCGA-95-7948-01A-11D-2184-08	TCGA-95-7948-10A-01D-2184-08	G	G	.	.	.	.	.	.	.	.	.	.	.	.	.	.	.	c.561C>T	p.%3D	p.F187F	ENST00000282507	4/7	110	84	25	108	108	0	UGT3A2,synonymous_variant,p.%3D,ENST00000513300,;UGT3A2,synonymous_variant,p.%3D,ENST00000282507,;UGT3A2,intron_variant,,ENST00000545528,;UGT3A2,downstream_gene_variant,,ENST00000515131,;UGT3A2,intron_variant,,ENST00000504954,;UGT3A2,intron_variant,,ENST00000504685,;	A
TCGA-95-8039-01A-11D-2238-08	UGT2B4	0	.	GRCh37	4	70361160	70361160	+	Silent	SNP	T	T	C	novel	.	LUAD		TCGA-95-8039-01A-11D-2238-08	TCGA-95-8039-10A-01D-2238-08	T	T	.	.	.	.	.	.	.	.	.	.	.	.	.	.	.	c.420A>G	p.%3D	p.L140L	ENST00000305107	1/6	22	17	5	24	24	0	UGT2B4,synonymous_variant,p.%3D,ENST00000305107,;UGT2B4,synonymous_variant,p.%3D,ENST00000512583,;UGT2B4,intron_variant,,ENST00000381096,;UGT2B4,downstream_gene_variant,,ENST00000510114,;UGT2B4,non_coding_transcript_exon_variant,,ENST00000506580,;UGT2B4,intron_variant,,ENST00000503836,;UGT2B4,intron_variant,,ENST00000502655,;	C
TCGA-95-A4VK-01A-11D-A25L-08	UGT1A8	0	.	GRCh37	2	234527015	234527015	+	Missense_Mutation	SNP	A	A	T	rs139633511	.	LUAD		TCGA-95-A4VK-01A-11D-A25L-08	TCGA-95-A4VK-10A-01D-A25L-08	A	A	.	.	.	.	.	.	.	.	.	.	.	.	.	.	.	c.662A>T	p.Gln221Leu	p.Q221L	ENST00000373450	1/5	579	427	151	346	346	0	UGT1A8,missense_variant,p.Gln221Leu,ENST00000373450,;	T
TCGA-95-A4VK-01A-11D-A25L-08	UGT2B4	0	.	GRCh37	4	70361450	70361450	+	Missense_Mutation	SNP	C	C	T	.	.	LUAD		TCGA-95-A4VK-01A-11D-A25L-08	TCGA-95-A4VK-10A-01D-A25L-08	C	C	.	.	.	.	.	.	.	.	.	.	.	.	.	.	.	c.130G>A	p.Asp44Asn	p.D44N	ENST00000305107	1/6	245	192	52	184	184	0	UGT2B4,missense_variant,p.Asp44Asn,ENST00000510114,;UGT2B4,missense_variant,p.Asp44Asn,ENST00000305107,;UGT2B4,missense_variant,p.Asp44Asn,ENST00000512583,;UGT2B4,intron_variant,,ENST00000381096,;UGT2B4,non_coding_transcript_exon_variant,,ENST00000506580,;UGT2B4,intron_variant,,ENST00000503836,;UGT2B4,intron_variant,,ENST00000502655,;	T
TCGA-95-A4VN-01A-11D-A25L-08	UGT2B11	0	.	GRCh37	4	70070257	70070257	+	Missense_Mutation	SNP	C	C	A	novel	.	LUAD		TCGA-95-A4VN-01A-11D-A25L-08	TCGA-95-A4VN-10A-01D-A25L-08	C	C	.	.	.	.	.	.	.	.	.	.	.	.	.	.	.	c.1201G>T	p.Asp401Tyr	p.D401Y	ENST00000446444	5/6	322	266	56	279	278	1	UGT2B11,missense_variant,p.Asp401Tyr,ENST00000446444,;RP11-704M14.1,intron_variant,,ENST00000504301,;RP11-704M14.1,intron_variant,,ENST00000505646,;UGT2B11,non_coding_transcript_exon_variant,,ENST00000513315,;	A
TCGA-95-A4VP-01A-21D-A25L-08	UGT1A10	0	.	GRCh37	2	234545287	234545287	+	Missense_Mutation	SNP	C	C	T	novel	.	LUAD		TCGA-95-A4VP-01A-21D-A25L-08	TCGA-95-A4VP-10A-01D-A25L-08	C	C	.	.	.	.	.	.	.	.	.	.	.	.	.	.	.	c.119C>T	p.Thr40Ile	p.T40I	ENST00000344644	1/5	169	160	9	120	120	0	UGT1A10,missense_variant,p.Thr40Ile,ENST00000373445,;UGT1A10,missense_variant,p.Thr40Ile,ENST00000344644,;UGT1A8,intron_variant,,ENST00000373450,;	T
TCGA-97-7554-01A-11D-2036-08	UGT1A9	0	.	GRCh37	2	234580712	234580712	+	Silent	SNP	G	G	T	rs747820037	.	LUAD		TCGA-97-7554-01A-11D-2036-08	TCGA-97-7554-10A-01D-2036-08	G	G	.	.	.	.	.	.	.	.	.	.	.	.	.	.	.	c.132G>T	p.%3D	p.V44V	ENST00000354728	1/5	84	69	14	73	73	0	UGT1A8,synonymous_variant,p.%3D,ENST00000609637,;UGT1A9,synonymous_variant,p.%3D,ENST00000354728,;UGT1A10,intron_variant,,ENST00000373445,;UGT1A10,intron_variant,,ENST00000344644,;UGT1A8,intron_variant,,ENST00000373450,;	T
TCGA-97-7554-01A-11D-2036-08	UGT8	0	.	GRCh37	4	115544302	115544302	+	Missense_Mutation	SNP	A	A	T	.	.	LUAD		TCGA-97-7554-01A-11D-2036-08	TCGA-97-7554-10A-01D-2036-08	A	A	.	.	.	.	.	.	.	.	.	.	.	.	.	.	.	c.266A>T	p.Lys89Met	p.K89M	ENST00000310836	2/6	81	61	20	83	83	0	UGT8,missense_variant,p.Lys89Met,ENST00000507710,;UGT8,missense_variant,p.Lys89Met,ENST00000310836,;UGT8,missense_variant,p.Lys89Met,ENST00000394511,;	T
TCGA-97-7937-01A-11D-2167-08	UGT2A2	0	.	GRCh37	4	70505078	70505078	+	Missense_Mutation	SNP	G	G	T	.	.	LUAD		TCGA-97-7937-01A-11D-2167-08	TCGA-97-7937-10A-01D-2167-08	G	G	.	.	.	.	.	.	.	.	.	.	.	.	.	.	.	c.281C>A	p.Ser94Tyr	p.S94Y	ENST00000457664	1/6	45	35	10	43	43	0	UGT2A2,missense_variant,p.Ser95Tyr,ENST00000604021,;UGT2A2,missense_variant,p.Ser94Tyr,ENST00000457664,;UGT2A1,missense_variant,p.Ser295Tyr,ENST00000514019,;UGT2A2,missense_variant,p.Ser95Tyr,ENST00000604629,;UGT2A1,intron_variant,,ENST00000286604,;UGT2A1,intron_variant,,ENST00000512704,;UGT2A1,intron_variant,,ENST00000503640,;	T
TCGA-97-7937-01A-11D-2167-08	UGT2B15	0	.	GRCh37	4	69533895	69533895	+	Missense_Mutation	SNP	T	T	A	.	.	LUAD		TCGA-97-7937-01A-11D-2167-08	TCGA-97-7937-10A-01D-2167-08	T	T	.	.	.	.	.	.	.	.	.	.	.	.	.	.	.	c.736A>T	p.Thr246Ser	p.T246S	ENST00000338206	2/6	74	46	28	79	79	0	UGT2B15,missense_variant,p.Thr246Ser,ENST00000338206,;	A
TCGA-97-8172-01A-11D-2284-08	UGT2A2	0	.	GRCh37	4	70504982	70504982	+	Missense_Mutation	SNP	G	G	T	novel	.	LUAD		TCGA-97-8172-01A-11D-2284-08	TCGA-97-8172-10A-01D-2284-08	G	G	.	.	.	.	.	.	.	.	.	.	.	.	.	.	.	c.377C>A	p.Thr126Asn	p.T126N	ENST00000457664	1/6	86	67	19	56	56	0	UGT2A2,missense_variant,p.Thr127Asn,ENST00000604021,;UGT2A2,missense_variant,p.Thr126Asn,ENST00000457664,;UGT2A1,missense_variant,p.Thr327Asn,ENST00000514019,;UGT2A2,missense_variant,p.Thr127Asn,ENST00000604629,;UGT2A1,intron_variant,,ENST00000286604,;UGT2A1,intron_variant,,ENST00000512704,;UGT2A1,intron_variant,,ENST00000503640,;	T
TCGA-97-8172-01A-11D-2284-08	UGT2B28	0	.	GRCh37	4	70148356	70148356	+	Missense_Mutation	SNP	C	C	G	novel	.	LUAD		TCGA-97-8172-01A-11D-2284-08	TCGA-97-8172-10A-01D-2284-08	C	C	.	.	.	.	.	.	.	.	.	.	.	.	.	.	.	c.846C>G	p.Cys282Trp	p.C282W	ENST00000335568	2/6	235	183	52	256	256	0	UGT2B28,missense_variant,p.Cys282Trp,ENST00000511240,;UGT2B28,missense_variant,p.Cys282Trp,ENST00000335568,;	G
TCGA-97-A4LX-01A-11D-A24P-08	UGT2B11	0	.	GRCh37	4	70066359	70066359	+	Missense_Mutation	SNP	C	C	A	rs773751461	.	LUAD		TCGA-97-A4LX-01A-11D-A24P-08	TCGA-97-A4LX-10A-01D-A24P-08	C	C	.	.	.	.	.	.	.	.	.	.	.	.	.	.	.	c.1389G>T	p.Trp463Cys	p.W463C	ENST00000446444	6/6	183	163	19	203	203	0	UGT2B11,missense_variant,p.Trp463Cys,ENST00000446444,;RP11-704M14.1,intron_variant,,ENST00000504301,;RP11-704M14.1,intron_variant,,ENST00000505646,;UGT2B11,downstream_gene_variant,,ENST00000513315,;	A
TCGA-99-7458-01A-11D-2036-08	UGT2B11	0	.	GRCh37	4	70080447	70080447	+	5'UTR	SNP	G	G	A	novel	.	LUAD		TCGA-99-7458-01A-11D-2036-08	TCGA-99-7458-10A-01D-2036-08	G	G	.	.	.	.	.	.	.	.	.	.	.	.	.	.	.	c.-7C>T	.	.	ENST00000446444	1/6	193	164	29	93	93	0	UGT2B11,5_prime_UTR_variant,,ENST00000446444,;RP11-704M14.1,non_coding_transcript_exon_variant,,ENST00000505646,;RP11-704M14.1,downstream_gene_variant,,ENST00000504301,;RP11-704M14.2,downstream_gene_variant,,ENST00000514003,;	A
TCGA-99-7458-01A-11D-2036-08	UGT2B4	0	.	GRCh37	4	70360873	70360873	+	Missense_Mutation	SNP	T	T	A	.	.	LUAD		TCGA-99-7458-01A-11D-2036-08	TCGA-99-7458-10A-01D-2036-08	T	T	.	.	.	.	.	.	.	.	.	.	.	.	.	.	.	c.707A>T	p.Tyr236Phe	p.Y236F	ENST00000305107	1/6	69	57	12	24	24	0	UGT2B4,missense_variant,p.Tyr236Phe,ENST00000305107,;UGT2B4,missense_variant,p.Tyr236Phe,ENST00000512583,;UGT2B4,missense_variant,p.Tyr100Phe,ENST00000381096,;UGT2B4,downstream_gene_variant,,ENST00000510114,;UGT2B4,non_coding_transcript_exon_variant,,ENST00000502655,;UGT2B4,intron_variant,,ENST00000506580,;UGT2B4,intron_variant,,ENST00000503836,;	A
TCGA-J2-8194-01A-11D-2238-08	UGT1A9	0	.	GRCh37	2	234581345	234581345	+	Silent	SNP	G	G	A	.	.	LUAD		TCGA-J2-8194-01A-11D-2238-08	TCGA-J2-8194-10A-01D-2238-08	G	G	.	.	.	.	.	.	.	.	.	.	.	.	.	.	.	c.765G>A	p.%3D	p.T255T	ENST00000354728	1/5	679	483	195	401	401	0	UGT1A8,synonymous_variant,p.%3D,ENST00000609637,;UGT1A9,synonymous_variant,p.%3D,ENST00000354728,;UGT1A10,intron_variant,,ENST00000373445,;UGT1A10,intron_variant,,ENST00000344644,;UGT1A8,intron_variant,,ENST00000373450,;	A
TCGA-J2-A4AD-01A-11D-A24D-08	UGT1A3	0	.	GRCh37	2	234638105	234638105	+	Silent	SNP	C	C	T	novel	.	LUAD		TCGA-J2-A4AD-01A-11D-A24D-08	TCGA-J2-A4AD-10A-01D-A24F-08	C	C	.	.	.	.	.	.	.	.	.	.	.	.	.	.	.	c.333C>T	p.%3D	p.F111F	ENST00000482026	1/5	187	139	48	164	164	0	UGT1A3,synonymous_variant,p.%3D,ENST00000482026,;UGT1A8,synonymous_variant,p.%3D,ENST00000609767,;UGT1A10,intron_variant,,ENST00000373445,;UGT1A4,intron_variant,,ENST00000373409,;UGT1A6,intron_variant,,ENST00000305139,;UGT1A6,intron_variant,,ENST00000373424,;UGT1A8,intron_variant,,ENST00000608381,;UGT1A7,intron_variant,,ENST00000373426,;UGT1A8,intron_variant,,ENST00000609637,;UGT1A5,intron_varian…	T
TCGA-L4-A4E5-01A-11D-A24P-08	UGT2B11	0	.	GRCh37	4	70080013	70080013	+	Nonsense_Mutation	SNP	G	G	T	novel	.	LUAD		TCGA-L4-A4E5-01A-11D-A24P-08	TCGA-L4-A4E5-10A-01D-A24P-08	G	G	.	.	.	.	.	.	.	.	.	.	.	.	.	.	.	c.428C>A	p.Ser143Ter	p.S143*	ENST00000446444	1/6	94	43	50	127	127	0	UGT2B11,stop_gained,p.Ser143Ter,ENST00000446444,;RP11-704M14.1,intron_variant,,ENST00000504301,;RP11-704M14.1,intron_variant,,ENST00000505646,;RP11-704M14.2,downstream_gene_variant,,ENST00000514003,;	T
TCGA-L9-A443-01A-12D-A24D-08	UGT2A2	0	.	GRCh37	4	70504927	70504927	+	Silent	SNP	C	C	T	novel	.	LUAD		TCGA-L9-A443-01A-12D-A24D-08	TCGA-L9-A443-10A-01D-A24F-08	C	C	.	.	.	.	.	.	.	.	.	.	.	.	.	.	.	c.432G>A	p.%3D	p.L144L	ENST00000457664	1/6	44	33	11	49	49	0	UGT2A2,synonymous_variant,p.%3D,ENST00000604021,;UGT2A2,synonymous_variant,p.%3D,ENST00000457664,;UGT2A1,synonymous_variant,p.%3D,ENST00000514019,;UGT2A2,synonymous_variant,p.%3D,ENST00000604629,;UGT2A1,intron_variant,,ENST00000286604,;UGT2A1,intron_variant,,ENST00000512704,;UGT2A1,intron_variant,,ENST00000503640,;	T
TCGA-L9-A443-01A-12D-A24D-08	UGT2B15	0	.	GRCh37	4	69512854	69512854	+	Missense_Mutation	SNP	C	C	A	novel	.	LUAD		TCGA-L9-A443-01A-12D-A24D-08	TCGA-L9-A443-10A-01D-A24F-08	C	C	.	.	.	.	.	.	.	.	.	.	.	.	.	.	.	c.1561G>T	p.Ala521Ser	p.A521S	ENST00000338206	6/6	103	73	30	162	162	0	UGT2B15,missense_variant,p.Ala521Ser,ENST00000338206,;	A
TCGA-L9-A443-01A-12D-A24D-08	UGT2B4	0	.	GRCh37	4	70355157	70355157	+	Missense_Mutation	SNP	C	C	A	rs748044015	.	LUAD		TCGA-L9-A443-01A-12D-A24D-08	TCGA-L9-A443-10A-01D-A24F-08	C	C	.	.	.	.	.	.	.	.	.	.	.	.	.	.	.	c.1002G>T	p.Lys334Asn	p.K334N	ENST00000305107	3/6	115	95	19	111	111	0	UGT2B4,missense_variant,p.Lys334Asn,ENST00000305107,;UGT2B4,missense_variant,p.Lys334Asn,ENST00000512583,;UGT2B4,missense_variant,p.Lys198Asn,ENST00000381096,;UGT2B4,splice_region_variant,,ENST00000506580,;UGT2B4,splice_region_variant,,ENST00000502655,;UGT2B4,downstream_gene_variant,,ENST00000503836,;	A
TCGA-L9-A444-01A-21D-A24D-08	UGT1A8	0	.	GRCh37	2	234669220	234669220	+	Intron	SNP	G	G	C	novel	.	LUAD		TCGA-L9-A444-01A-21D-A24D-08	TCGA-L9-A444-10A-01D-A24F-08	G	G	.	.	.	.	.	.	.	.	.	.	.	.	.	.	.	c.868-6460G>C	.	.	ENST00000609767	.	103	71	32	208	208	0	UGT1A8,missense_variant,p.Gly96Ala,ENST00000608383,;UGT1A8,missense_variant,p.Gly96Ala,ENST00000360418,;UGT1A1,missense_variant,p.Gly96Ala,ENST00000305208,;UGT1A10,intron_variant,,ENST00000373445,;UGT1A4,intron_variant,,ENST00000373409,;UGT1A6,intron_variant,,ENST00000305139,;UGT1A3,intron_variant,,ENST00000482026,;UGT1A6,intron_variant,,ENST00000373424,;UGT1A8,intron_variant,,ENST00000608381,;UG…	C
TCGA-L9-A444-01A-21D-A24D-08	UGT3A1	0	.	GRCh37	5	35965989	35965989	+	Missense_Mutation	SNP	C	C	A	novel	.	LUAD		TCGA-L9-A444-01A-21D-A24D-08	TCGA-L9-A444-10A-01D-A24F-08	C	C	.	.	.	.	.	.	.	.	.	.	.	.	.	.	.	c.342G>T	p.Met114Ile	p.M114I	ENST00000274278	4/7	27	13	13	37	37	0	UGT3A1,missense_variant,p.Met114Ile,ENST00000274278,;UGT3A1,missense_variant,p.Met80Ile,ENST00000507113,;UGT3A1,missense_variant,p.Met60Ile,ENST00000333811,;UGT3A1,missense_variant,p.Met114Ile,ENST00000503189,;UGT3A1,intron_variant,,ENST00000513233,;UGT3A1,3_prime_UTR_variant,,ENST00000515801,;	A
TCGA-L9-A5IP-01A-21D-A397-08	UGT2B10	0	.	GRCh37	4	69693267	69693267	+	Splice_Site	SNP	G	G	A	rs201190671	.	LUAD		TCGA-L9-A5IP-01A-21D-A397-08	TCGA-L9-A5IP-10A-01D-A39A-08	G	G	.	.	.	.	.	.	.	.	.	.	.	.	.	.	.	c.1307+1G>A	.	p.X436_splice	ENST00000265403	.	98	50	48	81	81	0	UGT2B10,splice_donor_variant,,ENST00000265403,;UGT2B10,splice_donor_variant,,ENST00000458688,;	A
TCGA-L9-A743-01A-43D-A397-08	UGT3A1	0	.	GRCh37	5	35955686	35955686	+	Intron	SNP	A	A	T	novel	.	LUAD		TCGA-L9-A743-01A-43D-A397-08	TCGA-L9-A743-10A-01D-A39A-08	A	A	.	.	.	.	.	.	.	.	.	.	.	.	.	.	.	c.1295+61T>A	.	.	ENST00000274278	.	18	14	4	21	21	0	UGT3A1,3_prime_UTR_variant,,ENST00000507113,;UGT3A1,3_prime_UTR_variant,,ENST00000503189,;UGT3A1,intron_variant,,ENST00000274278,;UGT3A1,downstream_gene_variant,,ENST00000513233,;UGT3A1,3_prime_UTR_variant,,ENST00000515801,;	T
TCGA-L9-A7SV-01A-11D-A397-08	UGT1A6	0	.	GRCh37	2	234602232	234602232	+	Missense_Mutation	SNP	G	G	C	novel	.	LUAD		TCGA-L9-A7SV-01A-11D-A397-08	TCGA-L9-A7SV-10A-01D-A39A-08	G	G	.	.	.	.	.	.	.	.	.	.	.	.	.	.	.	c.582G>C	p.Arg194Ser	p.R194S	ENST00000305139	1/5	183	129	54	111	111	0	UGT1A6,missense_variant,p.Arg194Ser,ENST00000305139,;UGT1A10,intron_variant,,ENST00000373445,;UGT1A6,intron_variant,,ENST00000373424,;UGT1A7,intron_variant,,ENST00000373426,;UGT1A8,intron_variant,,ENST00000609637,;UGT1A10,intron_variant,,ENST00000344644,;UGT1A8,intron_variant,,ENST00000373450,;UGT1A9,intron_variant,,ENST00000354728,;UGT1A6,downstream_gene_variant,,ENST00000441351,;UGT1A7,downstre…	C
TCGA-L9-A7SV-01A-11D-A397-08	UGT1A7	0	.	GRCh37	2	234590890	234590890	+	Silent	SNP	C	C	A	novel	.	LUAD		TCGA-L9-A7SV-01A-11D-A397-08	TCGA-L9-A7SV-10A-01D-A39A-08	C	C	.	.	.	.	.	.	.	.	.	.	.	.	.	.	.	c.307C>A	p.%3D	p.R103R	ENST00000373426	1/5	143	105	37	101	101	0	UGT1A7,synonymous_variant,p.%3D,ENST00000373426,;UGT1A10,intron_variant,,ENST00000373445,;UGT1A10,intron_variant,,ENST00000344644,;UGT1A8,intron_variant,,ENST00000373450,;UGT1A8,intron_variant,,ENST00000609637,;UGT1A9,intron_variant,,ENST00000354728,;UGT1A7,upstream_gene_variant,,ENST00000485022,;	A
TCGA-L9-A7SV-01A-11D-A397-08	UGT1A8	0	.	GRCh37	2	234668951	234668951	+	Intron	SNP	G	G	A	rs745957787	.	LUAD		TCGA-L9-A7SV-01A-11D-A397-08	TCGA-L9-A7SV-10A-01D-A39A-08	G	G	.	.	.	.	.	.	.	.	.	.	.	.	.	.	.	c.868-6729G>A	.	.	ENST00000609767	.	36	26	10	25	25	0	UGT1A8,synonymous_variant,p.%3D,ENST00000608383,;UGT1A8,synonymous_variant,p.%3D,ENST00000360418,;UGT1A1,synonymous_variant,p.%3D,ENST00000305208,;UGT1A10,intron_variant,,ENST00000373445,;UGT1A4,intron_variant,,ENST00000373409,;UGT1A6,intron_variant,,ENST00000305139,;UGT1A3,intron_variant,,ENST00000482026,;UGT1A6,intron_variant,,ENST00000373424,;UGT1A8,intron_variant,,ENST00000608381,;UGT1A7,intr…	A
TCGA-L9-A7SV-01A-11D-A397-08	UGT2A1	0	.	GRCh37	4	70513387	70513387	+	5'UTR	SNP	G	G	T	novel	.	LUAD		TCGA-L9-A7SV-01A-11D-A397-08	TCGA-L9-A7SV-10A-01D-A39A-08	G	G	.	.	.	.	.	.	.	.	.	.	.	.	.	.	.	c.-25C>A	.	.	ENST00000514019	2/7	19	9	10	22	22	0	UGT2A1,5_prime_UTR_variant,,ENST00000505512,;UGT2A1,5_prime_UTR_variant,,ENST00000286604,;UGT2A1,5_prime_UTR_variant,,ENST00000514019,;UGT2A1,5_prime_UTR_variant,,ENST00000512704,;UGT2A1,5_prime_UTR_variant,,ENST00000503640,;	T
TCGA-L9-A7SV-01A-11D-A397-08	UGT2A3	0	.	GRCh37	4	69816863	69816863	+	Missense_Mutation	SNP	G	G	T	novel	.	LUAD		TCGA-L9-A7SV-01A-11D-A397-08	TCGA-L9-A7SV-10A-01D-A39A-08	G	G	.	.	.	.	.	.	.	.	.	.	.	.	.	.	.	c.616C>A	p.Leu206Met	p.L206M	ENST00000251566	1/6	30	19	11	26	26	0	UGT2A3,missense_variant,p.Leu206Met,ENST00000251566,;UGT2A3,5_prime_UTR_variant,,ENST00000420231,;UGT2A3,missense_variant,p.Leu72Met,ENST00000503012,;	T
TCGA-L9-A7SV-01A-11D-A397-08	UGT2B11	0	.	GRCh37	4	70066304	70066304	+	Missense_Mutation	SNP	C	C	A	novel	.	LUAD		TCGA-L9-A7SV-01A-11D-A397-08	TCGA-L9-A7SV-10A-01D-A39A-08	C	C	.	.	.	.	.	.	.	.	.	.	.	.	.	.	.	c.1444G>T	p.Asp482Tyr	p.D482Y	ENST00000446444	6/6	134	84	50	140	140	0	UGT2B11,missense_variant,p.Asp482Tyr,ENST00000446444,;RP11-704M14.1,splice_region_variant,,ENST00000504301,;RP11-704M14.1,splice_region_variant,,ENST00000505646,;UGT2B11,downstream_gene_variant,,ENST00000513315,;	A
TCGA-L9-A7SV-01A-11D-A397-08	UGT2B4	0	.	GRCh37	4	70361499	70361499	+	Silent	SNP	C	C	G	.	.	LUAD		TCGA-L9-A7SV-01A-11D-A397-08	TCGA-L9-A7SV-10A-01D-A39A-08	C	C	.	.	.	.	.	.	.	.	.	.	.	.	.	.	.	c.81G>C	p.%3D	p.L27L	ENST00000305107	1/6	117	84	32	145	145	0	UGT2B4,synonymous_variant,p.%3D,ENST00000510114,;UGT2B4,synonymous_variant,p.%3D,ENST00000305107,;UGT2B4,synonymous_variant,p.%3D,ENST00000512583,;UGT2B4,intron_variant,,ENST00000381096,;UGT2B4,non_coding_transcript_exon_variant,,ENST00000506580,;UGT2B4,intron_variant,,ENST00000503836,;UGT2B4,intron_variant,,ENST00000502655,;	G
TCGA-L9-A7SV-01A-11D-A397-08	UGT3A1	0	.	GRCh37	5	35954310	35954310	+	Missense_Mutation	SNP	C	C	A	.	.	LUAD		TCGA-L9-A7SV-01A-11D-A397-08	TCGA-L9-A7SV-10A-01D-A39A-08	C	C	.	.	.	.	.	.	.	.	.	.	.	.	.	.	.	c.1566G>T	p.Lys522Asn	p.K522N	ENST00000274278	7/7	97	81	16	35	35	0	UGT3A1,missense_variant,p.Lys522Asn,ENST00000274278,;UGT3A1,downstream_gene_variant,,ENST00000507113,;UGT3A1,downstream_gene_variant,,ENST00000503189,;UGT3A1,downstream_gene_variant,,ENST00000513233,;UGT3A1,3_prime_UTR_variant,,ENST00000515801,;	A
TCGA-L9-A7SV-01A-11D-A397-08	UGT3A1	0	.	GRCh37	5	35957362	35957362	+	Missense_Mutation	SNP	G	G	A	novel	.	LUAD		TCGA-L9-A7SV-01A-11D-A397-08	TCGA-L9-A7SV-10A-01D-A39A-08	G	G	.	.	.	.	.	.	.	.	.	.	.	.	.	.	.	c.1003C>T	p.His335Tyr	p.H335Y	ENST00000274278	5/7	123	107	15	40	40	0	UGT3A1,missense_variant,p.His335Tyr,ENST00000274278,;UGT3A1,missense_variant,p.His301Tyr,ENST00000507113,;UGT3A1,missense_variant,p.His335Tyr,ENST00000503189,;UGT3A1,downstream_gene_variant,,ENST00000333811,;UGT3A1,non_coding_transcript_exon_variant,,ENST00000513233,;UGT3A1,3_prime_UTR_variant,,ENST00000515801,;	A
TCGA-L9-A8F4-01A-11D-A397-08	UGT2B15	0	.	GRCh37	4	69536145	69536145	+	Frame_Shift_Del	DEL	G	G	-	rs781101739	.	LUAD		TCGA-L9-A8F4-01A-11D-A397-08	TCGA-L9-A8F4-10A-01D-A39A-08	G	G	.	.	.	.	.	.	.	.	.	.	.	.	.	.	.	c.192delC	p.Asn65MetfsTer10	p.N65Mfs*10	ENST00000338206	1/6	343	247	96	238	238	0	UGT2B15,frameshift_variant,p.Asn65MetfsTer10,ENST00000338206,;	-
TCGA-MN-A4N4-01A-12D-A24P-08	UGT1A9	0	.	GRCh37	2	234581326	234581326	+	Nonsense_Mutation	SNP	C	C	G	novel	.	LUAD		TCGA-MN-A4N4-01A-12D-A24P-08	TCGA-MN-A4N4-10A-01D-A24P-08	C	C	.	.	.	.	.	.	.	.	.	.	.	.	.	.	.	c.746C>G	p.Ser249Ter	p.S249*	ENST00000354728	1/5	415	398	17	404	403	1	UGT1A8,stop_gained,p.Ser249Ter,ENST00000609637,;UGT1A9,stop_gained,p.Ser249Ter,ENST00000354728,;UGT1A10,intron_variant,,ENST00000373445,;UGT1A10,intron_variant,,ENST00000344644,;UGT1A8,intron_variant,,ENST00000373450,;	G
TCGA-MN-A4N4-01A-12D-A24P-08	UGT3A2	0	.	GRCh37	5	36037942	36037942	+	Missense_Mutation	SNP	C	C	T	.	.	LUAD		TCGA-MN-A4N4-01A-12D-A24P-08	TCGA-MN-A4N4-10A-01D-A24P-08	C	C	.	.	.	.	.	.	.	.	.	.	.	.	.	.	.	c.1252G>A	p.Glu418Lys	p.E418K	ENST00000282507	6/7	340	327	12	165	165	0	UGT3A2,missense_variant,p.Glu384Lys,ENST00000513300,;UGT3A2,missense_variant,p.Glu116Lys,ENST00000545528,;UGT3A2,missense_variant,p.Glu418Lys,ENST00000282507,;UGT3A2,downstream_gene_variant,,ENST00000504954,;UGT3A2,3_prime_UTR_variant,,ENST00000504685,;	T
TCGA-MN-A4N5-01A-11D-A24P-08	UGT2A1	0	.	GRCh37	4	70455092	70455092	+	Frame_Shift_Del	DEL	A	A	-	novel	.	LUAD		TCGA-MN-A4N5-01A-11D-A24P-08	TCGA-MN-A4N5-10A-01D-A24P-08	A	A	.	.	.	.	.	.	.	.	.	.	.	.	.	.	.	c.2080delT	p.Ter694Arg	p.*694R	ENST00000514019	7/7	45	37	8	36	36	0	UGT2A1,frameshift_variant,p.Ter528delextTer?,ENST00000286604,;UGT2A1,frameshift_variant,p.Ter694Arg,ENST00000514019,;UGT2A1,frameshift_variant,p.Ter528Arg,ENST00000503640,;UGT2A2,frameshift_variant,p.Ter494Arg,ENST00000604021,;UGT2A2,frameshift_variant,p.Ter537Arg,ENST00000457664,;UGT2A1,frameshift_variant,p.Ter484Arg,ENST00000512704,;UGT2A2,frameshift_variant,p.Ter538Arg,ENST00000604629,;UGT2A1,…	-
TCGA-MN-A4N5-01A-11D-A24P-08	UGT3A1	0	.	GRCh37	5	35957301	35957301	+	Missense_Mutation	SNP	C	C	A	novel	.	LUAD		TCGA-MN-A4N5-01A-11D-A24P-08	TCGA-MN-A4N5-10A-01D-A24P-08	C	C	.	.	.	.	.	.	.	.	.	.	.	.	.	.	.	c.1064G>T	p.Ser355Ile	p.S355I	ENST00000274278	5/7	63	30	33	44	44	0	UGT3A1,missense_variant,p.Ser355Ile,ENST00000274278,;UGT3A1,missense_variant,p.Ser321Ile,ENST00000507113,;UGT3A1,missense_variant,p.Ser355Ile,ENST00000503189,;UGT3A1,downstream_gene_variant,,ENST00000333811,;UGT3A1,non_coding_transcript_exon_variant,,ENST00000513233,;UGT3A1,3_prime_UTR_variant,,ENST00000515801,;	A
TCGA-MP-A4SV-01A-11D-A24P-08	UGT2B7	0	.	GRCh37	4	69973927	69973927	+	Silent	SNP	A	A	G	rs545832745	.	LUAD		TCGA-MP-A4SV-01A-11D-A24P-08	TCGA-MP-A4SV-10A-01D-A24P-08	A	A	.	.	.	.	.	.	.	.	.	.	.	.	.	.	.	c.1197A>G	p.%3D	p.Q399Q	ENST00000305231	5/6	143	133	10	169	169	0	UGT2B7,synonymous_variant,p.%3D,ENST00000305231,;UGT2B7,synonymous_variant,p.%3D,ENST00000502942,;UGT2B7,intron_variant,,ENST00000508661,;UGT2B7,intron_variant,,ENST00000509763,;	G
TCGA-MP-A4T4-01A-11D-A25L-08	UGT2A1	0	.	GRCh37	4	70460961	70460961	+	Missense_Mutation	SNP	A	A	T	novel	.	LUAD		TCGA-MP-A4T4-01A-11D-A25L-08	TCGA-MP-A4T4-10A-01D-A25L-08	A	A	.	.	.	.	.	.	.	.	.	.	.	.	.	.	.	c.1501T>A	p.Trp501Arg	p.W501R	ENST00000514019	5/7	69	54	15	95	94	1	UGT2A1,missense_variant,p.Trp335Arg,ENST00000286604,;UGT2A1,missense_variant,p.Trp501Arg,ENST00000514019,;UGT2A1,missense_variant,p.Trp335Arg,ENST00000503640,;UGT2A2,missense_variant,p.Trp301Arg,ENST00000604021,;UGT2A2,missense_variant,p.Trp344Arg,ENST00000457664,;UGT2A1,missense_variant,p.Trp291Arg,ENST00000512704,;UGT2A2,missense_variant,p.Trp345Arg,ENST00000604629,;UGT2A1,non_coding_transcript…	T
TCGA-MP-A4T4-01A-11D-A25L-08	UGT2B17	0	.	GRCh37	4	69434196	69434196	+	Missense_Mutation	SNP	G	G	T	rs772952738	.	LUAD		TCGA-MP-A4T4-01A-11D-A25L-08	TCGA-MP-A4T4-10A-01D-A25L-08	G	G	.	.	.	.	.	.	.	.	.	.	.	.	.	.	.	c.7C>A	p.Leu3Met	p.L3M	ENST00000317746	1/6	448	398	50	436	436	0	UGT2B17,missense_variant,p.Leu3Met,ENST00000317746,;	T
TCGA-MP-A4T4-01A-11D-A25L-08	UGT2B28	0	.	GRCh37	4	70156389	70156389	+	Missense_Mutation	SNP	G	G	T	rs200642416	.	LUAD		TCGA-MP-A4T4-01A-11D-A25L-08	TCGA-MP-A4T4-10A-01D-A25L-08	G	G	.	.	.	.	.	.	.	.	.	.	.	.	.	.	.	c.1170G>T	p.Met390Ile	p.M390I	ENST00000335568	5/6	237	207	30	275	275	0	UGT2B28,missense_variant,p.Met390Ile,ENST00000335568,;UGT2B28,intron_variant,,ENST00000511240,;	T
TCGA-MP-A4T4-01A-11D-A25L-08	UGT3A1	0	.	GRCh37	5	35955712	35955712	+	Intron	SNP	A	A	T	novel	.	LUAD		TCGA-MP-A4T4-01A-11D-A25L-08	TCGA-MP-A4T4-10A-01D-A25L-08	A	A	.	.	.	.	.	.	.	.	.	.	.	.	.	.	.	c.1295+35T>A	.	.	ENST00000274278	.	55	47	8	61	61	0	UGT3A1,3_prime_UTR_variant,,ENST00000507113,;UGT3A1,3_prime_UTR_variant,,ENST00000503189,;UGT3A1,intron_variant,,ENST00000274278,;UGT3A1,downstream_gene_variant,,ENST00000513233,;UGT3A1,3_prime_UTR_variant,,ENST00000515801,;	T
TCGA-MP-A4T7-01A-11D-A24P-08	UGT1A7	0	.	GRCh37	2	234590605	234590605	+	Missense_Mutation	SNP	G	G	T	novel	.	LUAD		TCGA-MP-A4T7-01A-11D-A24P-08	TCGA-MP-A4T7-10A-01D-A24P-08	G	G	.	.	.	.	.	.	.	.	.	.	.	.	.	.	.	c.22G>T	p.Gly8Cys	p.G8C	ENST00000373426	1/5	139	95	43	123	123	0	UGT1A7,missense_variant,p.Gly8Cys,ENST00000373426,;UGT1A10,intron_variant,,ENST00000373445,;UGT1A10,intron_variant,,ENST00000344644,;UGT1A8,intron_variant,,ENST00000373450,;UGT1A8,intron_variant,,ENST00000609637,;UGT1A9,intron_variant,,ENST00000354728,;UGT1A7,upstream_gene_variant,,ENST00000485022,;	T
TCGA-MP-A4TC-01A-11D-A24P-08	UGT1A4	0	.	GRCh37	2	234627630	234627630	+	Missense_Mutation	SNP	G	G	T	novel	.	LUAD		TCGA-MP-A4TC-01A-11D-A24P-08	TCGA-MP-A4TC-10A-01D-A24P-08	G	G	.	.	.	.	.	.	.	.	.	.	.	.	.	.	.	c.164G>T	p.Gly55Val	p.G55V	ENST00000373409	1/5	52	41	11	77	77	0	UGT1A4,missense_variant,p.Gly55Val,ENST00000373409,;UGT1A10,intron_variant,,ENST00000373445,;UGT1A6,intron_variant,,ENST00000305139,;UGT1A6,intron_variant,,ENST00000373424,;UGT1A8,intron_variant,,ENST00000608381,;UGT1A7,intron_variant,,ENST00000373426,;UGT1A8,intron_variant,,ENST00000609637,;UGT1A5,intron_variant,,ENST00000373414,;UGT1A6,intron_variant,,ENST00000406651,;UGT1A10,intron_variant,,EN…	T
TCGA-MP-A4TC-01A-11D-A24P-08	UGT3A1	0	.	GRCh37	5	35954354	35954354	+	Missense_Mutation	SNP	C	C	A	novel	.	LUAD		TCGA-MP-A4TC-01A-11D-A24P-08	TCGA-MP-A4TC-10A-01D-A24P-08	C	C	.	.	.	.	.	.	.	.	.	.	.	.	.	.	.	c.1522G>T	p.Gly508Cys	p.G508C	ENST00000274278	7/7	83	71	12	36	36	0	UGT3A1,missense_variant,p.Gly508Cys,ENST00000274278,;UGT3A1,downstream_gene_variant,,ENST00000507113,;UGT3A1,downstream_gene_variant,,ENST00000503189,;UGT3A1,downstream_gene_variant,,ENST00000513233,;UGT3A1,3_prime_UTR_variant,,ENST00000515801,;	A
TCGA-MP-A4TD-01A-32D-A25L-08	UGT2B4	0	.	GRCh37	4	70361502	70361502	+	Silent	SNP	C	C	A	.	.	LUAD		TCGA-MP-A4TD-01A-32D-A25L-08	TCGA-MP-A4TD-10A-01D-A25L-08	C	C	.	.	.	.	.	.	.	.	.	.	.	.	.	.	.	c.78G>T	p.%3D	p.V26V	ENST00000305107	1/6	234	225	9	224	224	0	UGT2B4,synonymous_variant,p.%3D,ENST00000510114,;UGT2B4,synonymous_variant,p.%3D,ENST00000305107,;UGT2B4,synonymous_variant,p.%3D,ENST00000512583,;UGT2B4,intron_variant,,ENST00000381096,;UGT2B4,non_coding_transcript_exon_variant,,ENST00000506580,;UGT2B4,intron_variant,,ENST00000503836,;UGT2B4,intron_variant,,ENST00000502655,;	A
TCGA-MP-A4TF-01A-11D-A25L-08	UGT2A1	0	.	GRCh37	4	70513163	70513163	+	Frame_Shift_Del	DEL	G	G	-	rs145089093	.	LUAD		TCGA-MP-A4TF-01A-11D-A25L-08	TCGA-MP-A4TF-10A-01D-A25L-08	G	G	.	.	.	.	.	.	.	.	.	.	.	.	.	.	.	c.200delC	p.Pro67HisfsTer3	p.P67Hfs*3	ENST00000514019	2/7	81	65	16	94	94	0	UGT2A1,frameshift_variant,p.Pro67HisfsTer3,ENST00000505512,;UGT2A1,frameshift_variant,p.Pro67HisfsTer3,ENST00000286604,;UGT2A1,frameshift_variant,p.Pro67HisfsTer3,ENST00000514019,;UGT2A1,frameshift_variant,p.Pro67HisfsTer3,ENST00000512704,;UGT2A1,frameshift_variant,p.Pro67HisfsTer3,ENST00000503640,;	-
TCGA-NJ-A4YF-01A-12D-A25L-08	UGT2B4	0	.	GRCh37	4	70346450	70346450	+	Missense_Mutation	SNP	G	G	T	novel	.	LUAD		TCGA-NJ-A4YF-01A-12D-A25L-08	TCGA-NJ-A4YF-10A-01D-A25L-08	G	G	.	.	.	.	.	.	.	.	.	.	.	.	.	.	.	c.1489C>A	p.Leu497Met	p.L497M	ENST00000305107	6/6	171	135	36	202	202	0	UGT2B4,missense_variant,p.Leu497Met,ENST00000305107,;UGT2B4,missense_variant,p.Leu361Met,ENST00000381096,;UGT2B4,3_prime_UTR_variant,,ENST00000512583,;AC108078.1,downstream_gene_variant,,ENST00000583573,;UGT2B4,non_coding_transcript_exon_variant,,ENST00000506580,;UGT2B4,downstream_gene_variant,,ENST00000502655,;	T
TCGA-NJ-A4YI-01A-11D-A25L-08	UGT1A8	0	.	GRCh37	2	234526615	234526615	+	Silent	SNP	C	C	A	rs368298766	.	LUAD		TCGA-NJ-A4YI-01A-11D-A25L-08	TCGA-NJ-A4YI-10A-01D-A25L-08	C	C	.	.	.	.	.	.	.	.	.	.	.	.	.	.	.	c.262C>A	p.%3D	p.R88R	ENST00000373450	1/5	221	147	73	201	200	1	UGT1A8,synonymous_variant,p.%3D,ENST00000373450,;	A
TCGA-NJ-A4YI-01A-11D-A25L-08	UGT2A1	0	.	GRCh37	4	70455183	70455183	+	Silent	SNP	G	G	T	novel	.	LUAD		TCGA-NJ-A4YI-01A-11D-A25L-08	TCGA-NJ-A4YI-10A-01D-A25L-08	G	G	.	.	.	.	.	.	.	.	.	.	.	.	.	.	.	c.1989C>A	p.%3D	p.V663V	ENST00000514019	7/7	121	92	28	163	163	0	UGT2A1,synonymous_variant,p.%3D,ENST00000286604,;UGT2A1,synonymous_variant,p.%3D,ENST00000514019,;UGT2A1,synonymous_variant,p.%3D,ENST00000503640,;UGT2A2,synonymous_variant,p.%3D,ENST00000604021,;UGT2A2,synonymous_variant,p.%3D,ENST00000457664,;UGT2A1,synonymous_variant,p.%3D,ENST00000512704,;UGT2A2,synonymous_variant,p.%3D,ENST00000604629,;UGT2A1,downstream_gene_variant,,ENST00000502343,;RP11-40…	T
TCGA-NJ-A4YP-01A-11D-A25L-08	UGT2A1	0	.	GRCh37	4	70513316	70513316	+	Missense_Mutation	SNP	C	C	A	novel	.	LUAD		TCGA-NJ-A4YP-01A-11D-A25L-08	TCGA-NJ-A4YP-10A-01D-A25L-08	C	C	.	.	.	.	.	.	.	.	.	.	.	.	.	.	.	c.47G>T	p.Gly16Val	p.G16V	ENST00000514019	2/7	42	33	8	46	46	0	UGT2A1,missense_variant,p.Gly16Val,ENST00000505512,;UGT2A1,missense_variant,p.Gly16Val,ENST00000286604,;UGT2A1,missense_variant,p.Gly16Val,ENST00000514019,;UGT2A1,missense_variant,p.Gly16Val,ENST00000512704,;UGT2A1,missense_variant,p.Gly16Val,ENST00000503640,;	A
TCGA-NJ-A4YP-01A-11D-A25L-08	UGT2A1	0	.	GRCh37	4	70513317	70513317	+	Nonsense_Mutation	SNP	C	C	A	rs749045921	.	LUAD		TCGA-NJ-A4YP-01A-11D-A25L-08	TCGA-NJ-A4YP-10A-01D-A25L-08	C	C	.	.	.	.	.	.	.	.	.	.	.	.	.	.	.	c.46G>T	p.Gly16Ter	p.G16*	ENST00000514019	2/7	42	33	8	46	46	0	UGT2A1,stop_gained,p.Gly16Ter,ENST00000505512,;UGT2A1,stop_gained,p.Gly16Ter,ENST00000286604,;UGT2A1,stop_gained,p.Gly16Ter,ENST00000514019,;UGT2A1,stop_gained,p.Gly16Ter,ENST00000512704,;UGT2A1,stop_gained,p.Gly16Ter,ENST00000503640,;	A
TCGA-NJ-A4YQ-01A-11D-A25L-08	UGT2B7	0	.	GRCh37	4	69972945	69972945	+	Missense_Mutation	SNP	G	G	T	rs750912051	.	LUAD		TCGA-NJ-A4YQ-01A-11D-A25L-08	TCGA-NJ-A4YQ-10A-01D-A25L-08	G	G	.	.	.	.	.	.	.	.	.	.	.	.	.	.	.	c.1055G>T	p.Arg352Leu	p.R352L	ENST00000305231	4/6	171	124	47	178	178	0	UGT2B7,missense_variant,p.Arg352Leu,ENST00000305231,;UGT2B7,missense_variant,p.Arg352Leu,ENST00000508661,;UGT2B7,missense_variant,p.Arg103Leu,ENST00000502942,;UGT2B7,non_coding_transcript_exon_variant,,ENST00000509763,;	T
TCGA-NJ-A4YQ-01A-11D-A25L-08	UGT3A2	0	.	GRCh37	5	36066972	36066972	+	5'UTR	SNP	C	C	G	novel	.	LUAD		TCGA-NJ-A4YQ-01A-11D-A25L-08	TCGA-NJ-A4YQ-10A-01D-A25L-08	C	C	.	.	.	.	.	.	.	.	.	.	.	.	.	.	.	c.-81G>C	.	.	ENST00000282507	1/7	38	30	8	79	79	0	UGT3A2,5_prime_UTR_variant,,ENST00000513300,;UGT3A2,5_prime_UTR_variant,,ENST00000545528,;UGT3A2,5_prime_UTR_variant,,ENST00000515131,;UGT3A2,5_prime_UTR_variant,,ENST00000282507,;UGT3A2,intron_variant,,ENST00000504954,;UGT3A2,5_prime_UTR_variant,,ENST00000504685,;CTD-2197M16.1,downstream_gene_variant,,ENST00000505367,;	G
TCGA-NJ-A55A-01A-11D-A25L-08	UGT3A2	0	.	GRCh37	5	36064394	36064394	+	Missense_Mutation	SNP	A	A	T	novel	.	LUAD		TCGA-NJ-A55A-01A-11D-A25L-08	TCGA-NJ-A55A-10A-01D-A25L-08	A	A	.	.	.	.	.	.	.	.	.	.	.	.	.	.	.	c.153T>A	p.His51Gln	p.H51Q	ENST00000282507	2/7	74	70	4	67	67	0	UGT3A2,missense_variant,p.His51Gln,ENST00000515131,;UGT3A2,missense_variant,p.His51Gln,ENST00000282507,;UGT3A2,5_prime_UTR_variant,,ENST00000545528,;UGT3A2,intron_variant,,ENST00000513300,;UGT3A2,non_coding_transcript_exon_variant,,ENST00000504954,;UGT3A2,missense_variant,p.His51Gln,ENST00000504685,;	T
TCGA-O1-A52J-01A-11D-A25L-08	UGT2A3	0	.	GRCh37	4	69811034	69811034	+	Missense_Mutation	SNP	G	G	A	novel	.	LUAD		TCGA-O1-A52J-01A-11D-A25L-08	TCGA-O1-A52J-10A-01D-A25L-08	G	G	.	.	.	.	.	.	.	.	.	.	.	.	.	.	.	c.854C>T	p.Ala285Val	p.A285V	ENST00000251566	2/6	76	62	13	60	60	0	UGT2A3,missense_variant,p.Ala285Val,ENST00000251566,;UGT2A3,5_prime_UTR_variant,,ENST00000420231,;UGT2A3,missense_variant,p.Ala151Val,ENST00000503012,;	A
[truncated: 67 more columns]

## Sheet: 495 LUAD with UGT levels
495 LUAD patients with clinicopathological data and the expression levels (RSEM) of all UGT genes
mutation patient ID	gene_id	UGT1A10|54575	UGT1A1|54658	UGT1A3|54659	UGT1A4|54657	UGT1A5|54579	UGT1A6|54578	UGT1A7|54577	UGT1A8|54576	UGT1A9|54600	UGT2A1|10941	UGT2A3|79799	UGT2B10|7365	UGT2B11|10720	UGT2B15|7366	UGT2B28|54490	UGT2B4|7363	UGT2B7|7364	UGT3A1|133688	UGT3A2|167127	UGT8|7368	bcr_patient_barcode	type	age_at_initial_pathologic_diagnosis	gender	race	ajcc_pathologic_tumor_stage	clinical_stage	histological_type	histological_grade	initial_pathologic_dx_year	menopause_status	birth_days_to	vital_status	tumor_status	last_contact_days_to	death_days_to	cause_of_death	new_tumor_event_type	new_tumor_event_site	new_tumor_event_site_other	new_tumor_event_dx_days_to	treatment_outcome_first_course	margin_status	residual_tumor	OS	OS.time	DSS	DSS.time
TCGA-91-8499	TCGA-91-8499-01A-11R-2403-07	0	2.0204	0.9807	0.9688	0	17.8881	0	0	0	5834.88	1.7723	0	7.6798	2.9538	58.4847	2.363	0.5908	25.9932	14.7689	1075.17	TCGA-91-8499	LUAD	76	FEMALE	WHITE	Stage IA	[Not Applicable]	Lung Adenocarcinoma	[Not Available]	2011	[Not Available]	-27853	Alive	#N/A	36	#N/A	[Not Available]	#N/A	#N/A	#N/A	#N/A	[Unknown]	#N/A	#N/A	0	36	0	36
TCGA-55-8512	TCGA-55-8512-01A-11R-2403-07	70.8765	42.9396	1.4698	0	0.8124	800.567	2.9717	31.0476	48.7814	468.199	0	0	0	0	1.0689	3.7413	5.3447	0	5.3447	63.0679	TCGA-55-8512	LUAD	41	MALE	WHITE	Stage IV	[Not Applicable]	Lung Adenocarcinoma	[Not Available]	2012	[Not Available]	-15266	Dead	WITH TUMOR	#N/A	607	[Not Available]	#N/A	#N/A	#N/A	#N/A	Progressive Disease	#N/A	#N/A	1	607	1	607
TCGA-55-A4DF	TCGA-55-A4DF-01A-11R-A24H-07	2.0481	52.0296	12.1359	2.1452	0	4071.59	0	0	422.233	312.529	0	0	0	0.4623	0	0.9246	0.4623	45.3074	6.9348	469.718	TCGA-55-A4DF	LUAD	88	MALE	WHITE	Stage IA	[Not Applicable]	Lung Adenocarcinoma	[Not Available]	2012	[Not Available]	-32432	Dead	WITH TUMOR	#N/A	614	[Not Available]	Distant Metastasis	#N/A	#N/A	515	Complete Remission/Response	#N/A	#N/A	1	614	1	614
TCGA-49-AARR	TCGA-49-AARR-01A-11R-A41B-07	22.5029	7.4959	0	0	0	160.143	0	0	6.3069	310.244	0	0	0.5103	1.0205	1.5308	7.654	4.0822	4.5924	14.7978	82.1533	TCGA-49-AARR	LUAD	68	MALE	BLACK OR AFRICAN AMERICAN	Stage IA	[Not Applicable]	Lung Adenocarcinoma	[Not Available]	2001	[Not Available]	-24942	Alive	WITH TUMOR	4992	#N/A	[Not Available]	New Primary Tumor	#N/A	#N/A	1099	Complete Remission/Response	#N/A	#N/A	0	4992	0	4992
TCGA-NJ-A55A	TCGA-NJ-A55A-01A-11R-A262-07	0	0	0	0	0	251.018	0	0	20.8585	247.399	0	0	0	3.4968	0	7.8678	5.2452	0	1.7484	122.388	TCGA-NJ-A55A	LUAD	76	FEMALE	WHITE	Stage IB	[Not Applicable]	Lung Adenocarcinoma	[Not Available]	2009	[Not Available]	-28022	Alive	TUMOR FREE	15	#N/A	[Not Available]	#N/A	#N/A	#N/A	#N/A	Stable Disease	#N/A	#N/A	0	15	0	15
TCGA-75-7025	TCGA-75-7025-01A-12R-1949-07	1.7171	0	0	0	0	70.0719	0	0	9.5272	180.787	0	0	0.3782	36.3086	0.3782	5.295	0	0	6.8079	185.325	TCGA-75-7025	LUAD	#N/A	MALE	[Not Available]	Stage IB	[Not Applicable]	Lung Adenocarcinoma	[Not Available]	#N/A	[Not Available]	#N/A	Alive	TUMOR FREE	3305	#N/A	[Not Available]	Locoregional Recurrence|Distant Metastasis	#N/A	#N/A	1481	Complete Remission/Response	#N/A	#N/A	0	3305	0	3305
TCGA-44-6147	TCGA-44-6147-01A-11R-1755-07	11.929	4.0984	1.7049	0	0	98.7104	0	0	16.3443	168.306	2.7322	3.2787	3.8251	244.809	0.5464	3.8251	2.1858	0	6.5574	70.4918	TCGA-44-6147	LUAD	67	FEMALE	WHITE	Stage IA	[Not Applicable]	Lung Adenocarcinoma	[Not Available]	2010	[Not Available]	-24631	Alive	TUMOR FREE	845	#N/A	[Not Available]	#N/A	#N/A	#N/A	#N/A	Complete Remission/Response	#N/A	#N/A	0	845	0	845
TCGA-78-7536	TCGA-78-7536-01A-11R-2066-07	0	0	0	0	0	0.5118	0	0	0	136.909	0	5.6299	377.728	16.122	49.6454	36.3384	10.748	2.8149	1.2795	453.462	TCGA-78-7536	LUAD	69	MALE	WHITE	Stage IIIA	[Not Applicable]	Lung Adenocarcinoma	[Not Available]	2001	[Not Available]	-25558	Dead	WITH TUMOR	#N/A	244	[Not Available]	#N/A	#N/A	#N/A	231	Progressive Disease	#N/A	#N/A	1	244	1	244
TCGA-91-A4BC	TCGA-91-A4BC-01A-11R-A24H-07	0	0	0	0	0	0.6527	0	0	0	119.452	0	0	9.7911	4.5692	7.8329	2847.91	35.9008	1.3055	5.2219	13.7076	TCGA-91-A4BC	LUAD	59	MALE	WHITE	Stage IIA	[Not Applicable]	Lung Adenocarcinoma	[Not Available]	2012	[Not Available]	-21565	Alive	#N/A	44	#N/A	[Not Available]	#N/A	#N/A	#N/A	#N/A	[Unknown]	#N/A	#N/A	0	44	0	44
TCGA-95-7947	TCGA-95-7947-01A-11R-2187-07	0	0	0	0	0	5.8063	0	0	0	106.041	1.528	0.9168	0.3056	5.8063	0.3056	0.6112	1.2224	0	1.528	292.453	TCGA-95-7947	LUAD	67	MALE	WHITE	Stage IA	[Not Applicable]	Lung Adenocarcinoma	[Not Available]	2011	[Not Available]	-24752	Alive	TUMOR FREE	477	#N/A	[Not Available]	#N/A	#N/A	#N/A	#N/A	Complete Remission/Response	#N/A	#N/A	0	477	0	477
TCGA-55-8094	TCGA-55-8094-01A-11R-2241-07	7.2538	0	0	0	0	2.8789	0.596	0	0	89.4055	0.596	20.2652	902.035	2395.47	10.7287	829.087	192.52	2.9802	0.596	399.344	TCGA-55-8094	LUAD	51	MALE	WHITE	Stage IV	[Not Applicable]	Lung Adenocarcinoma	[Not Available]	2012	[Not Available]	-18903	Alive	WITH TUMOR	541	#N/A	[Not Available]	#N/A	#N/A	#N/A	#N/A	Progressive Disease	#N/A	#N/A	0	541	0	541
TCGA-64-1680	TCGA-64-1680-01A-02R-0946-07	1.7564	0	0	1.1584	0	10.2242	0	0	1.8087	76.9806	0	0	0	1.4948	0	2.2422	0.7474	0.7474	0	184.604	TCGA-64-1680	LUAD	63	MALE	WHITE	Stage IV	[Not Applicable]	Lung Adenocarcinoma	[Not Available]	2007	[Not Available]	-23267	Alive	TUMOR FREE	1126	#N/A	[Not Available]	#N/A	#N/A	#N/A	#N/A	Complete Remission/Response	#N/A	#N/A	0	1126	0	1126
TCGA-55-7995	TCGA-55-7995-01A-11R-2187-07	1543.16	113.176	12.5497	10.1563	2.2406	8025.3	0.4498	205.89	405.205	70.1605	0	0	0.8487	5.3752	1.1316	1.6974	26.3102	0	13.5795	312.328	TCGA-55-7995	LUAD	73	FEMALE	WHITE	Stage IA	[Not Applicable]	Lung Adenocarcinoma	[Not Available]	2012	[Not Available]	-26837	Alive	TUMOR FREE	889	#N/A	[Not Available]	Locoregional Recurrence	#N/A	#N/A	468	Complete Remission/Response	#N/A	#N/A	0	889	0	889
TCGA-55-7573	TCGA-55-7573-01A-11R-2039-07	3.1465	0	0	0	0	42.0897	0	0	3.6029	61.6493	0	0	0.8006	8.0064	0	4.8038	0	0	1.6013	120.897	TCGA-55-7573	LUAD	72	FEMALE	WHITE	Stage IA	[Not Applicable]	Lung Adenocarcinoma	[Not Available]	2011	[Not Available]	-26302	Alive	TUMOR FREE	487	#N/A	[Not Available]	#N/A	#N/A	#N/A	#N/A	Complete Remission/Response	#N/A	#N/A	0	487	0	487
TCGA-MP-A4TA	TCGA-MP-A4TA-01A-21R-A24X-07	5.1423	8.0709	6.8711	0.7473	0	754.768	0	0	62.5916	57.7645	0.4039	6.8671	0	31.1039	0.4039	23.4289	60.1882	1.6158	36.3553	169.658	TCGA-MP-A4TA	LUAD	75	FEMALE	WHITE	Stage IA	[Not Applicable]	Lung Adenocarcinoma	[Not Available]	2006	[Not Available]	-27513	Dead	WITH TUMOR	#N/A	950	[Not Available]	Distant Metastasis	#N/A	#N/A	725	Complete Remission/Response	#N/A	#N/A	1	950	1	950
TCGA-62-A46Y	TCGA-62-A46Y-01A-11R-A24H-07	8.2055	0	0	0.8772	0	42.0301	0	0	2.5213	56.6416	0.5013	0	0	1.5038	0	1.5038	38.0952	0	0.5013	120.301	TCGA-62-A46Y	LUAD	70	FEMALE	WHITE	Stage IIIA	[Not Applicable]	Lung Adenocarcinoma	[Not Available]	2008	[Not Available]	-25905	Dead	WITH TUMOR	#N/A	414	[Not Available]	Distant Metastasis	#N/A	#N/A	314	Complete Remission/Response	#N/A	#N/A	1	414	1	414
TCGA-64-1681	TCGA-64-1681-01A-11R-2066-07	16.3188	2.0819	1.0192	0	0	30.5557	0	6.0468	0	51.6852	0.3614	0	4.3372	32.5291	0	23.8547	3.6143	0	31.8063	6.8673	TCGA-64-1681	LUAD	61	FEMALE	WHITE	Stage IA	[Not Applicable]	Lung Adenocarcinoma	[Not Available]	2008	[Not Available]	-22525	Dead	#N/A	#N/A	1167	[Not Available]	#N/A	#N/A	#N/A	439	[Not Available]	#N/A	#N/A	1	1167	#N/A	1167
TCGA-50-6593	TCGA-50-6593-01A-11R-1755-07	0	0	0	0	0	61.2444	0	0	1.6164	48.7492	0	0	0	0.6414	0	0	2.5657	0	0	10.263	TCGA-50-6593	LUAD	49	FEMALE	WHITE	Stage IIIA	[Not Applicable]	Lung Adenocarcinoma	[Not Available]	2008	[Not Available]	-18152	Dead	WITH TUMOR	#N/A	336	[Not Available]	Distant Metastasis	#N/A	#N/A	266	Progressive Disease	#N/A	#N/A	1	336	1	336
TCGA-50-5946	TCGA-50-5946-01A-11R-1755-07	2.5957	0	0	0	0	39.54	0	0	0	46.3171	0.3216	0	0.3216	0.6433	0	1.6082	0.3216	0.6433	0	333.226	TCGA-50-5946	LUAD	62	MALE	WHITE	Stage IA	[Not Applicable]	Lung Adenocarcinoma	[Not Available]	2010	[Not Available]	-22852	Alive	WITH TUMOR	1617	#N/A	[Not Available]	Distant Metastasis	#N/A	#N/A	221	Progressive Disease	#N/A	#N/A	0	1617	0	1617
TCGA-50-7109	TCGA-50-7109-01A-11R-2039-07	1.8489	0	0	0	0	3.0327	0	0	0	42.1034	0	0	0	13.4243	0	6.7121	1.2204	7.9325	3.051	45.7646	TCGA-50-7109	LUAD	60	MALE	WHITE	Stage IA	[Not Applicable]	Lung Adenocarcinoma	[Not Available]	2011	[Not Available]	-21979	Dead	WITH TUMOR	#N/A	308	[Not Available]	Distant Metastasis	#N/A	#N/A	15	Progressive Disease	#N/A	#N/A	1	308	1	308
TCGA-44-7659	TCGA-44-7659-01A-11R-2066-07	0	0	0	0	0	24.6637	0	0	0	34.3797	0	2.2422	12.7055	20.9268	0	1.4948	0.7474	0	17.1898	125.561	TCGA-44-7659	LUAD	70	MALE	WHITE	Stage IA	[Not Applicable]	Lung Adenocarcinoma	[Not Available]	2010	[Not Available]	-25730	Alive	TUMOR FREE	691	#N/A	[Not Available]	#N/A	#N/A	#N/A	#N/A	Complete Remission/Response	#N/A	#N/A	0	691	0	691
TCGA-55-8616	TCGA-55-8616-01A-11R-2403-07	8.0567	0	0	0	0	27.5368	0	6.3708	8.9811	30.9874	0	0	0.5252	0	0.5252	4.2017	0.5252	3.6765	0	7.8782	TCGA-55-8616	LUAD	58	FEMALE	WHITE	Stage IB	[Not Applicable]	Lung Adenocarcinoma	[Not Available]	2012	[Not Available]	-21225	Alive	TUMOR FREE	48	#N/A	[Not Available]	#N/A	#N/A	#N/A	#N/A	[Not Applicable]	#N/A	#N/A	0	48	0	48
TCGA-05-4427	TCGA-05-4427-01A-21R-1858-07	0	0	0	0	0	0	0	0	0	30.777	0	0	0	0	0	1.5136	0	0	0.5045	459.132	TCGA-05-4427	LUAD	65	FEMALE	[Not Available]	Stage IIB	[Not Applicable]	Lung Adenocarcinoma	[Not Available]	2008	[Not Available]	-23893	Alive	TUMOR FREE	791	#N/A	[Not Available]	#N/A	#N/A	#N/A	#N/A	Complete Remission/Response	#N/A	#N/A	0	791	0	791
TCGA-93-7348	TCGA-93-7348-01A-21R-2039-07	8.8698	0	0	0	0	104.08	0	0	6.5979	30.3807	0	0.6604	0	21.1344	0	1.9813	3.3022	0	9.2463	175.019	TCGA-93-7348	LUAD	75	FEMALE	WHITE	Stage IA	[Not Applicable]	Lung Adenocarcinoma	[Not Available]	2011	[Not Available]	-27456	Alive	TUMOR FREE	531	#N/A	[Not Available]	#N/A	#N/A	#N/A	#N/A	Complete Remission/Response	#N/A	#N/A	0	531	0	531
TCGA-49-AARO	TCGA-49-AARO-01A-12R-A41B-07	1.9256	6.1689	0	0	0	95.6818	0	0	0	26.5206	0	0	0.5765	0	0	3.4592	2.8827	0	2.3061	18.4491	TCGA-49-AARO	LUAD	39	FEMALE	BLACK OR AFRICAN AMERICAN	Stage IA	[Not Applicable]	Lung Adenocarcinoma	[Not Available]	2003	[Not Available]	-14527	Alive	WITH TUMOR	3759	#N/A	[Not Available]	Locoregional Recurrence	#N/A	#N/A	1144	Complete Remission/Response	#N/A	#N/A	0	3759	0	3759
TCGA-69-8255	TCGA-69-8255-01A-11R-2287-07	0	412.804	0.81	0.7878	0	6.4549	0	2.3162	49.5035	25.2427	400.832	41.6089	48.8877	50.4854	8.0444	3826.91	82.9404	0	0.5548	7.4896	TCGA-69-8255	LUAD	71	MALE	WHITE	Stage IA	[Not Applicable]	Lung Adenocarcinoma	[Not Available]	2011	[Not Available]	-26289	Alive	#N/A	129	#N/A	[Not Available]	#N/A	#N/A	#N/A	#N/A	[Unknown]	#N/A	#N/A	0	129	0	129
TCGA-MP-A4TJ	TCGA-MP-A4TJ-01A-51R-A262-07	4.9083	5.0044	0	0	0	65.7293	0	0	18.6812	24.4541	0	0	0	9.607	0	1.7467	3.4934	101.31	15.7205	188.646	TCGA-MP-A4TJ	LUAD	62	FEMALE	[Unknown]	Stage IA	[Not Applicable]	Lung Adenocarcinoma	[Not Available]	2006	[Not Available]	-22875	Dead	#N/A	#N/A	339	[Not Available]	#N/A	#N/A	#N/A	#N/A	Complete Remission/Response	#N/A	#N/A	1	339	#N/A	339
TCGA-73-7499	TCGA-73-7499-01A-11R-2187-07	0	0	0	0	0	12.2399	0	0	2.8004	24.3509	0	0.3581	21.8442	414.682	1.0743	0	85.9445	1.0743	16.4727	357.386	TCGA-73-7499	LUAD	81	FEMALE	WHITE	Stage IB	[Not Applicable]	Lung Adenocarcinoma	[Not Available]	2010	[Not Available]	-29683	Dead	TUMOR FREE	#N/A	1531	[Not Available]	Distant Metastasis	#N/A	#N/A	1447	Complete Remission/Response	#N/A	#N/A	1	1531	0	1531
TCGA-50-5931	TCGA-50-5931-01A-11R-1755-07	10.4861	8.327	0	0	0	557.033	5.4609	7.6578	61.2879	20.8333	0	0.6313	14.5202	12.6263	142.046	0.6313	30.9343	0	23.9899	134.47	TCGA-50-5931	LUAD	75	FEMALE	WHITE	Stage IB	[Not Applicable]	Lung Adenocarcinoma	[Not Available]	2001	[Not Available]	-27733	Dead	WITH TUMOR	#N/A	434	[Not Available]	Distant Metastasis	#N/A	#N/A	425	Progressive Disease	#N/A	#N/A	1	434	1	434
TCGA-55-1594	TCGA-55-1594-01A-01R-0946-07	0	2.0126	36.3758	1.9182	0	323.098	0	0	9.2374	20.4403	0	1.5723	40.3774	14.9371	1.5723	62.5	8.2547	7000.39	79.4025	170.204	TCGA-55-1594	LUAD	68	MALE	WHITE	Stage IIIA	[Not Applicable]	Lung Adenocarcinoma	[Not Available]	2005	[Not Available]	-25008	Alive	TUMOR FREE	1178	#N/A	[Not Available]	#N/A	#N/A	#N/A	#N/A	[Not Available]	#N/A	#N/A	0	1178	0	1178
TCGA-J2-A4AD	TCGA-J2-A4AD-01A-11R-A24H-07	2.4482	37.2757	5.9359	2.6025	0	3956.26	0	0	421.791	20.3004	0.406	20.7065	3.2481	41.0069	1.624	4.8721	395.047	0	0.406	33.2927	TCGA-J2-A4AD	LUAD	61	FEMALE	WHITE	Stage IA	[Not Applicable]	Lung Adenocarcinoma	[Not Available]	2012	[Not Available]	-22414	Dead	WITH TUMOR	#N/A	550	[Not Available]	Locoregional Recurrence|Distant Metastasis	#N/A	#N/A	524	[Unknown]	#N/A	#N/A	1	550	1	550
TCGA-38-4627	TCGA-38-4627-01A-01R-1206-07	6.5159	4.7282	3.112	0	0	3530.02	0	0	80.208	20.0657	0	0.3648	0	62.386	0	11.3097	132.069	0.3648	9.4856	45.9686	TCGA-38-4627	LUAD	64	FEMALE	WHITE	Stage IIA	[Not Applicable]	Lung Adenocarcinoma	[Not Available]	2003	[Not Available]	-23510	Dead	#N/A	#N/A	1147	[Not Available]	#N/A	#N/A	#N/A	#N/A	Complete Remission/Response	#N/A	#N/A	1	1147	#N/A	1147
TCGA-78-7220	TCGA-78-7220-01A-11R-2039-07	12.5286	245.518	42.1156	0	2.2391	1850.81	1.4207	1.3435	118.121	18.5304	2.5737	0.5147	0	7.2063	0	35.5167	19.5599	2.0589	0.5147	246.043	TCGA-78-7220	LUAD	53	FEMALE	WHITE	Stage IIIA	[Not Applicable]	Lung Adenocarcinoma	[Not Available]	2000	[Not Available]	-19480	Dead	WITH TUMOR	#N/A	807	[Not Available]	#N/A	#N/A	#N/A	531	[Not Available]	#N/A	#N/A	1	807	1	807
TCGA-62-A470	TCGA-62-A470-01A-11R-A24H-07	4.1502	34.6921	4.3103	8.3251	4.3103	10433.7	0	0	782.722	18.4729	0	0	0	11.0837	0	3.6946	0	907.635	2.4631	98.5222	TCGA-62-A470	LUAD	84	MALE	WHITE	Stage IB	[Not Applicable]	Lung Adenocarcinoma	[Not Available]	2009	[Not Available]	-30689	Dead	WITH TUMOR	#N/A	1194	[Not Available]	Locoregional Recurrence	#N/A	#N/A	539	Complete Remission/Response	#N/A	#N/A	1	1194	1	1194
TCGA-78-7161	TCGA-78-7161-01A-11R-2039-07	0.8157	0	0	0	0	0.7716	0	1.3521	0	18.3714	0.7349	5.144	687.994	27.1897	116.842	2708.68	7.3486	0	0	9.1857	TCGA-78-7161	LUAD	69	FEMALE	WHITE	Stage IIB	[Not Applicable]	Lung Adenocarcinoma	[Not Available]	2011	[Not Available]	-25294	Dead	WITH TUMOR	#N/A	291	[Not Available]	#N/A	#N/A	#N/A	162	Progressive Disease	#N/A	#N/A	1	291	1	291
TCGA-91-6835	TCGA-91-6835-01A-11R-1858-07	0	0	1.1512	0	0	32.316	0	0	4.0045	15.8014	0	0	0	4.5147	0	0	0.9029	0	0.9029	417.156	TCGA-91-6835	LUAD	81	FEMALE	WHITE	Stage IA	[Not Applicable]	Lung Adenocarcinoma	[Not Available]	2010	[Not Available]	-29887	Alive	TUMOR FREE	79	#N/A	[Not Available]	#N/A	#N/A	#N/A	#N/A	Complete Remission/Response	#N/A	#N/A	0	79	0	79
TCGA-44-6778	TCGA-44-6778-01A-11R-1858-07	4.4289	0	0	0	0	6.2437	0	1.2817	4.5368	15.2284	0	0	0	10.1523	0	32.3604	2.5381	518.401	5.7107	196.701	TCGA-44-6778	LUAD	59	MALE	BLACK OR AFRICAN AMERICAN	Stage IA	[Not Applicable]	Lung Adenocarcinoma	[Not Available]	2007	[Not Available]	-21725	Alive	TUMOR FREE	1864	#N/A	[Not Available]	#N/A	#N/A	#N/A	#N/A	Complete Remission/Response	#N/A	#N/A	0	1864	0	1864
TCGA-97-A4M2	TCGA-97-A4M2-01A-12R-A24X-07	1.4497	6.0831	0	0	0	33.4255	0	1.4305	0	14.9307	0	0	0.4816	7.7062	0	10.596	0	0.9633	0.9633	19.2654	TCGA-97-A4M2	LUAD	66	MALE	WHITE	Stage IA	[Not Applicable]	Lung Adenocarcinoma	[Not Available]	2012	[Not Available]	-24313	Alive	TUMOR FREE	624	#N/A	[Not Available]	#N/A	#N/A	#N/A	#N/A	Complete Remission/Response	#N/A	#N/A	0	624	0	624
TCGA-05-4402	TCGA-05-4402-01A-01R-1206-07	234.511	0	0	0	0	237.879	2.9001	14.9128	28.284	14.4761	0.4825	1.6889	17.8346	89.2696	11.8222	4.3428	22.6793	3.1365	6.273	178.78	TCGA-05-4402	LUAD	57	FEMALE	[Not Available]	Stage IV	[Not Applicable]	Lung Adenocarcinoma	[Not Available]	2007	[Not Available]	-20819	Dead	TUMOR FREE	#N/A	244	[Not Available]	#N/A	#N/A	#N/A	#N/A	Complete Remission/Response	#N/A	#N/A	1	244	0	244
TCGA-35-5375	TCGA-35-5375-01A-01R-1628-07	2.8968	73.3185	49.1898	1.8535	0	18822.5	26.6815	0	2075.73	14.4284	0	0	0	1.1099	0	0	1.1099	0	5.5494	8.879	TCGA-35-5375	LUAD	61	MALE	WHITE	Stage IIIA	[Not Applicable]	Lung Adenocarcinoma	[Not Available]	2010	[Not Available]	-22628	Alive	TUMOR FREE	264	#N/A	[Not Available]	#N/A	#N/A	#N/A	#N/A	[Not Available]	#N/A	#N/A	0	264	0	264
TCGA-50-5072	TCGA-50-5072-01A-21R-1858-07	0	3.8891	0	0	0	458.083	0	0	15.164	13.8568	4.157	0	0.4619	1.8476	0	30.0231	13.8568	10.6236	3.2333	84.9885	TCGA-50-5072	LUAD	74	MALE	WHITE	Stage IIIA	[Not Applicable]	Lung Adenocarcinoma	[Not Available]	2009	[Not Available]	-27036	Dead	WITH TUMOR	#N/A	250	[Not Available]	Distant Metastasis	#N/A	#N/A	213	Progressive Disease	#N/A	#N/A	1	250	1	250
TCGA-67-4679	TCGA-67-4679-01B-01R-1755-07	0	0	0	0	0	5.7381	0	0	0	13.7713	0	0	0	0.5738	0	7.4595	1.1476	0	1.1476	117.63	TCGA-67-4679	LUAD	69	MALE	WHITE	[Discrepancy]	[Not Applicable]	Lung Adenocarcinoma	[Not Available]	2009	[Not Available]	-25202	Alive	TUMOR FREE	448	#N/A	[Not Available]	#N/A	#N/A	#N/A	#N/A	[Not Available]	#N/A	#N/A	0	448	0	448
TCGA-55-7724	TCGA-55-7724-01A-11R-2170-07	124.188	31.7134	10.8317	0	0	1457.75	1352.36	3.0261	30.1503	13.0261	0	0	0	7.014	0	8.016	8.016	0	2.004	109.218	TCGA-55-7724	LUAD	76	FEMALE	WHITE	Stage IB	[Not Applicable]	Lung Adenocarcinoma	[Not Available]	2011	[Not Available]	-27891	Alive	TUMOR FREE	705	#N/A	[Not Available]	#N/A	#N/A	#N/A	#N/A	Complete Remission/Response	#N/A	#N/A	0	705	0	705
TCGA-55-8511	TCGA-55-8511-01A-11R-2403-07	0	0	0	0	0	8.1444	0	0	0	12.4881	0	0.543	0	8.1444	0	0	0	0	0.543	77.1006	TCGA-55-8511	LUAD	73	FEMALE	WHITE	Stage IB	[Not Applicable]	Lung Adenocarcinoma	[Not Available]	2012	[Not Available]	-26986	Alive	WITH TUMOR	552	#N/A	[Not Available]	#N/A	#N/A	#N/A	460	Complete Remission/Response	#N/A	#N/A	0	552	0	552
TCGA-64-5774	TCGA-64-5774-01A-01R-1628-07	0	0	0	0	0	0	0	0	0	12.1666	0	0	11.2307	0	1.4038	7.4871	2.8077	1413.2	130.557	327.094	TCGA-64-5774	LUAD	60	MALE	WHITE	Stage IB	[Not Applicable]	Lung Adenocarcinoma	[Not Available]	2004	[Not Available]	-22059	Alive	TUMOR FREE	2676	#N/A	[Not Available]	#N/A	#N/A	#N/A	246	Complete Remission/Response	#N/A	#N/A	0	2676	0	2676
TCGA-44-5644	TCGA-44-5644-01A-21R-2039-07	1.9618	0	2.0283	0	0	0	0	0	0	11.9701	0	0.665	10.6401	11.9701	0	565.918	17.2901	399.668	0.665	148.296	TCGA-44-5644	LUAD	51	FEMALE	WHITE	Stage IB	[Not Applicable]	Lung Adenocarcinoma	[Not Available]	2010	[Not Available]	-18644	Alive	TUMOR FREE	863	#N/A	[Not Available]	#N/A	#N/A	#N/A	#N/A	Complete Remission/Response	#N/A	#N/A	0	863	0	863
TCGA-MP-A4TE	TCGA-MP-A4TE-01A-22R-A466-07	0	34.7313	23.0396	0	0	4996.71	0	0	310.714	11.4537	0	2.2026	81.185	8.8106	22.467	1687.22	51.5419	15.4185	9.6916	250.661	TCGA-MP-A4TE	LUAD	56	MALE	WHITE	Stage IIA	[Not Applicable]	Lung Adenocarcinoma	[Not Available]	2010	[Not Available]	-20627	Dead	WITH TUMOR	#N/A	896	[Not Available]	Locoregional Recurrence	#N/A	#N/A	226	Complete Remission/Response	#N/A	#N/A	1	896	1	896
TCGA-75-6214	TCGA-75-6214-01A-41R-1949-07	3228.94	16.676	2.5875	0.4586	0	2081.62	244.303	135.006	450.305	11.2368	0	0	0.3037	3.037	0	0.9111	2.7333	0	1.5185	86.8575	TCGA-75-6214	LUAD	#N/A	FEMALE	[Not Available]	Stage IIIA	[Not Applicable]	Lung Adenocarcinoma	[Not Available]	#N/A	[Not Available]	#N/A	Dead	WITH TUMOR	#N/A	1115	[Not Available]	Distant Metastasis	#N/A	#N/A	419	Complete Remission/Response	#N/A	#N/A	1	1115	1	1115
TCGA-44-7672	TCGA-44-7672-01A-11R-2066-07	2.0187	0	0	0	0	39.0004	0	0	2.3272	10.9332	0	39.8282	3990.4	45.6853	128.075	141.742	23.0379	0	1.5619	214.369	TCGA-44-7672	LUAD	52	FEMALE	WHITE	Stage IA	[Not Applicable]	Lung Adenocarcinoma	[Not Available]	2010	[Not Available]	-19200	Alive	TUMOR FREE	719	#N/A	[Not Available]	#N/A	#N/A	#N/A	#N/A	Complete Remission/Response	#N/A	#N/A	0	719	0	719
TCGA-75-5147	TCGA-75-5147-01A-01R-1628-07	108.868	0	0	0	0	155.815	0	43.4061	32.8133	10.3214	1.1796	4.4235	13.4651	2359.78	2.6541	48.3633	62.2235	0.5898	71.3654	589.207	TCGA-75-5147	LUAD	#N/A	FEMALE	[Not Available]	Stage IB	[Not Applicable]	Lung Adenocarcinoma	[Not Available]	#N/A	[Not Available]	#N/A	Alive	TUMOR FREE	1333	#N/A	[Not Available]	#N/A	#N/A	#N/A	#N/A	Complete Remission/Response	#N/A	#N/A	0	1333	0	1333
TCGA-55-6985	TCGA-55-6985-01A-11R-1949-07	6.8955	0	0	0	0	53.2836	0	0	1.7612	9.7015	0	0.7463	0.7463	1.4925	0.7463	1.4925	26.8657	0	2.2388	188.06	TCGA-55-6985	LUAD	58	FEMALE	WHITE	Stage IB	[Not Applicable]	Lung Adenocarcinoma	[Not Available]	2004	[Not Available]	-21381	Alive	TUMOR FREE	1233	#N/A	[Not Available]	#N/A	#N/A	#N/A	#N/A	Complete Remission/Response	#N/A	#N/A	0	1233	0	1233
TCGA-J2-8194	TCGA-J2-8194-01A-11R-2241-07	0	47.8936	6.1622	0	2.7388	6023.64	0	0	172.071	9.5944	0	0	1.3083	0.4361	0.8722	7.4139	1.7444	0	0.8722	17.0083	TCGA-J2-8194	LUAD	69	FEMALE	WHITE	Stage IIB	[Not Applicable]	Lung Adenocarcinoma	[Not Available]	2011	[Not Available]	-25441	Alive	WITH TUMOR	724	#N/A	[Not Available]	Distant Metastasis	#N/A	#N/A	470	Progressive Disease	#N/A	#N/A	0	724	0	724
TCGA-49-AARE	TCGA-49-AARE-01A-11R-A41B-07	0	0	0	0	0	11.1698	0	0	2.9404	9.5585	0	0.4552	0.4552	1.3655	0	0.9103	1.8207	0	0.9103	4.0965	TCGA-49-AARE	LUAD	51	FEMALE	BLACK OR AFRICAN AMERICAN	Stage IA	[Not Applicable]	Lung Adenocarcinoma	[Not Available]	1999	[Not Available]	-18893	Dead	WITH TUMOR	#N/A	1229	[Not Available]	Locoregional Recurrence	#N/A	#N/A	388	Complete Remission/Response	#N/A	#N/A	1	1229	1	1229
TCGA-69-8253	TCGA-69-8253-01A-11R-2287-07	0	0	0	0	0	125.49	1.4028	2.5343	0	8.8571	0	0	0	0.5714	0	2.8571	1.1428	0	0.5714	24.2855	TCGA-69-8253	LUAD	59	FEMALE	BLACK OR AFRICAN AMERICAN	Stage IIA	[Not Applicable]	Lung Adenocarcinoma	[Not Available]	2012	[Not Available]	-21771	Alive	TUMOR FREE	426	#N/A	[Not Available]	#N/A	#N/A	#N/A	#N/A	Complete Remission/Response	#N/A	#N/A	0	426	0	426
TCGA-05-4430	TCGA-05-4430-01A-02R-1206-07	0.7879	1.1994	0	0	0	49.6587	0	0	2.5805	8.6124	0.319	0.319	0.319	2.2329	0	11.4833	3.5088	0.319	1.5949	145.774	TCGA-05-4430	LUAD	59	FEMALE	[Not Available]	Stage IB	[Not Applicable]	Lung Adenocarcinoma	[Not Available]	2008	[Not Available]	-21884	Alive	TUMOR FREE	761	#N/A	[Not Available]	#N/A	#N/A	#N/A	#N/A	[Not Applicable]	#N/A	#N/A	0	761	0	761
TCGA-05-5425	TCGA-05-5425-01A-02R-1628-07	2.2229	7.0362	0	0	0	151.374	0	0	13.5747	8.4842	33.371	2.8281	0.5656	37.3303	0.5656	466.629	90.4977	0	1.6968	130.656	TCGA-05-5425	LUAD	68	MALE	[Not Available]	Stage IIB	[Not Applicable]	Lung Adenocarcinoma	[Not Available]	2009	[Not Available]	-25020	Alive	WITH TUMOR	882	#N/A	[Not Available]	#N/A	#N/A	#N/A	486	[Not Applicable]	#N/A	#N/A	0	882	0	882
TCGA-44-5643	TCGA-44-5643-01A-01R-1628-07	57.6169	7.138	7.7183	5.0817	0.8563	1120.72	1.7239	44.4225	79.2225	8.4507	0	0	0	0.5634	0.5634	0	0	2.8169	3.3803	163.944	TCGA-44-5643	LUAD	53	MALE	BLACK OR AFRICAN AMERICAN	Stage IIIA	[Not Applicable]	Lung Adenocarcinoma	[Not Available]	2010	[Not Available]	-19426	Alive	TUMOR FREE	1013	#N/A	[Not Available]	#N/A	#N/A	#N/A	#N/A	[Not Available]	#N/A	#N/A	0	1013	0	1013
TCGA-86-7701	TCGA-86-7701-01A-11R-2170-07	2.8346	0	2.9189	0	0	2.6765	0	0	0	8.4299	0	1.0537	24.236	4.215	1.0537	1186.51	5.2687	473.13	47.4183	314.015	TCGA-86-7701	LUAD	66	MALE	WHITE	Stage IV	[Not Applicable]	Lung Adenocarcinoma	[Not Available]	2011	[Not Available]	-24209	Alive	WITH TUMOR	947	#N/A	[Not Available]	Distant Metastasis	#N/A	#N/A	424	Complete Remission/Response	#N/A	#N/A	0	947	0	947
TCGA-97-A4M7	TCGA-97-A4M7-01A-11R-A24X-07	244.083	4.0782	0	0	0	78.3111	0	65.4706	66.1624	8.165	0	5.5866	34.3189	1872.37	10.3137	1.2892	0.8595	0	3.0082	112.591	TCGA-97-A4M7	LUAD	74	MALE	WHITE	Stage IA	[Not Applicable]	Lung Adenocarcinoma	[Not Available]	2012	[Not Available]	-27062	Alive	TUMOR FREE	629	#N/A	[Not Available]	#N/A	#N/A	#N/A	#N/A	Complete Remission/Response	#N/A	#N/A	0	629	0	629
TCGA-55-7815	TCGA-55-7815-01A-11R-2170-07	8.988	0	0	0	0	12.0541	0	0	0	8.016	0	9.018	318.567	36.0721	45.0902	6353.71	4.008	34.0681	79.1583	230.461	TCGA-55-7815	LUAD	76	MALE	[Not Available]	Stage IB	[Not Applicable]	Lung Adenocarcinoma	[Not Available]	2011	[Not Available]	-28119	Alive	WITH TUMOR	773	#N/A	[Not Available]	Locoregional Recurrence	#N/A	#N/A	466	Complete Remission/Response	#N/A	#N/A	0	773	0	773
TCGA-NJ-A55R	TCGA-NJ-A55R-01A-11R-A262-07	115.884	30.7683	35.6196	34.1323	1.533	1524.04	0	0	61.1065	7.9294	0	0	9.5993	2.6431	0.2403	22.5867	0	76.4102	4.0848	214.573	TCGA-NJ-A55R	LUAD	67	MALE	WHITE	Stage IA	[Not Applicable]	Lung Adenocarcinoma	[Not Available]	2011	[Not Available]	-24738	Alive	TUMOR FREE	603	#N/A	[Not Available]	#N/A	#N/A	#N/A	#N/A	Stable Disease	#N/A	#N/A	0	603	0	603
TCGA-35-4122	TCGA-35-4122-01A-01R-1107-07	288.975	0	0	0	0	144.93	0	1.5226	7.2915	7.5377	6.0302	1.5075	0.5025	7.0352	1.005	18.593	168.342	0	2.5126	662.814	TCGA-35-4122	LUAD	69	MALE	WHITE	Stage IA	[Not Applicable]	Lung Adenocarcinoma	[Not Available]	2010	[Not Available]	-25491	Alive	TUMOR FREE	225	#N/A	[Not Available]	#N/A	#N/A	#N/A	#N/A	[Unknown]	#N/A	#N/A	0	225	0	225
TCGA-97-8552	TCGA-97-8552-01A-11R-2403-07	0	0	0	0	0	117.171	1.1585	1.1037	18.372	7.3171	0.6098	0	0	12.8049	0	4.878	0.6098	1.2195	6.7073	57.3171	TCGA-97-8552	LUAD	55	FEMALE	WHITE	Stage I	[Not Applicable]	Lung Adenocarcinoma	[Not Available]	2012	[Not Available]	-20331	Alive	TUMOR FREE	626	#N/A	[Not Available]	#N/A	#N/A	#N/A	#N/A	Complete Remission/Response	#N/A	#N/A	0	626	0	626
TCGA-49-AAR4	TCGA-49-AAR4-01A-12R-A41B-07	6.8285	0	0	0	0	61.6015	0	0	3.4489	6.9357	0	0	0	1.261	0	1.8916	1.8916	0.6305	3.1526	5.0441	TCGA-49-AAR4	LUAD	51	MALE	BLACK OR AFRICAN AMERICAN	Stage IIIA	[Not Applicable]	Lung Adenocarcinoma	[Not Available]	2006	[Not Available]	-18939	Dead	WITH TUMOR	#N/A	879	[Not Available]	#N/A	#N/A	#N/A	#N/A	Stable Disease	#N/A	#N/A	1	879	1	879
TCGA-64-5778	TCGA-64-5778-01A-01R-1628-07	0	0	0	0	0	7.7842	0	0	0	6.7463	0	0.5189	0	3.6326	0	1.0379	0.5189	0.5189	4.6705	235.6	TCGA-64-5778	LUAD	60	MALE	WHITE	Stage IB	[Not Applicable]	Lung Adenocarcinoma	[Not Available]	2008	[Not Available]	-21927	Alive	WITH TUMOR	1305	#N/A	[Not Available]	Distant Metastasis	#N/A	#N/A	962	Complete Remission/Response	#N/A	#N/A	0	1305	0	1305
TCGA-4B-A93V	TCGA-4B-A93V-01A-11R-A39D-07	0	0	0	0	0	0	0	0	0	6.2543	0	0.4811	1.1258	19.244	0	1.9244	0.4811	0	0.9622	75.5328	TCGA-4B-A93V	LUAD	52	FEMALE	BLACK OR AFRICAN AMERICAN	Stage IA	[Not Applicable]	Lung Adenocarcinoma	[Not Available]	2013	[Not Available]	-19035	Dead	WITH TUMOR	#N/A	300	[Not Available]	Distant Metastasis	#N/A	#N/A	251	Progressive Disease	#N/A	#N/A	1	300	1	300
TCGA-55-A490	TCGA-55-A490-01A-11R-A466-07	0	0	0	0	0	0	0	0	0	5.9042	0	0	0	0	0	2.9521	0.984	4.4281	1.476	653.886	TCGA-55-A490	LUAD	78	MALE	WHITE	Stage IIA	[Not Applicable]	Lung Adenocarcinoma	[Not Available]	2012	[Not Available]	-28728	Dead	TUMOR FREE	#N/A	99	[Not Available]	#N/A	#N/A	#N/A	#N/A	[Not Applicable]	#N/A	#N/A	1	99	0	99
TCGA-78-8640	TCGA-78-8640-01A-11R-2403-07	1.7505	0	0	0	0	0	0	0	0	5.8352	0	0.5835	0	4.6681	0	3.5011	0.5835	1.7505	2.3341	9.3363	TCGA-78-8640	LUAD	59	MALE	[Not Evaluated]	Stage IIA	[Not Applicable]	Lung Adenocarcinoma	[Not Available]	1994	[Not Available]	-21832	Alive	TUMOR FREE	7062	#N/A	[Not Available]	#N/A	#N/A	#N/A	#N/A	Complete Remission/Response	#N/A	#N/A	0	7062	0	7062
TCGA-78-7159	TCGA-78-7159-01A-11R-2039-07	0	0	0	0	0	0.551	0	0	0	5.5096	0	0	0	1.1019	0	6.6116	0.551	8.2645	0	37.4656	TCGA-78-7159	LUAD	60	FEMALE	WHITE	Stage IA	[Not Applicable]	Lung Adenocarcinoma	[Not Available]	2008	[Not Available]	-22261	Alive	#N/A	1974	#N/A	[Not Available]	#N/A	#N/A	#N/A	#N/A	Complete Remission/Response	#N/A	#N/A	0	1974	0	1974
TCGA-44-2661	TCGA-44-2661-01A-01R-1107-07	0	0	0	0	0	51.3545	0.7157	0	0.7637	5.2834	0	0	1.4409	5.7637	0	7.2046	1.9212	0	0	84.5341	TCGA-44-2661	LUAD	69	FEMALE	WHITE	Stage IA	[Not Applicable]	Lung Adenocarcinoma	[Not Available]	2009	[Not Available]	-25313	Alive	TUMOR FREE	1159	#N/A	[Not Available]	#N/A	#N/A	#N/A	#N/A	Complete Remission/Response	#N/A	#N/A	0	1159	0	1159
TCGA-49-6742	TCGA-49-6742-01A-11R-1858-07	3.3855	37.6883	7.2036	0	0	10.6339	2.431	2.267	24.3848	5.22	1.4914	6.7114	0	123.043	0	5.22	80.5369	3.7286	2.9828	87.2483	TCGA-49-6742	LUAD	70	MALE	WHITE	Stage IIA	[Not Applicable]	Lung Adenocarcinoma	[Not Available]	2010	[Not Available]	-25839	Dead	WITH TUMOR	#N/A	488	[Not Available]	#N/A	#N/A	#N/A	214	Progressive Disease	#N/A	#N/A	1	488	1	488
TCGA-L9-A443	TCGA-L9-A443-01A-12R-A24H-07	2.1115	0	0	0	0	26.1912	0	0	4.2679	5.0541	0	0	0	0	0	16.2853	0	0	0	96.027	TCGA-L9-A443	LUAD	63	FEMALE	WHITE	Stage IA	[Not Applicable]	Lung Adenocarcinoma	[Not Available]	2012	[Not Available]	-23062	Dead	TUMOR FREE	#N/A	193	[Not Available]	#N/A	#N/A	#N/A	#N/A	Complete Remission/Response	#N/A	#N/A	1	193	0	193
TCGA-75-5146	TCGA-75-5146-01A-01R-1628-07	0	0	0	0	0	4.961	0	0	0	4.961	0	0	0	9.922	1.4174	8.5046	0	0	1.4174	92.1332	TCGA-75-5146	LUAD	#N/A	MALE	[Not Available]	Stage IB	[Not Applicable]	Lung Adenocarcinoma	[Not Available]	#N/A	[Not Available]	#N/A	Alive	TUMOR FREE	2368	#N/A	[Not Available]	New Primary Tumor	#N/A	#N/A	1773	Complete Remission/Response	#N/A	#N/A	0	2368	0	2368
TCGA-44-7670	TCGA-44-7670-01A-11R-2066-07	10.313	64.9262	14.1928	3.4871	4.5629	13575.7	0	0.4915	1392.09	4.9463	2.7823	4.9463	1.5457	3.4006	0	17.6211	6.492	0	1.5457	406.523	TCGA-44-7670	LUAD	47	FEMALE	WHITE	Stage IIA	[Not Applicable]	Lung Adenocarcinoma	[Not Available]	2010	[Not Available]	-17392	Alive	TUMOR FREE	882	#N/A	[Not Available]	#N/A	#N/A	#N/A	#N/A	Complete Remission/Response	#N/A	#N/A	0	882	0	882
TCGA-49-6743	TCGA-49-6743-01A-11R-1858-07	0	0	0	0	0	11.4596	0	0	4.8182	4.8833	0	0	0	1.0852	0	2.713	3.2556	0	0	246.338	TCGA-49-6743	LUAD	81	FEMALE	WHITE	Stage IIIA	[Not Applicable]	Lung Adenocarcinoma	[Not Available]	2010	[Not Available]	-29807	Alive	TUMOR FREE	1621	#N/A	[Not Available]	#N/A	#N/A	#N/A	#N/A	Complete Remission/Response	#N/A	#N/A	0	1621	0	1621
TCGA-55-1592	TCGA-55-1592-01A-01R-0946-07	0	0	0	0	0	55.0717	0	0	0.682	4.8717	0	0.2706	8.6256	96.8924	0.8119	2.9771	2.4358	0.8119	2.9771	137.49	TCGA-55-1592	LUAD	65	MALE	WHITE	Stage IA	[Not Applicable]	Lung Adenocarcinoma	[Not Available]	2005	[Not Available]	#N/A	Dead	WITH TUMOR	#N/A	701	[Not Available]	#N/A	#N/A	#N/A	452	Complete Remission/Response	#N/A	#N/A	1	701	1	701
TCGA-55-6969	TCGA-55-6969-01A-11R-1949-07	0	0	0	0	0	5.1742	0	0	0	4.8293	0	0	4.3878	5.1742	0.3449	33.1151	0.6899	782.69	129.701	306.66	TCGA-55-6969	LUAD	52	MALE	WHITE	Stage IB	[Not Applicable]	Lung Adenocarcinoma	[Not Available]	2004	[Not Available]	-19270	Alive	TUMOR FREE	1239	#N/A	[Not Available]	#N/A	#N/A	#N/A	#N/A	[Not Available]	#N/A	#N/A	0	1239	0	1239
TCGA-05-4382	TCGA-05-4382-01A-01R-1206-07	3.7547	0	0	0.4523	0	0.8615	1.1534	0	0	4.7861	0	2.6323	0.9572	30.8702	0	7.4184	11.008	0.2393	6.4612	58.3902	TCGA-05-4382	LUAD	68	MALE	[Not Available]	Stage IB	[Not Applicable]	Lung Adenocarcinoma	[Not Available]	2009	[Not Available]	-24868	Alive	TUMOR FREE	607	#N/A	[Not Available]	Distant Metastasis	#N/A	#N/A	334	Complete Remission/Response	#N/A	#N/A	0	607	0	607
TCGA-05-4424	TCGA-05-4424-01A-22R-1858-07	0	0	0	0	0	4.0753	1.3203	0	1.2774	4.7664	0	0	2.3832	480.458	0.4766	8.5796	2.3832	0.4766	45.7579	21.449	TCGA-05-4424	LUAD	70	MALE	[Not Available]	Stage IIB	[Not Applicable]	Lung Adenocarcinoma	[Not Available]	2008	[Not Available]	-25689	Alive	WITH TUMOR	913	#N/A	[Not Available]	Distant Metastasis	#N/A	#N/A	153	Progressive Disease	#N/A	#N/A	0	913	0	913
TCGA-05-4420	TCGA-05-4420-01A-01R-1206-07	0.7073	0	0	0	0	0.0815	0	0	0	4.7331	0	0	1.0518	0.7889	0.263	74.4149	2.8925	0	0.263	54.4307	TCGA-05-4420	LUAD	41	MALE	[Not Available]	Stage IB	[Not Applicable]	Lung Adenocarcinoma	[Not Available]	2008	[Not Available]	-15159	Alive	TUMOR FREE	912	#N/A	[Not Available]	#N/A	#N/A	#N/A	#N/A	Complete Remission/Response	#N/A	#N/A	0	912	0	912
TCGA-69-8254	TCGA-69-8254-01A-11R-2287-07	0	0	0	0	0	52.3654	0	1.2476	6.6761	4.6755	2.2147	0	0	103.353	0	3.199	10.3353	0	4.1833	452.784	TCGA-69-8254	LUAD	85	MALE	WHITE	[Not Available]	[Not Applicable]	Lung Adenocarcinoma	[Not Available]	2012	[Not Available]	-31134	Alive	TUMOR FREE	409	#N/A	[Not Available]	#N/A	#N/A	#N/A	#N/A	Complete Remission/Response	#N/A	#N/A	0	409	0	409
TCGA-05-5429	TCGA-05-5429-01A-01R-1628-07	6172.75	113.457	0	0	0	410.673	6.2336	102.15	434.493	4.6404	1508.12	2.3202	0	364.269	0	1.5468	165.507	0	3.0936	645.012	TCGA-05-5429	LUAD	60	MALE	[Not Available]	Stage IIIA	[Not Applicable]	Lung Adenocarcinoma	[Not Available]	2010	[Not Available]	-22066	Dead	TUMOR FREE	#N/A	275	[Not Available]	#N/A	#N/A	#N/A	#N/A	[Not Applicable]	#N/A	#N/A	1	275	0	275
TCGA-62-A471	TCGA-62-A471-01A-12R-A24H-07	190.286	7.954	3.4578	0	0	935.795	1.6266	7.555	46.6701	4.6036	0	0	2.5575	1.5345	0.5115	9.2072	10.2302	25.5754	0	12.2762	TCGA-62-A471	LUAD	64	MALE	WHITE	Stage IIB	[Not Applicable]	Lung Adenocarcinoma	[Not Available]	2010	[Not Available]	-23689	Alive	TUMOR FREE	1246	#N/A	[Not Available]	#N/A	#N/A	#N/A	#N/A	Complete Remission/Response	#N/A	#N/A	0	1246	0	1246
TCGA-86-6851	TCGA-86-6851-01A-11R-1949-07	1.0994	5.0983	0.8146	0	0	782.037	0	0	48.6044	4.5571	0	0	0	10.2535	0	1.1393	0.5696	0.8545	22.2159	174.024	TCGA-86-6851	LUAD	73	FEMALE	WHITE	Stage IIA	[Not Applicable]	Lung Adenocarcinoma	[Not Available]	2011	[Not Available]	-26808	Alive	TUMOR FREE	179	#N/A	[Not Available]	#N/A	#N/A	#N/A	#N/A	Complete Remission/Response	#N/A	#N/A	0	179	0	179
TCGA-73-A9RS	TCGA-73-A9RS-01A-11R-A41B-07	0	0.8803	0	0	0	0	0	0	0	4.4014	0	0	0	4.4014	0	0	0	0	0	1.7606	TCGA-73-A9RS	LUAD	41	MALE	BLACK OR AFRICAN AMERICAN	Stage IIB	[Not Applicable]	Lung Adenocarcinoma	[Not Available]	2013	[Not Available]	-15162	Dead	WITH TUMOR	#N/A	340	[Not Available]	Locoregional Recurrence	#N/A	#N/A	107	Progressive Disease	#N/A	#N/A	1	340	1	340
TCGA-MP-A4SV	TCGA-MP-A4SV-01A-11R-A24X-07	150.06	1.3125	0	0	0	28.0633	4.0274	1.2612	8.5207	3.8478	0	0	0.8551	9.8333	0.4275	2.5652	2.9927	0.4275	5.1304	493.373	TCGA-MP-A4SV	LUAD	67	MALE	[Unknown]	Stage IB	[Not Applicable]	Lung Adenocarcinoma	[Not Available]	2001	[Not Available]	-24516	Dead	#N/A	#N/A	2620	[Not Available]	#N/A	#N/A	#N/A	#N/A	Complete Remission/Response	#N/A	#N/A	1	2620	#N/A	2620
TCGA-69-7974	TCGA-69-7974-01A-11R-2187-07	0	4.5909	0	0	0	767.194	0	0	17.0793	3.8209	0	0	0	0.2939	0	1.1757	3.2331	0	1.4696	310.961	TCGA-69-7974	LUAD	54	FEMALE	WHITE	Stage IIIA	[Not Applicable]	Lung Adenocarcinoma	[Not Available]	2011	[Not Available]	-20021	Alive	WITH TUMOR	184	#N/A	[Not Available]	#N/A	#N/A	#N/A	#N/A	Progressive Disease	#N/A	#N/A	0	184	0	184
TCGA-78-7163	TCGA-78-7163-01A-12R-2066-07	0	0	0	0	0	2.585	0	0	3.9202	3.7662	1.7119	0.6848	0.3424	36.6344	1.3695	0	11.6408	0.6848	0.3424	248.224	TCGA-78-7163	LUAD	60	MALE	WHITE	Stage IB	[Not Applicable]	Lung Adenocarcinoma	[Not Available]	1992	[Not Available]	-22002	Alive	TUMOR FREE	7248	#N/A	[Not Available]	#N/A	#N/A	#N/A	#N/A	Complete Remission/Response	#N/A	#N/A	0	7248	0	7248
TCGA-J2-8192	TCGA-J2-8192-01A-11R-2241-07	24.9611	1.359	0	0	0	57.115	0	15.298	0	3.7541	0	1.1262	49.8958	28.1558	21.3984	4.1295	15.7672	0	2.2525	153.918	TCGA-J2-8192	LUAD	65	FEMALE	WHITE	Stage IIA	[Not Applicable]	Lung Adenocarcinoma	[Not Available]	2011	[Not Available]	-23892	Alive	TUMOR FREE	739	#N/A	[Not Available]	Locoregional Recurrence	#N/A	#N/A	482	Progressive Disease	#N/A	#N/A	0	739	0	739
TCGA-MP-A5C7	TCGA-MP-A5C7-01A-11R-A262-07	0	22.5459	0	0	0	1968.35	0	0	85.2495	3.7348	0	0	0	27.3887	0	21.579	0.83	1.2449	0.415	4.5648	TCGA-MP-A5C7	LUAD	76	FEMALE	WHITE	Stage IB	[Not Applicable]	Lung Adenocarcinoma	[Not Available]	2008	[Not Available]	-28015	Alive	TUMOR FREE	2248	#N/A	[Not Available]	#N/A	#N/A	#N/A	#N/A	Complete Remission/Response	#N/A	#N/A	0	2248	0	2248
TCGA-55-8513	TCGA-55-8513-01A-11R-2403-07	407.114	50.2596	0	0	0	321.721	0	5.8605	19.9407	3.7092	3.7092	1.4837	0	707.715	0.7418	9.6439	32.6409	0.7418	2.9674	389.466	TCGA-55-8513	LUAD	77	FEMALE	WHITE	Stage IIB	[Not Applicable]	Lung Adenocarcinoma	[Not Available]	2012	[Not Available]	-28284	Alive	WITH TUMOR	791	#N/A	[Not Available]	Distant Metastasis	#N/A	#N/A	317	Complete Remission/Response	#N/A	#N/A	0	791	0	791
TCGA-44-2662	TCGA-44-2662-01A-01R-0946-07	5.7456	0	0	0	0	1.4903	0	0.8654	0.8762	3.591	0	1.7955	0.7182	10.4139	0	1.7955	108.448	0	1.0773	18.314	TCGA-44-2662	LUAD	65	MALE	WHITE	Stage IB	[Not Applicable]	Lung Adenocarcinoma	[Not Available]	2009	[Not Available]	-24014	Alive	TUMOR FREE	1280	#N/A	[Not Available]	#N/A	#N/A	#N/A	245	Progressive Disease	#N/A	#N/A	0	1280	0	1280
TCGA-55-8092	TCGA-55-8092-01A-11R-2241-07	0	0	0	0	0	89.4618	0	1.2901	0	3.5589	0	0	0.8897	23.5777	0	2.6692	13.3459	0	20.4637	199.743	TCGA-55-8092	LUAD	75	MALE	WHITE	Stage IIB	[Not Applicable]	Lung Adenocarcinoma	[Not Available]	2012	[Not Available]	-27597	Dead	WITH TUMOR	#N/A	154	[Not Available]	Locoregional Recurrence	#N/A	#N/A	127	Complete Remission/Response	#N/A	#N/A	1	154	1	154
TCGA-93-8067	TCGA-93-8067-01A-11R-2287-07	0	493.009	105.45	6.107	1.8344	25199.9	0	0	747.581	3.4181	1.1394	15.3813	402.139	1270.95	90.0093	5467.78	1059.89	0	3.7029	51.2711	TCGA-93-8067	LUAD	77	MALE	ASIAN	Stage IB	[Not Applicable]	Lung Adenocarcinoma	[Not Available]	2011	[Not Available]	-28453	Alive	TUMOR FREE	186	#N/A	[Not Available]	#N/A	#N/A	#N/A	#N/A	Complete Remission/Response	#N/A	#N/A	0	186	0	186
TCGA-62-8399	TCGA-62-8399-01A-21R-2326-07	0	1.0325	0	0	1.0401	8.8956	0	0	0	3.4039	0	0	0	0	0	9.8336	0	0.3782	0.3782	179.652	TCGA-62-8399	LUAD	62	MALE	WHITE	Stage IIIA	[Not Applicable]	Lung Adenocarcinoma	[Not Available]	2006	[Not Available]	-22952	Alive	TUMOR FREE	2696	#N/A	[Not Available]	#N/A	#N/A	#N/A	#N/A	Complete Remission/Response	#N/A	#N/A	0	2696	0	2696
TCGA-L9-A7SV	TCGA-L9-A7SV-01A-11R-A39D-07	0	0	0	0	0	0.3772	0	0	0	3.3949	0	0	0	3.0177	0.3772	1.8861	0	58.8457	14.3342	293.474	TCGA-L9-A7SV	LUAD	69	MALE	BLACK OR AFRICAN AMERICAN	Stage IIA	[Not Applicable]	Lung Adenocarcinoma	[Not Available]	2013	[Not Available]	-25298	Alive	TUMOR FREE	565	#N/A	[Not Available]	#N/A	#N/A	#N/A	#N/A	Complete Remission/Response	#N/A	#N/A	0	565	0	565
TCGA-83-5908	TCGA-83-5908-01A-21R-2287-07	1.288	0	0	0	0	9.294	0	0	1.81	3.3796	0.3755	0.3755	0	0	0	4.1307	1.8776	0	1.5021	759.294	TCGA-83-5908	LUAD	59	FEMALE	WHITE	Stage IA	[Not Applicable]	Lung Adenocarcinoma	[Not Available]	2009	[Not Available]	-21760	Alive	TUMOR FREE	824	#N/A	[Not Available]	#N/A	#N/A	#N/A	#N/A	Stable Disease	#N/A	#N/A	0	824	0	824
TCGA-MN-A4N4	TCGA-MN-A4N4-01A-12R-A24X-07	3.6275	0.9177	0	0	0	0	1.9219	1.8017	3.7428	3.3633	0	2.4023	0	2.4023	0	9.6093	2.8828	0	0.4805	7.207	TCGA-MN-A4N4	LUAD	57	MALE	WHITE	Stage IA	[Not Applicable]	Lung Adenocarcinoma	[Not Available]	2010	[Not Available]	-20888	Alive	TUMOR FREE	1175	#N/A	[Not Available]	#N/A	#N/A	#N/A	#N/A	Complete Remission/Response	#N/A	#N/A	0	1175	0	1175
TCGA-62-A46O	TCGA-62-A46O-01A-11R-A24H-07	12.5195	0	0	0	0	6.3935	0	2.291	1.0925	3.3445	0	0	1.1148	0	0	82.4972	5.5741	0	0.5574	43.4783	TCGA-62-A46O	LUAD	65	FEMALE	WHITE	Stage IB	[Not Applicable]	Lung Adenocarcinoma	[Not Available]	2006	[Not Available]	-24050	Dead	WITH TUMOR	#N/A	1454	[Not Available]	Locoregional Recurrence|Distant Metastasis	#N/A	#N/A	943	Complete Remission/Response	#N/A	#N/A	1	1454	1	1454
TCGA-L4-A4E6	TCGA-L4-A4E6-01A-11R-A24H-07	1.5796	2.3138	0	0	0	0	0	0	0	3.3372	0	0	0	0.5562	0.5562	17.242	8.3429	0	0	38.9334	TCGA-L4-A4E6	LUAD	67	MALE	WHITE	Stage IA	[Not Applicable]	Lung Adenocarcinoma	[Not Available]	2012	[Not Available]	-24631	Alive	TUMOR FREE	435	#N/A	[Not Available]	#N/A	#N/A	#N/A	#N/A	Complete Remission/Response	#N/A	#N/A	0	435	0	435
TCGA-55-6642	TCGA-55-6642-01A-11R-1858-07	0	0.6946	0	0	0	3.8925	0	0	0	3.2765	0	0	0	7.8637	0.6553	10.4849	0	289.646	7.2084	9.8296	TCGA-55-6642	LUAD	63	MALE	WHITE	Stage IB	[Not Applicable]	Lung Adenocarcinoma	[Not Available]	2006	[Not Available]	-23107	Alive	TUMOR FREE	2449	#N/A	[Not Available]	#N/A	#N/A	#N/A	#N/A	Complete Remission/Response	#N/A	#N/A	0	2449	0	2449
TCGA-95-7562	TCGA-95-7562-01A-11R-2241-07	7.8636	0	0	0	0	61.2567	0	0	0	3.1418	0.8977	0	4.0395	4.9372	3.1418	0.4488	9.4255	0	0	417.415	TCGA-95-7562	LUAD	71	MALE	BLACK OR AFRICAN AMERICAN	Stage IIA	[Not Applicable]	Lung Adenocarcinoma	[Not Available]	2011	[Not Available]	-26000	Dead	TUMOR FREE	#N/A	87	[Not Available]	#N/A	#N/A	#N/A	#N/A	[Not Evaluated]	#N/A	#N/A	1	87	0	87
TCGA-99-8025	TCGA-99-8025-01A-11R-2241-07	46.6078	0	0	0	0	166.018	0	5.7614	19.5368	2.999	0	0	0	2.3326	0	0	0.3332	0	2.3326	91.9693	TCGA-99-8025	LUAD	72	FEMALE	BLACK OR AFRICAN AMERICAN	Stage IIIA	[Not Applicable]	Lung Adenocarcinoma	[Not Available]	2010	[Not Available]	-26634	Alive	TUMOR FREE	1060	#N/A	[Not Available]	#N/A	#N/A	#N/A	#N/A	Complete Remission/Response	#N/A	#N/A	0	1060	0	1060
TCGA-86-7953	TCGA-86-7953-01A-11R-2187-07	5.1732	0	0	0	0	1.6781	0.9011	0	3.4744	2.9544	0	0	0	0	0.2954	5.318	3.8408	0.5909	1.1818	521.752	TCGA-86-7953	LUAD	69	FEMALE	WHITE	Stage IA	[Not Applicable]	Lung Adenocarcinoma	[Not Available]	2011	[Not Available]	-25315	Alive	TUMOR FREE	997	#N/A	[Not Available]	#N/A	#N/A	#N/A	#N/A	Complete Remission/Response	#N/A	#N/A	0	997	0	997
TCGA-55-A48X	TCGA-55-A48X-01A-11R-A24H-07	0	0	0	0	0	35.6794	0	0	0	2.9326	0	0.4888	0	0.4888	0	0.9775	3.9101	0	8.7977	110.948	TCGA-55-A48X	LUAD	63	FEMALE	WHITE	Stage IIA	[Not Applicable]	Lung Adenocarcinoma	[Not Available]	2012	[Not Available]	-23341	Alive	TUMOR FREE	689	#N/A	[Not Available]	New Primary Tumor	#N/A	#N/A	615	Complete Remission/Response	#N/A	#N/A	0	689	0	689
TCGA-MP-A4T4	TCGA-MP-A4T4-01A-11R-A262-07	0	0	0	0	0	30.4592	0	0	8.6902	2.9	0	0	0	1.45	0	0	14.9831	0	1.45	184.147	TCGA-MP-A4T4	LUAD	68	FEMALE	WHITE	Stage IIB	[Not Applicable]	Lung Adenocarcinoma	[Not Available]	2004	[Not Available]	-25052	Dead	#N/A	#N/A	2617	[Not Available]	#N/A	#N/A	#N/A	#N/A	Complete Remission/Response	#N/A	#N/A	1	2617	#N/A	2617
TCGA-78-7150	TCGA-78-7150-01A-21R-2039-07	7.774	24.0734	0	0	1.6064	769.696	1.6236	0	16.2249	2.8686	4.5898	0	0	12.6219	0	68.8468	17.2117	0	13.1956	2.8686	TCGA-78-7150	LUAD	59	MALE	WHITE	Stage IIB	[Not Applicable]	Lung Adenocarcinoma	[Not Available]	2002	[Not Available]	-21891	Dead	WITH TUMOR	#N/A	666	[Not Available]	#N/A	#N/A	#N/A	139	[Not Available]	#N/A	#N/A	1	666	1	666
TCGA-55-5899	TCGA-55-5899-01A-11R-1628-07	0	207.475	64.4206	2.9604	1.0059	20065.8	0	0	1760.31	2.8576	1.143	0.5715	0	176.597	0	1472.78	25.1464	1.143	0.5715	928.133	TCGA-55-5899	LUAD	58	MALE	WHITE	[Discrepancy]	[Not Applicable]	Lung Adenocarcinoma	[Not Available]	2010	[Not Available]	#N/A	Alive	TUMOR FREE	930	#N/A	[Not Available]	#N/A	#N/A	#N/A	#N/A	Complete Remission/Response	#N/A	#N/A	0	930	0	930
TCGA-44-A479	TCGA-44-A479-01A-31R-A24H-07	173.967	3.5982	1.8218	0	0	29.1373	3.7003	1.7423	0	2.8377	0.5675	0	0.5675	6.2429	0	14.1884	1.1351	3629.4	284.336	37.4574	TCGA-44-A479	LUAD	73	FEMALE	BLACK OR AFRICAN AMERICAN	Stage IB	[Not Applicable]	Lung Adenocarcinoma	[Not Available]	2012	[Not Available]	-27024	Alive	TUMOR FREE	486	#N/A	[Not Available]	New Primary Tumor	#N/A	#N/A	437	Complete Remission/Response	#N/A	#N/A	0	486	0	486
TCGA-50-5068	TCGA-50-5068-01A-01R-1628-07	0	0	0	0	0	29.2008	0	0	10.1326	2.5652	0	0	0	5.9855	0	0	0.8551	0	1.7102	75.2466	TCGA-50-5068	LUAD	59	FEMALE	WHITE	Stage IIB	[Not Applicable]	Lung Adenocarcinoma	[Not Available]	2003	[Not Available]	-21728	Dead	WITH TUMOR	1499	1499	[Not Available]	Distant Metastasis	#N/A	#N/A	686	Progressive Disease	#N/A	#N/A	1	1499	1	1499
TCGA-50-5942	TCGA-50-5942-01A-21R-1755-07	0	0	0	0	0	11.5076	0	0	0	2.5572	0	0	0	7.0324	0	10.229	0	0	3.1966	480.762	TCGA-50-5942	LUAD	67	FEMALE	WHITE	Stage IA	[Not Applicable]	Lung Adenocarcinoma	[Not Available]	2009	[Not Available]	-24781	Alive	WITH TUMOR	1847	#N/A	[Not Available]	Locoregional Recurrence	#N/A	#N/A	1378	Stable Disease	#N/A	#N/A	0	1847	0	1847
TCGA-86-8280	TCGA-86-8280-01A-11R-2287-07	0	0	0	0	0	28.7168	0	0	0	2.5445	1.0905	1.454	38.5314	11.6321	7.9971	10.1781	1.454	0.3635	17.4482	74.8819	TCGA-86-8280	LUAD	54	FEMALE	WHITE	Stage IIA	[Not Applicable]	Lung Adenocarcinoma	[Not Available]	2011	[Not Available]	-19977	Alive	TUMOR FREE	701	#N/A	[Not Available]	#N/A	#N/A	#N/A	#N/A	Complete Remission/Response	#N/A	#N/A	0	701	0	701
TCGA-44-7671	TCGA-44-7671-01A-11R-2066-07	0	0.8381	4.4017	0	0.4884	1628.07	0	0	48.7499	2.5207	0	0	80.5514	44.742	11.6581	686.885	7.2469	0	2.2056	52.6191	TCGA-44-7671	LUAD	64	MALE	BLACK OR AFRICAN AMERICAN	Stage IB	[Not Applicable]	Lung Adenocarcinoma	[Not Available]	2010	[Not Available]	-23538	Alive	WITH TUMOR	889	#N/A	[Not Available]	Locoregional Recurrence	#N/A	#N/A	883	Complete Remission/Response	#N/A	#N/A	0	889	0	889
TCGA-97-A4M5	TCGA-97-A4M5-01A-11R-A24X-07	0	7.3702	1.474	0.7119	0	87.9146	0	0	1.7797	2.5126	0	2.0938	1.2563	207.286	0.4188	52.3451	363.484	0	0	19.6817	TCGA-97-A4M5	LUAD	83	MALE	WHITE	Stage IA	[Not Applicable]	Lung Adenocarcinoma	[Not Available]	2012	[Not Available]	-30665	Alive	TUMOR FREE	634	#N/A	[Not Available]	#N/A	#N/A	#N/A	#N/A	Complete Remission/Response	#N/A	#N/A	0	634	0	634
TCGA-64-5779	TCGA-64-5779-01A-01R-1628-07	0	3.2733	0	0	0	0	0	0	0	2.455	0	0	0.8183	7.365	0	7.365	0.8183	503.273	130.115	348.609	TCGA-64-5779	LUAD	61	MALE	WHITE	Stage IIIA	[Not Applicable]	Lung Adenocarcinoma	[Not Available]	2009	[Not Available]	-22305	Alive	TUMOR FREE	864	#N/A	[Not Available]	Distant Metastasis	#N/A	#N/A	795	Stable Disease	#N/A	#N/A	0	864	0	864
TCGA-49-AAQV	TCGA-49-AAQV-01A-11R-A39D-07	2.9096	0	0	0	0	30.4017	0	0	0.1476	2.2962	0	2.2962	0.6561	10.1689	0	0.6561	2.2962	1.9682	8.2007	205.346	TCGA-49-AAQV	LUAD	63	FEMALE	BLACK OR AFRICAN AMERICAN	Stage II	[Not Applicable]	Lung Adenocarcinoma	[Not Available]	2012	[Not Available]	-23370	Dead	TUMOR FREE	#N/A	677	[Not Available]	Distant Metastasis	#N/A	#N/A	509	Complete Remission/Response	#N/A	#N/A	1	677	0	677
TCGA-55-7913	TCGA-55-7913-01B-11R-2241-07	0.9326	0	0	0	0	1.8194	0	2.7491	2.8237	2.2957	0	0	0	0.8609	0	23.5311	3.4436	4.0175	1.1479	107.038	TCGA-55-7913	LUAD	61	FEMALE	BLACK OR AFRICAN AMERICAN	Stage IA	[Not Applicable]	Lung Adenocarcinoma	[Not Available]	2011	[Not Available]	-22326	Dead	WITH TUMOR	#N/A	561	[Not Available]	Distant Metastasis	#N/A	#N/A	480	Complete Remission/Response	#N/A	#N/A	1	561	1	561
TCGA-55-8091	TCGA-55-8091-01A-11R-2241-07	0	0.9603	0.6715	0.6602	0	400.649	0	0	22.0801	2.2508	0	0.3751	0.3751	111.413	0	0.7503	9.7534	0	5.2518	58.5201	TCGA-55-8091	LUAD	74	MALE	WHITE	Stage IB	[Not Applicable]	Lung Adenocarcinoma	[Not Available]	2011	[Not Available]	-27385	Alive	TUMOR FREE	600	#N/A	[Not Available]	#N/A	#N/A	#N/A	#N/A	Complete Remission/Response	#N/A	#N/A	0	600	0	600
TCGA-50-6673	TCGA-50-6673-01A-11R-1949-07	1353.27	36.5564	27.3472	1.5648	5.3393	979.108	11.3909	3168.27	275.816	2.2434	0	3.3651	8.4128	17.9473	1.6826	13.4605	1.6826	0.5609	2.2434	281.548	TCGA-50-6673	LUAD	84	FEMALE	WHITE	Stage I	[Not Applicable]	Lung Adenocarcinoma	[Not Available]	2004	[Not Available]	-30689	Dead	#N/A	#N/A	22	[Not Available]	#N/A	#N/A	#N/A	#N/A	[Unknown]	#N/A	#N/A	1	22	#N/A	22
TCGA-86-8585	TCGA-86-8585-01A-11R-2403-07	0	0	0	0	0	6.6169	0	0	0	2.2056	0	1.1028	0	1.1028	0	8.8225	2.2056	0	1.1028	6.6169	TCGA-86-8585	LUAD	57	MALE	WHITE	Stage IB	[Not Applicable]	Lung Adenocarcinoma	[Not Available]	2012	[Not Available]	-20918	Alive	TUMOR FREE	353	#N/A	[Not Available]	#N/A	#N/A	#N/A	#N/A	Complete Remission/Response	#N/A	#N/A	0	353	0	353
TCGA-64-1677	TCGA-64-1677-01A-01R-0946-07	0	0	0	0	0	5.4705	0	0	0	2.1882	0	1.0941	6.5646	10.9409	0	20.7877	13.1291	0	3.2823	98.4683	TCGA-64-1677	LUAD	77	FEMALE	WHITE	Stage IIIA	[Not Applicable]	Lung Adenocarcinoma	[Not Available]	2005	[Not Available]	-28482	Dead	#N/A	#N/A	628	[Not Available]	#N/A	#N/A	#N/A	360	[Not Available]	#N/A	#N/A	1	628	#N/A	628
TCGA-55-8615	TCGA-55-8615-01A-11R-2403-07	0	0	0	0	0	1.6043	0	0	0	2.139	0	5.3476	766.588	14.4385	18.1818	4024.06	104.278	3693.58	85.5615	10.1604	TCGA-55-8615	LUAD	67	MALE	WHITE	Stage IIIA	[Not Applicable]	Lung Adenocarcinoma	[Not Available]	2012	[Not Available]	-24786	Alive	WITH TUMOR	446	#N/A	[Not Available]	Distant Metastasis	#N/A	#N/A	224	Complete Remission/Response	#N/A	#N/A	0	446	0	446
TCGA-55-8208	TCGA-55-8208-01A-11R-2241-07	1.4956	30.3352	6.1475	0	1.5369	2397.06	34.9923	4.425	271.3	2.0629	0	1.0315	0	4.6416	0.5157	2.5786	11.8618	0	3.0944	50.0258	TCGA-55-8208	LUAD	73	FEMALE	WHITE	Stage IA	[Not Applicable]	Lung Adenocarcinoma	[Not Available]	2012	[Not Available]	-26716	Alive	WITH TUMOR	674	#N/A	[Not Available]	Distant Metastasis	#N/A	#N/A	511	Complete Remission/Response	#N/A	#N/A	0	674	0	674
TCGA-62-8402	TCGA-62-8402-01A-11R-2326-07	0	0	0	0	0	0	2.0052	2.9215	0	1.9707	0	1.9707	30.053	6.8974	0.9853	76.3641	25.1262	0.4927	291.169	469.023	TCGA-62-8402	LUAD	73	FEMALE	WHITE	Stage IIIA	[Not Applicable]	Lung Adenocarcinoma	[Not Available]	2008	[Not Available]	-26934	Dead	WITH TUMOR	#N/A	1498	[Not Available]	Distant Metastasis	#N/A	#N/A	772	Complete Remission/Response	#N/A	#N/A	1	1498	1	1498
TCGA-55-A493	TCGA-55-A493-01A-11R-A24H-07	0	0	0.6981	0	0	2.3802	0	0	0.795	1.9391	0	0	0.4848	1.9391	0	0.4848	0.9695	0	0.9695	278.255	TCGA-55-A493	LUAD	54	FEMALE	WHITE	Stage IB	[Not Applicable]	Lung Adenocarcinoma	[Not Available]	2012	[Not Available]	-20027	Alive	TUMOR FREE	28	#N/A	[Not Available]	#N/A	#N/A	#N/A	#N/A	[Unknown]	#N/A	#N/A	0	28	0	28
TCGA-50-8460	TCGA-50-8460-01A-11R-2326-07	1.7224	0	0	0	0	35.4523	0	0	0	1.8587	0	0	0.6196	2.4783	0	3.0979	0	0	3.0979	120.198	TCGA-50-8460	LUAD	74	MALE	WHITE	Stage IA	[Not Applicable]	Lung Adenocarcinoma	[Not Available]	2012	[Not Available]	-27270	Alive	TUMOR FREE	829	#N/A	[Not Available]	#N/A	#N/A	#N/A	#N/A	Complete Remission/Response	#N/A	#N/A	0	829	0	829
TCGA-91-A4BD	TCGA-91-A4BD-01A-11R-A24H-07	0	0	0	0	0	6.0403	0	0	22.8901	1.7534	0.8767	0	0	0.8767	0	1.7534	1.7534	0	3.5067	15.7802	TCGA-91-A4BD	LUAD	78	MALE	WHITE	Stage IIA	[Not Applicable]	Lung Adenocarcinoma	[Not Available]	2012	[Not Available]	-28544	Alive	TUMOR FREE	603	#N/A	[Not Available]	#N/A	#N/A	#N/A	#N/A	Complete Remission/Response	#N/A	#N/A	0	603	0	603
TCGA-86-8055	TCGA-86-8055-01A-11R-2241-07	53.7934	5.3493	2.6018	0	0.6515	2646.71	0	64.3506	164.389	1.7145	0.8573	2.5718	2.1432	85.7265	0.8573	3.0004	15.0021	0	0.8573	171.882	TCGA-86-8055	LUAD	79	MALE	WHITE	Stage IIA	[Not Applicable]	Lung Adenocarcinoma	[Not Available]	2011	[Not Available]	-29124	Dead	TUMOR FREE	#N/A	124	[Not Available]	#N/A	#N/A	#N/A	#N/A	Complete Remission/Response	#N/A	#N/A	1	124	0	124
TCGA-50-5045	TCGA-50-5045-01A-01R-1628-07	4.835	0	0	0	0	28.3883	0	1.1929	7.8849	1.692	3.8071	0	21.1379	10.1523	2.5381	4.6531	3.8071	0.846	5.9222	23.6887	TCGA-50-5045	LUAD	57	FEMALE	BLACK OR AFRICAN AMERICAN	[Discrepancy]	[Not Applicable]	Lung Adenocarcinoma	[Not Available]	2004	[Not Available]	-20961	Dead	WITH TUMOR	#N/A	2174	[Not Available]	Locoregional Recurrence	#N/A	#N/A	1433	Progressive Disease	#N/A	#N/A	1	2174	1	2174
TCGA-86-7713	TCGA-86-7713-01A-11R-2066-07	1.5319	0.517	0	0	0.3295	0.4882	0	0.3247	0.6541	1.6834	0	0.2405	0.481	0.2405	0.2405	6.2526	1.9239	0.2405	0.9619	43.5279	TCGA-86-7713	LUAD	70	MALE	WHITE	Stage IIA	[Not Applicable]	Lung Adenocarcinoma	[Not Available]	2011	[Not Available]	-25791	Alive	TUMOR FREE	1157	#N/A	[Not Available]	#N/A	#N/A	#N/A	#N/A	Complete Remission/Response	#N/A	#N/A	0	1157	0	1157
TCGA-44-7660	TCGA-44-7660-01A-11R-2066-07	1873.15	43.8608	14.9974	9.1473	5.3874	4423.16	5.4547	23.0302	577.735	1.6823	0.8411	0.4206	6.6113	0	14.7198	2.5234	26.0751	8.8319	13.4581	401.64	TCGA-44-7660	LUAD	72	MALE	WHITE	Stage IB	[Not Applicable]	Lung Adenocarcinoma	[Not Available]	2011	[Not Available]	-26594	Alive	WITH TUMOR	592	#N/A	[Not Available]	Locoregional Recurrence	#N/A	#N/A	253	Progressive Disease	#N/A	#N/A	0	592	0	592
TCGA-55-6975	TCGA-55-6975-01A-11R-1949-07	0	0	0	0	0	7.544	1.6764	0	0	1.6764	0	1.6764	0	10.0587	0.8382	9.2205	2.5147	0	0	1.6764	TCGA-55-6975	LUAD	61	MALE	WHITE	Stage IIB	[Not Applicable]	Lung Adenocarcinoma	[Not Available]	2004	[Not Available]	#N/A	Dead	WITH TUMOR	#N/A	118	[Not Available]	#N/A	#N/A	#N/A	#N/A	Progressive Disease	#N/A	#N/A	1	118	1	118
TCGA-55-A491	TCGA-55-A491-01A-11R-A24H-07	0	0	0	0	0	11.6464	0	0	0	1.5881	0	0	0	7.4113	0	2.6469	2.1175	0.5294	20.1165	304.923	TCGA-55-A491	LUAD	81	FEMALE	WHITE	Stage IA	[Not Applicable]	Lung Adenocarcinoma	[Not Available]	2012	[Not Available]	-29593	Alive	TUMOR FREE	626	#N/A	[Not Available]	#N/A	#N/A	#N/A	#N/A	Complete Remission/Response	#N/A	#N/A	0	626	0	626
TCGA-95-A4VP	TCGA-95-A4VP-01A-21R-A262-07	0	0.5242	0	0	0	3.1451	0	0	0	1.5725	0	0	17.2979	3.1451	2.0967	356.965	3.1451	29.8781	9.4352	19.3946	TCGA-95-A4VP	LUAD	66	FEMALE	WHITE	Stage IIIA	[Not Applicable]	Lung Adenocarcinoma	[Not Available]	2012	[Not Available]	-24130	Alive	WITH TUMOR	605	#N/A	[Not Available]	Distant Metastasis	#N/A	#N/A	216	Stable Disease	#N/A	#N/A	0	605	0	605
TCGA-75-5125	TCGA-75-5125-01A-01R-1755-07	0	0	0	0	0	5.1546	0	0	0	1.5464	0	0	0	0	0	0.5155	1.0309	0	4.6392	208.763	TCGA-75-5125	LUAD	#N/A	MALE	[Not Available]	Stage IIB	[Not Applicable]	Lung Adenocarcinoma	[Not Available]	#N/A	[Not Available]	#N/A	Dead	WITH TUMOR	#N/A	2027	[Not Available]	#N/A	#N/A	#N/A	1752	Complete Remission/Response	#N/A	#N/A	1	2027	1	2027
TCGA-91-6831	TCGA-91-6831-01A-11R-1858-07	0	0	0	0	0	0.7718	0	0	0	1.5435	0	0	0	2.3153	0	8.4893	0	176.732	19.2938	285.549	TCGA-91-6831	LUAD	66	MALE	WHITE	Stage IB	[Not Applicable]	Lung Adenocarcinoma	[Not Available]	2001	[Not Available]	-24436	Alive	TUMOR FREE	310	#N/A	[Not Available]	#N/A	#N/A	#N/A	#N/A	Complete Remission/Response	#N/A	#N/A	0	310	0	310
TCGA-49-6745	TCGA-49-6745-01A-11R-1858-07	0	0	0	0	0	12.285	0	0	0	1.4742	0	0	0	0.4914	0	0	0.9828	0	0.9828	888.943	TCGA-49-6745	LUAD	82	MALE	WHITE	Stage IIIA	[Not Applicable]	Lung Adenocarcinoma	[Not Available]	2011	[Not Available]	-30133	Alive	TUMOR FREE	522	#N/A	[Not Available]	#N/A	#N/A	#N/A	#N/A	[Not Available]	#N/A	#N/A	0	522	0	522
TCGA-05-4432	TCGA-05-4432-01A-01R-1206-07	1.5662	0	4.0265	0.7845	0	13.5247	0	0	0	1.4422	0	1.4422	11.7739	25.0937	1.1537	60.2827	2.019	203.923	30.2855	88.5492	TCGA-05-4432	LUAD	66	MALE	[Not Available]	Stage IIB	[Not Applicable]	Lung Adenocarcinoma	[Not Available]	2008	[Not Available]	-24350	Alive	TUMOR FREE	761	#N/A	[Not Available]	#N/A	#N/A	#N/A	#N/A	Complete Remission/Response	#N/A	#N/A	0	761	0	761
TCGA-86-8074	TCGA-86-8074-01A-11R-2241-07	0	4.6748	1.7262	0	0.5754	1950.67	0.579	0	73.5811	1.4296	0.3574	0	0.7148	4.2888	0	0	3.574	0	2.1444	317.727	TCGA-86-8074	LUAD	62	FEMALE	WHITE	Stage IIA	[Not Applicable]	Lung Adenocarcinoma	[Not Available]	2011	[Not Available]	-22862	Alive	TUMOR FREE	24	#N/A	[Not Available]	#N/A	#N/A	#N/A	#N/A	[Not Available]	#N/A	#N/A	0	24	0	24
TCGA-55-A57B	TCGA-55-A57B-01A-12R-A39D-07	3.2299	0	0	0	0	9.8343	1.9922	6.6573	2.9725	1.4104	0.3526	6.347	0.3526	37.3766	0.3526	5.9944	2.8209	0	0	329.337	TCGA-55-A57B	LUAD	80	FEMALE	BLACK OR AFRICAN AMERICAN	Stage IA	[Not Applicable]	Lung Adenocarcinoma	[Not Available]	2012	[Not Available]	-29452	Alive	TUMOR FREE	546	#N/A	[Not Available]	#N/A	#N/A	#N/A	#N/A	Complete Remission/Response	#N/A	#N/A	0	546	0	546
TCGA-97-7552	TCGA-97-7552-01A-11R-2039-07	1635.55	275.537	13.3883	0	0	189.474	0	11.6491	91.2211	1.3951	240.888	0	0.9301	3602.15	0	0	21.3916	0	10.2307	783.582	TCGA-97-7552	LUAD	70	MALE	WHITE	Stage IB	[Not Applicable]	Lung Adenocarcinoma	[Not Available]	2007	[Not Available]	-25578	Alive	TUMOR FREE	1932	#N/A	[Not Available]	#N/A	#N/A	#N/A	798	Stable Disease	#N/A	#N/A	0	1932	0	1932
TCGA-L4-A4E5	TCGA-L4-A4E5-01A-11R-A24X-07	0	0	0	0	0	5.9158	0	0	0	1.3652	0	0	0	0.4551	0	10.4664	0.9101	0	0.4551	338.111	TCGA-L4-A4E5	LUAD	48	FEMALE	WHITE	Stage I	[Not Applicable]	Lung Adenocarcinoma	[Not Available]	2012	[Not Available]	-17680	Alive	TUMOR FREE	578	#N/A	[Not Available]	#N/A	#N/A	#N/A	#N/A	Complete Remission/Response	#N/A	#N/A	0	578	0	578
TCGA-05-4434	TCGA-05-4434-01A-01R-1206-07	0.5675	39.3262	8.3428	1.7861	0.3617	5637.58	0	0	324.922	1.3565	0.2261	0	0	190.821	0	1.1305	0	0	5.8784	68.7316	TCGA-05-4434	LUAD	67	FEMALE	[Not Available]	Stage IV	[Not Applicable]	Lung Adenocarcinoma	[Not Available]	2008	[Not Available]	-24472	Dead	#N/A	#N/A	457	[Not Available]	#N/A	#N/A	#N/A	#N/A	[Not Available]	#N/A	#N/A	1	457	#N/A	457
TCGA-97-7553	TCGA-97-7553-01A-21R-2039-07	0	0	0	0	0	106.746	0	0	4.8709	1.3394	0	0.4465	0	1.7859	0	16.5192	6.2505	0.8929	0.4465	41.9678	TCGA-97-7553	LUAD	58	FEMALE	WHITE	Stage IA	[Not Applicable]	Lung Adenocarcinoma	[Not Available]	2007	[Not Available]	-21518	Alive	TUMOR FREE	1870	#N/A	[Not Available]	#N/A	#N/A	#N/A	#N/A	Complete Remission/Response	#N/A	#N/A	0	1870	0	1870
TCGA-86-8054	TCGA-86-8054-01A-11R-2241-07	0	0	0	0	0	0.6661	0	0	0	1.3321	0	0.333	9.3115	0	1.6651	13.3211	2.3312	2226.29	5.6615	111.564	TCGA-86-8054	LUAD	61	MALE	WHITE	Stage IIB	[Not Applicable]	Lung Adenocarcinoma	[Not Available]	2011	[Not Available]	-22584	Alive	TUMOR FREE	1148	#N/A	[Not Available]	#N/A	#N/A	#N/A	#N/A	Complete Remission/Response	#N/A	#N/A	0	1148	0	1148
TCGA-91-8497	TCGA-91-8497-01A-11R-2403-07	5.1431	6.189	5.2888	0	0	17.3887	0	0	7.6915	1.3238	0	0.6619	48.2277	1.3238	2.6477	19.1958	1.3238	5.2954	6.6192	91.3454	TCGA-91-8497	LUAD	75	FEMALE	WHITE	Stage IA	[Not Applicable]	Lung Adenocarcinoma	[Not Available]	2012	[Not Available]	-27632	Dead	TUMOR FREE	#N/A	434	[Not Available]	#N/A	#N/A	#N/A	#N/A	Complete Remission/Response	#N/A	#N/A	1	434	0	434
TCGA-99-8028	TCGA-99-8028-01A-11R-2241-07	0	0	0	0	0	52.8421	0	0	2.7132	1.292	0	0	0	0.4307	0	2.1533	0.8613	0.4307	3.876	113.695	TCGA-99-8028	LUAD	50	FEMALE	BLACK OR AFRICAN AMERICAN	Stage IA	[Not Applicable]	Lung Adenocarcinoma	[Not Available]	2011	[Not Available]	-18542	Alive	TUMOR FREE	1118	#N/A	[Not Available]	#N/A	#N/A	#N/A	#N/A	Complete Remission/Response	#N/A	#N/A	0	1118	0	1118
TCGA-05-4390	TCGA-05-4390-01A-02R-1755-07	0	0	0	0	0	1.916	0	0	0	1.2773	0	0	69.5769	1.916	0	1144.5	50.4551	192.24	5.1094	883.283	TCGA-05-4390	LUAD	58	FEMALE	[Not Available]	Stage IB	[Not Applicable]	Lung Adenocarcinoma	[Not Available]	2005	[Not Available]	-21430	Alive	TUMOR FREE	1126	#N/A	[Not Available]	#N/A	#N/A	#N/A	395	Progressive Disease	#N/A	#N/A	0	1126	0	1126
TCGA-55-8614	TCGA-55-8614-01A-11R-2403-07	0	49.6118	6.2801	1.031	3.6901	4596.34	0	5.2994	277.561	1.2573	0	0	0	1.2573	0	0	0	8.1722	4.4004	33.9463	TCGA-55-8614	LUAD	76	MALE	WHITE	Stage IB	[Not Applicable]	Lung Adenocarcinoma	[Not Available]	2011	[Not Available]	-27924	Alive	TUMOR FREE	536	#N/A	[Not Available]	#N/A	#N/A	#N/A	#N/A	Complete Remission/Response	#N/A	#N/A	0	536	0	536
TCGA-73-4675	TCGA-73-4675-01A-01R-1206-07	0	13.7144	3.8879	3.2683	0.9882	12399.2	0	0	551.016	1.2392	0	0	0	1.5489	0	2.7881	0.9294	0	0.3098	4.9566	TCGA-73-4675	LUAD	59	MALE	WHITE	Stage IIIA	[Not Applicable]	Lung Adenocarcinoma	[Not Available]	2010	[Not Available]	-21614	Dead	TUMOR FREE	#N/A	922	[Not Available]	Locoregional Recurrence	#N/A	#N/A	361	Progressive Disease	#N/A	#N/A	1	922	0	922
TCGA-86-7955	TCGA-86-7955-01A-11R-2187-07	1.3103	0	0	0	0	0.6326	0	0	1.973	1.2049	0	0.6025	0.9037	20.4835	0	24.0982	33.4363	0	5.1209	36.7498	TCGA-86-7955	LUAD	62	MALE	WHITE	Stage IB	[Not Applicable]	Lung Adenocarcinoma	[Not Available]	2011	[Not Available]	-22772	Alive	TUMOR FREE	1072	#N/A	[Not Available]	Locoregional Recurrence	#N/A	#N/A	820	Complete Remission/Response	#N/A	#N/A	0	1072	0	1072
TCGA-50-6591	TCGA-50-6591-01A-11R-1755-07	0	0	0	0	0	0	0	0	0	1.1947	0	0	0	0	0	0	2.3895	8.3632	63.9188	165.472	TCGA-50-6591	LUAD	63	FEMALE	WHITE	Stage IV	[Not Applicable]	Lung Adenocarcinoma	[Not Available]	2007	[Not Available]	-23067	Dead	WITH TUMOR	#N/A	119	[Not Available]	#N/A	#N/A	#N/A	#N/A	Progressive Disease	#N/A	#N/A	1	119	1	119
TCGA-93-A4JP	TCGA-93-A4JP-01A-11R-A24X-07	0	0.4611	0	0	0	9.873	0	0	0	1.1924	0	0.7949	7.5518	35.3743	11.5264	18.2833	3.1797	0.3975	9.5391	8.3467	TCGA-93-A4JP	LUAD	64	MALE	ASIAN	Stage IV	[Not Applicable]	Lung Adenocarcinoma	[Not Available]	2012	[Not Available]	-23620	Alive	WITH TUMOR	578	#N/A	[Not Available]	Distant Metastasis	#N/A	#N/A	497	Partial Remission/Response	#N/A	#N/A	0	578	0	578
TCGA-97-8176	TCGA-97-8176-01A-11R-2403-07	0	5.0424	37.3302	0	1.6947	48.402	0	0	15.1568	1.1892	0	0	2.9731	22.0009	2.9731	751.003	9.5139	0	0	121.897	TCGA-97-8176	LUAD	63	MALE	WHITE	Stage IIIA	[Not Applicable]	Lung Adenocarcinoma	[Not Available]	2012	[Not Available]	-23170	Dead	TUMOR FREE	#N/A	468	[Not Available]	Distant Metastasis	#N/A	#N/A	39	Stable Disease	#N/A	#N/A	1	468	0	468
TCGA-55-1596	TCGA-55-1596-01A-01R-0946-07	0	0	0	0	0	9.1533	0	0	5.6483	1.1841	0	0.5921	0.5921	48.5494	0.5921	1927.77	6.5127	0	18.9461	1.7762	TCGA-55-1596	LUAD	55	MALE	ASIAN	Stage IIB	[Not Applicable]	Lung Adenocarcinoma	[Not Available]	2004	[Not Available]	-20381	Alive	TUMOR FREE	2065	#N/A	[Not Available]	#N/A	#N/A	#N/A	#N/A	Complete Remission/Response	#N/A	#N/A	0	2065	0	2065
TCGA-NJ-A55O	TCGA-NJ-A55O-01A-11R-A262-07	3.5414	47.0653	11.0093	0	0	6.8786	0	0	6.7678	1.1669	0	0	0	6.4177	0	1.7503	4.6674	0	0	140.607	TCGA-NJ-A55O	LUAD	56	FEMALE	WHITE	Stage IIA	[Not Applicable]	Lung Adenocarcinoma	[Not Available]	2011	[Not Available]	-20628	Alive	TUMOR FREE	13	#N/A	[Not Available]	#N/A	#N/A	#N/A	#N/A	Stable Disease	#N/A	#N/A	0	13	0	13
TCGA-69-7979	TCGA-69-7979-01A-11R-2187-07	0	21.644	4.7115	2.5689	1.5715	4876.12	0	0	381.296	1.1598	0	0	0	0.2899	0	1.7396	0	0	0.2899	71.9049	TCGA-69-7979	LUAD	71	FEMALE	WHITE	Stage IB	[Not Applicable]	Lung Adenocarcinoma	[Not Available]	2011	[Not Available]	-26180	Alive	#N/A	408	#N/A	[Not Available]	#N/A	#N/A	#N/A	#N/A	Stable Disease	#N/A	#N/A	0	408	0	408
TCGA-73-4677	TCGA-73-4677-01A-01R-1206-07	0	0	0.4973	0	0	70.9158	0	0	0	1.1565	0	0	0	4.3368	0.2891	5.4933	1.1565	0	0.2891	22.8406	TCGA-73-4677	LUAD	74	MALE	WHITE	[Discrepancy]	[Not Applicable]	Lung Adenocarcinoma	[Not Available]	2010	[Not Available]	-27381	Dead	WITH TUMOR	#N/A	38	[Not Available]	#N/A	#N/A	#N/A	#N/A	Stable Disease	#N/A	#N/A	1	38	1	38
TCGA-44-3918	TCGA-44-3918-01A-01R-1107-07	0	0	0	0	0	0.7361	0.7895	0	0	1.1442	0	1.1442	0.7628	9.9161	0.3814	4.5767	1.5256	0	2.6697	418.002	TCGA-44-3918	LUAD	60	FEMALE	WHITE	Stage IA	[Not Applicable]	Lung Adenocarcinoma	[Not Available]	2010	[Not Available]	-22236	Alive	WITH TUMOR	1036	#N/A	[Not Available]	#N/A	#N/A	#N/A	511	Complete Remission/Response	#N/A	#N/A	0	1036	0	1036
TCGA-55-8204	TCGA-55-8204-01A-11R-2241-07	3101.64	35.4131	4.6352	0	0.8637	1573.96	41.6899	82.5697	277.795	1.073	0	0	0	3.7554	0.5365	0	2.6824	0	10.7296	20.9227	TCGA-55-8204	LUAD	87	FEMALE	WHITE	Stage IB	[Not Applicable]	Lung Adenocarcinoma	[Not Available]	2011	[Not Available]	-31818	Alive	TUMOR FREE	515	#N/A	[Not Available]	#N/A	#N/A	#N/A	#N/A	Complete Remission/Response	#N/A	#N/A	0	515	0	515
TCGA-62-A46R	TCGA-62-A46R-01A-11R-A24H-07	0	1.7658	0	0	0	73.5969	0	0	2.6712	1.0004	0.5002	0	0	2.0009	0	2.0009	0.5002	0	1.0004	22.0095	TCGA-62-A46R	LUAD	54	FEMALE	WHITE	Stage IB	[Not Applicable]	Lung Adenocarcinoma	[Not Available]	2006	[Not Available]	-20063	Dead	TUMOR FREE	#N/A	1725	[Not Available]	#N/A	#N/A	#N/A	#N/A	Complete Remission/Response	#N/A	#N/A	1	1725	0	1725
TCGA-44-7667	TCGA-44-7667-01A-31R-2066-07	0	0.3329	0	0	0	1.9976	0	0	0	0.9988	0	0	0	0.6659	0.9988	10.654	0	496.078	3.6623	200.762	TCGA-44-7667	LUAD	49	FEMALE	WHITE	Stage IIB	[Not Applicable]	Lung Adenocarcinoma	[Not Available]	2009	[Not Available]	-18062	Alive	TUMOR FREE	1097	#N/A	[Not Available]	#N/A	#N/A	#N/A	#N/A	Complete Remission/Response	#N/A	#N/A	0	1097	0	1097
TCGA-05-4418	TCGA-05-4418-01A-01R-1206-07	0.8542	15.4549	3.3635	0	0	75.2771	0.8874	1.6851	0.8608	0.9971	13.9593	1.9942	11.779	6.9796	0.3324	1.9942	168.841	136.269	46.1986	7.9767	TCGA-05-4418	LUAD	69	MALE	[Not Available]	Stage IIIA	[Not Applicable]	Lung Adenocarcinoma	[Not Available]	2008	[Not Available]	-25417	Dead	#N/A	#N/A	274	[Not Available]	#N/A	#N/A	#N/A	#N/A	[Not Available]	#N/A	#N/A	1	274	#N/A	274
TCGA-78-7540	TCGA-78-7540-01A-11R-2066-07	2344.26	680.547	8.8517	0	0	1588.37	32.5269	35.6056	200.308	0.9942	235.625	1.657	6.628	6814.25	0.6628	0	87.821	0	0	657.829	TCGA-78-7540	LUAD	66	FEMALE	WHITE	Stage IB	[Not Applicable]	Lung Adenocarcinoma	[Not Available]	1999	[Not Available]	-24440	Dead	#N/A	#N/A	1197	[Not Available]	#N/A	#N/A	#N/A	#N/A	Complete Remission/Response	#N/A	#N/A	1	1197	#N/A	1197
TCGA-49-4510	TCGA-49-4510-01A-01R-1206-07	0	0	0	0	0	6.0664	0	0	0	0.9579	0	0	0.3193	7.6628	0.3193	13.7292	0.6386	0.3193	2.5543	2.5543	TCGA-49-4510	LUAD	51	FEMALE	BLACK OR AFRICAN AMERICAN	Stage IIB	[Not Applicable]	Lung Adenocarcinoma	[Not Available]	2001	[Not Available]	-18762	Dead	WITH TUMOR	#N/A	896	[Not Available]	Distant Metastasis	#N/A	#N/A	502	Stable Disease	#N/A	#N/A	1	896	1	896
TCGA-44-6774	TCGA-44-6774-01A-21R-1858-07	2.3141	0	0	0	0	3.2621	0	0	0	0.9294	0	0	28.6989	1.8587	0.9294	2.7881	0	53.9033	13.9405	159.851	TCGA-44-6774	LUAD	56	FEMALE	WHITE	Stage IIIA	[Not Applicable]	Lung Adenocarcinoma	[Not Available]	2011	[Not Available]	-20462	Alive	TUMOR FREE	658	#N/A	[Not Available]	#N/A	#N/A	#N/A	#N/A	Complete Remission/Response	#N/A	#N/A	0	658	0	658
TCGA-55-7910	TCGA-55-7910-01A-11R-2170-07	0	0	0	0	0	0	0	0	0	0.9259	0	0	0.9259	2.7778	0	13.8889	0	67.5926	2.7778	5.5556	TCGA-55-7910	LUAD	50	FEMALE	BLACK OR AFRICAN AMERICAN	Stage IIA	[Not Applicable]	Lung Adenocarcinoma	[Not Available]	2011	[Not Available]	-18289	Alive	WITH TUMOR	1040	#N/A	[Not Available]	#N/A	#N/A	#N/A	1018	Complete Remission/Response	#N/A	#N/A	0	1040	0	1040
TCGA-MP-A4TC	TCGA-MP-A4TC-01A-11R-A24X-07	0	0	0	0	0	3.1847	0	0	0	0.9099	0	1.8198	0	0	0	2.2748	0	0	0.9099	148.317	TCGA-MP-A4TC	LUAD	77	MALE	WHITE	Stage IIIA	[Not Applicable]	Lung Adenocarcinoma	[Not Available]	2008	[Not Available]	-28471	Dead	TUMOR FREE	#N/A	74	[Not Available]	#N/A	#N/A	#N/A	#N/A	Complete Remission/Response	#N/A	#N/A	1	74	0	74
TCGA-55-7570	TCGA-55-7570-01A-11R-2039-07	0	5.6993	0	0	0	413.913	1.4728	2.1307	11.6471	0.8715	0	0.4357	0	5.6645	0	1.7429	0	0	5.2288	10.8932	TCGA-55-7570	LUAD	60	MALE	BLACK OR AFRICAN AMERICAN	Stage IA	[Not Applicable]	Lung Adenocarcinoma	[Not Available]	2011	[Not Available]	-22218	Alive	TUMOR FREE	824	#N/A	[Not Available]	#N/A	#N/A	#N/A	#N/A	Complete Remission/Response	#N/A	#N/A	0	824	0	824
TCGA-49-AAR3	TCGA-49-AAR3-01A-11R-A41B-07	0	19.1812	2.77	3.9895	0	1492.94	0	0	190.183	0.8711	0	0	0	0.8711	0	0.8711	1.7422	0	4.3554	1.7422	TCGA-49-AAR3	LUAD	69	MALE	BLACK OR AFRICAN AMERICAN	Stage IIB	[Not Applicable]	Lung Adenocarcinoma	[Not Available]	2008	[Not Available]	-25469	Alive	[Discrepancy]	1893	#N/A	[Not Available]	Locoregional Recurrence	#N/A	#N/A	1893	Complete Remission/Response	#N/A	#N/A	0	1893	0	1893
TCGA-MP-A4SY	TCGA-MP-A4SY-01A-21R-A24X-07	0	3.1214	2.537	0	2.537	98.7379	0	0	0	0.8659	0.8659	1.2988	2.4157	16.0183	0	9.5244	23.3781	0	0	256.726	TCGA-MP-A4SY	LUAD	61	MALE	WHITE	Stage IIB	[Not Applicable]	Lung Adenocarcinoma	[Not Available]	2002	[Not Available]	-22448	Dead	TUMOR FREE	#N/A	1501	[Not Available]	Locoregional Recurrence	#N/A	#N/A	489	Complete Remission/Response	#N/A	#N/A	1	1501	0	1501
TCGA-44-3398	TCGA-44-3398-01A-01R-1107-07	0	0	0	0	0	19.2762	1.2805	0	0	0.8565	2.1413	0.8565	0.8565	2.9979	0.4283	11.9914	2.1413	0.4283	0.4283	221.413	TCGA-44-3398	LUAD	77	FEMALE	WHITE	Stage IA	[Not Applicable]	Lung Adenocarcinoma	[Not Available]	2009	[Not Available]	-28392	Alive	TUMOR FREE	1163	#N/A	[Not Available]	#N/A	#N/A	#N/A	#N/A	Complete Remission/Response	#N/A	#N/A	0	1163	0	1163
TCGA-49-4487	TCGA-49-4487-01A-21R-1858-07	0	0	0	0	0	1.6849	0	0	0	0.8425	0	1.6849	0	0.8425	0	8.4246	0	14.3218	3.3698	198.821	TCGA-49-4487	LUAD	72	FEMALE	WHITE	Stage IA	[Not Applicable]	Lung Adenocarcinoma	[Not Available]	1992	[Not Available]	-26583	Dead	WITH TUMOR	#N/A	855	[Not Available]	#N/A	#N/A	#N/A	697	Complete Remission/Response	#N/A	#N/A	1	855	1	855
TCGA-55-8089	TCGA-55-8089-01A-11R-2241-07	2.1373	16.8784	2.0625	0.6154	5.4931	2474.22	3.7549	0	126.195	0.8317	0	0	0	1.2475	0	0	0.4158	0.4158	3.7424	370.086	TCGA-55-8089	LUAD	56	MALE	WHITE	Stage IA	[Not Applicable]	Lung Adenocarcinoma	[Not Available]	2011	[Not Available]	-20576	Dead	TUMOR FREE	#N/A	702	[Not Available]	#N/A	#N/A	#N/A	#N/A	Complete Remission/Response	#N/A	#N/A	1	702	0	702
TCGA-05-4433	TCGA-05-4433-01A-22R-1858-07	891.099	83.3223	6.281	0	2.1653	681.066	0	8.5702	49.8099	0.8264	42.1488	0	0	1437.19	0	0	199.174	0.8264	3.3058	1000.83	TCGA-05-4433	LUAD	82	MALE	[Not Available]	Stage IB	[Not Applicable]	Lung Adenocarcinoma	[Not Available]	2008	[Not Available]	-30194	Alive	TUMOR FREE	730	#N/A	[Not Available]	#N/A	#N/A	#N/A	#N/A	[Not Applicable]	#N/A	#N/A	0	730	0	730
TCGA-MP-A4TF	TCGA-MP-A4TF-01A-11R-A262-07	0	0	0	0	0	0.8157	0	0	0	0.8157	0	4.894	104.845	6.5253	25.2855	18.7602	17.1289	0.8157	1.6313	75.0408	TCGA-MP-A4TF	LUAD	58	FEMALE	WHITE	Stage IIA	[Not Applicable]	Lung Adenocarcinoma	[Not Available]	2010	[Not Available]	-21387	Dead	WITH TUMOR	#N/A	336	[Not Available]	Distant Metastasis	#N/A	#N/A	195	Partial Remission/Response	#N/A	#N/A	1	336	1	336
TCGA-55-7574	TCGA-55-7574-01A-11R-2039-07	0	0	0	0	0	13.4947	0	0	0	0.7938	0	0	0	5.5567	0	1.5876	0.7938	0	1.5876	38.1028	TCGA-55-7574	LUAD	64	FEMALE	WHITE	Stage IB	[Not Applicable]	Lung Adenocarcinoma	[Not Available]	2011	[Not Available]	-23703	Dead	WITH TUMOR	#N/A	995	[Not Available]	Distant Metastasis	#N/A	#N/A	478	Complete Remission/Response	#N/A	#N/A	1	995	1	995
TCGA-38-4631	TCGA-38-4631-01A-01R-1755-07	0	0	0	0	0	12.5561	0	0	0	0.7848	3.139	6.2781	1.5695	28.2513	0	9.4171	72.1978	0	0.7848	251.123	TCGA-38-4631	LUAD	72	FEMALE	WHITE	Stage IB	[Not Applicable]	Lung Adenocarcinoma	[Not Available]	1997	[Not Available]	-26538	Dead	WITH TUMOR	#N/A	354	[Not Available]	#N/A	#N/A	#N/A	#N/A	Progressive Disease	#N/A	#N/A	1	354	1	354
TCGA-55-7907	TCGA-55-7907-01A-11R-2170-07	0	0	0	0	0	37.5293	0	0	0	0.7819	1.5637	0.7819	0	0.7819	0	1.5637	3.1274	0	2.3456	60.9851	TCGA-55-7907	LUAD	77	MALE	WHITE	Stage IIA	[Not Applicable]	Lung Adenocarcinoma	[Not Available]	2011	[Not Available]	-28201	Dead	WITH TUMOR	#N/A	343	[Not Available]	Distant Metastasis	#N/A	#N/A	294	Complete Remission/Response	#N/A	#N/A	1	343	1	343
TCGA-86-8076	TCGA-86-8076-01A-31R-2241-07	0	0	2.8416	0	0	269.519	0	0	7.1175	0.7796	0	0	0	3.5081	0	1.1694	1.1694	0	1.5592	76.7882	TCGA-86-8076	LUAD	42	MALE	WHITE	Stage IA	[Not Applicable]	Lung Adenocarcinoma	[Not Available]	2011	[Not Available]	-15605	Alive	TUMOR FREE	993	#N/A	[Not Available]	#N/A	#N/A	#N/A	#N/A	Complete Remission/Response	#N/A	#N/A	0	993	0	993
TCGA-93-7347	TCGA-93-7347-01A-11R-2187-07	0	3.2246	0	0	2.0707	281.768	0	8.0381	12.5874	0.777	0.3885	0	0	0	0	0.3885	0.777	0	6.6045	111.111	TCGA-93-7347	LUAD	76	FEMALE	WHITE	Stage IA	[Not Applicable]	Lung Adenocarcinoma	[Not Available]	2011	[Not Available]	-27949	Alive	TUMOR FREE	683	#N/A	[Not Available]	#N/A	#N/A	#N/A	#N/A	Complete Remission/Response	#N/A	#N/A	0	683	0	683
TCGA-49-4512	TCGA-49-4512-01A-21R-1858-07	0	0	0	0	0	32.475	0	0	2.8824	0.7686	0	1.5373	0	9.9923	0	0	86.0876	0	0.7686	3.0746	TCGA-49-4512	LUAD	69	FEMALE	WHITE	Stage IIIA	[Not Applicable]	Lung Adenocarcinoma	[Not Available]	2007	[Not Available]	-25502	Dead	WITH TUMOR	157	905	[Not Available]	#N/A	#N/A	#N/A	#N/A	Progressive Disease	#N/A	#N/A	1	905	1	905
TCGA-91-6830	TCGA-91-6830-01A-11R-1949-07	40.59	28.4444	2.5824	0	0	3109.54	0	10.0077	93.8851	0.7663	0.7663	0	0	4.5977	0.7663	7.6628	21.4559	0	2.2989	17.6245	TCGA-91-6830	LUAD	65	FEMALE	WHITE	Stage IIA	[Not Applicable]	Lung Adenocarcinoma	[Not Available]	2002	[Not Available]	-23922	Alive	WITH TUMOR	60	#N/A	[Not Available]	Distant Metastasis	#N/A	#N/A	18	[Unknown]	#N/A	#N/A	0	60	0	60
TCGA-49-4514	TCGA-49-4514-01A-21R-1858-07	831.518	11.0711	13.7031	0	2.8079	6354.57	0	10.6197	634.885	0.7651	0	1.5302	0	26.7787	0	168.323	13.0068	0	2.2953	183.626	TCGA-49-4514	LUAD	79	FEMALE	WHITE	Stage IA	[Not Applicable]	Lung Adenocarcinoma	[Not Available]	2007	[Not Available]	-28908	Alive	TUMOR FREE	1700	#N/A	[Not Available]	#N/A	#N/A	#N/A	#N/A	Complete Remission/Response	#N/A	#N/A	0	1700	0	1700
TCGA-49-4488	TCGA-49-4488-01A-01R-1755-07	0	1.9739	0	0	0	2039.1	0	0	139.072	0.7338	0	0	0	0	0	0.7338	0.7338	0	0	0.7338	TCGA-49-4488	LUAD	74	FEMALE	WHITE	Stage IA	[Not Applicable]	Lung Adenocarcinoma	[Not Available]	1992	[Not Available]	-27332	Dead	#N/A	#N/A	869	[Not Available]	#N/A	#N/A	#N/A	634	[Not Available]	#N/A	#N/A	1	869	#N/A	869
TCGA-55-8207	TCGA-55-8207-01A-11R-2241-07	8.34	1.1115	0	0	0	9.8583	1.1442	5.3469	17.7879	0.7265	0.3632	0	0	2.5427	0.3632	3.6324	0.3632	0	0	134.762	TCGA-55-8207	LUAD	73	MALE	WHITE	Stage IB	[Not Applicable]	Lung Adenocarcinoma	[Not Available]	2011	[Not Available]	-26897	Alive	TUMOR FREE	977	#N/A	[Not Available]	#N/A	#N/A	#N/A	#N/A	Complete Remission/Response	#N/A	#N/A	0	977	0	977
TCGA-55-6979	TCGA-55-6979-01A-11R-1949-07	0	0	0	0	0	1.4094	0	0	0	0.7047	0	0.7047	0	1.4094	0	0	2.8188	0	3.5235	281.877	TCGA-55-6979	LUAD	59	FEMALE	WHITE	Stage IIB	[Not Applicable]	Lung Adenocarcinoma	[Not Available]	2006	[Not Available]	-21780	Dead	WITH TUMOR	#N/A	237	[Not Available]	Distant Metastasis	#N/A	#N/A	195	Progressive Disease	#N/A	#N/A	1	237	1	237
TCGA-55-8087	TCGA-55-8087-01A-11R-2241-07	0	0	0	0	0	4.5375	0	0	0	0.6981	0	0.6981	0.6981	8.0279	0	2.0942	0.349	0	0.6981	34.2059	TCGA-55-8087	LUAD	59	FEMALE	WHITE	Stage IB	[Not Applicable]	Lung Adenocarcinoma	[Not Available]	2011	[Not Available]	-21655	Alive	TUMOR FREE	462	#N/A	[Not Available]	#N/A	#N/A	#N/A	#N/A	Complete Remission/Response	#N/A	#N/A	0	462	0	462
TCGA-86-8056	TCGA-86-8056-01A-11R-2241-07	17.4918	53.5597	3.5926	3.5129	0.8973	6275.09	0.5197	0	260.613	0.6929	0	0.3464	0	4.1573	0	0	1.0393	0.3464	0	203.361	TCGA-86-8056	LUAD	63	FEMALE	WHITE	Stage IIIA	[Not Applicable]	Lung Adenocarcinoma	[Not Available]	2011	[Not Available]	-23369	Alive	TUMOR FREE	139	#N/A	[Not Available]	#N/A	#N/A	#N/A	#N/A	Complete Remission/Response	#N/A	#N/A	0	139	0	139
TCGA-86-8358	TCGA-86-8358-01A-11R-2326-07	0	7.785	3.5278	16.1733	0	156.196	0	0	0	0.6631	0	0	0	0	0	1.9893	0	920.402	59.0171	790.431	TCGA-86-8358	LUAD	44	MALE	WHITE	Stage IB	[Not Applicable]	Lung Adenocarcinoma	[Not Available]	2012	[Not Available]	-16409	Alive	TUMOR FREE	653	#N/A	[Not Available]	#N/A	#N/A	#N/A	#N/A	Complete Remission/Response	#N/A	#N/A	0	653	0	653
TCGA-05-4397	TCGA-05-4397-01A-01R-1206-07	236.232	1.1463	2.9619	1.6963	0	2615.75	673.8	76.3335	308.369	0.6626	0	1.1044	0	1.1044	0	0.4417	66.9244	0	21.8664	349.641	TCGA-05-4397	LUAD	65	MALE	[Not Available]	Stage IIB	[Not Applicable]	Lung Adenocarcinoma	[Not Available]	2006	[Not Available]	-23833	Dead	#N/A	#N/A	731	[Not Available]	#N/A	#N/A	#N/A	#N/A	[Not Available]	#N/A	#N/A	1	731	#N/A	731
TCGA-78-8662	TCGA-78-8662-01A-11R-2403-07	2.2105	0	0	0	0	0.9067	0	2.1774	0	0.6618	0	0	1.9854	3.3091	0	5.9563	0	0	0	3.9709	TCGA-78-8662	LUAD	53	FEMALE	[Not Evaluated]	Stage IB	[Not Applicable]	Lung Adenocarcinoma	[Not Available]	2000	[Not Available]	-19563	Dead	#N/A	#N/A	3361	[Not Available]	Locoregional Recurrence	#N/A	#N/A	3044	Complete Remission/Response	#N/A	#N/A	1	3361	#N/A	3361
TCGA-S2-AA1A	TCGA-S2-AA1A-01A-12R-A39D-07	0	7.4103	0	0	0	1274.68	0	0	44.6843	0.6552	1.9656	0	0	56.3468	0	5.2416	3.276	0	12.4487	570.02	TCGA-S2-AA1A	LUAD	68	FEMALE	BLACK OR AFRICAN AMERICAN	Stage IA	[Not Applicable]	Lung Adenocarcinoma	[Not Available]	2013	[Not Available]	-24903	Alive	TUMOR FREE	513	#N/A	[Not Available]	#N/A	#N/A	#N/A	#N/A	Complete Remission/Response	#N/A	#N/A	0	513	0	513
TCGA-64-5781	TCGA-64-5781-01A-01R-1628-07	0	28.4373	8.2186	0	0	3013.24	457.01	1.9614	271.846	0.6431	2.5723	0	0	9.6463	0	0.6431	8.3601	0	3.8585	67.5241	TCGA-64-5781	LUAD	55	FEMALE	WHITE	Stage IB	[Not Applicable]	Lung Adenocarcinoma	[Not Available]	2007	[Not Available]	-20219	Alive	TUMOR FREE	1559	#N/A	[Not Available]	#N/A	#N/A	#N/A	96	Progressive Disease	#N/A	#N/A	0	1559	0	1559
TCGA-50-5941	TCGA-50-5941-01A-11R-1755-07	0	0	0	0	0	16.6667	0	0	0	0.641	0	0	0	4.4872	0	0	1.2821	0.641	1.9231	15.3846	TCGA-50-5941	LUAD	55	FEMALE	WHITE	Stage IIIA	[Not Applicable]	Lung Adenocarcinoma	[Not Available]	2010	[Not Available]	-20350	Alive	TUMOR FREE	1474	#N/A	[Not Available]	#N/A	#N/A	#N/A	#N/A	Complete Remission/Response	#N/A	#N/A	0	1474	0	1474
TCGA-55-8096	TCGA-55-8096-01A-11R-2241-07	0	0.8857	0.6143	0.5956	0	179.376	0	4.7027	0	0.6237	0	0.3118	1.2474	1.8711	0.3118	1.2474	1.2474	4.6777	7.7962	228.898	TCGA-55-8096	LUAD	67	FEMALE	WHITE	Stage IB	[Not Applicable]	Lung Adenocarcinoma	[Not Available]	2011	[Not Available]	-24684	Dead	WITH TUMOR	#N/A	719	[Not Available]	Distant Metastasis	#N/A	#N/A	566	Complete Remission/Response	#N/A	#N/A	1	719	1	719
TCGA-55-8090	TCGA-55-8090-01A-11R-2241-07	1.2852	0	0	0	0	6.7668	0	0	0	0.6194	0	8.6714	55.5404	8.052	28.1821	5.8842	22.2979	0	0.3097	20.1301	TCGA-55-8090	LUAD	80	MALE	WHITE	Stage IA	[Not Applicable]	Lung Adenocarcinoma	[Not Available]	2011	[Not Available]	-29235	Dead	WITH TUMOR	#N/A	598	[Not Available]	Distant Metastasis	#N/A	#N/A	548	Complete Remission/Response	#N/A	#N/A	1	598	1	598
TCGA-49-AAR2	TCGA-49-AAR2-01A-11R-A39D-07	147.51	14.6322	7.4244	2.3882	4.9496	8228.63	5.0114	9.3238	1588.16	0.6187	0	0	19.5385	79.8119	0.6187	7.4244	1.8561	958.98	4.9496	11.1365	TCGA-49-AAR2	LUAD	64	MALE	BLACK OR AFRICAN AMERICAN	Stage IB	[Not Applicable]	Lung Adenocarcinoma	[Not Available]	2009	[Not Available]	-23479	Alive	TUMOR FREE	2224	#N/A	[Not Available]	#N/A	#N/A	#N/A	#N/A	Complete Remission/Response	#N/A	#N/A	0	2224	0	2224
TCGA-55-8510	TCGA-55-8510-01A-11R-2403-07	1.7931	21.8605	9.2166	5.3794	0	6670.94	0	0	460.942	0.612	1.836	0	0	2.448	0	4.284	4.284	1.836	2.448	14.0759	TCGA-55-8510	LUAD	55	FEMALE	WHITE	Stage IB	[Not Applicable]	Lung Adenocarcinoma	[Not Available]	2012	[Not Available]	-20410	Alive	TUMOR FREE	539	#N/A	[Not Available]	#N/A	#N/A	#N/A	#N/A	Complete Remission/Response	#N/A	#N/A	0	539	0	539
TCGA-55-6968	TCGA-55-6968-01A-11R-1949-07	0	4.4934	3.028	0	0	312.438	0	0	27.4928	0.5724	0	0	0	2.2896	0	1.1448	0	10.8758	9.731	416.142	TCGA-55-6968	LUAD	61	MALE	WHITE	Stage IV	[Not Applicable]	Lung Adenocarcinoma	[Not Available]	2004	[Not Available]	-22344	Dead	WITH TUMOR	#N/A	1293	[Not Available]	#N/A	#N/A	#N/A	#N/A	Stable Disease	#N/A	#N/A	1	1293	1	1293
TCGA-38-A44F	TCGA-38-A44F-01A-11R-A24H-07	137.397	10.1884	0	0	0	892.095	0	1.9406	53.1336	0.5708	1125	5.7078	0.5708	1329.34	1.1416	0	1550.23	0.5708	2.2831	272.831	TCGA-38-A44F	LUAD	80	MALE	WHITE	Stage IB	[Not Applicable]	Lung Adenocarcinoma	[Not Available]	2012	[Not Available]	-29534	Alive	TUMOR FREE	133	#N/A	[Not Available]	#N/A	#N/A	#N/A	#N/A	Complete Remission/Response	#N/A	#N/A	0	133	0	133
TCGA-49-4494	TCGA-49-4494-01A-01R-1206-07	0	0	0	0	0	7.9506	0	0	0	0.5679	0	7.9506	7.3827	58.2097	6.8148	0.2839	23.5678	0	1.9876	345.283	TCGA-49-4494	LUAD	77	MALE	WHITE	Stage IIIA	[Not Applicable]	Lung Adenocarcinoma	[Not Available]	1995	[Not Available]	-28387	Dead	WITH TUMOR	#N/A	1081	[Not Available]	#N/A	#N/A	#N/A	#N/A	Complete Remission/Response	#N/A	#N/A	1	1081	1	1081
TCGA-50-8459	TCGA-50-8459-01A-11R-2326-07	122.351	6.4734	1.6393	0	0	165.483	1.6561	0	31.3823	0.5595	28.5344	0.5595	0	68.8183	0.5595	0.5595	49.2359	0.5595	1.119	118.054	TCGA-50-8459	LUAD	68	MALE	WHITE	Stage IIB	[Not Applicable]	Lung Adenocarcinoma	[Not Available]	2012	[Not Available]	-24859	Alive	WITH TUMOR	1119	#N/A	[Not Available]	Locoregional Recurrence	#N/A	#N/A	432	Progressive Disease	#N/A	#N/A	0	1119	0	1119
TCGA-50-5049	TCGA-50-5049-01A-01R-1628-07	0	0	0	0	0	7.8125	0	0	0	0.558	0	0	0	12.8348	0	1.6741	0	0	1.1161	94.308	TCGA-50-5049	LUAD	70	MALE	WHITE	Stage IA	[Not Applicable]	Lung Adenocarcinoma	[Not Available]	2006	[Not Available]	-25577	Alive	WITH TUMOR	3094	#N/A	[Not Available]	Locoregional Recurrence	#N/A	#N/A	1568	Progressive Disease	#N/A	#N/A	0	3094	0	3094
TCGA-78-7149	TCGA-78-7149-01A-11R-2039-07	0	5.8175	9.8428	5.7072	1.9686	17638.6	0	0	501.279	0.5514	0	0	0	38.5994	0	1.6543	6.0656	0	0	5.5142	TCGA-78-7149	LUAD	71	MALE	WHITE	Stage IIIB	[Not Applicable]	Lung Adenocarcinoma	[Not Available]	2002	[Not Available]	-26285	Alive	#N/A	3940	#N/A	[Not Available]	#N/A	#N/A	#N/A	#N/A	Complete Remission/Response	#N/A	#N/A	0	3940	0	3940
TCGA-44-6148	TCGA-44-6148-01A-11R-1755-07	4.2534	2.8552	0	0	0	93.3494	0	0	18.4599	0.5357	38.034	0	0	2880.94	0	0	8.571	8.0354	6.4283	177.314	TCGA-44-6148	LUAD	60	MALE	WHITE	Stage IA	[Not Applicable]	Lung Adenocarcinoma	[Not Available]	2011	[Not Available]	-22138	Alive	TUMOR FREE	704	#N/A	[Not Available]	#N/A	#N/A	#N/A	#N/A	Complete Remission/Response	#N/A	#N/A	0	704	0	704
TCGA-55-8621	TCGA-55-8621-01A-11R-2403-07	0	2.266	0	0	0	52.2566	0	0	2.2553	0.5357	0	0	0.5357	5.3569	0	10.1781	3.2141	0	19.8205	84.6391	TCGA-55-8621	LUAD	75	FEMALE	WHITE	Stage IA	[Not Applicable]	Lung Adenocarcinoma	[Not Available]	2012	[Not Available]	-27485	Alive	TUMOR FREE	515	#N/A	[Not Available]	#N/A	#N/A	#N/A	#N/A	Complete Remission/Response	#N/A	#N/A	0	515	0	515
TCGA-86-7954	TCGA-86-7954-01A-11R-2187-07	91.7243	0	0.4121	0	0	88.9547	0	5.5473	7.6372	0.5352	0	1.0704	8.2286	118.01	0.8028	0.2676	88.5747	0	5.3519	92.0534	TCGA-86-7954	LUAD	68	FEMALE	WHITE	Stage IB	[Not Applicable]	Lung Adenocarcinoma	[Not Available]	2011	[Not Available]	-25062	Alive	TUMOR FREE	605	#N/A	[Not Available]	#N/A	#N/A	#N/A	#N/A	Complete Remission/Response	#N/A	#N/A	0	605	0	605
TCGA-97-7554	TCGA-97-7554-01A-11R-2039-07	1.4207	0	0	0	0	4.1421	0	0	1.4407	0.5003	0	0	0.5003	6.003	0	2.001	4.002	0	9.5048	335.668	TCGA-97-7554	LUAD	83	FEMALE	WHITE	Stage IIIA	[Not Applicable]	Lung Adenocarcinoma	[Not Available]	2010	[Not Available]	-30327	Alive	TUMOR FREE	775	#N/A	[Not Available]	#N/A	#N/A	#N/A	#N/A	Complete Remission/Response	#N/A	#N/A	0	775	0	775
TCGA-49-AAR0	TCGA-49-AAR0-01A-21R-A39D-07	2.4294	12.35	8.2102	0.8974	0	5453.09	0.9172	1.77	161.889	0.4958	0	0	0	2.4789	0	2.9747	2.4789	1.4874	7.4368	94.6951	TCGA-49-AAR0	LUAD	57	MALE	BLACK OR AFRICAN AMERICAN	Stage IA	[Not Applicable]	Lung Adenocarcinoma	[Not Available]	2002	[Not Available]	-20932	Alive	TUMOR FREE	4765	#N/A	[Not Available]	#N/A	#N/A	#N/A	#N/A	Complete Remission/Response	#N/A	#N/A	0	4765	0	4765
TCGA-95-A4VK	TCGA-95-A4VK-01A-11R-A262-07	0	0	0	0	0	0	0	1.9522	0	0.488	0	0	0	0	0	1.4641	0	3.9043	1.4641	18.0576	TCGA-95-A4VK	LUAD	74	FEMALE	WHITE	Stage IIIA	[Not Applicable]	Lung Adenocarcinoma	[Not Available]	2012	[Not Available]	-27040	Alive	WITH TUMOR	651	#N/A	[Not Available]	Distant Metastasis	#N/A	#N/A	496	Stable Disease	#N/A	#N/A	0	651	0	651
TCGA-44-A4SU	TCGA-44-A4SU-01A-11R-A24X-07	14.7013	0	0	0	0	74.0603	0	0.9203	0	0.4695	0	0	1.4086	4.6954	0	15.0252	10.3299	0	5.1649	41.7889	TCGA-44-A4SU	LUAD	67	FEMALE	WHITE	Stage IA	[Not Applicable]	Lung Adenocarcinoma	[Not Available]	2012	[Not Available]	-24820	Dead	WITH TUMOR	#N/A	409	[Not Available]	Locoregional Recurrence	#N/A	#N/A	260	Complete Remission/Response	#N/A	#N/A	1	409	1	409
TCGA-67-3772	TCGA-67-3772-01A-01R-0946-07	1.7088	0	0	0	0	49.78	0	0	0.4775	0.4682	2.809	3.7453	93.1227	1599.25	0	3.2772	19.1948	1.4045	0.4682	61.3296	TCGA-67-3772	LUAD	82	FEMALE	WHITE	Stage IB	[Not Applicable]	Lung Adenocarcinoma	[Not Available]	2009	[Not Available]	-29989	Alive	TUMOR FREE	573	#N/A	[Not Available]	#N/A	#N/A	#N/A	#N/A	[Not Available]	#N/A	#N/A	0	573	0	573
TCGA-MP-A4SW	TCGA-MP-A4SW-01A-21R-A24X-07	150.428	2.3953	0	0	0	7.2177	0	8.8388	5.5282	0.4554	0	1.8215	0.4554	14.5719	0	1.3661	6.8306	0.4554	2.2769	102.459	TCGA-MP-A4SW	LUAD	53	MALE	WHITE	Stage IIB	[Not Applicable]	Lung Adenocarcinoma	[Not Available]	2002	[Not Available]	-19640	Dead	#N/A	#N/A	1778	[Not Available]	#N/A	#N/A	#N/A	#N/A	Complete Remission/Response	#N/A	#N/A	1	1778	#N/A	1778
TCGA-44-A47B	TCGA-44-A47B-01A-11R-A24H-07	0	0	0	0	0	3.5826	0	0	0	0.4478	0.8957	0	0	1.7913	0.4478	1.3435	0.8957	1.7913	0	78.3699	TCGA-44-A47B	LUAD	79	MALE	WHITE	Stage IB	[Not Applicable]	Lung Adenocarcinoma	[Not Available]	2012	[Not Available]	-28869	Alive	TUMOR FREE	287	#N/A	[Not Available]	#N/A	#N/A	#N/A	#N/A	Complete Remission/Response	#N/A	#N/A	0	287	0	287
TCGA-53-7624	TCGA-53-7624-01A-11R-2066-07	2.3496	153.808	9.0733	10.3118	4.888	10175.6	13.3377	0.6807	550.026	0.4392	0	0	0	0	0	0	0	0	43.4783	120.773	TCGA-53-7624	LUAD	40	FEMALE	WHITE	Stage IV	[Not Applicable]	Lung Adenocarcinoma	[Not Available]	2008	[Not Available]	-14794	Dead	WITH TUMOR	#N/A	1043	[Not Available]	Distant Metastasis	#N/A	#N/A	400	Progressive Disease	#N/A	#N/A	1	1043	1	1043
TCGA-L9-A5IP	TCGA-L9-A5IP-01A-21R-A39D-07	1.1043	7.7826	3.3655	0	0	1487.86	1.1306	0.6529	45.4294	0.4382	0	0.4382	0	0.8764	0	0	0	0	0.8764	17.0903	TCGA-L9-A5IP	LUAD	40	FEMALE	BLACK OR AFRICAN AMERICAN	Stage IV	[Not Applicable]	Lung Adenocarcinoma	[Not Available]	2012	[Not Available]	-14681	Dead	WITH TUMOR	#N/A	58	[Not Available]	Locoregional Recurrence|Distant Metastasis	#N/A	#N/A	49	Progressive Disease	#N/A	#N/A	1	58	1	58
TCGA-50-5932	TCGA-50-5932-01A-11R-1755-07	0	0	0	0	0	0.4156	0	0	0	0.4156	0	0	2.4938	4.1563	0	2.4938	0.8313	0.4156	0.8313	126.766	TCGA-50-5932	LUAD	75	MALE	WHITE	Stage IIB	[Not Applicable]	Lung Adenocarcinoma	[Not Available]	2001	[Not Available]	-27454	Dead	WITH TUMOR	1091	1235	[Not Available]	Locoregional Recurrence	#N/A	#N/A	1090	Progressive Disease	#N/A	#N/A	1	1235	1	1235
TCGA-55-8203	TCGA-55-8203-01A-11R-2241-07	0	0	0	0	0	2.022	0	0	0	0.4044	0	1.6176	80.8007	69.9626	0.8088	474.775	58.6392	0.4044	5.2573	279.042	TCGA-55-8203	LUAD	69	FEMALE	WHITE	Stage IA	[Not Applicable]	Lung Adenocarcinoma	[Not Available]	2011	[Not Available]	-25477	Alive	TUMOR FREE	547	#N/A	[Not Available]	#N/A	#N/A	#N/A	#N/A	Complete Remission/Response	#N/A	#N/A	0	547	0	547
TCGA-49-4506	TCGA-49-4506-01A-01R-1206-07	0	191.209	35.089	1.0347	2.1252	5293.24	609.297	20.3164	201.274	0.398	2.3878	0	0.398	0.398	0	3.1838	16.3168	2.7858	1.1939	7.5614	TCGA-49-4506	LUAD	68	FEMALE	WHITE	Stage IIB	[Not Applicable]	Lung Adenocarcinoma	[Not Available]	1997	[Not Available]	-25132	Dead	[Discrepancy]	#N/A	999	[Not Available]	Locoregional Recurrence	#N/A	#N/A	692	Complete Remission/Response	#N/A	#N/A	1	999	#N/A	999
TCGA-78-7147	TCGA-78-7147-01A-11R-2039-07	0	7.5511	2.1362	0	0	2110.01	0	0	86.552	0.3912	0	0	0	5.8687	0	5.0862	4.695	0	23.0837	201.493	TCGA-78-7147	LUAD	67	FEMALE	WHITE	Stage IIB	[Not Applicable]	Lung Adenocarcinoma	[Not Available]	2001	[Not Available]	-24809	Dead	WITH TUMOR	#N/A	586	[Not Available]	#N/A	#N/A	#N/A	578	[Not Available]	#N/A	#N/A	1	586	1	586
TCGA-62-8398	TCGA-62-8398-01A-11R-2326-07	9.7097	3217.65	83.0936	0.5292	3.3967	6683	0	1.186	229.835	0.3753	2.252	3.0026	10.5054	7.5065	1.126	1.5013	915.047	66.0575	0	49.9185	TCGA-62-8398	LUAD	55	MALE	WHITE	Stage IIIA	[Not Applicable]	Lung Adenocarcinoma	[Not Available]	2007	[Not Available]	-20197	Dead	TUMOR FREE	#N/A	444	[Not Available]	#N/A	#N/A	#N/A	#N/A	Complete Remission/Response	#N/A	#N/A	1	444	0	444
TCGA-L9-A50W	TCGA-L9-A50W-01A-12R-A39D-07	0	0	0	0	0	39.2326	0	1.0729	1.7107	0.3751	0.3751	1.1254	52.0888	40.8907	1.5006	3.3763	4.1266	0	3.0012	4.5017	TCGA-L9-A50W	LUAD	75	MALE	BLACK OR AFRICAN AMERICAN	Stage IIA	[Not Applicable]	Lung Adenocarcinoma	[Not Available]	2012	[Not Available]	-27414	Dead	WITH TUMOR	#N/A	442	[Not Available]	Distant Metastasis	#N/A	#N/A	389	Complete Remission/Response	#N/A	#N/A	1	442	1	442
TCGA-55-6983	TCGA-55-6983-01A-11R-1949-07	0	1.0567	0	0	0	122.702	0	0	0	0.3546	0.3546	1.0638	1.4184	136.879	0.7092	131.206	1.4184	12.0567	2.1277	79.4326	TCGA-55-6983	LUAD	81	MALE	WHITE	Stage IIB	[Not Applicable]	Lung Adenocarcinoma	[Not Available]	2005	[Not Available]	#N/A	Alive	TUMOR FREE	2823	#N/A	[Not Available]	#N/A	#N/A	#N/A	#N/A	Complete Remission/Response	#N/A	#N/A	0	2823	0	2823
TCGA-55-8085	TCGA-55-8085-01A-11R-2241-07	0	98.1663	11.9833	3.0932	3.1524	12598.8	0	0	1660.22	0.3479	0	0	0	1.3918	0	33.055	0.6959	0.6959	2.0877	116.562	TCGA-55-8085	LUAD	64	MALE	WHITE	Stage IA	[Not Applicable]	Lung Adenocarcinoma	[Not Available]	2011	[Not Available]	-23596	Alive	TUMOR FREE	904	#N/A	[Not Available]	#N/A	#N/A	#N/A	#N/A	Complete Remission/Response	#N/A	#N/A	0	904	0	904
TCGA-49-4507	TCGA-49-4507-01A-01R-1206-07	1.9543	7.8347	4.5936	1.2868	0	5863.1	104.303	4.9914	382.747	0.3459	0	0	0	0.6918	0	0.3459	11.7606	0	6.2262	116.569	TCGA-49-4507	LUAD	73	FEMALE	WHITE	Stage IIIA	[Not Applicable]	Lung Adenocarcinoma	[Not Available]	1997	[Not Available]	-26851	Dead	WITH TUMOR	#N/A	268	[Not Available]	#N/A	#N/A	#N/A	158	Progressive Disease	#N/A	#N/A	1	268	1	268
TCGA-86-8073	TCGA-86-8073-01A-11R-2241-07	1.6463	20.3368	0	0	0	112.686	0	0	81.8629	0.3437	0	0	0	6.1866	0	6.1866	3.437	0	1.7185	84.8943	TCGA-86-8073	LUAD	58	MALE	WHITE	Stage IB	[Not Applicable]	Lung Adenocarcinoma	[Not Available]	2011	[Not Available]	-21214	Alive	TUMOR FREE	740	#N/A	[Not Available]	#N/A	#N/A	#N/A	#N/A	Complete Remission/Response	#N/A	#N/A	0	740	0	740
TCGA-05-4389	TCGA-05-4389-01A-01R-1206-07	129.396	103.564	37.4128	1.0369	3.1611	15908.6	0	2.0503	920.141	0.3356	0	0.6711	0.6711	11.0738	0.3356	20.8054	2.0134	50.6711	9.7315	287.584	TCGA-05-4389	LUAD	70	MALE	[Not Available]	Stage IA	[Not Applicable]	Lung Adenocarcinoma	[Not Available]	2005	[Not Available]	-25660	Alive	TUMOR FREE	1369	#N/A	[Not Available]	#N/A	#N/A	#N/A	#N/A	[Not Applicable]	#N/A	#N/A	0	1369	0	1369
TCGA-55-6970	TCGA-55-6970-01A-11R-1949-07	0	5.4835	4.5358	0	0	4.8024	0.9187	0	0	0.3212	0	0.3212	0.3212	1.2849	0	14.4555	3.2123	0.6425	1.2849	41.4391	TCGA-55-6970	LUAD	67	FEMALE	WHITE	Stage IIIA	[Not Applicable]	Lung Adenocarcinoma	[Not Available]	2004	[Not Available]	-24773	Dead	WITH TUMOR	#N/A	464	[Not Available]	Locoregional Recurrence	#N/A	#N/A	457	Stable Disease	#N/A	#N/A	1	464	1	464
TCGA-71-6725	TCGA-71-6725-01A-11R-1858-07	1.5601	0	0	0	0	0	0	0	0	0.312	0	0	0	0	0	0.6241	0	0	0	0.6241	TCGA-71-6725	LUAD	48	FEMALE	ASIAN	Stage IB	[Not Applicable]	Lung Adenocarcinoma	[Not Available]	2011	[Not Available]	-17793	Alive	WITH TUMOR	256	#N/A	[Not Available]	Locoregional Recurrence	#N/A	#N/A	164	Progressive Disease	#N/A	#N/A	0	256	0	256
TCGA-55-7284	TCGA-55-7284-01B-11R-2241-07	633.084	33.2421	1.4804	0	0.8571	185.559	0.8664	3.8584	52.6713	0.3117	907.567	0.935	0.6233	1477.6	0.3117	2.1817	244.033	1.2467	1.2467	467.185	TCGA-55-7284	LUAD	74	MALE	WHITE	Stage IIB	[Not Applicable]	Lung Adenocarcinoma	[Not Available]	2011	[Not Available]	-27087	Dead	WITH TUMOR	#N/A	243	[Not Available]	Distant Metastasis	#N/A	#N/A	231	Complete Remission/Response	#N/A	#N/A	1	243	1	243
TCGA-69-7980	TCGA-69-7980-01A-11R-2187-07	0	0	0	0	1.1054	20.7303	0	0	0.8237	0.3062	5.5118	15.6166	52.233	139.631	1.8373	37.6636	8.88	0.6124	1.8373	98.9053	TCGA-69-7980	LUAD	70	FEMALE	WHITE	Stage I	[Not Applicable]	Lung Adenocarcinoma	[Not Available]	2011	[Not Available]	-25583	Alive	TUMOR FREE	411	#N/A	[Not Available]	#N/A	#N/A	#N/A	#N/A	Complete Remission/Response	#N/A	#N/A	0	411	0	411
TCGA-86-8279	TCGA-86-8279-01A-11R-2287-07	0.7496	0	0	0	0	0.7319	0	0	0	0.2963	0	0	0	0.2963	0	0.8889	0	0	0.2963	0.5926	TCGA-86-8279	LUAD	46	MALE	WHITE	Stage IIA	[Not Applicable]	Lung Adenocarcinoma	[Not Available]	2011	[Not Available]	-17032	Alive	TUMOR FREE	949	#N/A	[Not Available]	#N/A	#N/A	#N/A	#N/A	Complete Remission/Response	#N/A	#N/A	0	949	0	949
TCGA-64-1679	TCGA-64-1679-01A-21R-2066-07	27.6088	23.8363	4.4486	0	0.7458	2750.52	0	4.7649	80.1248	0.2902	0.2902	0.5804	6.6744	3.7725	0.8706	2.6117	2.3215	4.6431	0.8706	318.63	TCGA-64-1679	LUAD	58	FEMALE	WHITE	Stage IIIA	[Not Applicable]	Lung Adenocarcinoma	[Not Available]	2007	[Not Available]	-21310	Alive	TUMOR FREE	2488	#N/A	[Not Available]	#N/A	#N/A	#N/A	#N/A	Complete Remission/Response	#N/A	#N/A	0	2488	0	2488
TCGA-53-7626	TCGA-53-7626-01A-12R-2066-07	0.8849	0	0	0	0	4.5213	0	0	0	0.2845	0	0	0	1.1382	0	17.0723	0.5691	0	0.8536	22.4786	TCGA-53-7626	LUAD	76	FEMALE	WHITE	Stage IIA	[Not Applicable]	Lung Adenocarcinoma	[Not Available]	2008	[Not Available]	-28024	Dead	WITH TUMOR	#N/A	929	[Not Available]	Locoregional Recurrence	#N/A	#N/A	865	Progressive Disease	#N/A	#N/A	1	929	1	929
TCGA-49-4505	TCGA-49-4505-01A-01R-1206-07	0	0	0	0	0	14.1763	0	2.1022	0	0.2807	0	0.2807	0	2.526	0	2.2453	10.9458	0	2.526	2.8066	TCGA-49-4505	LUAD	61	FEMALE	WHITE	Stage IIB	[Not Applicable]	Lung Adenocarcinoma	[Not Available]	1996	[Not Available]	-22628	Dead	WITH TUMOR	#N/A	428	[Not Available]	Distant Metastasis|New Primary Tumor	#N/A	#N/A	417	Complete Remission/Response	#N/A	#N/A	1	428	1	428
TCGA-44-8120	TCGA-44-8120-01A-11R-2241-07	1.0345	0	0	0	0	55.1967	0	0	2.6408	0.2803	0	0	0	0.5607	0	7.2889	0	0.2803	0.841	21.8667	TCGA-44-8120	LUAD	58	MALE	BLACK OR AFRICAN AMERICAN	Stage IB	[Not Applicable]	Lung Adenocarcinoma	[Not Available]	2011	[Not Available]	-21188	Alive	TUMOR FREE	260	#N/A	[Not Available]	#N/A	#N/A	#N/A	#N/A	Complete Remission/Response	#N/A	#N/A	0	260	0	260
TCGA-78-7542	TCGA-78-7542-01A-21R-2066-07	0	0	0	0	0	28.4543	0	0	4.7326	0.2789	0.5578	0	0	2.7888	0	0	9.7609	0	1.3944	598.201	TCGA-78-7542	LUAD	56	MALE	WHITE	Stage IB	[Not Applicable]	Lung Adenocarcinoma	[Not Available]	1993	[Not Available]	-20763	Dead	#N/A	#N/A	321	[Not Available]	#N/A	#N/A	#N/A	#N/A	[Not Available]	#N/A	#N/A	1	321	#N/A	321
TCGA-05-4403	TCGA-05-4403-01A-01R-1206-07	2870.39	80.4281	5.4823	0	0	359.211	24.5649	31.315	153.492	0.278	6.3942	0.278	13.3445	950.236	0	1.6681	32.8051	0	0	668.613	TCGA-05-4403	LUAD	76	MALE	[Not Available]	Stage IB	[Not Applicable]	Lung Adenocarcinoma	[Not Available]	2006	[Not Available]	-27881	Alive	#N/A	578	#N/A	[Not Available]	#N/A	#N/A	#N/A	#N/A	[Not Available]	#N/A	#N/A	0	578	0	578
TCGA-73-4670	TCGA-73-4670-01A-01R-1206-07	0	0.8227	0	0	0	10.9006	0	0	1.1234	0.2733	0.2733	0	0	0.5467	0	2.1867	1.3667	0	0.2733	10.9334	TCGA-73-4670	LUAD	69	FEMALE	WHITE	Stage IV	[Not Applicable]	Lung Adenocarcinoma	[Not Available]	2010	[Not Available]	-25526	Alive	WITH TUMOR	131	#N/A	[Not Available]	#N/A	#N/A	#N/A	#N/A	Stable Disease	#N/A	#N/A	0	131	0	131
TCGA-44-2656	TCGA-44-2656-01A-02R-0946-07	0	0	0	0	0	3.2895	0	0.775	0	0.271	0	0	0.5419	4.3355	0.271	0.5419	2.9806	0.271	2.1677	45.7933	TCGA-44-2656	LUAD	59	MALE	WHITE	Stage IB	[Not Applicable]	Lung Adenocarcinoma	[Not Available]	2009	[Not Available]	-21766	Alive	TUMOR FREE	1429	#N/A	[Not Available]	New Primary Tumor	#N/A	#N/A	568	Complete Remission/Response	#N/A	#N/A	0	1429	0	1429
TCGA-49-4501	TCGA-49-4501-01A-01R-1206-07	29.4055	0	0	0	0	15.7886	0	25.0832	0	0.2642	1.321	0.2642	0.7926	607.662	0	7.3976	4.4914	0.7926	12.4174	337.384	TCGA-49-4501	LUAD	67	FEMALE	WHITE	Stage IB	[Not Applicable]	Lung Adenocarcinoma	[Not Available]	1996	[Not Available]	-24817	Dead	WITH TUMOR	#N/A	1421	[Not Available]	#N/A	#N/A	#N/A	545	Complete Remission/Response	#N/A	#N/A	1	1421	1	1421
TCGA-86-8278	TCGA-86-8278-01A-11R-2287-07	0	0	0	0	0	3.477	0	2.2273	0	0.2593	0	0	0	4.4079	0	0.5186	3.1114	0	3.8893	98.7878	TCGA-86-8278	LUAD	63	FEMALE	WHITE	Stage IIB	[Not Applicable]	Lung Adenocarcinoma	[Not Available]	2011	[Not Available]	-23117	Alive	WITH TUMOR	944	#N/A	[Not Available]	#N/A	#N/A	#N/A	29	Complete Remission/Response	#N/A	#N/A	0	944	0	944
TCGA-73-4662	TCGA-73-4662-01A-01R-1206-07	0	0	0	0	0	2.1098	0	0	0	0.2344	0	0	1.9528	2.1098	0.4689	4.6885	0.9377	0	4.2197	230.44	TCGA-73-4662	LUAD	65	FEMALE	WHITE	Stage IA	[Not Applicable]	Lung Adenocarcinoma	[Not Available]	2007	[Not Available]	-23762	Alive	TUMOR FREE	2515	#N/A	[Not Available]	#N/A	#N/A	#N/A	21	Complete Remission/Response	#N/A	#N/A	0	2515	0	2515
TCGA-38-4630	TCGA-38-4630-01A-01R-1206-07	0	0	0	0	0	6.7693	0	0	2.094	0.2216	0	0.6647	0.2216	185.686	0	4.4316	134.279	97.2745	26.8114	707.512	TCGA-38-4630	LUAD	75	FEMALE	WHITE	Stage IB	[Not Applicable]	Lung Adenocarcinoma	[Not Available]	2000	[Not Available]	-27667	Dead	WITH TUMOR	#N/A	1073	[Not Available]	#N/A	#N/A	#N/A	524	Complete Remission/Response	#N/A	#N/A	1	1073	1	1073
TCGA-44-A4SS	TCGA-44-A4SS-01A-11R-A24X-07	16177.6	174.777	149.339	6.12	17.291	7291.64	157.43	3664.41	1217.74	0	48.1844	0.5538	1.1077	684.551	0.5538	103.015	97.4765	0.5538	0	829.105	TCGA-44-A4SS	LUAD	73	MALE	WHITE	Stage IA	[Not Applicable]	Lung Adenocarcinoma	[Not Available]	2012	[Not Available]	-26991	Alive	TUMOR FREE	415	#N/A	[Not Available]	#N/A	#N/A	#N/A	#N/A	Complete Remission/Response	#N/A	#N/A	0	415	0	415
TCGA-05-5715	TCGA-05-5715-01A-01R-1628-07	3181.03	4.0133	0	0	0	422.58	69.0455	2480.62	515.362	0	0	33.5741	3.904	2977.94	0	0	3.904	0	0.7808	396.643	TCGA-05-5715	LUAD	69	FEMALE	[Not Available]	Stage IB	[Not Applicable]	Lung Adenocarcinoma	[Not Available]	2010	[Not Available]	-25383	Alive	TUMOR FREE	62	#N/A	[Not Available]	#N/A	#N/A	#N/A	#N/A	[Not Available]	#N/A	#N/A	0	62	0	62
TCGA-93-A4JQ	TCGA-93-A4JQ-01A-11R-A24X-07	2636.29	38.0907	9.6382	4.0105	6.8832	324.507	5.5711	620.95	517.537	0	0	0.4359	0.8718	11.3339	0	2.1796	0.4359	0	5.667	227.986	TCGA-93-A4JQ	LUAD	49	MALE	WHITE	Stage IA	[Not Applicable]	Lung Adenocarcinoma	[Not Available]	2012	[Not Available]	-17951	Alive	TUMOR FREE	526	#N/A	[Not Available]	#N/A	#N/A	#N/A	#N/A	Complete Remission/Response	#N/A	#N/A	0	526	0	526
TCGA-50-6592	TCGA-50-6592-01A-11R-1755-07	2157.22	482.397	32.3933	1.0918	0.6465	7635.01	3.3866	14.4755	468.581	0	1.2844	0	0	7.7066	0	14.985	1.7126	0	139.575	233.766	TCGA-50-6592	LUAD	71	FEMALE	WHITE	Stage IB	[Not Applicable]	Lung Adenocarcinoma	[Not Available]	2007	[Not Available]	-26191	Dead	WITH TUMOR	#N/A	777	[Not Available]	#N/A	#N/A	#N/A	#N/A	Progressive Disease	#N/A	#N/A	1	777	1	777
TCGA-44-6146	TCGA-44-6146-01A-11R-1755-07	1329.66	23.3348	2.0984	1.1507	0	197.613	1.1913	11.3087	47.8069	0	1227.89	2.2563	0	5560.02	1.3538	1.3538	272.563	0	0.4513	1045.13	TCGA-44-6146	LUAD	64	MALE	WHITE	Stage IIB	[Not Applicable]	Lung Adenocarcinoma	[Not Available]	2010	[Not Available]	-23378	Alive	TUMOR FREE	728	#N/A	[Not Available]	Locoregional Recurrence	#N/A	#N/A	631	Complete Remission/Response	#N/A	#N/A	0	728	0	728
TCGA-78-7145	TCGA-78-7145-01A-11R-2039-07	1321	0	0	0	0	69.5918	0	25.7383	78.6115	0	0	0	0	1.7458	0	0	0.5819	0	0	124.531	TCGA-78-7145	LUAD	52	FEMALE	WHITE	Stage IV	[Not Applicable]	Lung Adenocarcinoma	[Not Available]	2000	[Not Available]	-19080	Dead	WITH TUMOR	#N/A	826	[Not Available]	#N/A	#N/A	#N/A	422	[Not Available]	#N/A	#N/A	1	826	1	826
TCGA-05-4422	TCGA-05-4422-01A-01R-1206-07	358.892	811.86	302.843	17.7108	2.4749	9215.87	2.5023	94.9315	357.297	0	122.679	0.9132	2.5388	919.635	0	11.5677	9.1324	0	5.7839	632.572	TCGA-05-4422	LUAD	68	MALE	[Not Available]	Stage IB	[Not Applicable]	Lung Adenocarcinoma	[Not Available]	2008	[Not Available]	-24837	Alive	#N/A	365	#N/A	[Not Available]	#N/A	#N/A	#N/A	#N/A	[Not Available]	#N/A	#N/A	0	365	0	365
TCGA-55-8505	TCGA-55-8505-01A-11R-2403-07	269.151	163.005	18.3147	1.6205	3.3294	9152.1	8.4148	4.779	212.516	0	47.142	8.8391	15.9104	215.675	2.3571	106.07	79.5522	1.1786	4.1249	7.6606	TCGA-55-8505	LUAD	62	MALE	WHITE	Stage IIIA	[Not Applicable]	Lung Adenocarcinoma	[Not Available]	2012	[Not Available]	-22676	Alive	TUMOR FREE	440	#N/A	[Not Available]	#N/A	#N/A	#N/A	#N/A	Complete Remission/Response	#N/A	#N/A	0	440	0	440
TCGA-69-7761	TCGA-69-7761-01A-11R-2170-07	195.877	16.9995	3.3243	0	0	299.12	1.4409	0	20.2051	0	214.787	1.0793	2.1587	555.316	0	0.5397	189.423	0	10.2536	2654.61	TCGA-69-7761	LUAD	84	MALE	WHITE	Stage IB	[Not Applicable]	Lung Adenocarcinoma	[Not Available]	2011	[Not Available]	-31041	Alive	TUMOR FREE	186	#N/A	[Not Available]	#N/A	#N/A	#N/A	#N/A	[Not Available]	#N/A	#N/A	0	186	0	186
TCGA-49-4490	TCGA-49-4490-01A-21R-1858-07	137.77	0	3.4634	0	0	451.905	0	25.8542	55.9206	0	0	0	0	55.2279	0	0	47.7394	0	1.8721	89.8624	TCGA-49-4490	LUAD	45	FEMALE	WHITE	Stage IIIA	[Not Applicable]	Lung Adenocarcinoma	[Not Available]	1993	[Not Available]	-16634	Dead	WITH TUMOR	#N/A	385	[Not Available]	#N/A	#N/A	#N/A	#N/A	[Not Available]	#N/A	#N/A	1	385	1	385
TCGA-55-7728	TCGA-55-7728-01A-11R-2187-07	135.558	37.018	12.0837	0	0	171.673	0	0	47.4458	0	5.5566	0.3704	2.2967	424.894	1.4818	0	86.6827	0.3704	0.3704	234.858	TCGA-55-7728	LUAD	64	FEMALE	WHITE	Stage IB	[Not Applicable]	Lung Adenocarcinoma	[Not Available]	2011	[Not Available]	-23505	Alive	TUMOR FREE	704	#N/A	[Not Available]	#N/A	#N/A	#N/A	#N/A	Complete Remission/Response	#N/A	#N/A	0	704	0	704
TCGA-55-8619	TCGA-55-8619-01A-11R-2403-07	133.087	25.9056	0	0	0	101.468	0	1.6657	5.7833	0	4.0769	0	0.5824	7.5713	0	0	9.3186	2.9121	0	502.621	TCGA-55-8619	LUAD	72	FEMALE	WHITE	Stage IIB	[Not Applicable]	Lung Adenocarcinoma	[Not Available]	2012	[Not Available]	-26616	Alive	TUMOR FREE	416	#N/A	[Not Available]	#N/A	#N/A	#N/A	#N/A	Complete Remission/Response	#N/A	#N/A	0	416	0	416
TCGA-49-AARN	TCGA-49-AARN-01A-21R-A41B-07	77.0746	4.0896	0	0	0	54.3806	0	1.5224	13.6791	0	35.0746	0	2.2388	76.1194	0	0	17.1642	0	1.4925	224.627	TCGA-49-AARN	LUAD	56	FEMALE	BLACK OR AFRICAN AMERICAN	Stage IA	[Not Applicable]	Lung Adenocarcinoma	[Not Available]	2000	[Not Available]	-20605	Dead	#N/A	#N/A	1135	[Not Available]	#N/A	#N/A	#N/A	#N/A	Complete Remission/Response	#N/A	#N/A	1	1135	#N/A	1135
TCGA-99-7458	TCGA-99-7458-01A-11R-2039-07	71.1247	12.583	0	0	0	391.817	20.8789	1975.14	151.976	0	0	0	0	0.9931	0	7.945	1.9863	3.9725	1.3242	416.122	TCGA-99-7458	LUAD	74	FEMALE	WHITE	Stage IIIA	[Not Applicable]	Lung Adenocarcinoma	[Not Available]	2010	[Not Available]	-27359	Alive	WITH TUMOR	747	#N/A	[Not Available]	#N/A	#N/A	#N/A	#N/A	Stable Disease	#N/A	#N/A	0	747	0	747
TCGA-55-6984	TCGA-55-6984-01A-11R-1949-07	50.3565	0	2.7788	0	0	108.373	0	2.6417	9.5247	0	0	0	0	21.0238	0	0.9141	59.415	0	0	515.539	TCGA-55-6984	LUAD	71	FEMALE	WHITE	Stage IIB	[Not Applicable]	Lung Adenocarcinoma	[Not Available]	2006	[Not Available]	#N/A	Dead	WITH TUMOR	#N/A	760	[Not Available]	#N/A	#N/A	#N/A	724	Complete Remission/Response	#N/A	#N/A	1	760	1	760
TCGA-67-3770	TCGA-67-3770-01A-01R-0946-07	46.1466	0	0	0	0	53.5338	0	4.6523	0	0	0	3.7594	6.5789	64.8496	0	30.0752	4.6992	0	15.0376	258.459	TCGA-67-3770	LUAD	70	FEMALE	WHITE	Stage IA	[Not Applicable]	Lung Adenocarcinoma	[Not Available]	2009	[Not Available]	-25658	Alive	TUMOR FREE	610	#N/A	[Not Available]	#N/A	#N/A	#N/A	#N/A	[Not Available]	#N/A	#N/A	0	610	0	610
TCGA-62-8394	TCGA-62-8394-01A-11R-2326-07	41.4513	5.4309	2.1208	0	0	194.428	2.7778	370.138	86.4289	0	0.4158	0.4158	0.8317	198.357	0	1.6634	3.7426	0.4158	17.0496	674.498	TCGA-62-8394	LUAD	65	FEMALE	WHITE	Stage IIIB	[Not Applicable]	Lung Adenocarcinoma	[Not Available]	2008	[Not Available]	-23758	Dead	TUMOR FREE	#N/A	139	[Not Available]	#N/A	#N/A	#N/A	#N/A	Complete Remission/Response	#N/A	#N/A	1	139	0	139
TCGA-97-8547	TCGA-97-8547-01A-11R-2403-07	35.6663	4.7494	0	0	2.3977	285.621	0	458.177	94.3211	0	0.766	0	3.0641	9.9584	0.766	0	6.1282	9.1923	6.8943	143.247	TCGA-97-8547	LUAD	78	FEMALE	[Not Evaluated]	Stage IIIA	[Not Applicable]	Lung Adenocarcinoma	[Not Available]	2012	[Not Available]	-28801	Alive	TUMOR FREE	657	#N/A	[Not Available]	#N/A	#N/A	#N/A	#N/A	Complete Remission/Response	#N/A	#N/A	0	657	0	657
TCGA-91-6836	TCGA-91-6836-01A-21R-1858-07	30.8072	6.7225	0.8072	0	0	116.793	0	0.7808	99.0516	0	0.4411	0.4411	0.8822	0.8822	0	11.4689	0.8822	0	3.5289	270.842	TCGA-91-6836	LUAD	52	FEMALE	WHITE	Stage IB	[Not Applicable]	Lung Adenocarcinoma	[Not Available]	2010	[Not Available]	-19216	Alive	TUMOR FREE	417	#N/A	[Not Available]	#N/A	#N/A	#N/A	#N/A	Complete Remission/Response	#N/A	#N/A	0	417	0	417
TCGA-55-6980	TCGA-55-6980-01A-11R-1949-07	30.1503	0	0	0	0	75.9505	0	0	0	0	0.8842	1.7683	0	7.9576	0	1.7683	16.7993	0	0	78.6914	TCGA-55-6980	LUAD	56	MALE	WHITE	Stage IA	[Not Applicable]	Lung Adenocarcinoma	[Not Available]	2006	[Not Available]	#N/A	Alive	TUMOR FREE	2109	#N/A	[Not Available]	#N/A	#N/A	#N/A	#N/A	Complete Remission/Response	#N/A	#N/A	0	2109	0	2109
TCGA-75-7027	TCGA-75-7027-01A-11R-1949-07	15.828	56.0944	84.751	2.3827	2.4435	6051.86	4.1199	6.2362	203.616	0	0	2.0266	2.5159	15.3445	0	28.3729	4.6323	0	0.2895	35.3214	TCGA-75-7027	LUAD	#N/A	MALE	[Not Available]	Stage IB	[Not Applicable]	Lung Adenocarcinoma	[Not Available]	#N/A	[Not Available]	#N/A	Alive	TUMOR FREE	3059	#N/A	[Not Available]	Locoregional Recurrence	#N/A	#N/A	2949	Complete Remission/Response	#N/A	#N/A	0	3059	0	3059
TCGA-95-8494	TCGA-95-8494-01A-11R-2326-07	14.5252	0	0	0	0	22.798	0	11.8228	17.1319	0	0.6373	0	1.2747	0	0	1.2747	5.0988	0	3.1867	94.9649	TCGA-95-8494	LUAD	67	MALE	WHITE	Stage IIA	[Not Applicable]	Lung Adenocarcinoma	[Not Available]	2012	[Not Available]	-24773	Alive	#N/A	84	#N/A	[Not Available]	#N/A	#N/A	#N/A	#N/A	Complete Remission/Response	#N/A	#N/A	0	84	0	84
TCGA-95-7043	TCGA-95-7043-01A-11R-1949-07	14.3445	24.3857	25.2009	3.0727	3.1511	13924.6	1.5912	0	865.546	0	0	0	0	6.2708	0	0.7839	0	0	1.5677	123.065	TCGA-95-7043	LUAD	63	FEMALE	WHITE	Stage IA	[Not Applicable]	Lung Adenocarcinoma	[Not Available]	2011	[Not Available]	-23165	Dead	WITH TUMOR	#N/A	503	[Not Available]	#N/A	#N/A	#N/A	#N/A	Complete Remission/Response	#N/A	#N/A	1	503	1	503
TCGA-55-A494	TCGA-55-A494-01A-11R-A24X-07	13.7471	0	0	0	0	0	0	0	0	0	0	0	0	8.4256	0	7.0953	1.3304	0	0	292.237	TCGA-55-A494	LUAD	61	FEMALE	WHITE	Stage IB	[Not Applicable]	Lung Adenocarcinoma	[Not Available]	2012	[Not Available]	-22540	Alive	TUMOR FREE	481	#N/A	[Not Available]	#N/A	#N/A	#N/A	#N/A	Complete Remission/Response	#N/A	#N/A	0	481	0	481
TCGA-44-A47A	TCGA-44-A47A-01A-21R-A24H-07	10.1126	0	0.8342	0	0	259.452	0.8393	0	0	0	0	0	6.1412	0.5118	0	0	1.5353	0.5118	4.0942	154.043	TCGA-44-A47A	LUAD	78	FEMALE	WHITE	Stage IB	[Not Applicable]	Lung Adenocarcinoma	[Not Available]	2012	[Not Available]	-28782	Alive	WITH TUMOR	466	#N/A	[Not Available]	Distant Metastasis	#N/A	#N/A	397	Complete Remission/Response	#N/A	#N/A	0	466	0	466
TCGA-55-8097	TCGA-55-8097-01A-11R-2241-07	8.8952	0	0	0	0	12.322	0	0	0	0	0.8007	0	0	14.4117	0	3.2026	0.8007	0	0	10.4085	TCGA-55-8097	LUAD	60	FEMALE	WHITE	Stage IA	[Not Applicable]	Lung Adenocarcinoma	[Not Available]	2012	[Not Available]	-22260	Alive	TUMOR FREE	476	#N/A	[Not Available]	#N/A	#N/A	#N/A	#N/A	Complete Remission/Response	#N/A	#N/A	0	476	0	476
TCGA-97-7941	TCGA-97-7941-01A-11R-2187-07	8.4068	12.9579	0.9672	0	0	1375.69	0	4.6061	77.8507	0	19.7312	0	0	61.7812	0	12.615	13.2619	0	0.6469	475.488	TCGA-97-7941	LUAD	72	FEMALE	WHITE	Stage IA	[Not Applicable]	Lung Adenocarcinoma	[Not Available]	2011	[Not Available]	-26298	Alive	TUMOR FREE	484	#N/A	[Not Available]	#N/A	#N/A	#N/A	#N/A	Complete Remission/Response	#N/A	#N/A	0	484	0	484
TCGA-91-7771	TCGA-91-7771-01A-11R-2170-07	7.2286	5.8914	5.96	0	0	61.16	0	0	4.9086	0	0.5714	0	0	334.857	0	6.2857	2.2857	426.286	2.2857	183.429	TCGA-91-7771	LUAD	62	MALE	WHITE	Stage IIB	[Not Applicable]	Lung Adenocarcinoma	[Not Available]	2011	[Not Available]	-22926	Alive	TUMOR FREE	492	#N/A	[Not Available]	#N/A	#N/A	#N/A	#N/A	Complete Remission/Response	#N/A	#N/A	0	492	0	492
TCGA-91-6840	TCGA-91-6840-01A-11R-1949-07	6.7544	3.6294	2.3304	0	0	18.6893	2.361	2.2158	6.8079	0	119.196	9.933	1.5282	832.843	0	0	8.4048	40.496	2.2922	3.0563	TCGA-91-6840	LUAD	59	FEMALE	WHITE	Stage IA	[Not Applicable]	Lung Adenocarcinoma	[Not Available]	2011	[Not Available]	-21854	Alive	TUMOR FREE	372	#N/A	[Not Available]	#N/A	#N/A	#N/A	#N/A	Complete Remission/Response	#N/A	#N/A	0	372	0	372
TCGA-55-7227	TCGA-55-7227-01A-11R-2039-07	6.6551	0	0	0	0	11.3131	0	0	0	0	0.6911	0	0	2.7643	0	1.3822	2.0733	0	2.7643	150.656	TCGA-55-7227	LUAD	77	MALE	WHITE	Stage IIIA	[Not Applicable]	Lung Adenocarcinoma	[Not Available]	2011	[Not Available]	-28458	Dead	WITH TUMOR	#N/A	952	[Not Available]	Locoregional Recurrence	#N/A	#N/A	255	Complete Remission/Response	#N/A	#N/A	1	952	1	952
TCGA-69-7760	TCGA-69-7760-01A-11R-2170-07	6.5584	0	0	0	0	5.559	0	1.624	0	0	0	0	2.4984	5.6215	0.6246	0.6246	9.9938	0	36.852	559.026	TCGA-69-7760	LUAD	73	MALE	WHITE	Stage IIB	[Not Applicable]	Lung Adenocarcinoma	[Not Available]	2011	[Not Available]	-26777	Alive	TUMOR FREE	202	#N/A	[Not Available]	#N/A	#N/A	#N/A	#N/A	[Not Available]	#N/A	#N/A	0	202	0	202
TCGA-53-A4EZ	TCGA-53-A4EZ-01A-12R-A24X-07	6.0746	53.8291	7.6207	1.3613	0	16430.3	0.8892	0	1016.23	0	0	0	0.3934	1.9671	0	11.016	0.3934	0	1.9671	8.6555	TCGA-53-A4EZ	LUAD	63	MALE	WHITE	Stage IIA	[Not Applicable]	Lung Adenocarcinoma	[Not Available]	2012	[Not Available]	-23201	Alive	TUMOR FREE	1071	#N/A	[Not Available]	#N/A	#N/A	#N/A	#N/A	Stable Disease	#N/A	#N/A	0	1071	0	1071
TCGA-55-6712	TCGA-55-6712-01A-11R-1858-07	6.0497	0	0	0	0	9.1866	0	0	0	0	0	0	0	0.8963	0	0	0	0	0.8963	25.0952	TCGA-55-6712	LUAD	71	MALE	WHITE	Stage IIA	[Not Applicable]	Lung Adenocarcinoma	[Not Available]	2010	[Not Available]	#N/A	Dead	WITH TUMOR	#N/A	171	[Not Available]	#N/A	#N/A	#N/A	#N/A	Progressive Disease	#N/A	#N/A	1	171	1	171
TCGA-55-7903	TCGA-55-7903-01A-11R-2170-07	5.7698	0	0	0	0	3.1988	0	0	0	0	0	0	0	0.9965	0	1.993	0.4983	0	0	162.93	TCGA-55-7903	LUAD	64	MALE	WHITE	Stage IA	[Not Applicable]	Lung Adenocarcinoma	[Not Available]	2011	[Not Available]	-23509	Alive	TUMOR FREE	567	#N/A	[Not Available]	#N/A	#N/A	#N/A	#N/A	Complete Remission/Response	#N/A	#N/A	0	567	0	567
TCGA-69-7763	TCGA-69-7763-01A-11R-2170-07	5.5505	0	0	0	0	5.8756	0	0	1.5723	0	0	0	0	2.3644	0	2.3644	0	0	0	20.6886	TCGA-69-7763	LUAD	69	MALE	WHITE	Stage IA	[Not Applicable]	Lung Adenocarcinoma	[Not Available]	2010	[Not Available]	-25316	Alive	#N/A	690	#N/A	[Not Available]	#N/A	#N/A	#N/A	#N/A	[Not Available]	#N/A	#N/A	0	690	0	690
TCGA-95-7944	TCGA-95-7944-01A-11R-2187-07	5.2526	28.7482	0	1.1933	0	38.448	1.2555	0	12.2182	0	3.6603	0	0.7321	0.366	0.366	0	1.4641	1.0981	4.0264	13.9092	TCGA-95-7944	LUAD	71	MALE	WHITE	Stage IA	[Not Applicable]	Lung Adenocarcinoma	[Not Available]	2011	[Not Available]	-26003	Alive	TUMOR FREE	377	#N/A	[Not Available]	#N/A	#N/A	#N/A	#N/A	Stable Disease	#N/A	#N/A	0	377	0	377
TCGA-62-A46V	TCGA-62-A46V-01A-11R-A24H-07	5.1663	0	0	0	0	2.7742	0	0	0	0	0.4963	0	0.4963	2.9777	0	0.4963	0.4963	0	0	177.667	TCGA-62-A46V	LUAD	78	FEMALE	WHITE	Stage IB	[Not Applicable]	Lung Adenocarcinoma	[Not Available]	2007	[Not Available]	-28495	Alive	TUMOR FREE	2199	#N/A	[Not Available]	#N/A	#N/A	#N/A	#N/A	Complete Remission/Response	#N/A	#N/A	0	2199	0	2199
TCGA-05-4417	TCGA-05-4417-01A-22R-1858-07	4.7526	0	4.6065	0	0	4.6192	0	0	0	0	0	0.6354	6.3538	2.5415	2.5415	22.8736	0	6.9892	1.2708	5.7184	TCGA-05-4417	LUAD	51	FEMALE	[Not Available]	Stage IB	[Not Applicable]	Lung Adenocarcinoma	[Not Available]	2008	[Not Available]	-18780	Alive	TUMOR FREE	455	#N/A	[Not Available]	#N/A	#N/A	#N/A	#N/A	Partial Remission/Response	#N/A	#N/A	0	455	0	455
TCGA-49-AARQ	TCGA-49-AARQ-01A-11R-A41B-07	4.3764	3.4551	6.5674	4.2416	0	10418.6	0	0	1412.72	0	0	0	0	1.1236	0	0	24.7191	0	11.7978	167.977	TCGA-49-AARQ	LUAD	41	FEMALE	BLACK OR AFRICAN AMERICAN	Stage I	[Not Applicable]	Lung Adenocarcinoma	[Not Available]	1996	[Not Available]	-15065	Alive	TUMOR FREE	6732	#N/A	[Not Available]	#N/A	#N/A	#N/A	#N/A	Complete Remission/Response	#N/A	#N/A	0	6732	0	6732
TCGA-44-6776	TCGA-44-6776-01A-11R-1858-07	4.0876	2.0833	0	0	0	2096.82	0	0	51.4655	0	0.7184	0	1.4368	37.3563	0.7184	3.592	1.4368	0	1.4368	63.2184	TCGA-44-6776	LUAD	60	FEMALE	WHITE	Stage IA	[Not Applicable]	Lung Adenocarcinoma	[Not Available]	2005	[Not Available]	-22150	Alive	TUMOR FREE	2616	#N/A	[Not Available]	#N/A	#N/A	#N/A	#N/A	Complete Remission/Response	#N/A	#N/A	0	2616	0	2616
TCGA-50-6597	TCGA-50-6597-01A-11R-1858-07	3.9491	0	0	0	0	46.0415	0	0	11.2724	0	0	0.9425	0	0.9425	0	1.885	16.9651	0	8.4826	53.7229	TCGA-50-6597	LUAD	79	FEMALE	WHITE	Stage IB	[Not Applicable]	Lung Adenocarcinoma	[Not Available]	2007	[Not Available]	-29195	Dead	TUMOR FREE	#N/A	1268	[Not Available]	#N/A	#N/A	#N/A	#N/A	Partial Remission/Response	#N/A	#N/A	1	1268	0	1268
TCGA-97-8177	TCGA-97-8177-01A-11R-2287-07	3.8324	0	0	0	0	45.5769	0	0	1.7617	0	1.3736	0	4.4437	33.9973	0.6868	9.9588	1.0302	0	4.4643	83.7912	TCGA-97-8177	LUAD	59	FEMALE	WHITE	Stage IB	[Not Applicable]	Lung Adenocarcinoma	[Not Available]	2012	[Not Available]	-21648	Alive	TUMOR FREE	499	#N/A	[Not Available]	#N/A	#N/A	#N/A	#N/A	[Not Evaluated]	#N/A	#N/A	0	499	0	499
TCGA-50-8457	TCGA-50-8457-01A-11R-2326-07	3.6795	0	0	0	1.2694	26.1207	0	0	0	0	0.4439	0	0.4439	7.5455	0	5.3262	0	0	1.3316	146.915	TCGA-50-8457	LUAD	63	FEMALE	BLACK OR AFRICAN AMERICAN	Stage IA	[Not Applicable]	Lung Adenocarcinoma	[Not Available]	2011	[Not Available]	-23055	Alive	TUMOR FREE	1125	#N/A	[Not Available]	#N/A	#N/A	#N/A	#N/A	Complete Remission/Response	#N/A	#N/A	0	1125	0	1125
TCGA-55-6971	TCGA-55-6971-01A-11R-1949-07	3.5624	2.3427	0	0	0	86.1762	0	1.636	10.8228	0	0	0.9681	33.8141	0	8.7125	54.211	0.9681	5.8083	13.5528	367.861	TCGA-55-6971	LUAD	59	FEMALE	WHITE	Stage IB	[Not Applicable]	Lung Adenocarcinoma	[Not Available]	2010	[Not Available]	-21734	Alive	TUMOR FREE	1400	#N/A	[Not Available]	#N/A	#N/A	#N/A	#N/A	Complete Remission/Response	#N/A	#N/A	0	1400	0	1400
TCGA-50-5066	TCGA-50-5066-01A-01R-1628-07	3.1446	4.399	2.2125	0	0	946.516	0	0	49.8258	0	0	1.7422	0	8.7108	0	13.9373	8.7108	0	0.8711	147.213	TCGA-50-5066	LUAD	72	MALE	BLACK OR AFRICAN AMERICAN	Stage IB	[Not Applicable]	Lung Adenocarcinoma	[Not Available]	2009	[Not Available]	-26385	Alive	TUMOR FREE	1442	#N/A	[Not Available]	Distant Metastasis	#N/A	#N/A	477	Complete Remission/Response	#N/A	#N/A	0	1442	0	1442
TCGA-67-6215	TCGA-67-6215-01A-11R-1755-07	3.0166	1.0204	0	0	0	109.727	14.6474	83.4342	11.2323	0	0	0	0	0	0	1.4897	0.7448	0	0	676.322	TCGA-67-6215	LUAD	52	FEMALE	WHITE	Stage IB	[Not Applicable]	Lung Adenocarcinoma	[Not Available]	2010	[Not Available]	-19310	Alive	TUMOR FREE	174	#N/A	[Not Available]	#N/A	#N/A	#N/A	#N/A	Complete Remission/Response	#N/A	#N/A	0	174	0	174
TCGA-62-A472	TCGA-62-A472-01A-11R-A24H-07	2.9344	0	0	0	0	3.8224	0	0	0	0	0.9653	0	0	0	0	0	0.9653	0	0	90.7336	TCGA-62-A472	LUAD	70	MALE	WHITE	Stage IIB	[Not Applicable]	Lung Adenocarcinoma	[Not Available]	2011	[Not Available]	-25893	Alive	WITH TUMOR	910	#N/A	[Not Available]	Locoregional Recurrence	#N/A	#N/A	290	Complete Remission/Response	#N/A	#N/A	0	910	0	910
TCGA-38-4632	TCGA-38-4632-01A-01R-1755-07	2.9134	0	0	0	0	242.768	0	1.277	16.0887	0	0	0	0	0	0	1.5293	1.5293	1.5293	0	204.167	TCGA-38-4632	LUAD	42	MALE	BLACK OR AFRICAN AMERICAN	Stage IV	[Not Applicable]	Lung Adenocarcinoma	[Not Available]	1998	[Not Available]	-15418	Dead	WITH TUMOR	#N/A	1357	[Not Available]	#N/A	#N/A	#N/A	680	Complete Remission/Response	#N/A	#N/A	1	1357	1	1357
TCGA-55-8299	TCGA-55-8299-01A-11R-2287-07	2.8552	0	0	0	0	4.7474	0	0	0	0	0	0	0	1.6895	0	8.8697	0.4224	0	0.8447	42.6588	TCGA-55-8299	LUAD	61	FEMALE	WHITE	Stage IA	[Not Applicable]	Lung Adenocarcinoma	[Not Available]	2012	[Not Available]	-22626	Dead	WITH TUMOR	#N/A	469	[Not Available]	Distant Metastasis	#N/A	#N/A	274	Complete Remission/Response	#N/A	#N/A	1	469	1	469
TCGA-55-7816	TCGA-55-7816-01A-11R-2170-07	2.6796	4.5247	0	0	0	0.9634	0	1.2946	0	0	0	0	0.8602	1.2903	0	3.4409	0.4301	0	3.4409	1.2903	TCGA-55-7816	LUAD	49	FEMALE	WHITE	Stage IV	[Not Applicable]	Lung Adenocarcinoma	[Not Available]	2011	[Not Available]	-18170	Dead	WITH TUMOR	#N/A	468	[Not Available]	#N/A	#N/A	#N/A	#N/A	Progressive Disease	#N/A	#N/A	1	468	1	468
TCGA-97-8171	TCGA-97-8171-01A-11R-2287-07	2.5137	0	0	0	0	34.5598	0	0	0	0	6.7406	0	0.2809	4.2129	0	43.2524	0.8426	0	0.5617	421.289	TCGA-97-8171	LUAD	81	MALE	ASIAN	Stage IV	[Not Applicable]	Lung Adenocarcinoma	[Not Available]	2011	[Not Available]	-29627	Alive	WITH TUMOR	568	#N/A	[Not Available]	Distant Metastasis	#N/A	#N/A	441	Progressive Disease	#N/A	#N/A	0	568	0	568
TCGA-69-A59K	TCGA-69-A59K-01A-11R-A262-07	2.4293	107.522	32.0357	7.8352	2.4231	3542.33	0	0	224.852	0	0	0	0	0.615	0	0.615	1.23	0	19.0652	200.492	TCGA-69-A59K	LUAD	60	FEMALE	BLACK OR AFRICAN AMERICAN	Stage IIB	[Not Applicable]	Lung Adenocarcinoma	[Not Available]	2012	[Not Available]	-22093	Alive	TUMOR FREE	591	#N/A	[Not Available]	#N/A	#N/A	#N/A	#N/A	Stable Disease	#N/A	#N/A	0	591	0	591
TCGA-97-7937	TCGA-97-7937-01A-11R-2170-07	2.3303	0	0	0	0	1.2857	0	0	0	0	0	0	0.8035	2.0088	0	0.4018	0	0.4018	0	0.4018	TCGA-97-7937	LUAD	65	MALE	WHITE	Stage IB	[Not Applicable]	Lung Adenocarcinoma	[Not Available]	2011	[Not Available]	-23919	Alive	TUMOR FREE	564	#N/A	[Not Available]	#N/A	#N/A	#N/A	#N/A	Stable Disease	#N/A	#N/A	0	564	0	564
TCGA-78-7535	TCGA-78-7535-01A-11R-2066-07	2.3064	0	0	0	0	3.5219	0	0	7.6763	0	0.3554	0.3554	0	1.4215	0	2.4877	3.9092	0	0.7108	0.3554	TCGA-78-7535	LUAD	45	MALE	WHITE	Stage IB	[Not Applicable]	Lung Adenocarcinoma	[Not Available]	2000	[Not Available]	-16571	Dead	WITH TUMOR	#N/A	949	[Not Available]	#N/A	#N/A	#N/A	809	Stable Disease	#N/A	#N/A	1	949	1	949
TCGA-05-4405	TCGA-05-4405-01A-21R-1858-07	2.2596	0	0	0	0	9.0515	0	1.9415	0	0	0	0	0	0.6626	0	7.2889	1.9879	0	0	5.9637	TCGA-05-4405	LUAD	74	FEMALE	[Not Available]	Stage IB	[Not Applicable]	Lung Adenocarcinoma	[Not Available]	2006	[Not Available]	-27241	Alive	TUMOR FREE	610	#N/A	[Not Available]	#N/A	#N/A	#N/A	#N/A	[Not Applicable]	#N/A	#N/A	0	610	0	610
TCGA-75-6212	TCGA-75-6212-01A-11R-1755-07	2.0499	0	0	0	0	15.0979	0	0	0	0	0	0	0	7.015	0	0	79.5036	0	0.7794	282.94	TCGA-75-6212	LUAD	#N/A	FEMALE	[Not Available]	Stage IIB	[Not Applicable]	Lung Adenocarcinoma	[Not Available]	#N/A	[Not Available]	#N/A	Dead	WITH TUMOR	#N/A	1516	[Not Available]	New Primary Tumor	#N/A	#N/A	1340	Complete Remission/Response	#N/A	#N/A	1	1516	1	1516
TCGA-NJ-A7XG	TCGA-NJ-A7XG-01A-12R-A39D-07	1.9828	0	0	0	0	15.0612	0	5.8523	0	0	0	0	4.5793	27.9336	1.3738	1.3738	2.2896	0	0	154.78	TCGA-NJ-A7XG	LUAD	49	MALE	BLACK OR AFRICAN AMERICAN	Stage IIIA	[Not Applicable]	Lung Adenocarcinoma	[Not Available]	2013	[Not Available]	-18127	Alive	WITH TUMOR	617	#N/A	[Not Available]	#N/A	#N/A	#N/A	#N/A	Stable Disease	#N/A	#N/A	0	617	0	617
TCGA-55-8302	TCGA-55-8302-01A-11R-2326-07	1.7721	0	0	0	0	3.212	0	0	0	0	0	0.5538	0.5538	0.5538	0	1.6614	2.7689	0	1.1076	263.602	TCGA-55-8302	LUAD	54	MALE	WHITE	Stage IB	[Not Applicable]	Lung Adenocarcinoma	[Not Available]	2012	[Not Available]	-20011	Alive	TUMOR FREE	478	#N/A	[Not Available]	#N/A	#N/A	#N/A	#N/A	Complete Remission/Response	#N/A	#N/A	0	478	0	478
TCGA-99-8033	TCGA-99-8033-01A-11R-2241-07	1.7383	81.0742	24.2539	4.5	1.8438	7993.45	0	0	381.027	0	0	0	0	0	0	3.9062	0.3906	0	2.3438	17.5781	TCGA-99-8033	LUAD	74	FEMALE	WHITE	Stage IV	[Not Applicable]	Lung Adenocarcinoma	[Not Available]	2011	[Not Available]	-27342	Dead	WITH TUMOR	#N/A	656	[Not Available]	#N/A	#N/A	#N/A	#N/A	Progressive Disease	#N/A	#N/A	1	656	1	656
TCGA-95-7948	TCGA-95-7948-01A-11R-2187-07	1.6645	3.3717	0	0	0	70.2895	0	0	0	0	10.8553	0	0.3289	46.7105	0	1.6447	8.8816	0	2.9605	2.9605	TCGA-95-7948	LUAD	42	FEMALE	WHITE	Stage IB	[Not Applicable]	Lung Adenocarcinoma	[Not Available]	2011	[Not Available]	-15363	Alive	TUMOR FREE	476	#N/A	[Not Available]	#N/A	#N/A	#N/A	#N/A	Complete Remission/Response	#N/A	#N/A	0	476	0	476
TCGA-97-A4M1	TCGA-97-A4M1-01A-11R-A24X-07	1.5467	0	0	0	0	5.5164	0	0	4.1997	0	0	0	0	204.112	0	17.1317	0.4895	0	4.4053	33.2844	TCGA-97-A4M1	LUAD	52	FEMALE	WHITE	Stage IA	[Not Applicable]	Lung Adenocarcinoma	[Not Available]	2012	[Not Available]	-19272	Alive	TUMOR FREE	601	#N/A	[Not Available]	#N/A	#N/A	#N/A	#N/A	Complete Remission/Response	#N/A	#N/A	0	601	0	601
TCGA-78-7162	TCGA-78-7162-01A-21R-2066-07	1.5075	3.0187	3.6334	0	0	3449.79	0	0	182.375	0	0	0	0	1.0977	0	7.318	0.7318	0	1.0977	47.2009	TCGA-78-7162	LUAD	75	MALE	WHITE	Stage IA	[Not Applicable]	Lung Adenocarcinoma	[Not Available]	1991	[Not Available]	-27593	Dead	#N/A	#N/A	3169	[Not Available]	#N/A	#N/A	#N/A	2218	[Not Available]	#N/A	#N/A	1	3169	#N/A	3169
TCGA-55-8507	TCGA-55-8507-01A-11R-2403-07	1.434	0	0	0	0	5.0595	0	0	0	0	1.0823	0.5411	0	0.5411	0.5411	8.658	0	2114.18	88.2035	152.056	TCGA-55-8507	LUAD	53	MALE	WHITE	Stage IA	[Not Applicable]	Lung Adenocarcinoma	[Not Available]	2012	[Not Available]	-19390	Alive	TUMOR FREE	418	#N/A	[Not Available]	#N/A	#N/A	#N/A	#N/A	Complete Remission/Response	#N/A	#N/A	0	418	0	418
TCGA-50-5944	TCGA-50-5944-01A-11R-1755-07	1.3966	0	0	0	0	13.2398	0	0	0	0	0	0.6098	0	6.0985	0	6.0985	4.2689	0.6098	12.197	151.852	TCGA-50-5944	LUAD	69	FEMALE	WHITE	Stage IA	[Not Applicable]	Lung Adenocarcinoma	[Not Available]	2010	[Not Available]	-25440	Alive	TUMOR FREE	1750	#N/A	[Not Available]	#N/A	#N/A	#N/A	#N/A	Complete Remission/Response	#N/A	#N/A	0	1750	0	1750
TCGA-67-6217	TCGA-67-6217-01A-11R-1755-07	1.2281	0	0	0	0	2.297	0	0	5.5777	0	0	0.5686	1.1371	6.2542	0.5686	2.8428	0	0	1.7057	90.9709	TCGA-67-6217	LUAD	73	FEMALE	WHITE	Stage IIA	[Not Applicable]	Lung Adenocarcinoma	[Not Available]	2010	[Not Available]	-26920	Alive	WITH TUMOR	422	#N/A	[Not Available]	#N/A	#N/A	#N/A	296	Progressive Disease	#N/A	#N/A	0	422	0	422
TCGA-67-6216	TCGA-67-6216-01A-11R-1755-07	1.1787	0	0	0	0	0	0	0	0	0	0	0	0	3.5362	0	0	1.1787	0	1.1787	263.445	TCGA-67-6216	LUAD	57	FEMALE	WHITE	Stage IA	[Not Applicable]	Lung Adenocarcinoma	[Not Available]	2010	[Not Available]	-20967	Alive	TUMOR FREE	141	#N/A	[Not Available]	#N/A	#N/A	#N/A	#N/A	Complete Remission/Response	#N/A	#N/A	0	141	0	141
TCGA-44-3919	TCGA-44-3919-01A-02R-1107-07	1.0569	0	0	0	0	4.7935	0	9.4374	0	0	0	2.2764	10.4065	10.7317	1.3008	2.9268	6.8293	0.3252	7.1545	130.732	TCGA-44-3919	LUAD	71	FEMALE	WHITE	Stage IA	[Not Applicable]	Lung Adenocarcinoma	[Not Available]	2010	[Not Available]	-26081	Dead	WITH TUMOR	#N/A	1026	[Not Available]	Locoregional Recurrence	#N/A	#N/A	921	Complete Remission/Response	#N/A	#N/A	1	1026	1	1026
TCGA-L9-A8F4	TCGA-L9-A8F4-01A-11R-A39D-07	0.9495	0	0	0	0	1.8111	0	0	1.8403	0	0	0.4183	0	2.5096	0	2.5096	0	0	1.673	30.9513	TCGA-L9-A8F4	LUAD	64	FEMALE	BLACK OR AFRICAN AMERICAN	Stage IB	[Not Applicable]	Lung Adenocarcinoma	[Not Available]	2013	[Not Available]	-23617	Alive	TUMOR FREE	476	#N/A	[Not Available]	#N/A	#N/A	#N/A	#N/A	[Not Applicable]	#N/A	#N/A	0	476	0	476
TCGA-44-2659	TCGA-44-2659-01A-01R-0946-07	0.9023	0	0	0	0	3.0827	0	0	4.1876	0	0.3269	0	0.6538	1.9614	0.3269	2.9421	3.269	0.3269	39.8823	367.44	TCGA-44-2659	LUAD	65	FEMALE	WHITE	Stage IIB	[Not Applicable]	Lung Adenocarcinoma	[Not Available]	2009	[Not Available]	-23808	Alive	TUMOR FREE	1367	#N/A	[Not Available]	Locoregional Recurrence	#N/A	#N/A	1146	Complete Remission/Response	#N/A	#N/A	0	1367	0	1367
TCGA-49-4486	TCGA-49-4486-01A-01R-1206-07	0.8611	0	0	0	0	3.7505	0	1.7057	0	0	0	0	0.3325	3.6574	0	0.3325	0	0	0.665	27.2642	TCGA-49-4486	LUAD	72	MALE	WHITE	Stage IA	[Not Applicable]	Lung Adenocarcinoma	[Not Available]	1992	[Not Available]	-26415	Dead	WITH TUMOR	#N/A	2318	[Not Available]	Distant Metastasis	#N/A	#N/A	2045	Complete Remission/Response	#N/A	#N/A	1	2318	1	2318
TCGA-97-8172	TCGA-97-8172-01A-11R-2287-07	0.5504	0	0	0	0	1.5666	0	0	0	0	0	4.4985	12.5906	72.7706	2.3816	13.7603	2.3816	0.2646	2.3816	88.6478	TCGA-97-8172	LUAD	75	FEMALE	WHITE	Stage IB	[Not Applicable]	Lung Adenocarcinoma	[Not Available]	2011	[Not Available]	-27416	Alive	TUMOR FREE	545	#N/A	[Not Available]	#N/A	#N/A	#N/A	#N/A	Complete Remission/Response	#N/A	#N/A	0	545	0	545
TCGA-55-1595	TCGA-55-1595-01A-01R-0946-07	0.3052	0	0	0	0	0	0	0	0	0	0	0	7.3248	0.9156	0.3052	63.1764	1.2208	0.6104	0.3052	38.7604	TCGA-55-1595	LUAD	74	FEMALE	ASIAN	Stage IA	[Not Applicable]	Lung Adenocarcinoma	[Not Available]	2004	[Not Available]	#N/A	Alive	TUMOR FREE	1479	#N/A	[Not Available]	#N/A	#N/A	#N/A	#N/A	Complete Remission/Response	#N/A	#N/A	0	1479	0	1479
TCGA-69-7973	TCGA-69-7973-01A-11R-2187-07	0.258	0	0	0	0	0	0	0	0	0	0	0	0	1.8061	0	3.3542	1.8061	200.475	266.526	91.5943	TCGA-69-7973	LUAD	42	FEMALE	WHITE	Stage IB	[Not Applicable]	Lung Adenocarcinoma	[Not Available]	2011	[Not Available]	-15355	Alive	TUMOR FREE	230	#N/A	[Not Available]	#N/A	#N/A	#N/A	#N/A	Complete Remission/Response	#N/A	#N/A	0	230	0	230
TCGA-05-5428	TCGA-05-5428-01A-01R-1628-07	0	160.392	3.8544	7.8047	1.2819	13585.8	0	0	1486.55	0	0	0	0	0	0	1.7441	0	0	0	14.8245	TCGA-05-5428	LUAD	57	MALE	[Not Available]	Stage IIA	[Not Applicable]	Lung Adenocarcinoma	[Not Available]	2010	[Not Available]	-21061	Alive	TUMOR FREE	670	#N/A	[Not Available]	#N/A	#N/A	#N/A	#N/A	Complete Remission/Response	#N/A	#N/A	0	670	0	670
TCGA-78-7154	TCGA-78-7154-01A-11R-2039-07	0	105.266	54.5974	5.8461	0.9942	20781.6	0	7.7035	1009.72	0	0.5953	10.1206	1.786	32.743	0	7.7392	1.1907	0	0.5953	504.242	TCGA-78-7154	LUAD	72	MALE	WHITE	Stage IIIA	[Not Applicable]	Lung Adenocarcinoma	[Not Available]	2003	[Not Available]	-26481	Dead	#N/A	#N/A	593	[Not Available]	#N/A	#N/A	#N/A	#N/A	[Not Available]	#N/A	#N/A	1	593	#N/A	593
TCGA-44-A47G	TCGA-44-A47G-01A-21R-A24H-07	0	46.7204	0	2.7906	1.8239	10482.8	0	8.5788	587.307	0	0	0	0.5754	1.7261	0	1.7261	0.5754	0	1.1507	225.547	TCGA-44-A47G	LUAD	73	FEMALE	WHITE	Stage IA	[Not Applicable]	Lung Adenocarcinoma	[Not Available]	2012	[Not Available]	-26800	Alive	TUMOR FREE	351	#N/A	[Not Available]	#N/A	#N/A	#N/A	#N/A	Complete Remission/Response	#N/A	#N/A	0	351	0	351
TCGA-55-A48Y	TCGA-55-A48Y-01A-11R-A24H-07	0	40.9034	94.9947	3.2721	0	7482.51	0	0	424.538	0	0	0	0	6.8277	0.5252	8.9286	1.0504	0	0	5.7773	TCGA-55-A48Y	LUAD	69	MALE	WHITE	Stage IIA	[Not Applicable]	Lung Adenocarcinoma	[Not Available]	2012	[Not Available]	-25384	Alive	TUMOR FREE	630	#N/A	[Not Available]	#N/A	#N/A	#N/A	#N/A	Complete Remission/Response	#N/A	#N/A	0	630	0	630
TCGA-50-5051	TCGA-50-5051-01A-21R-1858-07	0	24.2912	5.0736	4.9187	0	5712.29	0	0	412.998	0	0	0	20.914	15.4919	1.5492	18.5902	3.0984	0	0	206.042	TCGA-50-5051	LUAD	42	FEMALE	WHITE	Stage IIIA	[Not Applicable]	Lung Adenocarcinoma	[Not Available]	2007	[Not Available]	-15585	Dead	WITH TUMOR	#N/A	478	[Not Available]	Distant Metastasis	#N/A	#N/A	184	Progressive Disease	#N/A	#N/A	1	478	1	478
TCGA-44-2655	TCGA-44-2655-01A-01R-0946-07	0	6.2851	5.5134	1.3751	0.707	7329.47	0	0.3833	370.113	0	0	0	0.259	1.5538	0.5179	7.51	1.8128	0	0	65.7775	TCGA-44-2655	LUAD	65	FEMALE	WHITE	Stage IA	[Not Applicable]	Lung Adenocarcinoma	[Not Available]	2009	[Not Available]	-23854	Alive	TUMOR FREE	1324	#N/A	[Not Available]	New Primary Tumor	#N/A	#N/A	1009	Complete Remission/Response	#N/A	#N/A	0	1324	0	1324
TCGA-55-6987	TCGA-55-6987-01A-11R-1949-07	0	29.209	2.7719	0.678	0	3344.75	0	0	221.458	0	3.8842	0	0.7062	16.596	0	1.0593	28.9548	3.8842	1.0593	385.24	TCGA-55-6987	LUAD	77	MALE	WHITE	Stage IA	[Not Applicable]	Lung Adenocarcinoma	[Not Available]	2006	[Not Available]	-28382	Alive	TUMOR FREE	2137	#N/A	[Not Available]	#N/A	#N/A	#N/A	#N/A	Complete Remission/Response	#N/A	#N/A	0	2137	0	2137
TCGA-67-3771	TCGA-67-3771-01A-01R-0946-07	0	6.645	9.57	0	1.0619	2192.46	0	0	216.984	0	0	0	0	3.9088	0	0.6515	0.6515	0	9.772	104.234	TCGA-67-3771	LUAD	77	FEMALE	BLACK OR AFRICAN AMERICAN	Stage IA	[Not Applicable]	Lung Adenocarcinoma	[Not Available]	2009	[Not Available]	-28406	Alive	TUMOR FREE	610	#N/A	[Not Available]	#N/A	#N/A	#N/A	#N/A	[Not Available]	#N/A	#N/A	0	610	0	610
TCGA-44-6145	TCGA-44-6145-01A-11R-1755-07	0	18.4334	28.7618	3.3102	0	7365.35	1.7056	0	200.253	0	2.5268	0	1.2634	1.8951	1.8951	4.422	38.5344	0	0	200.253	TCGA-44-6145	LUAD	62	FEMALE	WHITE	Stage IA	[Not Applicable]	Lung Adenocarcinoma	[Not Available]	2011	[Not Available]	-22745	Alive	TUMOR FREE	595	#N/A	[Not Available]	#N/A	#N/A	#N/A	#N/A	Complete Remission/Response	#N/A	#N/A	0	595	0	595
TCGA-86-7711	TCGA-86-7711-01A-11R-2066-07	0	82.8428	12.5721	2.8458	1.4509	5125.55	0	0	195.282	0	0.5886	0	0	0	0	1.1772	4.1201	0.2943	2.06	148.028	TCGA-86-7711	LUAD	70	MALE	WHITE	Stage IIA	[Not Applicable]	Lung Adenocarcinoma	[Not Available]	2011	[Not Available]	-25719	Dead	WITH TUMOR	#N/A	1046	[Not Available]	#N/A	#N/A	#N/A	#N/A	Progressive Disease	#N/A	#N/A	1	1046	1	1046
TCGA-78-7167	TCGA-78-7167-01A-11R-2066-07	0	52.0208	5.055	6.5557	1.685	4035.04	0	0	191.474	0	0	0	0	2.0802	0	0.5944	0	0	0.5944	10.9955	TCGA-78-7167	LUAD	77	MALE	WHITE	Stage IV	[Not Applicable]	Lung Adenocarcinoma	[Not Available]	2002	[Not Available]	-28295	Dead	WITH TUMOR	#N/A	2681	[Not Available]	#N/A	#N/A	#N/A	726	[Not Available]	#N/A	#N/A	1	2681	1	2681
TCGA-78-7146	TCGA-78-7146-01A-11R-2039-07	0	42.7512	2.408	1.5821	0	2824.28	0	0	157.831	0	0	0	0	0	0	0.4975	0	0.4975	14.9254	100.995	TCGA-78-7146	LUAD	71	FEMALE	WHITE	Stage IIIA	[Not Applicable]	Lung Adenocarcinoma	[Not Available]	1999	[Not Available]	-26272	Dead	#N/A	#N/A	173	[Not Available]	#N/A	#N/A	#N/A	#N/A	[Not Available]	#N/A	#N/A	1	173	#N/A	173
TCGA-62-A46U	TCGA-62-A46U-01A-11R-A24H-07	0	14.4801	2.2565	0	2.2565	2410.88	0	0	150.485	0	0	0	0	0.822	0	0	0.822	0	14.7965	295.109	TCGA-62-A46U	LUAD	71	FEMALE	WHITE	Stage IIB	[Not Applicable]	Lung Adenocarcinoma	[Not Available]	2007	[Not Available]	-25998	Alive	TUMOR FREE	2067	#N/A	[Not Available]	#N/A	#N/A	#N/A	#N/A	Complete Remission/Response	#N/A	#N/A	0	2067	0	2067
TCGA-73-4659	TCGA-73-4659-01A-01R-1206-07	0	10.2215	10.557	0	1.0105	3258.46	0	0	135.576	0	0	0	0	0.8439	0	0.211	4.4304	0	1.0549	182.489	TCGA-73-4659	LUAD	66	MALE	WHITE	Stage IIIA	[Not Applicable]	Lung Adenocarcinoma	[Not Available]	2006	[Not Available]	-24253	Dead	WITH TUMOR	711	711	[Not Available]	#N/A	#N/A	#N/A	35	Progressive Disease	#N/A	#N/A	1	711	1	711
TCGA-50-5939	TCGA-50-5939-01A-11R-1628-07	0	8.0246	1.7787	0	0	2289.46	0	0	114.281	0	0	0	0	3.4206	0	2.0523	2.0523	0	2.7364	15.0505	TCGA-50-5939	LUAD	85	MALE	WHITE	Stage IB	[Not Applicable]	Lung Adenocarcinoma	[Not Available]	2008	[Not Available]	-31236	Dead	TUMOR FREE	#N/A	460	[Not Available]	#N/A	#N/A	#N/A	#N/A	Complete Remission/Response	#N/A	#N/A	1	460	0	460
TCGA-78-7148	TCGA-78-7148-01A-11R-2039-07	0	79.5001	118.57	5.7006	1.4624	1994.15	0	0	111.699	0	2.1271	1.5953	54.6663	48.9232	26.5887	164.85	10.6355	0	0	94.1239	TCGA-78-7148	LUAD	71	MALE	WHITE	Stage IIB	[Not Applicable]	Lung Adenocarcinoma	[Not Available]	2001	[Not Available]	-25990	Dead	#N/A	#N/A	626	[Not Available]	#N/A	#N/A	#N/A	182	[Not Available]	#N/A	#N/A	1	626	#N/A	626
TCGA-MP-A4TD	TCGA-MP-A4TD-01A-32R-A262-07	0	5.929	0	5.8255	0	2707.77	0	0	108.965	0	0	0	5.4214	67.5209	0	41.3997	5.4214	218.334	2.4643	58.6496	TCGA-MP-A4TD	LUAD	71	MALE	WHITE	Stage IIIA	[Not Applicable]	Lung Adenocarcinoma	[Not Available]	2008	[Not Available]	-25983	Dead	#N/A	#N/A	307	[Not Available]	Locoregional Recurrence	#N/A	#N/A	226	Complete Remission/Response	#N/A	#N/A	1	307	#N/A	307
TCGA-44-2657	TCGA-44-2657-01A-01R-1107-07	0	2.5034	1.7248	1.0805	0	1070.64	1.1007	0	108.181	0	0	0	0	46.3087	0	6.0403	0	0	16.1074	61.0738	TCGA-44-2657	LUAD	74	FEMALE	WHITE	Stage IB	[Not Applicable]	Lung Adenocarcinoma	[Not Available]	2009	[Not Available]	-27298	Alive	TUMOR FREE	1351	#N/A	[Not Available]	#N/A	#N/A	#N/A	#N/A	Complete Remission/Response	#N/A	#N/A	0	1351	0	1351
TCGA-80-5611	TCGA-80-5611-01A-01R-1628-07	0	1.5719	0	0	0	943.194	0	0	89.2363	0	0	1.6722	0	2.2297	0	0	220.736	0	21.7391	258.64	TCGA-80-5611	LUAD	#N/A	MALE	[Not Available]	Stage IB	[Not Applicable]	Lung Adenocarcinoma	[Not Available]	#N/A	[Not Available]	#N/A	Alive	TUMOR FREE	2595	#N/A	[Not Available]	#N/A	#N/A	#N/A	#N/A	Complete Remission/Response	#N/A	#N/A	0	2595	0	2595
TCGA-78-7160	TCGA-78-7160-01A-11R-2039-07	0	21.5142	35.4259	1.0221	0	2482.91	0	0	66.0631	0	2.5237	0	4.4164	11.9874	1.8927	66.877	11.3565	0	0.6309	32.8076	TCGA-78-7160	LUAD	61	MALE	WHITE	Stage IV	[Not Applicable]	Lung Adenocarcinoma	[Not Available]	2008	[Not Available]	-22385	Dead	#N/A	#N/A	697	[Not Available]	#N/A	#N/A	#N/A	#N/A	Complete Remission/Response	#N/A	#N/A	1	697	#N/A	697
TCGA-97-A4M6	TCGA-97-A4M6-01A-11R-A24X-07	0	2.9103	0	0	0	927.415	0	0	56.9914	0	0	0	0	12.7927	0	1.3706	0	0.4569	5.4826	179.554	TCGA-97-A4M6	LUAD	45	FEMALE	WHITE	Stage IA	[Not Applicable]	Lung Adenocarcinoma	[Not Available]	2012	[Not Available]	-16764	Alive	TUMOR FREE	568	#N/A	[Not Available]	#N/A	#N/A	#N/A	#N/A	Complete Remission/Response	#N/A	#N/A	0	568	0	568
TCGA-55-A492	TCGA-55-A492-01A-11R-A24H-07	0	0	0	0	0	722.582	0	0	51.9229	0	0	0	0.5356	28.3878	0.5356	0.5356	3.7493	0	0	11.7836	TCGA-55-A492	LUAD	70	FEMALE	WHITE	Stage IA	[Not Applicable]	Lung Adenocarcinoma	[Not Available]	2012	[Not Available]	-25719	Alive	TUMOR FREE	596	#N/A	[Not Available]	#N/A	#N/A	#N/A	#N/A	Complete Remission/Response	#N/A	#N/A	0	596	0	596
TCGA-55-7726	TCGA-55-7726-01A-11R-2170-07	0	7.8527	6.5217	0	0	755.191	0	0	43.2121	0	0	0	0	6.2112	0	2.6619	0	0	0.8873	2.6619	TCGA-55-7726	LUAD	72	FEMALE	WHITE	Stage IA	[Not Applicable]	Lung Adenocarcinoma	[Not Available]	2011	[Not Available]	-26451	Alive	TUMOR FREE	652	#N/A	[Not Available]	#N/A	#N/A	#N/A	#N/A	Complete Remission/Response	#N/A	#N/A	0	652	0	652
TCGA-73-4666	TCGA-73-4666-01A-01R-1206-07	0	0.9055	2.3367	0	0.3899	795.553	0	0	35.1204	0	0	0	0	0.503	0	0.503	0.2515	0	1.7607	896.686	TCGA-73-4666	LUAD	52	FEMALE	WHITE	Stage IV	[Not Applicable]	Lung Adenocarcinoma	[Not Available]	2009	[Not Available]	-19074	Alive	TUMOR FREE	800	#N/A	[Not Available]	#N/A	#N/A	#N/A	#N/A	Complete Remission/Response	#N/A	#N/A	0	800	0	800
TCGA-91-6849	TCGA-91-6849-01A-11R-1949-07	0	5.1613	0	0	0	546.096	0	0	32.7364	0	0	0	1.3348	7.7864	1.1123	1.1123	0	0	2.2247	6.6741	TCGA-91-6849	LUAD	75	FEMALE	BLACK OR AFRICAN AMERICAN	Stage IIIA	[Not Applicable]	Lung Adenocarcinoma	[Not Available]	2009	[Not Available]	-27676	Alive	#N/A	35	#N/A	[Not Available]	#N/A	#N/A	#N/A	#N/A	[Unknown]	#N/A	#N/A	0	35	0	35
TCGA-78-8648	TCGA-78-8648-01A-11R-2403-07	0	17.4943	0	0	0	410.359	0	0	26.6921	0	0	0	0	0.7639	0	12.2231	9.9312	0	0	133.69	TCGA-78-8648	LUAD	58	FEMALE	[Not Evaluated]	Stage IIB	[Not Applicable]	Lung Adenocarcinoma	[Not Available]	2002	[Not Available]	-21443	Dead	#N/A	#N/A	1209	[Not Available]	Locoregional Recurrence	#N/A	#N/A	720	[Unknown]	#N/A	#N/A	1	1209	#N/A	1209
TCGA-97-8179	TCGA-97-8179-01A-11R-2287-07	0	3.279	0	4.0473	0	1301.88	0	0	25.6771	0	0	0.388	0.388	3.1044	0	4.6566	1.5522	0	0	4.6566	TCGA-97-8179	LUAD	72	MALE	WHITE	Stage IA	[Not Applicable]	Lung Adenocarcinoma	[Not Available]	2012	[Not Available]	-26305	Alive	TUMOR FREE	435	#N/A	[Not Available]	#N/A	#N/A	#N/A	#N/A	Complete Remission/Response	#N/A	#N/A	0	435	0	435
TCGA-67-3774	TCGA-67-3774-01A-01R-0946-07	0	1.7116	0	0	1.0985	346.869	0	0	18.1958	0	0	0	0	7.0254	0	5.1094	3.832	1.916	0	37.043	TCGA-67-3774	LUAD	73	FEMALE	WHITE	Stage IB	[Not Applicable]	Lung Adenocarcinoma	[Not Available]	2009	[Not Available]	-26704	Alive	TUMOR FREE	385	#N/A	[Not Available]	#N/A	#N/A	#N/A	#N/A	[Not Available]	#N/A	#N/A	0	385	0	385
TCGA-50-5055	TCGA-50-5055-01A-01R-1628-07	0	3.9286	0	0	0	193.231	0	2.3671	18.0814	0	0	0	0	8.3056	0	8.3056	3.3223	0	3.3223	74.7508	TCGA-50-5055	LUAD	79	FEMALE	WHITE	Stage IIA	[Not Applicable]	Lung Adenocarcinoma	[Not Available]	2008	[Not Available]	-28988	Dead	WITH TUMOR	#N/A	1830	[Not Available]	Locoregional Recurrence|Distant Metastasis	#N/A	#N/A	771	Stable Disease	#N/A	#N/A	1	1830	1	1830
TCGA-50-6590	TCGA-50-6590-01A-12R-1858-07	0	0	0	0	0.9402	333.391	2.837	0	16.6359	0	0	0	0	0	0	0	0	0.5435	0	88.0435	TCGA-50-6590	LUAD	72	FEMALE	WHITE	Stage IB	[Not Applicable]	Lung Adenocarcinoma	[Not Available]	2005	[Not Available]	-26444	Dead	TUMOR FREE	#N/A	1288	[Not Available]	#N/A	#N/A	#N/A	#N/A	Complete Remission/Response	#N/A	#N/A	1	1288	0	1288
TCGA-55-8620	TCGA-55-8620-01A-11R-2403-07	0	2.8516	1.8574	0	0	74.4813	0	0.8989	10.9897	0	0	0	0	1.1907	0	1.1907	0	0	0.5953	659.622	TCGA-55-8620	LUAD	60	MALE	WHITE	Stage IV	[Not Applicable]	Lung Adenocarcinoma	[Not Available]	2012	[Not Available]	-22091	Dead	WITH TUMOR	#N/A	375	[Not Available]	#N/A	#N/A	#N/A	#N/A	Progressive Disease	#N/A	#N/A	1	375	1	375
TCGA-62-8395	TCGA-62-8395-01A-11R-2326-07	0	13.9831	5.1888	2.522	0	72.433	0	0	7.1933	0	0	0	0	10.0882	0	8.7723	0	0	1.7545	15.3516	TCGA-62-8395	LUAD	80	FEMALE	WHITE	Stage IIB	[Not Applicable]	Lung Adenocarcinoma	[Not Available]	2009	[Not Available]	-29311	Alive	WITH TUMOR	1216	#N/A	[Not Available]	Locoregional Recurrence	#N/A	#N/A	395	Complete Remission/Response	#N/A	#N/A	0	1216	0	1216
TCGA-L9-A743	TCGA-L9-A743-01A-43R-A39D-07	0	0	0	0	0	43.5222	0	0	6.9972	0	0	0	0	3.305	0	1.4164	1.4164	0	0.4721	323.89	TCGA-L9-A743	LUAD	56	MALE	BLACK OR AFRICAN AMERICAN	Stage IIA	[Not Applicable]	Lung Adenocarcinoma	[Not Available]	2013	[Not Available]	-20780	Alive	TUMOR FREE	664	#N/A	[Not Available]	#N/A	#N/A	#N/A	#N/A	Complete Remission/Response	#N/A	#N/A	0	664	0	664
TCGA-91-6847	TCGA-91-6847-01A-11R-1949-07	0	0	0	0	0	24.0233	0	0	5.4489	0	0	0	1.1172	0.6854	0.3427	0	2.0562	0	16.4496	390.678	TCGA-91-6847	LUAD	62	FEMALE	WHITE	Stage IB	[Not Applicable]	Lung Adenocarcinoma	[Not Available]	2002	[Not Available]	-22862	Alive	WITH TUMOR	842	#N/A	[Not Available]	Distant Metastasis	#N/A	#N/A	772	Progressive Disease	#N/A	#N/A	0	842	0	842
TCGA-50-5044	TCGA-50-5044-01A-21R-1858-07	0	0	0	0	0	11.955	0	0	5.4452	0	0	0	0	0	0	0	19.4473	0	0	122.825	TCGA-50-5044	LUAD	72	FEMALE	WHITE	Stage IIIB	[Not Applicable]	Lung Adenocarcinoma	[Not Available]	2002	[Not Available]	-26567	Dead	WITH TUMOR	#N/A	624	[Not Available]	Distant Metastasis	#N/A	#N/A	483	Progressive Disease	#N/A	#N/A	1	624	1	624
TCGA-91-6829	TCGA-91-6829-01A-21R-1858-07	0	0	0	0	0	20.2272	0	0	5.0697	0	0.5163	0	0	6.7114	0	0	2.5813	0	1.0325	555.498	TCGA-91-6829	LUAD	78	MALE	WHITE	Stage IB	[Not Applicable]	Lung Adenocarcinoma	[Not Available]	2001	[Not Available]	-28841	Dead	TUMOR FREE	#N/A	1258	[Not Available]	#N/A	#N/A	#N/A	#N/A	Progressive Disease	#N/A	#N/A	1	1258	0	1258
TCGA-86-A4P8	TCGA-86-A4P8-01A-11R-A24X-07	0	3.7648	0	0	0	1.3263	0	0	4.9362	0	0	0	0	0	0	29.1705	4.5579	0.4558	1.8232	36.9189	TCGA-86-A4P8	LUAD	59	FEMALE	WHITE	Stage IIIA	[Not Applicable]	Lung Adenocarcinoma	[Not Available]	2012	[Not Available]	-21738	Alive	TUMOR FREE	805	#N/A	[Not Available]	#N/A	#N/A	#N/A	#N/A	Complete Remission/Response	#N/A	#N/A	0	805	0	805
TCGA-55-8508	TCGA-55-8508-01A-11R-2403-07	0	0	0	0	0	11.5915	0	0	4.3236	0	0	0	4.4209	5.305	1.7683	155.614	0	0.8842	49.5137	128.205	TCGA-55-8508	LUAD	60	FEMALE	BLACK OR AFRICAN AMERICAN	Stage IIA	[Not Applicable]	Lung Adenocarcinoma	[Not Available]	2012	[Not Available]	-22159	Alive	TUMOR FREE	617	#N/A	[Not Available]	#N/A	#N/A	#N/A	#N/A	Complete Remission/Response	#N/A	#N/A	0	617	0	617
TCGA-97-8175	TCGA-97-8175-01A-11R-2287-07	0	0	0	0	0	20.5078	0	0	4.1878	0	1.7391	5.5652	7.2348	57.0435	3.8261	4.8696	73.3913	0	0.3478	609.043	TCGA-97-8175	LUAD	55	FEMALE	WHITE	Stage IB	[Not Applicable]	Lung Adenocarcinoma	[Not Available]	2011	[Not Available]	-20206	Alive	TUMOR FREE	551	#N/A	[Not Available]	Locoregional Recurrence	#N/A	#N/A	294	Complete Remission/Response	#N/A	#N/A	0	551	0	551
TCGA-MP-A4T7	TCGA-MP-A4T7-01A-11R-A24X-07	0	3.9612	0	0	0	3.6127	0	2.5629	3.9788	0	0	0	0.4411	0.4411	0	3.0878	3.0878	0	2.6467	13.2334	TCGA-MP-A4T7	LUAD	75	FEMALE	[Unknown]	Stage IV	[Not Applicable]	Lung Adenocarcinoma	[Not Available]	2005	[Not Available]	-27603	Dead	#N/A	#N/A	167	[Not Available]	#N/A	#N/A	#N/A	#N/A	[Unknown]	#N/A	#N/A	1	167	#N/A	167
TCGA-50-5936	TCGA-50-5936-01A-11R-1628-07	0	6.2939	4.2398	0	0	22.2149	0	0	3.8012	0	0	0	0	0.731	0	0.731	13.8889	0	0	10.9649	TCGA-50-5936	LUAD	58	MALE	WHITE	Stage IIIA	[Not Applicable]	Lung Adenocarcinoma	[Not Available]	2007	[Not Available]	-21238	Dead	WITH TUMOR	#N/A	257	[Not Available]	#N/A	#N/A	#N/A	150	Progressive Disease	#N/A	#N/A	1	257	1	257
TCGA-NJ-A4YI	TCGA-NJ-A4YI-01A-11R-A262-07	0	13.6153	20.282	0	2.2558	38.5297	0	0	3.1957	0	0	59.7516	0	48.3384	0.6714	10.7419	2.0141	8.7278	0.6714	257.133	TCGA-NJ-A4YI	LUAD	87	FEMALE	WHITE	Stage IIIA	[Not Applicable]	Lung Adenocarcinoma	[Not Available]	2009	[Not Available]	-31867	Dead	#N/A	#N/A	4	[Not Available]	#N/A	#N/A	#N/A	#N/A	[Unknown]	#N/A	#N/A	1	4	#N/A	4
TCGA-44-6775	TCGA-44-6775-01A-11R-1858-07	0	0	0	0	0	13.1701	0	0	2.9833	0	0	0	0.5048	0.5048	0	5.048	8.0767	0	7.5719	155.477	TCGA-44-6775	LUAD	72	FEMALE	WHITE	Stage IB	[Not Applicable]	Lung Adenocarcinoma	[Not Available]	2011	[Not Available]	-26415	Alive	WITH TUMOR	705	#N/A	[Not Available]	Locoregional Recurrence	#N/A	#N/A	684	Complete Remission/Response	#N/A	#N/A	0	705	0	705
TCGA-73-4658	TCGA-73-4658-01A-01R-1755-07	0	0	0	0	0	10.8516	0	0	2.9574	0	0	0.5754	0	1.1507	0.5754	2.3015	5.1784	0	1.1507	5.1784	TCGA-73-4658	LUAD	80	FEMALE	WHITE	Stage IB	[Not Applicable]	Lung Adenocarcinoma	[Not Available]	2004	[Not Available]	-29508	Dead	TUMOR FREE	1600	1600	[Not Available]	#N/A	#N/A	#N/A	#N/A	Complete Remission/Response	#N/A	#N/A	1	1600	0	1600
TCGA-91-6848	TCGA-91-6848-01A-11R-1949-07	0	2.5627	0	0	0	5.8204	0	0	2.504	0	0	0	0	0.8375	0	1.6749	4.1874	1.6749	26.7992	871.81	TCGA-91-6848	LUAD	59	MALE	WHITE	Stage IIIA	[Not Applicable]	Lung Adenocarcinoma	[Not Available]	2009	[Not Available]	-21829	Alive	TUMOR FREE	224	#N/A	[Not Available]	#N/A	#N/A	#N/A	#N/A	Complete Remission/Response	#N/A	#N/A	0	224	0	224
TCGA-38-4626	TCGA-38-4626-01A-01R-1206-07	0	0	0	0	0	12.2912	0	0	2.1877	0	0.2262	0	0.6787	0.4525	0	11.764	8.3706	0	0.6787	119.677	TCGA-38-4626	LUAD	57	FEMALE	WHITE	[Discrepancy]	[Not Applicable]	Lung Adenocarcinoma	[Not Available]	2003	[Not Available]	-20903	Alive	TUMOR FREE	3674	#N/A	[Not Available]	New Primary Tumor	#N/A	#N/A	2518	Complete Remission/Response	#N/A	#N/A	0	3674	0	3674
TCGA-64-1676	TCGA-64-1676-01A-01R-0946-07	0	0	0	0	0	0.7067	0	0	2.0647	0	0	0	0	0.6929	0	3.4643	1.3857	1.3857	4.85	54.0434	TCGA-64-1676	LUAD	58	MALE	WHITE	Stage IA	[Not Applicable]	Lung Adenocarcinoma	[Not Available]	2005	[Not Available]	-21428	Alive	TUMOR FREE	1728	#N/A	[Not Available]	#N/A	#N/A	#N/A	#N/A	Complete Remission/Response	#N/A	#N/A	0	1728	0	1728
TCGA-05-4384	TCGA-05-4384-01A-01R-1755-07	0	4.4716	1.2645	0	0	0.7941	0	0	2.022	0	0	0	0	3.0544	0	3.0544	0.6109	0	0.6109	40.3177	TCGA-05-4384	LUAD	66	MALE	[Not Available]	Stage IIIA	[Not Applicable]	Lung Adenocarcinoma	[Not Available]	2009	[Not Available]	-24411	Alive	WITH TUMOR	426	#N/A	[Not Available]	Distant Metastasis	#N/A	#N/A	183	Progressive Disease	#N/A	#N/A	0	426	0	426
TCGA-95-8039	TCGA-95-8039-01A-11R-2241-07	0	1.1021	0	0	0	28.6628	0	0	1.8343	0	0.3854	0	0	5.7803	0	6.1657	1.1561	0	1.9268	159.538	TCGA-95-8039	LUAD	72	MALE	WHITE	Stage IA	[Not Applicable]	Lung Adenocarcinoma	[Not Available]	2012	[Not Available]	-26317	Alive	TUMOR FREE	830	#N/A	[Not Available]	Locoregional Recurrence	#N/A	#N/A	228	Complete Remission/Response	#N/A	#N/A	0	830	0	830
TCGA-78-7166	TCGA-78-7166-01A-12R-2066-07	0	0	0.691	0	0	72.8578	0	0	1.7967	0	0	0	0.5573	0.4458	0	83.3705	19.1708	4.9041	0.4458	2.675	TCGA-78-7166	LUAD	84	MALE	WHITE	Stage IIB	[Not Applicable]	Lung Adenocarcinoma	[Not Available]	2002	[Not Available]	-30869	Dead	#N/A	#N/A	258	[Not Available]	#N/A	#N/A	#N/A	#N/A	[Not Available]	#N/A	#N/A	1	258	#N/A	258
TCGA-86-A4P7	TCGA-86-A4P7-01A-11R-A24X-07	0	0	0	0	0	3.7287	0	0	1.4896	0	0	0	0	6.6414	0	11.8596	3.7951	0	0	14.2315	TCGA-86-A4P7	LUAD	63	FEMALE	WHITE	Stage IB	[Not Applicable]	Lung Adenocarcinoma	[Not Available]	2012	[Not Available]	-23330	Alive	TUMOR FREE	415	#N/A	[Not Available]	#N/A	#N/A	#N/A	#N/A	Complete Remission/Response	#N/A	#N/A	0	415	0	415
TCGA-73-4676	TCGA-73-4676-01A-01R-1755-07	0	0	0	0	0	38.7124	0	0	1.3931	0	0	0	0	7.9156	0	1.0554	1.5831	0	0	475.989	TCGA-73-4676	LUAD	45	MALE	WHITE	Stage IIA	[Not Applicable]	Lung Adenocarcinoma	[Not Available]	2010	[Not Available]	-16746	Dead	WITH TUMOR	#N/A	281	[Not Available]	#N/A	#N/A	#N/A	#N/A	[Unknown]	#N/A	#N/A	1	281	1	281
TCGA-44-7669	TCGA-44-7669-01A-21R-2066-07	0	1.1838	0.7698	0	0	70.283	0	0	1.3709	0	0.3067	0	0	2.4535	0	8.5872	1.5334	469.228	52.7498	1073.4	TCGA-44-7669	LUAD	59	MALE	BLACK OR AFRICAN AMERICAN	Stage IIA	[Not Applicable]	Lung Adenocarcinoma	[Not Available]	2010	[Not Available]	-21893	Dead	WITH TUMOR	#N/A	574	[Not Available]	#N/A	#N/A	#N/A	390	Complete Remission/Response	#N/A	#N/A	1	574	1	574
TCGA-MP-A4T6	TCGA-MP-A4T6-01A-32R-A262-07	0	0	0	0	0	1.1089	0	1.1894	1.3614	0	0.366	0	0	411.345	1.0979	2.1958	0	0	2.1958	5.1235	TCGA-MP-A4T6	LUAD	76	FEMALE	WHITE	Stage IIIA	[Not Applicable]	Lung Adenocarcinoma	[Not Available]	2005	[Not Available]	-27993	Dead	TUMOR FREE	#N/A	1790	[Not Available]	#N/A	#N/A	#N/A	#N/A	Complete Remission/Response	#N/A	#N/A	1	1790	0	1790
TCGA-44-2668	TCGA-44-2668-01A-01R-0946-07	0	0	0	0	0	2.4647	0	0	1.3565	0	0.2729	0	0	0.5459	0	0.8188	0	0	2.7294	70.4197	TCGA-44-2668	LUAD	51	MALE	WHITE	Stage IB	[Not Applicable]	Lung Adenocarcinoma	[Not Available]	2009	[Not Available]	-18856	Dead	WITH TUMOR	#N/A	761	[Not Available]	#N/A	#N/A	#N/A	433	Complete Remission/Response	#N/A	#N/A	1	761	1	761
TCGA-50-5935	TCGA-50-5935-01A-11R-1755-07	0	0	0	0	0	0	0	0	1.2733	0	0	1.9099	133.497	12.7328	6.3664	9.5496	1.2733	2.5466	0	310.68	TCGA-50-5935	LUAD	86	FEMALE	WHITE	Stage IA	[Not Applicable]	Lung Adenocarcinoma	[Not Available]	2006	[Not Available]	-31610	Dead	TUMOR FREE	653	653	[Not Available]	#N/A	#N/A	#N/A	#N/A	Complete Remission/Response	#N/A	#N/A	1	653	0	653
TCGA-05-4425	TCGA-05-4425-01A-01R-1755-07	0	0	0	0	0	0	0	0	1.1192	0	0.5596	0	0	3.9172	0	2.2384	0.5596	0	9.5132	551.763	TCGA-05-4425	LUAD	70	FEMALE	[Not Available]	Stage IV	[Not Applicable]	Lung Adenocarcinoma	[Not Available]	2008	[Not Available]	-25902	Alive	#N/A	669	#N/A	[Not Available]	#N/A	#N/A	#N/A	#N/A	[Not Available]	#N/A	#N/A	0	669	0	669
TCGA-55-7911	TCGA-55-7911-01A-11R-2170-07	0	0	0	0	0	0	0	0	1.0572	0	0	0	0	1.5858	0	0.5286	2.6431	0	1.5858	390.115	TCGA-55-7911	LUAD	70	FEMALE	WHITE	Stage IA	[Not Applicable]	Lung Adenocarcinoma	[Not Available]	2011	[Not Available]	-25746	Alive	TUMOR FREE	537	#N/A	[Not Available]	New Primary Tumor	#N/A	#N/A	515	Complete Remission/Response	#N/A	#N/A	0	537	0	537
TCGA-35-3615	TCGA-35-3615-01A-01R-0946-07	0	1.1436	0.5068	0	0	22.1183	0	0	0.9227	0	0	0	0.3249	6.8226	0	2.5991	1.6244	0.3249	0	6.4977	TCGA-35-3615	LUAD	57	MALE	WHITE	Stage IB	[Not Applicable]	Lung Adenocarcinoma	[Not Available]	2007	[Not Available]	-21076	Alive	TUMOR FREE	14	#N/A	[Not Available]	#N/A	#N/A	#N/A	#N/A	[Not Available]	#N/A	#N/A	0	14	0	14
TCGA-93-A4JO	TCGA-93-A4JO-01A-21R-A24X-07	0	0	0	0	0	91.6579	0	0	0.9153	0	0	0	0	1.046	0	3.6611	0	0	3.6611	33.9958	TCGA-93-A4JO	LUAD	70	MALE	WHITE	Stage IA	[Not Applicable]	Lung Adenocarcinoma	[Not Available]	2012	[Not Available]	-25898	Dead	TUMOR FREE	#N/A	33	[Not Available]	#N/A	#N/A	#N/A	#N/A	[Not Applicable]	#N/A	#N/A	1	33	0	33
TCGA-44-7661	TCGA-44-7661-01A-11R-2066-07	0	0	0.3623	0	0	1.5646	0	0	0.8838	0	0	0	0	0.3123	0	1.5615	5.6215	0	0.3123	533.729	TCGA-44-7661	LUAD	69	FEMALE	WHITE	Stage IB	[Not Applicable]	Lung Adenocarcinoma	[Not Available]	2011	[Not Available]	-25483	Dead	WITH TUMOR	#N/A	557	[Not Available]	Locoregional Recurrence	#N/A	#N/A	335	Complete Remission/Response	#N/A	#N/A	1	557	1	557
TCGA-55-8206	TCGA-55-8206-01A-11R-2241-07	0	0	0	0	0	2.7023	0	0	0.8417	0	0	0.5907	0.2953	107.501	0	5.6113	0.5907	0.5907	0.5907	13.29	TCGA-55-8206	LUAD	56	MALE	WHITE	Stage IA	[Not Applicable]	Lung Adenocarcinoma	[Not Available]	2012	[Not Available]	-20690	Alive	TUMOR FREE	888	#N/A	[Not Available]	#N/A	#N/A	#N/A	#N/A	Complete Remission/Response	#N/A	#N/A	0	888	0	888
TCGA-55-7576	TCGA-55-7576-01A-11R-2066-07	0	1.8818	0	0	0	7.2852	0	2.0968	0.7112	0	0	0.2444	0.7332	0.9775	0.2444	1.4663	0.9775	0	0.7332	189.4	TCGA-55-7576	LUAD	54	MALE	BLACK OR AFRICAN AMERICAN	Stage IB	[Not Applicable]	Lung Adenocarcinoma	[Not Available]	2011	[Not Available]	-19917	Alive	TUMOR FREE	670	#N/A	[Not Available]	#N/A	#N/A	#N/A	#N/A	Complete Remission/Response	#N/A	#N/A	0	670	0	670
TCGA-99-AA5R	TCGA-99-AA5R-01A-11R-A39D-07	0	0.6243	0	0	0	0	0	0.8469	0.7058	0	0	0	0	0	0	18.4582	0	0	0	34.7448	TCGA-99-AA5R	LUAD	70	FEMALE	BLACK OR AFRICAN AMERICAN	Stage IA	[Not Applicable]	Lung Adenocarcinoma	[Not Available]	2013	[Not Available]	-25778	Alive	TUMOR FREE	658	#N/A	[Not Available]	#N/A	#N/A	#N/A	#N/A	Complete Remission/Response	#N/A	#N/A	0	658	0	658
TCGA-86-7714	TCGA-86-7714-01A-12R-2170-07	0	2.4906	0	0	0	4.9906	0	16.9549	0	0	0	0.9398	0	6.5789	0	9.3985	2.8195	0	0	421.053	TCGA-86-7714	LUAD	61	FEMALE	BLACK OR AFRICAN AMERICAN	Stage IIIA	[Not Applicable]	Lung Adenocarcinoma	[Not Available]	2011	[Not Available]	-22619	Dead	WITH TUMOR	#N/A	625	[Not Available]	#N/A	#N/A	#N/A	#N/A	Stable Disease	#N/A	#N/A	1	625	1	625
TCGA-55-6981	TCGA-55-6981-01A-11R-1949-07	0	0	0	0	0	1.6754	0	2.7105	0	0	0	0	0.8772	12.2807	2.6316	2.6316	11.4035	0	0	414.912	TCGA-55-6981	LUAD	53	FEMALE	WHITE	Stage IIIA	[Not Applicable]	Lung Adenocarcinoma	[Not Available]	2005	[Not Available]	-19497	Dead	TUMOR FREE	#N/A	1379	[Not Available]	#N/A	#N/A	#N/A	#N/A	Complete Remission/Response	#N/A	#N/A	1	1379	0	1379
TCGA-86-A456	TCGA-86-A456-01A-11R-A24H-07	0	0	0	0	0	8.6885	0	1.9577	0	0	0.5915	0.5915	0	1.7744	0	3.5487	1.7744	0	1.1829	7.0974	TCGA-86-A456	LUAD	78	FEMALE	ASIAN	Stage IA	[Not Applicable]	Lung Adenocarcinoma	[Not Available]	2012	[Not Available]	-28533	Alive	TUMOR FREE	896	#N/A	[Not Available]	#N/A	#N/A	#N/A	#N/A	Complete Remission/Response	#N/A	#N/A	0	896	0	896
TCGA-75-6206	TCGA-75-6206-01A-11R-1755-07	0	0	0	0	0	2.4795	0	1.2964	0	0	0	0	0	4.4053	0.6293	3.1466	0	0	1.2587	3.1466	TCGA-75-6206	LUAD	#N/A	MALE	[Not Available]	Stage IB	[Not Applicable]	Lung Adenocarcinoma	[Not Available]	#N/A	[Not Available]	#N/A	Alive	TUMOR FREE	2590	#N/A	[Not Available]	#N/A	#N/A	#N/A	#N/A	Complete Remission/Response	#N/A	#N/A	0	2590	0	2590
TCGA-86-8672	TCGA-86-8672-01A-21R-2403-07	0	0	0	0	0	1.4692	1.9958	0	0	0	0	0	0	0.693	0	10.395	0.693	0	0.693	363.132	TCGA-86-8672	LUAD	59	MALE	WHITE	Stage IIB	[Not Applicable]	Lung Adenocarcinoma	[Not Available]	2012	[Not Available]	-21682	Dead	TUMOR FREE	#N/A	19	[Not Available]	#N/A	#N/A	#N/A	#N/A	Complete Remission/Response	#N/A	#N/A	1	19	0	19
TCGA-49-AAR9	TCGA-49-AAR9-01A-21R-A41B-07	0	0	0	0	0	9.1051	1.4502	0	0	0	0.4589	0	0	9.1785	0	1.3768	9.1785	0	2.2946	5.5071	TCGA-49-AAR9	LUAD	61	MALE	BLACK OR AFRICAN AMERICAN	Stage IIB	[Not Applicable]	Lung Adenocarcinoma	[Not Available]	1999	[Not Available]	-22510	Dead	WITH TUMOR	#N/A	260	[Not Available]	#N/A	#N/A	#N/A	#N/A	Progressive Disease	#N/A	#N/A	1	260	1	260
TCGA-53-7813	TCGA-53-7813-01A-11R-2170-07	0	0	0	0	0	0	1.0277	0	0	0	0	0	0	0	0	31.8602	0	3.0832	9.2497	160.329	TCGA-53-7813	LUAD	51	FEMALE	WHITE	Stage IIIB	[Not Applicable]	Lung Adenocarcinoma	[Not Available]	2008	[Not Available]	-18875	Alive	TUMOR FREE	424	#N/A	[Not Available]	#N/A	#N/A	#N/A	#N/A	Progressive Disease	#N/A	#N/A	0	424	0	424
TCGA-64-5775	TCGA-64-5775-01A-01R-1628-07	0	0	0	0	0	1.8611	0.9236	0	0	0	0	0	0	0.4641	0	0	0	0	0.9282	252.011	TCGA-64-5775	LUAD	71	MALE	WHITE	Stage IIIA	[Not Applicable]	Lung Adenocarcinoma	[Not Available]	2005	[Not Available]	-26058	Dead	WITH TUMOR	#N/A	62	[Not Available]	#N/A	#N/A	#N/A	#N/A	Progressive Disease	#N/A	#N/A	1	62	1	62
TCGA-97-7547	TCGA-97-7547-01A-11R-2039-07	0	0	0	0	0	0	0.4377	0	0	0	0	0	0	0.4377	0	1.7507	0	0	1.7507	263.486	TCGA-97-7547	LUAD	67	FEMALE	WHITE	Stage IB	[Not Applicable]	Lung Adenocarcinoma	[Not Available]	2007	[Not Available]	-24737	Alive	WITH TUMOR	1965	#N/A	[Not Available]	#N/A	#N/A	#N/A	775	Progressive Disease	#N/A	#N/A	0	1965	0	1965
TCGA-62-8397	TCGA-62-8397-01A-11R-2326-07	0	4.3066	0	0	0	312.482	0	0	0	0	0	4.3796	0	1.4599	1.4599	0	259.854	1.4599	0	268.613	TCGA-62-8397	LUAD	70	FEMALE	WHITE	Stage IIB	[Not Applicable]	Lung Adenocarcinoma	[Not Available]	2008	[Not Available]	-25728	Alive	TUMOR FREE	1289	#N/A	[Not Available]	#N/A	#N/A	#N/A	#N/A	Complete Remission/Response	#N/A	#N/A	0	1289	0	1289
TCGA-38-6178	TCGA-38-6178-01A-11R-1755-07	0	0	0	0	0	302.652	0	0	0	0	0	0	0.78	14.8206	0	3.1201	0.78	0	0.78	46.8019	TCGA-38-6178	LUAD	70	FEMALE	WHITE	Stage IIIA	[Not Applicable]	Lung Adenocarcinoma	[Not Available]	2010	[Not Available]	-25593	Alive	WITH TUMOR	448	#N/A	[Not Available]	#N/A	#N/A	#N/A	#N/A	Stable Disease	#N/A	#N/A	0	448	0	448
TCGA-05-4396	TCGA-05-4396-01A-21R-1858-07	0	16.232	8.1501	0	0	190.933	0	0	0	0	2.2745	5.3071	173.942	3207.73	32.6005	597.422	18.1956	0	0	470.053	TCGA-05-4396	LUAD	76	MALE	[Not Available]	Stage IIIB	[Not Applicable]	Lung Adenocarcinoma	[Not Available]	2006	[Not Available]	-28094	Dead	#N/A	#N/A	303	[Not Available]	#N/A	#N/A	#N/A	#N/A	[Not Available]	#N/A	#N/A	1	303	#N/A	303
TCGA-NJ-A4YG	TCGA-NJ-A4YG-01A-22R-A262-07	0	14.5266	0	0	0	124.042	0	0	0	0	0	3.4642	0	10.97	0	20.2079	2.8868	0	0.5774	22.5173	TCGA-NJ-A4YG	LUAD	65	MALE	WHITE	Stage IB	[Not Applicable]	Lung Adenocarcinoma	[Not Available]	2008	[Not Available]	-23812	Alive	TUMOR FREE	2261	#N/A	[Not Available]	#N/A	#N/A	#N/A	#N/A	Stable Disease	#N/A	#N/A	0	2261	0	2261
TCGA-49-6744	TCGA-49-6744-01A-11R-1858-07	0	0	1.5631	0	0	64.6283	0	0	0	0	0	0	0	2.0367	0	3.5642	4.5825	0.5092	1.5275	79.9389	TCGA-49-6744	LUAD	64	FEMALE	WHITE	Stage IIA	[Not Applicable]	Lung Adenocarcinoma	[Not Available]	2010	[Not Available]	-23484	Alive	TUMOR FREE	1683	#N/A	[Not Available]	#N/A	#N/A	#N/A	#N/A	Complete Remission/Response	#N/A	#N/A	0	1683	0	1683
TCGA-50-6595	TCGA-50-6595-01A-12R-1858-07	0	1.6399	0	0	0	51.0932	0	0	0	0	0.6431	0	0	0	0	0	0.6431	0	3.8585	76.5273	TCGA-50-6595	LUAD	74	FEMALE	WHITE	Stage IIIA	[Not Applicable]	Lung Adenocarcinoma	[Not Available]	2009	[Not Available]	-27197	Dead	WITH TUMOR	#N/A	189	[Not Available]	Distant Metastasis	#N/A	#N/A	182	Progressive Disease	#N/A	#N/A	1	189	1	189
TCGA-93-A4JN	TCGA-93-A4JN-01A-11R-A24X-07	0	0	0	0	0	48.6284	0	0	0	0	0.4156	0	0.4156	7.4813	0	4.5719	3.325	0	2.0781	91.8537	TCGA-93-A4JN	LUAD	71	MALE	WHITE	Stage IV	[Not Applicable]	Lung Adenocarcinoma	[Not Available]	2012	[Not Available]	-26273	Alive	WITH TUMOR	718	#N/A	[Not Available]	#N/A	#N/A	#N/A	#N/A	Stable Disease	#N/A	#N/A	0	718	0	718
TCGA-55-6982	TCGA-55-6982-01A-11R-1949-07	0	5.8723	0	0	0	44.8306	0	0	0	0	0	0	0	3.6875	0	2.7656	4.6094	0	0	259.046	TCGA-55-6982	LUAD	79	FEMALE	WHITE	Stage IIB	[Not Applicable]	Lung Adenocarcinoma	[Not Available]	2004	[Not Available]	#N/A	Dead	WITH TUMOR	#N/A	995	[Not Available]	Distant Metastasis	#N/A	#N/A	183	Progressive Disease	#N/A	#N/A	1	995	1	995
TCGA-97-A4M3	TCGA-97-A4M3-01A-11R-A24X-07	0	0	0	0	0	44.0061	0	0	0	0	0	0	0	2.0233	0	4.0465	0	0	0	4.5524	TCGA-97-A4M3	LUAD	69	FEMALE	WHITE	Stage IA	[Not Applicable]	Lung Adenocarcinoma	[Not Available]	2012	[Not Available]	-25384	Alive	TUMOR FREE	540	#N/A	[Not Available]	New Primary Tumor	#N/A	#N/A	54	Complete Remission/Response	#N/A	#N/A	0	540	0	540
TCGA-55-6978	TCGA-55-6978-01A-11R-1949-07	0	0	0.915	0	0	41.2348	0	0	0	0	0	0	0	0.3603	0	0.3603	2.1615	0	2.5218	251.818	TCGA-55-6978	LUAD	81	MALE	WHITE	Stage IIA	[Not Applicable]	Lung Adenocarcinoma	[Not Available]	2010	[Not Available]	#N/A	Dead	WITH TUMOR	#N/A	176	[Not Available]	#N/A	#N/A	#N/A	42	Progressive Disease	#N/A	#N/A	1	176	1	176
TCGA-71-8520	TCGA-71-8520-01A-11R-2403-07	0	0	0	0	0	39.0594	0	0	0	0	1.24	1.24	4.7925	230.016	0.62	1.86	5.5799	0	4.3399	668.349	TCGA-71-8520	LUAD	60	FEMALE	ASIAN	Stage IB	[Not Applicable]	Lung Adenocarcinoma	[Not Available]	2011	[Not Available]	-21921	Dead	WITH TUMOR	#N/A	210	[Not Available]	Locoregional Recurrence	#N/A	#N/A	179	Complete Remission/Response	#N/A	#N/A	1	210	1	210
TCGA-80-5608	TCGA-80-5608-01A-31R-1949-07	0	0	0	0	0	34.4003	0	0	0	0	0	0	1.7732	0.7093	0	87.9514	5.6743	27.3075	1.4186	255.697	TCGA-80-5608	LUAD	#N/A	FEMALE	[Not Available]	Stage IA	[Not Applicable]	Lung Adenocarcinoma	[Not Available]	#N/A	[Not Available]	#N/A	Alive	TUMOR FREE	2832	#N/A	[Not Available]	#N/A	#N/A	#N/A	#N/A	Complete Remission/Response	#N/A	#N/A	0	2832	0	2832
TCGA-78-8655	TCGA-78-8655-01A-11R-2403-07	0	0	0	0	0	24.0659	0	0	0	0	0.6333	0.6333	3.7999	6.9664	3.7999	0	3.7999	0	0	198.227	TCGA-78-8655	LUAD	77	FEMALE	[Not Evaluated]	Stage IA	[Not Applicable]	Lung Adenocarcinoma	[Not Available]	2003	[Not Available]	-28379	Alive	#N/A	2360	#N/A	[Not Available]	#N/A	#N/A	#N/A	#N/A	Complete Remission/Response	#N/A	#N/A	0	2360	0	2360
TCGA-86-8674	TCGA-86-8674-01A-21R-2403-07	0	0	0	0	0	19.674	0	0	0	0	0	0	0	10.118	0	0.5621	0.5621	0	0.5621	2.8106	TCGA-86-8674	LUAD	50	MALE	WHITE	Stage IIA	[Not Applicable]	Lung Adenocarcinoma	[Not Available]	2012	[Not Available]	-18479	Alive	TUMOR FREE	806	#N/A	[Not Available]	Locoregional Recurrence	#N/A	#N/A	334	Complete Remission/Response	#N/A	#N/A	0	806	0	806
TCGA-86-8669	TCGA-86-8669-01A-11R-2403-07	0	0	1.8336	0	0	18.9603	0	0	0	0	0	0	0	40.9578	0	47.259	0	225.583	0	269.691	TCGA-86-8669	LUAD	64	MALE	WHITE	Stage IA	[Not Applicable]	Lung Adenocarcinoma	[Not Available]	2012	[Not Available]	-23443	Alive	TUMOR FREE	938	#N/A	[Not Available]	Distant Metastasis	#N/A	#N/A	849	Complete Remission/Response	#N/A	#N/A	0	938	0	938
TCGA-95-A4VN	TCGA-95-A4VN-01A-11R-A262-07	0	1.9639	0	0	0	18.8791	0	0	0	0	0	0	0	0	0	1.3895	1.3895	0	0.4632	86.151	TCGA-95-A4VN	LUAD	62	FEMALE	WHITE	Stage IIA	[Not Applicable]	Lung Adenocarcinoma	[Not Available]	2012	[Not Available]	-22927	Alive	TUMOR FREE	553	#N/A	[Not Available]	#N/A	#N/A	#N/A	#N/A	Stable Disease	#N/A	#N/A	0	553	0	553
TCGA-91-6828	TCGA-91-6828-01A-11R-1858-07	0	0	0	0	0	15.9933	0	0	0	0	0	0	22.5758	60.6061	3.367	16.835	1.6835	4.2088	1.6835	142.256	TCGA-91-6828	LUAD	70	MALE	WHITE	Stage IA	[Not Applicable]	Lung Adenocarcinoma	[Not Available]	2011	[Not Available]	-25870	Alive	TUMOR FREE	323	#N/A	[Not Available]	#N/A	#N/A	#N/A	#N/A	Complete Remission/Response	#N/A	#N/A	0	323	0	323
TCGA-64-5815	TCGA-64-5815-01A-01R-1628-07	0	0	0	0	0	15.7109	0	0	0	0	0	0	0.7855	14.9254	0	0	2.3566	0.7855	0.7855	186.96	TCGA-64-5815	LUAD	74	MALE	WHITE	Stage IIB	[Not Applicable]	Lung Adenocarcinoma	[Not Available]	2009	[Not Available]	-27280	Alive	TUMOR FREE	866	#N/A	[Not Available]	#N/A	#N/A	#N/A	#N/A	Complete Remission/Response	#N/A	#N/A	0	866	0	866
TCGA-69-7978	TCGA-69-7978-01A-11R-2187-07	0	0	0	0	0	14.7949	0	0	0	0	0	0	0	5.38	0	0.3362	0.6725	0.6725	3.0262	479.489	TCGA-69-7978	LUAD	59	MALE	WHITE	Stage IIB	[Not Applicable]	Lung Adenocarcinoma	[Not Available]	2011	[Not Available]	-21785	Alive	[Discrepancy]	134	#N/A	[Not Available]	#N/A	#N/A	#N/A	#N/A	[Unknown]	#N/A	#N/A	0	134	0	134
TCGA-69-7765	TCGA-69-7765-01A-11R-2170-07	0	0	1.829	0	0	13.7765	0	0	0	0	0	0	0	1.8727	0.6242	2.4969	2.4969	0	9.3633	18.1024	TCGA-69-7765	LUAD	56	MALE	BLACK OR AFRICAN AMERICAN	[Discrepancy]	[Not Applicable]	Lung Adenocarcinoma	[Not Available]	2011	[Not Available]	-20625	Alive	#N/A	165	#N/A	[Not Available]	#N/A	#N/A	#N/A	#N/A	[Not Available]	#N/A	#N/A	0	165	0	165
TCGA-J2-A4AE	TCGA-J2-A4AE-01A-21R-A24H-07	0	0	0	0	0	13.5934	0	0	0	0	0	0	0	39.0071	0	11.2293	1.182	0	4.1371	124.114	TCGA-J2-A4AE	LUAD	77	FEMALE	WHITE	Stage IA	[Not Applicable]	Lung Adenocarcinoma	[Not Available]	2012	[Not Available]	-28163	Alive	TUMOR FREE	1079	#N/A	[Not Available]	#N/A	#N/A	#N/A	#N/A	Complete Remission/Response	#N/A	#N/A	0	1079	0	1079
TCGA-86-8671	TCGA-86-8671-01A-11R-2403-07	0	0	0	0	0	13.225	0	0	0	0	0	0	0	4.4083	0	2.2042	1.6531	0	11.5718	29.2051	TCGA-86-8671	LUAD	72	FEMALE	WHITE	Stage IIB	[Not Applicable]	Lung Adenocarcinoma	[Not Available]	2012	[Not Available]	-26448	Alive	TUMOR FREE	839	#N/A	[Not Available]	#N/A	#N/A	#N/A	#N/A	Complete Remission/Response	#N/A	#N/A	0	839	0	839
TCGA-05-5423	TCGA-05-5423-01A-01R-1628-07	0	0	0	0	0	12.4542	0	0	0	0	0	2.1978	2.9304	48.3516	0	8.0586	3.663	0	0	34.4322	TCGA-05-5423	LUAD	65	MALE	[Not Available]	Stage IIB	[Not Applicable]	Lung Adenocarcinoma	[Not Available]	2006	[Not Available]	-23863	Alive	TUMOR FREE	151	#N/A	[Not Available]	#N/A	#N/A	#N/A	#N/A	[Not Available]	#N/A	#N/A	0	151	0	151
TCGA-55-8506	TCGA-55-8506-01A-11R-2403-07	0	0	0	0	0	11.8243	0	0	0	0	0.5631	0	0	4.5045	0	0	0.5631	0.5631	1.1261	0	TCGA-55-8506	LUAD	62	FEMALE	WHITE	Stage IIB	[Not Applicable]	Lung Adenocarcinoma	[Not Available]	2012	[Not Available]	-22850	Alive	#N/A	11	#N/A	[Not Available]	#N/A	#N/A	#N/A	#N/A	[Not Applicable]	#N/A	#N/A	0	11	0	11
TCGA-55-7725	TCGA-55-7725-01A-11R-2170-07	0	0	0	0	0	11.5546	0	0	0	0	0	0	0	0	0	0	4.2017	0	0	211.135	TCGA-55-7725	LUAD	68	FEMALE	WHITE	Stage IA	[Not Applicable]	Lung Adenocarcinoma	[Not Available]	2011	[Not Available]	-24848	Alive	TUMOR FREE	442	#N/A	[Not Available]	#N/A	#N/A	#N/A	#N/A	Complete Remission/Response	#N/A	#N/A	0	442	0	442
TCGA-78-7633	TCGA-78-7633-01A-11R-2066-07	0	0	0	0	0	11.5163	0	0	0	0	0	0	0	0	0	2.8791	0.2879	0	0.2879	3.167	TCGA-78-7633	LUAD	67	MALE	WHITE	Stage IB	[Not Applicable]	Lung Adenocarcinoma	[Not Available]	2009	[Not Available]	-24713	Dead	WITH TUMOR	#N/A	1528	[Not Available]	Locoregional Recurrence	#N/A	#N/A	1450	Complete Remission/Response	#N/A	#N/A	1	1528	1	1528
TCGA-50-5930	TCGA-50-5930-01A-11R-1755-07	0	1.421	0	0	0	10.5315	0	0	0	0	0	1.3281	58.3812	9.2964	2.6561	155.382	2.6561	0	2.6561	17.2647	TCGA-50-5930	LUAD	47	MALE	WHITE	Stage IIIA	[Not Applicable]	Lung Adenocarcinoma	[Not Available]	2001	[Not Available]	-17238	Dead	WITH TUMOR	#N/A	282	[Not Available]	Distant Metastasis	#N/A	#N/A	177	Progressive Disease	#N/A	#N/A	1	282	1	282
TCGA-55-6972	TCGA-55-6972-01A-11R-1949-07	0	0	0	0	0	10.274	0	0	0	0	0	0	0	0	0	9.1324	1.1416	0	0	4.5662	TCGA-55-6972	LUAD	72	MALE	WHITE	Stage IB	[Not Applicable]	Lung Adenocarcinoma	[Not Available]	2005	[Not Available]	-26625	Dead	TUMOR FREE	#N/A	1632	[Not Available]	#N/A	#N/A	#N/A	#N/A	Complete Remission/Response	#N/A	#N/A	1	1632	0	1632
TCGA-55-6986	TCGA-55-6986-01A-11R-1949-07	0	0	0	0	0	9.4477	0	0	0	0	0.7267	0	0	7.2674	0	2.1802	4.3605	0	0.7267	250.727	TCGA-55-6986	LUAD	74	FEMALE	WHITE	Stage IB	[Not Applicable]	Lung Adenocarcinoma	[Not Available]	2004	[Not Available]	#N/A	Alive	TUMOR FREE	3261	#N/A	[Not Available]	#N/A	#N/A	#N/A	#N/A	Complete Remission/Response	#N/A	#N/A	0	3261	0	3261
TCGA-97-A4LX	TCGA-97-A4LX-01A-11R-A24X-07	0	0	0	0	0	9.2381	0	0	0	0	0	0	0	3.9592	0	4.3991	0.4399	0.4399	8.3583	14.517	TCGA-97-A4LX	LUAD	81	MALE	WHITE	Stage IB	[Not Applicable]	Lung Adenocarcinoma	[Not Available]	2012	[Not Available]	-29915	Alive	TUMOR FREE	614	#N/A	[Not Available]	#N/A	#N/A	#N/A	#N/A	Complete Remission/Response	#N/A	#N/A	0	614	0	614
TCGA-MN-A4N1	TCGA-MN-A4N1-01A-11R-A24X-07	0	0	0	0	0	8.7255	0	0	0	0	0	1.662	1.2465	8.7255	3.324	4.5705	2.9085	0.831	0	128.389	TCGA-MN-A4N1	LUAD	60	MALE	BLACK OR AFRICAN AMERICAN	Stage IIA	[Not Applicable]	Lung Adenocarcinoma	[Not Available]	2011	[Not Available]	-21939	Alive	TUMOR FREE	827	#N/A	[Not Available]	#N/A	#N/A	#N/A	#N/A	Complete Remission/Response	#N/A	#N/A	0	827	0	827
TCGA-97-7938	TCGA-97-7938-01A-11R-2170-07	0	0	0	0	0	8.4592	0	0	0	0	0	0	1.2085	3.6254	0	5.4381	3.0211	0	3.0211	46.5257	TCGA-97-7938	LUAD	76	FEMALE	WHITE	Stage IA	[Not Applicable]	Lung Adenocarcinoma	[Not Available]	2011	[Not Available]	-27980	Dead	TUMOR FREE	#N/A	18	[Not Available]	#N/A	#N/A	#N/A	#N/A	Complete Remission/Response	#N/A	#N/A	1	18	0	18
TCGA-38-7271	TCGA-38-7271-01A-11R-2039-07	0	0	0	0	0	8.3523	0	0	0	0	0	2.2779	666.15	4.5558	8.3523	57.7069	2.2779	0	3.0372	130.6	TCGA-38-7271	LUAD	72	FEMALE	WHITE	Stage IA	[Not Applicable]	Lung Adenocarcinoma	[Not Available]	2006	[Not Available]	-26440	Dead	WITH TUMOR	#N/A	800	[Not Available]	#N/A	#N/A	#N/A	304	Complete Remission/Response	#N/A	#N/A	1	800	1	800
TCGA-55-7994	TCGA-55-7994-01A-11R-2187-07	0	0	0	0	0	8.2319	0	0	0	0	0	0.6332	0	0.9498	0	0.3166	119.996	0	0	1149.62	TCGA-55-7994	LUAD	81	MALE	WHITE	Stage IIB	[Not Applicable]	Lung Adenocarcinoma	[Not Available]	2011	[Not Available]	-29858	Alive	TUMOR FREE	603	#N/A	[Not Available]	#N/A	#N/A	#N/A	#N/A	Complete Remission/Response	#N/A	#N/A	0	603	0	603
TCGA-MP-A4TI	TCGA-MP-A4TI-01A-21R-A24X-07	0	1.0251	0	0	0	8.2008	0	0	0	0	0	0	0	0.5126	0	0	1.0251	0	6.6632	156.328	TCGA-MP-A4TI	LUAD	72	MALE	WHITE	Stage IIA	[Not Applicable]	Lung Adenocarcinoma	[Not Available]	2010	[Not Available]	-26565	Dead	WITH TUMOR	#N/A	429	[Not Available]	Locoregional Recurrence|Distant Metastasis	#N/A	#N/A	84	[Unknown]	#N/A	#N/A	1	429	1	429
TCGA-62-A46S	TCGA-62-A46S-01A-11R-A24H-07	0	1.5762	0	0	0	7.2539	0	0	0	0	0	0	0	11.0375	0	15.4525	0.883	0	1.3245	139.514	TCGA-62-A46S	LUAD	73	MALE	WHITE	Stage IB	[Not Applicable]	Lung Adenocarcinoma	[Not Available]	2007	[Not Available]	-26825	Dead	WITH TUMOR	#N/A	1653	[Not Available]	Locoregional Recurrence|Distant Metastasis	#N/A	#N/A	527	Complete Remission/Response	#N/A	#N/A	1	1653	1	1653
TCGA-73-4668	TCGA-73-4668-01A-01R-1206-07	0	0	0	0	0	6.6421	0	0	0	0	0	0	0	0	0	0	0	0	0.738	6.1501	TCGA-73-4668	LUAD	66	FEMALE	AMERICAN INDIAN OR ALASKA NATIVE	Stage IIB	[Not Applicable]	Lung Adenocarcinoma	[Not Available]	2009	[Not Available]	-24255	Alive	WITH TUMOR	467	#N/A	[Not Available]	#N/A	#N/A	#N/A	236	Complete Remission/Response	#N/A	#N/A	0	467	0	467
TCGA-78-7153	TCGA-78-7153-01A-11R-2039-07	0	4.5011	7.3626	1.7931	1.8422	6.6073	0	0	0	0	0.6141	0	8.5969	759.597	1.8422	0.6141	8.5969	0	1.2281	320.541	TCGA-78-7153	LUAD	65	FEMALE	WHITE	Stage IB	[Not Applicable]	Lung Adenocarcinoma	[Not Available]	2003	[Not Available]	-23922	Alive	#N/A	3635	#N/A	[Not Available]	#N/A	#N/A	#N/A	#N/A	Complete Remission/Response	#N/A	#N/A	0	3635	0	3635
TCGA-55-7283	TCGA-55-7283-01A-11R-2039-07	0	0	0	0	0	6.5163	0	0	0	0	0	0.5013	0	1.5038	0	1.5038	1.5038	0	1.5038	121.303	TCGA-55-7283	LUAD	76	FEMALE	WHITE	Stage IIIA	[Not Applicable]	Lung Adenocarcinoma	[Not Available]	2011	[Not Available]	-27946	Alive	WITH TUMOR	609	#N/A	[Not Available]	#N/A	#N/A	#N/A	#N/A	Partial Remission/Response	#N/A	#N/A	0	609	0	609
TCGA-78-7152	TCGA-78-7152-01A-11R-2039-07	0	0.9935	0	0	0	6.4345	0	0	0	0	0	0	0	0.9285	0	0.9285	1.857	0	3.714	12.9991	TCGA-78-7152	LUAD	65	MALE	WHITE	Stage IB	[Not Applicable]	Lung Adenocarcinoma	[Not Available]	2003	[Not Available]	-23782	Dead	WITH TUMOR	#N/A	1215	[Not Available]	#N/A	#N/A	#N/A	1202	Complete Remission/Response	#N/A	#N/A	1	1215	1	1215
TCGA-86-A4JF	TCGA-86-A4JF-01A-11R-A24X-07	0	0	0	0	0	6.2011	0	0	0	0	0	0	0	1.7717	0	0	1.3288	0	1.3288	186.919	TCGA-86-A4JF	LUAD	56	MALE	WHITE	Stage IIB	[Not Applicable]	Lung Adenocarcinoma	[Not Available]	2012	[Not Available]	-20491	Dead	WITH TUMOR	#N/A	737	[Not Available]	Distant Metastasis	#N/A	#N/A	436	Complete Remission/Response	#N/A	#N/A	1	737	1	737
TCGA-86-8359	TCGA-86-8359-01A-11R-2326-07	0	0	0	0	0	6.0753	0	0	0	0	0	0	0	1.8226	0	10.9356	1.2151	1.8226	1.2151	219.32	TCGA-86-8359	LUAD	52	MALE	WHITE	Stage IIIA	[Not Applicable]	Lung Adenocarcinoma	[Not Available]	2012	[Not Available]	-19088	Dead	TUMOR FREE	#N/A	444	[Not Available]	#N/A	#N/A	#N/A	#N/A	[Unknown]	#N/A	#N/A	1	444	0	444
TCGA-38-4628	TCGA-38-4628-01A-01R-1206-07	0	0	0	0	0	6.0051	0	0	0	0	0	0.3161	0.3161	1.2642	0	1.5803	0	0	5.689	0	TCGA-38-4628	LUAD	65	FEMALE	WHITE	Stage IIB	[Not Applicable]	Lung Adenocarcinoma	[Not Available]	2002	[Not Available]	-24057	Dead	WITH TUMOR	#N/A	1492	[Not Available]	#N/A	#N/A	#N/A	1083	Complete Remission/Response	#N/A	#N/A	1	1492	1	1492
TCGA-O1-A52J	TCGA-O1-A52J-01A-11R-A262-07	0	0	0	0	0	5.7416	0	0	0	0	0.9569	0.4785	0	1.9139	0	0.4785	61.244	0	2.8708	319.617	TCGA-O1-A52J	LUAD	74	FEMALE	WHITE	Stage IA	[Not Applicable]	Lung Adenocarcinoma	[Not Available]	2007	[Not Available]	-27223	Dead	WITH TUMOR	#N/A	1798	[Not Available]	Locoregional Recurrence	#N/A	#N/A	898	[Unknown]	#N/A	#N/A	1	1798	1	1798
TCGA-86-8668	TCGA-86-8668-01A-11R-2403-07	0	0	0	0	0	5.2083	0	0	0	0	2.2321	0	0	11.9048	0	1.4881	0	0	0.744	84.0774	TCGA-86-8668	LUAD	61	FEMALE	WHITE	Stage IA	[Not Applicable]	Lung Adenocarcinoma	[Not Available]	2012	[Not Available]	-22383	Alive	TUMOR FREE	423	#N/A	[Not Available]	#N/A	#N/A	#N/A	#N/A	Complete Remission/Response	#N/A	#N/A	0	423	0	423
TCGA-67-3773	TCGA-67-3773-01A-01R-0946-07	0	0	0	0	0	5.1387	0	0	0	0	0	0	0	0	0	3.0832	15.4162	0	1.0277	297.019	TCGA-67-3773	LUAD	84	FEMALE	WHITE	Stage IB	[Not Applicable]	Lung Adenocarcinoma	[Not Available]	2009	[Not Available]	-30706	Alive	TUMOR FREE	427	#N/A	[Not Available]	#N/A	#N/A	#N/A	#N/A	[Not Available]	#N/A	#N/A	0	427	0	427
TCGA-05-4426	TCGA-05-4426-01A-01R-1206-07	0	0	0	0	0	4.7425	0	0	0	0	0	0.5928	0	0.2964	0	0.2964	173.398	0	5.3353	165.098	TCGA-05-4426	LUAD	71	MALE	[Not Available]	Stage IB	[Not Applicable]	Lung Adenocarcinoma	[Not Available]	2008	[Not Available]	-26084	Alive	TUMOR FREE	791	#N/A	[Not Available]	#N/A	#N/A	#N/A	457	Complete Remission/Response	#N/A	#N/A	0	791	0	791
TCGA-05-4398	TCGA-05-4398-01A-01R-1206-07	0	0	0	0	0	4.5672	0	0	0	0	0	0	0	1.5224	0	0.2175	0	0	2.6098	48.2819	TCGA-05-4398	LUAD	47	FEMALE	[Not Available]	Stage IIIB	[Not Applicable]	Lung Adenocarcinoma	[Not Available]	2006	[Not Available]	-17471	Alive	TUMOR FREE	1431	#N/A	[Not Available]	#N/A	#N/A	#N/A	#N/A	Complete Remission/Response	#N/A	#N/A	0	1431	0	1431
TCGA-44-6777	TCGA-44-6777-01A-11R-1858-07	0	0	1.3519	0	0	4.4345	0	0	0	0	0	0	49.9737	1.5781	8.9427	1.5781	1.0521	0	4.2083	82.0621	TCGA-44-6777	LUAD	85	FEMALE	WHITE	Stage IB	[Not Applicable]	Lung Adenocarcinoma	[Not Available]	2006	[Not Available]	-31234	Dead	TUMOR FREE	#N/A	987	[Not Available]	#N/A	#N/A	#N/A	#N/A	Complete Remission/Response	#N/A	#N/A	1	987	0	987
TCGA-38-4629	TCGA-38-4629-01A-02R-1206-07	0	0	0	0	0	4.2322	0	0	0	0	0	0.3023	0.3023	4.2322	0	1.5115	4.8368	0	0	146.614	TCGA-38-4629	LUAD	68	MALE	WHITE	Stage IIB	[Not Applicable]	Lung Adenocarcinoma	[Not Available]	2003	[Not Available]	-25104	Dead	WITH TUMOR	#N/A	864	[Not Available]	#N/A	#N/A	#N/A	379	Complete Remission/Response	#N/A	#N/A	1	864	1	864
TCGA-50-5933	TCGA-50-5933-01A-11R-1755-07	0	0.5409	0	0	0	4.0515	0	0	0	0	0.5103	0	1.0205	0	0	2.5513	0	0	0.5103	319.935	TCGA-50-5933	LUAD	72	MALE	WHITE	Stage IIIB	[Not Applicable]	Lung Adenocarcinoma	[Not Available]	2001	[Not Available]	-26377	Dead	TUMOR FREE	2370	2393	[Not Available]	#N/A	#N/A	#N/A	#N/A	Complete Remission/Response	#N/A	#N/A	1	2393	0	2393
TCGA-44-3396	TCGA-44-3396-01A-01R-1206-07	0	0	0	0	0	3.804	0	0	0	0	0	0.6713	0	9.1743	0	2.6852	0.8951	0	3.5802	297.158	TCGA-44-3396	LUAD	74	FEMALE	WHITE	Stage IIIA	[Not Applicable]	Lung Adenocarcinoma	[Not Available]	2009	[Not Available]	-27073	Alive	TUMOR FREE	1130	#N/A	[Not Available]	#N/A	#N/A	#N/A	#N/A	Complete Remission/Response	#N/A	#N/A	0	1130	0	1130
TCGA-62-A46P	TCGA-62-A46P-01A-11R-A24H-07	0	0	0	0	0	3.7594	0	0	0	0	0	0	0	3.7594	0	0.7519	0	0	0.7519	21.8045	TCGA-62-A46P	LUAD	65	MALE	WHITE	Stage IB	[Not Applicable]	Lung Adenocarcinoma	[Not Available]	2006	[Not Available]	-23993	Dead	TUMOR FREE	#N/A	594	[Not Available]	Distant Metastasis	#N/A	#N/A	267	Complete Remission/Response	#N/A	#N/A	1	594	0	594
TCGA-78-7158	TCGA-78-7158-01A-11R-2039-07	0	0	0	0	0	3.7344	0	0	0	0	0	0	0	0.4149	0	0.4149	0	0	0.4149	295.436	TCGA-78-7158	LUAD	59	FEMALE	WHITE	Stage IIIB	[Not Applicable]	Lung Adenocarcinoma	[Not Available]	2007	[Not Available]	-21742	Dead	WITH TUMOR	#N/A	179	[Not Available]	#N/A	#N/A	#N/A	132	Progressive Disease	#N/A	#N/A	1	179	1	179
TCGA-55-A4DG	TCGA-55-A4DG-01A-11R-A24H-07	0	0	0	0	0	3.692	0	0	0	0	0	0	0	1.5823	0	1.0549	0.5274	0	4.7468	13.7131	TCGA-55-A4DG	LUAD	71	MALE	WHITE	Stage IA	[Not Applicable]	Lung Adenocarcinoma	[Not Available]	2012	[Not Available]	-26044	Alive	TUMOR FREE	608	#N/A	[Not Available]	#N/A	#N/A	#N/A	#N/A	Complete Remission/Response	#N/A	#N/A	0	608	0	608
TCGA-86-8075	TCGA-86-8075-01A-11R-2241-07	0	0.917	0	0	0	3.6538	0	0	0	0	0	0.2857	1.1427	14.5693	0	1.4284	9.7129	0	3.1424	83.988	TCGA-86-8075	LUAD	66	FEMALE	WHITE	Stage IB	[Not Applicable]	Lung Adenocarcinoma	[Not Available]	2011	[Not Available]	-24402	Dead	TUMOR FREE	#N/A	694	[Not Available]	Locoregional Recurrence	#N/A	#N/A	199	Complete Remission/Response	#N/A	#N/A	1	694	0	694
TCGA-73-7498	TCGA-73-7498-01A-12R-2187-07	0	0	0	0	0	3.2706	0	0	0	0	0.8177	0.2726	0	4.6334	0	5.1785	0	0.2726	0.2726	6.8138	TCGA-73-7498	LUAD	58	FEMALE	WHITE	Stage IA	[Not Applicable]	Lung Adenocarcinoma	[Not Available]	2010	[Not Available]	-21527	Alive	TUMOR FREE	1189	#N/A	[Not Available]	#N/A	#N/A	#N/A	#N/A	Complete Remission/Response	#N/A	#N/A	0	1189	0	1189
TCGA-MP-A4T8	TCGA-MP-A4T8-01A-11R-A24X-07	0	0	0	0	0	2.9396	0	0	0	0	0.4199	6.7192	1996.17	7.979	83.1496	532.913	5.4593	1.6798	0.8399	46.1942	TCGA-MP-A4T8	LUAD	68	MALE	[Unknown]	Stage IIIA	[Not Applicable]	Lung Adenocarcinoma	[Not Available]	2006	[Not Available]	-25069	Dead	#N/A	#N/A	161	[Not Available]	#N/A	#N/A	#N/A	#N/A	[Unknown]	#N/A	#N/A	1	161	#N/A	161
TCGA-95-7039	TCGA-95-7039-01A-11R-1949-07	0	0.7143	0	0	0	2.8571	0	0	0	0	0	0	0.7143	4.2857	0	5	0.7143	0	0.7143	2.8571	TCGA-95-7039	LUAD	54	FEMALE	WHITE	Stage IIB	[Not Applicable]	Lung Adenocarcinoma	[Not Available]	2011	[Not Available]	-19981	Alive	WITH TUMOR	1272	#N/A	[Not Available]	Locoregional Recurrence	#N/A	#N/A	1258	Complete Remission/Response	#N/A	#N/A	0	1272	0	1272
TCGA-55-7281	TCGA-55-7281-01A-11R-2039-07	0	0	0	0	0	2.849	0	0	0	0	0	0	0.5698	0.5698	0	2.849	0.5698	0	0.5698	22.792	TCGA-55-7281	LUAD	70	FEMALE	WHITE	Stage IA	[Not Applicable]	Lung Adenocarcinoma	[Not Available]	2011	[Not Available]	-25870	Alive	WITH TUMOR	872	#N/A	[Not Available]	Distant Metastasis	#N/A	#N/A	339	Complete Remission/Response	#N/A	#N/A	0	872	0	872
TCGA-99-8032	TCGA-99-8032-01A-11R-2241-07	0	0.8018	5.3584	0	0	2.8356	0	0	0	0	0	1.1734	367.494	0.7822	22.685	375.868	5.4757	4.6935	3.129	81.7444	TCGA-99-8032	LUAD	61	MALE	WHITE	Stage IA	[Not Applicable]	Lung Adenocarcinoma	[Not Available]	2011	[Not Available]	-22635	Alive	TUMOR FREE	44	#N/A	[Not Available]	#N/A	#N/A	#N/A	#N/A	Complete Remission/Response	#N/A	#N/A	0	44	0	44
TCGA-44-4112	TCGA-44-4112-01A-01R-1107-07	0	0	0	0	0	2.8112	0	0	0	0	0	0	56.1365	7.6305	1.6064	3.2129	1.6064	0	4.4177	52.6104	TCGA-44-4112	LUAD	60	FEMALE	WHITE	Stage IB	[Not Applicable]	Lung Adenocarcinoma	[Not Available]	2010	[Not Available]	-22106	Dead	WITH TUMOR	#N/A	808	[Not Available]	#N/A	#N/A	#N/A	619	Complete Remission/Response	#N/A	#N/A	1	808	1	808
TCGA-MP-A4T9	TCGA-MP-A4T9-01A-11R-A24X-07	0	0	0	0	0	2.7877	0	0	0	0	0	0	0.3982	0	0	3.5842	3.9825	0	0	90.4022	TCGA-MP-A4T9	LUAD	54	FEMALE	WHITE	Stage IIIA	[Not Applicable]	Lung Adenocarcinoma	[Not Available]	2006	[Not Available]	-19767	Dead	WITH TUMOR	#N/A	1265	[Not Available]	Locoregional Recurrence|Distant Metastasis	#N/A	#N/A	341	Complete Remission/Response	#N/A	#N/A	1	1265	1	1265
TCGA-44-2666	TCGA-44-2666-01A-01R-0946-07	0	0	1.0885	0	0	2.665	0	0	0	0	0	0	1.2512	0.4171	0	0	2.5023	0	0	533.834	TCGA-44-2666	LUAD	43	MALE	WHITE	Stage IB	[Not Applicable]	Lung Adenocarcinoma	[Not Available]	2009	[Not Available]	-15970	Dead	WITH TUMOR	97	97	[Not Available]	#N/A	#N/A	#N/A	#N/A	[Not Available]	#N/A	#N/A	1	97	1	97
TCGA-78-7539	TCGA-78-7539-01A-11R-2066-07	0	0	0	0	0	2.651	0	0	0	0	0	0	0	1.1782	0	1.1782	0	0	4.7128	12.0766	TCGA-78-7539	LUAD	75	FEMALE	WHITE	Stage IIA	[Not Applicable]	Lung Adenocarcinoma	[Not Available]	2011	[Not Available]	-27445	Alive	#N/A	791	#N/A	[Not Available]	Distant Metastasis	#N/A	#N/A	688	Complete Remission/Response	#N/A	#N/A	0	791	0	791
TCGA-55-8205	TCGA-55-8205-01A-11R-2241-07	0	0	0	0	0	2.5317	0	0	0	0	0.3165	0	0	1.2658	0	3.1646	1.2658	0	0	458.87	TCGA-55-8205	LUAD	76	FEMALE	WHITE	Stage IIA	[Not Applicable]	Lung Adenocarcinoma	[Not Available]	2012	[Not Available]	-28063	Alive	WITH TUMOR	599	#N/A	[Not Available]	Distant Metastasis	#N/A	#N/A	495	Progressive Disease	#N/A	#N/A	0	599	0	599
TCGA-55-A48Z	TCGA-55-A48Z-01A-12R-A24X-07	0	0	0	0	0	2.4027	0	0	0	0	0	0	2.8832	3.8443	0	8.1691	13.9356	1.9222	28.3518	306.103	TCGA-55-A48Z	LUAD	60	FEMALE	WHITE	Stage IIIB	[Not Applicable]	Lung Adenocarcinoma	[Not Available]	2012	[Not Available]	-22056	Alive	WITH TUMOR	651	#N/A	[Not Available]	Distant Metastasis	#N/A	#N/A	536	Stable Disease	#N/A	#N/A	0	651	0	651
TCGA-78-8660	TCGA-78-8660-01A-11R-2403-07	0	0	0	0	0	2.3333	0	0	0	0	0	5.2498	108.462	6.4165	4.6665	5.2498	8.7497	0	0.5833	435.736	TCGA-78-8660	LUAD	69	MALE	[Not Evaluated]	Stage IIB	[Not Applicable]	Lung Adenocarcinoma	[Not Available]	2005	[Not Available]	-25422	Dead	WITH TUMOR	#N/A	321	[Not Available]	Distant Metastasis	#N/A	#N/A	242	[Unknown]	#N/A	#N/A	1	321	1	321
TCGA-78-7155	TCGA-78-7155-01A-11R-2039-07	0	0	0	0	0	2.3148	0	0	0	0	0	0	8.6806	0	0.5787	0	0.5787	586.227	17.9398	134.259	TCGA-78-7155	LUAD	68	MALE	WHITE	Stage IB	[Not Applicable]	Lung Adenocarcinoma	[Not Available]	2005	[Not Available]	-24863	Dead	#N/A	#N/A	1171	[Not Available]	#N/A	#N/A	#N/A	209	[Not Available]	#N/A	#N/A	1	1171	#N/A	1171
TCGA-55-6543	TCGA-55-6543-01A-11R-1755-07	0	0	0	0	0	2.2297	0	0	0	0	0	0.5574	0	7.8038	0	0.5574	83.0546	0	1.1148	59.0858	TCGA-55-6543	LUAD	60	FEMALE	WHITE	Stage IA	[Not Applicable]	Lung Adenocarcinoma	[Not Available]	2010	[Not Available]	#N/A	Alive	TUMOR FREE	435	#N/A	[Not Available]	#N/A	#N/A	#N/A	#N/A	Complete Remission/Response	#N/A	#N/A	0	435	0	435
TCGA-49-6761	TCGA-49-6761-01A-31R-1949-07	0	0	0	0	0	2.1998	0	0	0	0	1.4665	0	5.8662	2.1998	0.7333	3.6664	0	0	2.1998	302.841	TCGA-49-6761	LUAD	68	FEMALE	WHITE	Stage IIIA	[Not Applicable]	Lung Adenocarcinoma	[Not Available]	2009	[Not Available]	-24849	Alive	TUMOR FREE	354	#N/A	[Not Available]	#N/A	#N/A	#N/A	#N/A	Complete Remission/Response	#N/A	#N/A	0	354	0	354
TCGA-55-8514	TCGA-55-8514-01A-11R-2403-07	0	0	0	0	0	1.9355	0	0	0	0	0	0	0.6452	5.1613	0	0	0	0	4.5161	1.2903	TCGA-55-8514	LUAD	70	FEMALE	BLACK OR AFRICAN AMERICAN	Stage IB	[Not Applicable]	Lung Adenocarcinoma	[Not Available]	2012	[Not Available]	-25608	Alive	TUMOR FREE	520	#N/A	[Not Available]	#N/A	#N/A	#N/A	#N/A	Complete Remission/Response	#N/A	#N/A	0	520	0	520
TCGA-97-A4M0	TCGA-97-A4M0-01A-11R-A24X-07	0	0	0	0	0	1.8248	0	0	0	0	0	0.9124	0	1.3686	0	2.7372	0.9124	0.4562	5.9307	63.4124	TCGA-97-A4M0	LUAD	60	FEMALE	WHITE	Stage IB	[Not Applicable]	Lung Adenocarcinoma	[Not Available]	2012	[Not Available]	-22206	Alive	TUMOR FREE	652	#N/A	[Not Available]	#N/A	#N/A	#N/A	#N/A	Complete Remission/Response	#N/A	#N/A	0	652	0	652
TCGA-78-7537	TCGA-78-7537-01A-11R-2066-07	0	0	0	0	0	1.7832	0	0	0	0	0	0	0	9.2725	0	0	0	0	7.8459	17.8317	TCGA-78-7537	LUAD	72	MALE	[Not Available]	Stage IB	[Not Applicable]	Lung Adenocarcinoma	[Not Available]	2002	[Not Available]	-26610	Dead	#N/A	#N/A	1622	[Not Available]	#N/A	#N/A	#N/A	#N/A	[Not Available]	#N/A	#N/A	1	1622	#N/A	1622
TCGA-J2-A4AG	TCGA-J2-A4AG-01A-11R-A24H-07	0	0	0	0	0	1.6885	0	0	0	0	0	0	2.8141	14.6335	0.5628	6.1911	1.1257	0	0.5628	105.248	TCGA-J2-A4AG	LUAD	66	FEMALE	WHITE	Stage IA	[Not Applicable]	Lung Adenocarcinoma	[Not Available]	2012	[Not Available]	-24224	Alive	TUMOR FREE	988	#N/A	[Not Available]	#N/A	#N/A	#N/A	#N/A	Complete Remission/Response	#N/A	#N/A	0	988	0	988
TCGA-MP-A4TK	TCGA-MP-A4TK-01A-11R-A24X-07	0	0	0	0	0	1.4859	0	0	0	0	0	1.4859	20.7925	3.9624	2.9718	3.4671	4.9529	0	3.9624	38.1377	TCGA-MP-A4TK	LUAD	56	FEMALE	[Unknown]	Stage IIB	[Not Applicable]	Lung Adenocarcinoma	[Not Available]	2002	[Not Available]	-20581	Dead	WITH TUMOR	#N/A	582	[Not Available]	Distant Metastasis	#N/A	#N/A	397	Complete Remission/Response	#N/A	#N/A	1	582	1	582
TCGA-97-8174	TCGA-97-8174-01A-11R-2287-07	0	0	0	0	0	1.3688	0	0	0	0	0.5475	0	0.2738	4.1065	0.2738	15.3309	0.8213	0	1.9164	15.8784	TCGA-97-8174	LUAD	67	MALE	WHITE	Stage IIA	[Not Applicable]	Lung Adenocarcinoma	[Not Available]	2011	[Not Available]	-24725	Dead	#N/A	#N/A	164	[Not Available]	#N/A	#N/A	#N/A	#N/A	[Not Available]	#N/A	#N/A	1	164	#N/A	164
TCGA-69-7764	TCGA-69-7764-01A-11R-2170-07	0	0	0	0	0	1.3263	0	0	0	0	0	1.3263	1.3263	165.782	0	103.448	7.2944	0	1.3263	208.886	TCGA-69-7764	LUAD	75	MALE	WHITE	Stage IA	[Not Applicable]	Lung Adenocarcinoma	[Not Available]	2010	[Not Available]	-27693	Alive	TUMOR FREE	414	#N/A	[Not Available]	#N/A	#N/A	#N/A	#N/A	[Not Available]	#N/A	#N/A	0	414	0	414
TCGA-49-6767	TCGA-49-6767-01A-11R-1858-07	0	0	0	0	0	1.1834	0	0	0	0	0	0	0	0.5917	0	0.5917	0	0	1.1834	57.9882	TCGA-49-6767	LUAD	46	FEMALE	WHITE	Stage IIB	[Not Applicable]	Lung Adenocarcinoma	[Not Available]	2010	[Not Available]	-17108	Alive	TUMOR FREE	677	#N/A	[Not Available]	#N/A	#N/A	#N/A	#N/A	[Unknown]	#N/A	#N/A	0	677	0	677
TCGA-MN-A4N5	TCGA-MN-A4N5-01A-11R-A24X-07	0	1.248	0	0	0	1.1142	0	0	0	0	0	0	0	0	0	5.5118	1.1811	0	1.5748	150	TCGA-MN-A4N5	LUAD	63	MALE	WHITE	Stage IA	[Not Applicable]	Lung Adenocarcinoma	[Not Available]	2011	[Not Available]	-23257	Alive	TUMOR FREE	84	#N/A	[Not Available]	#N/A	#N/A	#N/A	#N/A	Complete Remission/Response	#N/A	#N/A	0	84	0	84
TCGA-86-6562	TCGA-86-6562-01A-11R-1755-07	0	0	0	0	0	1.072	0	0	0	0	0	0.536	2.6799	5.3598	0	0.536	2.1439	0	1.6079	83.0765	TCGA-86-6562	LUAD	52	MALE	WHITE	Stage IIA	[Not Applicable]	Lung Adenocarcinoma	[Not Available]	2011	[Not Available]	-19301	Dead	WITH TUMOR	#N/A	376	[Not Available]	#N/A	#N/A	#N/A	274	Progressive Disease	#N/A	#N/A	1	376	1	376
TCGA-38-4625	TCGA-38-4625-01A-01R-1206-07	0	0	0	0.3745	0	1.0335	0	0	0	0	0	0	0	0.8448	0	3.0977	0.2816	0	0.5632	168.403	TCGA-38-4625	LUAD	66	FEMALE	WHITE	Stage IB	[Not Applicable]	Lung Adenocarcinoma	[Not Available]	2002	[Not Available]	-24241	Alive	#N/A	2973	#N/A	[Not Available]	#N/A	#N/A	#N/A	#N/A	Complete Remission/Response	#N/A	#N/A	0	2973	0	2973
TCGA-44-2665	TCGA-44-2665-01A-01R-0946-07	0	0	0	0	0	0.9488	0	0	0	0	0	0.9488	0	0.9488	0	3.3207	2.3719	0.4744	1.4231	5.6926	TCGA-44-2665	LUAD	55	FEMALE	WHITE	Stage IIB	[Not Applicable]	Lung Adenocarcinoma	[Not Available]	2009	[Not Available]	-20349	Alive	TUMOR FREE	1301	#N/A	[Not Available]	#N/A	#N/A	#N/A	#N/A	Stable Disease	#N/A	#N/A	0	1301	0	1301
TCGA-MP-A4TH	TCGA-MP-A4TH-01A-31R-A262-07	0	0	0	0	0	0.9225	0	0	0	0	0	0	0.4613	3.2288	0	7.3801	2.7675	0	2.7675	39.2066	TCGA-MP-A4TH	LUAD	70	FEMALE	WHITE	Stage IA	[Not Applicable]	Lung Adenocarcinoma	[Not Available]	2012	[Not Available]	-25759	Alive	TUMOR FREE	741	#N/A	[Not Available]	#N/A	#N/A	#N/A	#N/A	Complete Remission/Response	#N/A	#N/A	0	741	0	741
TCGA-55-7727	TCGA-55-7727-01A-11R-2170-07	0	0	0	0	0	0.9174	0	0	0	0	0	0	1.8349	2.7523	3.6697	4.5872	4.5872	0	2.7523	145.872	TCGA-55-7727	LUAD	70	MALE	WHITE	Stage IIIA	[Not Applicable]	Lung Adenocarcinoma	[Not Available]	2011	[Not Available]	-25929	Alive	TUMOR FREE	119	#N/A	[Not Available]	#N/A	#N/A	#N/A	#N/A	Complete Remission/Response	#N/A	#N/A	0	119	0	119
TCGA-44-6779	TCGA-44-6779-01A-11R-1858-07	0	0	0	0	0	0.797	0	0	0	0	0	0	0	1.5939	0	0.797	3.1879	0	0	25.5031	TCGA-44-6779	LUAD	50	FEMALE	WHITE	Stage IIB	[Not Applicable]	Lung Adenocarcinoma	[Not Available]	2008	[Not Available]	-18469	Dead	WITH TUMOR	#N/A	500	[Not Available]	#N/A	#N/A	#N/A	232	Progressive Disease	#N/A	#N/A	1	500	1	500
TCGA-44-8117	TCGA-44-8117-01A-11R-2241-07	0	0	0	0	0	0.5781	0	0	0	0	0	0.2891	0	0	0	0.5781	0.8672	0	0.2891	836.537	TCGA-44-8117	LUAD	54	FEMALE	WHITE	Stage IB	[Not Applicable]	Lung Adenocarcinoma	[Not Available]	2011	[Not Available]	-19855	Alive	TUMOR FREE	385	#N/A	[Not Available]	#N/A	#N/A	#N/A	#N/A	Complete Remission/Response	#N/A	#N/A	0	385	0	385
TCGA-44-5645	TCGA-44-5645-01A-01R-1628-07	0	0	0	0	0	0.5737	0	0	0	0	0.5737	0	0	23.5227	0	0.5737	2.2949	0.5737	5.7372	164.085	TCGA-44-5645	LUAD	61	FEMALE	BLACK OR AFRICAN AMERICAN	Stage IA	[Not Applicable]	Lung Adenocarcinoma	[Not Available]	2010	[Not Available]	-22471	Alive	TUMOR FREE	852	#N/A	[Not Available]	#N/A	#N/A	#N/A	#N/A	Complete Remission/Response	#N/A	#N/A	0	852	0	852
TCGA-95-7567	TCGA-95-7567-01A-11R-2066-07	0	0	0	0	0	0.5626	0	0	0	0	0	0.5626	0	3.6568	0	0.2813	0.5626	0	0.8439	0.5626	TCGA-95-7567	LUAD	61	MALE	WHITE	Stage IIB	[Not Applicable]	Lung Adenocarcinoma	[Not Available]	2011	[Not Available]	-22437	Alive	TUMOR FREE	568	#N/A	[Not Available]	#N/A	#N/A	#N/A	#N/A	Stable Disease	#N/A	#N/A	0	568	0	568
TCGA-44-8119	TCGA-44-8119-01A-11R-2241-07	0	0	0	0	0	0.5261	0	0	0	0	0	0.7891	1.5782	1.3152	0.263	2.3673	0	22.0951	1.5782	148.879	TCGA-44-8119	LUAD	73	MALE	WHITE	Stage IIB	[Not Applicable]	Lung Adenocarcinoma	[Not Available]	2012	[Not Available]	-27003	Alive	TUMOR FREE	285	#N/A	[Not Available]	#N/A	#N/A	#N/A	#N/A	Complete Remission/Response	#N/A	#N/A	0	285	0	285
TCGA-05-4415	TCGA-05-4415-01A-22R-1858-07	0	0	0	0	0	0.4444	0	0	0	0	0.8889	0	0	0	0	1.7778	14.2222	0	0.8889	6.6667	TCGA-05-4415	LUAD	57	MALE	[Not Available]	Stage IIIB	[Not Applicable]	Lung Adenocarcinoma	[Not Available]	2008	[Not Available]	-20880	Dead	WITH TUMOR	#N/A	91	[Not Available]	#N/A	#N/A	#N/A	60	Progressive Disease	#N/A	#N/A	1	91	1	91
TCGA-NJ-A4YP	TCGA-NJ-A4YP-01A-11R-A262-07	0	0.8943	3.6077	0	0	0.0686	0	0	0	0	0	0.2541	1.8699	35.8232	0.2541	14.7358	4.5732	0	2.2866	41.6667	TCGA-NJ-A4YP	LUAD	52	MALE	WHITE	Stage IB	[Not Applicable]	Lung Adenocarcinoma	[Not Available]	2011	[Not Available]	-19106	Alive	TUMOR FREE	50	#N/A	[Not Available]	#N/A	#N/A	#N/A	#N/A	Stable Disease	#N/A	#N/A	0	50	0	50
TCGA-97-7546	TCGA-97-7546-01A-11R-2039-07	0	0	0	0	1.0438	0	0	0	0	0	0	0	0.5219	1.5658	0	13.048	0.5219	0	0.5219	69.4154	TCGA-97-7546	LUAD	76	FEMALE	WHITE	Stage IA	[Not Applicable]	Lung Adenocarcinoma	[Not Available]	2008	[Not Available]	-27913	Alive	WITH TUMOR	1285	#N/A	[Not Available]	New Primary Tumor	#N/A	#N/A	1255	Progressive Disease	#N/A	#N/A	0	1285	0	1285
TCGA-91-8496	TCGA-91-8496-01A-11R-2403-07	0	0	0	0	0	0	0	0	0	0	0	0	0	359.326	0	10.0673	1.5488	2.3232	0	85.9594	TCGA-91-8496	LUAD	63	FEMALE	WHITE	Stage IB	[Not Applicable]	Lung Adenocarcinoma	[Not Available]	2011	[Not Available]	-23358	Alive	TUMOR FREE	505	#N/A	[Not Available]	#N/A	#N/A	#N/A	#N/A	Complete Remission/Response	#N/A	#N/A	0	505	0	505
TCGA-50-6594	TCGA-50-6594-01A-11R-1755-07	0	0	0	0	0	0	0	0	0	0	0	0	0	0	0	0	0.7042	0.7042	143.662	114.085	TCGA-50-6594	LUAD	79	FEMALE	BLACK OR AFRICAN AMERICAN	Stage IIIA	[Not Applicable]	Lung Adenocarcinoma	[Not Available]	2009	[Not Available]	-28924	Dead	WITH TUMOR	#N/A	370	[Not Available]	Distant Metastasis	#N/A	#N/A	285	Progressive Disease	#N/A	#N/A	1	370	1	370
TCGA-55-8301	TCGA-55-8301-01A-11R-2287-07	0	0	0	0	0	0	0	0	0	0	0	0	0	7.7419	0	0.4301	0.8602	0.4301	24.086	61.9355	TCGA-55-8301	LUAD	58	MALE	WHITE	Stage IB	[Not Applicable]	Lung Adenocarcinoma	[Not Available]	2012	[Not Available]	-21535	Alive	WITH TUMOR	534	#N/A	[Not Available]	Locoregional Recurrence	#N/A	#N/A	238	Complete Remission/Response	#N/A	#N/A	0	534	0	534
TCGA-44-7662	TCGA-44-7662-01A-11R-2066-07	0	0	0	0	0	0	0	0	0	0	0	0	0	5.9193	0	3.2556	0.5919	0.296	1.1839	0.296	TCGA-44-7662	LUAD	61	MALE	WHITE	Stage IB	[Not Applicable]	Lung Adenocarcinoma	[Not Available]	2011	[Not Available]	-22543	Alive	TUMOR FREE	218	#N/A	[Not Available]	#N/A	#N/A	#N/A	#N/A	Complete Remission/Response	#N/A	#N/A	0	218	0	218
TCGA-35-4123	TCGA-35-4123-01A-01R-1107-07	0	0	0	0	0	0	0	0	0	0	0	0	15.9353	1.7564	2.1955	0.8782	1.3173	0	0	458.43	TCGA-35-4123	LUAD	38	MALE	WHITE	Stage IA	[Not Applicable]	Lung Adenocarcinoma	[Not Available]	2010	[Not Available]	-14064	Alive	TUMOR FREE	182	#N/A	[Not Available]	#N/A	#N/A	#N/A	#N/A	[Not Available]	#N/A	#N/A	0	182	0	182
TCGA-86-8673	TCGA-86-8673-01A-11R-2403-07	0	0	0	0	0	0	0	0	0	0	0	0	0	2.9326	0	0	0.5865	0	0.5865	142.522	TCGA-86-8673	LUAD	61	MALE	WHITE	Stage IB	[Not Applicable]	Lung Adenocarcinoma	[Not Available]	2011	[Not Available]	-22571	Alive	TUMOR FREE	862	#N/A	[Not Available]	Locoregional Recurrence	#N/A	#N/A	636	Complete Remission/Response	#N/A	#N/A	0	862	0	862
TCGA-55-7914	TCGA-55-7914-01A-11R-2170-07	0	0	0	0	0	0	0	0	0	0	0	0	0.4998	0.9995	0	1.4993	2.9985	0	2.4988	81.4593	TCGA-55-7914	LUAD	71	FEMALE	WHITE	Stage IIA	[Not Applicable]	Lung Adenocarcinoma	[Not Available]	2011	[Not Available]	-26105	Dead	WITH TUMOR	#N/A	187	[Not Available]	#N/A	#N/A	#N/A	#N/A	Progressive Disease	#N/A	#N/A	1	187	1	187
TCGA-L9-A444	TCGA-L9-A444-01A-21R-A24H-07	0	0	0	0	0	0	0	0	0	0	0	0	0	2.2779	0	0	0	0	6.0744	59.9848	TCGA-L9-A444	LUAD	60	FEMALE	WHITE	Stage IA	[Not Applicable]	Lung Adenocarcinoma	[Not Available]	2012	[Not Available]	-22202	Alive	TUMOR FREE	307	#N/A	[Not Available]	#N/A	#N/A	#N/A	#N/A	Complete Remission/Response	#N/A	#N/A	0	307	0	307
TCGA-NJ-A4YF	TCGA-NJ-A4YF-01A-12R-A262-07	0	0	0	0	0	0	0	0	0	0	0	0	0.6075	0	0	2.4301	0	0	0	23.0863	TCGA-NJ-A4YF	LUAD	50	FEMALE	BLACK OR AFRICAN AMERICAN	Stage IA	[Not Applicable]	Lung Adenocarcinoma	[Not Available]	2007	[Not Available]	-18584	Alive	TUMOR FREE	2161	#N/A	[Not Available]	#N/A	#N/A	#N/A	#N/A	Stable Disease	#N/A	#N/A	0	2161	0	2161
TCGA-NJ-A4YQ	TCGA-NJ-A4YQ-01A-11R-A262-07	0	0	0	0	0	0	0	0	0	0	0.6277	5.022	10.0439	6.2775	0	0.6277	3.7665	0	3.7665	11.9272	TCGA-NJ-A4YQ	LUAD	69	FEMALE	WHITE	Stage IA	[Not Applicable]	Lung Adenocarcinoma	[Not Available]	2011	[Not Available]	-25427	Alive	TUMOR FREE	1432	#N/A	[Not Available]	#N/A	#N/A	#N/A	#N/A	Stable Disease	#N/A	#N/A	0	1432	0	1432
TCGA-78-7156	TCGA-78-7156-01A-11R-2039-07	0	0	0	0	0	0	0	0	0	0	0	0	0	6.2189	0	1.8657	1.2438	0	1.8657	3.1095	TCGA-78-7156	LUAD	62	MALE	WHITE	Stage IV	[Not Applicable]	Lung Adenocarcinoma	[Not Available]	2006	[Not Available]	-22720	Dead	#N/A	#N/A	976	[Not Available]	#N/A	#N/A	#N/A	#N/A	[Not Available]	#N/A	#N/A	1	976	#N/A	976
[truncated: 4 more columns]

## Sheet: 512 LUAD in this study
512 LUAD tumors included in this study
TCGA Cancer type		Tumor_Sample_Barcode	Matched_Norm_Sample_Barcode
LUAD	TCGA-05-4244	TCGA-05-4244-01A-01D-1105-08	TCGA-05-4244-10A-01D-1105-08
LUAD	TCGA-05-4382	TCGA-05-4382-01A-01D-1931-08	TCGA-05-4382-10A-01D-1265-08
LUAD	TCGA-05-4384	TCGA-05-4384-01A-01D-1753-08	TCGA-05-4384-10A-01D-1753-08
LUAD	TCGA-05-4389	TCGA-05-4389-01A-01D-1265-08	TCGA-05-4389-10A-01D-1265-08
LUAD	TCGA-05-4390	TCGA-05-4390-01A-02D-1753-08	TCGA-05-4390-10A-01D-1753-08
LUAD	TCGA-05-4395	TCGA-05-4395-01A-01D-1265-08	TCGA-05-4395-10A-01D-1265-08
LUAD	TCGA-05-4396	TCGA-05-4396-01A-21D-1855-08	TCGA-05-4396-10A-01D-1855-08
LUAD	TCGA-05-4397	TCGA-05-4397-01A-01D-1265-08	TCGA-05-4397-10A-01D-1265-08
LUAD	TCGA-05-4398	TCGA-05-4398-01A-01D-1265-08	TCGA-05-4398-10A-01D-1265-08
LUAD	TCGA-05-4402	TCGA-05-4402-01A-01D-1265-08	TCGA-05-4402-10A-01D-1265-08
LUAD	TCGA-05-4403	TCGA-05-4403-01A-01D-1265-08	TCGA-05-4403-10A-01D-1265-08
LUAD	TCGA-05-4405	TCGA-05-4405-01A-21D-1855-08	TCGA-05-4405-10A-01D-1855-08
LUAD	TCGA-05-4410	TCGA-05-4410-01A-21D-1855-08	TCGA-05-4410-10A-01D-1855-08
LUAD	TCGA-05-4415	TCGA-05-4415-01A-22D-1855-08	TCGA-05-4415-10A-01D-1855-08
LUAD	TCGA-05-4417	TCGA-05-4417-01A-22D-1855-08	TCGA-05-4417-10A-01D-1855-08
LUAD	TCGA-05-4418	TCGA-05-4418-01A-01D-1265-08	TCGA-05-4418-10A-01D-1265-08
[truncated: 496 more rows]

## Sheet: 209 LUAD with mutation
209 LUAD tumors with UGT mutations
[truncated: 210 more rows]
[truncated: 123 more columns]

## Sheet: 286 LUAD without mutations
286 LUAD tumoprs without UGT mutations
[truncated: 287 more rows]
[truncated: 5 more columns]

[truncated: 2 more sheets: 165 LUAD with mis fra non , 267 UGT mutations ]
